# Supplementary material for: An Unprecedented Number of Cytochrome P450s Are Involved in Secondary Metabolism in Salinispora Species
Source: MDPI journal article supplement (doi:10.3390/microorganisms10050871), 2022-04-21
Supplement: s1 [file s1]

## Table of Contents

|                                                                                                                                                                                                                                                                                                                                                                                           |     |
|-------------------------------------------------------------------------------------------------------------------------------------------------------------------------------------------------------------------------------------------------------------------------------------------------------------------------------------------------------------------------------------------|-----|
| Table S1: Identification of P450s that are part of secondary metabolite biosynthetic gene clusters (smBGCs) in <i>Salinispora</i> species. Cluster-ID and BGC type is retrieved from Integrated Microbial Genomes & Microbiomes (IMG/M) database [57,58]. smBGC Type was indicated for consistency with the standard BGC Type name terminology available in the anti-SMASH database [33]. | 2   |
| Table S2: P450 sequences identified and annotated in <i>Salinispora</i> species. Each P450 is presented with its assigned name followed by gene ID (in parenthesis) and species name.                                                                                                                                                                                                     | 115 |
| Full-length P450s                                                                                                                                                                                                                                                                                                                                                                         | 115 |
| P450-fragments                                                                                                                                                                                                                                                                                                                                                                            | 673 |

Table S1: Identification of P450s that are part of secondary metabolite biosynthesis tic gene clusters (smBGCs) in *Salinispora* species. Cluster-ID and BGC type is retrieved from Integrated Microbial Genomes & Microbiomes (IMG/M) database [57,58]. smBGC Type was indicated for consistency with the standard BGC Type name terminology available in the anti-SMASH database [33].

| Sample Name                         | Genome ID  | No of P450s part of clusters | P450 name | CLUSTER ID                          | BGC TYPE     |
|-------------------------------------|------------|------------------------------|-----------|-------------------------------------|--------------|
| <i>Salinispora arenicola</i> CNR107 | 2519103194 | 1                            | CYP166A4  | 2519124058.c00001_F583DRA...region1 | T1PKS        |
| <i>Salinispora pacifica</i> CNS801  | 2561511036 | 3                            | CYP107AW9 | 2561515277.c00001_T435DRA...region3 | Bacteriocin  |
|                                     |            |                              | CYP1223A5 | 2561515279.c00003_T435DRA...region1 | lipolanthine |
|                                     |            |                              | CYP211C4  | 2561515286.c00010_T435DRA...region1 | T2PKS        |
| <i>Salinispora arenicola</i> CNY011 | 2517572153 | 12                           | CYP208A12 | 2517596201.c00001_C576DRA...region2 | T1PKS        |
|                                     |            |                              | CYP244A4  | 2517596206.c00006_C576DRA...region1 | Indole       |
|                                     |            |                              | CYP245A7  | 2517596206.c00006_C576DRA...region1 | Indole       |
|                                     |            |                              | CYP1051A1 | 2517596207.c00007_C576DRA...region1 | Terpene      |

|                                     |            |    |           |                                     |           |
|-------------------------------------|------------|----|-----------|-------------------------------------|-----------|
|                                     |            |    | CYP105G5  | 2517596207.c00007_C576DRA...region2 | T1PKS     |
|                                     |            |    | CYP107Q4  | 2517596207.c00007_C576DRA...region2 | T1PKS     |
|                                     |            |    | CYP166A4  | 2517596209.c00009_C576DRA...region1 | T1PKS     |
|                                     |            |    | CYP154M15 | 2517596211.c00011_C576DRA...region1 | ladderane |
|                                     |            |    | CYP125G6  | 2517596211.c00011_C576DRA...region1 | ladderane |
|                                     |            |    | CYP107FS2 | 2517596211.c00011_C576DRA...region1 | ladderane |
|                                     |            |    | CYP105CN1 | 2517596211.c00011_C576DRA...region1 | ladderane |
|                                     |            |    | CYP105CP2 | 2517596211.c00011_C576DRA...region1 | ladderane |
| <i>Salinispora arenicola</i> CNX508 | 2515154188 | 14 | CYP244A4  | 2515169292.c00005_B111DRA...region1 | Indole    |
|                                     |            |    | CYP245A7  | 2515169292.c00005_B111DRA...region1 | Indole    |
|                                     |            |    | CYP154M5  | 2515169296.c00009_B111DRA...region1 | T1PKS     |

|  |  |  |           |                                     |                |
|--|--|--|-----------|-------------------------------------|----------------|
|  |  |  | CYP105CT1 | 2515169296.c00009_B111DRA...region1 | T1PKS          |
|  |  |  | CYP1051A1 | 2515169297.c00010_B111DRA...region1 | Terpene        |
|  |  |  | CYP105G5  | 2515169297.c00010_B111DRA...region2 | T1PKS          |
|  |  |  | CYP107Q4  | 2515169297.c00010_B111DRA...region2 | T1PKS          |
|  |  |  | CYP105CP2 | 2515169300.c00013_B111DRA...region2 | NRPS           |
|  |  |  | CYP105CN1 | 2515169300.c00013_B111DRA...region2 | NRPS           |
|  |  |  | CYP107FS2 | 2515169300.c00013_B111DRA...region2 | NRPS           |
|  |  |  | CYP208A12 | 2515169301.c00014_B111DRA...region1 | T1PKS          |
|  |  |  | CYP211C1  | 2515169303.c00016_B111DRA...region1 | T2PKS          |
|  |  |  | CYP105W2  | 2515169305.c00018_B111DRA...region1 | NRPS           |
|  |  |  | CYP248A2  | 2515169312.c00025_B111DRA...region1 | oligosaccharid |

|                                      |            |    |           |                                     |         |
|--------------------------------------|------------|----|-----------|-------------------------------------|---------|
| <i>Salinispora arenicola</i> CNY 237 | 2517572163 | 17 | CYP211C1  | 2517597048.c00002_C586DRA...region1 | T2PKS   |
|                                      |            |    | CYP245A7  | 2517597050.c00004_C586DRA...region2 | Indole  |
|                                      |            |    | CYP244A4  | 2517597050.c00004_C586DRA...region2 | Indole  |
|                                      |            |    | CYP105CP2 | 2517597050.c00004_C586DRA...region4 | NRPS    |
|                                      |            |    | CYP105CN1 | 2517597050.c00004_C586DRA...region4 | NRPS    |
|                                      |            |    | CYP107FS2 | 2517597050.c00004_C586DRA...region4 | NRPS    |
|                                      |            |    | CYP166A4  | 2517597054.c00008_C586DRA...region1 | T1PKS   |
|                                      |            |    | CYP1051A1 | 2517597055.c00009_C586DRA...region1 | Terpene |
|                                      |            |    | CYP105G5  | 2517597055.c00009_C586DRA...region2 | T1PKS   |
|                                      |            |    | CYP107Q4  | 2517597055.c00009_C586DRA...region2 | T1PKS   |
|                                      |            |    | CYP208A12 | 2517597057.c00011_C586DRA...region1 | T1PKS   |

|                                     |            |   |           |                                     |                 |
|-------------------------------------|------------|---|-----------|-------------------------------------|-----------------|
|                                     |            |   | CYP107AY2 | 2517597063.c00017_C586DRA...region1 | NRPS            |
|                                     |            |   | CYP105CT1 | 2517597063.c00017_C586DRA...region1 | NRPS            |
|                                     |            |   | CYP154M5  | 2517597063.c00017_C586DRA...region1 | NRPS            |
|                                     |            |   | CYP107EU1 | 2517597073.c00027_C586DRA...region1 | T1PKS           |
|                                     |            |   | CYP248A2  | 2517597074.c00028_C586DRA...region1 | oligosaccharide |
|                                     |            |   | CYP105CH1 | 2517597075.c00029_C586DRA...region1 | T1PKS           |
| <i>Salinispora arenicola</i> CNT005 | 2517572137 | 9 | CYP211C1  | 2517589297.c00005_B110DRA...region2 | T2PKS           |
|                                     |            |   | CYP105W2  | 2517589298.c00006_B110DRA...region1 | oligosaccharide |
|                                     |            |   | CYP107FS2 | 2517589298.c00006_B110DRA...region1 | oligosaccharide |
|                                     |            |   | CYP105CN1 | 2517589298.c00006_B110DRA...region1 | oligosaccharide |
|                                     |            |   | CYP105CP2 | 2517589298.c00006_B110DRA...region1 | oligosaccharide |

|                                   |            |   |           |                                     |             |
|-----------------------------------|------------|---|-----------|-------------------------------------|-------------|
|                                   |            |   | CYP244A4  | 2517589299.c00007_B110DRA...region1 | Indole      |
|                                   |            |   | CYP245A7  | 2517589299.c00007_B110DRA...region1 | Indole      |
|                                   |            |   | CYP113D13 | 2517589300.c00008_B110DRA...region1 | NRPS        |
|                                   |            |   | CYP163B22 | 2517589300.c00008_B110DRA...region1 | NRPS        |
| <i>Salinispora tropica</i> CNS416 | 2517572164 | 9 | CYP107AY1 | 2517597114.c00001_C590DRA...region2 | NRPS        |
|                                   |            |   | CYP163B1  | 2517597115.c00002_C590DRA...region1 | NRPS        |
|                                   |            |   | CYP211C1  | 2517597116.c00003_C590DRA...region1 | T2PKS       |
|                                   |            |   | CYP208A4  | 2517597116.c00003_C590DRA...region3 | NRPS        |
|                                   |            |   | CYP154M1  | 2517597116.c00003_C590DRA...region3 | NRPS        |
|                                   |            |   | CYP107AW1 | 2517597117.c00004_C590DRA...region2 | Bacteriocin |
|                                   |            |   | CYP1004B1 | 2517597136.c00023_C590DRA...region1 | NRPS        |

|                                     |            |    |                    |                                     |             |
|-------------------------------------|------------|----|--------------------|-------------------------------------|-------------|
|                                     |            |    | CYP1004A1          | 2517597136.c00023_C590DRA...region1 | NRPS        |
|                                     |            |    | CYP125G1           | 2517597148.c00035_C590DRA...region1 | T1PKS       |
| <i>Salinispora arenicola</i> CNH996 | 2561511104 | 21 | CYP211C1           | 2571043777.c00002_T327DRA...region2 | T2PKS       |
|                                     |            |    | CYP244A4           | 2571043781.c00006_T327DRA...region1 | Indole      |
|                                     |            |    | CYP245A7           | 2571043781.c00006_T327DRA...region1 | Indole      |
|                                     |            |    | CYP107AW7          | 2571043783.c00008_T327DRA...region1 | Bacteriocin |
|                                     |            |    | CYP166A4           | 2571043788.c00013_T327DRA...region1 | NRPS-like   |
|                                     |            |    | CYP107AX-fragment9 | 2571043791.c00016_T327DRA...region1 | ladderane   |
|                                     |            |    | CYP208A12          | 2571043796.c00021_T327DRA...region1 | T1PKS       |
|                                     |            |    | CYP107AY2          | 2571043799.c00024_T327DRA...region1 | NRPS        |
|                                     |            |    | CYP163B21          | 2571043804.c00029_T327DRA...region1 | NRPS        |



|  |  |  |           |                                     |                 |
|--|--|--|-----------|-------------------------------------|-----------------|
|  |  |  | CYP154M5  | 2571043808.c00033_T327DRA...region1 | T1PKS           |
|  |  |  | CYP105CT1 | 2571043808.c00033_T327DRA...region1 | T1PKS           |
|  |  |  | CYP105G5  | 2571043810.c00035_T327DRA...region1 | T1PKS           |
|  |  |  | CYP105CP2 | 2571043810.c00035_T327DRA...region1 | T1PKS           |
|  |  |  | CYP105CN1 | 2571043815.c00040_T327DRA...region1 | NRPS            |
|  |  |  | CYP107FS2 | 2571043815.c00040_T327DRA...region1 | NRPS            |
|  |  |  | CYP247A7  | 2571043815.c00040_T327DRA...region1 | NRPS            |
|  |  |  | CYP248A2  | 2571043818.c00043_T327DRA...region1 | NRPS            |
|  |  |  | CYP105W2  | 2571043825.c00050_T327DRA...region1 | oligosaccharide |
|  |  |  | CYP107NH1 | 2571043825.c00050_T327DRA...region1 | oligosaccharide |
|  |  |  | CYP247A8  | 2571043840.c00065_T327DRA...region1 | NRPS            |

|                                      |  |    |                    |                                     |             |
|--------------------------------------|--|----|--------------------|-------------------------------------|-------------|
|                                      |  |    | CYP1051A1          | 2571043857.c00082_T327DRA...region1 | Terpene     |
| <i>Salinispora arenicola</i> CNH996B |  | 18 | CYP211C1           | 2561538853.c00002_CC96DRA...region2 | T2PKS       |
|                                      |  |    | CYP107AX-fragment9 | 2561538858.c00007_CC96DRA...region1 | ladderane   |
|                                      |  |    | CYP166A4           | 2561538858.c00007_CC96DRA...region2 | T1PKS       |
|                                      |  |    | CYP244A4           | 2561538859.c00008_CC96DRA...region1 | Indole      |
|                                      |  |    | CYP245A7           | 2561538859.c00008_CC96DRA...region1 | Indole      |
|                                      |  |    | CYP107AW7          | 2561538861.c00010_CC96DRA...region1 | Bacteriocin |
|                                      |  |    | CYP208A12          | 2561538871.c00020_CC96DRA...region1 | T1PKS       |
|                                      |  |    | CYP163B21          | 2561538876.c00025_CC96DRA...region1 | NRPS        |
|                                      |  |    | CYP154M5           | 2561538881.c00030_CC96DRA...region1 | T1PKS       |
|                                      |  |    | CYP105CT1          | 2561538881.c00030_CC96DRA...region1 | T1PKS       |

|                                    |            |   |           |                                     |                 |
|------------------------------------|------------|---|-----------|-------------------------------------|-----------------|
|                                    |            |   | CYP105G5  | 2561538883.c00032_CC96DRA...region1 | T1PKS           |
|                                    |            |   | CYP107Q4  | 2561538883.c00032_CC96DRA...region1 | T1PKS           |
|                                    |            |   | CYP107FS2 | 2561538884.c00033_CC96DRA...region1 | NRPS            |
|                                    |            |   | CYP105CN1 | 2561538887.c00036_CC96DRA...region1 | NRPS            |
|                                    |            |   | CYP105CP2 | 2561538887.c00036_CC96DRA...region1 | NRPS            |
|                                    |            |   | CYP247A7  | 2561538892.c00041_CC96DRA...region1 | other           |
|                                    |            |   | CYP105W2  | 2561538896.c00045_CC96DRA...region1 | oligosaccharide |
|                                    |            |   | CYP248A2  | 2561538896.c00045_CC96DRA...region1 | oligosaccharide |
| <i>Salinispora pacifica</i> CNT138 | 2516143118 | 7 | CYP245A11 | 2516156462.c00001_B173DRA...region4 | NRPS            |
|                                    |            |   | CYP107AW6 | 2516156462.c00001_B173DRA...region5 | Bacteriocin     |
|                                    |            |   | CYP244A5  | 2516156462.c00001_B173DRA...region9 | T2PKS           |

|                                    |            |   |           |                                     |             |
|------------------------------------|------------|---|-----------|-------------------------------------|-------------|
|                                    |            |   | CYP211C6  | 2516156462.c00001_B173DRA...region9 | T2PKS       |
|                                    |            |   | CYP154M16 | 2516156462.c00001_B173DRA...region6 | NRPS        |
|                                    |            |   | CYP107AY7 | 2516156476.c00015_B173DRA...region1 | terpene     |
|                                    |            |   | CYP1278A4 | 2516156480.c00019_B173DRA...region1 | NRPS        |
| <i>Salinispora pacifica</i> CNT001 | 2515154184 | 9 | CYP107AW7 | 2515168971.c00001_B169DRA...region2 | Bacteriocin |
|                                    |            |   | CYP208A22 | 2515168973.c00003_B169DRA...region2 | T1PKS       |
|                                    |            |   | CYP161N4  | 2515168995.c00025_B169DRA...region1 | T3PKS       |
|                                    |            |   | CYP2054A3 | 2515168995.c00025_B169DRA...region1 | T3PKS       |
|                                    |            |   | CYP107FH3 | 2515168995.c00025_B169DRA...region1 | T3PKS       |
|                                    |            |   | CYP107AY9 | 2515168997.c00027_B169DRA...region1 | terpene     |
|                                    |            |   | CYP244A10 | 2515168997.c00027_B169DRA...region1 | terpene     |

|                                       |            |   |           |                                      |             |
|---------------------------------------|------------|---|-----------|--------------------------------------|-------------|
|                                       |            |   | CYP107E37 | 2515169026.c00056_B169DRA...region1  | T1PKS       |
|                                       |            |   | CYP294A4  | 2515169033.c00063_B169DRA...region1  | T1PKS       |
| <i>Salinispora pacifica</i> DSM 45547 | 2516493032 | 7 | CYP107AY7 | 2516493519.c00001_SALPAC4...region6  | NRPS        |
|                                       |            |   | CYP244A5  | 2516493519.c00001_SALPAC4...region14 | NRPS        |
|                                       |            |   | CYP245A11 | 2516493519.c00001_SALPAC4...region14 | NRPS        |
|                                       |            |   | CYP107AW6 | 2516493519.c00001_SALPAC4...region15 | Bacteriocin |
|                                       |            |   | CYP154M16 | 2516493519.c00001_SALPAC4...region16 | NRPS        |
|                                       |            |   | CYP211C6  | 2516493519.c00001_SALPAC4...region16 | NRPS        |
|                                       |            |   | CYP1278A4 | 2516493519.c00001_SALPAC4...region22 | NRPS        |
| <i>Salinispora pacifica</i> DSM 45548 | 2517287023 | 4 | CYP1278B4 | 2517287721.c00001_Salpac2...region1  | NRPS        |
|                                       |            |   | CYP107AW9 | 2517287721.c00001_Salpac2...region3  | Bacteriocin |

|                                    |                |   |                        |                                          |              |
|------------------------------------|----------------|---|------------------------|------------------------------------------|--------------|
|                                    |                |   | CYP211C4               | 2517287721.c00001_Salpac2...region<br>6  | T2PKS        |
|                                    |                |   | CYP1223A5              | 2517287721.c00001_Salpac2...region<br>11 | lipolanthine |
| <i>Salinispora pacifica</i> CNH732 | 257104200<br>6 | 9 | CYP107AW7              | 2571042892.c00004_T392DRA...regi<br>on2  | Bacteriocin  |
|                                    |                |   | CYP208A22              | 2571042893.c00005_T392DRA...regi<br>on1  | T1PKS        |
|                                    |                |   | CYP107FH3              | 2571042907.c00019_T392DRA...regi<br>on1  | NRPS-like    |
|                                    |                |   | CYP2054A3              | 2571042907.c00019_T392DRA...regi<br>on1  | NRPS-like    |
|                                    |                |   | CYP161N4               | 2571042907.c00019_T392DRA...regi<br>on1  | NRPS-like    |
|                                    |                |   | CYP107AY9              | 2571042909.c00021_T392DRA...regi<br>on1  | terpene      |
|                                    |                |   | CYP244A10              | 2571042909.c00021_T392DRA...regi<br>on1  | terpene      |
|                                    |                |   | CYP1278B-<br>fragment2 | 2571042915.c00027_T392DRA...regi<br>on1  | T1PKS        |
|                                    |                |   | CYP107E37              | 2571042934.c00046_T392DRA...regi<br>on1  | T1PKS        |

|                                    |            |    |           |                                     |             |
|------------------------------------|------------|----|-----------|-------------------------------------|-------------|
| <i>Salinispora pacifica</i> CNT584 | 2517572160 | 11 | CYP154AJ2 | 2517596773.c00001_C582DRA...region1 | terpene     |
|                                    |            |    | CYP211C9  | 2517596773.c00001_C582DRA...region2 | T2PKS       |
|                                    |            |    | CYP244A5  | 2517596774.c00002_C582DRA...region1 | NRPS        |
|                                    |            |    | CYP245A11 | 2517596774.c00002_C582DRA...region1 | NRPS        |
|                                    |            |    | CYP107AW6 | 2517596774.c00002_C582DRA...region2 | Bacteriocin |
|                                    |            |    | CYP161T1  | 2517596782.c00010_C582DRA...region1 | T2PKS       |
|                                    |            |    | CYP208A27 | 2517596785.c00013_C582DRA...region1 | T1PKS       |
|                                    |            |    | CYP161N4  | 2517596793.c00021_C582DRA...region1 | NRPS-like   |
|                                    |            |    | CYP2054A3 | 2517596793.c00021_C582DRA...region1 | NRPS-like   |
|                                    |            |    | CYP107FH3 | 2517596793.c00021_C582DRA...region1 | NRPS-like   |
|                                    |            |    | CYP107AY8 | 2517596807.c00035_C582DRA...region1 | NRPS        |

|                                    |            |    |                    |                                     |                  |
|------------------------------------|------------|----|--------------------|-------------------------------------|------------------|
| <i>Salinispora pacifica</i> CNS237 | 2524614807 | 14 | CYP211C7           | 2524706086.c00001_H303DRA...region1 | T2PKS            |
|                                    |            |    | CYP285D2           | 2524706086.c00001_H303DRA...region3 | NRPS             |
|                                    |            |    | CYP245A12          | 2524706086.c00001_H303DRA...region4 | indole           |
|                                    |            |    | CYP244A5           | 2524706086.c00001_H303DRA...region4 | indole           |
|                                    |            |    | CYP163B17          | 2524706086.c00001_H303DRA...region5 | transAT-PKS-like |
|                                    |            |    | CYP244A8           | 2524706087.c00002_H303DRA...region3 | NRPS             |
|                                    |            |    | CYP107AY-fragment1 | 2524706087.c00002_H303DRA...region3 | NRPS             |
|                                    |            |    | CYP107NE1          | 2524706091.c00006_H303DRA...region1 | T1PKS            |
|                                    |            |    | CYP154M18          | 2524706091.c00006_H303DRA...region3 | NRPS             |
|                                    |            |    | CYP208A28          | 2524706091.c00006_H303DRA...region3 | NRPS             |
|                                    |            |    | CYP107AW4          | 2524706097.c00012_H303DRA...region2 | Bacteriocin      |



|                                    |            |    |           |                                     |             |
|------------------------------------|------------|----|-----------|-------------------------------------|-------------|
|                                    |            |    | CYP113E2  | 2524706101.c00016_H303DRA...region1 | T1PKS       |
|                                    |            |    | CYP107EP2 | 2524706101.c00016_H303DRA...region1 | T1PKS       |
|                                    |            |    | CYP105AH4 | 2524706103.c00018_H303DRA...region1 | other       |
| <i>Salinispora pacifica</i> CNT045 | 2517572158 | 12 | CYP154M16 | 2517596646.c00001_C554DRA...region1 | NRPS        |
|                                    |            |    | CYP208A21 | 2517596646.c00001_C554DRA...region1 | NRPS        |
|                                    |            |    | CYP107AW6 | 2517596646.c00001_C554DRA...region2 | Bacteriocin |
|                                    |            |    | CYP245A11 | 2517596646.c00001_C554DRA...region3 | indole      |
|                                    |            |    | CYP244A5  | 2517596646.c00001_C554DRA...region3 | indole      |
|                                    |            |    | CYP211C6  | 2517596647.c00002_C554DRA...region4 | T2PKS       |
|                                    |            |    | CYP162A8  | 2517596652.c00007_C554DRA...region1 | NRPS-like   |
|                                    |            |    | CYP107CL2 | 2517596656.c00011_C554DRA...region1 | NRPS        |

|                                    |            |   |           |                                     |                  |
|------------------------------------|------------|---|-----------|-------------------------------------|------------------|
|                                    |            |   | CYP1056B2 | 2517596656.c00011_C554DRA...region1 | NRPS             |
|                                    |            |   | CYP163B20 | 2517596659.c00014_C554DRA...region1 | transAT-PKS-like |
|                                    |            |   | CYP107AY7 | 2517596665.c00020_C554DRA...region1 | NRPS             |
|                                    |            |   | CYP107CT3 | 2517596667.c00022_C554DRA...region1 | NRPS             |
| <i>Salinispora pacifica</i> CNY330 | 2518645626 | 9 | CYP107FH3 | 2518683698.c00002_C587DRA...region1 | NRPS-like        |
|                                    |            |   | CYP2054A3 | 2518683698.c00002_C587DRA...region1 | NRPS-like        |
|                                    |            |   | CYP161N4  | 2518683698.c00002_C587DRA...region1 | NRPS-like        |
|                                    |            |   | CYP107AW7 | 2518683706.c00010_C587DRA...region2 | bacteriocin      |
|                                    |            |   | CYP208A22 | 2518683716.c00020_C587DRA...region1 | T1PKS            |
|                                    |            |   | CYP105H11 | 2518683723.c00027_C587DRA...region1 | T1PKS            |
|                                    |            |   | CYP244A10 | 2518683730.c00034_C587DRA...region1 | NRPS             |

|                                     |            |    |           |                                     |                  |
|-------------------------------------|------------|----|-----------|-------------------------------------|------------------|
|                                     |            |    | CYP107AY9 | 2518683730.c00034_C587DRA...region1 | NRPS             |
|                                     |            |    | CYP107E37 | 2518683751.c00055_C587DRA...region1 | T1PKS            |
| <i>Salinispora arenicola</i> CNH964 | 2515154125 | 1  | CYP208A12 | 2515164749.c00002_B164DRA...region2 | T1PKS            |
| <i>Salinispora pacifica</i> CNT403  | 2561511034 | 12 | CYP244A5  | 2561515055.c00005_T427DRA...region1 | NRPS             |
|                                     |            |    | CYP245A11 | 2561515055.c00005_T427DRA...region1 | NRPS             |
|                                     |            |    | CYP107AW6 | 2561515055.c00005_T427DRA...region2 | Bacteriocin      |
|                                     |            |    | CYP211C6  | 2561515058.c00008_T427DRA...region2 | T2PKS            |
|                                     |            |    | CYP208A26 | 2561515061.c00011_T427DRA...region2 | T1PKS            |
|                                     |            |    | CYP163B20 | 2561515063.c00013_T427DRA...region1 | transAT-PKS-like |
|                                     |            |    | CYP162A8  | 2561515066.c00016_T427DRA...region1 | NRPS-like        |
|                                     |            |    | CYP1269A2 | 2561515068.c00018_T427DRA...region1 | oligosaccharide  |

|                                     |            |   |           |                                     |                  |
|-------------------------------------|------------|---|-----------|-------------------------------------|------------------|
|                                     |            |   | CYP107AY7 | 2561515072.c00022_T427DRA...region1 | NRPS             |
|                                     |            |   | CYP208A21 | 2561515087.c00037_T427DRA...region1 | NRPS             |
|                                     |            |   | CYP154M16 | 2561515087.c00037_T427DRA...region1 | NRPS             |
|                                     |            |   | CYP107CT3 | 2561515091.c00041_T427DRA...region1 | NRPS             |
| <i>Salinispora pacifica</i> CNT-133 | 2548876971 | 1 | CYP163B20 | 2582697582.HQ215062.region1         | transAT-PKS-like |
| <i>Salinispora pacifica</i> CNQ768  | 2517572155 | 8 | CYP208A22 | 2517596374.c00003_C581DRA...region1 | T1PKS            |
|                                     |            |   | CYP107AW7 | 2517596379.c00008_C581DRA...region3 | Bacteriocin      |
|                                     |            |   | CYP107FH3 | 2517596392.c00021_C581DRA...region1 | NRPS-like        |
|                                     |            |   | CYP2054A3 | 2517596392.c00021_C581DRA...region1 | NRPS-like        |
|                                     |            |   | CYP161N4  | 2517596392.c00021_C581DRA...region1 | NRPS-like        |
|                                     |            |   | CYP107AY9 | 2517596394.c00023_C581DRA...region1 | terpene          |

|                                     |            |    |           |                                     |         |
|-------------------------------------|------------|----|-----------|-------------------------------------|---------|
|                                     |            |    | CYP244A10 | 2517596394.c00023_C581DRA...region1 | terpene |
|                                     |            |    | CYP107E37 | 2517596430.c00059_C581DRA...region1 | T1PKS   |
| <i>Salinispora arenicola</i> CNS325 | 2571042009 | 19 | CYP208A12 | 2571043105.c00002_T371DRA...region2 | T1PKS   |
|                                     |            |    | CYP107AY2 | 2571043107.c00004_T371DRA...region1 | NRPS    |
|                                     |            |    | CYP105CT1 | 2571043107.c00004_T371DRA...region2 | terpene |
|                                     |            |    | CYP154M5  | 2571043107.c00004_T371DRA...region2 | terpene |
|                                     |            |    | CYP211C1  | 2571043108.c00005_T371DRA...region2 | T2PKS   |
|                                     |            |    | CYP105CH1 | 2571043110.c00007_T371DRA...region2 | T1PKS   |
|                                     |            |    | CYP244A4  | 2571043111.c00008_T371DRA...region1 | Indole  |
|                                     |            |    | CYP245A7  | 2571043111.c00008_T371DRA...region1 | Indole  |
|                                     |            |    | CYP166A4  | 2571043112.c00009_T371DRA...region2 | T1PKS   |

|                                     |                |    |           |                                         |                 |
|-------------------------------------|----------------|----|-----------|-----------------------------------------|-----------------|
|                                     |                |    | CYP105W2  | 2571043114.c00011_T371DRA...regi<br>on1 | oligosaccharide |
|                                     |                |    | CYP248A2  | 2571043114.c00011_T371DRA...regi<br>on1 | oligosaccharide |
|                                     |                |    | CYP107FS2 | 2571043114.c00011_T371DRA...regi<br>on1 | oligosaccharide |
|                                     |                |    | CYP105CN1 | 2571043118.c00015_T371DRA...regi<br>on1 | T1PKS           |
|                                     |                |    | CYP105CP2 | 2571043114.c00011_T371DRA...regi<br>on1 | oligosaccharide |
|                                     |                |    | CYP105BN4 | 2571043118.c00015_T371DRA...regi<br>on1 | T1PKS           |
|                                     |                |    | CYP107Q4  | 2571043120.c00017_T371DRA...regi<br>on1 | T1PKS           |
|                                     |                |    | CYP105G5  | 2571043120.c00017_T371DRA...regi<br>on1 | T1PKS           |
|                                     |                |    | CYP1051A1 | 2571043120.c00017_T371DRA...regi<br>on2 | Terpene         |
|                                     |                |    | CYP107EU1 | 2571043135.c00032_T371DRA...regi<br>on1 | NRPS-like       |
| <i>Salinispora arenicola</i> CNS296 | 256595652<br>7 | 19 | CYP105CH1 | 2565959858.c00001_T319DRA...regi<br>on2 | T1PKS           |

|  |  |  |                    |                                     |               |
|--|--|--|--------------------|-------------------------------------|---------------|
|  |  |  | CYP107Q4           | 2565959861.c00004_T319DRA...region1 | T1PKS         |
|  |  |  | CYP105G5           | 2565959861.c00004_T319DRA...region1 | T1PKS         |
|  |  |  | CYP1051A1          | 2565959861.c00004_T319DRA...region2 | Terpene       |
|  |  |  | CYP107AY2-fragment | 2565959862.c00005_T319DRA...region1 | NRPS          |
|  |  |  | CYP105CT1          | 2565959862.c00005_T319DRA...region2 | butyrolactone |
|  |  |  | CYP154M5           | 2565959862.c00005_T319DRA...region2 | butyrolactone |
|  |  |  | CYP208A12          | 2565959863.c00006_T319DRA...region2 | T1PKS         |
|  |  |  | CYP244A4           | 2565959865.c00008_T319DRA...region1 | Indole        |
|  |  |  | CYP245A7           | 2565959865.c00008_T319DRA...region1 | Indole        |
|  |  |  | CYP166A4           | 2565959867.c00010_T319DRA...region2 | T1PKS         |
|  |  |  | CYP105CP2          | 2565959868.c00011_T319DRA...region2 | NRPS          |

|                                       |            |   |           |                                     |        |
|---------------------------------------|------------|---|-----------|-------------------------------------|--------|
|                                       |            |   | CYP105CN1 | 2565959868.c00011_T319DRA...region2 | NRPS   |
|                                       |            |   | CYP107FS2 | 2565959868.c00011_T319DRA...region2 | NRPS   |
|                                       |            |   | CYP248A2  | 2565959868.c00011_T319DRA...region2 | NRPS   |
|                                       |            |   | CYP105W2  | 2565959868.c00011_T319DRA...region2 | NRPS   |
|                                       |            |   | CYP211C1  | 2565959873.c00016_T319DRA...region1 | T2PKS  |
|                                       |            |   | CYP247A7  | 2565959874.c00017_T319DRA...region1 | other  |
|                                       |            |   | CYP107EU1 | 2565959885.c00028_T319DRA...region1 | T1PKS  |
| <i>Salinispora pacifica</i> DSM 45549 | 2517434008 | 4 | CYP105AH4 | 2517434628.c00001_Salpac6...region1 | other  |
|                                       |            |   | CYP245A13 | 2517434628.c00001_Salpac6...region2 | Indole |
|                                       |            |   | CYP244A5  | 2517434628.c00001_Salpac6...region2 | Indole |
|                                       |            |   | CYP113E2  | 2517434628.c00001_Salpac6...region3 | T1PKS  |



|                                     |                |    |           |                                         |        |
|-------------------------------------|----------------|----|-----------|-----------------------------------------|--------|
| <i>Salinispora arenicola</i> CNY231 | 251828555<br>8 | 3  | CYP166A4  | 2518290717.c00001_C577DRA...regi<br>on1 | T1PKS  |
|                                     |                |    | CYP211C1  | 2518290720.c00004_C577DRA...regi<br>on1 | T2PKS  |
|                                     |                |    | CYP244A4  | 2518290721.c00005_C577DRA...regi<br>on1 | Indole |
| <i>Salinispora arenicola</i> CNS744 | 251828555<br>4 | 10 | CYP166A4  | 2518290334.c00002_C573DRA...regi<br>on1 | T1PKS  |
|                                     |                |    | CYP211C1  | 2518290335.c00003_C573DRA...regi<br>on4 | T2PKS  |
|                                     |                |    | CYP244A4  | 2518290338.c00006_C573DRA...regi<br>on1 | Indole |
|                                     |                |    | CYP245A7  | 2518290338.c00006_C573DRA...regi<br>on1 | Indole |
|                                     |                |    | CYP107AY2 | 2518290339.c00007_C573DRA...regi<br>on1 | NRPS   |
|                                     |                |    | CYP105CP2 | 2518290341.c00009_C573DRA...regi<br>on2 | NRPS   |
|                                     |                |    | CYP105CN1 | 2518290341.c00009_C573DRA...regi<br>on2 | NRPS   |
|                                     |                |    | CYP107FS2 | 2518290341.c00009_C573DRA...regi<br>on2 | NRPS   |

|                                     |            |    |           |                                     |                 |
|-------------------------------------|------------|----|-----------|-------------------------------------|-----------------|
|                                     |            |    | CYP248A2  | 2518290341.c00009_C573DRA...region2 | NRPS            |
|                                     |            |    | CYP105W2  | 2518290341.c00009_C573DRA...region2 | NRPS            |
| <i>Salinispora tropica</i> CNB-476  | 651717007  | 1  | CYP163B1  | 651717006.EF397502.region1          | NRPS            |
| <i>Salinispora arenicola</i> CNS342 | 2571042016 | 17 | CYP208A12 | 2571043981.c00002_T366DRA...region2 | T1PKS           |
|                                     |            |    | CYP211C1  | 2571043982.c00003_T366DRA...region4 | T2PKS           |
|                                     |            |    | CYP105W2  | 2571043986.c00007_T366DRA...region1 | oligosaccharide |
|                                     |            |    | CYP248A2  | 2571043986.c00007_T366DRA...region1 | oligosaccharide |
|                                     |            |    | CYP107FS2 | 2571043986.c00007_T366DRA...region1 | oligosaccharide |
|                                     |            |    | CYP105CN1 | 2571043986.c00007_T366DRA...region1 | oligosaccharide |
|                                     |            |    | CYP105CP2 | 2571043986.c00007_T366DRA...region1 | oligosaccharide |
|                                     |            |    | CYP244A4  | 2571043987.c00008_T366DRA...region1 | Indole          |
|                                     |            |    | CYP245A7  | 2571043987.c00008_T366DRA...region1 | Indole          |

|                                    |            |   |                    |                                     |         |
|------------------------------------|------------|---|--------------------|-------------------------------------|---------|
|                                    |            |   | CYP166A4           | 2571043988.c00009_T366DRA...region1 | T1PKS   |
|                                    |            |   | CYP154M5           | 2571043989.c00010_T366DRA...region1 | T1PKS   |
|                                    |            |   | CYP105CT1          | 2571043989.c00010_T366DRA...region1 | T1PKS   |
|                                    |            |   | CYP107AY2-fragment | 2571043989.c00010_T366DRA...region1 | T1PKS   |
|                                    |            |   | CYP107Q4           | 2571043991.c00012_T366DRA...region1 | T1PKS   |
|                                    |            |   | CYP105G5           | 2571043991.c00012_T366DRA...region1 | T1PKS   |
|                                    |            |   | CYP1051A1          | 2571043991.c00012_T366DRA...region2 | Terpene |
|                                    |            |   | CYP105CH1          | 2571043997.c00018_T366DRA...region1 | T1PKS   |
| <i>Salinispora pacifica</i> CNT796 | 2515154182 | 9 | CYP161N4           | 2515168768.c00002_B120DRA...region1 | T3PKS   |
|                                    |            |   | CYP2054A3          | 2515168768.c00002_B120DRA...region1 | T3PKS   |
|                                    |            |   | CYP107FH3          | 2515168768.c00002_B120DRA...region1 | T3PKS   |

|                                    |            |    |           |                                     |             |
|------------------------------------|------------|----|-----------|-------------------------------------|-------------|
|                                    |            |    | CYP107AW7 | 2515168769.c00003_B120DRA...region2 | Bacteriocin |
|                                    |            |    | CYP208A22 | 2515168792.c00026_B120DRA...region1 | T1PKS       |
|                                    |            |    | CYP244A13 | 2515168803.c00037_B120DRA...region1 | NRPS        |
|                                    |            |    | CYP107AY9 | 2515168803.c00037_B120DRA...region1 | NRPS        |
|                                    |            |    | CYP107NG1 | 2515168817.c00051_B120DRA...region1 | T2PKS       |
|                                    |            |    | CYP107E37 | 2515168821.c00055_B120DRA...region1 | T1PKS       |
| <i>Salinispora pacifica</i> CNR114 | 2515154178 | 11 | CYP107AW7 | 2515168496.c00002_B118DRA...region2 | Bacteriocin |
|                                    |            |    | CYP208A22 | 2515168497.c00003_B118DRA...region2 | T1PKS       |
|                                    |            |    | CYP161N4  | 2515168517.c00023_B118DRA...region1 | NRPS-like   |
|                                    |            |    | CYP2054A3 | 2515168517.c00023_B118DRA...region1 | NRPS-like   |
|                                    |            |    | CYP107FH3 | 2515168517.c00023_B118DRA...region1 | NRPS-like   |

|                                     |            |   |           |                                     |        |
|-------------------------------------|------------|---|-----------|-------------------------------------|--------|
|                                     |            |   | CYP1437C1 | 2515168521.c00027_B118DRA...region1 | NRPS   |
|                                     |            |   | CYP163A10 | 2515168528.c00034_B118DRA...region1 | NRPS   |
|                                     |            |   | CYP162K1  | 2515168528.c00034_B118DRA...region1 | NRPS   |
|                                     |            |   | CYP107AY9 | 2515168530.c00036_B118DRA...region1 | NRPS   |
|                                     |            |   | CYP294A4  | 2515168548.c00054_B118DRA...region1 | T1PKS  |
|                                     |            |   | CYP107E37 | 2515168552.c00058_B118DRA...region1 | T1PKS  |
| <i>Salinispora arenicola</i> CNY282 | 2521172655 | 7 | CYP211C1  | 2521193357.c00003_F585DRA...region1 | T2PKS  |
|                                     |            |   | CYP107AY2 | 2521193358.c00004_F585DRA...region1 | NRPS   |
|                                     |            |   | CYP105CT1 | 2521193358.c00004_F585DRA...region1 | NRPS   |
|                                     |            |   | CYP154M5  | 2521193358.c00004_F585DRA...region1 | NRPS   |
|                                     |            |   | CYP245A7  | 2521193362.c00008_F585DRA...region1 | Indole |

|                                     |            |    |           |                                     |        |
|-------------------------------------|------------|----|-----------|-------------------------------------|--------|
|                                     |            |    | CYP244A4  | 2521193362.c00008_F585DRA...region1 | Indole |
|                                     |            |    | CYP208A12 | 2521193364.c00010_F585DRA...region1 | T1PKS  |
| <i>Salinispora arenicola</i> CNT798 | 2515154186 | 21 | CYP244A4  | 2515169136.c00007_B103DRA...region1 | Indole |
|                                     |            |    | CYP245A7  | 2515169136.c00007_B103DRA...region1 | Indole |
|                                     |            |    | CYP105CP2 | 2515169137.c00008_B103DRA...region2 | NRPS   |
|                                     |            |    | CYP105CN1 | 2515169137.c00008_B103DRA...region2 | NRPS   |
|                                     |            |    | CYP107FS2 | 2515169137.c00008_B103DRA...region2 | NRPS   |
|                                     |            |    | CYP125G6  | 2515169137.c00008_B103DRA...region2 | NRPS   |
|                                     |            |    | CYP154M15 | 2515169137.c00008_B103DRA...region2 | NRPS   |
|                                     |            |    | CYP107AY2 | 2515169138.c00009_B103DRA...region1 | NRPS   |
|                                     |            |    | CYP208A12 | 2515169139.c00010_B103DRA...region1 | T1PKS  |

|  |  |  |            |                                     |                 |
|--|--|--|------------|-------------------------------------|-----------------|
|  |  |  | CYP105CH1  | 2515169141.c00012_B103DRA...region2 | T1PKS           |
|  |  |  | CYP107Q4   | 2515169143.c00014_B103DRA...region1 | T1PKS           |
|  |  |  | CYP105G5   | 2515169143.c00014_B103DRA...region1 | T1PKS           |
|  |  |  | CYP1051A1  | 2515169143.c00014_B103DRA...region2 | Terpene         |
|  |  |  | CYP211C1   | 2515169144.c00015_B103DRA...region1 | T2PKS           |
|  |  |  | CYP166A4   | 2515169145.c00016_B103DRA...region1 | T1PKS           |
|  |  |  | CYP107AX13 | 2515169146.c00017_B103DRA...region1 | ladderane       |
|  |  |  | CYP154M20  | 2515169150.c00021_B103DRA...region1 | oligosaccharide |
|  |  |  | CYP248A2   | 2515169150.c00021_B103DRA...region1 | oligosaccharide |
|  |  |  | CYP105W2   | 2515169150.c00021_B103DRA...region1 | oligosaccharide |
|  |  |  | CYP154M13  | 2515169150.c00021_B103DRA...region1 | oligosaccharide |

|                                    |            |    |           |                                     |                 |
|------------------------------------|------------|----|-----------|-------------------------------------|-----------------|
|                                    |            |    | CYP154M21 | 2515169150.c00021_B103DRA...region1 | oligosaccharide |
| <i>Salinispora pacifica</i> CNS860 | 2518285563 | 10 | CYP211C6  | 2518291047.c00006_C551DRA...region2 | T2PKS           |
|                                    |            |    | CYP244A5  | 2518291050.c00009_C551DRA...region1 | indole          |
|                                    |            |    | CYP107CT3 | 2518291051.c00010_C551DRA...region1 | NRPS            |
|                                    |            |    | CYP163B20 | 2518291054.c00013_C551DRA...region1 | NRPS            |
|                                    |            |    | CYP208A26 | 2518291055.c00014_C551DRA...region1 | T1PKS           |
|                                    |            |    | CYP154M16 | 2518291056.c00015_C551DRA...region1 | NRPS            |
|                                    |            |    | CYP208A21 | 2518291056.c00015_C551DRA...region1 | NRPS            |
|                                    |            |    | CYP107AW6 | 2518291056.c00015_C551DRA...region2 | Bacteriocin     |
|                                    |            |    | CYP107AY7 | 2518291057.c00016_C551DRA...region1 | terpene         |
|                                    |            |    | CYP162A8  | 2518291067.c00026_C551DRA...region1 | NRPS-like       |



|                                     |            |    |                    |                                     |                 |
|-------------------------------------|------------|----|--------------------|-------------------------------------|-----------------|
| <i>Salinispora arenicola</i> CNY694 | 2561511114 | 23 | CYP154M5           | 2561539735.c00002_T378DRA...region1 | T1PKS           |
|                                     |            |    | CYP105CT2          | 2561539735.c00002_T378DRA...region1 | T1PKS           |
|                                     |            |    | CYP211C1           | 2561539736.c00003_T378DRA...region2 | T2PKS           |
|                                     |            |    | CYP107AX-fragment8 | 2561539738.c00005_T378DRA...region1 | ladderane       |
|                                     |            |    | CYP166A4           | 2561539738.c00005_T378DRA...region2 | NRPS-like       |
|                                     |            |    | CYP208A12          | 2561539742.c00009_T378DRA...region1 | T1PKS           |
|                                     |            |    | CYP105W3           | 2561539744.c00011_T378DRA...region1 | oligosaccharide |
|                                     |            |    | CYP248A2           | 2561539744.c00011_T378DRA...region1 | oligosaccharide |
|                                     |            |    | CYP107FS2          | 2561539744.c00011_T378DRA...region1 | oligosaccharide |
|                                     |            |    | CYP105CN1          | 2561539744.c00011_T378DRA...region1 | oligosaccharide |
|                                     |            |    | CYP105CP2          | 2561539744.c00011_T378DRA...region1 | oligosaccharide |

|  |  |  |                   |                                     |             |
|--|--|--|-------------------|-------------------------------------|-------------|
|  |  |  | CYP1051A4         | 2561539746.c00013_T378DRA...region1 | Terpene     |
|  |  |  | CYP244A4          | 2561539748.c00015_T378DRA...region1 | Indole      |
|  |  |  | CYP245A7          | 2561539748.c00015_T378DRA...region1 | Indole      |
|  |  |  | CYP244A-fragment2 | 2561539752.c00019_T378DRA...region1 | NRPS        |
|  |  |  | CYP107EU2         | 2561539763.c00030_T378DRA...region1 | NRPS-like   |
|  |  |  | CYP107Q4          | 2561539765.c00032_T378DRA...region1 | T1PKS       |
|  |  |  | CYP105G7          | 2561539765.c00032_T378DRA...region1 | T1PKS       |
|  |  |  | CYP105CH2         | 2561539772.c00039_T378DRA...region1 | T1PKS       |
|  |  |  | CYP285A9-fragment | 2561539788.c00055_T378DRA...region1 | NRPS-like   |
|  |  |  | CYP285A9-fragment | 2561539788.c00055_T378DRA...region1 | NRPS-like   |
|  |  |  | CYP107AW7         | 2561539796.c00063_T378DRA...region1 | Bacteriocin |

|                                     |            |    |           |                                     |                 |
|-------------------------------------|------------|----|-----------|-------------------------------------|-----------------|
|                                     |            |    | CYP1198B2 | 2561539809.c00076_T378DRA...region1 | T1PKS           |
| <i>Salinispora arenicola</i> CNP193 | 2518285552 | 19 | CYP105CP2 | 2518290163.c00003_C571DRA...region2 | NRPS            |
|                                     |            |    | CYP105CN1 | 2518290163.c00003_C571DRA...region2 | NRPS            |
|                                     |            |    | CYP107FS2 | 2518290163.c00003_C571DRA...region2 | NRPS            |
|                                     |            |    | CYP125G6  | 2518290163.c00003_C571DRA...region2 | NRPS            |
|                                     |            |    | CYP154M15 | 2518290163.c00003_C571DRA...region2 | NRPS            |
|                                     |            |    | CYP154M20 | 2518290163.c00003_C571DRA...region3 | oligosaccharide |
|                                     |            |    | CYP248A2  | 2518290163.c00003_C571DRA...region3 | oligosaccharide |
|                                     |            |    | CYP105W2  | 2518290163.c00003_C571DRA...region3 | oligosaccharide |
|                                     |            |    | CYP154M13 | 2518290163.c00003_C571DRA...region3 | oligosaccharide |
|                                     |            |    | CYP154M21 | 2518290163.c00003_C571DRA...region3 | oligosaccharide |

|                                    |            |   |           |                                     |             |
|------------------------------------|------------|---|-----------|-------------------------------------|-------------|
|                                    |            |   | CYP208A12 | 2518290164.c00004_C571DRA...region1 | T1PKS       |
|                                    |            |   | CYP245A7  | 2518290166.c00006_C571DRA...region1 | Indole      |
|                                    |            |   | CYP244A4  | 2518290166.c00006_C571DRA...region1 | Indole      |
|                                    |            |   | CYP166A4  | 2518290171.c00011_C571DRA...region1 | T1PKS       |
|                                    |            |   | CYP1051A1 | 2518290172.c00012_C571DRA...region1 | Terpene     |
|                                    |            |   | CYP105G5  | 2518290172.c00012_C571DRA...region2 | T1PKS       |
|                                    |            |   | CYP107Q4  | 2518290172.c00012_C571DRA...region2 | T1PKS       |
|                                    |            |   | CYP107AY2 | 2518290192.c00032_C571DRA...region1 | NRPS        |
|                                    |            |   | CYP163B16 | 2518290193.c00033_C571DRA...region1 | NRPS        |
| <i>Salinispora pacifica</i> CNS103 | 2515154129 | 5 | CYP107AW7 | 2515165134.c00004_B117DRA...region2 | Bacteriocin |
|                                    |            |   | CYP107FH3 | 2515165152.c00022_B117DRA...region1 | NRPS-like   |

|                                     |            |    |           |                                     |           |
|-------------------------------------|------------|----|-----------|-------------------------------------|-----------|
|                                     |            |    | CYP161N4  | 2515165152.c00022_B117DRA...region1 | NRPS-like |
|                                     |            |    | CYP107AY9 | 2515165152.c00022_B117DRA...region1 | NRPS-like |
|                                     |            |    | CYP107E37 | 2515165153.c00023_B117DRA...region1 | terpene   |
| <i>Salinispora arenicola</i> CNP105 | 2518285551 | 1  | CYP208A12 | 2518290094.c00003_C572DRA...region2 | T1PKS     |
| <i>Salinispora arenicola</i> CNX482 | 2515154137 | 16 | CYP245A7  | 2515165687.c00004_B168DRA...region2 | Indole    |
|                                     |            |    | CYP244A4  | 2515165687.c00004_B168DRA...region2 | Indole    |
|                                     |            |    | CYP208A12 | 2515165688.c00005_B168DRA...region1 | T1PKS     |
|                                     |            |    | CYP154M5  | 2515165690.c00007_B168DRA...region1 | T1PKS     |
|                                     |            |    | CYP105CT1 | 2515165690.c00007_B168DRA...region1 | T1PKS     |
|                                     |            |    | CYP107Q4  | 2515165694.c00011_B168DRA...region1 | T1PKS     |
|                                     |            |    | CYP105G5  | 2515165694.c00011_B168DRA...region1 | T1PKS     |

|                                     |            |    |                    |                                     |                 |
|-------------------------------------|------------|----|--------------------|-------------------------------------|-----------------|
|                                     |            |    | CYP1051A1          | 2515165694.c00011_B168DRA...region2 | Terpene         |
|                                     |            |    | CYP211C1           | 2515165696.c00013_B168DRA...region1 | T2PKS           |
|                                     |            |    | CYP107FS2          | 2515165698.c00015_B168DRA...region1 | NRPS            |
|                                     |            |    | CYP105CN1          | 2515165698.c00015_B168DRA...region1 | NRPS            |
|                                     |            |    | CYP105CP2          | 2515165698.c00015_B168DRA...region1 | NRPS            |
|                                     |            |    | CYP105W2           | 2515165699.c00016_B168DRA...region1 | oligosaccharide |
|                                     |            |    | CYP248A2           | 2515165699.c00016_B168DRA...region1 | oligosaccharide |
|                                     |            |    | CYP166A4           | 2515165701.c00018_B168DRA...region1 | T1PKS           |
|                                     |            |    | CYP107AY2-fragment | 2515165702.c00019_B168DRA...region1 | NRPS            |
| <i>Salinispora arenicola</i> CNS299 | 2524614529 | 18 | CYP211C1           | 2524618012.c00001_H279DRA...region4 | T2PKS           |
|                                     |            |    | CYP208A12          | 2524618014.c00003_H279DRA...region2 | T1PKS           |

|  |  |  |           |                                     |                 |
|--|--|--|-----------|-------------------------------------|-----------------|
|  |  |  | CYP105W2  | 2524618017.c00006_H279DRA...region1 | oligosaccharide |
|  |  |  | CYP248A2  | 2524618017.c00006_H279DRA...region1 | oligosaccharide |
|  |  |  | CYP107FS2 | 2524618017.c00006_H279DRA...region1 | oligosaccharide |
|  |  |  | CYP105CN1 | 2524618017.c00006_H279DRA...region1 | oligosaccharide |
|  |  |  | CYP105CP2 | 2524618017.c00006_H279DRA...region1 | oligosaccharide |
|  |  |  | CYP244A4  | 2524618019.c00008_H279DRA...region1 | Indole          |
|  |  |  | CYP245A7  | 2524618019.c00008_H279DRA...region1 | Indole          |
|  |  |  | CYP166A4  | 2524618020.c00009_H279DRA...region1 | NRPS-like       |
|  |  |  | CYP1051A1 | 2524618024.c00013_H279DRA...region1 | Terpene         |
|  |  |  | CYP105G5  | 2524618024.c00013_H279DRA...region2 | T1PKS           |
|  |  |  | CYP107Q4  | 2524618024.c00013_H279DRA...region2 | T1PKS           |

|                                    |            |    |                    |                                     |             |
|------------------------------------|------------|----|--------------------|-------------------------------------|-------------|
|                                    |            |    | CYP105CT1          | 2524618025.c00014_H279DRA...region1 | terpene     |
|                                    |            |    | CYP154M5           | 2524618025.c00014_H279DRA...region1 | terpene     |
|                                    |            |    | CYP107AY2-fragment | 2524618030.c00019_H279DRA...region1 | NRPS        |
|                                    |            |    | CYP247A7           | 2524618033.c00022_H279DRA...region1 | NRPS        |
|                                    |            |    | CYP105CH1          | 2524618035.c00024_H279DRA...region1 | T1PKS       |
| <i>Salinispora pacifica</i> CNT003 | 2515154126 | 10 | CYP208A22          | 2515164822.c00005_B167DRA...region1 | T1PKS       |
|                                    |            |    | CYP107AW7          | 2515164823.c00006_B167DRA...region1 | Bacteriocin |
|                                    |            |    | CYP107FH3          | 2515164831.c00014_B167DRA...region1 | NRPS-like   |
|                                    |            |    | CYP2054A3          | 2515164831.c00014_B167DRA...region1 | NRPS-like   |
|                                    |            |    | CYP161N4           | 2515164831.c00014_B167DRA...region1 | NRPS-like   |
|                                    |            |    | CYP107AY9          | 2515164850.c00033_B167DRA...region1 | NRPS        |



|                                    |            |   |           |                                     |       |
|------------------------------------|------------|---|-----------|-------------------------------------|-------|
|                                    |            |   | CYP162B3  | 2515164854.c00037_B167DRA...region1 | NRPS  |
|                                    |            |   | CYP162G1  | 2515164867.c00050_B167DRA...region1 | NRPS  |
|                                    |            |   | CYP107E37 | 2515164880.c00063_B167DRA...region1 | T1PKS |
|                                    |            |   | CYP107FH4 | 2515164904.c00087_B167DRA...region1 | T1PKS |
| <i>Salinispora pacifica</i> CNT569 | 2515154124 | 7 | CYP211C5  | 2515164709.c00001_B116DRA...region2 | T1PKS |
|                                    |            |   | CYP125G4  | 2515164709.c00001_B116DRA...region4 | T2PKS |
|                                    |            |   | CYP1004A3 | 2515164716.c00008_B116DRA...region1 | other |
|                                    |            |   | CYP1004B4 | 2515164716.c00008_B116DRA...region1 | other |
|                                    |            |   | CYP113E2  | 2515164716.c00008_B116DRA...region1 | other |
|                                    |            |   | CYP163B18 | 2515164716.c00008_B116DRA...region1 | other |
|                                    |            |   | CYP107AY3 | 2515164718.c00010_B116DRA...region2 | NRPS  |

|                                     |            |    |           |                                     |         |
|-------------------------------------|------------|----|-----------|-------------------------------------|---------|
| <i>Salinispora arenicola</i> CNH643 | 2561511037 | 22 | CYP107Q4  | 2561515316.c00001_T339DRA...region1 | T1PKS   |
|                                     |            |    | CYP105G5  | 2561515316.c00001_T339DRA...region1 | T1PKS   |
|                                     |            |    | CYP1051A1 | 2561515316.c00001_T339DRA...region2 | Terpene |
|                                     |            |    | CYP211C1  | 2561515317.c00002_T339DRA...region5 | T2PKS   |
|                                     |            |    | CYP208A12 | 2561515318.c00003_T339DRA...region1 | T1PKS   |
|                                     |            |    | CYP244A4  | 2561515323.c00008_T339DRA...region1 | Indole  |
|                                     |            |    | CYP245A7  | 2561515323.c00008_T339DRA...region1 | Indole  |
|                                     |            |    | CYP105CP2 | 2561515324.c00009_T339DRA...region2 | NRPS    |
|                                     |            |    | CYP105CN1 | 2561515324.c00009_T339DRA...region2 | NRPS    |
|                                     |            |    | CYP107FS2 | 2561515324.c00009_T339DRA...region2 | NRPS    |
|                                     |            |    | CYP125G6  | 2561515324.c00009_T339DRA...region2 | NRPS    |

|  |  |  |             |                                     |           |
|--|--|--|-------------|-------------------------------------|-----------|
|  |  |  | CYP154M15   | 2561515324.c00009_T339DRA...region2 | NRPS      |
|  |  |  | CYP166A4    | 2561515326.c00011_T339DRA...region1 | T1PKS     |
|  |  |  | CYP107AX14P | 2561515329.c00014_T339DRA...region1 | ladderane |
|  |  |  | CYP107EU1   | 2561515333.c00018_T339DRA...region2 | NRPS-like |
|  |  |  | CYP162P1    | 2561515337.c00022_T339DRA...region1 | NRPS      |
|  |  |  | CYP154M21   | 2561515338.c00023_T339DRA...region1 | NRPS      |
|  |  |  | CYP154M13   | 2561515338.c00023_T339DRA...region1 | NRPS      |
|  |  |  | CYP105W2    | 2561515338.c00023_T339DRA...region1 | NRPS      |
|  |  |  | CYP248A2    | 2561515338.c00023_T339DRA...region1 | NRPS      |
|  |  |  | CYP154M20   | 2561515338.c00023_T339DRA...region1 | NRPS      |
|  |  |  | CYP107AY13  | 2561515348.c00033_T339DRA...region1 | NRPS      |

|                                     |            |    |                    |                                     |           |
|-------------------------------------|------------|----|--------------------|-------------------------------------|-----------|
| <i>Salinispora arenicola</i> CNH962 | 2519103193 | 17 | CYP211C1           | 2519123975.c00005_F582DRA...region2 | T2PKS     |
|                                     |            |    | CYP244A4           | 2519123976.c00006_F582DRA...region1 | Indole    |
|                                     |            |    | CYP245A7           | 2519123976.c00006_F582DRA...region1 | Indole    |
|                                     |            |    | CYP107AX-fragment9 | 2519123978.c00008_F582DRA...region1 | ladderane |
|                                     |            |    | CYP166A4           | 2519123978.c00008_F582DRA...region2 | T1PKS     |
|                                     |            |    | CYP154M14          | 2519123979.c00009_F582DRA...region2 | NRPS      |
|                                     |            |    | CYP107FS2          | 2519123985.c00015_F582DRA...region1 | NRPS      |
|                                     |            |    | CYP105CN1          | 2519123985.c00015_F582DRA...region1 | NRPS      |
|                                     |            |    | CYP105CP2          | 2519123985.c00015_F582DRA...region1 | NRPS      |
|                                     |            |    | CYP107AY2          | 2519123992.c00022_F582DRA...region1 | NRPS      |
|                                     |            |    | CYP208A12          | 2519123993.c00023_F582DRA...region1 | T1PKS     |

|                                     |            |    |           |                                     |                 |
|-------------------------------------|------------|----|-----------|-------------------------------------|-----------------|
|                                     |            |    | CYP107Q4  | 2519123996.c00026_F582DRA...region1 | T1PKS           |
|                                     |            |    | CYP105G5  | 2519123996.c00026_F582DRA...region1 | T1PKS           |
|                                     |            |    | CYP1051A1 | 2519123996.c00026_F582DRA...region2 | Terpene         |
|                                     |            |    | CYP105CT1 | 2519124007.c00037_F582DRA...region1 | Terpene         |
|                                     |            |    | CYP105W2  | 2519124009.c00039_F582DRA...region1 | oligosaccharide |
|                                     |            |    | CYP248A2  | 2519124009.c00039_F582DRA...region1 | oligosaccharide |
| <i>Salinispora arenicola</i> CNX481 | 2518285555 | 18 | CYP211C1  | 2518290422.c00001_C574DRA...region1 | T2PKS           |
|                                     |            |    | CYP245A7  | 2518290425.c00004_C574DRA...region2 | Indole          |
|                                     |            |    | CYP244A4  | 2518290425.c00004_C574DRA...region2 | Indole          |
|                                     |            |    | CYP166A4  | 2518290426.c00005_C574DRA...region1 | T1PKS           |
|                                     |            |    | CYP105CP2 | 2518290430.c00009_C574DRA...region2 | NRPS            |

|  |  |  |                    |                                     |                 |
|--|--|--|--------------------|-------------------------------------|-----------------|
|  |  |  | CYP105CN1          | 2518290430.c00009_C574DRA...region2 | NRPS            |
|  |  |  | CYP107FS2          | 2518290430.c00009_C574DRA...region2 | NRPS            |
|  |  |  | CYP1051A1          | 2518290431.c00010_C574DRA...region1 | Terpene         |
|  |  |  | CYP105G5           | 2518290431.c00010_C574DRA...region2 | T1PKS           |
|  |  |  | CYP107Q4           | 2518290431.c00010_C574DRA...region2 | T1PKS           |
|  |  |  | CYP208A12          | 2518290433.c00012_C574DRA...region1 | T1PKS           |
|  |  |  | CYP107AY2          | 2518290440.c00019_C574DRA...region1 | NRPS            |
|  |  |  | CYP105CH2-fragment | 2518290443.c00022_C574DRA...region1 | NRPS            |
|  |  |  | CYP105CH1-fragment | 2518290443.c00022_C574DRA...region1 | NRPS            |
|  |  |  | CYP248A2           | 2518290449.c00028_C574DRA...region1 | oligosaccharide |
|  |  |  | CYP105W2           | 2518290449.c00028_C574DRA...region1 | oligosaccharide |

|                                     |            |    |           |                                     |               |
|-------------------------------------|------------|----|-----------|-------------------------------------|---------------|
|                                     |            |    | CYP154M5  | 2518290452.c00031_C574DRA...region1 | T1PKS         |
|                                     |            |    | CYP105CT1 | 2518290452.c00031_C574DRA...region1 | T1PKS         |
| <i>Salinispora pacifica</i> CNT148  | 2517572145 | 2  | CYP107AW9 | 2517595798.c00002_B159DRA...region2 | Bacteriocin   |
|                                     |            |    | CYP1223A5 | 2517595810.c00014_B159DRA...region1 | lanthipeptide |
| <i>Salinispora arenicola</i> CNH713 | 2571042007 | 22 | CYP211C1  | 2571042957.c00001_T341DRA...region3 | T2PKS         |
|                                     |            |    | CYP166A4  | 2571042957.c00001_T341DRA...region7 | NRPS-like     |
|                                     |            |    | CYP105CH1 | 2571042958.c00002_T341DRA...region1 | T1PKS         |
|                                     |            |    | CYP162P1  | 2571042958.c00002_T341DRA...region3 | NRPS          |
|                                     |            |    | CYP208A12 | 2571042962.c00006_T341DRA...region1 | T1PKS         |
|                                     |            |    | CYP105CP2 | 2571042963.c00007_T341DRA...region2 | NRPS          |
|                                     |            |    | CYP105CN1 | 2571042963.c00007_T341DRA...region2 | NRPS          |

|  |  |  |           |                                     |                 |
|--|--|--|-----------|-------------------------------------|-----------------|
|  |  |  | CYP107FS2 | 2571042963.c00007_T341DRA...region2 | NRPS            |
|  |  |  | CYP125G6  | 2571042963.c00007_T341DRA...region2 | NRPS            |
|  |  |  | CYP154M15 | 2571042963.c00007_T341DRA...region2 | NRPS            |
|  |  |  | CYP154M20 | 2571042963.c00007_T341DRA...region3 | oligosaccharide |
|  |  |  | CYP248A2  | 2571042963.c00007_T341DRA...region3 | oligosaccharide |
|  |  |  | CYP105W2  | 2571042963.c00007_T341DRA...region3 | oligosaccharide |
|  |  |  | CYP154M13 | 2571042963.c00007_T341DRA...region3 | oligosaccharide |
|  |  |  | CYP154M21 | 2571042963.c00007_T341DRA...region3 | oligosaccharide |
|  |  |  | CYP107Q4  | 2571042964.c00008_T341DRA...region1 | T1PKS           |
|  |  |  | CYP105G5  | 2571042964.c00008_T341DRA...region1 | T1PKS           |
|  |  |  | CYP1051A1 | 2571042964.c00008_T341DRA...region2 | Terpene         |



|                                     |            |    |                    |                                     |           |
|-------------------------------------|------------|----|--------------------|-------------------------------------|-----------|
|                                     |            |    | CYP244A4           | 2571042965.c00009_T341DRA...region1 | Indole    |
|                                     |            |    | CYP245A7           | 2571042965.c00009_T341DRA...region1 | Indole    |
|                                     |            |    | CYP107EU1          | 2571042966.c00010_T341DRA...region1 | T1PKS     |
|                                     |            |    | CYP107AY2          | 2571042967.c00011_T341DRA...region1 | NRPS      |
| <i>Salinispora arenicola</i> CNH963 | 2524023246 | 17 | CYP107AX-fragment9 | 2524041079.c00004_H278DRA...region1 | ladderane |
|                                     |            |    | CYP166A4           | 2524041079.c00004_H278DRA...region2 | NRPS-like |
|                                     |            |    | CYP107Q4           | 2524041079.c00004_H278DRA...region2 | NRPS-like |
|                                     |            |    | CYP105G5           | 2524041079.c00004_H278DRA...region2 | NRPS-like |
|                                     |            |    | CYP1051A1          | 2524041079.c00004_H278DRA...region3 | Terpene   |
|                                     |            |    | CYP211C1           | 2524041081.c00006_H278DRA...region1 | T2PKS     |
|                                     |            |    | CYP245A7           | 2524041083.c00008_H278DRA...region1 | Indole    |

|                                    |            |    |           |                                     |                 |
|------------------------------------|------------|----|-----------|-------------------------------------|-----------------|
|                                    |            |    | CYP244A4  | 2524041083.c00008_H278DRA...region1 | Indole          |
|                                    |            |    | CYP154M14 | 2524041084.c00009_H278DRA...region2 | NRPS            |
|                                    |            |    | CYP105CP2 | 2524041089.c00014_H278DRA...region2 | NRPS            |
|                                    |            |    | CYP105CN1 | 2524041089.c00014_H278DRA...region2 | NRPS            |
|                                    |            |    | CYP107FS2 | 2524041089.c00014_H278DRA...region2 | NRPS            |
|                                    |            |    | CYP208A12 | 2524041096.c00021_H278DRA...region1 | T1PKS           |
|                                    |            |    | CYP107AY2 | 2524041100.c00025_H278DRA...region1 | NRPS            |
|                                    |            |    | CYP105CT1 | 2524041114.c00039_H278DRA...region1 | Terpene         |
|                                    |            |    | CYP248A2  | 2524041115.c00040_H278DRA...region1 | oligosaccharide |
|                                    |            |    | CYP105W2  | 2524041115.c00040_H278DRA...region1 | oligosaccharide |
| <i>Salinispora pacifica</i> CNS863 | 2517572156 | 11 | CYP162A8  | 2517596463.c00001_C552DRA...region2 | NRPS-like       |

|                                   |                |    |           |                                     |             |
|-----------------------------------|----------------|----|-----------|-------------------------------------|-------------|
|                                   |                |    | CYP211C6  | 2517596468.c00006_C552DRA...region2 | T2PKS       |
|                                   |                |    | CYP245A11 | 2517596470.c00008_C552DRA...region1 | indole      |
|                                   |                |    | CYP244A5  | 2517596470.c00008_C552DRA...region1 | indole      |
|                                   |                |    | CYP208A26 | 2517596472.c00010_C552DRA...region1 | T1PKS       |
|                                   |                |    | CYP107AW6 | 2517596477.c00015_C552DRA...region1 | Bacteriocin |
|                                   |                |    | CYP163B20 | 2517596484.c00022_C552DRA...region1 | NRPS        |
|                                   |                |    | CYP107AY7 | 2517596488.c00026_C552DRA...region1 | terpene     |
|                                   |                |    | CYP208A21 | 2517596493.c00031_C552DRA...region1 | NRPS        |
|                                   |                |    | CYP154M16 | 2517596493.c00031_C552DRA...region1 | NRPS        |
|                                   |                |    | CYP107CT3 | 2517596497.c00035_C552DRA...region1 | NRPS        |
| <i>Salinispora tropica</i> CNB476 | 251757221<br>1 | 10 | CYP163B1  | 2517600244.c00001_B098DRA...region1 | NRPS        |

|                                   |            |    |           |                                     |             |
|-----------------------------------|------------|----|-----------|-------------------------------------|-------------|
|                                   |            |    | CYP154M1  | 2517600245.c00002_B098DRA...region1 | NRPS        |
|                                   |            |    | CYP208A4  | 2517600245.c00002_B098DRA...region1 | NRPS        |
|                                   |            |    | CYP211C1  | 2517600245.c00002_B098DRA...region3 | T2PKS       |
|                                   |            |    | CYP107AW1 | 2517600246.c00003_B098DRA...region2 | Bacteriocin |
|                                   |            |    | CYP1004B1 | 2517600258.c00015_B098DRA...region1 | NRPS        |
|                                   |            |    | CYP1004A1 | 2517600258.c00015_B098DRA...region1 | NRPS        |
|                                   |            |    | CYP125G1  | 2517600258.c00015_B098DRA...region1 | NRPS        |
|                                   |            |    | CYP107AY1 | 2517600260.c00017_B098DRA...region1 | terpene     |
|                                   |            |    | CYP107E3  | 2517600285.c00042_B098DRA...region1 | T1PKS       |
| <i>Salinispora tropica</i> CNT261 | 2524614530 | 13 | CYP163B1  | 2524618075.c00001_H301DRA...region1 | NRPS        |
|                                   |            |    | CYP107NH1 | 2524618075.c00001_H301DRA...region3 | NRPS        |

|  |  |  |           |                                     |             |
|--|--|--|-----------|-------------------------------------|-------------|
|  |  |  | CYP247A8  | 2524618075.c00001_H301DRA...region3 | NRPS        |
|  |  |  | CYP107Z27 | 2524618075.c00001_H301DRA...region3 | NRPS        |
|  |  |  | CYP154M1  | 2524618077.c00003_H301DRA...region1 | NRPS        |
|  |  |  | CYP208A4  | 2524618077.c00003_H301DRA...region1 | NRPS        |
|  |  |  | CYP211C1  | 2524618077.c00003_H301DRA...region3 | T2PKS       |
|  |  |  | CYP107AW1 | 2524618079.c00005_H301DRA...region1 | Bacteriocin |
|  |  |  | CYP107AY1 | 2524618092.c00018_H301DRA...region1 | NRPS        |
|  |  |  | CYP1004B1 | 2524618096.c00022_H301DRA...region1 | NRPS        |
|  |  |  | CYP1004A1 | 2524618096.c00022_H301DRA...region1 | NRPS        |
|  |  |  | CYP125G1  | 2524618096.c00022_H301DRA...region1 | NRPS        |
|  |  |  | CYP107E3  | 2524618115.c00041_H301DRA...region1 | T1PKS       |

|                                   |            |    |           |                                     |             |
|-----------------------------------|------------|----|-----------|-------------------------------------|-------------|
| <i>Salinispora tropica</i> CNR699 | 2518645624 | 11 | CYP107AY1 | 2518683438.c00001_C589DRA...region1 | terpene     |
|                                   |            |    | CYP163B1  | 2518683439.c00002_C589DRA...region1 | NRPS        |
|                                   |            |    | CYP154M1  | 2518683440.c00003_C589DRA...region2 | NRPS        |
|                                   |            |    | CYP208A4  | 2518683440.c00003_C589DRA...region2 | NRPS        |
|                                   |            |    | CYP211C1  | 2518683440.c00003_C589DRA...region4 | T2PKS       |
|                                   |            |    | CYP107AW1 | 2518683441.c00004_C589DRA...region2 | Bacteriocin |
|                                   |            |    | CYP113E1  | 2518683455.c00018_C589DRA...region1 | T1PKS       |
|                                   |            |    | CYP1004B1 | 2518683459.c00022_C589DRA...region1 | NRPS        |
|                                   |            |    | CYP1004A1 | 2518683459.c00022_C589DRA...region1 | NRPS        |
|                                   |            |    | CYP125G1  | 2518683459.c00022_C589DRA...region1 | NRPS        |
|                                   |            |    | CYP107E3  | 2518683471.c00034_C589DRA...region1 | T1PKS       |

|                                     |            |    |           |                                     |               |
|-------------------------------------|------------|----|-----------|-------------------------------------|---------------|
| <i>Salinispora arenicola</i> CNQ748 | 2515154180 | 15 | CYP107AY2 | 2515168620.c00002_B106DRA...region1 | NRPS          |
|                                     |            |    | CYP105CT1 | 2515168620.c00002_B106DRA...region1 | NRPS          |
|                                     |            |    | CYP154M5  | 2515168620.c00002_B106DRA...region1 | NRPS          |
|                                     |            |    | CYP105CP2 | 2515168622.c00004_B106DRA...region2 | lanthipeptide |
|                                     |            |    | CYP105CN1 | 2515168622.c00004_B106DRA...region2 | lanthipeptide |
|                                     |            |    | CYP107FS2 | 2515168622.c00004_B106DRA...region2 | lanthipeptide |
|                                     |            |    | CYP248A2  | 2515168622.c00004_B106DRA...region2 | lanthipeptide |
|                                     |            |    | CYP105W2  | 2515168622.c00004_B106DRA...region2 | lanthipeptide |
|                                     |            |    | CYP211C1  | 2515168625.c00007_B106DRA...region1 | T2PKS         |
|                                     |            |    | CYP245A7  | 2515168627.c00009_B106DRA...region1 | Indole        |
|                                     |            |    | CYP244A4  | 2515168627.c00009_B106DRA...region1 | Indole        |

|                                                 |            |    |           |                                     |           |
|-------------------------------------------------|------------|----|-----------|-------------------------------------|-----------|
|                                                 |            |    | CYP208A12 | 2515168631.c00013_B106DRA...region1 | T1PKS     |
|                                                 |            |    | CYP107Q4  | 2515168634.c00016_B106DRA...region1 | T1PKS     |
|                                                 |            |    | CYP105G5  | 2515168634.c00016_B106DRA...region1 | T1PKS     |
|                                                 |            |    | CYP1051A1 | 2515168634.c00016_B106DRA...region2 | Terpene   |
| <i>Salinispora arenicola</i> CNS-991, DSM 45545 | 2516143022 | 12 | CYP154M21 | 2516144862.scaffold1.region2        | NRPS      |
|                                                 |            |    | CYP154M13 | 2516144862.scaffold1.region2        | NRPS      |
|                                                 |            |    | CYP105W2  | 2516144862.scaffold1.region2        | NRPS      |
|                                                 |            |    | CYP248A2  | 2516144862.scaffold1.region2        | NRPS      |
|                                                 |            |    | CYP154M20 | 2516144862.scaffold1.region2        | NRPS      |
|                                                 |            |    | CYP154M15 | 2516144862.scaffold1.region3        | ladderane |
|                                                 |            |    | CYP125G6  | 2516144862.scaffold1.region3        | ladderane |
|                                                 |            |    | CYP107FS2 | 2516144862.scaffold1.region3        | ladderane |
|                                                 |            |    | CYP105CN1 | 2516144862.scaffold1.region3        | ladderane |
|                                                 |            |    | CYP105CP2 | 2516144862.scaffold1.region3        | ladderane |
|                                                 |            |    | CYP244A4  | 2516144862.scaffold1.region5        | Indole    |
|                                                 |            |    | CYP245A7  | 2516144862.scaffold1.region5        | Indole    |



|                                       |            |    |           |                                     |             |
|---------------------------------------|------------|----|-----------|-------------------------------------|-------------|
| <i>Salinispora pacifica</i> CNT854    | 2515154170 | 10 | CYP154AJ2 | 2515167898.c00002_B115DRA...region2 | LAP         |
|                                       |            |    | CYP211C9  | 2515167898.c00002_B115DRA...region3 | T2PKS       |
|                                       |            |    | CYP107AW6 | 2515167899.c00003_B115DRA...region1 | Bacteriocin |
|                                       |            |    | CYP245A11 | 2515167899.c00003_B115DRA...region2 | indole      |
|                                       |            |    | CYP244A5  | 2515167899.c00003_B115DRA...region2 | indole      |
|                                       |            |    | CYP208A27 | 2515167909.c00013_B115DRA...region1 | T1PKS       |
|                                       |            |    | CYP107FH3 | 2515167910.c00014_B115DRA...region1 | NRPS-like   |
|                                       |            |    | CYP2054A3 | 2515167910.c00014_B115DRA...region1 | NRPS-like   |
|                                       |            |    | CYP161N4  | 2515167910.c00014_B115DRA...region1 | NRPS-like   |
|                                       |            |    | CYP1196A2 | 2515167921.c00025_B115DRA...region1 | NRPS        |
| <i>Salinispora pacifica</i> DSM 45543 | 2517572194 | 11 | CYP162A8  | 2517598672.c00001_SALPACD...region2 | NRPS-like   |

|                                     |            |    |           |                                      |                  |
|-------------------------------------|------------|----|-----------|--------------------------------------|------------------|
|                                     |            |    | CYP244A5  | 2517598672.c00001_SALPACD...region7  | NRPS             |
|                                     |            |    | CYP245A11 | 2517598672.c00001_SALPACD...region7  | NRPS             |
|                                     |            |    | CYP107AW6 | 2517598672.c00001_SALPACD...region8  | Bacteriocin      |
|                                     |            |    | CYP208A21 | 2517598672.c00001_SALPACD...region9  | NRPS             |
|                                     |            |    | CYP154M16 | 2517598672.c00001_SALPACD...region9  | NRPS             |
|                                     |            |    | CYP211C6  | 2517598672.c00001_SALPACD...region13 | T2PKS            |
|                                     |            |    | CYP208A26 | 2517598672.c00001_SALPACD...region15 | T1PKS            |
|                                     |            |    | CYP163B20 | 2517598672.c00001_SALPACD...region20 | transAT-PKS-like |
|                                     |            |    | CYP107CT3 | 2517598672.c00001_SALPACD...region21 | NRPS             |
|                                     |            |    | CYP107AY7 | 2517598672.c00001_SALPACD...region24 | NRPS             |
| <i>Salinispora arenicola</i> CNY260 | 2518285560 | 17 | CYP107Q4  | 2518290865.c00001_C579DRA...region1  | T1PKS            |

|  |  |  |           |                                     |                 |
|--|--|--|-----------|-------------------------------------|-----------------|
|  |  |  | CYP105G5  | 2518290865.c00001_C579DRA...region1 | T1PKS           |
|  |  |  | CYP1051A1 | 2518290865.c00001_C579DRA...region2 | Terpene         |
|  |  |  | CYP211C1  | 2518290867.c00003_C579DRA...region5 | T2PKS           |
|  |  |  | CYP208A12 | 2518290870.c00006_C579DRA...region2 | T1PKS           |
|  |  |  | CYP105W2  | 2518290872.c00008_C579DRA...region1 | oligosaccharide |
|  |  |  | CYP248A2  | 2518290872.c00008_C579DRA...region1 | oligosaccharide |
|  |  |  | CYP107FS2 | 2518290872.c00008_C579DRA...region1 | oligosaccharide |
|  |  |  | CYP105CN1 | 2518290872.c00008_C579DRA...region1 | oligosaccharide |
|  |  |  | CYP105CP2 | 2518290872.c00008_C579DRA...region1 | oligosaccharide |
|  |  |  | CYP107AY2 | 2518290873.c00009_C579DRA...region1 | NRPS            |
|  |  |  | CYP105CT1 | 2518290873.c00009_C579DRA...region1 | NRPS            |

|                                     |            |    |            |                                     |           |
|-------------------------------------|------------|----|------------|-------------------------------------|-----------|
|                                     |            |    | CYP154M5   | 2518290873.c00009_C579DRA...region1 | NRPS      |
|                                     |            |    | CYP166A4   | 2518290874.c00010_C579DRA...region1 | T1PKS     |
|                                     |            |    | CYP245A7   | 2518290875.c00011_C579DRA...region2 | Indole    |
|                                     |            |    | CYP244A4   | 2518290875.c00011_C579DRA...region2 | Indole    |
|                                     |            |    | CYP105CH1  | 2518290883.c00019_C579DRA...region1 | T1PKS     |
| <i>Salinispora arenicola</i> CNT799 | 2526164509 | 23 | CYP208A12  | 2526165619.c00001_K389DRA...region2 | T1PKS     |
|                                     |            |    | CYP105CH1  | 2526165620.c00002_K389DRA...region2 | T1PKS     |
|                                     |            |    | CYP107AX13 | 2526165621.c00003_K389DRA...region4 | ladderane |
|                                     |            |    | CYP166A4   | 2526165621.c00003_K389DRA...region5 | NRPS-like |
|                                     |            |    | CYP105CP2  | 2526165625.c00007_K389DRA...region2 | NRPS      |
|                                     |            |    | CYP105CN1  | 2526165625.c00007_K389DRA...region2 | NRPS      |

|  |  |  |           |                                     |                 |
|--|--|--|-----------|-------------------------------------|-----------------|
|  |  |  | CYP107FS2 | 2526165625.c00007_K389DRA...region2 | NRPS            |
|  |  |  | CYP125G6  | 2526165625.c00007_K389DRA...region2 | NRPS            |
|  |  |  | CYP154M15 | 2526165625.c00007_K389DRA...region2 | NRPS            |
|  |  |  | CYP107Q4  | 2526165628.c00010_K389DRA...region1 | T1PKS           |
|  |  |  | CYP105G5  | 2526165628.c00010_K389DRA...region1 | T1PKS           |
|  |  |  | CYP1051A1 | 2526165628.c00010_K389DRA...region2 | Terpene         |
|  |  |  | CYP244A4  | 2526165630.c00012_K389DRA...region1 | Indole          |
|  |  |  | CYP245A7  | 2526165630.c00012_K389DRA...region1 | Indole          |
|  |  |  | CYP162P1  | 2526165633.c00015_K389DRA...region1 | NRPS            |
|  |  |  | CYP211C1  | 2526165636.c00018_K389DRA...region1 | T2PKS           |
|  |  |  | CYP154M20 | 2526165638.c00020_K389DRA...region1 | oligosaccharide |

|                                     |          |   |           |                                     |                 |
|-------------------------------------|----------|---|-----------|-------------------------------------|-----------------|
|                                     |          |   | CYP248A2  | 2526165638.c00020_K389DRA...region1 | oligosaccharide |
|                                     |          |   | CYP105W2  | 2526165638.c00020_K389DRA...region1 | oligosaccharide |
|                                     |          |   | CYP154M13 | 2526165638.c00020_K389DRA...region1 | oligosaccharide |
|                                     |          |   | CYP154M21 | 2526165638.c00020_K389DRA...region1 | oligosaccharide |
|                                     |          |   | CYP107AY2 | 2526165640.c00022_K389DRA...region1 | NRPS            |
|                                     |          |   | CYP1198B1 | 2526165640.c00022_K389DRA...region1 | NRPS            |
| <i>Salinispora arenicola</i> CNH646 | 25154181 | 6 | CYP211C1  | 2515168709.c00001_B163DRA...region3 | T2PKS           |
|                                     |          |   | CYP162P1  | 2515168711.c00003_B163DRA...region1 | NRPS            |
|                                     |          |   | CYP208A12 | 2515168712.c00004_B163DRA...region2 | T1PKS           |
|                                     |          |   | CYP107Q4  | 2515168715.c00007_B163DRA...region1 | T1PKS           |
|                                     |          |   | CYP105G5  | 2515168715.c00007_B163DRA...region1 | T1PKS           |

|                                     |            |    |           |                                     |                 |
|-------------------------------------|------------|----|-----------|-------------------------------------|-----------------|
|                                     |            |    | CYP1051A1 | 2515168715.c00007_B163DRA...region2 | Terpene         |
| <i>Salinispora arenicola</i> CNY280 | 2517572154 | 14 | CYP245A7  | 2517596283.c00001_C580DRA...region1 | Indole          |
|                                     |            |    | CYP244A4  | 2517596283.c00001_C580DRA...region1 | Indole          |
|                                     |            |    | CYP105CP2 | 2517596283.c00001_C580DRA...region3 | NRPS            |
|                                     |            |    | CYP105CN1 | 2517596283.c00001_C580DRA...region3 | NRPS            |
|                                     |            |    | CYP107FS2 | 2517596283.c00001_C580DRA...region3 | NRPS            |
|                                     |            |    | CYP125G6  | 2517596283.c00001_C580DRA...region3 | NRPS            |
|                                     |            |    | CYP154M15 | 2517596283.c00001_C580DRA...region3 | NRPS            |
|                                     |            |    | CYP154M20 | 2517596283.c00001_C580DRA...region4 | oligosaccharide |
|                                     |            |    | CYP248A2  | 2517596283.c00001_C580DRA...region4 | oligosaccharide |
|                                     |            |    | CYP105W2  | 2517596283.c00001_C580DRA...region4 | oligosaccharide |

|                                     |            |    |           |                                     |                 |
|-------------------------------------|------------|----|-----------|-------------------------------------|-----------------|
|                                     |            |    | CYP154M13 | 2517596283.c00001_C580DRA...region4 | oligosaccharide |
|                                     |            |    | CYP154M21 | 2517596283.c00001_C580DRA...region4 | oligosaccharide |
|                                     |            |    | CYP211C1  | 2517596285.c00003_C580DRA...region3 | T2PKS           |
|                                     |            |    | CYP208A12 | 2517596287.c00005_C580DRA...region1 | T1PKS           |
| <i>Salinispora pacifica</i> CNY202  | 2528311034 | 4  | CYP154M19 | 2528320063.c00001_K228DRA...region1 | NRPS            |
|                                     |            |    | CYP154AJ3 | 2528320085.c00023_K228DRA...region1 | NRPS            |
|                                     |            |    | CYP211C3  | 2528320095.c00033_K228DRA...region1 | T2PKS           |
|                                     |            |    | CYP107AY4 | 2528320103.c00041_K228DRA...region1 | NRPS            |
| <i>Salinispora arenicola</i> CNX891 | 2515154187 | 14 | CYP245A7  | 2515169201.c00006_B108DRA...region2 | Indole          |
|                                     |            |    | CYP244A4  | 2515169201.c00006_B108DRA...region2 | Indole          |
|                                     |            |    | CYP105CP2 | 2515169204.c00009_B108DRA...region2 | NRPS            |



|  |  |  |                    |                                     |         |
|--|--|--|--------------------|-------------------------------------|---------|
|  |  |  | CYP105CN1          | 2515169204.c00009_B108DRA...region2 | NRPS    |
|  |  |  | CYP107FS2          | 2515169204.c00009_B108DRA...region2 | NRPS    |
|  |  |  | CYP248A2           | 2515169204.c00009_B108DRA...region2 | NRPS    |
|  |  |  | CYP105W2           | 2515169204.c00009_B108DRA...region2 | NRPS    |
|  |  |  | CYP107Q4           | 2515169207.c00012_B108DRA...region1 | T1PKS   |
|  |  |  | CYP105G5           | 2515169207.c00012_B108DRA...region1 | T1PKS   |
|  |  |  | CYP1051A1          | 2515169207.c00012_B108DRA...region2 | Terpene |
|  |  |  | CYP211C1           | 2515169209.c00014_B108DRA...region1 | T2PKS   |
|  |  |  | CYP107AY2-fragment | 2515169210.c00015_B108DRA...region1 | NRPS    |
|  |  |  | CYP105CT1          | 2515169210.c00015_B108DRA...region1 | NRPS    |
|  |  |  | CYP154M5           | 2515169210.c00015_B108DRA...region1 | NRPS    |

|                                    |            |    |           |                                     |             |
|------------------------------------|------------|----|-----------|-------------------------------------|-------------|
| <i>Salinispora pacifica</i> CNT855 | 2515154128 | 7  | CYP107AW7 | 2515165046.c00001_B113DRA...region2 | Bacteriocin |
|                                    |            |    | CYP107FH3 | 2515165058.c00013_B113DRA...region1 | NRPS-like   |
|                                    |            |    | CYP2054A3 | 2515165058.c00013_B113DRA...region1 | NRPS-like   |
|                                    |            |    | CYP161N4  | 2515165058.c00013_B113DRA...region1 | NRPS-like   |
|                                    |            |    | CYP208A22 | 2515165059.c00014_B113DRA...region1 | T1PKS       |
|                                    |            |    | CYP107AY9 | 2515165080.c00035_B113DRA...region1 | NRPS        |
|                                    |            |    | CYP107E37 | 2515165095.c00050_B113DRA...region1 | T1PKS       |
| <i>Salinispora pacifica</i> CNS996 | 2517572157 | 13 | CYP244A5  | 2517596538.c00006_C553DRA...region1 | NRPS        |
|                                    |            |    | CYP245A11 | 2517596538.c00006_C553DRA...region1 | NRPS        |
|                                    |            |    | CYP211C6  | 2517596539.c00007_C553DRA...region1 | T2PKS       |
|                                    |            |    | CYP107CL2 | 2517596540.c00008_C553DRA...region1 | NRPS        |

|                                     |            |    |           |                                     |                 |
|-------------------------------------|------------|----|-----------|-------------------------------------|-----------------|
|                                     |            |    | CYP1056B2 | 2517596540.c00008_C553DRA...region1 | NRPS            |
|                                     |            |    | CYP107AW6 | 2517596542.c00010_C553DRA...region1 | Bacteriocin     |
|                                     |            |    | CYP208A21 | 2517596542.c00010_C553DRA...region2 | NRPS            |
|                                     |            |    | CYP154M16 | 2517596542.c00010_C553DRA...region2 | NRPS            |
|                                     |            |    | CYP163B20 | 2517596543.c00011_C553DRA...region1 | NRPS            |
|                                     |            |    | CYP162A8  | 2517596549.c00017_C553DRA...region1 | NRPS-like       |
|                                     |            |    | CYP107AY7 | 2517596554.c00022_C553DRA...region1 | NRPS            |
|                                     |            |    | CYP2091A1 | 2517596560.c00028_C553DRA...region1 | oligosaccharide |
|                                     |            |    | CYP107CT3 | 2517596564.c00032_C553DRA...region1 | NRPS            |
| <i>Salinispora arenicola</i> CNT850 | 2515154135 | 22 | CYP208A12 | 2515165460.c00004_B165DRA...region1 | T1PKS           |
|                                     |            |    | CYP166A4  | 2515165462.c00006_B165DRA...region1 | T1PKS           |

|  |  |  |           |                                     |         |
|--|--|--|-----------|-------------------------------------|---------|
|  |  |  | CYP105CP2 | 2515165463.c00007_B165DRA...region2 | NRPS    |
|  |  |  | CYP105CN1 | 2515165463.c00007_B165DRA...region2 | NRPS    |
|  |  |  | CYP107FS2 | 2515165463.c00007_B165DRA...region2 | NRPS    |
|  |  |  | CYP125G6  | 2515165463.c00007_B165DRA...region2 | NRPS    |
|  |  |  | CYP154M15 | 2515165463.c00007_B165DRA...region2 | NRPS    |
|  |  |  | CYP1051A1 | 2515165467.c00011_B165DRA...region1 | Terpene |
|  |  |  | CYP105G5  | 2515165467.c00011_B165DRA...region2 | T1PKS   |
|  |  |  | CYP107Q4  | 2515165467.c00011_B165DRA...region2 | T1PKS   |
|  |  |  | CYP244A4  | 2515165468.c00012_B165DRA...region1 | Indole  |
|  |  |  | CYP245A7  | 2515165468.c00012_B165DRA...region1 | Indole  |
|  |  |  | CYP211C1  | 2515165472.c00016_B165DRA...region1 | T2PKS   |

|                                     |            |   |            |                                     |             |
|-------------------------------------|------------|---|------------|-------------------------------------|-------------|
|                                     |            |   | CYP154M21  | 2515165474.c00018_B165DRA...region1 | NRPS        |
|                                     |            |   | CYP154M13  | 2515165474.c00018_B165DRA...region1 | NRPS        |
|                                     |            |   | CYP105W2   | 2515165474.c00018_B165DRA...region1 | NRPS        |
|                                     |            |   | CYP248A2   | 2515165474.c00018_B165DRA...region1 | NRPS        |
|                                     |            |   | CYP154M20  | 2515165474.c00018_B165DRA...region1 | NRPS        |
|                                     |            |   | CYP162P1   | 2515165477.c00021_B165DRA...region1 | NRPS        |
|                                     |            |   | CYP107AY2  | 2515165478.c00022_B165DRA...region1 | NRPS        |
|                                     |            |   | CYP105CH1  | 2515165485.c00029_B165DRA...region1 | T1PKS       |
|                                     |            |   | CYP107EU1  | 2515165489.c00033_B165DRA...region1 | T1PKS       |
| <i>Salinispora pacifica</i> CNT133A | 2561511035 | 6 | CYP107AW10 | 2561515153.c00003_T436DRA...region2 | Bacteriocin |
|                                     |            |   | CYP244A12  | 2561515162.c00012_T436DRA...region2 | NRPS        |

|                                     |            |    |           |                                     |                 |
|-------------------------------------|------------|----|-----------|-------------------------------------|-----------------|
|                                     |            |    | CYP107AY8 | 2561515162.c00012_T436DRA...region2 | NRPS            |
|                                     |            |    | CYP208A30 | 2561515165.c00015_T436DRA...region2 | T1PKS           |
|                                     |            |    | CYP163B20 | 2561515195.c00045_T436DRA...region1 | NRPS            |
|                                     |            |    | CYP107E37 | 2561515204.c00054_T436DRA...region1 | T1PKS           |
| <i>Salinispora arenicola</i> CNH941 | 2515154193 | 16 | CYP105CP2 | 2515169666.c00003_B109DRA...region2 | NRPS            |
|                                     |            |    | CYP105CN1 | 2515169666.c00003_B109DRA...region2 | NRPS            |
|                                     |            |    | CYP107FS2 | 2515169666.c00003_B109DRA...region2 | NRPS            |
|                                     |            |    | CYP125G6  | 2515169666.c00003_B109DRA...region2 | NRPS            |
|                                     |            |    | CYP154M15 | 2515169666.c00003_B109DRA...region2 | NRPS            |
|                                     |            |    | CYP154M20 | 2515169666.c00003_B109DRA...region3 | oligosaccharide |
|                                     |            |    | CYP248A2  | 2515169666.c00003_B109DRA...region3 | oligosaccharide |

|                                    |            |   |           |                                     |                 |
|------------------------------------|------------|---|-----------|-------------------------------------|-----------------|
|                                    |            |   | CYP105W2  | 2515169666.c00003_B109DRA...region3 | oligosaccharide |
|                                    |            |   | CYP154M13 | 2515169666.c00003_B109DRA...region3 | oligosaccharide |
|                                    |            |   | CYP154M21 | 2515169666.c00003_B109DRA...region3 | oligosaccharide |
|                                    |            |   | CYP208A12 | 2515169667.c00004_B109DRA...region1 | T1PKS           |
|                                    |            |   | CYP245A7  | 2515169670.c00007_B109DRA...region1 | Indole          |
|                                    |            |   | CYP244A4  | 2515169670.c00007_B109DRA...region1 | Indole          |
|                                    |            |   | CYP107Q4  | 2515169674.c00011_B109DRA...region1 | T1PKS           |
|                                    |            |   | CYP105G5  | 2515169674.c00011_B109DRA...region1 | T1PKS           |
|                                    |            |   | CYP1051A1 | 2515169674.c00011_B109DRA...region2 | Terpene         |
| <i>Salinispora pacifica</i> CNY239 | 2524614561 | 7 | CYP161N4  | 2524661751.c00016_H304DRA...region1 | T3PKS           |
|                                    |            |   | CYP2054A3 | 2524661751.c00016_H304DRA...region1 | T3PKS           |

|                                     |            |   |           |                                     |       |
|-------------------------------------|------------|---|-----------|-------------------------------------|-------|
|                                     |            |   | CYP107FH3 | 2524661751.c00016_H304DRA...region1 | T3PKS |
|                                     |            |   | CYP208A22 | 2524661756.c00021_H304DRA...region1 | T1PKS |
|                                     |            |   | CYP244A10 | 2524661759.c00024_H304DRA...region1 | NRPS  |
|                                     |            |   | CYP107AY9 | 2524661759.c00024_H304DRA...region1 | NRPS  |
|                                     |            |   | CYP107E37 | 2524661790.c00055_H304DRA...region1 | T1PKS |
| <i>Salinispora arenicola</i> CNR425 | 2528311033 | 1 | CYP211C1  | 2528319994.c00002_I008DRA...region4 | T2PKS |
| <i>Salinispora pacifica</i> CNR942  | 2518285561 | 9 | CYP1004B4 | 2518290928.c00001_C549DRA...region1 | NRPS  |
|                                     |            |   | CYP1004A3 | 2518290928.c00001_C549DRA...region1 | NRPS  |
|                                     |            |   | CYP125G4  | 2518290928.c00001_C549DRA...region1 | NRPS  |
|                                     |            |   | CYP208A24 | 2518290928.c00001_C549DRA...region2 | T1PKS |
|                                     |            |   | CYP211C5  | 2518290928.c00001_C549DRA...region4 | T2PKS |



|                                      |            |   |            |                                     |             |
|--------------------------------------|------------|---|------------|-------------------------------------|-------------|
|                                      |            |   | CYP163B18  | 2518290934.c00007_C549DRA...region1 | NRPS        |
|                                      |            |   | CYP1207A12 | 2518290936.c00009_C549DRA...region2 | NRPS        |
|                                      |            |   | CYP107AY3  | 2518290951.c00024_C549DRA...region1 | NRPS        |
|                                      |            |   | CYP113X1   | 2518290937.c00010_C549DRA...region1 | transAT-PKS |
| <i>Salinispora pacifica</i> CNT029 : | 2515154177 | 8 | CYP154J2   | 2515168458.c00001_B170DRA...region2 | NRPS        |
|                                      |            |   | CYP244A5   | 2515168458.c00001_B170DRA...region3 | NRPS        |
|                                      |            |   | CYP245A11  | 2515168458.c00001_B170DRA...region3 | NRPS        |
|                                      |            |   | CYP107AW6  | 2515168458.c00001_B170DRA...region4 | Bacteriocin |
|                                      |            |   | CYP208A21  | 2515168458.c00001_B170DRA...region5 | NRPS        |
|                                      |            |   | CYP154M16  | 2515168458.c00001_B170DRA...region5 | NRPS        |
|                                      |            |   | CYP211C6   | 2515168458.c00001_B170DRA...region9 | T2PKS       |

|                                     |            |    |                    |                                     |         |
|-------------------------------------|------------|----|--------------------|-------------------------------------|---------|
|                                     |            |    | CYP107AY7          | 2515168473.c00016_B170DRA...region1 | terpene |
| <i>Salinispora arenicola</i> CNX814 | 2517572152 | 16 | CYP208A12          | 2517596139.c00004_C575DRA...region1 | T1PKS   |
|                                     |            |    | CYP245A7           | 2517596141.c00006_C575DRA...region2 | Indole  |
|                                     |            |    | CYP244A4           | 2517596141.c00006_C575DRA...region2 | Indole  |
|                                     |            |    | CYP166A4           | 2517596142.c00007_C575DRA...region2 | T1PKS   |
|                                     |            |    | CYP107AY2-fragment | 2517596144.c00009_C575DRA...region1 | NRPS    |
|                                     |            |    | CYP105CT1          | 2517596144.c00009_C575DRA...region1 | NRPS    |
|                                     |            |    | CYP154M5           | 2517596144.c00009_C575DRA...region1 | NRPS    |
|                                     |            |    | CYP107FS2          | 2517596146.c00011_C575DRA...region1 | NRPS    |
|                                     |            |    | CYP105CN1          | 2517596146.c00011_C575DRA...region1 | NRPS    |
|                                     |            |    | CYP105CP2          | 2517596146.c00011_C575DRA...region1 | NRPS    |

|                                    |            |   |           |                                     |                 |
|------------------------------------|------------|---|-----------|-------------------------------------|-----------------|
|                                    |            |   | CYP1051A1 | 2517596147.c00012_C575DRA...region1 | Terpene         |
|                                    |            |   | CYP105G5  | 2517596147.c00012_C575DRA...region2 | T1PKS           |
|                                    |            |   | CYP107Q4  | 2517596147.c00012_C575DRA...region2 | T1PKS           |
|                                    |            |   | CYP211C1  | 2517596151.c00016_C575DRA...region1 | T2PKS           |
|                                    |            |   | CYP105W2  | 2517596157.c00022_C575DRA...region1 | oligosaccharide |
|                                    |            |   | CYP248A2  | 2517596157.c00022_C575DRA...region1 | oligosaccharide |
| <i>Salinispora pacifica</i> CNR894 | 2515154194 | 9 | CYP107AW7 | 2515169737.c00001_B119DRA...region2 | Bacteriocin     |
|                                    |            |   | CYP164C2  | 2515169739.c00003_B119DRA...region1 | NRPS            |
|                                    |            |   | CYP208A22 | 2515169754.c00018_B119DRA...region1 | T1PKS           |
|                                    |            |   | CYP161N4  | 2515169756.c00020_B119DRA...region1 | T3PKS           |
|                                    |            |   | CYP2054A3 | 2515169756.c00020_B119DRA...region1 | T3PKS           |

|                                    |            |    |           |                                     |         |
|------------------------------------|------------|----|-----------|-------------------------------------|---------|
|                                    |            |    | CYP107FH3 | 2515169756.c00020_B119DRA...region1 | T3PKS   |
|                                    |            |    | CYP107AY9 | 2515169760.c00024_B119DRA...region1 | terpene |
|                                    |            |    | CYP244A10 | 2515169760.c00024_B119DRA...region1 | terpene |
|                                    |            |    | CYP107E37 | 2515169793.c00057_B119DRA...region1 | T1PKS   |
| <i>Salinispora pacifica</i> CNT150 | 2515154136 | 12 | CYP211C8  | 2515165525.c00002_B174DRA...region2 | T2PKS   |
|                                    |            |    | CYP244A5  | 2515165532.c00009_B174DRA...region1 | Indole  |
|                                    |            |    | CYP245A13 | 2515165532.c00009_B174DRA...region1 | Indole  |
|                                    |            |    | CYP208A28 | 2515165533.c00010_B174DRA...region1 | T1PKS   |
|                                    |            |    | CYP154M18 | 2515165533.c00010_B174DRA...region1 | T1PKS   |
|                                    |            |    | CYP107Z27 | 2515165536.c00013_B174DRA...region1 | NRPS    |
|                                    |            |    | CYP247A8  | 2515165536.c00013_B174DRA...region1 | NRPS    |

|                                   |            |    |           |                                     |                   |
|-----------------------------------|------------|----|-----------|-------------------------------------|-------------------|
|                                   |            |    | CYP107NH1 | 2515165536.c00013_B174DRA...region1 | NRPS              |
|                                   |            |    | CYP105AH4 | 2515165538.c00015_B174DRA...region1 | T1PKS             |
|                                   |            |    | CYP113E2  | 2515165542.c00019_B174DRA...region1 | T1PKS             |
|                                   |            |    | CYP244A9  | 2515165550.c00027_B174DRA...region1 | NRPS              |
|                                   |            |    | CYP107NG1 | 2515165562.c00039_B174DRA...region1 | T2PKS             |
| <i>Salinispora tropica</i> CNS197 | 2515154163 | 11 | CYP163B1  | 2515167485.c00002_B123DRA...region2 | transAT-PKS-like, |
|                                   |            |    | CYP154M1  | 2515167486.c00003_B123DRA...region2 | NRPS              |
|                                   |            |    | CYP208A4  | 2515167486.c00003_B123DRA...region2 | NRPS              |
|                                   |            |    | CYP211C1  | 2515167486.c00003_B123DRA...region4 | T2PKS             |
|                                   |            |    | CYP107AW1 | 2515167488.c00005_B123DRA...region2 | Bacteriocin       |
|                                   |            |    | CYP107AY1 | 2515167489.c00006_B123DRA...region2 | NRPS              |

|                                     |            |    |           |                                     |        |
|-------------------------------------|------------|----|-----------|-------------------------------------|--------|
|                                     |            |    | CYP113E1  | 2515167500.c00017_B123DRA...region2 | T1PKS  |
|                                     |            |    | CYP1004B1 | 2515167505.c00022_B123DRA...region1 | NRPS   |
|                                     |            |    | CYP1004A1 | 2515167505.c00022_B123DRA...region1 | NRPS   |
|                                     |            |    | CYP125G1  | 2515167505.c00022_B123DRA...region1 | NRPS   |
|                                     |            |    | CYP107E3  | 2515167515.c00032_B123DRA...region1 | T1PKS  |
| <i>Salinispora arenicola</i> CNS848 | 2571042345 | 16 | CYP162P1  | 2571067352.c00001_T422DRA...region1 | NRPS   |
|                                     |            |    | CYP211C1  | 2571067353.c00002_T422DRA...region1 | T2PKS  |
|                                     |            |    | CYP166A4  | 2571067354.c00003_T422DRA...region1 | T1PKS  |
|                                     |            |    | CYP208A12 | 2571067355.c00004_T422DRA...region1 | T1PKS  |
|                                     |            |    | CYP107AY2 | 2571067357.c00006_T422DRA...region1 | NRPS   |
|                                     |            |    | CYP245A7  | 2571067358.c00007_T422DRA...region1 | Indole |

|                                     |            |    |           |                                     |         |
|-------------------------------------|------------|----|-----------|-------------------------------------|---------|
|                                     |            |    | CYP244A4  | 2571067358.c00007_T422DRA...region1 | Indole  |
|                                     |            |    | CYP105CP2 | 2571067360.c00009_T422DRA...region2 | NRPS    |
|                                     |            |    | CYP105CN1 | 2571067360.c00009_T422DRA...region2 | NRPS    |
|                                     |            |    | CYP107FS2 | 2571067360.c00009_T422DRA...region2 | NRPS    |
|                                     |            |    | CYP125G6  | 2571067360.c00009_T422DRA...region2 | NRPS,   |
|                                     |            |    | CYP154M15 | 2571067360.c00009_T422DRA...region2 | NRPS    |
|                                     |            |    | CYP154M21 | 2571067367.c00016_T422DRA...region1 | NRPS    |
|                                     |            |    | CYP154M13 | 2571067367.c00016_T422DRA...region1 | NRPS    |
|                                     |            |    | CYP105W2  | 2571067367.c00016_T422DRA...region1 | NRPS    |
|                                     |            |    | CYP248A2  | 2571067367.c00016_T422DRA...region1 | NRPS    |
| <i>Salinispora arenicola</i> CNH905 | 2515154183 | 22 | CYP1051A1 | 2515168866.c00001_B102DRA...region1 | Terpene |

|  |  |  |           |                                     |                 |
|--|--|--|-----------|-------------------------------------|-----------------|
|  |  |  | CYP105G5  | 2515168866.c00001_B102DRA...region2 | T1PKS           |
|  |  |  | CYP107Q4  | 2515168866.c00001_B102DRA...region2 | T1PKS           |
|  |  |  | CYP208A12 | 2515168867.c00002_B102DRA...region2 | T1PKS           |
|  |  |  | CYP211C1  | 2515168868.c00003_B102DRA...region1 | T2PKS           |
|  |  |  | CYP162P1  | 2515168871.c00006_B102DRA...region1 | NRPS            |
|  |  |  | CYP244A4  | 2515168873.c00008_B102DRA...region1 | Indole          |
|  |  |  | CYP245A7  | 2515168873.c00008_B102DRA...region1 | Indole          |
|  |  |  | CYP107EU1 | 2515168877.c00012_B102DRA...region1 | NRPS-like       |
|  |  |  | CYP166A4  | 2515168880.c00015_B102DRA...region1 | T1PKS           |
|  |  |  | CYP154M20 | 2515168881.c00016_B102DRA...region1 | oligosaccharide |
|  |  |  | CYP248A2  | 2515168881.c00016_B102DRA...region1 | oligosaccharide |



|                                     |                |    |            |                                         |                 |
|-------------------------------------|----------------|----|------------|-----------------------------------------|-----------------|
|                                     |                |    | CYP105W2   | 2515168881.c00016_B102DRA...regi<br>on1 | oligosaccharide |
|                                     |                |    | CYP154M13  | 2515168881.c00016_B102DRA...regi<br>on1 | oligosaccharide |
|                                     |                |    | CYP154M21  | 2515168881.c00016_B102DRA...regi<br>on1 | oligosaccharide |
|                                     |                |    | CYP105CP2  | 2515168882.c00017_B102DRA...regi<br>on2 | NRPS            |
|                                     |                |    | CYP105CN1  | 2515168882.c00017_B102DRA...regi<br>on2 | NRPS            |
|                                     |                |    | CYP107FS2  | 2515168882.c00017_B102DRA...regi<br>on2 | NRPS            |
|                                     |                |    | CYP125G6   | 2515168886.c00021_B102DRA...regi<br>on1 | NRPS            |
|                                     |                |    | CYP154M15  | 2515168886.c00021_B102DRA...regi<br>on1 | NRPS            |
|                                     |                |    | CYP107AY13 | 2515168892.c00027_B102DRA...regi<br>on1 | T1PKS           |
|                                     |                |    | CYP1198B1  | 2515168902.c00037_B102DRA...regi<br>on1 | NRPS            |
| <i>Salinispora arenicola</i> CNY256 | 251828555<br>9 | 15 | CYP208A12  | 2518290787.c00002_C578DRA...regi<br>on1 | T1PKS           |

|  |  |  |           |                                     |                 |
|--|--|--|-----------|-------------------------------------|-----------------|
|  |  |  | CYP107AY2 | 2518290789.c00004_C578DRA...region1 | NRPS            |
|  |  |  | CYP105CT1 | 2518290789.c00004_C578DRA...region1 | NRPS            |
|  |  |  | CYP154M5  | 2518290789.c00004_C578DRA...region1 | NRPS            |
|  |  |  | CYP211C1  | 2518290790.c00005_C578DRA...region1 | T2PKS           |
|  |  |  | CYP1051A1 | 2518290791.c00006_C578DRA...region1 | Terpene         |
|  |  |  | CYP105G5  | 2518290791.c00006_C578DRA...region2 | T1PKS           |
|  |  |  | CYP107Q4  | 2518290791.c00006_C578DRA...region2 | T1PKS           |
|  |  |  | CYP245A7  | 2518290795.c00010_C578DRA...region1 | Indole          |
|  |  |  | CYP244A4  | 2518290795.c00010_C578DRA...region1 | Indole          |
|  |  |  | CYP105W2  | 2518290796.c00011_C578DRA...region1 | oligosaccharide |
|  |  |  | CYP248A2  | 2518290796.c00011_C578DRA...region1 | oligosaccharide |

|                                     |            |    |           |                                     |                 |
|-------------------------------------|------------|----|-----------|-------------------------------------|-----------------|
|                                     |            |    | CYP107FS2 | 2518290796.c00011_C578DRA...region1 | oligosaccharide |
|                                     |            |    | CYP105CN1 | 2518290796.c00011_C578DRA...region1 | oligosaccharide |
|                                     |            |    | CYP105CP2 | 2518290796.c00011_C578DRA...region1 | oligosaccharide |
| <i>Salinispora arenicola</i> CNS820 | 2565956528 | 14 | CYP211C1  | 2565959905.c00001_T365DRA...region5 | T2PKS           |
|                                     |            |    | CYP208A12 | 2565959907.c00003_T365DRA...region2 | T1PKS           |
|                                     |            |    | CYP105CT1 | 2565959908.c00004_T365DRA...region1 | terpene         |
|                                     |            |    | CYP154M5  | 2565959908.c00004_T365DRA...region1 | terpene         |
|                                     |            |    | CYP244A4  | 2565959911.c00007_T365DRA...region1 | Indole          |
|                                     |            |    | CYP245A7  | 2565959911.c00007_T365DRA...region1 | Indole          |
|                                     |            |    | CYP166A4  | 2565959913.c00009_T365DRA...region1 | T1PKS           |
|                                     |            |    | CYP107FS2 | 2565959916.c00012_T365DRA...region1 | NRPS            |

|                                     |            |    |           |                                     |           |
|-------------------------------------|------------|----|-----------|-------------------------------------|-----------|
|                                     |            |    | CYP105CN1 | 2565959916.c00012_T365DRA...region1 | NRPS      |
|                                     |            |    | CYP105CP2 | 2565959916.c00012_T365DRA...region1 | NRPS      |
|                                     |            |    | CYP107Q4  | 2565959917.c00013_T365DRA...region1 | T1PKS     |
|                                     |            |    | CYP105G5  | 2565959917.c00013_T365DRA...region1 | T1PKS     |
|                                     |            |    | CYP1051A1 | 2565959917.c00013_T365DRA...region2 | Terpene   |
|                                     |            |    | CYP107AY2 | 2565959922.c00018_T365DRA...region1 | NRPS      |
| <i>Salinispora arenicola</i> CNS243 | 2524614515 | 16 | CYP211C1  | 2524617272.c00002_H302DRA...region5 | T2PKS     |
|                                     |            |    | CYP166A4  | 2524617274.c00004_H302DRA...region2 | NRPS-like |
|                                     |            |    | CYP244A4  | 2524617277.c00007_H302DRA...region1 | Indole    |
|                                     |            |    | CYP245A7  | 2524617277.c00007_H302DRA...region1 | Indole    |
|                                     |            |    | CYP208A12 | 2524617278.c00008_H302DRA...region1 | T1PKS     |

|  |  |  |                    |                                     |         |
|--|--|--|--------------------|-------------------------------------|---------|
|  |  |  | CYP107AY2-fragment | 2524617279.c00009_H302DRA...region1 | NRPS    |
|  |  |  | CYP105CT1          | 2524617279.c00009_H302DRA...region2 | terpene |
|  |  |  | CYP154M5           | 2524617279.c00009_H302DRA...region2 | terpene |
|  |  |  | CYP1051A1          | 2524617285.c00015_H302DRA...region1 | Terpene |
|  |  |  | CYP105G5           | 2524617285.c00015_H302DRA...region2 | T1PKS   |
|  |  |  | CYP107Q4           | 2524617285.c00015_H302DRA...region2 | T1PKS   |
|  |  |  | CYP248A2           | 2524617286.c00016_H302DRA...region1 | NRPS    |
|  |  |  | CYP105W2           | 2524617286.c00016_H302DRA...region1 | NRPS    |
|  |  |  | CYP105CP2          | 2524617288.c00018_H302DRA...region2 | NRPS    |
|  |  |  | CYP105CN1          | 2524617288.c00018_H302DRA...region2 | NRPS    |
|  |  |  | CYP107FS2          | 2524617288.c00018_H302DRA...region2 | NRPS    |

|                                   |           |    |           |                                     |             |
|-----------------------------------|-----------|----|-----------|-------------------------------------|-------------|
| <i>Salinispora tropica</i> CNB536 | 251752212 | 13 | CYP163B1  | 2517600344.c00001_B099DRA...region1 | NRPS        |
|                                   |           |    | CYP107NH1 | 2517600344.c00001_B099DRA...region3 | NRPS        |
|                                   |           |    | CYP247A8  | 2517600344.c00001_B099DRA...region3 | NRPS        |
|                                   |           |    | CYP107Z27 | 2517600344.c00001_B099DRA...region3 | NRPS        |
|                                   |           |    | CYP211C1  | 2517600350.c00007_B099DRA...region1 | T2PKS       |
|                                   |           |    | CYP125G1  | 2517600362.c00019_B099DRA...region1 | NRPS        |
|                                   |           |    | CYP1004A1 | 2517600362.c00019_B099DRA...region1 | NRPS        |
|                                   |           |    | CYP1004B1 | 2517600362.c00019_B099DRA...region1 | NRPS        |
|                                   |           |    | CYP107AY1 | 2517600365.c00022_B099DRA...region1 | NRPS        |
|                                   |           |    | CYP208A22 | 2517600379.c00036_B099DRA...region1 | T1PKS       |
|                                   |           |    | CYP107AW1 | 2517600390.c00047_B099DRA...region1 | Bacteriocin |

|                                     |            |    |            |                                     |             |
|-------------------------------------|------------|----|------------|-------------------------------------|-------------|
|                                     |            |    | CYP107E3   | 2517600398.c00055_B099DRA...region1 | T1PKS       |
|                                     |            |    | CYP283A2   | 2517600408.c00065_B099DRA...region1 | bacteriocin |
| <i>Salinispora pacifica</i> CNT084  | 2515154202 | 6  | CYP107AW10 | 2515170504.c00006_B171DRA...region2 | Bacteriocin |
|                                     |            |    | CYP208A30  | 2515170512.c00014_B171DRA...region1 | T1PKS       |
|                                     |            |    | CYP244A12  | 2515170513.c00015_B171DRA...region1 | NRPS        |
|                                     |            |    | CYP107AY8  | 2515170513.c00015_B171DRA...region1 | NRPS        |
|                                     |            |    | CYP163B20  | 2515170545.c00047_B171DRA...region1 | NRPS        |
|                                     |            |    | CYP107E37  | 2515170551.c00053_B171DRA...region1 | T1PKS       |
| <i>Salinispora arenicola</i> CNT857 | 2515154127 | 21 | CYP208A12  | 2515164954.c00001_B107DRA...region2 | T1PKS       |
|                                     |            |    | CYP105CP2  | 2515164957.c00004_B107DRA...region2 | NRPS        |
|                                     |            |    | CYP105CN1  | 2515164957.c00004_B107DRA...region2 | NRPS        |

|  |  |  |           |                                     |                 |
|--|--|--|-----------|-------------------------------------|-----------------|
|  |  |  | CYP107FS2 | 2515164957.c00004_B107DRA...region2 | NRPS            |
|  |  |  | CYP125G6  | 2515164957.c00004_B107DRA...region2 | NRPS            |
|  |  |  | CYP154M15 | 2515164957.c00004_B107DRA...region2 | NRPS            |
|  |  |  | CYP154M20 | 2515164957.c00004_B107DRA...region3 | oligosaccharide |
|  |  |  | CYP248A2  | 2515164957.c00004_B107DRA...region3 | oligosaccharide |
|  |  |  | CYP105W2  | 2515164957.c00004_B107DRA...region3 | oligosaccharide |
|  |  |  | CYP154M13 | 2515164957.c00004_B107DRA...region3 | oligosaccharide |
|  |  |  | CYP154M21 | 2515164957.c00004_B107DRA...region3 | oligosaccharide |
|  |  |  | CYP211C1  | 2515164959.c00006_B107DRA...region2 | T2PKS           |
|  |  |  | CYP105CH1 | 2515164962.c00009_B107DRA...region2 | T1PKS           |
|  |  |  | CYP107Q4  | 2515164963.c00010_B107DRA...region1 | T1PKS           |



|                                       |            |   |            |                                      |             |
|---------------------------------------|------------|---|------------|--------------------------------------|-------------|
|                                       |            |   | CYP105G5   | 2515164963.c00010_B107DRA...region1  | T1PKS       |
|                                       |            |   | CYP1051A1  | 2515164963.c00010_B107DRA...region2  | Terpene     |
|                                       |            |   | CYP245A7   | 2515164965.c00012_B107DRA...region1  | Indole      |
|                                       |            |   | CYP244A4   | 2515164965.c00012_B107DRA...region1  | Indole      |
|                                       |            |   | CYP166A4   | 2515164966.c00013_B107DRA...region1  | T1PKS       |
|                                       |            |   | CYP107AX13 | 2515164968.c00015_B107DRA...region1  | ladderane   |
|                                       |            |   | CYP162N1   | 2515164976.c00023_B107DRA...region1  | NRPS        |
| <i>Salinispora pacifica</i> DSM 45546 | 2516653042 | 7 | CYP107AY7  | 2516665583.c00001_Salpac5...region6  | NRPS        |
|                                       |            |   | CYP244A5   | 2516665583.c00001_Salpac5...region14 | NRPS        |
|                                       |            |   | CYP245A11  | 2516665583.c00001_Salpac5...region14 | NRPS        |
|                                       |            |   | CYP107AW6  | 2516665583.c00001_Salpac5...region15 | Bacteriocin |

|                                   |                |    |           |                                          |             |
|-----------------------------------|----------------|----|-----------|------------------------------------------|-------------|
|                                   |                |    | CYP154M16 | 2516665583.c00001_Salpac5...region<br>16 | NRPS        |
|                                   |                |    | CYP211C6  | 2516665583.c00001_Salpac5...region<br>19 | T2PKS       |
|                                   |                |    | CYP1278A4 | 2516665583.c00001_Salpac5...region<br>22 | NRPS        |
| <i>Salinispora tropica</i> CNY012 | 254034119<br>2 | 12 | CYP163B1  | 2540348493.c00003_K262DRA...regi<br>on1  | NRPS        |
|                                   |                |    | CYP107NH1 | 2540348496.c00006_K262DRA...regi<br>on1  | T2PKS       |
|                                   |                |    | CYP247A8  | 2540348493.c00003_K262DRA...regi<br>on3  | NRPS        |
|                                   |                |    | CYP107Z27 | 2540348493.c00003_K262DRA...regi<br>on3  | NRPS        |
|                                   |                |    | CYP211C1  | 2540348494.c00004_K262DRA...regi<br>on1  | T2PKS       |
|                                   |                |    | CYP208A22 | 2540348494.c00004_K262DRA...regi<br>on4  | T1PKS       |
|                                   |                |    | CYP107AW1 | 2540348496.c00006_K262DRA...regi<br>on2  | Bacteriocin |

|                                     |            |    |           |                                     |                 |
|-------------------------------------|------------|----|-----------|-------------------------------------|-----------------|
|                                     |            |    | CYP107AY1 | 2540348497.c00007_K262DRA...region2 | NRPS            |
|                                     |            |    | CYP1004B1 | 2540348506.c00016_K262DRA...region1 | NRPS            |
|                                     |            |    | CYP1004A1 | 2540348506.c00016_K262DRA...region1 | NRPS            |
|                                     |            |    | CYP125G1  | 2540348506.c00016_K262DRA...region1 | NRPS            |
|                                     |            |    | CYP107E3  | 2540348528.c00038_K262DRA...region1 | T1PKS           |
| <i>Salinispora arenicola</i> CNY234 | 2519103195 | 12 | CYP1051A1 | 2519124107.c00002_F584DRA...region1 | Terpene         |
|                                     |            |    | CYP211C1  | 2519124108.c00003_F584DRA...region4 | T2PKS           |
|                                     |            |    | CYP166A4  | 2519124110.c00005_F584DRA...region2 | T1PKS           |
|                                     |            |    | CYP105W2  | 2519124112.c00007_F584DRA...region1 | oligosaccharide |
|                                     |            |    | CYP248A2  | 2519124112.c00007_F584DRA...region1 | oligosaccharide |
|                                     |            |    | CYP107FS2 | 2519124112.c00007_F584DRA...region1 | oligosaccharide |

|                                   |            |    |                    |                                     |                 |
|-----------------------------------|------------|----|--------------------|-------------------------------------|-----------------|
|                                   |            |    | CYP105CN1          | 2519124112.c00007_F584DRA...region1 | oligosaccharide |
|                                   |            |    | CYP105CP2          | 2519124112.c00007_F584DRA...region1 | oligosaccharide |
|                                   |            |    | CYP245A7           | 2519124114.c00009_F584DRA...region1 | Indole          |
|                                   |            |    | CYP244A4           | 2519124114.c00009_F584DRA...region1 | Indole          |
|                                   |            |    | CYP107AY2-fragment | 2519124115.c00010_F584DRA...region1 | NRPS            |
|                                   |            |    | CYP208A12          | 2519124117.c00012_F584DRA...region1 | T1PKS           |
| <i>Salinispora tropica</i> CNT250 | 2540341193 | 11 | CYP163B1           | 2540348645.c00001_K261DRA...region1 | NRPS            |
|                                   |            |    | CYP154M1           | 2540348646.c00002_K261DRA...region2 | NRPS            |
|                                   |            |    | CYP208A4           | 2540348646.c00002_K261DRA...region2 | NRPS            |
|                                   |            |    | CYP211C1           | 2540348646.c00002_K261DRA...region4 | T2PKS           |
|                                   |            |    | CYP107AY1          | 2540348648.c00004_K261DRA...region2 | NRPS            |

|                                    |            |   |           |                                     |             |
|------------------------------------|------------|---|-----------|-------------------------------------|-------------|
|                                    |            |   | CYP107AW1 | 2540348649.c00005_K261DRA...region1 | Bacteriocin |
|                                    |            |   | CYP1004B1 | 2540348659.c00015_K261DRA...region1 | NRPS        |
|                                    |            |   | CYP1004A1 | 2540348659.c00015_K261DRA...region1 | NRPS        |
|                                    |            |   | CYP125G1  | 2540348659.c00015_K261DRA...region1 | NRPS        |
|                                    |            |   | CYP113E1  | 2540348662.c00018_K261DRA...region2 | T1PKS       |
|                                    |            |   | CYP107E3  | 2540348677.c00033_K261DRA...region1 | T1PKS       |
| <i>Salinispora pacifica</i> CNR510 | 2571042008 | 7 | CYP107AW7 | 2571043004.c00005_T377DRA...region2 | Bacteriocin |
|                                    |            |   | CYP107AY9 | 2571043021.c00022_T377DRA...region1 | terpene     |
|                                    |            |   | CYP161N4  | 2571043023.c00024_T377DRA...region1 | T3PKS       |
|                                    |            |   | CYP2054A3 | 2571043023.c00024_T377DRA...region1 | T3PKS       |
|                                    |            |   | CYP107FH3 | 2571043023.c00024_T377DRA...region1 | T3PKS       |

|                                     |            |    |            |                                     |           |
|-------------------------------------|------------|----|------------|-------------------------------------|-----------|
|                                     |            |    | CYP208A22  | 2571043030.c00031_T377DRA...region1 | T1PKS     |
|                                     |            |    | CYP107E37  | 2571043063.c00064_T377DRA...region1 | T1PKS     |
| <i>Salinispora arenicola</i> CNT800 | 2515154088 | 21 | CYP208A12  | 2515161955.c00001_B040DRA...region2 | T1PKS     |
|                                     |            |    | CYP107AY2  | 2515161960.c00006_B040DRA...region1 | NRPS      |
|                                     |            |    | CYP245A7   | 2515161961.c00007_B040DRA...region1 | Indole    |
|                                     |            |    | CYP244A4   | 2515161961.c00007_B040DRA...region1 | Indole    |
|                                     |            |    | CYP166A4   | 2515161962.c00008_B040DRA...region1 | T1PKS     |
|                                     |            |    | CYP107AX13 | 2515161962.c00008_B040DRA...region2 | ladderane |
|                                     |            |    | CYP154M15  | 2515161964.c00010_B040DRA...region1 | ladderane |
|                                     |            |    | CYP125G6   | 2515161964.c00010_B040DRA...region1 | ladderane |

|  |  |  |           |                                     |           |
|--|--|--|-----------|-------------------------------------|-----------|
|  |  |  | CYP107FS2 | 2515161964.c00010_B040DRA...region1 | ladderane |
|  |  |  | CYP105CN1 | 2515161964.c00010_B040DRA...region1 | ladderane |
|  |  |  | CYP105CP2 | 2515161964.c00010_B040DRA...region1 | ladderane |
|  |  |  | CYP105CH1 | 2515161967.c00013_B040DRA...region2 | T1PKS     |
|  |  |  | CYP1051A1 | 2515161968.c00014_B040DRA...region1 | Terpene   |
|  |  |  | CYP105G5  | 2515161968.c00014_B040DRA...region2 | T1PKS     |
|  |  |  | CYP107Q4  | 2515161968.c00014_B040DRA...region2 | T1PKS     |
|  |  |  | CYP211C1  | 2515161972.c00018_B040DRA...region  | T2PKS     |
|  |  |  | CYP154M21 | 2515161974.c00020_B040DRA...region1 | NRPS      |
|  |  |  | CYP154M13 | 2515161974.c00020_B040DRA...region1 | NRPS      |
|  |  |  | CYP105W2  | 2515161974.c00020_B040DRA...region1 | NRPS      |

|                                    |            |    |            |                                     |             |
|------------------------------------|------------|----|------------|-------------------------------------|-------------|
|                                    |            |    | CYP248A2   | 2515161974.c00020_B040DRA...region1 | NRPS        |
|                                    |            |    | CYP154M20  | 2515161974.c00020_B040DRA...region1 | NRPS        |
| <i>Salinispora pacifica</i> CNS055 | 2518285562 | 10 | CYP107AW8  | 2518290980.c00001_C550DRA...region6 | Bacteriocin |
|                                    |            |    | CYP162H1   | 2518290980.c00001_C550DRA...region8 | NRPS        |
|                                    |            |    | CYP1611B1  | 2518290987.c00008_C550DRA...region1 | T1PKS       |
|                                    |            |    | CYP2098A1  | 2518290987.c00008_C550DRA...region1 | T1PKS       |
|                                    |            |    | CYP1004B3  | 2518290997.c00018_C550DRA...region1 | NRPS        |
|                                    |            |    | CYP1004A4  | 2518290997.c00018_C550DRA...region1 | NRPS        |
|                                    |            |    | CYP125G4   | 2518290997.c00018_C550DRA...region1 | NRPS        |
|                                    |            |    | CYP107AY12 | 2518290998.c00019_C550DRA...region1 | NRPS        |
|                                    |            |    | CYP162J1   | 2518291009.c00030_C550DRA...region1 | NRPS        |



|                                     |            |    |           |                                     |                 |
|-------------------------------------|------------|----|-----------|-------------------------------------|-----------------|
|                                     |            |    | CYP107E38 | 2518291018.c00039_C550DRA...region1 | T1PKS           |
| <i>Salinispora arenicola</i> CNS051 | 2518285553 | 10 | CYP211C1  | 2518290242.c00003_C570DRA...region1 | T2PKS           |
|                                     |            |    | CYP245A7  | 2518290244.c00005_C570DRA...region1 | Indole          |
|                                     |            |    | CYP244A4  | 2518290244.c00005_C570DRA...region1 | Indole          |
|                                     |            |    | CYP166A4  | 2518290245.c00006_C570DRA...region2 | T1PKS           |
|                                     |            |    | CYP105W2  | 2518290246.c00007_C570DRA...region1 | oligosaccharide |
|                                     |            |    | CYP248A2  | 2518290246.c00007_C570DRA...region1 | oligosaccharide |
|                                     |            |    | CYP107FS2 | 2518290246.c00007_C570DRA...region1 | oligosaccharide |
|                                     |            |    | CYP105CN1 | 2518290246.c00007_C570DRA...region1 | oligosaccharide |
|                                     |            |    | CYP105CP2 | 2518290246.c00007_C570DRA...region1 | oligosaccharide |
|                                     |            |    | CYP208A12 | 2518290248.c00009_C570DRA...region1 | T1PKS           |

|                                     |            |    |                    |                                     |           |
|-------------------------------------|------------|----|--------------------|-------------------------------------|-----------|
| <i>Salinispora arenicola</i> CNB527 | 2515154093 | 21 | CYP208A12          | 2515162172.c00001_B033DRA...region1 | T1PKS     |
|                                     |            |    | CYP2296A2          | 2515162173.c00002_B033DRA...region1 | T2PKS     |
|                                     |            |    | CYP166A4           | 2515162173.c00002_B033DRA...region1 | T2PKS     |
|                                     |            |    | CYP173K1           | 2515162173.c00002_B033DRA...region1 | T2PKS     |
|                                     |            |    | CYP245A7           | 2515162174.c00003_B033DRA...region1 | Indole    |
|                                     |            |    | CYP244A4           | 2515162174.c00003_B033DRA...region1 | Indole    |
|                                     |            |    | CYP166A4           | 2515162177.c00006_B033DRA...region1 | T1PKS     |
|                                     |            |    | CYP107AX-fragment7 | 2515162177.c00006_B033DRA...region2 | ladderane |
|                                     |            |    | CYP154M5           | 2515162182.c00011_B033DRA...region1 | terpene   |
|                                     |            |    | CYP211C1           | 2515162183.c00012_B033DRA...region1 | T2PKS     |
|                                     |            |    | CYP105CP2          | 2515162187.c00016_B033DRA...region2 | NRPS      |

|                                      |           |    |                   |                                     |                 |
|--------------------------------------|-----------|----|-------------------|-------------------------------------|-----------------|
|                                      |           |    | CYP105CN1         | 2515162187.c00016_B033DRA...region2 | NRPS            |
|                                      |           |    | CYP107FS2         | 2515162187.c00016_B033DRA...region2 | NRPS            |
|                                      |           |    | CYP244A-fragment2 | 2515162191.c00020_B033DRA...region1 | NRPS            |
|                                      |           |    | CYP107AY14        | 2515162191.c00020_B033DRA...region1 | NRPS            |
|                                      |           |    | CYP107EU2         | 2515162195.c00024_B033DRA...region1 | T1PKS           |
|                                      |           |    | CYP248A2          | 2515162196.c00025_B033DRA...region1 | oligosaccharide |
|                                      |           |    | CYP105W3          | 2515162196.c00025_B033DRA...region1 | oligosaccharide |
|                                      |           |    | CYP107Q4          | 2515162200.c00029_B033DRA...region1 | T1PKS           |
|                                      |           |    | CYP105G7          | 2515162200.c00029_B033DRA...region1 | T1PKS           |
|                                      |           |    | CYP1051A4         | 2515162200.c00029_B033DRA...region2 | Terpene         |
| <i>Salinispora arenicola</i> CNS-205 | 641228504 | 22 | CYP208A12         | 641228495.NC_009953.region2         | T1PKS           |
|                                      |           |    | CYP166A4          | 641228495.NC_009953.region6         | T1PKS           |
|                                      |           |    | CYP107Q4          | 641228495.NC_009953.region6         | T1PKS           |

|  |  |  |           |                              |                 |
|--|--|--|-----------|------------------------------|-----------------|
|  |  |  | CYP105G5  | 641228495.NC_009953.region6  | T1PKS           |
|  |  |  | CYP1051A1 | 641228495.NC_009953.region7  | Terpene         |
|  |  |  | CYP105W2  | 641228495.NC_009953.region9  | oligosaccharide |
|  |  |  | CYP248A2  | 641228495.NC_009953.region9  | oligosaccharide |
|  |  |  | CYP107FS2 | 641228495.NC_009953.region10 | NRPS            |
|  |  |  | CYP105CN1 | 641228495.NC_009953.region10 | NRPS            |
|  |  |  | CYP105CP2 | 641228495.NC_009953.region10 | NRPS            |
|  |  |  | CYP244A4  | 641228495.NC_009953.region12 | Indole          |
|  |  |  | CYP245A7  | 641228495.NC_009953.region12 | Indole          |
|  |  |  | CYP211C1  | 641228495.NC_009953.region17 | T2PKS           |
|  |  |  | CYP107EU1 | 641228495.NC_009953.region22 | NRPS-like       |
|  |  |  | CYP1198B1 | 641228495.NC_009953.region22 | NRPS-like       |
|  |  |  | CYP105CH1 | 641228495.NC_009953.region22 | NRPS-like       |
|  |  |  | CYP162A6  | 641228495.NC_009953.region24 | betalactone     |
|  |  |  | CYP107HF1 | 641228495.NC_009953.region24 | betalactone     |
|  |  |  | CYP113S1  | 641228495.NC_009953.region24 | betalactone     |
|  |  |  | CYP107AY2 | 641228495.NC_009953.region26 | NRPS            |
|  |  |  | CYP105CT1 | 641228495.NC_009953.region27 | terpene         |
|  |  |  | CYP154M5  | 641228495.NC_009953.region27 | terpene         |

|                                    |                |    |           |                                         |             |
|------------------------------------|----------------|----|-----------|-----------------------------------------|-------------|
| <i>Salinispora pacifica</i> CNT131 | 251515420<br>0 | 10 | CYP107AW7 | 2515170263.c00002_B172DRA...regi<br>on2 | Bacteriocin |
|                                    |                |    | CYP164C2  | 2515170265.c00004_B172DRA...regi<br>on1 | NRPS        |
|                                    |                |    | CYP208A22 | 2515170281.c00020_B172DRA...regi<br>on1 | T1PKS       |
|                                    |                |    | CYP107FH3 | 2515170283.c00022_B172DRA...regi<br>on1 | NRPS-like   |
|                                    |                |    | CYP2054A3 | 2515170283.c00022_B172DRA...regi<br>on1 | NRPS-like   |
|                                    |                |    | CYP161N4  | 2515170283.c00022_B172DRA...regi<br>on1 | NRPS-like   |
|                                    |                |    | CYP107AY9 | 2515170296.c00035_B172DRA...regi<br>on1 | NRPS        |
|                                    |                |    | CYP244A10 | 2515170296.c00035_B172DRA...regi<br>on1 | NRPS        |
|                                    |                |    | CYP107E37 | 2515170317.c00056_B172DRA...regi<br>on1 | T1PKS       |
|                                    |                |    | CYP107FH4 | 2515170325.c00064_B172DRA...regi<br>on1 | T1PKS       |
| <i>Salinispora pacifica</i> CNT609 | 251757216<br>1 | 7  | CYP244A12 | 2517596856.c00005_C584DRA...regi<br>on2 | NRPS        |

|                                    |           |    |            |                                     |                  |
|------------------------------------|-----------|----|------------|-------------------------------------|------------------|
|                                    |           |    | CYP107AY8  | 2517596856.c00005_C584DRA...region2 | NRPS             |
|                                    |           |    | CYP163B20  | 2517596858.c00007_C584DRA...region1 | transAT-PKS-like |
|                                    |           |    | CYP208A30  | 2517596869.c00018_C584DRA...region1 | T1PKS            |
|                                    |           |    | CYP107AW10 | 2517596870.c00019_C584DRA...region2 | Bacteriocin      |
|                                    |           |    | CYP1207A12 | 2517596888.c00037_C584DRA...region1 | NRPS             |
|                                    |           |    | CYP107E37  | 2517596898.c00047_C584DRA...region1 | T1PKS            |
| <i>Salinispora tropica</i> CNB-440 | 640427140 | 11 | CYP113E1   | 640427133.NC_009380.region1         | T1PKS            |
|                                    |           |    | CYP163B1   | 640427133.NC_009380.region4         | transAT-PKS-like |
|                                    |           |    | CYP107AW1  | 640427133.NC_009380.region7         | Bacteriocin      |
|                                    |           |    | CYP211C1   | 640427133.NC_009380.region10        | T2PKS            |
|                                    |           |    | CYP208A4   | 640427133.NC_009380.region12        | NRPS             |
|                                    |           |    | CYP154M1   | 640427133.NC_009380.region12        | NRPS             |
|                                    |           |    | CYP107E3   | 640427133.NC_009380.region13        | T1PKS            |
|                                    |           |    | CYP125G1   | 640427133.NC_009380.region13        | T1PKS            |
|                                    |           |    | CYP1004A1  | 640427133.NC_009380.region13        | T1PKS            |

|                                     |                |    |                    |                                     |                 |
|-------------------------------------|----------------|----|--------------------|-------------------------------------|-----------------|
|                                     |                |    | CYP1004B1          | 640427133.NC_009380.region13        | T1PKS           |
|                                     |                |    | CYP107AY1          | 640427133.NC_009380.region17        | NRPS            |
| <i>Salinispora arenicola</i> CNY690 | 256151111<br>1 | 21 | CYP211C1           | 2561539429.c00003_T393DRA...region2 | T2PKS           |
|                                     |                |    | CYP244A4           | 2561539430.c00004_T393DRA...region1 | Indole          |
|                                     |                |    | CYP245A7           | 2561539430.c00004_T393DRA...region1 | Indole          |
|                                     |                |    | CYP107AX-fragment8 | 2561539434.c00008_T393DRA...region1 | ladderane       |
|                                     |                |    | CYP105W3           | 2561539435.c00009_T393DRA...region1 | oligosaccharide |
|                                     |                |    | CYP248A2           | 2561539435.c00009_T393DRA...region1 | oligosaccharide |
|                                     |                |    | CYP107FS2          | 2561539435.c00009_T393DRA...region1 | oligosaccharide |
|                                     |                |    | CYP105CN1          | 2561539435.c00009_T393DRA...region1 | oligosaccharide |
|                                     |                |    | CYP105CP2          | 2561539435.c00009_T393DRA...region1 | oligosaccharide |
|                                     |                |    | CYP105CT2          | 2561539436.c00010_T393DRA...region1 | terpene         |

|  |  |  |                   |                                     |         |
|--|--|--|-------------------|-------------------------------------|---------|
|  |  |  | CYP154M5          | 2561539436.c00010_T393DRA...region1 | terpene |
|  |  |  | CYP208A12         | 2561539442.c00016_T393DRA...region1 | T1PKS   |
|  |  |  | CYP107EU2         | 2561539448.c00022_T393DRA...region1 | T1PKS   |
|  |  |  | CYP107AY14        | 2561539454.c00028_T393DRA...region1 | NRPS    |
|  |  |  | CYP244A-fragment2 | 2561539454.c00028_T393DRA...region1 | NRPS    |
|  |  |  | CYP105CH2         | 2561539469.c00043_T393DRA...region1 | T1PKS   |
|  |  |  | CYP105G7          | 2561539476.c00050_T393DRA...region1 | T1PKS   |
|  |  |  | CYP107Q4          | 2561539476.c00050_T393DRA...region1 | T1PKS   |
|  |  |  | CYP166A4          | 2561539482.c00056_T393DRA...region1 | T1PKS   |
|  |  |  | CYP1051A4         | 2561539495.c00069_T393DRA...region1 | Terpene |
|  |  |  | CYP1198B2         | 2561539533.c00107_T393DRA...region1 | T1PKS   |



|                                    |                |    |           |                                         |             |
|------------------------------------|----------------|----|-----------|-----------------------------------------|-------------|
| <i>Salinispora pacifica</i> CNT603 | 251515418<br>5 | 9  | CYP107AW7 | 2515169054.c00002_B175DRA...regi<br>on2 | Bacteriocin |
|                                    |                |    | CYP164C2  | 2515169055.c00003_B175DRA...regi<br>on1 | NRPS        |
|                                    |                |    | CYP208A22 | 2515169081.c00029_B175DRA...regi<br>on1 | T1PKS       |
|                                    |                |    | CYP244A10 | 2515169083.c00031_B175DRA...regi<br>on1 | NRPS        |
|                                    |                |    | CYP107AY9 | 2515169083.c00031_B175DRA...regi<br>on1 | NRPS        |
|                                    |                |    | CYP161N4  | 2515169086.c00034_B175DRA...regi<br>on1 | T3PKS       |
|                                    |                |    | CYP2054A3 | 2515169086.c00034_B175DRA...regi<br>on1 | T3PKS       |
|                                    |                |    | CYP107FH3 | 2515169086.c00034_B175DRA...regi<br>on1 | T3PKS       |
|                                    |                |    | CYP107E37 | 2515169101.c00049_B175DRA...regi<br>on1 | T1PKS       |
| <i>Salinispora pacifica</i> CNY331 | 251864562<br>7 | 10 | CYP208A22 | 2518683836.c00002_C588DRA...regi<br>on1 | T1PKS       |
|                                    |                |    | CYP107AW7 | 2518683839.c00005_C588DRA...regi<br>on2 | bacteriocin |

|                                     |                |    |           |                                         |           |
|-------------------------------------|----------------|----|-----------|-----------------------------------------|-----------|
|                                     |                |    | CYP105H11 | 2518683861.c00027_C588DRA...regi<br>on1 | T1PKS     |
|                                     |                |    | CYP244A10 | 2518683868.c00034_C588DRA...regi<br>on1 | NRPS      |
|                                     |                |    | CYP107AY9 | 2518683868.c00034_C588DRA...regi<br>on1 | NRPS      |
|                                     |                |    | CYP161N4  | 2518683871.c00037_C588DRA...regi<br>on1 | T3PKS     |
|                                     |                |    | CYP2054A3 | 2518683871.c00037_C588DRA...regi<br>on1 | T3PKS     |
|                                     |                |    | CYP107FH3 | 2518683871.c00037_C588DRA...regi<br>on1 | T3PKS     |
|                                     |                |    | CYP247A7  | 2518683873.c00039_C588DRA...regi<br>on1 | NRPS      |
|                                     |                |    | CYP107E37 | 2518683908.c00074_C588DRA...regi<br>on1 | T1PKS     |
| <i>Salinispora arenicola</i> CNT859 | 251757223<br>3 | 13 | CYP211C1  | 2517601328.c00003_D462DRA...regi<br>on1 | T2PKS     |
|                                     |                |    | CYP154M15 | 2517601333.c00008_D462DRA...regi<br>on1 | ladderane |
|                                     |                |    | CYP125G6  | 2517601333.c00008_D462DRA...regi<br>on1 | ladderane |

|                                     |            |    |           |                                     |           |
|-------------------------------------|------------|----|-----------|-------------------------------------|-----------|
|                                     |            |    | CYP107FS2 | 2517601333.c00008_D462DRA...region1 | ladderane |
|                                     |            |    | CYP105CN1 | 2517601333.c00008_D462DRA...region1 | ladderane |
|                                     |            |    | CYP105CP2 | 2517601333.c00008_D462DRA...region1 | ladderane |
|                                     |            |    | CYP208A12 | 2517601335.c00010_D462DRA...region1 | T1PKS     |
|                                     |            |    | CYP166A4  | 2517601338.c00013_D462DRA...region1 | T1PKS     |
|                                     |            |    | CYP1051A1 | 2517601340.c00015_D462DRA...region1 | Terpene   |
|                                     |            |    | CYP105G5  | 2517601340.c00015_D462DRA...region2 | T1PKS     |
|                                     |            |    | CYP107Q4  | 2517601340.c00015_D462DRA...region2 | T1PKS     |
|                                     |            |    | CYP154M21 | 2517601344.c00019_D462DRA...region1 | NRPS      |
|                                     |            |    | CYP154M13 | 2517601344.c00019_D462DRA...region1 | NRPS      |
| <i>Salinispora arenicola</i> CNB458 | 2517572210 | 15 | CYP208A12 | 2517600114.c00003_B162DRA...region1 | T1PKS     |

|  |  |  |                    |                                     |           |
|--|--|--|--------------------|-------------------------------------|-----------|
|  |  |  | CYP211C1           | 2517600115.c00004_B162DRA...region1 | T2PKS     |
|  |  |  | CYP245A7           | 2517600117.c00006_B162DRA...region1 | Indole    |
|  |  |  | CYP244A4           | 2517600117.c00006_B162DRA...region1 | Indole    |
|  |  |  | CYP1051A4          | 2517600118.c00007_B162DRA...region1 | Terpene   |
|  |  |  | CYP107AX-fragment8 | 2517600119.c00008_B162DRA...region1 | ladderane |
|  |  |  | CYP107FS2          | 2517600120.c00009_B162DRA...region1 | NRPS      |
|  |  |  | CYP105CN1          | 2517600120.c00009_B162DRA...region1 | NRPS      |
|  |  |  | CYP105CP2          | 2517600120.c00009_B162DRA...region1 | NRPS      |
|  |  |  | CYP105CT2          | 2517600121.c00010_B162DRA...region1 | terpene   |
|  |  |  | CYP154M5           | 2517600121.c00010_B162DRA...region1 | terpene   |
|  |  |  | CYP105CH2          | 2517600135.c00024_B162DRA...region1 | T1PKS     |

|                                     |            |    |           |                                     |         |
|-------------------------------------|------------|----|-----------|-------------------------------------|---------|
|                                     |            |    | CYP105G7  | 2517600137.c00026_B162DRA...region1 | T1PKS   |
|                                     |            |    | CYP107Q4  | 2517600137.c00026_B162DRA...region1 | T1PKS   |
|                                     |            |    | CYP107EU2 | 2517600138.c00027_B162DRA...region1 | T1PKS   |
| <i>Salinispora arenicola</i> CNH877 | 2519103192 | 23 | CYP208A12 | 2519123878.c00001_F581DRA...region2 | T1PKS   |
|                                     |            |    | CYP211C1  | 2519123882.c00005_F581DRA...region1 | T2PKS   |
|                                     |            |    | CYP245A7  | 2519123884.c00007_F581DRA...region1 | Indole  |
|                                     |            |    | CYP244A4  | 2519123884.c00007_F581DRA...region1 | Indole  |
|                                     |            |    | CYP1051A1 | 2519123885.c00008_F581DRA...region1 | Terpene |
|                                     |            |    | CYP105G5  | 2519123885.c00008_F581DRA...region2 | T1PKS   |
|                                     |            |    | CYP107Q4  | 2519123885.c00008_F581DRA...region2 | T1PKS   |
|                                     |            |    | CYP105CP2 | 2519123887.c00010_F581DRA...region2 | NRPS    |

|  |  |  |             |                                     |                 |
|--|--|--|-------------|-------------------------------------|-----------------|
|  |  |  | CYP105CN1   | 2519123887.c00010_F581DRA...region2 | NRPS            |
|  |  |  | CYP107FS2   | 2519123887.c00010_F581DRA...region2 | NRPS            |
|  |  |  | CYP125G6    | 2519123887.c00010_F581DRA...region2 | NRPS            |
|  |  |  | CYP154M15   | 2519123887.c00010_F581DRA...region2 | NRPS            |
|  |  |  | CYP107AX14P | 2519123888.c00011_F581DRA...region1 | ladderane       |
|  |  |  | CYP166A4    | 2519123889.c00012_F581DRA...region1 | T1PKS           |
|  |  |  | CYP105CH1   | 2519123898.c00021_F581DRA...region1 | T1PKS           |
|  |  |  | CYP154M20   | 2519123900.c00023_F581DRA...region1 | oligosaccharide |
|  |  |  | CYP248A2    | 2519123900.c00023_F581DRA...region1 | oligosaccharide |
|  |  |  | CYP105W2    | 2519123900.c00023_F581DRA...region1 | oligosaccharide |
|  |  |  | CYP154M13   | 2519123900.c00023_F581DRA...region1 | oligosaccharide |

|                                     |            |    |           |                                     |                 |
|-------------------------------------|------------|----|-----------|-------------------------------------|-----------------|
|                                     |            |    | CYP154M21 | 2519123900.c00023_F581DRA...region1 | oligosaccharide |
|                                     |            |    | CYP107EU1 | 2519123905.c00028_F581DRA...region1 | NRPS-like       |
|                                     |            |    | CYP162P1  | 2519123908.c00031_F581DRA...region1 | NRPS            |
|                                     |            |    | CYP107AY2 | 2519123913.c00036_F581DRA...region1 | NRPS            |
| <i>Salinispora arenicola</i> CNS673 | 2519103185 | 17 | CYP208A12 | 2519123544.c00003_B127DRA...region2 | T1PKS           |
|                                     |            |    | CYP154M5  | 2519123545.c00004_B127DRA...region1 | T1PKS           |
|                                     |            |    | CYP105CT1 | 2519123545.c00004_B127DRA...region1 | T1PKS           |
|                                     |            |    | CYP107AY2 | 2519123545.c00004_B127DRA...region2 | NRPS            |
|                                     |            |    | CYP211C1  | 2519123546.c00005_B127DRA...region1 | T2PKS           |
|                                     |            |    | CYP245A7  | 2519123547.c00006_B127DRA...region1 | Indole          |
|                                     |            |    | CYP244A4  | 2519123547.c00006_B127DRA...region1 | Indole          |

|  |  |  |           |                                     |                 |
|--|--|--|-----------|-------------------------------------|-----------------|
|  |  |  | CYP105W2  | 2519123549.c00008_B127DRA...region1 | oligosaccharide |
|  |  |  | CYP248A2  | 2519123549.c00008_B127DRA...region1 | oligosaccharide |
|  |  |  | CYP107FS2 | 2519123549.c00008_B127DRA...region1 | oligosaccharide |
|  |  |  | CYP105CN1 | 2519123549.c00008_B127DRA...region1 | oligosaccharide |
|  |  |  | CYP105CP2 | 2519123549.c00008_B127DRA...region1 | oligosaccharide |
|  |  |  | CYP1051A1 | 2519123553.c00012_B127DRA...region1 | Terpene         |
|  |  |  | CYP105G5  | 2519123553.c00012_B127DRA...region2 | T1PKS           |
|  |  |  | CYP107Q4  | 2519123553.c00012_B127DRA...region2 | T1PKS           |
|  |  |  | CYP105CH1 | 2519123561.c00020_B127DRA...region1 | T1PKS           |
|  |  |  | CYP107EU1 | 2519123566.c00025_B127DRA...region1 | T1PKS           |

At the JGI IMG/M database, two strains of *Salinispora arenicola* CNH996 are available. Thus we provided the genome ID available for one species. The second species is indicated with B at the end of its name.



Information on species with no smBGCs

| Genome Name / Sample Name                 | Genome ID  |
|-------------------------------------------|------------|
| <i>Salinispora arenicola</i> CNY685       | 2563366734 |
| <i>Salinispora arenicola</i> CNY230       | 2561511115 |
| <i>Salinispora arenicola</i> CNQ884       | 2561511039 |
| <i>Salinispora pacifica</i> CNY498        | 2563366539 |
| <i>Salinispora pacifica</i> CNY703        | 2563366517 |
| <i>Salinispora arenicola</i> ATCC BAA-917 | 2548876908 |
| <i>Salinispora arenicola</i> CNR921       | 2515154203 |
| <i>Salinispora pacifica</i> CNT851        | 2517572162 |
| <i>Salinispora pacifica</i> CNT124        | 2517572159 |
| <i>Salinispora pacifica</i> DSM 45544     | 2517287019 |
| <i>Salinispora pacifica</i> CNY646        | 2563366531 |
| <i>Salinispora pacifica</i> CNY673        | 2563366533 |
| <i>Salinispora arenicola</i> CNY281       | 2561511103 |
| <i>Salinispora pacifica</i> CNR909        | 2561511038 |
| <i>Salinispora arenicola</i> CNY244       | 2561511110 |
| <i>Salinispora tropica</i> CNY681         | 2561511108 |
| <i>Salinispora arenicola</i> CNH718       | 2561511105 |
| <i>Salinispora arenicola</i> CNY679       | 2561511113 |
| <i>Salinispora arenicola</i> CNT-088      | 2548876909 |
| <i>Salinispora pacifica</i> CNY666        | 2563366532 |
| <i>Salinispora tropica</i> CNY678         | 2561511109 |
| <i>Salinispora pacifica</i> CNY363        | 2563366534 |
| <i>Salinispora arenicola</i> CNY486       | 2561511107 |



Table S2: P450 sequences identified and annotated in *Salinispora* species. Each P450 is presented with its assigned name followed by gene ID (in parenthesis) and species name

### Full-length P450s

>CYP166A4 (2519873113) *Salinispora arenicola* CNR107

MTDAISFELPWARTDKFDPPAVFDALREQRPLARMRYPDGHVGVIVSSYE  
LVREVLGDPRFSSHSCAVGHFPVTHQGQVIPTHPQIPGMFIHMDPPEHTRY  
RRLLTGEFTVRRTSRLTGHVEGVATEQIEVMREHGAPADLVATFARPLVL  
RVLSGLVGLPYGERDRYLHAVTLLHDAEADPAEAAAAAYEQAGAYFDEVIE  
RRRRQPEDDLISTLVGDGELTGEELRNIVTLLLFAGYETTESALAVGMFA  
LLHHEDQLARLRADPTKIDAAIEELLRYLTVNQYHTYRTASEDIELHGEV  
INKGDSVTVSLPAANRDPARFACPAELDIDRETSGHVAFGFGIHCCLGQN  
LARVELRAGLSALLRAFPNRLRLAVPADEVPLRLQGSVFAVKNLPVCW

>CYP105BL2 (2519874224) *Salinispora arenicola* CNR107

MSSHSAAPDPETATPLHTLAPELTFPQFERSTPFDPPQAYTELSGRCPV  
APVSMADGKPSWLITSFEGVRTTSLDPRFSSDMSHPGFNRTGKPVDDL  
KDTLGAMDGERHRYRRLMTGELTVRRAKAMRPVITQITDEALDQLAAAG  
PGADLVKHVAFVVPSPRVACHLVGIPLSYELFTGMAATLMDSTSSDDQFA  
ALQNMVSYFDTLVTDREHHDRDDLGHMVRRYLATGELTRDMLIRLAWTT  
MAAGQETTAHMIGLGVAALLRHPDQLELLRREPHLLPGAVDELMRYLPLI  
QFGIPRVAMDDVEVDGQTVTAGEGVVALPPLANRDPVFERPDELDVRRN  
ARQHLTFGYGPHQCPAHALARLELEVYGRLLERFPTLRLADSDADLKVQ  
DKDIMYRVSELAVTW

>CYP105AB8 (2519874485) *Salinispora arenicola* CNR107

MTETASSRLTDTEFPVQRECPFAEPVEYEQIREQSSIAMVRLTGGGEAWW  
ISGHEQGRAVLADRRFSSDRKANFPFVSTDPAIRKRLHAQPLSLISMDG  
AEHTQARRALIGEFTVRRLAALRPRIQQIVDQCIDEMLTDDQHRADLVKA  
LSLPVPSLVICELLGVADHDFFQEHTATLVRRNTASEVRQHSIDELNA  
YLGALIDRKLASPDDDLGRQIARQHRDGTFRSSMVSLAFLLLVAGHET  
TANMISLGVVGLLQHPEQLAMIKDDPKTPLAIEELLRFFTIVDSVTSRV  
ATEDVRFGDTTINAGDGVVVSGLSADWDPTVFADPDRLDLERGARHHLAF  
GFGPHQCLGQNLARLELQIVFDTLFHRIPTLRLAAPLDKIPFKTDAAIYG  
ARELPVAW

>CYP211C1 (2519874594) *Salinispora arenicola* CNR107

VVDVEELLTRLISAQGRQDPFPVYADLHAQGPIAALPPEPERRRVAAVAV  
GYDLVGAVLRDPEWSKAPPPGWTEQEILRTLQTSMMFINPPDHGRMRHVF  
AGTFTPRRLGALEPVVNRVADELDRMADAGAGGLDFVAEFAYPLPARVM  
AEFIGIPETELDWYRERVDVIDAFLDVAGKTPQRLAAANAAGAELEAFYG  
ELLARRRRTPGEDLISGLVEAVDAGGVELTEDELVSNLIVLFNASFVTTV  
YMLSNGLPVLLAHPEVAAAALATDPVLTAGAVDEILRLQAPVHLLARAAPR  
DTVLGGVPIPGQQNVLLLLIAAANRDPAHFPDPDRFDPWRSGPPSLAFGLG  
LHYCLGAAVSRLEGRALPRLLSRFPRLRIMEQPVYSGSLFLRGIDKLSV  
SPGEGSTRE

>CYP1005A1 (2519875045) *Salinispora arenicola* CNR107

VS AVLF RSWTKTAGTRWPDVTRVADQSGTEHLVVTRHALVRQVLT DQATY  
RPD NAL EAVTPVPVAALRVLAGHRFRLLPPTLANNGGASHPAIRALVADAL  
HPTKVAAQRPWLTGLVADRVASIRTTLDSSGGPVDLYADLTADLPLLVLAR  
LVELPDAPVNAV KQFARA ALELFWAPLDADRQLALADEVGRFHQVLR EFA  
DTGGGLAAALRATGHSPDVLVGALFFLLVAGQETTSQFLTLLHRLSGEP  
TIRAALRAGSSSVADVVEEGLRLEPPIVTWRRVAAVDSTLGGTTVAAGTS  
VLLW LARAGRDP AVVAAPDEF RPPGQ RGSRRHLAFGAGAHRC LGDQLARME  
AAVVVEQATPLLDGVTVVRPPWYPDNLTFRMPDAFVVRR

>CYP208A12 (2519875628) *Salinispora arenicola* CNR107

MTLDTITPRVPLGPPRTAALRMLLVMKRDRLGMLTSAAARYGDASRLPVG  
HKALWFFNHPRYAKHVLADNSANYHKGIGLVHARRALGDGLLTSEGD LWR  
KQRKVIQPAFQSRRIAQQAGMIAEEAFALVERLRARAGAGPVELTAE L TG  
LTLGVLGRSLLDADLAGFDSIGDSFATVQDQAMFELET LNAVPMWIPLPR  
QIRFRARRRKLQAVVDTLVDGRAGNLADRVDVLSRLILSARGEADPRVGR  
ERLRDELVTLLLAGHETTASTLGWTL SLIDRH PGVWERLHAEAVEVLGDR  
LPEYDDLRLRLRYTVMVVEEAMRLFPPVWLLPRRALAPDTIGEYRVPANAD  
VVISPYTLHRHPEFWPNPERFDPERFAPGQAADRPRYAYLPFGAGPRFCV  
GNNLGMMEAVFVIALLCRHLRLTGVPGYRLVPEPMLSLRIRGGGLPLVVRP  
VS

>CYP245A7 (2519876214) *Salinispora arenicola* CNR107

MPSATLPRFALTGWSRENIVNPYPVYQRYREVASVHRGESGGDAPDTFYV  
FSYDEVVQVLSSNCFGRGRSLDAAKASVPVPAEQKALRAIVENWLVFMDP  
PRHTELRSLLNRSFSPRIVTEL RPRIARIAQELL SRLGQQVDVDLVE SFA  
APLPILVISELLGIPEERRAWLRANALALQEASSSRAGRDVDGYARAEVA  
AQEFTEYFREQVRLRRGRAGGDLITILANAQERGAPVSLDAIVGTCVHLL  
TAGHETTTNSLAKAVLALREHPAVLDEL RGA EGLTTDAVEEFLRYDPPVQ  
AVTRWAHQD T TLGGCDIPRGSRVVALLGSANRDPARFPSPDVL DVRRPAD  
RHLSFGLGIHYCLGATLARA E L EIGLQALLDGVP T L GYGTQHVDYADDLV  
FHGPSRLVLVNLGERCT

>CYP244A4 (2519876218) *Salinispora arenicola* CNR107

MSTTTNTELTEAPETNMPVDPLGDFDCMPDLIAAARVAPVVRIPYLGRHAW  
VVC DREL VKQAL THPKMGKDIALVPEWMRQPGLMVTAQPDPEYARAMIMS  
DGENHARIRRIHAPVLSRNTERWGERVADKVEGF LDELSQAGSGGSTEV  
NVVTNYTHKIPLAFISEMLGLPPEAEHRLRGITDIMLYSSDYAARREAITG  
GLFGAVEDWVRNPADLRDGVITGLLAASDGPDAAVTEGEVIVWTLGMIIT  
GYETTGS LISTS LYEAI RPPHERPKTDEDITAWIEETLRVHPPFPHPHTW  
RFPLEDIELGGYLIPKGAPVQVSIAAANRKPGE GADSFDAERRGHGHLSF  
GLGMHYCIGAPLVRLEAQIAVRGFLRRFPQARLSAETAVQWESEWMIRRM  
SVLPAVLS

>CYP1051A1 (2519876836) *Salinispora arenicola* CNR107

MATDAAITRARTVPAWKALPAAVRDTHRAFVDVGNWSDGDVVRVSLGVSR  
PYLVTNPAHVQEVLHERAAIYPRGDDTALWRSVRKLVGDGILAE GDAWAA  
SRRVLAPMFRPARINAMVDTMADA IAGAVDDLHGAATAGT PIDVGRELSR  
IVCSAIMRVFFADRITVRDALRIMKAQETIVTAMAPRILAPLVPWWIPMP  
GDRRFRAAVRSID DILLPVLRQAQRQPDDGDDLLSRLVRARADDGRALSE  
KRM RDDLVSMVAVTTETSTVVL TWLWPLL ANHPDVANRLYDEIDRVVGGG  
PVRGDHLAELTYTRMVLD ELLRLYPAGWILPRRAATTDVLGGVRINKGAT  
VILSPYVTQRM TAWWGPTAEAFDPERFAAGREAADGRHRYAYYPFGVGMH

RCLGEHLFNLEAILIVATLLSRFRFALTDTSMPGVKVAASTRPARTVEMI  
LKPVAPVPAR

>CYP105G5 (2519876858) *Salinispora arenicola* CNR107

LTIIETTETPPADDSLRAPLPRQFMQRDDPSKLPALAAAEQSPVGRSTL  
PDGDPFWMVSGYDEARAVLSDPRFSSDRFRYHPRFKKLSGQLGERLRNDK  
ARAGSFNMDPPEHTRYRKLLTGQFTVRRMRQLTVRIEQIVTEQVDVMLA  
EGNSADLVSAFAVPVPSLMICELLGVRYEDRTEFQORRAAGLLQTDLPKQ  
AVENLEAQRAFMQRLVTDKRRTPADDMISGLVHHAGAEPPLTDDELVGIA  
TLLLFLAGLDTTASMLGLGMFMLLQRPEQMAVLRDDPSRIGDAVEELLRYL  
TVVSTGLFRFAKEDVVLGDEHIFAGSTVVVSLMAANRDGRHWPEPETLDV  
TRVRSSHLAFGHGVHQCLGQQRLARIELTVGITELLRRLPNVRLAVPPADV  
PLRNDMITYGVHRLPILWDTF

>CYP107Q4 (2519876859) *Salinispora arenicola* CNR107

MTTTAETSATIDLFSPEVVADPFGWYARLREETGPTTGTLNIGTMMGGP  
EMWLVTTRYEDVRQVLTDPRFLTNPADSPLEDIRAGVFKRLDFPPDLIPW  
MANLLNVSDGEDHTRLRKLVSALTAHRIGKLRPRVEKITADLLDKLAED  
GKDGSPVDLVEEYCYPLPVTVICELVGIDEPRPHWRAWGDSMATMNGER  
IPTTLVKCIELARELIAKRAEPQDDLVLTALVQAQAEQONRVSDDEIIGI  
LFSLVTAGHQTTTYLIGNSVILLLENPDQLARLKENPSMWPQAVRELQRL  
GPIQFAQPRFPSEDIELGGVTIPRGAPVAPLLAANTDPRRFPDPNKLI  
DRLAVGSEHGLGFGKGIHRCLGQHLAYQEAVALQGLFTRFPDLSLAVPR  
EEIPWILRPGFTRTRTLPLKLV

>CYP154M5 (2519876900) *Salinispora arenicola* CNR107

VEQSCPYKLDVTGRDVHAEGEAIRARGPVAQVELPGGVQGSVTGYQAAR  
QVLADPRFAKDPKKWPAYTSGAIPPNWPLIGWLLMDNMTTNDGADHQRLR  
KLVSHGFTPRQVERTRPLIVKIVNDLLDGLSSAGPDEVVDLKGRFATPLP  
ARVICDMFGVPEALRASVLRGAQVNVTSISGEEAEANVEQWHRELLELV  
EAKREKPDDEMASLLIAAKEEDGSTLTQEEVVGTLLHMLGAGSETLMNAL  
SYAVLGMLSNPGQYEMVRNGTSSWDDVIEETLRAQAPVAQLPLRYATEDV  
AVGGAVIKAGDPVLMGFTAIGRDPVHGETAGDYDITREDKTHLSFGHGV  
HFCLGAPLARLELKIALPALFERFPNMTLAVRPDQLEPQGTFFIMNGHREL  
PVRLGQPATVLA

>CYP105CP2 (2519877182) *Salinispora arenicola* CNR107

MTKSMPVQDLPAFFIPRECPYRPSAQHVSLRSGGPMKVRVLYNGRTAWLV  
TDSAHARAVLSDYRRVSIKPYHGNYPLLNEEFKVVDSGYADVLFVGDPP  
EHTRQRQMIMPSFTLRRRTAVLRPDIQRIVDDKLDMMRHGAPGDLVTEFA  
QPVPMSVMSFLLGVPWEDHEEFETPAHKLFVPELAEEATELGAYLERLI  
QKKEQPGGTPGGTGLLDDLIIRDHLRAGALSRDELVHIAMAMLVAGTDTT  
NVISLGTALALLDNPQWAAALRDNPDDELIPGAVEEILRYTSLIEAFARVAV  
SDIELNGAVIKEGEGILISSAGVNFDPALAPDPGRFDIRPPRPSFSFSH  
GIHRCPGDNLARLELEIAFRSLVTRMPNLRATAKPIDQIPSNNDGTLQRL  
YELPVVW

>CYP105W2 (2519877313) *Salinispora arenicola* CNR107

MTGYQDRPTGDQPGAPVPSGSTDPGIGAFPLPRRCFSPPAEYARLRAEH  
PVVRLPMLGGDTAWVVSRAHADVRLSDPRMSADRRRPGFPKFAPTTEGQ  
RQASFANFRPPLNWLDPPEHAICRRQIVDEFSVRRVRQSRALVERVVDTH  
LDALTAAPGADLVSTFAYPVPSQVICEVLGVYPYGEHEFFERRSTLMFRR

STPADERARCAREIRDFLDVVVTDKERRPGDDVLSRLLYRQRRAGGVDHE  
AVVSMAFVLLVAGHVTTSNMIALSVLALLTHPARLARLRAEPERFPAAVE  
ELLRYFTVVEAATARTTTAEVTIGGVTTAAGEGVVALGQAANRDP RVFEH  
PDEFDPDRDARAHAFGHGRHICPGQHLARLEMEVALSRLFRRLPGLRLT  
MEVSDLPLKEDSNIFGLYALPVAW

>CYP105J3 (2519877756) *Salinispora arenicola* CNR107

MTDSVAFPQGRVCPHQAPGYRPLAVQRPLAQVTLYDGRRVWAVTTRDLA  
RRLLVDPRISSDRTNPAWPAIVPIVAAAVNDAQQKVLKIATLVGTDGPE  
HKAQRKMLIPSFTRRMNALRPMIQEIVDQQLDEMIKSGAPTDLIPAFAS  
AVPVTVLYRLMGIPDDDHGIFEKLSHQLLAGPNANEAYDQLMGYMSRLIA  
ERRRNPGEGLVDDLLAQHGANDDADHDELVSTLVVQVAGNHGTTGSMIAL  
GLFALLQHPEQLAELRADPSLMPTAVDELLRFLSVPDAVTRLAADDIEVE  
GTIIRQGDGVFFITSLINRDTDVHDAPNSLGWHHASAADHLTFGFGAHQC  
LGQSLARITMEIALGALIDRLPSRLAVPAEEVPFLPAASLQVIAELPIT  
W

>CYP211B2 (2519877904) *Salinispora arenicola* CNR107

MDVSEAI AVLISPSGRLDPYPTYEQ LRAHG PVSQTTAGLFVVTGYAEADM  
VLRDPRFVVLDDDLRDDVFPHWQDSPAIKSIARSMLRTNPPDHSRIRRLA  
AGAFTPRRVAAMREVVTAQADELVDEMIRAGRDGARVDFMDMFAYPLPVA  
VICALLGVPAADRSRFRRWAGDLTGILEPEITPEELAGADAGADELRDYF  
TGLIEQRRRAPADDLTALVQAHDADGDRLSGEELLANLVVLLVAGFETT  
TNLLGNGLVVLTRPEAAAALRDEPD LAPGYVDELLRYDSPVQLTTRTVR  
ESVSFAGTELPADSWLLVLLGAANRDP RRFDPARFDPGRAQSQPLSFGA  
GPHYCLGAGLARLEAQVAFPLLLRRLPELALAGRPSRRTRLTLRGYETLP  
ITVGAVTADRGT PAGVAPGTP

>CYP125A41 (2519874742) *Salinispora arenicola* CNR107

MTEPRIPAGFDFTDPEVL AHRVPREEF AELRR TAPVWWNAQPRGSAGFDD  
DGYWVVTRYADVMTVSRSDTYSTRENTAIARLRPDTTREDIEMQRVIML  
NVDPP EHTKLRAIVSRGFTPRAINALRGSLAERA EHIVRDAAVRGVGD FV  
TDVACELPLQAI AELIGVPQHRRKVFDWSNQLIGYDDPAYGTDPLTASA  
ELLAYAMEMA EERQ RSPSDDLVTKL VNAQIDGEHLTTDEF GFFVMLLAVA  
GNETTRNAITHGMVAFLDNPEQWELFKAERP KSAVEE IIRWATPVNVFQR  
TALVDTV LGGQAI SAGQRVALFYGSANFDEAVFEDPERFDITRSPNPHLG  
FEGSGAHFCLGANLARLEIELIFNSIADHL PDIRKVAAPQRLRSGWINGI  
RQMPVRYR

>CYP105CT1 (2519876883) *Salinispora arenicola* CNR107

MNSPNHMPADRSLTAPASGCPMALS RGRVGLDVADEISELRDGGRLGRIT  
TAFGQEATLITRYDEVRAQMADSVVFN VAGVPSPPALVDGGFDTESVRRR  
RTVGNLIMLDPPEHTRLRRMVAAWFTTRRVERLRPRVVEIIDAALDEMER  
SGPPVDLVAMFAKTVPITVICELIGVPEELRERYRRRAERAVSASAVSTP  
LDELRLREAGWVSRELIEYHRENPSDDIIGMLLREHGTD SHDDGITDDE  
LVGLANALLIAGHETTTQMLSMGTLALLRHPDQLALLRDDPSIVAGAVEE  
LLRYVGVLHGGFVRVATRDTRLGGHRIHAGELVVPALTAANRDPRLTLDG

>CYP107FS2 (2519877179) *Salinispora arenicola* CNR107

MPVPQGEQNLTTTEVFADPKALFATLGSRQPLHRISLPDGM PAVLVTGNRE  
ARQALSDPRLVRSITAAAPELHKYHPLASDDYALSRHMLFADPPDHGRMR  
KLVSTAFTRRRVEQMRPRIQQITDDLIDVIAAKGEADLVETLALPLPIAV

ISEMLGVPPFADRSEFERHAEVLTGINASSGFDAlIAAGRWFDEYLAELVQ  
QRRREPQDDLI SGMLAAQDKGDRLTDVELRSNALLLSAGFETTVNLVAN  
GLLALLRHPEAMAALRSEPNLMTTAVDELLRYDSPVSCVTYHFAQEPVEI  
GGFKIRSGEHVVIAAAAANHDPTVFADPSRLDLRREGSGQILSFSGIHF  
CLGAPLARLEGEIAFGTVLRRLAGLRLAVPADSLVWKASFVLHRLERLPV  
TFTPDRAPNPIDSVHTV

>CYP105CN1 (2519877180) *Salinispora arenicola* CNR107

MAAPAPQATQSTTPHPPSYPLPRECPYRPSAGTARLRDAGPVSTVRLYDG  
RTAWLVGTAAEARALLADSRVSNRADFPNYPVMDERHLSMRATREMAREE  
EGGFAAALFGMDPPEHTRQRQLLLPRFTVRQVAARRPAIQRIVDEHLDAM  
EANGSPADLVSAFATPVPTMVVCTHLGVYPYQDRTRFEPVAVAGLFEPDRAD  
AAMAELTAYLHQLIETKQSEPGDGVIDHLIANHLRPGAIDRAELVAIASA  
ILVAGTVTTSSAIALGTLALLTAPGQYAALVDNPDLPVGAVNEILRYLSL  
VEQLARVATEDIEIGGKLIRAGDGIIVSFAAGNLDPNVTTTHPDRLDVALP  
PTNHLAFSHGIIHCIGQNLALLELDIAFRALVSRFPTLRLAVPAEQLPITYFAGDVPRLACLPVTW

>CYP248A2 (2519877306) *Salinispora arenicola* CNR107

VLADAVTAFDPTAVDVRRDPYPSYHWLLRHDPVHRGAHQVWYVSRFADVR  
AVLGDERFARTGIRRFWTDLVGPGLLSQIVGDIILFQDEPDHGRLRGVVG  
PAFSPSALRRLEPTIEATVNDLLRPARALGAMDVVADLAYPLALRAVLEL  
LGLPAGDANAVGRWSRAVGRTLDRGATAEDMRRGHAAIAEFADYVERMLA  
ERREDGADLLALMLAAHRSQLMRNEIVSTVVTFIFTGHETVASQLGNGL  
LSLLDHPEQLELMRRQPHLVPAVEECLRFDPVQSNTQRLAADVELHGR  
RLRRDDVVVVLAGAANRDPGRYDRPDELDIRRDPVPSMSFGAGMRYCLGS  
YLARLQLRTALGAMVALPDLRLACSPNELAYQPRMTFRGLTRLFVAFTPAG

>CYP107AY2 (2519877799) *Salinispora arenicola* CNR107

MTAEPTPIPRSGARLGQEYDQLRKTDGVHQVLLPDASLAWLVTNPEVAAR  
ALADPRLALNRRNSRGWSGFALPPALDANLLNLDAPDHTRLRRLVGPAP  
SPQRVAALRPGIRRAAEHLLDTLVATSGPTDLVTGYCNPLSVQVIADLMG  
VPEAGRTNLRWTDMTLTSYPPDRDAIRQAVTELHGYYVDLIDIKQQQPG  
DDLSSALVTIEQDGDRLSRDELTSLAFLILFAGYENTANLIASAVLWLLD  
HGGLNVVPSSEAIEGTLRHEPPAPVAIRRFPTEDIIIGGV TIPAGDTVLL  
SIAAATRGADGNAARLAFNGPHYCLGAALARVEAEEALTVLARRLPGLT  
LAVPPSQVRWRPTFRTHGPAELLVGW

>CYP107AW9 (2561677780) *Salinispora pacifica* CNS801

VETVTGTSAPPPVPYIADPYPTLARIRANGPVSIHLSDEGLPMWVIARYQ  
DVRAALADPRFGQDSRRAQALADNRVAGVTLGGDIVHMLNSDPPDHTRLR  
RHVQGAFTARRVAAMRPLVERITTSLLDGLAGRTTVDLVQDFAFPLPMLV  
ICELLGFPAEERNVYRSWSTAILTHDDPTAFATALREMTDYIAVQLRIR  
QTRPGDDLLTELLAARDAGQLTDDEIIGMVFLLLIGGHETTVNLLGTATL  
ALMRNPDQHRWLLANQPALPEAIDEFLRYESPVAMATLRFTTTTPVAVDDV  
VIPAGELVLVSLGGANRDPDRFPDADRLILNRHDTGHFAFGHGLHRCLGA  
LLGKLEGEVALGALLRRYPRLALAAEVRQLRWRDTIMLRGLES LPVSLHG

>CYP107AX11 (2561677791) *Salinispora pacifica* CNS801

MTSPAPVFDQLLL RDPHRRYNALRDEAPVHHIRTPDGAPAWLVTRYDDV  
RAAFTDPRLSVDKRLSSTDGEHGSSLPELDAHLLNRDPPDHTRLRRFAA  
AAFTPRRVADLRPAVERIVSTLLDGLAGNDHAELIGSLASPLPLQVMQEL  
LGLPTQTSVDFRTWTNTLLSADANQPAQSRSAMASMRRLIEQLAHRAR

PGDDLLTGLLAPHADGDRLSDDELVAMLFLLMFAGYDNTAALIGNVAHAL  
LTNAELAEAVRTGSLAVDELVDGVLRWNPSPFLAVRRFAREFVPTIAGQLI  
PAGDRIWLCLASANRDPAQFTEPDTLGTTGMRCPHLSFGHGIHYCLGAPL  
ARLQTTVAITSLLDRFPGIRLAVPAQDIRWRESFRLRGLVALPVFLSDGC  
GSGGTYG

>CYP1223A5 (2561678741) *Salinispora pacifica* CNS801

MREVGRAVQALFGPAGCAEPYPHYEALRRAAPVCPLPDNIVLVSRYAEAE  
RVIRDPRFLMEDAAWIGQSHPGWTEHPSFRSLMLEMVNHNPPDHARLRRL  
VSRAFTPRRVAELRPAVEQLIDDLDDQMAAREGGTADFMADFALPLPVTV  
IGELLGIPPADRIWFAPRVEAFTDAIEESMRGPSLAEADQAVKELWARLG  
ELADERRRNPRNDMVSELVSVSDSGDDRLSHDELLANLVLLYAAGYETTS  
NLLGNGLAALLERPALKERLRQNPTQASAFVEEMLRFDPPIQIATRYTAQ  
ATTLGGLNIDAGTQIIIVLIGSANRDPDRFADPDEFDPDRADGGSMVFGVG  
AHYCLGAALARMEAEIAFPRLLDRFPAITGHAPGVRRRKSLRGFTQLPIS  
LS

>CYP105AB33 (2561678948) *Salinispora pacifica* CNS801

MTETASITTAGASSTATSGPGSGEVTDAEFPVERGCPFSTPAEYEQIREH  
APLAKVRLTTGREAWWIAGHELARAVLADRRFSSDRRRDNFPFVSTDPET  
RKQLQDQPTSMGLMDGAEHAQARRALMGFTVRRMAGLRPRIQQIVDQHI  
DEMLSSEQRSADLVEALSPLVPVSLVICELLGVYPYADHDFQAHGTPLVRH  
NTPSQVRVRIQEELNTYLGGLIDRKVADPTDDLRSRQIAKQRAAGTFDRT  
SMVSMAFLLLIAGHETTANMISLGVVGLLQHPDQLAKIKEDPEKTPPAVE  
ELLRYFSITDVTARVATEDVQLGDTTINAGDGVVISGLAADHDPTVFTD  
PNQIDLERGARHHVAFGFQPHQCIGQTLARLELQIVFDTLFRRIPTLRLA  
APLDDIPFKSDAIYGAEEELPVAW

>CYP211B13 (2561679662) *Salinispora pacifica* CNS801

MDASEAVALLMSPFGRLDPYPTYERLRAHGTVVPTAAGFFVVTGYTEADT  
VLRNPRFGVMDDEEREGVFPHWQESPAMMSISQSMIRANPPDHSRMRLA  
AKAFTPRRVAALREVVAQAADGLVDGMIRAGRGGAPVDFLGSFAYPLPVA  
VICALLGVPAADWAQFRRWASDLTGVLEPEITPQELAVADAGARELRDYF  
TELVAQRRRTPADDLTALVQAHDADGDRLSGEELLANLVLLLVAGFETT  
TNLLGNGLVLLNHPDSATALRDQPELAPGYVEELLRYDSPVQLTTRTVR  
ESVPLAGVELPAGSWLLVLLGAANRDPARFTDPARFDPRAQSPPLSFGA  
GAHYCLGAGLARLEAQAFAFPLLRRLPELALAGEPTRRNRLTLRGYETLP  
VTVGAVAADHGTAPGVALGTP

>CYP211C4 (2561680802) *Salinispora pacifica* CNS801

VPDIEGLLTRLYSAPGRQDPYPVYADLHAQAAIAALAPRPERQRVAAVAV  
GYDLVAAVLRDPEWGKQPPPGWTDQEILRTLQSSMMFINPPDHGRMRHVF  
AGTFTPRRLGALAPVINRVTDDELDRMADAGPGEVDFVAEFAYPLPARVM  
AEFIGIPATELTWYRERVDRIDAFLDVAGKTPERLAAANAAGAE LRAFYR  
ELLAHRRRMPGEDLISGLVEAVDAGGVELTEEELISNLIVLFNASFVTTV  
YLLSNGLPVLLAEPKVAALADDPELTAGAVDEILRLQTPVHLLARAAPR  
DTVLGGVSIPQGQNVLLLIAAANRDPAHFPDPDRFDPRRSGPPSLAFGLG  
LHYCLGAAVSRLEGRALPRLLSRFPRLRILEQPVYSGSLFLRGIDRLSV  
SPGGRSIRE

>CYP125A66 (2561680927) *Salinispora pacifica* CNS801

MTEPRIPKGFDFTDPAVLERRVPREEFAELRRTPVWWNAQPKGSAGFDD  
DGYWVVTRYADVMAVSRDSEYSTRENTAIARFQPGTTQADREMQRVIMI



NVDPPEHTKLRAIVSRGFTTPRAINALRGSLAERAERIVRDAAARDTGDFV  
TDVACELPLQAI AELIGVPQHRRKVFDWSNQLIGYDDPAYGVDPMASA  
ELLAYAMEMAHERQRNPSSDDLVTQLVNAQIDGEHLTADEFGFFVMLLAVA  
GNETTRNAITHGMLAFLENPEQWELFKAERPRSAVEEII RWATFPVNVFQR  
TALVDTTLAQQAISAGQRVALFYGSANFDES VFEEPERFDITRSPNPHLG  
FGSGVHFCLGANLARLEIELIFNSIADHMPDIRQLADPQRLRSGWINGI  
RELFPVQYH

>CYP1005A6 (2561681064) *Salinispora pacifica* CNS801

VSAVLFRSWTKTAGTRWPAVTRVADRQGT EHLVVTEHALVRQVLT DQVTY  
RPDNALDAVTPIPV TALRVLAGHRFRLPPTLANNGGVNHPAIRALVADAL  
HPAKVAAQRFPWLT ELVAERVAAIRATLDSGGSADLHAELSADLPLLVLAR  
LVELPDAPVSAVKQFARAALFWAPLDADRQLALADEVGRFHQVLRIFA  
DTGGGLAAALRATGHPPDVLVGALFFLLVAGQETTSQFL TLLHRLAGEP  
TVRAALRDGSVSVTSVVEEGLRLEPPIV TWRRVA AVDSTLGGTAVPAGTS  
VLLWLARAGRDPAIVPAPDEF RPPGQRGSRRLAFGAGAHRC LGDQLARME  
AAVVVEQATPLLDGVTVV RAPWYPDNL TFRMPDAFVIRR

>CYP107AY10 (2561681613) *Salinispora pacifica* CNS801

MYQDQPTRAQLAPI PRSGALLGQEYDQLRKTGDVHQVLLPDT SMAWLVT S  
PELVSRALADPRLALNRKHSRGWSGFALPPALDANLLNLDAPDHTRLRR  
LVGPAFSPQRVAALRPRIQRTAEELADTVLATGSPVDLVTGYCTPLSVQV  
IADLLGVPEAGRTDLRAWTDMLTSYPPDRDAIRRAVVELHGYV VNLIDA  
KQQRPGDDLLSALVATEQEGDRLTRDELTS LAFLILFAGYENTANLIAS T  
VLRLLDHGSLRGVQASEAVEETLRLEPPAPA AAVRRFPTEEMTIGGATIPA  
GDTVLLSIAAATR GADGNSARLAFGNGPHFCLGAALARVEAE EAITVLAR  
RLPSLALAVPGAPVRWRPTFRTHGPAELLVTW

>CYP1278B4 (2561682054) *Salinispora pacifica* CNS801

MPSPVGAVVHPNPYPYAAAMVAERPFFHFDEQLDTWVAASAAAAQAVLTAP  
GCRVRPPHEPVPQGITGT PAGDVFGNLVRMTDGE PQHRLKAIVTQTLGAV  
DRSTVAATAMRHARQVLNDSVRTPYEQLMFELPAQVVATLCGLDPAAGGE  
ATRLVGHFVQCIPATASPEQQQRAARAAAGLQELLGSKLDDTQHGLLGDL  
VRMATHVGWTDQAPLLANGVGFLSQTYDATAALMGNTLLALSQQECELP I  
SEMALQRFVREVIRHDAPIQNTRRFTATPIRHGDVEVPAGQAVLVLLAAA  
NRDPAANPDPHMF RADRTAPNVFTFSAGAHHC PGETLAVTIVTTVVEQLL  
RVGFDPAKLSTQVSYRPSPNARIPVLT D

>CYP166A4 (2563829763) *Salinispora arenicola* CNY685

MTDAISFELPWARTDKFDPPAVFDALREQRPLARMRYPDGHIGWIVSSYE  
LVREVLGDPRFSHSCAVGHFPVTHQGQVIPTHPQIPGMFIHMDPPEHTRY  
RRLLTGEFTVRRSRLTGHVGVAAEQIEVMREHGAPADLVATFARPLVL  
RVLSGLVGLPYGERDRYLHAVTLLHDAEADPAEAAAAAYEQAGAYFAEVIE  
RRRRQPEDDLISTLVGDGELTGEELRNIVTLLLFAGYETTESALAVGMFA  
LLHHEDQLARLRADPTKIDAAIEELLRYLTVNQYHTYRTASEDIELHGEV  
INKGDSVTVSLPAANRDPARFACPADLDIDRETS GHVAFGFGI HQCLGQN  
LARVELRAGLSALLRAFPNRLAVPADEVPLRLQGSVF AVKNLPVCW

>CYP208A12 (2563830041) *Salinispora arenicola* CNY685

MTLDTITPRVPLGPPTAALRMLLV MKRDLGMLTSAAARYGDASRLPVG  
HKALWFFNHPRYAKHVLADNSANYHKGIGLVHARRALGDGLLTSEGLDWR

KQRKVIQPAFQSRRIAQQAGMIAEEAFALVERLRARAGAGPVELTAELTG  
LTLGVLGRSLLDADLAGFDSIGDSFATVQDQAMFELETINAVPMWIPLPR  
QIRFRARRRKLQAVVDTLVDGRAGSLADRVDVLSRLILSARGEADPRVGR  
ERLRDELVTLLLAGHETTASTLGWTLSLIDRHGPGWVERLHAEAVEVLGDR  
LPEYDDLRLRLRYTVMVVEEAMRLFPPVWLLPRRALAPDTIGEYRVPANAD  
VVISPYTLHRHPEFWPNERFDPERFAPGQAADRPRYAYLPFGAGPRFCV  
GNNLGMMEAVFVIALLCRHLRLTGVPGYRLVPEPMLSLRIRGGLPLVVRP  
VS

>CYP211B2 (2563830260) *Salinispora arenicola* CNY685

MDVSEAVAVLTSPSGRLDPYPTYEQLRAGHPVSRRTAGLFVVTGYAEADM  
VLRDPRFVVLDDDLRDDVFPHWQDSPAIKSIARSMRLTNPPDHSRIRRLA  
AGAFTPRRVAAMREVVTAQADELVDDEMIRAGRDGARVDFMDMFAYPLPVA  
VICALLGVPAADRSRFRRWAGDLTGILEPEITPEELAGADAGADELRDYF  
TGLIEQRRRAPADDLTALVQAHDADGDRLSGEELLANLVVLLVAGFETT  
TNLLGNGLVLLTRPEAAAAALRDQPD LAPGYVDELLRYDSPVQLTTRTVR  
ESVSFAGTELPAWSWLLVLLGAANRDPRRFPDPARFDPWRAQSQPLSFGA  
GPHYCLGAGLARLEAQVAFPLLLRRLPELALAGRPSRRTRLTLRGYETLP  
VTVGAVTADRGTAPGVAPGTP

>CYP1051A4 (2563830543) *Salinispora arenicola* CNY685

MATDAAITRARTVPAWKALPAAVRDTHRALVDVGNWSDGDVVRVSLGVSR  
PYLVTNPAHVQEVLEHERAAIYPRGDDTALWRSVRKLVGDGILAEGDAWAA  
SRRVLAPMFRPVRINAMVDTMADAIAGAVDDLHGAAVAGTPIVDGRELSR  
IVCSAIMRVFFADRIAMTVQDALRIMKAQETIVTAMAPRILAPLVPWWIPMP  
GDRRFRTAVRSIDNILLPVLRQAQRQPDGDDLLSRLVRRARADDGQVLSE  
KMRDDLVSMVAVTTETSTVVLTWLVPLLANHPDVADRLYDEIDRVVGGG  
PVRGDHLAELTYTRMVLDLRLYPAGWILPRRAAATDVLGGVRINKGAT  
VILSPYVTQRMATAWWGPTAEAFDPERFVAGQEAADGRHRYAYYPFGVGMH  
RCLGEHLFNLEAILIVATLLSRFRFALTDTSMPGVKVAASRTPARTVEMI  
LKPVAPIPAR

>CYP244A4 (2563830921) *Salinispora arenicola* CNY685

MSTTTNTELTEAPETNMPVDPGLFDCMPDLIAAARVAPVVRIPYLGRHAW  
VVCDELVKQALTHPKMGKDITLVPEWMRQPGMLVTAQPDPEYARAMIMS  
DGENHARIRRIHAPVLSRPNTERWGERVADKVEGFLDELSQAGSGSTEVN  
VVTNYTHKIPLAFISEMLGLPPEAEHRLRGITDIMLYSSDYAARREAIGG  
LFGAVEDWVRNPADLRDGVITGLLAASDGPDAAVTEGEVIVWTLGMIITG  
YETTGSLISTSLYEAIRPPHERPKTDEDITAWIEETLRVHPPFPHPPTWR  
FPLEDIELGGYLIPKGSVPQVSIAAANRKPGEAGDSFEAERRGHGHLISFG  
LGMHYCIGAPLVRLEAQIAVRGFLRRFPQARLSAESAVQWESEWMIRMS  
VLPAVLS

>CYP245A7 (2563830925) *Salinispora arenicola* CNY685

MPSATLPRFALTGWNRENIVNPYPVYQRYREVAPVHRGEPGGDAPDTFYV  
FSYDEVVQVLSSSCFGRGRSLDAAQASVPVPAEQKALRAIVENWLVFMDP  
PRHTELRSLLNRSFSPRIVTELPRPRIARIAQELL SRLGQQADVDLVESFA  
APLPILVISELLGIPEERRAWLRANAMALQEASSRAGRDVDGYARAEVA  
AQEFTEYFREQVRLRRGSAGGDLITILANAQERGA PVSLDAIVGTCVHLL  
TAGHETTTNSLAKAVLALREHPAVLDELRGADGLTTDAVEEFRLYDPPVQ  
AVTRWAHQDTTLGGCDIPRGSRVVALLGSANRDPARFPLPDVLDVRRPAD  
RHLSFGLGIHYCLGATLARAELEIGLQALLDGVP TLYGTQHVDYADDLV  
FHGPSRLVLINLGER

>CYP125A41 (2563831037) *Salinispora arenicola* CNY685

MTEPRIPAGFDFTDPEVLAHRVPREEF AELRR TAPVWWNAQPRGSAGFDD  
DGYWVVTRYADVMTVSRSDTYSTRENTAIARLRPD TTREDIEMQRVIML  
NVDPP EHTKLRAIVSRGFTPRAINALRGSLAERA EHIVRDAAVRGV GDFV  
TDVACELPLQAIAELIGVPQHRRKVF DWSNQLIGYDDPAYGTDPLTASA  
ELLAYAMEMAERQRSPSDDLVT KL VNAQIDGEHLTTDEF GFFVMLLAVA  
GNETTRNAITHGMVAF L DNPEQWELFKAERP KSAVEE IIRWATPVNVFQR  
TALVDTVLGGQAI SAGQRVALFYGSANFDEAVFEDPERFDITRSPNPHLG  
FGGSGAHFCLGANLARLEIELIFNSIADHLPDIRKVAAPQRLRSGWINGI  
RQMPVRYR

>CYP211C1 (2563831184) *Salinispora arenicola* CNY685

VVDVEGLLARLYSAQGRQDPFPVYADLHAQGPIAALPPEPERRRVA AVAV  
GYDLVGAVLRDPEWSKAPPPGWTEQEILRTLQTSMMFINPPDHGRMRHVF  
AGTFTPRRLGALEPVVNRVADEL LDRMADAGAGGLDFVAEFAYPLPARVM  
AEFIGIPETELDWYRERVDVIDAFLDVAGKTPQRLAAANAAGAE LRAFYG  
ELLAHRRRTPEGDLISGLVEAVDAGGVALTEDELISNLIVLFNASFVTTV  
YMLSNGLPVLLAHPEVAAA LATDPVLTAGAVDEILRLQAPVHLLARAAPR  
DTV LGGVPI PQGQNV LLLIAAANRDP AHFPDPDRFDPRRSGPPSLAFGLG  
LHYCLGA AVSRLEGR LALPRLLSRFPRLRIMEQPVYSGSLFLRGIDKLSV  
SPGEGSTRE

>CYP154M5 (2563831558) *Salinispora arenicola* CNY685

VEQSCPYKLDVTGRDIHAEGEAI RARGPVAQVELPGGVQGSV TGYQAAR  
QVLADPRFAKDPQKWPAYTSGAIPPTWPLIGWLLMDNM TTNDGADHQRLR  
KLVSHGFTPRQVERTRPLIVKIVNDLLDGLSTAGPDEVVDLKGRFATPLP  
ARVICDMFGVPEALRASVLRGAQVNV TSSISGEEAEANVEQWHRELLELV  
EAKREKPD EMDASLLIAAKEEDGSTLSQEEVVGTLHLM LGAGSETLMNAL  
SYAVLGMLSNPGQYEMVRNGTSSWDDVIEETLRAQAPVAQLPLRYATEDV  
AVGGAVIKAGDPVLMGFTAIGRDP AVHGETAGDYDITRADKTHLSFGHGV  
HFCLGAPLARLELKIALPALFERFPNMTLAVRPDQLEPQGT FIMNGHREL  
PVRLGQPATVLA

>CYP105CT2 (2563831574) *Salinispora arenicola* CNY685

MNSPNHMPADSSSTAPARGCPMALS RGRVGLDVTDEISELRDGGRLGRIT  
TAFGQEATLITRYDEVRAQMADSAVFN VAGVSPPPVLVDGGFDTESVRRR  
RTVGNLIMLDPPEHTRLRRMVAAWFTARRVERLRPRVVEIINAALDEMER  
NGPPVDLVAMFAKTVPITVICELIGVPEELRERYRRRAERAASASAVSTP  
LDELRLRLREAGWVSRELIEYHRENPSDDIIGMLLREHGADSHDDGITDDE  
LVGLANALLIAGHETTTQMLSMGT LALLRHPDQLALLRDDPSIVAGAVEE  
LLRYVGVLHGGFVRVATRDTRLGGHRIHAGELVVPALTAANRDPRL LTDG  
DRLDITRPPTSHVAFGHGVHFCIGAPLARMELREAF PALLRRFPGLRLAV  
PDSELEFTQGT TVYSLRGLPVTW

>CYP107FS2 (2563832156) *Salinispora arenicola* CNY685

MPVPQGEQNLTTTEVFADPKALFATLGS RQPLHRISLPDGMPAVLVTGYRE  
ARQALSDPRLVRSITAAAPELHKYHPLASDDYALSRHMLFADPPDHGRMR  
KLVSTAFTRRRVEQMRPRIQQITDDLIDVVA AKGEADLVEALALPLPIAV  
ISEMLGVFPFADRSEFERHA EVLTGINASSGFDAIIAAGRWFDEYLAGLVQ  
QRRREPQDDLISGMLAAQDKGDR L TDVELRSNALLLLSAGFETT VNLVAN  
GLLALLRHPEAMAALRSEPNLMTSAVDELLRYDSPVSCVTYHFAQEPVEI  
GGFEIRSGEHVVIAAAAANHDPTVFADPSRLDLRREGSGQILSF SHGIHF

CLGAPLARLEGEIAFGTVLRRLAGLRLAVPTDSLIVWKASFVLHRLERLPV  
TFTPDRDPNPIDSVHTV

>CYP105CN1 (2563832157) *Salinispora arenicola* CNY685

MAAPAPQATQSTTPHPPSYPLPRECPYRPSAGTARLRDAGPVSTVRLYDG  
RTAWLVTGAAEARALLADSRVSNRADFPNYPVMDERHLSMRATREMAREE  
EGGFAAALFGMDPPEHTRQRLQLLPRFTVRQVAARRPAIQRIVDEHLDAM  
EANGSPADLVSAFATPVPTMVVCTHLGVPHYQDRTRFEPAVAGLFEPDRAD  
AAMAELTAYLRQLIETKQSEPGDGVIDHLIANHLRPGAIDRAELVAIASA  
ILVAGTVTTSSAIALGTLALLTAPGQYAALVDNPDLPVGAVNEILRYLSL  
VEQLARVATEDIEIGGKLIRAGDGIIVSFAAGNLDPNVTTHPDRLDVALP  
PTNHLAFSHGIHHCIGQNLALLELDIAFRALVSRFPTLRLAVPAEQLPY  
FAGDVPRLACLPTW

>CYP105CP2 (2563832159) *Salinispora arenicola* CNY685

MTKSMPVQDLPAFPIPRECPYRPSAQHVSLRSGGPMARVRLYNGRTAWLV  
TDSAHAARAVLSYRRVSIKPYHGNYPILLNEEFKVVDSGYADVLFVGDPP  
EHTRQRMIMPSFTLRRTAVLRPDIQRIVDDKLDDEMTRHGAPGDLVTEFA  
QPVPMSMVSFLLGVFWEDHEEFETPAHKLFPVELAEETELGAYLERLI  
QKKEQPGGTGGTGLLDDLRDHLRAGALSDELVHIAMAMLVAGTDTTT  
NVISLGLTALLDNDPQWEALRDNDELIPGAVEEILRYTSLIEAFARVAV  
SDIELNGAVIKEGEGILISSAGVNFDPALAPDPGRFDIRRPFRPSFSFSH  
GIHRCPGDNLARLELEIAFRSLVTRMPNLRATAKPIDQIPSNNDGTLQRL  
YELPVVW

>CYP105CH2 (2563832507) *Salinispora arenicola* CNY685

VSSLPLPTYPKLRDPADPFLPPADYLAIQSEKPIAKVLLPSGRPTWLITG  
HALARQVLTEPCVSVDRKHNPFPYPVNPDAVVAQVARWTYILLGDDPPL  
HTERRRLLISEFSVRQAQAMRPRIQQLVDFHLDQLIAAGPGADFSKHFAM  
KVPSAVICEMLGVPFADHDYFQERTALQLRRDVAVADQKQAIDELLAYFE  
QLIQKSSHPGDDLRLIVSNRETEAFDHEALVALGLLLLLVGGHETTAN  
TLTLATATMLERPEVAEQLRTDPSLMPSAVEEFLRYFSVAVAVSRIATAD  
LQVGDLVRAGESMLLVNLTARDGTVPFEPHRLDIHRNARNHLAFSHGI  
HOCMGQNLARVEMQIALDTVLRLPGLHLVTPFEELPFKYRHLVWGIEEL  
KVAW

>CYP107Q4 (2563832868) *Salinispora arenicola* CNY685

MTTTAETSATIDLFSPEVVADPFGWYARLREETGPTTGTLNIGTMMGGP  
EMWLVTTRYEDVRQVLTDPRFLTNPADSPLEDIRAGVFKRLDFPPDLIPW  
MANLLNVSDGEDHTRLRLKLVSYALTAHRIGKLRPRVEKITADLLDKLAED  
GKDGSPVDLVEEYCYPLPVTVICELVGIDEPDRAHWRAWGDSMATMNGER  
IPTTLVKCIELARELIEKRAEPQDDLVTALVQAQAEQONRVSDDEIIGI  
LFSLVTAGHQTTTYLIGNSVILLLENPDQLARLKENPSMWPQAVRELQRL  
GPIQFAQPRFPSEDIELGGVTIPRGAPVAPLLLAANTDPRRFPDPNKLI  
DRLAVGSESHLGFKGKGIHRCCLGQHLAYQEAVALQGLFTRFPDLSLAVPR  
EEIPWILRPGFTRTRTLPLKLV

>CYP105G7 (2563832869) *Salinispora arenicola* CNY685

LTIETTETTPADDTLRAPLPRQFMQRDDPSKLPPALAALAEQAPVGRSTL  
PDGDPFWMVSGYDEARAVLSDFRFSDFRYHPRFKKLSGQLGERLRNDK

ARAGSFINMDPPEHTRYRKLLTGQFTVRRMRQLTVRIEQIVTEQLDVMLA  
KGNSADLVSAFAVPVPSLMICELLGVRYEDRTEFQRRAGLLQTDLPKQ  
AVENLEAQRAFMQRLVTDKRRNPADDMISGLVHHAGADPPLTDDDELVGIA  
TLLLFAGLDTTASMLGLGMFMLLQRPEQMAVLRDDPPRIGDAVEELLRYL  
TVVSAGLFRFAKEDVVLGDEHIPAGSTVVVSLMAANRDGRHWPEPETLDV  
TRVRSSHLAFGHGVHQCLGQQQLARIELTVGITELLRRLPNVRLAVPPADV  
PLRNDMITYGVHRLPIRWDTF

>CYP105BL2 (2563832960) *Salinispora arenicola* CNY685

MSSHAAAPDPETATPLHTLAPELTFPQFERSTFPDPPQAYTELSGRCPV  
APVMSDVGKPSWLITSFEGVRTTLLSDPRFSSDMSHPGFNRTGKPVDDL  
KDTLGAMDGERHRYRRLMTGELTVRRAKAMRPVITQITDEALDQLAAAG  
PGADLVKHVALVVPSPRVAYHLVGIPSSDYELFTGMATTLMESTSSADQFA  
ALQNMVSYFDTLVTDREHHRDDLLGRMVRRYLATGELTRDMLITLVWTT  
LAAGQETTAHMIIGLVAALLRHPDQLELLRREPHLLPGAVDELMRYLPMI  
QFGIPRVAMDDVKVDGQTVTAGEGVVALPPLANRDPVFERPDELDVRRN  
ARQHLTFGYGPHQCPAHALARLELEVYGRLLERFPTLRLADSDADLKVR  
DEDIMYRVSELAVTW

>CYP107EU2 (2563833241) *Salinispora arenicola* CNY685

VTVGQTLPLDVYSPEFTRDPYAVFARLREQAPVCRVTTHRGMSAWMVTRY  
ADVRALLADSRLAKDGNRIGELMPRHSKLTGAATGFPPGLTTNMVNSDPP  
DHTRLRHLVGREFTGHRVESLRPRIEEIVDDLLDGVAACGDEADLAEILS  
RRLPIAVIGELLGVPEADRAGFFRWADTLYGGTASPEALGQAYNAIVDYL  
GRLCDAKRDVPADDLLTALVQVSADEDRLSREELVSMALLLLVAGHETTS  
KQISNGVLALLLNPEQLKLLKAQPALAAGAVEELLRFEGPSLSASLRFTT  
EPVEVAGVVIPEGEFVLLSLASGNRDPQKFPDPDRLDITRSTQGNLAMGH  
GIHHCVGAALARLELEIVLSRLVARFPQLQLAVAADDLEWLVSFFRAPL  
HLPVSLGR

>CYP1005A1 (2563833337) *Salinispora arenicola* CNY685

VSAVLFRSWTKTAGTRWPDVTRVADQSGTEHLVVTRHALVRQVLTDAQTY  
RPDNALAEAVTPVPVAALRVLAGHRFRLPPTLANNGGVSHPAIRALVADAL  
HPTKVAAQRPWLTTELVA DRVATIRTTLDSSGGPVDLYADLTADLPLLVLAR  
LVELPDAPVNAVVKQFARAALFLWAPLDADRQLALADEVGRFHQVLRIFA  
DTGGGLAAALRATGHPPDVLVGALFFLLVAGQETTSQFLTLLHRLTDEP  
TIRAALRAGSTSVADVVEEGLRLEPPIVTVRRVAAVDSTLGGTTVAAGTS  
VLLWLARAGRDPVVAAPDEFPRPGQRGSRRHLAFGAGAHRCCLGDQLARME  
AAVVVEQATPLLDGVTVVRPPWYPDNLTFRMPDAFVVRR

>CYP107AY14 (2563833425) *Salinispora arenicola* CNY685

MKAELTPIPRSGARLGQEYDQLRKTDGVHQVLLPDASLAWLITNPEVAAR  
ALADPRLALNRRNSRGWSGFALPPALDANLLNLDAPDHTRLRRLVGPAF  
SPQRVAGLRPGIRRAAEHLLDTLVATSRPTDLVTGYCNPLSVQVIADLMG  
VPDAGRNTLRAWTDMLTSYPPDRDAIRQAVTELHGYYVDLIDLKQQQPG  
DDLSSVLVTIEQDGDRLTRDELTSLAFLILFAGYENTANLIASAVLWLLD  
HGGLNEVPPIAEAEIEGTLRDEPPAPVAIRRFPTEDIIIRGLTIPAGDTVLL  
SIAATRGAAGNARLAFGNGPHYCLGAALARVEAEAEALTVLARRLPGLTL  
AVPPAQVRWRPFTFTHGPAELLVGW

>CYP105W3 (2563833538) *Salinispora arenicola* CNY685

MTGYQDPPTGDQPGAPVPSGSTDPGLDAFFPLPRRCFFSPPAEYARLRAEH  
PVVRLPMLGGDTAWVVSRRHADVRQVLGDPRMSADRRRPGFPKFAPTTEGQ

RQASFANFRPPLNWMDPPEHAICRRQIVDEFSARRVRQLRTLVERVVDAL  
LDALAAAAPGADLVSTFAYPVPSQVICEVLGVVPYGEHGFFERRSTLMFRR  
STPADERARCAREIREFLDVVVTDKERRPGDDVLSRLLYRQRSAGGVDHE  
AVVSMAFVLLVAGHVTTSNMLALSVLALLTHPARLARLRAEPKRFPAAVE  
ELLRYFTVVEAATARTATAEVTIGGVTTIAAGEGVVALGQAANRDPRVFEH  
PDEFDPDRDARAHAFGHGRHICPGQHLARLEMEVALSRLFRRLPGLRLT  
MKVSDLPLKEDSNIFGLYALPVAW

>CYP248A2 (2563833546) *Salinispora arenicola* CNY685

VLADAVTAFDPTAVDVRRDPYPSYHWLLRHDPVHRGAHQVWYVSRAFADV  
AVLGDERFARTGIRRFWTDLVGPGLLSQIVGDIILFQDEPDHGRLRGVVG  
PAFSPSALRRLEPTIEATVNDLLRPARALGAMDVVADLAYPLALRAVLGL  
LGLPAGDADAVGRWSRAVGRTLDRGATAEDMRRGHAAIAEFADYVERALA  
ERREDGADLLALMLAAHRSQLMRNEIVSTVVTFIFTGHETVASQLGNGL  
LSLLDHPEQSELVRRQPHLVSQAVEECLRFDPVQSNTRQLAADVELHGR  
RLRRDDVVVVLAGAANRDPGRYDRPDEFDIRRDPVPSMSFGAGMRYCLGS  
YLARLQLRTALGAMVALPDLRLVCSPNELAYQPRTMFRGLTRLPAFTPA  
G

>CYP105AB35 (2563833710) *Salinispora arenicola* CNY685

MTETASSRLTDTEFPVQRQCPFAEPVEYEQIREQSSIAMVRLTGGGEAWW  
ISGHEQGRAVLADRRFSSDRKANFPFISTDPATRKRLYAQPLSMISMDG  
AEHAQARRALIGEFTVRRLAALRPRIQQIVDQCIDEMLTDDQHCVDLVKA  
LSLPVPSLVCELLGVPPYDDHDFEQEHTATLVRRNTAPEVRQHSIDELNA  
YLGALIDRKLANPDDDLLGRQIARQHQQDGTFRSSIVSLAFLLLVAGHET  
TANMISLGVVGLLQHPDQLTMIKNDPDKMPLAIEELLRFFTIVDSVTSRV  
ATEDVRFGDTTINAGDGVVVSGLSADWDPTVFADPDRLDLERGARHHIAF  
GFGPHQCIGQNLARLELQIVFDTLFRRIPTLRLAASLDKIPFKTDAAIYG  
ARELPVAW

>CYP107AX1 (2563834207) *Salinispora arenicola* CNY685

MTSRPTAVFDQCLLRDPHSRYNALRDQAPVHHVLTDPGAPAWLVTRYNDV  
RAAFTDPRLSVDKRFSGTDGEHGSSLPPELDAHLLNRDPPDHTRLRLRLAA  
AAFTPRRVADLHPAVERIVSTLLDGLAGHDRAELIGSLASPLPLQVMHKL  
LGLPTQANIDFRTWTNTLLSADANQPAQSRAAMANMRRFLIEQLAHKRAQ  
PGDDLLTGLLAAREDDRLTDELVAMVFLLMFAGYDNTAALIGTVTHSL  
LTNAELHEAVRGGSLALDELIDEVLRWNPAFPLAVRRFAREPITIAGQTI  
PAGDRIWLCLASANRDPAQFTQPDDELGIVGLRRPHLSFGHGIHYCLGAPL  
ARLQTTIAVTSLNRFPEMRLAVPAHDIRWRESFRLRGLIALPVYL

>CYP163B23 (2563834754) *Salinispora arenicola* CNY685

MTEAWYDLSELDSLDPDTYSRYDQHQIWRQLRSEGGIHRQPGTADKPSFW  
VVTKYNDVKAVLGDTERFTSERGNVFATLLAGGDTASGQMLAVTDGQRHK  
DIRTILTKAFSPRALNYAERVGRNASRLVSEAVGKESCDFATEVAERIP  
ISTICDLLGVPSGDHDILLGLTKSTLGSDRPGYDELEARLARNEILLYFG  
DLVERRRKDPQEDVISVLATAVVDGARLPEDTVVLNCYSLLLGGDETSRL  
SMIGAVQAFIDSPTEWRRLKNEEVTLTATEEILRWTSAMHFGRRRAVVK  
SVIREHVIEAGDIVTVWLSSANRDEEVFDRADEMDLARSFNKHITFGHGR  
HFCIGSYLGRAEVSAMIEALRSQVNNIERVGEPRPLHSNFFSGLRSLPVK  
LAAS

>CYP1198B2 (2563834806) *Salinispora arenicola* CNY685

MSGELTDQRAAPDVGGNPLRSLLDHGIRANPYPLFGELREAGPTAVEDGS  
VVLFGHEYEHCSQILRHRDMGSDTSEAPSIKGFVVDDAERAGSSIFFMDQP  
GHGRQRKLVSKSFTPRIVQSFGPQITRIVDGLFEDFQDKGELDVVTDLAY  
PVSIGIICDLFGIPDDERDMLKEWSDDLALSTELPTLGAAIGVLNVFTRD  
EINRFGSVAMAAHAYFADLIHRRRNKPNPGDDLVSLLATESNGERLTRFEV  
TSVLATLFVAAHESTTNLISGGILALLRNQDQMTVLRENPGVITNVVDES  
LRYDPPVHLAARMARARTTIGGYDLDPGSIVVVLMAAGNRDPRAYENPDV  
FDVNRKIKNVSLAFGAGAHFCIGSGLAKLEAEIAISAFARLKNPEVDES  
SLEYRRHIVVRGLEHMKVSFQP

>CYP105BL6 (2516634423) *Salinispora pacifica* DSM 45547

MSSHPAAAPGPETATPLHTLAPELTFPQFERATPFDPEAYTELSGRCPV  
APVRMADGKPSWLITSFEGVRAALSDPRLSSDMSHPGFNRTGKPVDDL  
KDTLGAMDGERHRYRRLTGELTVRRAKAMRPVITQITDEALDQLAAAG  
PGADLVKHVALVVPSPRVACHLVGIPLSEYELFTGMAAKLMEATSSADQIA  
ALQDMVSYFDKLVTDREHHDRDDLGHMVRRYLSTGELTREMLIRLAWTT  
MAAGQETTAHMIIGLVAALLRHPDQLELLRREPHLMPGAVDELMRYLPMI  
QFGIPRVAMDDVEVDGQTVTAGEGVVALPPLANRDPVFERPDEL DVRRN  
ARQHLSFGYGPQHCPAHALARLELEVVSRLLEFPFTLRLADGDADLKVQ  
DEDIMYNVSELAVAW

>CYP107AY7 (2516636062) *Salinispora pacifica* DSM 45547

MRAEPAPIPRSGARLGQEYDQLRKTDGVHQVLLPDTSLAWLVTSPELVSR  
ALADPRLALNRKHSRGGWSGFALPPALDANLLNLDAPDHTRLRRLVGPAP  
SPQ RVAALRPRIERTAEELVDTVATGSPVDLVTGYCTPLSVQVIADLLG  
VPEARRTDLRAWTDTMLTSYPPDRDAIRQAVVELHGYYVNLIEAKRQRP  
DDL SALVATEQEGDRLTRDELTSLAFLILFAGYENTANLIAS TVLRLLG  
HGSLRGARASEAIEETLRLEPPAPAAIRRFPIEEMTIGGATIPAGDTVLL  
SIAAATRGTDGNSARLAFNGPHFCLGAALARVEAEEAITVLARRLP SLA  
LAAPGAPVRWRPTFRTHGPAELLVTW

>CYP105AB34 (2516637484) *Salinispora pacifica* DSM 45547

MTETASITTPGTSSTATSGPGSGEVTDTTEFPVERGCPFSTPAEYEQIREH  
SPLTKVRLTTGREAWWIAGHELARAVLADRRFSSDRRRDNFPFVSTD PET  
RKQLQDQPTSM LGMDGAEHAQTRRALMGFTVRRMAGLRPRIQQIVDQHI  
DEMLSSEQRSADLVEALS LPVPSLVICELLGVYPYADHDFQARS GPLVRH  
HTPSKVRVRIQEELNTYLGG LIDRKVADPTDDL SRQIAKQHAAGTFDRT  
SLVSMAFLLLIAGHETTANMISLG VVGLLQHPDQLAMIKDDPEKTPPAVE  
ELLRYFTTITDVTARVATEDVQLGDTTITAGDGVVISGLAADHDPTVFTD  
PNQIDLERGARHHVAFGFGPHQCIGQTLARLELQIVFDTLFRRIPTLRLA  
APLDDIPFKSDAI IYGAEELPVAW

>CYP1005A8 (2516637726) *Salinispora pacifica* DSM 45547

MSAVLFRSWTKTAGPHWPAVTRVADQQGTEHLVVTEHELVRQVLT DQVTY  
RPDNALDAVTPIPV PALRVLAGHGFRLPPTLANNGGVSHPAIRALVADAL  
HPAKVAAQRPWLT KLVAERVAAIGATLDSGGSADLHAELNADLPLLVLAR  
LVELPDAPVSAVKQFARA ALELFWAPLDADRQLALADEVGRFHQVLR EFA  
DTGGGLAAALRTTGHPDVLVGALFFLLVAGQETTSQFLTLLHRLAGEP  
TVRAALRDGGVSVANVVEEGLRLEPPIV TWRRVAAVDSTLGGTAVPAGTS  
VLLWLARAGRDPAIVPAPDEF RFGQSGSRRLAFGAGAHRC LGDQLARME  
AAVVVEQAAPLLDGISVVRAPWYPDNLTFRMPDAFVIRR

>CYP211B14 (2516638071) *Salinispora pacifica* DSM 45547

MDASEAVALLMSPPGRLLDPYPTYERLRAHGFPVVPPTAAGFFVVTGYTEADA  
VLRNPRFGVMDDEERDGVFPHWQDSPAMMSISQSMIRANPPDHSRMRRLA  
AGVFTPRRVAALREVVAQADELIDEMIRAGRGGAPVDFLGSFAYPLPVT  
VICALLGVPAADWAQFRRWASDLTGVLEPEITPQELAIADAGATELRDYF  
TELIAQRRRDPTDDLTTALVQTHDADGDRLSGEELLANLVLLLAVAGFETT  
TNLLGNGLFVLLTHPESATALRDQPELAPGYVDELLRYDSPVQLTTRTVR  
ESVPLAGVELPAGSWLLVLLGAANRDPARFTDPARFDPGRAQSPPLSFGA  
GAHYCLGAGLARLEAQVAFPLLLRRLPELALAGEPIRRNRLTLRGYETLP  
VTVGAVAVDHGTPAGAALSTP

> CYP244A5 (2516638466) *Salinispora pacifica* DSM 45547

MSATTNAELGEAPETSMPVDPGLFDCMPDLIAAARIAPVVRIPYLGRHAW  
VVCDELVKQALTHPKMGKDITLVPPEWMRQPGMLMVTQPPPEYARAMIMS  
DGENHARIRRIHAPVLSRPNTERWGEQVATKVEGFLELSKAAAGSNAEV  
DVVTNYTHKIPLAFISEMLGLPPAAEHRLRSITDIMLYSSDYAARREAIG  
GLFGAVEEWVRNPDGLRDGVITGLLAGSDGPGAAVTEGEVIVWTLGMIIT  
GYETTGSLLISTSLYEALRRPPHERPRTDEDITAWIEETLRVHPPFPHPHTW  
RFPLEDIELGGYLIPKGAPVQVSIAAANRQPGEGADSFDTERRGHGHLSE  
GLGMHYCIGAPLVRLEAKIAVRGFLRRFPQARLSADAAVQWESEWMIRRM  
SFLPAVLS

>CYP245A11 (2516638470) *Salinispora pacifica* DSM 45547

MSSTTLPRFTLTGWNREDIVNPYPVYRRYREVAAVHRGEAGGDAPETFYV  
FSYDQVAQVLSSSCFGRGRSLDATAASVPVPADQKALRAVVENWLVMFMDP  
PRHTELRSLLNRSFSPRIVTGLRPRIARIAQELLSRLGRQVETDLVEGFA  
APLPILVIAELLGIPAERHGWLRTNALALQEASSSRARRDTAGYARAEAA  
AQEFTEYFREQVRLRRGSAGDDLLTILANAQLRGAPVSLDAVVGTGVHLL  
TAGHETTTNSLAKAVLALQHPAVLEELRGADGLTADSIEEFLRYDPPVQ  
AVTRWTHQDITLGGWEVPRGSRVALLGSANRDPARFPLPDALDVHRPAD  
RQLGFGLGIHYCLGATLARAELEIGLQTLNGLPTLGYPAYVDYADDMV  
FHGPSRLILVNPGERFCQ

>CYP107AW6 (2516638559) *Salinispora pacifica* DSM 45547

METVTGTSAFFFFPYIADPYPTLARIRANGPVSIHLSDEGVPMWVIARYR  
EVRAALADPRFGQDARRAQALADNRVAGVTLGGDIVHMLNSDPPDHTRLR  
RHVQGAFTARRVAAMRPLVERITTSLLDGLAGRKTVDLVQDLAFPLPMLV  
ICELLGFPAEERNAYRSWSTAILTHDDDPAVFATALREMTDYIAVQLRIR  
RSRPGDDLLTELLAARDAGQLTDDEIVGMVFLLLIGGHETTNNLLGTATL  
ALLRNPDQHRWLLANRHALPEAIDEFLRYESPVAMATLRFTTTTPVTVDDV  
VIPAGELVLVSLGGANRDPDRFPDADRLILDRRDTGHLLAFGHGLHRCLGA  
FLGKLEGEVALGALLRRHPKLALATEVRQLQWRDTIMLRGLESPLVSLHG

>CYP107AX9 (2516638575) *Salinispora pacifica* DSM 45547

MTAQAPPVFDQRLLRDPHRRYNALRDQAPVHRVRTPDGAPAWLVTRYDDV  
RAAFTDPRLSVDKRFSGTDGEHGSSLPPELDAHLLNRDPPDHTRLRLRLAA  
AAFTPRRVADLRPAVEKTVSTLLDGLAGNDHAELIGSLASPLPLQVMHEL  
LGLPTQTSVDFTWTNTLLSADANQPAQSRSAMNMRRFLIEQVAHKRAQ  
PGDDLLTGLLCVREDDDGLTDELVAMLFLLMFAGYDNTAALIGNAIHAL  
LTNVELAEAVRTGSLAVDELVDGVLRWNPSPFLAVRRFAREPITIAGQTI  
PAGDRIWLCLASANRDPAHFTEPDEIGIADMRRPHLSFGHGIHYCLGAPL



ARLQTTVAVASLFD RFP GIRLAVPVQDIQWRESFRLRGLVALPVSL

>CYP208A21 (2516638588) *Salinispora pacifica* DSM 45547

MTTTSIDRRRPFPFPRAAALSMLLTMSRDRLGMMTAAARAYGDAAWLPVG  
HKALYFFNHPDYAKHVLT DNSDNYTKGIGLVHARRALGDGLLTSEGELWR  
EQRRVIRPSFRSGRAPDQASVIAEEVASLVERLRARAGGPPVNVVTEFTG  
LTLGLVLRRTLLDVDLTALATVGDFAAAVQDQAMFELVTL SAVPTWIPLTR  
QRRFRRAEALERIVDDLVARRGDVSGRDDVLSRLILSTGAEPDARVRRQ  
RLRDELVTLLLAGHETTASTLGWTLYLIDRHPPVRERLRAEAAEVLGDRL  
PAYRDL PDLRFTTMVVQEAMRLYPPVWLLPRRSRRADRVGPYWPAGSDV  
VVSPYTMHRHPGFWEPEPDRFDPLRFDPRNAADRPRYAYLPFGAGPRVCVG  
SNLGMTEAVIAVAMLCRELRLVRVPTHAAVPEPMLSLRIRGGLPMSVHLA  
D

>CYP154M16 (2516638605) *Salinispora pacifica* DSM 45547

MPDRCPVLDP SG RDIHAEADRLRAQAPAVKVELPGGVHAW SITSYDV VRR  
LLLDNRNVTKNARNHWPKFINDEIPPDWEMISWVAMDNMVTAYGKHLVRLR  
RLIAKAFTAQRVETVRPQVEKLVDEL LDGLAAETGEVVDLREKFCYPLPA  
LLIADLIGMTEQQRAQTAKAMDLMVDTTVSPEQAQAILTGWRTAMDELIA  
AKRREPGKD IASDLIAARDDENGGQLT DSELTD TIFAILGAGSETTINFL  
DNAVTALVTHPGQLELVRSGRAGWDDVIDEVL RVQCPLASLPLRYAVTDI  
ELDGV TI PQGDPILIN YAAAAGRDPALHGDTAGEFDVTRENKEHVSFGHGP  
HYCLGAGIARLVATIGLSRLFERFPDLRLAVPAEELQPLPTFIMNGHRAL  
PVRLVPAPAAATAV

>CYP211C6 (2516638846) *Salinispora pacifica* DSM 45547

MPDIEGLLARLYSAQGRQDPYPVYADLHAKAAIAALEPRPERQ RVA AVAV  
GYDLVA AVL RDPEWFKQPPPGWRDQEILRILQSSMMFINPPDHGRMRHVF  
AGTFTPRRLGALEPVINRV TDELLDRMADAGPGEVDFVAEFAYPLPARVM  
AEFIGIPATELAWYRERVDRVDAFLDVAGKTPERLAAANAAGAE LRFFYR  
ELLAHRRRTPEGDLISGLVEAVDAGGVELTEDELISNLIVLFNASFVTTV  
YLLSNGLPVLLAHPEVAAAALTSSPELAAGAVDEILRLQTPVHLLARAAPR  
DTV LGGVSI PQGQNVLLLIAAANRDP AHFPDPDRFDPRRSGPPSLAFGLG  
LHYCLGAAVSRL EGR LALPRLLSRFPRLRILEQPVYSGSLFLRGIDKLSV  
SPGGREHP

>CYP125A66 (2516638982) *Salinispora pacifica* DSM 45547

MTEPRIPVGFDFTDPAVLERRVPREEFAELRR TAPVWWNAQPKGSAGFDD  
DGYWVVTRYADVMAVSRDSETYSTRENTAIARFQPGTTQADREMQRVIMI  
NVDPP EHTKLRAIVSRGFTPRAINALRGSLGERAERIVRDAAGRGAGDFV  
TDVACELPLQAI AELIGVPQHRRKVFDWSNQLIGYDDPAYGVDPLAASA  
ELLAYAMEMAHERQRNPSDDLVTKL VNAQIDGEHLTAD EFGFFVMLLAVA  
GNETTRNAITHGMLAFLENPEQWELFKAERPRSAVEEII RWATPVNVFQR  
TALVDTTLAGQAI SAGQRVALFYGSANFDES VFEEPERFDITRSPNPHLG  
FGGSGVHFCLGANLARLEIELIFNSIADHMPDIRKVADPQRLRSGWINGI  
REL PVQYH

>CYP1278A4 (2516639204) *Salinispora pacifica* DSM 45547

MPSPVGAVVHPNPYPYYAAMVAERPFFHFDEQLDTWVAASAAAAQAVLAAP

GCRVRPPHEPVPQGITGTPAGDVFGNLVRMTDGE PQHRLKAIVTQTLGAI  
DRSAVAATAMQRRARQVLNDSVRTPYEQLMFELPAQVVATLCGLDPAAGGE  
ATRLVGHFVQCIPATASPEQQQRAAQAAGLQELLGPKLDDTQHGLLGEL  
VRMATHVGWTDRAPLLANGIGFLSQTYDATAALMGNTLLALSQQECELPT  
SEMALQRFVREVIRHDAPIQNTRRFTATPIRHGDVEVPAGQAVLVLLAAA  
NRDPAANPDPHMFADRTTPNVFTFSAGAHHCGETLAVTIVTTVVEQLL  
RVGFDPAKLSTRVTYRPSPNARIPVLTE

>CYP105BL2 (2562134718) *Salinispora arenicola* CNY230

MSSHSAAPDPETATPLHTLAPELTFPQFERSTPFDPPQAYTELSGRCPV  
APVSMADGKPSWLI TSFEGVRTT LSDPRFSSDMSHPGFNRTGKPVDDL  
KDTLGAMDGERHRYRRLMTGELTVRRAKAMRPVITQITDEALDQLAAAG  
PGADLVKHVAFVVP SRVACHLVGIP LSYELFTGMAATLMDSTSSDDQFA  
ALQNMVSYFDTLVTDREHHRDDLLGHMVRRYLATGELTRDMLIRLAWTT  
MAAGQETTAHMI GLGVAALLRHPDQLELLRREPHLLPGAVDELMRYLPLI  
QFGIPRLAMDDVEVDGQTVTAGEGVVALPPLANRDPAVFERPDELDVRRN  
ARQHLTFGYGPHQCPAHALARLELEVYGRLLERFPTLRLADSDADLKVQ  
DKDIMYRVSELAVTW

>CYP105CH1 (2562134793) *Salinispora arenicola* CNY230

VSSLPLPTYPKLRDPADPLLPAPAEYLAIQSEKPIAKVLLPSGRPTWLITG  
HALARQVLTEPCVSVDRRHFNFPYPVPNPDAVVAQVARWTYILLGDDPPL  
HTERRRL LISEFTVRQAQAMRPRIQQLVDFHLEQLIAAGPGADFSKHFAM  
KVPSAVICEMHGVFPADHDYFQERTALQLRRDVPVAAQQAIDELLAYFE  
QLIQEKSSHPGDDVLSRLIVSNRETEAFDHEALVALGLLLL LVGGHETTAN  
TLTLATATMLERPEIAEQLRTPSLMPSAVEEFLRYFSVAVAVSRIATAD  
LQVGGQLVRAGESMLLVNTIARDGTVFPEPHRLDIRRNARNHLAFSHGI  
HQCMGQNLARVEMQIALD TVLRRLPGLHLVAPFEELPFKYRHLVWGIEEL  
RVAW

>CYP125A41 (2562134950) *Salinispora arenicola* CNY230

MTEPRIPAGFDFTDPEVLAHRVPREEFAELRRTAPVWWNAQPRGSAGFDD  
DGYWVVTRYADVMTVSRSDTYSTRENTAIARLRPDTTREDIEMQRVIML  
NVDPP EHTKLRAIVSRGFTPRAINALRGSLAERA EHIVRDAAVRGVGFV  
TDVACELPLQAI AELIGVPQHHRKVFWDWSNQLIGYDDPAYGTDPLTASA  
ELLAYAMEMAEERQRSPSDDLVTKL VNAQIDGEHLTDEFGFFVMLLAVA  
GNETTRNAITHGMVAFLDNPEQWELFKAERP KSAVEEII RWATPVNVFQR  
TALVDTVLGGQAI SAGQRV ALFYGSANFDEAVFEDPERFDITRSPNPHLG  
FGGSAHFCLGANLARLEIELIFNSIADHLPDIRKVAAPQRLRSGWINGI  
RQMPVRYR

>CYP211C1 (2562135099) *Salinispora arenicola* CNY230

VVDVEELLTRLYSAQGRQDPFFVYADLHAQGPIAALPPEPERRRVA AVAV  
GYDLVGAVLRDPEWSKAPPPGWTEQEILRTLQTSMMFINPPDHGRMRHVF  
AGTFTPRRLGALEPVVNRVADELDRMADAGAGGLDFVAEFAYPLPARVM  
AEFIGIPETELDWYRERVDVIDAFLDVAGKTPQRLAAANAAGAE LRAFYG  
ELLARRRRTPGEDLISGLVEAVDAGGVELTEDELVS NLIVLFNASFVTTV  
YMLSNGLPVLLAHPEVAAALATDPVLTAGAVDEILRLQAPVHLLARAAPR  
DTV LGGVPI PQGQNVLLLVA AANRDP AHFPDPDRFDPWRSGPPSLAFGLG  
LHYCLGA AVSRLEGR LALPRLLSRF PRLRIMEQPVYSGSLFLRGIDKLSV  
SPGEGSTRE

>CYP105AB8 (2562136149) *Salinispora arenicola* CNY230

MTETASSRLTDTEFPVQRECPFAEPVEYEQIREQSSIAMVRLTGGGEAWW  
ISGHEQGRAVLADRRFSSDRKANFPFVSTDPAIRKRLHAQPLSLISMDG  
AEHTQARRALIGEFTVRRLAALRPRIQQIVDQCIDEMLTDDQRRADLVKT  
LSLPVPVSLVICELLGVYPYADHDFEQEHTATLVRRNTASEVRQHSIDELNA  
YLGALIDRKLASPDDDLGRQIARQHRDGTFRSSMVSLAFLLLVAGHET  
TANMISLGVVGLLQHPEQLAMIKDDPKTPLAIEELLRFFFTIVDSVTSRV  
ATEDVRFGDTTINAGDGVVVVSGLSADWDPTVFADPDRLDLERGARRHHLAF  
GFGPHQCLGQNLARLELQIVFDTLFHRIPTLRLAAPLKDIPFKTDAAIYG  
ARELPVAW

>CYP1005A1 (2562136417) *Salinispora arenicola* CNY230

VSAVLFRSWTKTAGTRWPDVTRVADQSGTEHLVVTRHALVRQVLTQATY  
RPDNALAEAVTPIPVAAALRVLAGHRFRLPPTLANNGGVSHPAIRALVADAL  
HPTKVAAQRPWLTGLVADRVASIRTTLDSGGPVDLYADLTADLPLLVLAR  
LVELPDAPVNAVVKQFARAALFWAPLDADRQLALADEVGRFHQVLRFA  
DTGGGLAAALRATGHSPDVLVGALFFLLVAGQETTSQFLTLLHRLSGEP  
TIRAALRAGSSSVADVVEEGLRLEPPIVWRRVAAVDSTLGGTTVAAGTS  
VLLWLARAGRDPVVAAPDEFPRPGQRGSRRLAFGAGAHRCCLGDQLARME  
AAVVVEQATPLLDGVTVVRPPWYPDNLTFRMPDAFVVRR

>CYP245A7 (2562136635) *Salinispora arenicola* CNY230

MPSATLPRFALTGWSRENIVNYPYPVYQRYREVASVHRGEPGGDAPDTFYV  
FSYDEVVQVLSSNCFGRGRSLDAAKASVPVPAEQKALRAIVENWLVMFMDP  
PRHTDLRSLNRSFSRPRIVTELPRPRIARIAQELLRLGQQVDVDLVESEA  
APLPILVISELLGIPEERRAWLRANALALQEASSSRAGRDVDGYARAEVA  
AQEFTEYFREQVRLRRGRAGGDLITILANAQQRGAPVSLDAIVGTCVHLL  
TAGHETTTNSLAKAVLALREHPAVLDELRGAEGLTTDAVEEFLRYDPPVQ  
AVTRWAHQDITLGGCDIPRGSRVVALLGSANRDPARFPSPDVLVRRPAD  
RHLSFGLGIHYCLGATLARAELEIGLQALLDGVPRTLGYGTQHVDYADDLV  
FHGPSRLVLVNLGERCK

>CYP244A4 (2562136639) *Salinispora arenicola* CNY230

MSTTTNTELTEAPETNMPVDPLFDCMPDLIAAARVAPVVRIPYLGRHAW  
VVCDELVLKQALHTPKMGKDIALVPEWMRQPLMVTAQPDPEYARAMIMS  
DGENHARIRRIHAPVLSRPNTERWGERVADKVEGFLDELSQAGSGGSTEV  
NVVTNYTHKIPLAFISEMLGLPPEAEHRLRGITDIMLYSSDYAARREAIG  
GLFGAVEDWVRNPADLRDGVITGLLAASDGPDAAVTEGEVIVWTLGMIIT  
GYETTGSLISTSLYEAIRRPPHERPKTDEDITAWIEETLRVHPPFPHPPTW  
RFPLEDIELGGYLIPKGAPVQVSIAAANRKPGEAGDSFDAERRGHGHLSE  
GLGMHYCIGAPLVRLEAQIAVRGFLRRFPQARLSAETAVQWESEWMIRRM  
SVLPAVLS

>CYP166A4 (2562137334) *Salinispora arenicola* CNY230

MTDAISFELPWARTDKFDPPAVFDALREQRPLARMRYPDGHVGWIVSSYE  
LVREVLGDPRFSHSCAVGHFPVTHQGQVIPTHPQIPGMFIHMDPPEHTRY  
RRLLTGEFTVRRTSRLTGHVEGVATEQIEVMREHGAPADLVATFARPLVL  
RVLSGLVLGLPYGERDRYLHAVTLLHDAEADPAEAAAAAYEQAGAYFDEVIE  
RRRRQPEDDLISTLVGDGELTGEELRNIVTLLLFAGYETTESALAVGMFA  
LLHHEDQLARLRADPTKIDAAIEELLRYLTVNQYHTYRTASEDIELHGEV  
INKGDSVTVSLPAANRDPARFACPAELDIDRETSGHVAFGFGIHCCLGQN  
LARVELRAGLSALLRAFPNLRALVPADEVPLRLQGSVFAVKNLPVCW

>CYP208A12 (2562137442) *Salinispora arenicola* CNY230

MTLDTITPRVPLGPPRTAALRMLLVMKRDRLGMLTSAAARYGDASRLPVG  
HKALWFFNHPRYAKHVLADNSANYHKGIGLVHARRALGDGLLTSEGLWR  
KQRKVIQPAFQSRRIAQQAGMIAEEAFALVERLRARAGAGPVELTAEITG  
LTLGVLGRSLLDADLAGFDSIGDSFATVQDQAMFELETINAVPMWIPLPR  
QIRFRRARRKLQAVVDTLVDGRAGNLADRVDVLSRLILSARGEADPRVGR  
ERLRDELVTLLLAGHETTASTLGWTLSLIDRHPGVWERLHAEAVEVLGDR  
LPEYDDLRLRLRYTVMVVEEAMRLFPPVWLLPRRALAPDTIGEYRVANAD  
VVISPYTLHRHPEFWPNPERFDPERFAPGQAADRPRYAYLPFGAGPRFCV  
GNNLGMMEAVFVIALLCRHLRLTGVPGYRLVPEPMLSLRIRGGGLPLVVRP  
VS

>CYP285A9 (2562137483) *Salinispora arenicola* CNY230

MKLTKPAEHEPVDLEKADLVDPVHGEEDPHAIWHAMRERDPVHWQQVDE  
RLGYWSATRYEDVARVLRDHRVFTSEHGTLNLLGKKDPASRKQLPVTDP  
PRHTKMRSFPVQALNSKVLERHREQIREEAQRLLASVPDGEFFDFAEMVG  
KLPMAVTGTLMGLDREDWPQLTYLTSQAIAPDDPEFVLPEGGEAALARAH  
RELFAAFEQSLSRKKGKNGDLIDVLRTEMDDGRKLRPGEISNSYSLLL  
GANVTTPHVPNAAMGELAKDGKYADWASHPELFESGINEALRWSSPASHF  
LRYAKTDVELSGVTIRQGEVAAWIGSANRDATVFPDPYEFDIRRDPRNH  
LAFGELPCRATSEAFISLRPPDGRRRRPAEEEEAFTQSRRLASAPFRSNA  
DVKDRSAGDTLSTTSEPVSPPIREGNPR

>CYP107FS2 (2562137536) *Salinispora arenicola* CNY230

MPVPQGEQNLTTTEVFADPKALFATLGSRQPLHRISLPDGMFAVLVTGNRE  
ARQALSDPRLVRSITAAAPELHKYHPLASDDYALSRHMLFADPPDHGRMR  
KLVSTAFTRRRVEQMRPRIQQITDDLIDVIAAKGEADLVETLALPLPIAV  
ISEMLGVPFADRSEFERHAEVLTGINASSGFDALIAAGRWFDEYLAELVQ  
QRRREPQDDLISGMLAAQDKGDRLTDVELRSNALLLLSAGFETTUNLVAN  
GLLALLRHPEAMAALRSEPNLMTTAVDELLRYDSPVSCVTYHFAQEPVEI  
GGFEIRSGEHVIVAAAAANHDPTVFADPSRLDLRREGSGQILSFSGIHF  
CLGAPLARLEGEIAFGTVLRLLAGLRLAVPTDSLWVKASFVLHRLRLPV  
TFTPDRAPNPIDSVHTV

>CYP105CN1 (2562137537) *Salinispora arenicola* CNY230

MAAPAPQATQSTTPHAPSYPPLPRECPYRPSAGTARLRDAGPVSTVRLYDG  
RTAWLVTGAAEARALLADSRVSNRADFPNYPVMDERHLSMRATREMAREE  
EGGFAAALFGMDPPEHTRQRQLLLPRFTVVRQVAARRPAIQRIVDEHLDAM  
EANGSPADLVSAFATPVPTMVVCTHLGVYPYQDRTRFEPVAVAGLFEPDRAD  
AAMAELTAYLHQLIETKQSEPGDGVIDHLIANHLRPGAIDRAELVAIASA  
ILVAGTVTTSSAIALGTLALLTAPGQYAALVDNPDLPVGAUNEILRYLSL  
VEQLARVATEDIEIGGKLIRAGDGIIVSFAAGNLDPNVTHPDRLDVALP  
PTNHAFASHGIIHCIGQNLALLELDIAFRALVSRFPTLRLAVPAEQLPY  
FAGDVPRLACLPTVW

>CYP105CP2 (2562137539) *Salinispora arenicola* CNY230

MTKSMPVQDLPAFFIPRECPYRPSAQHVSLRSGGPMKVRVLYNGRTAWLV

TDSA HARAVLS DYRRVSIKPYHGNYPLLN EEF EKVVDSGYADV LFGVDPP  
EHTRQRQMIMPSFTLRRTAVLRPD IQRIVDDKLD EMMRHGAPGDLVTEFA  
QPVP SMVMSFLLGVPWEDHEEFETPAHKLFVPELAE EATTEL GAYLERLI  
QKKEQPGGTPGGTG LLDLIRDHLRAGALS RDELVHIAMAMLVAGTD TTT  
NVISLGT LALLDNPDQWAALRDN PDELIPGAVEEILRYTSLIEAFARVAV  
SDIELNGAVIKEGEGILISSAGVNFDPALAPDPGRFDIRRP RPSPFSFSH  
GIHRCPGDNLARLELEIAFRSLVTRMPNLRTAKPIDQIPSNNDGTLQRL  
YELPVVW

>CYP107Q4 (2562137639) *Salinispora arenicola* CNY230

MTTTAETS AETID LFSPEVVADPFGWYARLREETGPTTGTLNIGTMMGGP  
EMWLVTTRYEDVRQVLTDP RFLTNP PADSPLEDIRAGVFKRLDFPPDLIPW  
MANLLNVSDGEDHTRLRKLVS YALTAHRIGKLRPRVEKITADLLDKLAED  
GKDGSPVDLVEEYCYPLPVTVICELVGIDE PDRPHWRAGDSMATMNGER  
IPTTLVKCIELARELIAKRRAEPQDDLVTALVQAQAE DQNRVSDDEIIGI  
LFSLVTAGHQTTTYLIGNSVILLLENPDQLARLKENPSMWPQAVRELQRL  
GPIQFAQPRFPSEDIELGGVTIPRGAPVAPLLLAANTDPRRFPDPNKLI I  
DRLAVGSEGLHGF GKGIHRCLGQH LAYQEA E VALQGLFTRFPDLSLAVPR  
EEIPWILRPGFTRTRTLPLKLV

>CYP105G5 (2562137640) *Salinispora arenicola* CNY230

LTIETTETTPADDSLRAPLPRQFMQRDDPSKLP PALAALAEQSPVGRSTL  
PDGDPFWMVSGYDEARAVLS DPRFSSDRFRYHPRFKKLSGQLGERLRNDK  
ARAGSFINMDPPEHTRYRKL LTGQFTVRRMRQLTVRIEQIVTEQVDVMLA  
EGNSADLVSAFAVPVPSLMICELLGVRYEDRTEFQRR AAGLLQTDLP IKQ  
AVENLEAQRAF MQRLVTDKR RTPADDMISGLVHHAGAE PPLTDDELVGIA  
TLLLFLAGLDTTASMLGLGMFMLLQRP EQMAVLRDDPSRIGDAVEELLRYL  
TVVSTGLFRFAKEDVVLGDEH IPAGSTVVVSLMAANRDGRHWPEPETLDV  
TRVRSSHLAFGHGVHQCLGQQ LARIELTVGITELLRRLPNVRLAVPPADV  
PLRNDMITYGVHRLPILWDTF

>CYP1051A1 (2562137666) *Salinispora arenicola* CNY230

MATDAAITRARTVPAWKALPAAVRDTHRAFVDVGNWSDGDVVRVSLGVSR  
PYLVTNPAHVQEVLHERAAIYPRGDDTALWRSVRKLVGDGILAEGDAWAA  
SRRVLAPMFRPARINAMVD TMADA IAGAVDDLHGAGTAGTPIDVGRELSR  
IVCSAIMRVFFADRITVQDALRIMKAQETIVTAMAPRILAPLVPWWIPMP  
GDRRFRAAVRSIDNILLPVLRLQAQRQPDDGDDL SRLVVRARADDGRALSE  
KRMRDDLVSMVAVT TETSTVVL TWLWPLL ANHPDVANRLYDEIDRVVGGG  
PVRGDHLAELTYPMVLDELLRLYPAGWILPRRAAATDVLGGVRINKGAT  
VILSPYVTQRMTAWWGPTAEAFDPERFAAGREAADGRHRYAYYPFGVGMH  
RCLGEHLFNLEAILIVATLLSRFRFALTDTSMPGVKVA ASTRPARTVEMI  
LKPVAPVPAR

>CYP211B2 (2562138554) *Salinispora arenicola* CNY230

MDVSEAI AVLISPSGRLDPYPTYEQ LRAHG PVSRTTAGL FVVVTGYAEADM  
VLRDPRFVVLDDDLRDDVFPHWQDSPA IKS IARSMLRTNPPDHSRIRRLA  
AGAFTPRRVAAMREVVTAQADELVDEMIRAGRDGARVDFMDMFAYPLPVA  
VICALLGVPAADRSRFRRWAGDLTGILEPEITPEELAGADAGADELRDYF  
TGLIEQRRRAPADDLTALVQAHDADGDRLSGEELLANLVVLLVAGFETT  
TNLLGNGLVVL LTRPEAAAALRDEPDLAPGYVDELLRYDSPVQLTTRTVR  
ESVSFAGTELPADSWLLVLLGAANRDPRRFPDPARFDPGRAQSQPLSFGA  
GPHYCLGAGLARLEAQVAFPLLLRRLPELALAGRPSRRTRLT LRGYETLP  
ITVGAVTADRGT PAGVAPGTP

>CYP105CT1 (2562138893) *Salinispora arenicola* CNY230

MNSPNHMPADRSLTAPTSGCPMALSRGRVGLDVADEISELRDGGRLGRIT  
TAFGQEATLITRYDEVRAQMADSVVFNVAGVPSPPALVDGGFDTESVRRR  
RTVGNLIMLDPPEHTRLRRMVAAWFTTRRVERLRPRVVEIIDAALDEMER  
SGPPVDLVAMFAKTVPITVICELIGVPEELRERYRRRAERAVSASAVSTP  
LDELRLREAGWVSRELIEYHRENPSDDIIGMLLREHGTDSDHDDGITDDE  
LVGLANALLIAGHETTTQMLSMGTLALLRHPDQLALLRDDPSIVAGAVEE  
LLRYVGVHLHGGFVRVATRDTRLGGHRIHAGELVVPALTAANRDPRLLEDG  
DRLDITRPPTSHVAFGHGVHFCIGAPLARMELEAFALLRRFPGLRLAV  
PDSELEFTQGTTVYSLRGLPVTW

>CYP154M5 (2562138910) *Salinispora arenicola* CNY230

VEQSCPYKLDVTGRDVHAEGEAIARARGPVAQVELPGGVQGWSVTGYQAAR  
QVLADPRFAKDPKKWPAYTSGAIPPNWPLIGWLLMDNMTNDGADHQRLR  
KLVSHGFTPRQVERTRPLIVKIVNDLLDGLSSAGPDEVVDLKGRFATPLP  
ARVICDMFGVPEALRASVLRGAQVNVTSISGEEAEANVEQWHRELLELV  
EAKREKPEDMASLLIAAKEEDGSTLTQEEVVGTLHLMLGAGSETLMNAL  
SYAVLGMLSNPGQYEMVRNGTSSWDDVIEETLRAQAPVAQLPLRYATEDV  
AVGGAVIKAGDPVLMGFTAIGRDPVHGETAGDYDITREDKTHLSFGHGV  
HFCLGAPLARLELKIALPALFERFPNMTLAVRPDQLEPQGTFFIMNGHREL  
PVRLGQPATVLA

>CYP105J3 (2562139009) *Salinispora arenicola* CNY230

MTDSVAFPQGRVCPHPAPGYRPLAVQRPLAQVTLYDGRRVWAVTTRDLA  
RRLLDVDPRISSDRNTNPAWPAIVPIVAAAVNDAQQKVLKIATALVGTGPE  
HKAQRKMLIPSFTFRRMNALRPMIQEIVDQQLEMIKSGAPTDLIPAFAS  
AVPVTVLYRLMGIPDDDHGIFEKLSHQLLAGPNANEAYDQLMGYMSRLIA  
ERRRNPEGGLVDDLAAQHGANDDADHDELVSTLVVQVAGNHGTTGSMIAL  
GLFALLQHPEQLAELRADPSLMPTAVDELLRFLSVPDVTRLAADDIEVE  
GTIIRKGDGVFFITSLINRDTDVHDAPNSLGWHHASAADHLTFGFGAHQC  
LGQSLARITMEIALGALIDRLPSLRLAVPAEEVPFLPAASLQVIAELPIT  
W

>CYP1902A1 (2562139172) *Salinispora arenicola* CNY230

MVAIGRITYNPVGPFAFFIDPYPHYAQLRAENPVHHTKYGFVVLTRQKQIV  
EAYRHPALSRNTMLWEDFATWRRGSTDGPLERMMANWLV MIDPPRHTPLR  
AIHEQVFTRRLLDAATSVVESIVSELLAPGRAAGGMDLVGEFADRIPVYL  
INHLLDLPRADWDRIWEWSRAIALTNEPMLTSKVL RAGEDARTAMGEYFD  
PLIACRRATPGDDVLSGLAVTEVDGVRLTSEELQDSLAFLYQAGHPTSTH  
LISLAVHSLLRHPDQLDRLRADPSLIPDAVEELHRYDGPVQMNDRVAVED  
VHLFGEHLHRGQLVRLCVASANRDEDHHPQAARLDVTRTVTDQLGYGHGL  
HHCVG AHLGRVQAQAALRALLAAAPGLRLTGDRLRFLPSASNRGLVALPV  
AF

>CYP107NF1 (2562139188) *Salinispora arenicola* CNY230

MPGYSLDSPARLDTDDFVADAHGVFATLREVAPAVPVIINGGIHAWLITR  
YDVAKQAFSTDMAKDVAAHWRAFHAGEVPFTGDVAVAAARRNILSTDPPDH  
TRLRSALAAAFTPRRVEALRGWIGRIVADLLNSIASAGSADLVADFALPI  
PMTVICELFGVPEEHRPHIRSWTETLFHGAEPDRMRQASDDIDSLLAEVI  
ASRRARP GDDFTSTLVRAQDEGQLSTVELVMLLRAMLAGGNETTINLLGN

AAAALLRWPDPQRATLTADPQRWPDATIEEVLRRDGPIQNSIWRFATTDIKI  
GEVTIPCGDAIIIALAAAGRDGRRFADPDRFDIGRTDQAHLAFGRGIIHHC  
IGAPLARLEAAVALPALFARLPDLRLATSWEQLRYRRSTMSRSLVSLPVK  
FTPASPDHPAHP

>CYP1223D1 (2562139189) *Salinispora arenicola* CNY230

MSTVVSAMQTLRSEAGRADPFFPIYAEHLKLGAVCAVDDPAERYQFVVHGY  
DAVNHVLRDPAYRVTDAEMLERGGLRWREHPSLVAVLTSMFFTNEPRHAR  
LRGMYSRIVTSRRVNALRQIIVAIVDDLLARMAERGAGGEPLDFMAEFAP  
PMPGNVICEMMGVDPDGRSWFIPRAHIFGDLDDLKGSSAELLRTADEATV  
ELTEYFGKLIARLQKDPDDMISGFAQLQATAERIPEPELLASLLTFFNA  
GFASTSHLLGNGVPLLQGPRTIEAIQRDDVAARHVEEILRVAPPTHMAV  
RVTGEDRTVAGLTMPAGSLLLVLAAANHDPARFPDPGRFDPNRPDNRPL  
TFGAGAHFCLGAPLTRLEGQVAFPMFLFDRFPKLAPVGEATKTNRLTSLGY  
QTLPVALS

>CYP248A2 (2562139215) *Salinispora arenicola* CNY230

VLADAVTAFDPTAVDVRRDPYPSYHWLLRHDPVHRGAHQVWYVSRFADVR  
AVLGDERFARTGIRRFWTDLVGPGLLSQIVGDIILFQDEPDHGRLRGVVG  
PAFSPSALRRLEPTIEATVNDLLRPARALGAMDVVADLAYPLALRAVLEL  
LGLPAGDANAVGRWSRAVGRTLDRGATAEDMRRGHAAIAEFADYVERALA  
ERREDGADLLALMLAAHRSQMLSRNEIVSTVVTFTFTGHETVASQLGNGL  
LSLLDHPEQMELMRRQPHLVPQAVEECLRFDPVQSNTRQLVADVELHGR  
RLRRDDVVVVLAGAANRDPGRYDRPDELDIRRDPVPSMSFGAGMRYCLGS  
YLARLQLRTALGAMVALPDLRLVCSPNELAYQPRTMFRGLTRLPVAFTPA  
G

>CYP105W2 (2562139223) *Salinispora arenicola* CNY230

MTGYQDRPTGDQPGAPVPSGSTDPGIGAFPLPRRCFFSPPAEYARLRAEH  
PVVRLPMLGGDTAWVVSRHADVRQVLS DPRMSADRRRP GPFKFAPTTEGQ  
RQASFANFRPPLNWLDPPEHAICRRQIVDEF SVRRVRQSRALVERVVDTH  
LDALTAAPGADLVSTFAYPVPSQVICEVLGVYPYGEHEFFERRSTLMFRR  
STPADERARCAIREDFLD MVVTDKERRPGDDVLSRLLYRQRAGGMDHE  
AVVSMAFVLLVAGHVTTSNMIALSVLALLTHPARLARLRAEPERFPAAVE  
ELLRYFTVVEAATARTTTAEVTIGGVTTAAGEGVVALGQAANRDP RVFEH  
PDEFDPDRDARAHLAFGHGRHICPGQHLARLEMEVALSRLFRRLPGLRLT  
MEVSDLPLKEDSNIFGLYALPVAW

>CYP107AY2 (2562139297) *Salinispora arenicola* CNY230

MTAEPTPIPRSGARLGQEYDQLRKTDGVHQVLLPDASLAWLVTNPEVAAR  
ALADPRLALNRRNSRGGWSGFALPPALDANLLNLDAPDHTRLRRLVGPAF  
SPQ RVAALRPGIRRAAEHLLDTLVATSGPTDLVTGYCNPLSVQVIADLMG  
VPEAGRTNLRAWTDMLTSYPPDRDAIRRAVTELHG YVVDLIDIKQQQPG  
DDLSTLVTIEQDGRLSRDELTS LAFLILFAGYENTANLIASAVLWLLD  
HGGLNVVPISEAIEGTLRHEPPAPVAIRRFPTEDIIIGGVTI PAGDTVLL  
SVAAATRGADGKAARLAFNGNPHYCLGAALARVEAEEALTVLARRLPGLT  
LAVPPSQVRWRPTFRTHTGPAELLVGW

>CYP247A7 (2562139379) *Salinispora arenicola* CNY230

VRLTPGAARDIDLDSVNLFDLDLYTSGDPHP IWDVMRAQSPLHHQVLADG  
REFWSVTRYDDVCRVLGDYREFTSERGT VVTHLGEDDIAAGKLLTSTDPP

RHTQVRRRAIGAKLTARAVASWQDRIRDAIVRFLEPALDGDTFDLAEQALL  
LPAIVTGPLLGI PERDWQELVQLTAMVTAPSDPHFQHGSEAATLAISHHE  
LVTVVTEWVKQRRSAGGGDGSLLDHLMSVRVGGAPLTDEEIALDGYSILL  
GANVTTTPHTVSGTVLALIERPEQFEKAQADPSLLANLVEEGLRWTSACN  
FMRVALNDTRIGGGTVPAGGAVVAWIGSANRDESYFPDPHQFDITRSGAN  
RQVAFGFGPHYCIGAPLARMTLGIFFFEELVQRFSGSIELAGEPQHLSYFI  
AGMTHLPIVAQKRKTP

>CYP107EU1 (2562139582) *Salinispora arenicola* CNY230

VTIGQTLPLDVYSPEFTRDPYAIFARLREQAPVCRVTTHRGMSAWMVTRH  
ADVRALLADNRLAKDGNRIGELMPRHSTLTGAATGFPPGLTTNMVNSDPP  
DHTRLRHLVGREFTGHRVEGLRPRIEEIVDDLLDGVAACGDEADLAETLA  
RRLPIAVIGELLGVPEADRAEFFRWADTLYGGTASPEALGQAYNAIVDYL  
GRLCDAKRDPVADDLLTALVQVSADEDRLSREELVSMALLLVAGHETTS  
KQISNGVLALLLNPEQLKLLKAQPARTAGAVEELLRFEGPSLSASLRFTT  
EPVEVAGVVIPEGEFVLLSLASGNRDPEKFPDPDRLDITRSTQGNLAMGH  
GIHHCVGAALARLELEIVLSRLVARFPQMQLAVEADDLEWLVNSFFRAPL  
HLPVSLRR

>CYP1198B1 (2562139836) *Salinispora arenicola* CNY230

MSGELTDQRTAPGAGGNPLRSLMDHGIRANPYPLFGELREAGPTAVEDGS  
VVLFGGEYEHCSQILRHRDMGSDTSEAPSIKGFVVDDAERAGSSIFFMDQP  
GHGRQKRLVSKSFTPRIVKSFGPQITHIVDGLFEDFRDRGELDVVTDLAY  
PVSIGIICDLFGIPDDERDMLKEWSDDLALSTELPTLGAAIGVLNVFTRD  
EINRFGSVMAAHAYFADLIHRRRNKPGDDLVSLLATESNGERLTRFEV  
TSVLATLFLVAAHESTNLISGGILALLRNQDQMAVLRENPGIITNVVDES  
LRYDPPVHLAARMARARTTIGGYDLDPGTIVVVVMAAGNRDPAYENPDV  
FDVNRKIRNVSLAFGAGAHFCIGSGLAKLEAEIAISAFQRLKHPEVDES  
SLEYRRHIVVRGLEHMKVSFQP

>CYP105BL2 (2561692682) *Salinispora arenicola* CNQ884

MSSHSAAPDPETATPLHTLAPELTFPQFERSTPFDPPQAYTELSGRCPV  
APVSMADGKPSWLITSFEGVRTTSLSDPRFSSDMSHPGFNRTGKPVDDL  
KDTLGAMDGERHRYRRLMTGELTVRRAKAMRPVITQITDEALDQLAAAG  
PGADLVKHVAFVVPSPRVACHLVGIPLSDYELFTGMAATLMDSTSSDDQFA  
ALQNMVSYFDTLVTDREHHDRDDLGHMVRRYLATGELTRDMLIRLAWTT  
MAAGQETTAHMI GLGVAALLRHPDQLELLRREPHLLPGAVDELMRYLPLI  
QFGIPRVAMDDVEVDGQTVTAGEGVVALPPLANRDPVFERPDELDVRRN  
ARQHLTFGYGPHQCPAHALARLELEVYGRLLERFPTLRLADSDADLKVQ  
DKDIMYRVSELAVTW

>CYP105CT1 (2561693279) *Salinispora arenicola* CNQ884

MNSPNHMPADRSLTAPTSGCPMALSRRVGLDVADEISELRDGGRLGRIT  
TAFGQEATLITRYDEVRAQMADSVVFNVAGVSPPALVDGGFDTESVRRR  
RTVGNLIMLDPPEHTRLRRMVAAWFTTRRVERLRPRVVEIIDAALDEMER  
SGPPVDLVAMFAKTVPITVICELIGVPEELRERYRRRAERAVSASAVSTP  
LDELRLREAGWVSRELIEYHRENPSDDIIGMLLREHGTDSDHDDGITDDE  
LVGLANALLIAGHETTTQMLSMGTLALLRHPDQLALLRDDPSIVAGAVEE  
LLRYVGVLHGGFVRVATRDTRLGGHRIHAGELVVPALTAANRDPRLITDG  
DRLDITRPPTSHVAFGHGVHFCIGAPLARMELREAFPALLRRFPGLRLAV  
PDSELEFTQGTTVYSLRGLPVTW

>CYP166A4 (2561693433) *Salinispora arenicola* CNQ884



MTDAISFELPWARTDKFDPPAVFDALREQRPLARMRYPDGHVGVIVSSYE  
LVREVLGDPRFSHSCAVGHFPVTHQGQVIVPTHQIPGMFIHMDPPEHTRY  
RRLLTGEFTVRRTSRLTGHVEGVATEQIEVMREHGAPADLVATFARPLVL  
RVLSGLVGLPYGERDRYLHAVTLLHDAEADPAEAAAAAYEQAGAYFDEVIE  
RRRRQPEDDLISTLVGDGELTGEELRNIVTLLLFAGYETTESALAVGMFA  
LLHHEDQLARLRADPTKIDAAIEELLRYLTVNQYHTYRTASEDIELHGEV  
INKGDSVTVSLPAANRDPARFACPAELDIDRETSGHVAFGFGIHCQLGQN  
LARVELRAGLSALLRAFPNLRLAVPADEVPLRLQGSVFAVKNLPVCW

>CYP125A41 (2561693850) *Salinispora arenicola* CNQ884

MTEPRIPAGFDFTDPEVLAHRVPREEFAELRRTPVWWNAQPRGSAGFDD  
DGYWVVTRYADVMTVSRSDTYSTRENTAIARLRPDTTREDIEMQRVIML  
NVDPPHETKLRAIVSRGFTPRAINALRGSLAERAHIVRDAAVRGVGVDFV  
TDVACELPLQAI AELIGVPQHRRKVFWDWSNQLIGYDDPAYGTDPLTASA  
ELLYAMEMAEERQSPSDDLVTKLUNAQIDGELTDEFGGFFVMLLAVA  
GNETTRNAITHGMVAFLDNPEQWELFKAERP KSAVEEII RWATPVNVFQR  
TALVDTV LGGQAI SAGQ RVALFYGSANFDEAVFEDPERFDITRSPNPHLG  
FGGSGAHFCLGANLARLEIELIFNSIADHLDPDIRKVAAPQRLRSGWINGI  
RQMPVRYR

>CYP211C1 (2561693998) *Salinispora arenicola* CNQ884

VVDVEELLTRLYSAQGRQDPFPVYADLHAQGPIAALPPEPERRRVA AVAV  
GYDLVGAVLRDPEWSKAPPPGWTEQEILRTLQTSMMFINPPDHGRMRHVF  
AGTFTPRRLGALEPVVNRVADELDRMADAGAGGLDFVAEFAYPLPARVM  
AEFIGIPETELDWYRERVVIDAFLDVAGKTPQRLAAAANAAGAE LRAFYG  
ELLARRRRTPGEDLISGLVEAVDAGGVELTEDELVSNLIVLFNASFVTTV  
YMLSNGLPVLLAHPEVAAALATDPVLTAGAVDEILRLQAPVHLLARAAPR  
DTVLGGVPI PQGQNVLLLIAAANRDP AHFPDPDRFDPWRSGPPSLAFGLG  
LHYCLGAAVSRLEGR LALPRLLSRFPRLRIMEQPVYSGSLFLRGIDKLSV  
SPGGREYP

>CYP211B2 (2561694498) *Salinispora arenicola* CNQ884

MDVSEAI AVLISPSGR LDPYPTYEQ LRAHG PVSRTTAGLFVVTGYAEADM  
VLRDPRFVVLDDDLRDDVFPHWQDSPAIXIARSMLRTNPPDH SRIRRLA  
AGAFTPRRVAAMREV VTAQADELVD EMIRAGRDGARVDFMDMFAYPLPVA  
VICALLGVPAADR SRFRRWAGDLTGILEPEITPEELAGADAGADELRDYF  
TGLIEQRRRAPADDLTALVQAHDADGDRLSGEELLANLVLLVAGFETT  
TNLLGNGLVLLTRPEAAAALRDEPD LAPGYVDELLRYDSPVQLTRTVR  
ESVSFAGTEL PADSWLLVLLGAANRDP RRFDPARFDPGRAQSQPLSFGA  
GPHYCLGAGLARLEAQVAFPLLLRRLPELALAGRPSRRTRLTIRGYETLP  
ITVGAVTADRGT PAGVAPGTP

>CYP208A12 (2561694824) *Salinispora arenicola* CNQ884

MTLDTITPRVPLGPRTAALRMLLVMKRDR LGMLTSAAARYGDASRLPVG  
HKALWFFNHPRYAKHVLADNSANYHKGIGLVHARRALGDGLLTSEGDLWR  
KQRKVIQPAFQSRRIAQQAGMIAEEAFALVERLRARAGAGPVELTAE L TG  
LTLGVLGRSLLDADLAGFDSIGDSFATVQDQAMFELETINAVPMWIP LPR  
QIRFRARRRKLQAVVDTLVDGRAGNLADRVDVLSRLILSARGEADPRVGR  
ERLRDELVTLLLAGHETTASTLGWTL SLIDRHPGVWERLHAEAVEVLGDR  
LPEYDDLRLRLRYTVMVVEEAMRLFPPVWLLPRRALAPDTIGEYRV PANAD  
VVISPYTLHRHPEFWPNPERFDPERFAPGQAADRPRYAYLPFGAGPRFCV  
GNNLGMMEAVFVIALLCRHLRLTGVPGYRLVPEPMLSLRIRGGGLPLVVRP

VS

>CYP107FS2 (2561694931) *Salinispora arenicola* CNQ884

MPVPQGEQNLTTTEVFADPKALFATLGSRQPLHRISLPDGMFAVLVTGNRE  
ARQALSDPRLVRSITAAPELHKYHPLASDDYALSRHMLFADPPDHGRMR  
KLVSTAFTRRRVEQMRPRIQQITDDLIDVIAAKGEADLVETLALPLPIAV  
ISEMLGVFPFADRSEFERHAEVLTGINASSGFDTIIAAGRWFDEYLAELVQ  
QRRREPQDDLISGMLAAQDKGDRLTDVELRSNALLLSAGFETTVNLVAN  
GLLALLRHPEAMAALRSEPNLMTTAVDELLRYDSPVSCVTYHFAQEPVEI  
GGFEIRSGEHVVIAAAAAANHDPTVFADPSRLDLRREGSGQILSFSGIHF  
CLGAPLARLEGEIAFGTVLRLAGLRLAVPTDSLWKASFVLHRLERLPV  
TFTPDRAFPNIDSVHTV

>CYP105CN1 (2561694932) *Salinispora arenicola* CNQ884

MAAPAPQATQSTTPHPPSYPLPRECPYRPSAGTARLRDAGPVSTVRLYDG  
RTAWLVGTAAEARALLADSRVSNRADFPNYPVMDERHLSMRATREMAREE  
EGGFAAALFGMDPPEHTRQRQLLPRFTVRQVAARRPAIQRIVDEHLDAM  
EANGSPADLVSAFATPVPTMVVCTHLGVQYQDRTRFEPVAGLFEPRAD  
AAMAEALTAYLHQLIETKQSEPGDGVIDHLIANHLRPGAIDRAELVAIASA  
ILVAGTVTTSSAIALGTLALLTAPGQYAALVDNPDLPVPGAVNEILRYLSL  
VEQLARVATEDIEIGGKLIRAGDGIIVSFAAGNLDPNVTTHPDRLDVALP  
PTNHLAFSHGIHHCIGQNALLELDIAFRALVSRFPTLRLAVPAEQLPY  
FAGDVPRACLPPVTW

>CYP105CP2 (2561694934) *Salinispora arenicola* CNQ884

MTKSMPVQDLPAFFPIPRECPYRPSAQHVSLRSGGPMKVRLYNGRTAWLV  
TDSAHAARAVLSDYRRVSIKPYHGNYPPLLNEEFKVVDSGYADVLFGVDP  
EHTRQRQMIMPSFTLRRTAVLRPDIQIRIVDDKLDMMRHGAPGDLVTEFA  
QPVPMSMVSFLLGVFWEDHEEFETPAHKLFVPELAEAEATTELGAYLERLI  
QKKEQPGGTPGGTGLLDDLRDHLRAGALSRDELVHIAMAMLVAGTDTT  
NVISLGTALLDNPQWAAALRDNPDDELIPGAVEEILRYTSLIEAFARVAV  
SDIELNGAVIKEGEGILISSAGVNFDPALAPDPGRFDIRRPPRPSFSFSH  
GIHRCPGDNLARLELEIAFRSLVTRMPNLRATAKPIDQIPSNNDGTLQRL  
YELPVVW

>CYP245A7 (2561695815) *Salinispora arenicola* CNQ884

MPSATLPRFALTGWSRENIVNPYPVYQRYREVASVHRGEPGGDAPDTFYV  
FSYDEVVQVLSSNCFGRGRSLDAAKASVPVPAEQKALRAIVENNLVFMDF  
PRHTELRLSLNRSFSPRIVTELPRPRIARIAQELLSRLGQQVDVDLVESFA  
APLPILVISELLGIPEERRAWLRANALALQEASSSRAGRDVDGYAQAEVA  
AQEFTEYFREQVRLRRGRAGGDLITILANAQERGAPVSLDAIVGTCVHLL  
TAGHETTTNSLAKAVLALREHPAVLDELGAEGLTDDAVEEFLRYDPPVQ  
AVTRWAHQDITLGGCDIPRGSRVALLGSANRDPARFSPDVLVRRPAD  
RHLSFGLGIHYCLGATLARAELEIGLQALLDGVPTLGYGTQHVDYADDLV  
FHGPSRLVLVNLGERCK

>CYP244A4 (2561695819) *Salinispora arenicola* CNQ884

MSTTTNTELTEAPETNMPVDPLFDCMPDLIAAARVAPVVRIPYLGRHAW  
VVCDELVKQALHTPKMGKDIALVPEWMMRQPGLMVTAQPDPEYARAMIMS

DGENHARIRRIHAPVLSPRNTERWGERVADKVEGFLELDELSQLAGSGGSAEV  
NVVTNYTHKIPLAFISEMLGLPPEAEHRLRGITDIMLYSSDYAARREAIG  
GLFGAVEDWVRNPADLRDGVITGLLAASDGPDAAVTEGEVIVWTLGMIIT  
GYETTGSLISTSLYEAIRRPPHERPKTDEDITAWIEETLRVHPPFPHTW  
RFPLEDIELGGYLIPKGAPVQVSIAAANRKPGEAGDSFDAERRGHGHLSE  
GLGMHYCIGAPLVRLEAQIAVRGFLRRFPQARLSAETAVQWESEWMIRRM  
SVLPAVLS

>CYP105AB8 (2561696028) *Salinispora arenicola* CNQ884

MTETASSRLTDTEFPVQRECPFAEPVEYEQIREQSSIAMVRLTGGGEAWW  
ISGHEQGRAVLADRRFSSDRKANFPFVSTDPAIRKRLHAQPLSLISMDG  
AEHTQARRALIGEFTVRRLAALRPRIQQIVDQCIDEMLTDDQHRADLVKT  
LSLPVPSLVICELLGVADHDFFQEHTATLVRRNTASEVRQHSIDELNA  
YLGALIDRKLASPDLLGRQIARQHRDGTFRSSMVSLAFLLLVAGHET  
TANMISLGVVGLLQHPEQLAMIKDDPKTPLAIEELLRFFTIVDSVTSRV  
ATEDVRLGDTTINAGDGVVVSGLSADWDPTVFADPDRLDLERGARHHLAF  
GFGPHQCLGQNLARLELQIVFDTLFHRIPTLRLAAPLDKIPFKTDAAIYG  
ARELPVAW

>CYP1005A1 (2561696065) *Salinispora arenicola* CNQ884

VSAVLFRSWTKTAGTRWPDVTRVADQSGTEHLVVTRHALVRQVLTDDQATY  
RPDNALAEAVTPIPVAAALRVLAGHRFRLPPTLANNGGVSHPAIRALVADAL  
HPTKVAAQRPWLTGLVADRVASIRTTLDSSGPPVDLYADLTADLPLLVLAR  
LVELPDAPVNAVQKFARAALFVAPLDADRQLALADEVGRFHVQLREFA  
DTGGGLAAALRATGHSPDVLVGFLLVAGQETTSQFLTLLHRLSGEP  
TIRAALRAGSISVADVVEEGLRLEPPIVWRRVAAVDSTLGGTTVAAGTS  
VLLWLARAGRDPVVAAPDEFPRPGQRGSRRHLAFGAGAHRCCLGDQLARME  
AAVVVEQATPLLDGVTVVRPPWYPDNLTFRMPDAFVVRR

>CYP105CH1 (2561696407) *Salinispora arenicola* CNQ884

VSSLPLPTYPKLRDPADPLLPAPAEYLAIQSEKPIAKVLLPSGRPTWLITG  
HALARQVLTTEPCVSVDRRHNPFPYPVNPDAVVAQVARWTYILLGDDPPL  
HTERRRLLI SEFTVRQAQAMRPRIQQLVDFHLEQLIAAGPGADF SKHFAM  
QVPSAVICEMLGVPFADHDYFQERTALQLRRDVPVAAQKQAIDELLAYFE  
QLIQEKSSHPGDDVLSRLIVSNRETEAFDHEALVALGLLL VGGHETTAN  
TLTLATATMLERPEIAEQLRDPSLMPSAVEEFLRYFSVAVAVSRIATAD  
LQVGGQLVRAGESMLLVNLTARDGTVFPEPHRLDIRRNARNHLAFSHGI  
HOCMGQNLARVEMQIALDTVLRRLPGLHLVAPFEELPFKYRHLVWGIEEL  
RVAW

>CYP105G5 (2561696678) *Salinispora arenicola* CNQ884

LTIETTETPPADDSLAPLPRQFMQRDDPSKLPPALAAAEQSPVGRSTL  
PDGDPFWMVSGYDEARAVLSDPRFSSDRFRYHPRFKKLSGQLGERLRNDK  
ARAGSFINMDPPEHTRYRKLLTGQFTVRRMRQLTVRIEQIVTEQVDVMLA  
EGNSADLVSAFAVPVPSLMICELLGVRYEDRTEFQRRAGLLQTDLPKQ  
AVENLEAQRAFMQRLVTDKRRTPADDMISGLVHHAGAEPPLTDELVGIA  
TLLLFAGLDTTASMLGLGMFMMLQRPEQMAVLRDDPSRIGDAVEELLRYL  
TVVSTGLFRFAKEDVVLGDEHI PAGSTVVVSLMAANRDGRHWPEPETLDV  
TRVRSSHLAFGHGVHQCLGQQLARIELTVGITELLRRLPNVRLAVPPADV  
PLRNDMITYGVHRLPILWDTF

>CYP105W2 (2561696713) *Salinispora arenicola* CNQ884

MTGYQDRPTGDQPGAPVPSGSTDPGIGAFPLPRRCPPFSPPAEYARLRAEH  
PVVRLPMLGGDTAWVVSRRHADVRQVLSDFRMSADRRRPGFPKFAPTTEGQ  
RQASFANFRPPLNWLDPPEHAICRRQIVDEFVSRRVRQSRALVERVVDTH  
LDALTAAPGADLVSTFAYPVPSQVICEVLGVPYGEHEFFERRSTLMFRR  
STPADERARCAREIRDFLDVVVTDKERRPGDDVLSRLLYRQRAGGVDHE  
AVVSMAFVLLVAGHVTTSNMLALSVLALLTHPARLARLRAEPPERFPAAVE  
ELLRYFTVVEAATARTTTAEVTIGGVTTAAGEGVVALGQAANRDP RVFEH  
PDEFDPDRDARAHLAFGHGRHICPGQHLARLEMEVALSRLFRRLPGLRLT  
MEVSDLPLKEDSNIFGLYALPVAW

>CYP248A2 (2561696721) *Salinispora arenicola* CNQ884

VLADAVTAFDPTAVDVRRDPYPSYHWLLRHDPVHRGAHQVWYVSRFADVR  
AVLGDERFARTGIRRFWTDLVGPGLLSQIVGDIILFQDEPDHGRLRGVVG  
PAFSPSALRRLEPTIEATVNDLLRPARALGAMDVVADLAYPLALRAVLEL  
LGLPAGDANAVGRWSRAVGRTLDRGATAEDMRRGHAAIAEFADYVERALA  
ERREDGADLLALMLAAHGSQLMRNEIVSTVVTFIFTGHETVASQLGNGL  
LSLLDHPEQLELMRRQPHLVPAVEECLRFDPVQSNTRQLAADVELHGR  
RLRRDDVVVVLAGAANRDPGRYDRPDELDIRRDPVPSMSFGAGMRYCLGS  
YLARLQLRTALGAMVALPDLRLACNPNELAYQPRTMFRGLTRLPVAFTPA  
G

>CYP105J3 (2561696873) *Salinispora arenicola* CNQ884

MTDSVAFPGQGRVCPHPAPGYRPLAVQRPLAQVTLYDGRRVWAVTTRDLA  
RRLLVGPRISSDRNTNPAWPAIVPIVAAA VND AQQKVLKIATALVGT DGPE  
HKAQRKMLIPSFTFRMNALRPMIQEIVDQQLD EMIQSGAPTDLIPAFAS  
AVPVTVLYRLMGIPDDDHGIF EKL SHQLLAGPNANEAYDQLMGYMSRLIA  
ERRRNPGEGVLDDLLAQHGANDDADHDELVSTLVVQVAGNHGTTGSMIAL  
GLFALLQHPEQLAELRADPSLMPTAVDELLRFLSVPDAVTRLAADDIEVE  
GTIIRKGDGVFFITS LINRDTDVHDAPNSLGWHHASAADHLTFGF GAHQ  
LGQSLARITMEIALGALIDRLPSRLRLAVPAEEVPFLPAASLQVIAELPIT  
W

>CYP107EU1 (2561696954) *Salinispora arenicola* CNQ884

VTIGQTLPLDLYSPEFTRDPYAI FARLREQAPVCRVTTHRGMSAWMVTRH  
ADVRALLADNRLAKDGNRIGELMPRHSTLTGAATGFPPGLTTNMVNSDPP  
DHTRLRHLVGREFTGHRVEGLRPRIEEIVDDLLDGVAACGDEADLAETLA  
RRLPIAVIGELLGVPEADRAEFFRWADTLYGGTASPEALGQAYNAIVDYL  
GRLCDAKRDVPADDLLTALVQVSADEDRLSREELVSMALLLLVAGHETTS  
KQISNGVLALLLNPEQLKLLKAQPARTAGAVEELLRFEGPSLSASLRFTT  
EPVEVAGVVIPEGEFVLLSLASGNRDPEKFPDPDRLDITRSTQGNLAMGH  
GIHHCVGAALARLELEIVLSRLVARFPQMQLAVEADDLEWLVNSFFRAPL  
HLPVSLRR

>CYP1051A1 (2561697067) *Salinispora arenicola* CNQ884

MATDAAITRARTVPAWKALPAAVRDTHRAFVDVGNWSDGDVVRVSLGVSR  
PYLVTNPAHVQEVLHERAAIYPRGDDTALWRSVRKLVGDGILAEGDAAWAA  
SRRVLAPMFRPARINAMVDTMADAIAGAVDDLHGAATAGTPIDVGRELSR  
IVCSAIMRVFFADRITVRDALRIMKAQETIVTAMAPRILAPLPWWIPMP  
GDRRFRAAVRSIDDILLPVLRLQAQRQPDDGDDLLSRLVRARADDGRALSE  
KRMRDDLVSMVAVTTETSTVVLTWLWPLL ANHPDVANRLYDEIDRVVGGG

PVRGDHLAELTYTRMVLDELLRLYPAGWILPRRAATTDVLGGVRINKGAT  
VILSPYVTQRMATAWWGPTAEAFDPERFAAGREAADGRHRYAYYPFGVGMH  
RCLGEHLFNLEAILIVATLLSRFRFALTDTSMPGVKVAASSTRPARTVEMI  
LKPVAPVPAR

>CYP105EJ1 (2561697271) *Salinispora arenicola* CNQ884

MAGGNSDLPSFPMARRCPHHPPEYAEMRARGAAVRVNFLGTPVWAITRH  
AEARDLLTDSRVSTDPASPGHPFGALAATAERMAGQLTMDPPEHSAHRR  
MLISEFGVRRVREMRPAIERSVDDLLDGMAGAAADLVEAYGLPLASAIM  
CQLLGVPERDHAFFHDRACAMLGGVFSSRDADVARMEMLAYLDDLVRGHK  
PGQDGVIDRLLTIRHDTGEPTEAIVGMCFMLLLGHHTTATMIPLGVHT  
LLDHPDQLAQLRAEPALWPVAVDELRLRFHSIVDWMSFDRVATADIDVGDE  
RIHAGEGIFVLGAAANRDERAFERPDDFNIHRRSRHHLAFGVGIHQCLGQ  
SLARTELEISYRRLFDRFPTIRIQPPAAGLSFKYDAAMFGLQELPVTW

>CYP1198B1 (2561697425) *Salinispora arenicola* CNQ884

MSGELTDQRTAPGAGGNPLRSLMDHGIRANPYPLFGELREAGPTAVEDGS  
VVLFGHEYEHCSQILRHRDMGSDTSEAPSIKGFVVDDAERAGSSIFFMDQP  
GHGRQRKLVSFSFTPRIVKSFGPQITHIVDGLFEDFRDKGELDVVTDLAY  
PVSIGIICDLFGIPDDERDMLKEWSDDLALSTELPTLGAAIGVLNVFTRD  
EINRFGSVAMAAHAYFADLIHRRRKPNPGDDLVSLLATESNGERLTRFEV  
TSVLATLFVAAHESTTNLISGGILALLRNQDQMAVLRENPGITNVVDES  
LRYDPPVHLAARMARATTIGGYDLDPGTIVVVLMAAGNRDPRAYESPDV  
FDVNRKIKNVSLAFGAGAHFCIGSLAKLEAEIAISAFQRLKNPEVDES  
SLEYRRHIVVRGLEHMKVVSFQP

>CYP208A12 (2517938111) *Salinispora arenicola* CNY011

MTLDTITPRVPLGPRTAALRMLLVMKRDLGMLTSAAARYGDASRLPVG  
HKALWFFNHPRYAKHVLADNSANYHKGIGLVHARRALGDGLLTSEGLDWR  
KQRKVIQPAFQSRRIAQQAGMIAEEAFALVERLRARAGAGPVELTAELTG  
LTLGVLGRSLLDADLAGFDSIGDSFATVQDQAMFELETNLAVPMWIPLPR  
QIRFRARRRKLQAVVDTLVDGRAGNLADRVDVLSRLILSARGEADPRVGR  
ERLRDELVTLLLAGHETTASTLGWTLSLIDRHPGVWERLHAEAVEVLGDR  
LPEYDDLRLRLRYTVMVVEEAMRLFPVWLLPRRALAPDTIGEYRVPANAD  
VVISPYTLHRHPEFWPNPERFDPERFAPGQAADRPRYAYLPFGAGPRFCV  
GNNLGMMEAVFVIALLCRHLRLTGVPGHRLVPEPMLSLRIRGGLPLVVRP  
VS

>CYP245A7 (2517939270) *Salinispora arenicola* CNY011

MPSATLPRFALTGWSRENIVNPYPVYQRYREVASVHRGEPGDDAPDTFYV  
FSYDEVVQVLSSNCFGRGRSLDAAKASVPVPAEQKALRAIVENNLVFMDF  
PRHTELRSLLNRSFSPRIVTELPRPRIARIAQELLSRLGQQVDVDLVESFA  
APLPILVISELLGIPEERRAWLRANALALQEASSSRAGRVDVGYARAEVA  
AQEFTEYFREQVRLRRGRAGGDLITILANAQQRGAPVSLDAIVGTCVHLL  
TAGHETTTNSLAKAVLALREHPAVLDELGAEGLTDDAVEEFLRYDPPVQ  
AVTRWAHQDCTLGGCDIPRGSRVALLGSANRDPARFSPDVLVRRPAD  
RHLSFGLGIHYCLGATLARAELEIGLQALLDGVPTLGYGTQHVDYADDLV  
FHGPSRLVLVNLGERCT

>CYP244A4 (2517939266) *Salinispora arenicola* CNY011

MSTTTNTELTEAPETNMPVDPLFDCMPDLIAAARVAPVVRIPYLGRHAW  
VVCDELVKQALHTPKMGKDIALVPEWWMRQPGLMVTAQPDPEYARAMIMS

DGENHARIRRIHAPVLSPRNTERWGERVADKVEGFLELSRAGSGGSTEV  
NVVTNYTHKIPLAFISEMLGLPPEAEHRLRGITDIMLYSSDYAARREAIG  
GLFGAVEDWVRNPADLRDGVITGLLAASDGPDAAVTEGEVIVWTLGMIIT  
GYETTGSLSLISTSLYEAIRPPHERPKTDEDITAWIEETLRVHPPFPHTW  
RFPLEDIELGGYLIPKGAPVQVSIAAANRKPGEAGDSFDAERRGHGHLSE  
GLGMHYCIGAPLVRLEAQIAVRGFLRRFPQARLSAETAVQWESEWMIRRM  
SVLPAVLS

>CYP1051A1 (2517939531) *Salinispora arenicola* CNY011

MATDAAITRARTVPAWKALPAAVRDTHRALVDVGNWSDGDVVRVSLGVSR  
PYLVTNPAHVQEVLHERAAIYPRGDDTALWRSVRKLVGDGILAEGDAAWAA  
SRRVLAPMFRPARINAMVDTMADAIAAGVDGLHGAATAGTPIDVGRELSR  
IVCSAIMRVFFADRITVRDALRIMKAQETIVTAMAPRILAPLVPWWIPMP  
GDRRFRAAVRSIDDILLPVLQRQAQRQPDDGDDLLSRLVRARADDGQALSE  
KRMRDDLVSMAVATTETSTVVLTWLVPLLANHPDVANRLYDEIDRVVGGG  
PVRGDHLAELTYTRMVLDELLRLYPAGWILPRAATTDVLGGVRINKGAT  
VILSPYVTQRMATAWWGPTAEAFDPERFAAGREAADGRHRYAYYPFGVMH  
RCLGEHLFNLEAILIVATLLSRFRFALTDTSMPGVKVAASTRPARTVEMV  
LKPVAPVPAR

>CYP105G5 (2517939551) *Salinispora arenicola* CNY011

LTIETTETPPADDSLAPLPRQFMQRDDPSKLPALAAALAEQSPVGRSTL  
PDGDPFWMVSGYDEARAVLSDFRFSDDFRYHPRFKKLSGQLGERLRNDK  
ARAGSFINDPPEHTRYRKLITGQFTVRRMRQLTVRIEQIVTEQVDVMLA  
EGNSADLVSAFAVPVPSLMICELLGVRVEDRTEFQRRAGLLQTDLPKQ  
AVENLEAQRAFMQRLVTDKRRTPADDMISGLVHHAGAEPPLTDDELVGIA  
TLLLLFAGLDTTASMLGLGMFMLLQRPEQMAVLRDDPSRIGDAVEELLRYL  
TVVSTGLFRFAKEDVVLGDEHIPAGSTVVVSLMAANRDGRHWPEPETLDV  
TRVRSSHLAFGHGVHQCLGQQARIELTVGITELLRRLPNVRLAVPPADV  
PLRNDMITYGVHRLPILWDTF

>CYP107Q4 (2517939552) *Salinispora arenicola* CNY011

MTTTAETSATIDLFSPEVVADPFGWYARLREETGPTTGTNLNIGTMMGGP  
EMWLVTTRYEDVRQVLTDPRFLTNPADSPLEDIRAGVFKRLDFPPDLIPW  
MANLLNVSDGEDHTRLRLKLVSYALTAHRIGKLRPRVEKITADLLDKLAED  
GKDGSPVDLVEEYCYPLPVTVICELVGIDEPRPHWRAGDSMATMNGER  
IPTTLVKCIELARELIAKRAEPQDDLVTALVQAQAEQDNRVSDDEIIGI  
LFSLVTAGHQTTTYLIGNSVILLLENPDQLARLKENPSMWPQAVRELQRL  
GPIQFAQPRFPSEDIELGGVTIPRGAPVAPLLLAANTDPRRFPDPNKLII  
DRLAVGSEHGLGFGKGIHRCCLGQHLAYQEAEEVALQGLFTRFPDLSLAVPR  
EEIPWILRPGFTRTRTLPLKLV

>CYP125A41 (2517939652) *Salinispora arenicola* CNY011

MTEPRIPAGFDFTDPEVLAHRVPREEFAELRRTAPVWWNAQPRGSAGFDD  
DGYWVVTRYADVMTVSRSDTYSTRENTAIARLRPDTTREDIEMQRVIML  
NVDPPPEHTKLRAIVSRGFTPRAINALRGSLAERAHIVRDAAVRGVGDV  
TDVACELPLQAIAGELIGVPQHRRKVFWDNSQLIGYDDPAYGTDPLTASA  
ELLAYAMEMAEERQSPSDDLVTKLVAQIDGELHTTDEFGGFFVMLLAVA  
GNETTRNAITHGMVAFLDNPEQWELFKAERPKSAVEEIIRWATPVNVFQR  
TALVDTVLGGQAISAGQRFALFYGSANFDEAVFEDPERFDITRSPNPHLG  
FGGSGAHFCLGANLARLEIELIFNSIADHLPDIRKVAAPQRLRSGWINGI  
RQMPVRYR

>CYP166A4 (2517940000) *Salinispora arenicola* CNY011

MTDAISFELPWARTDKFDPPAVFDALREQRPLARMRYPDGHVGVIVSSYE  
LVREVLGDPRFSHSCAVGHFPVTHQGQVIPTHPQIPGMFIHMDPPEHTRY  
RRLLTGEFTVRRTSRLTGHEGVATEQIEVMREHGAPADLVATFARPLVL  
RVLSGLVGLPYGERDRYLHAVTLLHDAEADPAEAAAAAYEQAGAYFDEVIE  
RRRRQPEDDLISTLVGDGELTGEELRNIVTLLLFAGYETTESALAVGMFA  
LLHHEDQLARLRADPTKIDAAIEELLRYLTVNQYHTYRTASEDIELHGEV  
INKGDSVTVSLPAANRDPARFACPAELDIDRETSGHVAFGFGIHCQLGQN  
LARVELRAGLSALLRAFPNRLRLAVPADEVPLRLQGSVFAVKNLPVCW

>CYP154M15 (2517940234) *Salinispora arenicola* CNY011

MNDKCPFAALDVTGQDLHGEAARLREQGPAVLVELPGGVKAWSINRYEVI  
RELLMDRRVTKNARKHWPFIKGEIPPDWEMISWVAMDNMVTAYGKDHVR  
LRKLVGRAFTQRRADALRPQVVALSTKLLDDLGGATPPGEVVDLRERFAYP  
LPAMLVASLIGMSEAALAACSKVIDMMVHTNVSPEEAQAVLRGWRAAMAD  
LIESKRRTPGEDITTDLIAAREEDGSRLSEAEADTIFAILGAGSETTIN  
FFDNAITALLSRPGQLQLLRTGAVTWDDVIDEVLRVESPLAHLPLRYAVE  
DIELDGVTIPQGDPIILVNYAAAGRDPALHGGTADEFDLARGDKTHLSFGY  
GPHYCLGAGIARMVATIGLSMLFERFPDLSLAVPVTELKRLPTFIMNGHQ  
TLPVRLTAHAR

>CYP125G6 (2517940259) *Salinispora arenicola* CNY011

VPTLLNEHVSYDGAIAIVDSGATSWIRLAERVNRWVHLLRAHGLDTGD  
RLACVTGNRRETFFEVLLAALHTGVTVPVNVNHLTVTEIGHILSDSGSRVV  
ITEELHVKAVAAAADGTAGPVAGLVLGDRVEVEGFAAVEPLLAASPAEPE  
GQVCGATMLYTSGETTGRPKGVVNNLFVTGAPYARVGRLCDYARSVLGVPR  
RERMLLDGPWYHSSQLFFALLSLLQGSRLVIRPYFDPAATLKTIDDHRT  
VTHLVPTQLVRLLRVDALTRQMFSGASLRRVWHGGGCPPEVKRSMIDWW  
GPVLVEYYGATEGGVVTLIDSAEWLARPGSVGRAVPPSEVVVVDDGGQPV  
AAGQTGQVFFRRRTGNRFHYHNAPEKTQAAYLAPDTFTYGEVGHVDEG  
LFLTGRAQDMIVSGGVNVYPAEVEAALLRHPVVRDAAVIGVADDEFGERV  
VGIVVPETAVDPDDLATHLDAHCRVSLAGFKVPRTYRVVESLPRDETGKL  
RKDALRSKFGWLSGAAMTVPRPATGQPTAHRPDIAHPTTYVSGVPHDEFA  
RRRRDEPVGWAEPLVTRHTAAGRTATRGSGFWAVTRYEDVVAASRRVTD  
FSSAAKGAFLLTDPRTPADLQQAQQLLVNMDDPHHARLRKLVTSTVFTPRAV  
RGLLASIDAHAAALVAKVVAAGEFDVVTDLAAELPLLVLADLLGVPKQDR  
ALLYGWSNHLVGFDPDFGGGDIDAYRTAMAEAFQYALNLGVERRARPTD  
DLVSLLANAEVDGTRLTDREFCNFWLLLTVVAGNETTRHLIAGTMQALTEH  
PGECARLVEGRVPMESAVEELLRWVTPIMQFRRTATRDTEIGGQAVTAGE  
KVVLYYTSANRDATVFAEPDRLDLGRTPNRQLSFGIGPHYCLGAHLARAE  
L

>CYP105CN1 (2517940298) *Salinispora arenicola* CNY011

MAAPAPQATPSTTPHPPSYPLPRECPYRPSAGTAHLRDAGPVSTVRLYDG  
RTAWLVGTAAEARALLADSRVSNRADFPNYPVMDERHLSMRATREMAREE  
EGGFAAALFGMDPPEHTRQRQLLLPRFTVRQVAARRPAIQRIVDEHLDAM  
EANGSPADLVSAFATPVPTMVVCTHLGVYPYQDRTRFEPVAVAGLFEPDRAD  
AAMAEALTAYLHQLIETKQSEPGDGVIDHLIANHLRPGAIDRAELVAIASA  
ILVAGTVTTSSAIALGTALALLTAPGQYTALVDNPDLPVGAVNEILRYLSL  
VEQLARVATEDIEIGGKLIRAGDGIIVSFAAGNLDPNVTTHPDRLDVALP  
PTNHLAFSHGIIHCIGQNALLELDIAFRALVSRFPTLRLAVPAEQLPY  
FAGDVPRLACLPTW  
TALLRVMSPHLGLSLQLTGPVSRLASNFVNGVKAMPAVIGSR

>CYP105CP2 (2517940300) *Salinispora arenicola*\_CNY011

MTKSMPVQDLPAFPIPRECYPYRPSAQHVSLRSGGPMKVRLYNGRTAWLV  
TDSAHAARAVLSDYRRVSIKPYHGNYPILLNEEFKVVDSGYADVLFVGDPP  
EHTRQRQMIMPSFTLRRRTAVLRPDIQRIVDDKLDEMRRHGAPGDLVTEFA  
QPVPSPMVISFLLGVPWEDHEEFETPAHKLFVPELAEEATELGAYLERLI  
QKKEQPGGTPGGTGLLDDDLIRDHLRAGALSDELVHIAMAMLVAGTDTT  
NVISLGTALLDNPDQWAALRDNDELIPGAVEEILRYTSLIEAFARVAV  
SDIELNGAVIKEGEGILISSAGVNFDPALAPDPGRFDIRRPFRPSFSFSH  
GIHRCPGDNLARLELEIAFRSLVTRMPNLRATAKPIDQIPSNNDGTLQRL  
YELPVVW

>CYP105BL2 (2517940822) *Salinispora arenicola* CNY011

MSSHSAAAPDPETATPLHTLAPELAFFPQFERSAPFDPPQAYTELSGRCPV  
APVSMADGKPSWLITSFEGVRTTSLDPHFSSDMSHPGFNRTGKPVDDL  
KDTLGAMDGERHRYRRLTGELTVRRAKAMRPVITQITDEALDQLAAAG  
PGADLVKHVAFVVPSPRVACHLVGIPLSDYELFTGMAATLMDSTSSDDQFA  
ALQNMVSYFDTLVTDRHHDRDDLGHMVRRYLATGELTRDMLIRLAWTT  
MAAGQETTAHMIIGLGVAALLRHPDQLELLRREPHLLPGAVDELMRYLPLI  
QFGIPRVAMDDVEVDGQTVTAGEGVVALPPLANRDPVFERPDELDVRRN  
ARQHLTFGYGPHQCPAHALARLELEVYGRLLERFPTLRLADSDADLKVQ  
DKDIMYRVSELAVTW

>CYP105AB8 (2517940873) *Salinispora arenicola* CNY011

MTETASSRLTDTEFPVQRECPFAEPVEYEQIREQSSIAMVRLTGGGEAWW  
ISGHEQGRAVLADRRFSSDRKANFPFVSTDPAIRKRLHAQPLSLISMDG  
AEHTQARRALIGEFTVRRLAALRPRIQQIVDQCIDEMLTDDQHCADLVKT  
LSLPVPVSLVICELLGVADHDFQEHATLVRRTASEVRQHSIDELNA  
YLGALIDRKLASPDLLGRQIARQHRDGTFRSSMVSLAFLLLVAGHET  
TANMISLGVVGLLQHPEQLAMIKDDPKTPLAIEELLRFFTIVDSVTSRV  
ATEDVRFGDDTTINAGDGVVVSGLSADWDPTVFADPDRLDLERGARRHHLAF  
GFGPHQCLGQNLARLELQIVFDTLFRHRIPTLRLAAPLDKIPFKTDAAIYG  
ARELPVAW

>CYP154M21 (2517941061) *Salinispora arenicola* CNY011

MEKCPYVLDRAGSDIHKEASNLARGPVTLVELHGGYTAVSVTSYEVAKQ  
LLMDPRISKKTAKHWPEFRDGNVPQDWELYTWVAMDNMQTRDGKEHDLRL  
KLVAFAFTGRQAVKSRPIIEEIVNRLDDLETAPRGQAVDIKARYFYPLS  
TILVCDLLGIAEEDRDVILHGNVVNSKTTNTAESEANLHQWQTALGRV  
ETKRRDPGDDLTTVIIKAGEDEQTPLTDDEVIGSLHLLIGGGTETTANVL  
CHTVVDMLTHTPDQLAMVRSGAVSWESAWEEEVKRDGAVGSMFPFCATDDV  
EIGGVTTIAKGLVILINYAAAGRDPERYGDAAAEFDITRADKANLSFGYGR  
HRCLGPALATMEAMVALPALFDRFPNLALAVPPNELKPPQGTFFNGYAEV  
PLLLRS

>CYP154M13 (2517941062) *Salinispora arenicola* CNY011

MSTGRPVVLDPTGRDIHGEADHLRALGPATLVELPGGVLAWSINSYEVGK  
ALLSAPNVSKSARRHWPAYNGEIPPDWEMISWVAMDNISTTFGGDHRRRL  
RRLTAKAFGSRRAEQVRPMATHMVNTLLDRMADAADAGEVVDLKAAFAYP  
LPGMLVAELIGMSEEARVAAKVIDMMTATNITPEQAQGVLLGWRDAITD  
LIAALKRAQPGDDITSDLIAARDEDGSLLTEQELVDTIFAILGAGSETTIN  
FFDNAITQLLTHPEQLELVKSGQVSWDDVIEEVLRLSPLASLPMRFVE  
DIQLDGVTIHRGDPILINYAALGRDPALHGESAGVFDVTRQHKEHLSFGH



GAHYCLGAGIARMVAKTGLSALFERFPRMTLAVSATDLVPYPTFIMNGNR  
QLPVHLSGALTWREGEQSALGRA

>CYP105W2 (2517941075) *Salinispora arenicola* CNY011

MTGYQDRPTGDQPGAPVPSGSTDPGIGAFPLPRRCPPFSPPAEYARLRAEH  
PVVRLPMLGGDTAWVVSRHADVRQVLSDPRMSADRRRPFGFPKFAPTTEGQ  
RQASFANFRPPLNWLDPPEHAICRRQIVDEFVSRRVRQSRALVERVVDTH  
LDALTAAPGADLVSTFAYPVPSQVICEVLGVYPYGEHEFFERRSTLMFRR  
STPADERARCAREIRDFLDVVVTDKEHRPGDDVLSRLLYRQRAGGVDHE  
AVVSMAFVLLVAGHVTTSNMLALSVLALLTHPARLARLRAEPPERFPAAVE  
ELLRYFTVVEAATARTATAEVTIGGVTTAAGEGVVAVGQAANRDPRVFEH  
PDEFDPDRDARAHAFGHGRHICPGQHLARLEMEVALSRLFRRLPGLRLT  
MEVSDLPLKEDSNIFGLYALPVAW

>CYP248A2 (2517941083) *Salinispora arenicola* CNY011

VLADAVTAFDPTAVDVRRDPYPSYHWLLRHDPVHRGAHQVWYVSREFADVR  
AVLGDERFARTGIRRFWTDLVGPGLLSQIVGDIILFQDEPDHGRLRGVVG  
PAFSPSALRRLEPTIEATVNDLLRPARALGAMDVVADLAYPLALRAVLEL  
LGLPAGDANAVGRWSRAVGRTLDRGATAEDMRRGHAAIAEFADYVERALA  
ERREDGADLLALMLAAHRSQLMRNEIVSTVVTFFITGHETVASQLGNGL  
LSLLDHPEQLELVRRQPHLVPOAVEECLRFDPVQSNTRQLAADVELHGR  
RLRRDDVVVVLAGAANRDPGRYDRPDELDIRRDVPVSMFSGAGMRYCLGS  
YLARLQLRTALGAMVALPDLRLVCNPNELAYQPRMTMFRGLTRLPVAFTPA  
G

>CYP154M20 (2517941106) *Salinispora arenicola* CNY011

MERCPYVLDRAGRDLHGEAKALRARGPVTLVELHGGETAWSVTSYEIAKQ  
LLVDPRISKNTKETWPEFREGKVPQDWELYTWVAMDNMQTRDGEHDLRL  
KLVAQAFTTRQVAKVRPMIEDIVDRLLDDLEKVPAGEVVDIKGRIFYPLS  
TILVCDLLGIPEADRAEALHGTVVNARTTNSAESEANLHQWQSALSKLV  
ETKRREPGNDITTLIIKAREDEQAPLTDDEVIGSLHLLIGGETTETSNVL  
CNTLIDLLTHPDQMAMIRSGAVGWEEAWEVEVRKDGAVGSMPFRCANADI  
EIGGVTTIAKGDVLINIAAAGRDPERYGDTTAEFDITRADKTNLSFGYGR  
HRCLGPALATMEAMISLPALFERFPDLVLAVPRDELKPQGTFFVNGYAEV  
PMLLRS

>CYP107FJ2 (2517941113) *Salinispora arenicola* CNY011

MSETLSTSVLLADAAEQRAWRAKLRGAGPVHRITTQSGETGWLIVGHEEA  
RNALVDLRLQGRTATVGHGRMPEDLERALNSHMLNVGPPDHTRLRLRVS  
AAFTRRRIEQMRPRIQELTDELDDGLAGADEADLVAGLALPLPMRVLVDL  
FGIPAEDCADFNWTKVLTSAGAVDLDRLTAAAGEMVAYLRGLLDRKRQV  
PESDLSALVAVRDGADRLSDDELTSMVYLLLTAGYETTVNLIGNGLLNL  
LANPEQLVAFKADPDLLPQVVEEAMRFDSPVQIAVRHSTEPVEIAGQAIP  
SGALILVSLWANRDPDRFTEPEVFRVDRQDNPQLGFGYGFHHHCIGAPLA  
RMEGTVAIGTVIRRFAPALRLAHPAGSLTWRASMVMHGLTALPVHLR

>CYP211C1 (2517941320) *Salinispora arenicola* CNY011

VVDVEELLTRYSAQGRQDPFPVYADLHAQGPIAALPPEPERRRVAHAV  
GYDLVGAVLRDPEWSKAPSPGWTEQEILRTLQTSMMFINPPDHGRMRHVF  
AGTFTPRRLGALEPVVNRVADELLDRMADAGAGGLDFVAEFAYPLPARVM  
AEFIGIPETELDWYRERVDVIDAFLDVAGKTPQRLAAANAAGAELEAFYG

ELLARRRRTPGEDLITGLVEAVDAGGVELTEDELVSNLIVLFNASFVTTV  
YMLSNGLPVLLAHPEVAAALATDPVLTAGAVDEILRLQAPVHLLARAAPR  
DTVLGGVPIPIQGQNVLLLIAAANRDPAHFPDPDRFDPWRS GPPSLAFGLG  
LHYCLGAAVSRLEGR LALPRLLSRFPRLRIMEQPVYSGSLFLRGIDKLSV  
SPGEGSTRE

>CYP162P1 (2517941387) *Salinispora arenicola* CNY011

MGLPSEVDLADPDLYAEGDPDAEWAWLRAHRPVYRNPAGATAEFWALTRY  
RDALQVYRDPSTFSSERGMVLGVDPVAGDPAAGRMLVVTDPPRHPKLRI  
VSGIFVPRTMHRLEGRVRS LVDQLLHRVVDGAGRCDFVNDVAARLPVAII  
CELLGVPADQDWMYHLTSTAFGGGDPAGSAEVS AVERAEAYGDILLYYG  
ELAAERRRRPGDDLVTLLVHADLDGEPLDVEDVLVNCTNLIIGGNETTRH  
AASGGLLALAQRPELWRRLRETPTAVPTAVEEVLRWTTPGMHVLRATRD  
TEIGGVPIRAGERVVVWNAANRDEDVFADPQRFIDRSPNRHIAFGQGG  
HHCLGAALARLELTILFEEMAKQVTNVRLTG PVRVRVRS CVLRGIRALPVE  
LVT

>CYP1005A1 (2517941816) *Salinispora arenicola* CNY011

VSAVLFRSWTKTAGTRWPDVTRVADQSGTEHLVVTRHALVRQVLT DQATY  
RPDNAL EAVTPVPVAALRVLAGHRFRLPPTLANNGGASHPAIRALVADAL  
HPTKVAAQRPWLTGLVADRVATIRTTLD SGGPVDLYADLTADLPLLVLAR  
LVELPDAPVNAV KQFARAAL ELFWAPLDADRQLALADEVGRFHQV LREFA  
DTGGGLAAALRATGHSPDVLVGALFFLLVAGQETTSQFLTLL LHRLSGEP  
TIRAALRAGSSSVADVVEEGLRLEPPIV TWRRVA AVDSTLGGTTVAAGTS  
VLLW LARAGRDP AVVAAPDEF RPGQRGSRRLAFAGAGAHRC LGDQLARME  
AAVVVEQATPLLDGVT VVRPPWYPDNL TFRMPDAFV VRR

>CYP107EU1 (2517941892) *Salinispora arenicola* CNY011

VTIGQTL PDLVYSPEFTRDPYAIFARLREQAPVCRVTTHRGMSAWMVTRH  
ADVRALLADNRLAKDGNRIGELMPRHSTLTGAATGFPPGLTTNMVNSDPP  
DHTRLRHLVGREFTGHRVEGLRPRIEEIVDDLLDGVAACGDEADLAETLA  
RRLPIAVIGELLGVPEADRAEFFRWADTLYGGTASPEALGQAYNAIVDYL  
GRLCDAKRDVPADDLLTALVQVSADEDRLSREELVSMALLLLLVAGHETTS  
KQISNGVLALLLNPEQLKLLKAQPARTAGAVEELLRFEGPSLSASLRFTT  
EPVEVAGVVIPEGEFVLLSLASGNRDPEKFPDPDRLDITRYTQGNLAMGH  
GIHHCVGAALARLELEIVLSRLVARFPMQLAVEADDLEWLVNSFFRAPL  
HLPVSLRR

>CYP211B2 (2517942066) *Salinispora arenicola* CNY011

MDVSEAI AVLISPSGR LDPYPTYEQLRAHG PVSQTTAGLFVV TG YAEADM  
VLRDPRFVVLDDDLRDDVFPHWQDSPA IKS IARSMLRTNPPDHSRIRRLA  
AGAFTPRRVAAMREVVTAQADEL VDEMIRAGR DGARVDFMDMFAYPLPVA  
VICALLGVPAADRSRFRRWAGDLTGILEPEITPEELAGADAGADELRDYF  
TGLIEQRRRAPADDLTALVQAHDADGDRLS GEELLANLVVLLVAGFETT  
TNLLGNGLV VLLTRPEAAAAALRDEPD LAPGYVDELLRYDSPVQLTRTVR  
ESVSFAGTEL PAGSWLLVLLGAANRDP RRFDPARFDPGRAQS QPLSFGA  
GPHYCLGAGLARLEAQVAFPLLLRRLPELALAGRPSRRTRLT LRGYETLP  
ITVGAVTADRGT PAGVAPGTP

>CYP105CH1 (2517942153) *Salinispora arenicola* CNY011

VSSLPLPTYPKLRDPADPLLPAPAEYLAIQSEKPIAKVLLPSGRPTWLITG

HALARQVLTEPCVSVDRRHFNFPYPVNPDAVVAQVARWTYILLGDDPPL  
HTERRRLLISEFTVRQAQAMRPRIQQLVDFHLEQLIAAGPGADFSKHFAM  
KVPSAVICEMLGVPFADHDYFQERTALQLRRDVPVAAQKQAIDELLAYFE  
QLIQEKSSHPGDDVLSRLIVSNRETEAFDHEALVALGLLLLLVGGHETTAN  
TLTLATATMLERPEIAEQLRTPSLMPSAVEEFLRYFSVAVAVSRIATAD  
LQVGGQLVRAGESMLLVNLTARDGTVFPEPHRLDIRRNARNHLAFSHGI  
HQCMGQNLARVEMQIALDTVLRRLPGLHLVTPFEELPFKYRHLVWGIEEL  
RVAW

>CYP107AX14P (2517942162) *Salinispora arenicola* CNY011

VTSPPHVAFGHLLLRDPHGQYNALRGQAPVHHIRTPDGAPAWLVMRYHDV  
QAALTDLRLSVDKRFSDDTGEHGSSLPPELDAHLLNRDPPDHTRLRRLAA  
AAFTPRRVADQAPAVATIVDALLDGIADQDQAEILGALASPLPLQVMHEL  
LGLPTQTSVDFRNWTNTLLSADANQPAQSRSAMATMRRFLMGQLARKRAQ  
PGDDLVTGLLAARDDDDRFTDDELLAMVFLLMFAGYDNTAALIGNVTHAL  
LTDAGLHDAVRAGSVDDLSDVDEVLRWNPSFPLAVRRFAREFVTPSRQAI  
ASGSAWPARTATPHSSPNPTN

>CYP105J3 (2517942370) *Salinispora arenicola* CNY011

MTDSVAFFPQGRVCPHQAPAGYRPLAVQRPLAQVTLYDGRRVWAVTTRDLA  
RRLLVDPRISSDRTNPAWPAIVPIVAAAVNDAQQKVLKIATALVGTGPE  
HKAQRKMLIPSFTRFRMNALRPMIQEIVDQQLDEMIKSGAPTDLIPAFAS  
AVPVTVLYRLMGIPDDDHGIFEKLSHQLLAGPNANEAYDQLMGYMSRLIA  
ERRRNPEGVLDLLAQHGANDDADHDELVSTLVVQVAGNHGTTGSMIAL  
GLFALLQHPEQLAELRADPSLMPTAVDELLRFLSVPDAVTRLAADDIEVE  
GTVIRKGDGVFFITSLINRDTDVHDAPNSLGWHHASAADHLTFGFGAHQC  
LGQSLARITMEIALGALIDRLPSLRLAVPAEEVPFLPAASLQVIAELPIT  
W

>CYP107AY2 (2517942663) *Salinispora arenicola* CNY011

MTAEPTPIPRSGARLGQEYDQLRKTDGVHQVLLPDASLAWLVTNPEVAAR  
ALADPRLALNRRNSRGGWSGFALPPALDANLLNLDAPDHTRLRRLVGPAPF  
SPQRVAALRPGIRRAAEHLLDTLVATSGPTDLVTGYCNPLSVQVIADLMG  
VPEAGRTNLRATDTMLTSYPPDRDAIRRAVTELHGYYVDLIDLKQQQPG  
DDLLSALVTIEQDGDRLSRDELTSLAFLILFAGYENTANLIASAVLWLLD  
HGGLNVVPISEAIEATLRHEPPAPVAIRRFPTEDIIIGGV TIPAGDTVLL  
SIAAATRGADGNAARLAFGNPHYCLGAALARVEAEALTVLARRLPGLT  
LAVPPSQVRWRPTFRTHGPAELLVGW

>CYP244A7 (2517942816) *Salinispora arenicola* CNY011

VRVTSSNLAEAPEVTMPVDLRPTDCLPELLAAARVAPVVRTRYLDQHAW  
IVCDRELVKQALTHPKLGKDITLAPDWMRKPGQMTAMPPEYARMMITS  
DGENHSRIRRLHAPVLSRNTERWGKRVATLADELLDELDSGDNAEVNVV  
TDYTHKVPLAFTSEMLGLPPGAERRLHDITEVMLYSADYALRQQAEEELF  
EAVQDWVRNPAGLYDGVITGLLASSDEEDVTVTEGEVIVWTLISLVINGYE  
TTGSLISAALYEALRRPVRERPHTDEEDIAAWIEEALRVQPPVPHTTWRFA  
LEDLSLGGYLIIPKGAQVQSIAAANRDPNEDTDGFD AERRGRGHL SFGRG  
VHYCIGAPLARLQAQIALHGFLQRFPRARLSADTAPQWESEWMIRMSVL  
PALLA

>CYP1198B1 (2517942937) *Salinispora arenicola* CNY011

MSGELTDQRTAPGAGGNPLRSLMDHGIRANPYPLFGELREAGPTAVEDGS  
VVLFGHEYEHCSQILRHRDMGSDTSEAPSIKGFVVDDAERAGSSIFFMDQP  
GHGRQRKLVSQSFTPRIVKSFGPQITHIVDGLFEDFRDKGELDVVTDLAY  
PVSIGIICDLFGIPDDERDMLKEWSDDLALSTELPTLGAAIGVLNVFTRD  
EINRFGSVAMAAHAYFADLIHRRRKPNPGDDLVSLLATESNGERLTRFEV  
TSVLATLFVAAHESTTNLISGGILALLRNQDQMAVLRENPGELITNVVDES  
LRYDPPVHLAARMARATTIGGYDLDPGTIVVVLMAAGNRDPAYENPDV  
FDVNRKIRNVSLAFGAGAHFCIGSGLAKLEAEIAISAFQRLKHPEVDES  
SLEYRRHIVVRGLEHMKVSFQP

>CYP105BL2 (2516011863) *Salinispora arenicola* CNX508

MSSHSAAPDPETATPLHTLAPELTFPQFERSTPFDPQAYTELSGRCPV  
APVSMADGKPSWLITSFEGVRTTSLSDPRFSSDMSHPGFPNRTGKPVDDL  
KDTLGAMDGERHRYRRLMTGELTVRRAKAMRPVITQITDEALDQLAAAG  
PGADLVKHVAFVVPVSRVACHLVGIPFSDYERFTGMAATLMDSTSSADQFA  
ALQNMVSYFDTLVTDREHHRDDLLGHMVRRYLASGELTRDMLIRLAWTT  
MAAGQETTAHMIIGLVAALLRHPDQLELLRREPHLLPGAVDELMRYLPLI  
QFGIPRVAMDDVEVDGQTVTAGEGVVTLPPPLANRDPVFERPDELDVRRN  
ARQHLTFGYGPHQCPAHALARLELEVYGRLLERFPTLRLADSDADLKVQ  
DKDIMYRVSELAVTW

>CYP125A41 (2516012414) *Salinispora arenicola* CNX508

MTEPRIPAGFDFTDPEVLAHRVPREEFAELRRTAPVWWNAQPRGSAGFDD  
DGYWVVTRYADVMTVSRSDTYSTRENTAIARLRPDTTREDIEMQRVIML  
NVDPPEHTKLRAIVSRGFTPRAINALRGSLAERAHIVRDAAVRGVGDV  
TDVACELPLQAI AELIGVPQHHRKVFWDWSNQLIGYDDPAYGTDPLTASA  
ELLAYAMEMAERQRSPSDDLVTCLVNAQIDGEHLTTDEFGFFVMLLAVA  
GNETTRNAITHGMVAFLDNPEQWELFKAERP KSAVEEII RWATPVNVFQR  
TALVDTVLGGQAI SAGQRVALFYGSANFDEAVFEDPERFDITRSPNPHLG  
FGGSGAHFCLGANLARLEIELIFNSIADHLPDIRKVAAPQRLRSGWINGI  
RQMPVRYR

>CYP244A4 (2516012801) *Salinispora arenicola* CNX508

MSTTTNTELTEAPETNMPVDPGLFDCMPDLIAAARVAPVVRIPYLGRHAW  
VVCDELVKQALTHPKMGKDIALVPEWMRQPGLMVTAQPDPEYARAMIMS  
DGENHARIRRIHAPVLSRPNTERWGDVADKVEGFLDELSQAGSGGSTEV  
NVVTNYTHKIPLAFISEMLGLPPEAEHRLRGITDIMLYSSDYAARREAIG  
GLFGAVEDWVRNPADLRDGVITGLLAASDGPDAAVTEGEVIVWTLGMIIT  
GYETTGLISTSLYEAIRPPHERPKTDEDITAWIEETLRVHPPFPHTW  
RFPLEDIELGGYLIPKGAPVQVSIAAANRKPGEAGDSFDAERRGHGHL SF  
GLGMHYCIGAPLVRLEAQIAVRGFLRRFPQARLSAETAVQWESEWMIRRM  
SVLPAVLS

>CYP245A7 (2516012805) *Salinispora arenicola* CNX508

MPSATLPRFALTGWSRENIVNPYPVYQRYREVASVHRGEPGGDAPDTFYV  
FSYDEVVQVLSSNCFGRGRSLDAAKASVPVPAEQKALRAIVENWLVFMDP  
PRHTELRSLLNRSFSPRIVTEL RPRIARIAQELLSRLGQQVDVDLVESFA  
APLPILVISELLGIPEERRAWLRANALALQEASSSRAGRDVDGYARADVA  
AQEFTEYFREQVRLRRGRAGGDLITILANAQQRGAPVSLDAIVGTCVHLL  
TAGHETTTNSLAKAVLALREHPAVLDELRGADGLTTDAVEEFFLYDPPVQ  
AVTRWAHQDATLGGCDIPGRSRVVALLG SANRDPARFPSPDVL D VRRPAD  
RHLSFGLGIHYCLGATLARAEEIIGLQALLDGVP T L GYGTQHVDYADDLV  
FHGPSRLVLVNLGERCK

>CYP154M5 (2516013607) *Salinispora arenicola* CNX508

VEQSCPYKLDVTGRDVAEAGEAIRARGPVAQVELPGGVQGSVGTGYQAAR  
QVLADPRFAKDPKKWPAYTSGAIPPNWPLIGWLLMDNMTTNDGADHQRLR  
KLVSHGFTPRQVERTRPLIVKIVNDLLDGLSSAGPDEVVDLKGRFATPLP  
ARVICDMFGVPEALRASVLRGAQVNVNTSSISGEEAEANVEQWHRELLELV  
EAKREKPEDMASLLIAAKEEDGSTLTQEEVVGTLHLMLGAGSETLMNAL  
SYAVLGMLSNPGQYEMVRNGTSSWDDVIEETLRAQAPVAQLPLRYATEDV  
AVGGAVIKAGDPVLMGFTAIGRDPVHGETAGDYDITREDKTHLSFGHGV  
HFCLGAPLARLELKIALPALFERFPNMTLAVRPAQLEPQGTIFMNGHREL  
PVRLGQPATVLA

>CYP105CT1 (2516013624) *Salinispora arenicola* CNX508

MNSPNHMPADRSLTAPTSGCPMALSRGRVGLDVADEIGELRDGGRLGRIT  
TAFGQEATLITRYDEVRAQMADSVVFNVAGVPSPPALVDGGFDTESVRRR  
RTVGNLIMLDPPEHTRLRRMVAAWFTTRRVERLRPRVVEIIDAALDEMER  
SGPPVDLVAMFAKTVPITVICELIGVPEELRERYRRRAERAVSASAVSTP  
LDELRLREAGWVSRELIEYHRENPSDDIIGMLLREHGTDSDHDDGITDDE  
LVGLANALLIAGHETTTQMLSMGTLALLRHPDQLALLRDDPSIVAGAVEE  
LLRYVGVLHGGFVRVATRDTRLGGHRIHAGELVVPALTAANRDPRLITDG  
DRLDITRPPTSHVAFGHGVHFCIGAPLARMELREAFPALLRRFPGLRLAV  
PDSELEFTQGTTVYSLRGLPVTW

>CYP1051A1 (2516013722) *Salinispora arenicola* CNX508

MATDAAITRARTVPAWKALPAAVRGAHRALVDVGNWSDGDVVRVSLGVSR  
PYLVTNPAHVQEVLEHRAAIYPRGDDTTLWRSVRKLVGDGILAEGDAWAA  
SRRVLAPMFRPARINAMVDTMADAIAAGVDDLHGAATAGTPIDVGRELSR  
IVCSAIMRVFFADRITVRDALRIMKAQETIVTAMAPRILAPLVPWWIPMP  
GDRRFRAAVRSIDILLPVLQRQAQRQPDDGDDLLSRLVRARADDGRTLSE  
KMRDDLVSMVAVTTTETSTVVLTWLWPLLANHPDVANRLYDEIDRVVGGG  
PVRGDHLAELTYTRMVLDELLRLYPAGWILPRRAATTDVLGGVRIDKGAT  
VILSPYVTQRMATAWWGPTAEAFDPERFAAGREAADGRHRYAYYPFGVGMH  
RCLGEHLFNLEAILIVATLLSRFRFALTDTSMPGVKVAASTRPARTVEMV  
LKPVAPVPAR

>CYP105G5 (2516013755) *Salinispora arenicola* CNX508

LTITETTETPPADDSLRAPLPRQFMQRDDPSKLPALAAALAEQSPVGRSTL  
PDGDPFWMVSGYDEARAVLSDRPFSSDRFRYHPRFKKLSGELGERLRNDK  
ARAGSFINDPPEHTRYRKLTTGQFTVRRMRQLTVRIEQIVTEQVDVMLA  
EGNSADLVSAFAVPVPSLMICELLGVRYEDRTEFQRRRAAGLLQTDLPKQ  
AVENLEAQRAFMQRLVTDKRRTPADDMISGLVHHAGAEPPLTDDELVGIA  
TLLLFAGLDTTASMLGLGMFMLLQRPEQMAVLRDDPSRIGDAVEELLRYL  
TVVSTGLFRFAKEDVVLGDEHIPAGSTVVVSLMAANRDGRHWPEPETLDV  
TRVRSSHLAFGHGVHQCLGQQRLARIELTVGITELLRRLPNVRLAVPPADV  
PLRNDMITYGVHRLPILWDTF

>CYP107Q4 (2516013756) *Salinispora arenicola* CNX508

MTTTAETSATIDLFSPEVVADPFGWYARLREETGPTTGTLNIGTMMGGP  
EMWLVTTRYEDVRQVLTDPRFLTNPADSPLEDIRAGVFKRLDFPPDLIPW  
MANLLNVSDGEDHTRLRKLVSALTAKHRIGKLRPRVEKITADLLDKLAED  
GKDGSPVDLVEEYCYPLPVTVICELVGIDEPRPHWRWAGDSMATMNGER  
IPTTLVKCIELARELIAKRAEPQDDLVTALVQAQAEQNRVSDDEIIGI

LFSLVTAGHQTTTYLIGNSVILLLENPDQLARLKENPSMWPQAVRELQRL  
GPIQFAQPRFPSEDIELGGVTIPRGAPVAPLLLAANTDPRRFPDPNKLII  
DRLAVGSEGLHGFKGKIHRCCLGQHLAYQEAEEVALQGLFTRFPDLSLAVPR  
EEIPWILRPGFTRTRTLPLKLV

>CYP105CP2 (2516014123) *Salinispora arenicola* CNX508

MTKSMPVQDLPAFFIPRECPYRPSAQHVSLRSGGPMKVRLYNGRTAWLV  
TDSAHARAVLSDYRRVSIKPYHGNYPLLNEEFKVVDSGYADVLFGVDPP  
EHTRQRMIMPSFTLRRRTAVLRPDVQRIVDDKLDMMRHGAPGDLVTEFA  
QPVPMSMVSFLLGVPWEDHEEFETPAHKLFVPELAEEATTELGAYLERLI  
QKKEQPGGTGGTGLLDDLIIRDHLRAGALSDELVHIAMAMLVAGTDTT  
NVISLGTALLLDNPQWAAALRDDPDELIPGAVEEILRYTSLIEAFARVAV  
SDIELNGAVIKEGEGILISSAGVNFDPALAPDPGRFDIRPPRPSFSFSH  
GIHRCPGDNLARLELEIAFRSLVTRMPNLRATAKPIDQIPSNNDGTLQRL  
YELPVVW

>CYP105CN1 (2516014125) *Salinispora arenicola* CNX508

MAAPAPQATQSTTPHPPSYPLPRECPYRPSAGTARLRDAGPVSTVRLYDG  
RTAWLVGTAAEARALLADSRVSNRADFPNYPVMDERHLSMRATREMAREE  
EGGFAAALFGMDPPEHTRQRLPRFTVRQVAARRPAIQRIVDEHLDAM  
EANGSPADLVSAFATPVPTMVVCTHLGVPHYQDRTRFEPVAGLFEPRAD  
AAMAELTAYLHQLIETKQSEPGDGVIDHLIANHLRPGAIDRAELVAIASA  
ILVAGTVTTSSAIALGTLALLTAPGQYAALVDNPDLPVPGAVNEILRYLSL  
VEQLARVATEDIEIGGKLIRAGDGIIVSFAAGNLDPNVTTHPDRLDVALP  
PTNHAFSHGIIHCIGQNLALLELDIAFRALVSRFPTLRLAVPAEQLPY  
FAGDVPRLACLPTVW

>CYP107FS2 (2516014126) *Salinispora arenicola* CNX508

MPVPQGEQNLTTTEVFADPKALFATLGSRQPLHRISLPDGMFAVLVTGNRE  
ARQALSDPRLVRSITAAAPELHKYHPLASDDYALSRHMLFADPPDHGRMR  
KLVSTAFTRRRVEQMRPRIQQITDDLIDVIAAKGEADLVETLALPLPIAV  
ISEMLGVPPFADRSEFERHAEVLGTINASSGFDALIAAGRWFEYLAELVQ  
QRRREPQDDLISGMLAAQDKGDRLTDVELRSNALLLSAGFETTUNLVAN  
GLLALLRHPEAMAALRSEPNLMTTAVDELRLRYDSPVSCVTYHFAQEPVEI  
GGFEIRSGEHVVIAAAANHDPTVFADPSRLDLRREGSGQILSFSHGIHF  
CLGAPLARLEGEIAFGTVLRLRAGLTLAVPTDSLWVKASFVLHRLRLPV  
TFTPDRAFPNIDSVHTV

>CYP208A12 (2516014158) *Salinispora arenicola* CNX508

MTLDTITPRVPLGPRTAALRMLLVMKRDRLGMLTSAAARYGDASRLPVG  
HKALWFFNHPRYAKHVLADNSANYHKGIGLVHARRALGDGLLTSEGLWR  
KQRKVIQPAFQSRRIAQQAGMIAEEAFALVERLRARAGAGPVELTAEITG  
LTLGVLGRSLLDADLAGFDSIGDSFATVQDQAMFELETNAVPMWIPLPR  
QIRFRARRRKLQAVVDTLVDGRAGNLADRVDVLSRLILSARGEADPRVGR  
ERLRDELVTLLLAGHETTASTLGWTLSLIDRHGVPWERLHAEAVEVLGDR  
LPEYDDLRLRLRYTVMVVEEAMRLFPVWLLPRRALAPDTIGEYRVANAD  
VVISPYTLHRHPEFWPNPERFDPERFAPGQAADRPYAYLPFGAGPRFCV  
GNNLGMMEAVFVIALLCRHLRLTGVPGYRLVPEPMLSLRIRGGPLVVRP  
VS

>CYP1005A1 (2516014320) *Salinispora arenicola* CNX508

VSAVLFERSWTKTAGTRWPDVTRVADQSGTEHLVVTRHALVRQVLTQATY  
RPDNAMEAVTPIPVAAALRVLAGHRFRLPPTLANNGGVSHPAIRALVADAL  
HPTKVAAQRPWLTGLVADRVASIRTTLDSSGGPVDLYADLTADLPLLVLAR  
LVELPDAPVNAVVKQFARAALFLWAPLDADRQLALADEVGRFHQVLRFEFA  
DTGGGLAAALRATGHSPDVLVGALFFLLVAGQETTSQFLTLLHRLSGEP  
TIRAALRAGSISVADVVEEGLRLEPPIVTVRRVAAVDSTLGGTTVAAGTS  
VLLWLARAGRDPVVAAPDEFRRPGQRGSRRLAFGAGAHRCCLGDQLARME  
AAVVVEQATPLLDGVTVVRPPWYPDNLTFRMPDAFVVRR

>CYP211C1 (2516014419) *Salinispora arenicola* CNX508

VVDVEELLTRLYSAQGRQDPFPVYADLHAQGPIAALPPEPERRRVAAVAV  
GYDLVGAVLRDPEWSKAPPPGWTEQEILRTLQTSMMFINPPDHGRMRHVF  
AGTFTPRRLGALEPVVNRVADELDRMADAGAGGLDFVAEFAYPLPARVM  
AEFIGIPETELDWYRERVDVIDAFLDVAGKTPQRLAAANAAGAELEAFYG  
ELLARRRRTPGEDLISGLVEAVDAGGVELTEDELVSNLIVLFNASFVTTV  
YMLSNGLPVLLAHPEVAAAALATDPVLTAGAVDEILRLQAPVHLLARAAPR  
DTVLGGVPIPIQGQNVLLLIAAANRDPAHFPDPDRFDPWRS GPPLAFGLG  
LHYCLGAAVSRLEGRALPRLLSRFPRLRIMEQPVYSGSLFLRGIDKLSV  
SPGEGSTRE

>CYP107AY2 (2516014671) *Salinispora arenicola* CNX508

MTAEPTPIPRSGARLGQEYDQLRKTGDVHQVLLPDASLAWLVTNPEVAAR  
ALADPRLALNRRNSRGGWSGFALPPALDANLLNLDAPDHTRLRRLVGPAP  
SPQRVAALRPGIRRAAEHLLDTLVATSGPTDLVTGYCNPLSVRVIADLMG  
VPEAGRNTLRAWTDMLTSYPPDRDAIRQAVTELHGYYVDLIDIKQQQPG  
DDLLSALVTIEQDGDRLSRDELTSLAFLILFAGYENTANLIASAVLWLLD  
HGGLNVVPISEAIEATLRHEPPAPVAIRRFPTEDIIIGGLTIPAGDTVLL  
SVAAATRGADGNAARLAFNGPHYCLGAALARVEAEEALTVLARRLPGLT  
LAVPPSQVRWRPTFRTHGPAELLVGW

>CYP105AB8 (2516014717) *Salinispora arenicola* CNX508

MTETASSRLTDTEFPVQRECPFAEPVEYEQIREQSSIAMVRLTGGGEAWW  
ISGHEQGRAVLADRRFSSDRKANFPFVSTDPAIRKRLHAQPLSLISMDG  
AEHTQARRALIGEFTVRRLAALRPRIQQIVDQCIDEMLTDDQHCADLVKA  
LSLPVPSLVICELLGVPYADHDFEQEHTATLVRRNTASEVRQHSIDELNA  
YLGALIDRKLASPDDDLGRQIARQHRDGTFRSSMVSLAFLLLVAGHET  
TANMISLGVVGLLQHPEQLAMIKNDPDKTPLAIEELLRFFTIVDSVTSRV  
ATEDVRFGDTTINAGDGVVVSGLSADWDPTVFADPDRLDLERGARRHHLAF  
GFGPHQCLGQNLARLELQIVFDTLFRHRIPTLRLAAPLDKIPFKTDAAIYG  
ARELPVAW

>CYP105W2 (2516015234) *Salinispora arenicola* CNX508

MTGYQDRPTGDQPGAPVPSGSTDPGIGAFPLPRRCPFSPPAEYARLRAEH  
PVVRLPMLGGDTAWVVSADVRQVLS DPRMSADRRRP GPFKFAPTTEGQ  
RQASFANFRPPLNWLDPPEHAICRRQIVDEFVRRVRQSRALVERVVDTH  
LDALTAAPGADLVSTFAYPVPSQVICEVLGVYPYGEHEFFERRSTLMFRR  
STPADERARCAIREDFLDVVVTDKERRPGDDVLSRLLYRQRSAGGMDHE  
AVVSMAFVLLVAGHVTTSNMLALSVLALLTHPARLARLRAEPPERFPAAVE  
ELLRYFTVVEAATARTTTAEVTIGGVTTIAAGEGVVALGQAANRDP RVFEH  
PDEFDPDRDARAHAFGHGRHICPGQHLARLEMEVALSRLFRRLPGLRLT  
MEVSDLPLKEDSNIFGLYALPVAW

>CYP248A2 (2516015241) *Salinispora arenicola* CNX508

VLADAVTAFDPTAVDVRRDPYPSYHWLLRHDPVHRGAHQVWYVSRFADVR  
AVLGDERFARTGIRRFWTDLVGPGLLSQIVGDIILFQDEPDHGRLRGVVG  
PAFSPSALRRLEPTIEATVNDLLRPARALGAMDVVADLAYPLALRAVLEL  
LGLPAGDANAVGRWSRAVGRTLDRGATAEDMRRGHAAIAEFADYVERALA  
ERREDGADLLALMLAAHRSQMSRNEIVSTVVTFIFTGHETVASQLGNGL  
LSLLDHPEQLELVRRQPHLVFPQAVEECLRFDPFAVQSNTRQLAADVELHGR  
RLRRDDVVVVLAGAANRDPGRYDRPDELDIRRDVPVPSMSFGAGMRYCLGS  
YLARLQLRTALGAMVALPDLRVVCSPNELAYQPRTMFRGLTRLPVAFTPA  
G

>CYP211B2 (2516015494) *Salinispora arenicola* CNX508

MDVSEAI AVLISPSGRLDPYPTYEQ LRAHG PVSRTTAGL FVVTGYAEADM  
VLRDPRFVVLDDDLRDDVFPHWQDSPAIKSIARSMLRTNPPDHSRIRRLA  
AGAFTPRRVAAMREVVTQADELVDDEMIRAGRDGARVDFMDMFAYPLPVA  
VICALLGVPAADRSRFRRWAGDLTGILEPEITPEDLAGADAGADELRDYF  
TGLIEQRRRAPADDLTALVQAHDADGDRLSGEELLANLVVLLVAGFETT  
TNLLGNGLVVLLTRPEAAAAALRDEPD LAPGYVDELLRYDSPVQLTTRTVR  
ESVSFAGTELPA GSWLLVLLGAANRDP RRFDPARFDPWRAQS QPLSFGA  
GPHYCLGAGLARLEAQVAFPLLLRRLPELALAGRPSRRTRLTLRGYETLP  
ITVGAVTADRGTPAGVAPGTP

>CYP166A4 (2516016425) *Salinispora arenicola* CNX508

MTDAISFELPWARTDKFDPPAVFDALREQRPLARMRYPDGHVGWIVSSYE  
LVREVLGDPRFSHSCAVGHFPVTHQGQVIPTHPQIPGMFIHMDPPEHTRY  
RRLLTGEFTVRRTSRLTGHEGVATEQIEVMREHGAPADLVATFARPLVL  
RVLSGLVGLPYGERDRYLHAVTLLHDAEADPAEAAAAAYEQAGAYFDEVIE  
RRRRQPEDDLISTLVGGGELTGEELRNIVTLLLFAGYETTESALAVGMFA  
LLHHEDQLARLRADPTKIDAAIEELLRYLTVNQYHTYRTASEDIELHGEV  
INKGDSVTVSLPAANRDPARFACPAELDIDRETSGHVAFGFGI HQCLGQN  
LARVELRAGLSALLRAFPNRLRLAVPADEVPLRLQGSVFAVKNLPVCW

>CYP105BL2 (2517989361) *Salinispora arenicola* CNY237

MSSHSAAAPDPETATPLHTLAPELTFPQFERSTPFDPQAYTELSGRCPV  
APVSMADGKPSWLITSFEGVRTTSLDPRFSSDMSHPGFNRTGKPVDDL  
KDTLGAMDGERHRYRRLMTGELTVRRAKAMRPVITQITDEALDQLAAAG  
PGADLVKKHVAFFVPSRVACHLVGIPLSDYELFTGMAATLMDSTSSDDQFA  
ALQNMVSYFDTLVTDREHHDRDDLGHMVRRYLATGELTRDMLIRLAWTT  
MAAGQETTAMMIGLVGAALLRHPDQLELLRREPHLLPGAVDELMRYLPLI  
QFGIPRVAMDDVEVDGQTVTAGEGVVALPPLANRDPVAFERPDDELVRRN  
ARQHLTFGYGPHQCPAHALARLELEVYGRLLERFPTLRLADSDADLKVQ  
DKDIMYRVSELAVTW

>CYP211C1 (2517989908) *Salinispora arenicola* CNY237

VVDVEELLTRLYSAQGRQDPFPVYADLHAQGPIAALPPEPERRRVA AVAV  
GYDLVGAVLRDPEWSKAPPPGWTEQEILRTLQTSMMFINPPDHGRMRHV  
AGTFTPRRLGALEPVVNRVADELDRMADAGAGGLDFVAEFAYPLPARVM  
AEFIGIPATELDWYRERVVIDAFLDVAGKTPQRLAAANAAGAE LRAFYG  
ELLARRRRTPGEDLISGLVEAVDAGGVELTEDELVSNLIVLFNASFVTTV  
YMLSNGLPVLLAHPEVAAAALATDPVLTAGAVDEILRLQAPVHLLARAAPR  
DTVLGGVPI PQGQNVLLLLIAAANRDP AHFPDPDRFDPWRS GPPSLAFGLG  
LHYCLGAAVSRL EGRALPRLLSRFPRLRIMEQPVYSGSLFLRGIDKLSV  
SPGEGSTRE



>CYP125A41 (2517990056) *Salinispora arenicola* CNY237

MTEPRIPAGFDFTDPEVLAHVRVPREEFAELRRTAPVWWNAQPRGSAGFDD  
DGYWVVTRYADVMTVSRSDTYSTRENTAIARLRPDTTREDIEMQRVIML  
NVDPPHEHTKLRAIVSRGFTPRAINALRGSLAERAHIVRDAAVRGVGVDFV  
SDVACELPLQAI AELIGVPQHRRKVFWDWSNQLIGYDDPAYGTDPLTASA  
ELLAYAMEMAERQSRSPSDDLVTCLVNAQIDGHELTDEFGFFVMLLAVA  
GNETTRNAITHGMVAFLDNPEQWELFKAERP KSAVEEII RWATPVNVFQR  
TALVDTV LGGQAI SAGQRVALFYGSANFDEAVFEDPERFDITRSPNPHLG  
FGGSGAHFCLGANLARLEIELIFNSIADHL PDIRKVAAPQRLRSGWINGI  
RQMPVRYR

>CYP105J3 (2517990232) *Salinispora arenicola* CNY237

MTDSVAFFPQGRVCPHQ PAPGYRPLAVQRPLAQVTLYDGRRVWAVTTRDLA  
RRLLVDPRISSDRNTNPAWPAIVPIVAAVND AQQKVLKIATALVGTGPE  
HKAQRKMLIPSF TFRMNALRPMIQEIVDQQ LDEMIKSGAPTDLIPAFAS  
AVPVTVLYRLMGIPDDDHGIF EKLSHQLLAGPNANEAYDQLMGYMSRLIA  
ERRRNPGEGLVDDLQAQHGANDDADHDELVSTLVVQVAGNHGTTGSMIAL  
GLFALLQHPEQLAELRADPSLMPTAVDELLRFLSVPDAVTRLAADDIEVE  
GTIIRKGDGVFFITSLINRDTDVHDAPNSLGWHHASAADHLTFGFGAHQC  
LGQSLARITMEIALGALIDRLPSLRLAVPAEEVPFLPAASLQVIAELPIT  
W

>CYP245A7 (2517990711) *Salinispora arenicola* CNY237

MPSATLPRFALTGWSRENIVNPYPVYQRYREVASVHRGEPGGDAPDTFYV  
FSYDEVVQVLSSNCFGRGRSLDAAKASVPVPAEQKALRAIVENNLVFM DP  
PRHTELRSLLNRSFSPRIVTEL RPRIARIAQELL SRLGQQVDVDLVESFA  
APLPILVISELLGIPEERRAWLRANALALQEASSSRAGRDVDGYARAEVA  
AQEFTEYFREQVRLRRGRAGGDLITILANAQQRGAPVSLDAIVGTCVHLL  
TAGHETTTNSLAKAVLALREHPAVLDEL RGAEGLTDDAVEEFLRYDPPVQ  
AVTRWAHQD TTLGGCDIPRGSRVVALLGSANRDPARFPSPDVL DVRRPAD  
RHLSFGLGIHYCLGATLARAELEIGLQALLDGVPTLGYGTQHVDYADDLV  
FHGPSRLVLVNLGERCK

>CYP244A4 (2517990715) *Salinispora arenicola* CNY237

MSTTTNTELTEAPETNMPVDPLFDCMPDLIAAARVAPVVRIPYLGRHAW  
VVCDELVKQAL THPKMGKDIALVPEWMRQPGLMVTAQPDPEYARAMIMS  
DGENHARIRRIHAPVLS PRNTERWGERVADKVEGFLDELSQAGSGGSAEV  
NVVTNYTHKIPLAFISEMLGLPPEAEHRLRGITDIMLYSSDYAARREAIG  
GLFGAVEDWVRNPADLRDGVITGLLAASDGPDAAVTEGEVIVWTLGMIIT  
GYETTGS LISTSLEYAIRPPHERPKTDEDITAWIEETLRVHPPFPHTW  
RFPLEDIELGGYLIPKGAPVQVSIAAANRKPGE GADSFDAERRGHGHL SF  
GLGMHYCIGAPLVRLEAQIAVRGFLRRFPQARLSAETA VQWESEWMIRRM  
SVLPAVLS

>CYP105CP2 (2517990935) *Salinispora arenicola* CNY237

MTKSMPVQDLPAFPPIPREC PYRPSAQHVSLRSGGPMKVRLYNGRTAWLV  
TDSAHARAVLS DYRRVSIKPYHGNYP LLNEEF EKVVDSGYADVLFVDP  
EHTRQRQMIMPSFTLRRTAVLRPD IQRIVDDKLDEM MRHGAPGDLVTEFA  
QPVPMSMVSFLLGV PWEDHEEFETPAHKL FVPELAEEATTEL GAYLERLI  
QKKEQPGGTPGGTGLLDDLIRDHLRAGALS RDELVHIAMAMLVAGTDTT  
NVISLGT LALLDNPDQWAALRDNPD ELIPGAVEEILRYTSLIEAFARVAV  
SDIELNGAVIKEGEGILISSAGVNFDPALAPDPGRFDIRPPRPSFSFSH

GIHRCPGDNLARLELEIAFRSLVTRMPNLRRTAKPIDQIPSNNDGTLQRL  
YELPVVW

>CYP105CN1 (2517990937) *Salinispora arenicola* CNY237

MAAPAPQATQSTTPHPPSYPLPRECPYRPSAGTARLRDAGPVSTVRLYDG  
RTAWLVTGAAEARALLADSRVSNRADFPNYPVMDERHLSMRATREMAREE  
EGGFAAALFGMDPPEHTRQRLPRFTVRQVAARRPAIQIRIVDEHLDAM  
EANGSPADLVSAFATPVPTMVVCTHLGVPPYQDRTRFEPVAVAGLFEPDRAD  
AAMAELTAYLHQLIETKQSEPGDGVIDHLIANHLRPGAIDRAELVAIASA  
ILVAGTVTTSSAIALGTLALLTAPGQYAALVDNPDLPVGAVNEILRYLSL  
VEQLARVATEDIEIGGKLIRAGDGIIVSFAAGNLDPNVTTHPDRLDVALP  
PTNHLAFSHGIHHCIGQNLALLELDIAFRALVSRFPTLRLAVPAEQLPY  
FAGDVPRLACLPVTW

>CYP107FS2 (2517990938) *Salinispora arenicola* CNY237

MPVPQGEQNLTTTEVFADPKALFATLGSRQPLHRISLPDGMFAVLVTGNRE  
ARQALSDPRLVRSITAAAPELHKYHPLASDDYALSRHMLFADPPDHGRMR  
KLVSTAFTRRRVEQMRPRIQQITDDLIDVIAAKGEADLVETLALPLPIAV  
ISEMLGVFPFADRSEFERHAEVLTGINASSGFDIAAAGRWFDEYLAELVQ  
QRRREPQDDLISGMLAAQDKGDRITDVELRSNALLLSAGFETTVNLVAN  
GLLALLRHPEAAMALRSEPNLMTTAVDELLRYDSPVSCVTYHFAQEPVEI  
GGFEIRSGEHVVIAAAAANHDPTVFADPSRLDLRREGSGQILSFSGIHF  
CLGAPLARLEGEIAFGTVLRRLAGRLAVPTDSLWVKASFVLRHRLERLPV  
TFTPDRAPNPIDSVHTV

>CYP166A4 (2517991631) *Salinispora arenicola* CNY237

MTDAISFELPWARTDKFDPPAVFDALREQRPLARMRYPDGHVGVIVSSYE  
LVREVLGDPRFSHSCAVGHFPVTHQGQVIPTHPQIPGMFIHMDPPEHTRY  
RRLLTGEFTVRRTSRLTGHEGVATEQIEVMREHGAPADLVATFARPLVL  
RVLSGLVGLPYGERDRYLHAVTLLHDAEADPAEAAAAYEQAGAYFDEVIE  
RRRRQPEDDLISTLVGDGELTGEELRNIVTLLLFAGYETTESALAVGMFA  
LLHHEDQLARLRADPTKIDAAIEELLRYLTVNQYHTYRTASEDIELHGEV  
INKGDSVTVSLPAANRDPARFACPAELDIDRETSGHVAFGFGIHCCLGQN  
LARVELRAGLSALLRAFPNRLRLAVPADEVPLRLQGSVFAVKNLPVCW

>CYP1051A1 (2517991881) *Salinispora arenicola* CNY237

MATDAAITRARTVPAWKALPAAVRDTHRAFDVGNWSDGDVVRVSLGVSR  
PYLVTPNAHVQEVLHERAAIYPRGDDTALWRSVRKLVGDGILAEGLAWAA  
SRRVLAPMFRPARINAMVDTMADAIAGAVDDLHGAATAGTPIDVGRELSR  
IVCSAIMRVFFADRITVRDALRIMKAQETIVTAMAPRILAPLPWWIPMP  
GDRRFRAAVRSIDDILLPVLRLQAQRQPDDGDDLLSRLVRARADDGRALSE  
KMRDDLVSMAVTTETSTVVLTLWLPLLANHPDVANRLYDEIDRVVGGG  
PVRGDHLAELTYTRMVDELRLYPAGWILPRRAATTDVLGGVRINKGAT  
VILSPYVTQRMATAWWGPTAEAFDPERFAAGREAADGRHRYAYYFPFGVMH  
RCLGEHLFNLEAILIVATLLSRFRFALTDTSMPGVKVAASRTPARTVEMI  
LKPVPVPPAR

>CYP105G5 (2517991905) *Salinispora arenicola* CNY237

LTIETTETTPADDSLRAPLPRQFMQRDDPSKLPPALAAAEQSPVGRSTL  
PDGDPFWMVSGYDEARAVLSDFRFSDFRYHPRFKKLSGQLGERLRNDK

ARAGSFINMDPPEHTRYRKLLTGQFTVRRMRQLTVRIEQIVTEQVDVMLA  
EGNSADLVSAFAVPVPSLMICELLGVRYEDRTEFQRRRAAGLLQTDLPKQ  
AVENLEAQRAFMQRLVTDKRRTPADDMISGLVHHAGAEPPLTDDELVGIA  
TLLLLFAGLDTTASMLGLGMFMILLQRPEQMAVLRDDPSRIGDAVEELLRYL  
TVVSTGLFRFAKEDVVLGDEHIPAGSTVVVSLMAANRDGRHWPEPETLDV  
TRVRSSHLAFGHGVHQCLGQQQLARIELTVGITELLRRLPNVRLAVPPADV  
PLRNDMITYGVHRLPILWDTL

>CYP107Q4 (2517991906) *Salinispora arenicola* CNY237

MTTTAETS AETIDLFSPEVVADPFGWYARLREETGPTTGTNLNIGTMMGGP  
EMWLVTTRYEDVRQVLTDPFRFLTNPFPADSPLEDIRAGVFKRLDFPPDLIPW  
MANLLNVSDGEDHTRLRLKLVSYALTAHRIGKLRPRVEKITADLLDKLAED  
GKDGSPVDLVEEYCYPLPVTVICELVGIDEPRPHWRAWGDSMATMNGER  
IPTTLVKCIELARELIAKRRAEPQDDLVTALVQAQAEQDNRVSDDEIIGI  
LFSLVTAGHQTTTYLIGNSVILLLENPDQLARLKENPSMWPQAVRELQRL  
GPIQFAQPRFPSEDIELGGVTIPRGAPVAPLLLAANTDPRRFPDPNKLI  
DRLAVGSEGLHGFKGKGIHRCLGQHLAYQEAVALQGLFTRFPDLSLAVPR  
EEIPWILRPGFTRTRTLPLKLV

>CYP1005A1 (2517992030) *Salinispora arenicola* CNY237

VSAVLFRSWTKTAGTRWPDVTRVADQSGTEHLVVTRHALVRQVLTQATY  
RPDNAL EAVTPVPVAAALRVLAGHRFRLPPTLANNGGASHPAIRALVADAL  
HPTKVAAQRPWLTGLVADRVASIRTTLDSSGGPVDLYADLTADLPLLVLAR  
LVELPDAPVNAVQFARAALFWAPLDADRQLALADEVGRFHQVLRFA  
DTGGGLAAALRATGHSPDVLVGALFFLLVAGQETTSQFLTLLHRLSGEP  
TIRAALRAGSISVADVVEEGLRLEPPIVTVRRVAAVDSTLGGTTVAAGTS  
VLLWLARAGRDPVAVVAAPDEFPRPGQRGSRRHLAFGAGAHRCCLGDQLARME  
AAVVVEQATPLLDGVTVVRPPWYPDNLTFRMPDAFVVRR

>CYP208A12 (2517992137) *Salinispora arenicola* CNY237

MTLDTITPRVPLGPPTAALRMLLVMKRDRLGMLSSAAARYGDASRLPVG  
HKALWFFNHPRYAKHVLADNSANYHKGIGLVHARRALGDGLLTSEGDLWR  
KQRKVIQPAFQSRRIAQQAGMIAEEAFALVERLRARAGAGPVELTAEITG  
LTLGLVLGRSLLDADLAGFDSIGDSFARVQDQAMFELETNLAVPMWIPLPR  
QIRFRARRRKLQAVVDTLVDGRAGNLAGRVDVLSRLILSARGEADPRVGH  
ERLRDELVTLLLAGHETTASTLGWTLSLIDRHPGVWERLHAEAVEVLGDR  
LPEYDDLRLRLRYTVMVVEEAMRLFPPVWLLPRRALAPDTIGEYRVANAD  
VVISPYTLHRHPEFWPNPERFDPERFAPGQAADRPRYAYLPFGAGPRFCV  
GNNLGMMEAVFVIALLCRHLRLTGVPGYRLVPEPMLSLRIRGGPLVVRP  
VS

>CYP105AB8 (2517992846) *Salinispora arenicola* CNY237

MTETASSRLTDTEFPVQRECPFAEPVEYEQIREQSSIAMVRLTGGGEAWW  
ISGHEQGRAVLADRRFSSDRKANFPFVSTDPAIRKRLHAQPLSLISMDG  
AEHTQARRALIGEFTVRRLAALRPRIQQIVDQCIDEMLTTDQHRADLVKT  
LSLPVPSLVICELLGVPPYADHDFEQEHTATLVRRNTASEVRQHSIDELNA  
YL GALIDRKLASPDDDLGRQIARQHRDGTFRSSMVSLAFLLLVAGHET  
TANMISLGVVGLLQHPEQLAMIKDDPKTPLAIEELLRFFTIVDSVTSRV  
ATEDVRFGDTTINAGDGVVVSGLSADWDPTVFADPDRLDLERGARRHHLAF  
GFGPHQCLGQNLARLELQIVFDTLFHRIPTRLRLAAPLDKIPFKTDAAIYG  
ARELPVAV

>CYP107AY2 (2517992949) *Salinispora arenicola* CNY237

MTAEPTPIPRSGARLGQEYDQLRKTGDVHQVLLPDASLAWLVNPEVAAR  
ALADPRLALNRRNSRGGWSGFALPPALDANLLNLDAPDHTRLRRLVGPAP  
SPQORVAALRPGIRRAAEHLLDTLVATSGPTDLVTGYCNPLSVQVIADLMG  
VPEAGRTNLRAWTDMLTSYPPDRDAIRRAVTELHGYVVDLIDIKQQQPG  
DDLSTLVITIEQDGDRLSRDELTSLAFLILFAGYENTANLIASAVLWLLD  
HGGLNVVPISEAIEATLRHEPPAPVAIRRFPTEDIIIGGV TIPAGDTVLL  
SVAAATRGADGNAARLAFGNPHYCLGAALARVEAEALTVLARRLPGLT  
LAVPPSQVRWRPTFRTHGPAELLVGW

>CYP105CT1 (2517992980) *Salinispora arenicola* CNY237

MNSPNHMPADRSLTAPTSGCPMALSRGRVGLDVADEISELRDGGRLGRIT  
TAFGQEATLITRYDEVRAQMADSVVFNVAGVPSPPALVDGGFDTESVRRR  
RTVGNLIMLDPPEHTRLRRMVAAWFTTRRVERLRPRVVEIIDAALDEMER  
SGPPVDLVAMFAKTVPI TVICELIGVPEELRERYRRRAERAVSASAVSTP  
LDELRLREAGWVSRELIEYHRENPSDDIIGMLLREHGTD SHDDGITDDE  
LVGLANALLIAGHETTTQMLSMGTLALLRHPDQLALLRDDPSIVARAVEE  
LLRYVGV LHGGFVRVATRDTRLGGHRIHAGELVVPALTAANRDPRLITDG  
DRLDITRPPTSHVAFGHGVHFCIGAPLARMELREAFPALLRRFPGLRLAV  
PDSELEFTQGT TVYSLRGLPVTW

>CYP154M5 (2517992997) *Salinispora arenicola* CNY237

VEQSCPYKLDVTGRDVHAEGEAI RARGPVAQVELPGGVQGSVVTGYQAAR  
QVLADPRFAKDPKKWPAYTSGAIPP NWPLIGWLLMDNM TNDGADHQRLR  
KLVS HGFTPRQVERTRPLIVKIVNDLLDGLSSAGPDEVVDLKGRFATPLP  
ARVICDMFGVPEALRASVLRGAQVNV TSSISGEEAEANVEQWHRELLELV  
EAKREKPEDMASLLIAAKEEDGSTLTQEEVVGTLHLM LGAGSETLMNAL  
SYAVLGMLSNPGQYEMVRNGTSSWDDVIEETLRAQAPVAQLPLRYATEDV  
AVGGAVIKAGDPVLMGFTAIGRDP AVHGETAGDYDITREDKTHLSFGHGV  
HFCLGAPLARLELKIALPALFERFPNM TLAVRPDQLEPQGT FIMNGHREL  
PVR LGQPATVLA

>CYP211B2 (2517993465) *Salinispora arenicola* CNY237

MDVSEAI AVLISPSGR LDPYPTYEQ LRAHG PVSRTTAGLFVVTGYAEADM  
VLRDPRFVVLDDDLRDDVFPHWQDSPA IKS IARSMLRTNPPDHSRIRRLA  
AGAFTPRRVAAMREV VTAQADEL VDEMIRAGRDGARVDFMDMFAYPLPVA  
VICALLGVPAADRSRFRRWAGDLTGILEPEITPEELAGADAGADELRDYF  
TGLIEQRRRAPADDLTALVQAHDADGDRLS GEE LLANLVVLLVAGFETT  
TNLLGNGLVVL TRPEAAAAALRDEPD LAPGYVDELLRYDSPVQLTTRTVR  
ESVSFAGTEL PADSWLLVLLGAANRDP RRFDPARFDPGRAQS QPLSFGA  
GPHYCLGAGLARLEAQVAFPLLLRRLPELALAGRPSRRTRLTLRGYETLP  
ITVGAVTADRGT PAGVAPGTP

>CYP107EU1 (2517993823) *Salinispora arenicola* CNY237

VTIGQTL PDLVYSPEFTRDPYAIFARLREQAPVCRVTTHRGMSAWMVTRH  
ADVRALLADNRLAKDGNRIGELMPRHSTLTGAATGFPPGLTTNMVNSDPP  
DHTRLRHLVGREFTGHRVEGLRPRIEEIVDDLLDGVAACGDEADLAETLA  
RRLPIAVIGELLGVPEADRAEFFRWADTLYGGTASPEALGQAYNAIVDYL  
GRLCDAKRDPADDLLTALVQVSADEDRLSREELVSMALLLVAGHETTS  
KQISNGVLALLLNPEQLKLLKAQPARTAGAVEELLRFEGPSLSASLRFTT  
EPVEVAGVVIPEGEFVLLSLASGNRDPEKFPDPDRLDITRSTQGNLAMGH  
GIHHCVGAALARLELEIVLSRLVARFPQMQLAVEADDLEWLVNSFFRAPL

HLPVSLRR

>CYP105W2 (2517993866) *Salinispora arenicola* CNY237

MTGYQDRPTGDQPGAPVPSGSTDPGIGAFPLPRRCPPFSPPAEYARLRAEH  
PVVRLPMLGGDTAWVVSRRHADVRQVLSDFRMSADRRRPFGFPKFAPTTEGQ  
RQASFANFRPPLNWLDPPEHAICRRQIVDEFVSRRVRQSRALVERVVDTH  
LDALTAAPGADLVSTFAYPVPSQVICEVLGVYPYGEHEFFERRSTLMFRR  
STPADERARCAREIRDFLDMVVTDKHRPGDDVLSRLLYRQRRAGGVDHE  
AVVSMAFVLLVAGHVTTSNMLALSVLALLTHPARLARLRAEPPERFPAAVE  
ELLRYFTVVEAATARTATAEVTIGGVTIAAGEGVVALGQAANRDPRVFEH  
PDEFDPDRDARAHAFGYGRHICPGQHLARLEMEVALSRLFRRLPGLRLT  
MEVSDLPLKEDSNIFGLYALPVAW

>CYP248A2 (2517993874) *Salinispora arenicola* CNY237

VLADAVTAFDPTAVDVRRDPYPSYHWLLRHDPVHRGAHQVWYVSREFADV  
AVLGDERFARTGIRRFWTDLVGPGLLSQIVGDIILFQDEPDHGRLRGVVG  
PAFSPSALRRLEPTIEATVNDLLRPARALGAMDVVADLAYPLALRAVLEL  
LGLPAGDANAVGRWSRAVGRTLDRGATAEDMRRGHAAIAEFADYVERALA  
ERREDGADLLALMLAAHRSQLMsrNEIVSTVVTFFITGHETVASQLGNGL  
LSLLDHPEQMELMRRQPHLLPHAVEECLRFDPVQSNTRQLAADVELHGR  
RLRRDDVVVVLAGAANRDPGRYDRPDELDIRRDPVPSMSFGAGMRYCLGS  
YLARLQLRTALGAMVALPDLRLVCSPNELAYQPRMTMFRGLTRLFPVAFTPA  
G

>CYP105CH1 (2517993920) *Salinispora arenicola* CNY237

VSSLPLPTYPKLRDPADPFLPPAEYLAIQSEKPIAKVLLPSGRPTWLITG  
HALARQVLTEPCVSVDRRHFNFPYPVNPDAVVAQVARWTYILLGDDPPL  
HTERRRLLI SEFTVRQAQAMRPRIQQLVDFHLEQLIAAGPGADFSKHFAM  
QVPSAVICEMLGVPFADHDYFQERTALQLRRDVPVAAQKQAIDELLAYFE  
QLIQEKSSHPGDDVLSRLIVSNRETEAFDHEALVALGLLLLLVGGHETTAN  
TLTLATATMLERPEIAEQLRTPSLMPSAVEEFLRYFSVAVAVSRIATAD  
LQVGGQLVRAGESMLLVNLTARDGTVFPEPHRLDIRRNARNHLAFSHGI  
HQCMMQNLARVEMQIALDTVLRRLPGLHLVTPFEELPFKYRHLVWGIEEL  
RVAW

>CYP1005A1 (2517867720) *Salinispora arenicola* CNT005

VSAVLFRSWTKTAGTRWPDVTRVADQNGTEHLVVTRHALVRQVLTDAQTY  
RPDNAMEAVTPIPVAAALRVLAGHRFRLPPTLANNGGVSHPAIRALVADAL  
HPTKVAAQRPWLTGLVADRVASIRTTLDSSGFPVDLYADLTADLPLLVLAR  
LVELPDAPVNAVKKQFARAALFWAPLDADRQLALADEVGRFHQVLRIFA  
DTGGGLAAALRATGHSPDVLVGALFFLLVAGQETTSQFLTLLHRLSGEP  
TIRAALRAGSSSVADVVEEGLRLEPPIVTVRRVAAVDSTLGGTTVAAGTS  
VLLWLRAGRDPVAVAAPDEFPRPGQRGSRRLAFAGAHRCCLGDQLARME  
AAVVVEQATPLLDGVTVVRRPPWYPDNLTFRMPDAFVVRR

>CYP125A41 (2517869090) *Salinispora arenicola* CNT005

MTEPRIPAGFDFTDPEVLAHRVPREEFAELRRAPVWWNAQPRGSAGFDD  
DGYWVVTRYADVMTVSRSDTYSTRENTAIARLRPDTTREDIEMQRVIML  
NVDPPPEHTKLRAIVSRGFTPRAINALRGSLAERAHIVRDAAVRGVGDV

TDVACELPLQAI AELIGVPQHRRKVFWDWSNQLIGYDDPAYGTDPLTASA  
ELLYAMEMAERQSPSDDLVTKL VNAQIDGHELT TDEF GFFVMLLAVA  
GNETTRNAITHGMVAF LDNPEQWELFKAERP KSAVEE IIRWATPVNVFQR  
TALVDTVLGGQAI SAGQRVALFYGSANFDEAVFEDPERFDITRSPNPHLG  
FGGSGAHFCLGANLARLEIELIFNSIADHLPDIRKVAAPQRLRSGWINGI  
RQMPVRYR

>CYP211C1 (2517869238) *Salinispora arenicola* CNT005

VVDVEELLTRLYSAQGRQDPFPVYADLHAQGPIAALPPEPERRRVA AVAV  
GYDLVGAVLRDPEWSKAPPPGWTEQEILRTLQTSMMFINPPDHGRMRHVF  
AGTFTPRRLGALEPVVNRVADELDRMADAGAGGLDFVAEFAYPLPARVM  
AEFIGIPETELDWYRERVDVIDAFLDVAGKTPQRLAAANAAGAE LRAFYG  
ELLARRRRTPGEDLISGLVEAVDAGGVELTEDELVS NLIVLFNASFVTTV  
YMLSNGLPVLLAHPEVAAALATDPVLTAGAVDEILRLQAPVHLLARAAPR  
DTV LGGVPI PQGQNVLLLI AAANRDP AHFPDPDRFDPWRSGPPSLAFGLG  
LHYCLGAAVSRLEGR LALPRLLSRFPRLRIMEQPVYSGSLFLRGIDKLSV  
SPGGREYP

>CYP105W2 (2517869353) *Salinispora arenicola* CNT005

MTGYQDRPTGDQPGAPVPSGSTDPGIGAFPLPRRCPFSPPAEYARLRAEH  
PVVRLPMLGGDTAWVVS RHADVRQVLS DPRMSADRRRP GF PKFAPTTEGQ  
RQASFANFRPPLNWLDPPEHAICRRQIVDEF SVRRVRQSRALVERVVDTH  
LDALTAAPGADLVSTFAYPVPSQVICEVLGVPYGEHEFFERRSTLMFRR  
STPADERARCAREIRDFLDMVVT DKEHRPGDDVLSRLLYQQRSAGGVDHE  
AVVSMAFVLLVAGHVTTSNMLALSVLALLTHPARLARLRAE PERFPAAVE  
ELLRYFTTVVEAATARTATAEVTIGGV TIAAGEGVVALGQAANRDP RVFEH  
PDEFDPDRDARAHLAFGYGRHVCPGQHLARLEMEVALSRLFRRLPGLRLT  
MEVSDLPLKEDSNIFGLYALPVAW

>CYP248A2 (2517869361) *Salinispora arenicola* CNT005

VLADAVTAFDPTAVDVRRDPYPSYHWLLRHDPVHRGAHQVWYVS RFADVR  
AVLGDERFARTGIRRFWTDLVGPGLLSQIVGDIILFQDEPDHGR LRGVVG  
PAFSPSALRRLEPTIEATVNDLLRPARALGAMDVVADLAYPLALRAVLEL  
LGLPAGDANAVGRWSRAVGRTLDRGATAEDMRRGHAAIAEFADYVERALA  
ERREDGADLLALMLAAHRSQ LMSRNEIVSTVVT FIFTGHETVASQLGNGL  
LSLLDHPEQMELVRRQPHLV PQAVEECLRFDP AVQSNT RQLAADVELHGR  
RLRRDDVVVVLAGAANRDPGRYDRPDELDIRRDPVPSMSFGAGMRYCLGS  
YLARLQLRTALGAMVALPDLRLVCSPNELAYQPRTMFRGLTRLPVAFTPA  
G

>CYP107FS2 (2517869424) *Salinispora arenicola* CNT005

MPVPQGEQNL TTEVFADPKALFATLGSRQPLHRISLPDGM PAVLVTGNRE  
ARQALSDPRLVRSITAAAPELHKYHPLASDDYALSRHMLFADPPDHGRMR  
KLVSTAFTRRRVEQMRPRIQQITDDLIDVIAAKGEADLVETLALPLPIAV  
ISEMLGVFPADRSEFERHAEVLTGINASSGFD AIIAAGRWFDEYLAELVQ  
QRRREPQDDLISGMLAAQDKGDR LTDVELRSNALLLSAGFETT VNLVAN  
GLLALLRHPEAMAALRSEPNLMTTAVDEL LRYDSPVSCV TYHFAQEPVEI  
GGFEIRSGEHV VIAAAAANHDPTVFADPSRLDLRREGSGQILSF SHGIHF  
CLGAPLARLEGEIAFGTVLRRLAGRLAVPTDSL VWKASFVLHRLERLPV  
TFTPD RAPNPIDSVHTV

>CYP105CN1 (2517869425) *Salinispora arenicola* CNT005

MAAPAPQATQSTTPHPPSYPLPRECPYRPSAGTARLRDAGPVSTVRLYDG  
RTAWLVGTGAEEARALLADSRVSNRADFPNYPVMDEHLSMRATREMAREE  
EGGFAAALFGMDPPEHTRQRQQLLLPRFTVRQVAARRPAIQRIVDEHLDAM  
EANGSPADLVSAFATPVPTMVVCTHLGVYPYQDRTRFEPAVAGLFEPDRAD  
AAMAELTAYLHQLIETKQSEPGDGVIDHLIANHLRPGAIDRAELVAIASA  
ILVAGTVTTSSAIALGTLALLTAPGQYAALVDNPDLPVGAVNEILRYLSL  
VEQLARVATEDIEIGGKLIRAGDGIIVSFAAGNLDPNVTTHPDRLDVALP  
PTNHAFSHGIHHCIGQNLALLELDIAFRALVSRFPTLRLAVPAEQLPY  
FAGDVPRLACLPTW

>CYP105CP2 (2517869427) *Salinispora arenicola* CNT005

MTKSMVPQDLPAFPIPRECPYRPSAQHVSLRSGGPMKVRLYNGRTAWLV  
TDSAHAARVLSYRRVSIKPYHGNYPILLNEEFKVVDSGYADVLFVDP  
EHTRQRQMIMPSFTLRRTAVLRPDIQRIVDDKLDEMRRHGAPGDLVTEFA  
QPVPMSMVSFLLGVFWEDHEEFETPAHKLFPVPELAEEATELGAYLERLI  
QKKEQPGGTGGTGLLDDLRDHLRAGALSDELVHIAMAMLVAGTDTT  
NVISLGTALLDNPDQWAALRDNPDDELIPGAVEEILRYTSLIEAFARVAV  
SDIELNGAVIKEGEGILISSAGVNFDPALAPDPGRFDIRRPPRPSFSFSH  
GIHRCPGDNLARLELEIAFRSLVTRMPNLRRTAKPIDQIPSNNDGTLQRL  
YELPVVW

>CYP244A4 (2517869650) *Salinispora arenicola* CNT005

MSTTTNTELTEAPETNMPVDPGLFDCMPDLIAAARVAPVVRIPLYGRHAW  
VVCDELVKQALTHPKMGKDIALVPEWMRQPGMLVTAQPDPEYARAMIMS  
DGENHARIRRIHAPVLSRPNTERWGERVADKVEGFLDELSQAGSGGSTEV  
NVVTNYTHKIPLAFISEMLGLPPEAEHRLRGITDIMLYSSDYAARREAIG  
GLFGAVEDWVRNPADLRDGVITGLLAASDGPDAAVTEGEVIVWTLGMIIT  
GYETTGSLLISTSLYEAIRPPHERPKTDEDITAWIEETLRVHPPFPHTW  
RFPLEDIELGGYLIPKGAPVQVSIAAANRKPGEAGDSFDAERRGHGHLF  
GLGMHYCIGAPLVRLEAQIAVRGFLRRFPQARLSAETAVQWESEWMIRRM  
SVLPAVLS

>CYP245A7 (2517869654) *Salinispora arenicola* CNT005

MPSATLPRFALTGWSRENIVNPYPVYQRYREVASVHRGESGGDAPDTFYV  
FSYDEVVQVLSSNCFGRGRSLDAAKASVPVPAEQKALRAIVENWLVMFDP  
PRHTELRSLLNRSFSPRIVTELPRPRIARIAQELLSRLGQQVDVDLVESFA  
APLPILVISELLGIPEERRAWLRANALALQEASSSRAGRVDVGYAQAEVA  
AQEFTEYFREQVRLRRGRAGGDLITILANAQERGAPVSLDAIVGTCVHLL  
TAGHETTTNSLAKAVLALREHPAVLDELGAEGLTDAVEEFLRYDPPVQ  
AVTRWAHQDTTLGGCDIPRGSRVALLGSANRDPARFPSPDVLVRRPAD  
RHLSFGLGIHYCLGATLARAELEIGLQALLDGVPTLGYGTQHVDYADDLV  
FHGPSRLVLVNLGERCK

>CYP113D13 (2517869917) *Salinispora arenicola* CNT005

VNLADKLGFNQAQFWLRGVRPEELVSYQEQAAGLWNVYGYPEIAEALSDPV  
AFSSETQRLAGEWESFTEGNIVAMDPPAHKKLRKLVSQAFTPKVVADLEP  
RIAVVTGDLDDKVSGRMELVADLAYPLPVIVIADLLGVPSDDHPLFKQWV  
EAMFSTGTQISLKDPSPEQQEHFEQGMQVENLTGYLKVHIRERRVQPRD  
DLLTKLVAEVDDGQRLTDVEASNFAMALLVAGHLTTTMLLGNTIILCLDAF  
PDQRAKVQADRTLVPGAIEEAMRFLSPSGAVARVTTREVKLGGRITIPANQ  
MVIMWVAAANRDPQFTDPDVFDLTRDPNTQMSFGRGIHFCLGAPLARLE  
SRVALNILLDRFPDLRTSDDDPPEVMPHPTMAGAKRLPLLL

>CYP163B22 (2517869920) *Salinispora arenicola* CNT005

MPVTMQEGFRRTERRREDIVVSAFATGHTVLDLTDPATFVNHEPGFEFWAGV  
RDHDPVFWHESGAGRPGFVWVSRHADVLACYADPVRLSSARGTVLDDVLLR  
GPDSAGGRMLAVSDRPRHRDLRAVMLRAFSPRVLGEVSDLVHRRAGELIS  
RVTQGGAFDFAAAVAEHIPMGITICDLLSIPHADRPAMLGWNKEALSSDDA  
EADPFPAALAAARNEILLYFTDLAAWRRARPGDDVISLIATAVVGDELLSLE  
DVALNCYSLILGGDESSRVSAICAVEAFADFPDQWRAVRDGTVSIDTAVE  
EVLRWATPALHFARTATTDLDLAGHRIRAGEIVTLWNISANFDERSFASP  
NRFDVGRRPNKHVSFGHGPHFCLGAYLGRAELHALLTALAGHVTHIERAG  
PARRIYSNFLNGHSSLPVSFTGR

>CYP105AB8 (2517870058) *Salinispora arenicola* CNT005

MTETASSRLTDTEFPVQRECPFAEPVEYEQIREQSSIAMVRLTGGGEAWW  
ISGHEQGRAVLADRRFSSDRKANFPFVSTDPAIRKRLHAQPLSLISMDG  
AEHTQARRALIGEFTVRRLAALRPRIQQIVDQCIDEMLTDDQHHLVKT  
LSLPVPSLVICELLGVPPYADHDFQEHATLVRRTASEVRQHSIDELNA  
YLGALIDRKLASPDLLGRQIARQHRDGTFRSSMVSLAFLLLVAGHET  
TANMISLGVVGLLQHPEQLAMIKDDDPDKTPLAIEELLRFFTIVDSVTSRV  
ATEDVRFGDDTTINAGDGVVVSGLSADWDPTVFADPDRLDLERGARRHHLAF  
GFGPHQCLGQNLARLELQIVFDTLFRHRIPTLRLAAPLDKIPFKTDAAIYG  
ARELPVAW

>CYP208A12 (2517870310) *Salinispora arenicola* CNT005

MTLDTITPRVPLGPRTAALRMLLVMKRDRLGMLSSAAAARYGDASRLPVG  
HKALWFFNHPRYAKHVLADNSANYHKGIGLVHARRALGDGLLTSEGLDWR  
KQRKVIQPAFQSRRIAQQAGMIAEEAFALVERLRARAGAGPVELTAELTG  
LTLGVLGRSLLDADLAGFDSIGDSFATVQDQAMFELETNAVPMWIPLPR  
QIRFRARRRKLQAVVDTLVDGRAGNLADRVDVLSRLILSARGEADPRVGR  
ERLRDELVTLLLAGHETTASTLGWTLSLIDRHPGVWERLHAEAVEVLGDR  
LPEYDDLRLRLRYTVMVVEEAMRLFPFVWLLPRRALAPDTIGEYRVANAD  
VVISPYTLHRHPEFWPNPERFDPERFAPGQAADRPRYAYLPFGAGPRFCV  
GNNLGMMEAVFVIALLCRHLRLTGVPGYRLVPEPMLSLRIRGGLPLVVRP  
VS

>CYP105BL2 (2517870542) *Salinispora arenicola* CNT005

MSSHSAAPDPETATPLHTLAPELTFPQFERSTPFDPPQAYTELSGRCPV  
APVSMADGKPSWLITSFEGVRTTLSDPRFSSDMSHPGFPNRTGKPVDDL  
KDTLGAMDGERHRYRRMLTGELTVRRAKAMRPVITQITDEALDQLAAAG  
PGADLVKHVAFVVPSPRVACHLVGIPLSDYELFTGMAATLMDSTSSDDQFA  
ALQNMVSYFDTLVTDRHHDRDDLGHMVRRYLATGELTRDMLIRLAWTT  
MAAGQETTAHMIIGLVAALLRHPDQLELLRREPHLLPGAVDELMRYLPLI  
QFGIPRVAMDDVEVDGQTVTAGEGVVALPPLANRDPVFERPDELDVRRN  
ARQHLTFGYGPQCFAHALARLELEVYGRLLERFPTLRLADSDADLKVQ  
DKDIMYRVSELAVTW

>CYP166A4 (2517870718) *Salinispora arenicola* CNT005

MTDAISFELPWARTDKFDPPAVFDALREQRPLARMRYPDGHVGVIVSSYE  
LVREVLGDPRFSHSCAVGHFPVTHQGGQVIPTHPQIPGMFIHMDPPEHTRY  
RRLLTGEFTVRRTSRLTGHVGEVATEQIEVMREHGAPADLVATFARPLVL  
RVLSGLVGLPYGERDRYLHAVTLLHDAEADPAEAAAAAYEQAGAYFDEVIE  
RRRRQPEDDLISTLVGDGELTGEELRNIVTLLLFAGYETTESALAVGMFA



LLHHEDQLARLRADPTKIDAAIEELLRYLTVNQYHTYRTASEDIELHGEV  
INKGDSVTVSLPAANRDPARFACPAELDIDRETSGHVAFGFGIHQCLGQN  
LARVELRAGLSALLQAFPNRLRLAVPADEVPLRLQGSVFAVKNLPVCW

>CYP1051A1 (2517870815) *Salinispora arenicola* CNT005

MATDAAITRARTVPAWKALPAAVRDTHRAFVDVGNWSDGDVVRVSLGVSR  
PYLVTNPAHVQEVLEHERAAIYPRGDDTALWRSVRKLVGDGILAEGDAAA  
SRRVLAPMFRPARINAMVDTMADAIAGAIDDLHGAATAGTPIDVGRELSR  
IVCSAIMRVFFADRITVRDALRIMKAQETIVTAMAPRILAPLVPWWIPMP  
GDRRFRAAVRSIDILLPVLRQAQRQPDGDDLLSRLVHARADDGRALSE  
KMRDDLVSMVAVTTETSTVVLTWLVPLLANHPDVANRLYDEIDRVVGGG  
PVRGDHLAELTYTRMVLDLRLYPAGWILPRRAATTDILGGVRINKGAT  
VILSPYVTQRMATAWWGPTAEAFDPERFAAGREAADGRHRYAYYPFGVGMH  
RCLGEHLFNLEAILIVATLLSRFRFALTDTSMPGVKVAASTRPARTVEVI  
LKPVPAPVPAR

>CYP105G5 (2517870841) *Salinispora arenicola* CNT005

LTIETTETPPADDSLRAPLPRQFMQRDDPSKLPPALAAAEQSPVGRSTL  
PDGDPFWMVSGYDEARAVLSDFRFSDDRFYHPRFKKLSGQLGERLRNDK  
ARAGSFINMDPPEHTRYRKLLTGQFTVRRMRQLTVRIEQIVTEQVDVMLA  
EGNSADLVSAFAVPVPSLMICELLGVRYEDRTEFQRRAGLLQTDLPKQ  
AVENLEAQRAFMQRLVTDKRRTPADDMISGLVHHAGAEPPLTDDELVGIA  
TLLLFAGLDTTASMLGLGMFMLLQRPQMAVLRDDPSRIGDAVEELLRYL  
TVVSTGLFRFAKEDVVLGDEHIPAGSTVVVSLMAANRDGRHWPEPETLDV  
TRVRSSHLAFGHGVHQCLGQQQLARIELTVGITELLRRLPNVRLAVPPADV  
PLRNDMITYGVHRLPILWDTP

>CYP107Q4 (2517870842) *Salinispora arenicola* CNT005

MTTTAETSATIDLFSPEVVADPFGWYARLREETGPTTGTNLNIGTMMGGP  
EMWLVTTRYEDVRQVLTDPFRFLTNPADSPLEDIRAGVFKRDLFPDLPW  
MANLLNVSDGEDHTRLRKLVSALTAHRIGKLRPRVEKITADLLDKLAED  
GKDGSPVDLVEEYCYPLPVTVICELVGIDEPDRPHWRAWGDSMATMNGER  
IPTTLVKCIELARELIAKRAEPQDDLVTALVQAQAEQDNRVSDDEIIGI  
LFSLVTAGHQTTTYLIGNSVILLLENPDQLARLKENPSMWPQAVRELQRL  
GPIQFAQPRFPSEDIELGGVTIPRGAPVAPLLAANTDPRRFPDPNKLI  
DRLAVGSEHGLGFGKGIHRCLGQHLAYQEAVALQGLFTRFPDLSLAVPR  
EEIPWILRPGFTRTRTLPLKLV

>CYP107AY2 (2517871581) *Salinispora arenicola* CNT005

MTAEPTPIPRSGARLGQEYDQLRKTGDVHQVLLPDASLAWLVNPEVAAR  
ALADPRLALNRRNSRGWSGFALPPALDANLLNLDAPDHTRLRRLVGPAP  
SPQRVAALRPGIRRAAEHLLDTLVATSGPTDLVTGYCNPLSVQVIADLMG  
VPEAGRNLRAWTDMLTSYPPDRDAIRRAVTELHGYYVDLIDIKQQQPG  
DDLLSTLVETIEQDGRLSRDELTSALFLILFAGYENTANLIASAVLWLLD  
HGGLNVVPISEAIEATLRHEPPAPVAIRRFPTEDIIIGGVTIAGDTVLL  
SVAAATRGADGNAARLAFNGNGPHYCLGAALARVEAEALTVLARRLPGLT  
LAVPPSQVRWRPTFRTTHGPAELLVGW

>CYP154M5 (2517871690) *Salinispora arenicola* CNT005

VEQSCPYPKLDVTGRDVHAEGEAIIRARGPVAQVELPGGVQGWSVTGYQAAR

QVLADPRFAKDPKKWPAYTSGAIPPNWPLIGWLLMDNMTTNDGADHQRLR  
KLVSHGFTPRQVERTRPLIVKIVNDLLDGLSSAGPDEVVDLKGRFATPLP  
ARVICDMFGVPEALRASVLRGAQVNVTSISGEEAEANVEQWHRELLELV  
EAKREKPDDEMASLLIAAKEEDGSTLTQEEVVGTLLHMLGAGSETLMNAL  
SYAVLGMLSNGQYEMVRNGTSSWDDVIEETLRAQAPVAQLPLRYATEDV  
AVGGAVIKAGDPVLMGFTAIGRDPVHGETAGDYDITREDKTHLSFGHGV  
HFCLGAPLARLELKIALPALFERFPNMTLAVRPDQLEPQGTFFIMNGHREL  
PVRLGQPATVLA

>CYP105CT1 (2517871707) *Salinispora arenicola* CNT005

MNSPNHMPADRSLTAPTSGCPMALSRGRVGLDVADEISELRDGGRLGRIT  
TAFGQEAMLITRYDEVRAQMADSVVFNVAGVPSPPALVDGGFDTESVRRR  
RTVGNLIMLDPEHTRLRRMVAAWFTTRRVERLRPRVVEIIDAALDEMER  
SGPPVDLVAMFAKTVPITVICELIGVPEELRERYRRRAERAVSASAVSTP  
LDELRLREAGWVSRELIEYHRENPSDDIIGMLLREHGTDSDHDDGITDDE  
LVGLANALLIAGHETTTQMLSMGTLALLRHPDQLALLRDDPSIVAGAVEE  
LLRYVGVVLHGGFVRVATRDTRLGGHRIHAGELVVPALTAANRDPRLITDG  
DRLDITRPPTSHVAFGHGVHFCIGAPLARMELREAFPALLRRFPGLRLAV  
PDSELEFTQGTTVYSLRGLPVTW

>CYP105CH1 (2517871762) *Salinispora arenicola* CNT005

VSSLPLPTYPKLRDPADPLLPAPAEYLAIQSEKPIAKVLLPSGRPTWLITG  
HALARQVLTEPCVSVDRRHFNFPYPVPNPDAVVAQVARWTYILLGDDPPL  
HTERRRLLISEFTVRQAQAMRPRIQQLVDFHLEQLIAAGPGADFSKHFAM  
KVPSAVICEMLGVFPADHDYFQERTALQLRRDVPVAAQKQAIDELLAYFE  
QLIQEKSSHPGDDVLSRLIVSNRETEAFDHEALVALGLLLLLVGGHETTAN  
TLTLATATMLERPEIAEQLRTPSLMPSAVEEFLRYFSVAVAVSRIATAD  
LQVGGQLVRAGESMLLVNLTARDGTVFPEPHRLDIRRNARNHLAFSHGI  
HQCMGQNLARVEMQIALDTVLRRLPGLHLVAPFEELPFKYRHLVWGIEEL  
RVAW

>CYP211B2 (2517871999) *Salinispora arenicola* CNT005

MDVSEAI AVLISPSGRLDPYPTYEQLRAHGVPVSRTTAGLFVVVTGYAEADM  
VLRDPRFVVLDLDDLRDDVFPWHQDSPAIXSIARSMLRTNPPDHSRIRRLA  
AGAFTPRRVAAMREVVTAQADELVDEMIRAGRDGARVDFMDMFAYPLPVA  
VICALLGVPAADRSRFRRWAGDLTGILEPEITPEELAGADAGADELRDYF  
TGLIEQRRRAPADDLTALVQAHDADGDRLSGEELLANLVLLVAGFETT  
TNLLGNGLVLLTRPEAAAALRDEPD LAPGYVDELLRYDSPVQLTTRTVR  
ESVSFAGTELPADSWLLVLLGAANRDPRRFPDPARFDPGRAQSQPLSFGA  
GPHYCLGAGLARLEAQVAFPLLLRRLPELALAGRPSRRTRTLRGTETLP  
ITVGAVTADRGTAPGAVPGTP

>CYP247A7 (2517872040) *Salinispora arenicola* CNT005

VRLTPGAARDIDLDSVNLFDLDLYTSGDPHPIWDVMRAQSPLHHQVLADG  
REFWSVTRYDDVCRVLGDYREFTSERGTVVTHLGEDDIAAGKLLTSTDPP  
RHTQVRRRAIGAKLTARAVASWQDRIRDAIVRFLEPALDGDTFDLAEQALL  
LPAIVTGPLLGIPEWDQELVQLTAMVTAPSDPHFQHGSEAAATLAISHHE  
LVTYVTEWVKQRRSAGGGDGSLLDHLMSVRVGGAPLTDEEIALDGYISILL  
GANVTTPTVSGTVLALIERPEQFEKAQADPSLLANLVEEGLRWASAACN  
FMRYAVNDTRIGGGTVPAGGAVVAWIGSANRDESYFPDPHQFDITRSGAN  
RQVAFGFGPHYCIGAPLARMTLGIFFEEELVQRFSGSIELAGEPQHLSYFI  
AGMTHLPPIVAQKRKTP

>CYP105J3 (2517872124) *Salinispora arenicola* CNT005

MTDSVAFPPQGRVCPHQAPGYRPLAVQRPLAQVTLYDGRRVWAVTTRDLA  
RRLLVDPRISSDRTPAWPAIVPIVAAVNDAAQQKVLKIATALVGTGPE  
HKAQRKMLIPSFTEFRMNALRPMIQEIVDQQLDEMIKSGAPTDLIPAFAS  
AVPVTVLYRLMGIPDDDHGIFEKLSHQLLAGPNANEAYDQLMGYMSRLIA  
ERRRNPGEGLVDDLLAQHGANDDADHDELVSTLVVQVAGNHGTTGSMIAL  
GLFALLQHPEQLAELRADPSLMPTAVDELLRFLSVPDVAVTRLAADDIEVE  
GTIIRKGDGVFFITSLINRDTDVHDAPNSLGWHHASAADHLTFGFGAHQC  
LGQSLARITMEIALGALIDRLPSRLAVPAEEVPFLPAASLQVIAELPIT  
W

>CYP107EU1 (2517872439) *Salinispora arenicola* CNT005

VTIGQTLPLDVYSPEFTRDPYAI FARLREQAPVCRVTTHRGMSAWMVTRH  
ADVRALLADNRLAKDGNRIGELMPRHSTLTGAATGFPFGLTTNMVNSDPP  
DHTRLRHLVGREFTGHRVEGLRPRIEEIVDDLLDGVAACGDEADLAETLA  
RRLPIAVIGELLGVPEADRAEFFRWADTLYGGTASPEALGQAYNAIVDYL  
GRLCDAKRDPVADDLLTALVQVSADEDRLSREELVSMALLLLVAGHETTS  
KQISNGVLALLLNPEQLKLLKAQPARTAGAVEELLRFEGPSLSASLRFTT  
EPVEVAGVVIPEGEFVLLSLASGNRDPEKFDPDRDLITRSTQGNLAMGH  
GIHHCVGAALARLELEIVLSRLVARFPQMQLAVEADDLEWLNVNSFFRAPL  
HLPVSLRR

>CYP1198B1 (2517872723) *Salinispora arenicola* CNT005

MSGELTDQRTAPGAGGNPLRSLMDHGIRANPYPLFGELREAGPTAVEDGS  
VVLFGEYEHCSQILRHRDMGSDTSEAPSIKGFVVDDAERAGSSIFFMDQP  
GHGRQRKLVSQSFTPRIVKSFGPQITHIVDGLFEDFRDKGELDVVTDLAY  
PVSIGIICDLFGIPDDERDMLKEWSDDLALSTELPTLGAAIGVLNVFTRD  
EINRFGSVAMAAHAYFADLIHRRRNKPGDDLVSLLATESNGERLTRFEV  
TSVLATLFVAAHESTTNLISGGILALLRNQDQMAVLRENPGELITNVVDES  
LRYDPPVHLAARMARARTTIGGYDLDPGTIVVVLMAAGNRDPRAYESPDV  
FDVNRKIKNVSLAFGAGAHFCIGSGLAKLEAEIAISAFQRLKNPEVDES  
SLEYRRHIVVRGLEHMKVSFQP

>CYP107AY1 (2517994832) *Salinispora tropica* CNS416

MRAELAPIPRSGARLGQEYDQLRNAGDVHQVLLPDSSSLAWLVNPKLVSR  
ALTDPRALNRRHSRGSWSGFALPPALDANLLNLDAPDHTRLRLRVGPAPF  
SPQRVSALRPRIIRRTAEHLDDLTVATSGPVDLVTGYCTPLSVQVIADLMG  
VPEAGRDLRTWTDMLTSYPPDRDAIRQAVVELHGYVVDLIDTKRQQPG  
DDLALVLTIEQDGDRLRDELTSLAFLILFAGYENTANLIASVLRLLD  
HGGLRGVQLPEAIEETLRLEPPAPAAVRRFPTEEMTIGGATIPAGDIVLL  
SIAAATRGTAGNAARLAFGNGPHFCLGAALARVEAEEALTVLARRLPDLA  
LALPVAQVRWRPTFRTHGPAELLVTW

>CYP163B1 (2517995108) *Salinispora tropica* CNS416

VTAADTGRVSGESQTPAHTVDLADPATFANHDLTGFWQQLRDEEPIHWN  
PPTAGRRGFVVVSRYADILDVYRDDVTFTSERGNVLVTLLAGGDAGAGRM  
LAVTDGPRHAELRKLLLRALGPRVLAPVCAAVRTNTRQMIREAVTKGEC  
FASDIASRIPMMTISNLLGVPDADRAFLSLTKTALSADDESISETESAM  
ARNEILLYFQDLMEFRRDHPGEDVVSMLVNSSIDGAPLSDDDIVLNCYSL  
IIGGDETSRLTMIDSVNTLAAHPQQWRRLKDGQCEIDKAVDEVLRWASPS  
MHFGRVAARDTILHGVRIRADDIVTLWHASGNRDERVFHRPEVFDLGRTP  
NRHLSFGHGPHYICIGSYLAKVEISELLIALRDLTSGFETTGEFQIRSNL  
LTGFATMPVRFPVDRAGLARDALDG

>CYP211C1 (2517995453) *Salinispora tropica* CNS416

VLDVEGLLTRLYSEQGRQDPYPVYADLHAQGAIAALAPRPEGQRVA AVAV  
GYDLVGAVLRDPEWSKQPPPGWMEQEILRTLQSSMMFINPPDHGRMRKVF  
AGTFTPRRLGTLEPVINRVADELDRMADAGPGEVDFVAEFAYPLPARVM  
AEFIGIPATELAWYRDRVDRIDAFLDVAGKTPERLAAANAAAAELRVFYA  
DLLARRRRTPGEDLISGLVEAVDAGGVQLTEDELINNLIVLFNASFVTTV  
YMLSNGLPVLLHEHPEVAAALADDPELTAGAIDEILRLQTPVHLLARAAPR  
DTVLGGVPI PQGQNVLLLI AAANRDP AHFPDPDRFDP RRP GPPSLAFGLG  
LHYCLGAAVSRLEGR LALPRLLSRFPRLRIMEQP VYSGSLFLRGIDKLSV  
SPGGRMHP

>CYP125A15 (2517995586) *Salinispora tropica* CNS416

MTEPRIPVGFDFTDPAVLERRVPREEFAELRRTAPVWWNVQPRGSAGFDD  
DGYWVVTRYADVMASRSDSTYSTRENTAIARFQPGTTRADLEMQRVIML  
NVDPPPEHTKLRAIVSRGFTPRAINALRGSLAERAERIVRDAAVRGTGDFV  
ADVACELPLQAI AELIGVPQHHRKVF DWSNQLIGYDDPAYGVDP L TAAA  
ELLAYAMEMANERQLNPSDDLVT KL VNAQIDGEHLTTDEFGFFVMLLAVA  
GNETTRNAITHGMLAFLEHPEQWELFKAERPRSAVEEII RWATPVNVFQR  
TALVDTTLGGQAI SAGQRVALFYGSANFDES VFEEPERFDITRSPNPHLG  
FGSGAHFCLGANLARLEIELIFHSIADHMPDIRKVAEPRRLRSGWINGI  
REMPVRYR

>CYP208A4 (2517995664) *Salinispora tropica* CNS416

VTVAAAGRTFSGPTGAALLRSLWQLGQDRLGLMTSAAARYGDAVRLGVGSR  
SLYFFNHPDHAKHVLADNSGNYTKGLGLVHARRALGDGLLTSEGELWREQ  
RRVIQPVFQAKRVAGQAHAVAEADRLIARLRARRGRGPVNLTDEFTALT  
LGVLGRTLLDANLDAFTTVGA AFEEMQNQAMFEMASMSMVMWVPLPQQL  
RFRRARRELERIVGRLVADRTARGE GTGADDALSRLIASTRDEPDGVAR  
RRMRDELVTLLLAGHETTASTLGWTFHLINQDPRVRVRLREEAIDVLGGR  
LPEYADLARLTYTKMVVSEAMRLYPPVWMLSRLARDADVVDGYVP PARAD  
VLICPYTLHRHPAFWPEPERFDPERFDPEVTTDRPRYAYVPFGAGPRFCV  
GNHLGLMEAVFVAMVSREFDLVAPVGQPVVAEPMLSLRVRGGLSMTVEP  
VS

>CYP154M1 (2517995692) *Salinispora tropica* CNS416

MRRRCPVVIDPAGTDIHAEGARIRANGSVSQVELPGGVLAWSVTGQQVAR  
KVLSDQRFSDPRKHWTDYLEGRIGQDFPLIGWVLMNDLTTAYGSDHSRL  
RKPCANAFTPRRVEALRPAVERAAVELLGELATVSPTESVDLKARYAHPL  
PSRVICDLFGVPEEDREEMLRGGEVNVDTRVSAEEAAAANVERWHQQMLDF  
IEEKRRNPGPDLTSDLIAAQQAEGSRLTDSEMVGTLHIMLATGTEPVKNL  
IGNAVFALLTHPEQLDLVRSGRAGWDDVIQETLRMQAPVAHL PFRFAVED  
VDIDGVTIRRGDPLLNVFAAIGRDPDVHGD TAAEFDITRADKEHLSFGHG  
VYRCIGQPLALREAEIALRMLFQRFPNLVLAVPPEEVTPQPTFIMNGLDT  
LPVLLKGRA

>CYP107AW1 (2517995954) *Salinispora tropica* CNS416

MESVTSTSAPPPVPYIADPYPALARIRANGPVSI LHSDEGIPMWVIARYR  
NVRAALADPRFGQDARRAQTLADNRVAGVTLGGDVIHMLNSDPPDHTRLR  
HLVQGAFTARRVAAMRPLVERITTSLLDGVGGRQTVDLVQDFAFPLPMLV  
ICELLGFPAEERDAYRSWSTAILTHND DPAAAFATALRDMTDYIEVQLRHR  
RARPGEDLLTELLAARDAGQLTDEIVGMVFLLLIGGHETT VNNLLGTATL

ALVRNPDQHRWLLANPHALSEAIDEFLRYESPVAMATLRFTTAPVTVDDV  
VIPAGELVLVSLGGANRDPDRFPDADRLILDRRDTHGLAFGHGLHRCLGA  
FLGKLEGEVALGALLGRYPGLTLAAEVRQLRWRDTIMLRGLESPLVSLHG

>CYP211B1 (2517996017) *Salinispora tropica* CNS416

MDASEAVALLMSPLGRIDPYPTYERLRAHGFPVVQTAAGFFVVTGYTEADT  
VLRNARLAFEVMDDELRDDVFPHWQDSPAMKSIARSMIRANPPNHGRMRR  
LAAGAFTPRRIAALREVVTQAQADELADEMIRAGRDGAPVDFMGSFAYPLP  
VAVICALLGVPAADWARFRGWASDLTAVLEPEITPQELTVADAGASELRD  
YFTELIAQRRRAPADDLTALVQTHDADGDRLSGEELLANLVLLLVAGFE  
TTTNLLGNGLVVLLAHPDSATALRDQPELAPGYVDELLRYDSPVQLTTRT  
VRESVLLAGVELPAGSWVLVLLGAANRDPERFTDPTRFDPGRAQSPPLSF  
GAGAHYCLGAGLARLEAQVAFPLLLRRLPELALAGEPTRRNRLTLRGYET  
LPVTVSAIAADHGTPAGVARGTP

>CYP107AX1 (2517997454) *Salinispora tropica* CNS416

MTSRPTAVFDQCLLRDPHSRYNALRDQAPVHHVLTDPGAPAWLVTRYNDV  
RAAFTDPRLSVDKRFSGTDGEHGSSLPPELDAHLLNRDPPDHTRLRLRLAA  
AACTPRRVADLHPAVERIVSTLLDGLAGHDRAELIGSLASPLPLQVMHEL  
LGLPTQANIDFRTWTNTLLSADANQPAQSRAAMANMRRFLIEQLAHKRAQ  
PGDDLLTGLLAAREDDDLTDELVAMVFLLMFAGYDNTAALIGTVTHAL  
LTNAELHEAVRGGSLALDELIDEVLRWNPAFPLAVRRFAREPITIAGQTI  
PAGDRIWLCLASANRDPAQFTQPDDELGIIGLRSHLSFGHGIHYCLGAPL  
ARLQTTIAVTSLNRRPFEMRLAVPAHDIRWRESFRLRGLIALPVYL

>CYP1005A1 (2517997727) *Salinispora tropica* CNS416

VSAVLFRSWTKTAGTHWPAITRVADQQGTEHLVVQHALVRQVLTQDQTY  
RPDNALDAVTPIPVAAALRVLAGHRFRLPPTLANNGGVSHPAIRALVADAL  
HPAKVAAQRFPWLTGLVAERVAAIRRTLDSGGSTDHLAELNADLPLLVLAR  
LVELPDAPVSAVKQFARAALFWAPLDADRQLALADEVGRFHQVLRFA  
DTGGGLAAALRATGHPPDVLVGALFFLLVAGQETTSQFLTLLHRLADEP  
TVRAALRADSVSVADVVEEGLRLEPPIVWRRVAAVDSTLGGSTVAAGTS  
VLLWLARAGRDPAVVPAPDEFPRPGQRGSRRLAFGAGAHRCCLGDQLARME  
AAVVVEQVTPLLDGVTVVRPPWYPDNLTFRMPDAFVVR

>CYP105AB2 (2517997972) *Salinispora tropica* CNS416

MTETASIAATTRTASGQLTDAEFFVQRCFPFTTPTEYEQIREESSIAKVRL  
KNGGEAWWIAGHELGRSVLADRRFSSDRRRDNFFVSTDPETRAQLQSQP  
TSMLGMDGAEHAQTRRALMGFTVRRMAGLRPRIQQIVDQHIDEMLATPQ  
RSVDLVEALSLPVPSLVICELLGVYADHDFQGLTGPLLRLHTTPPEVRL  
RIQEELNTYLGTLIDHKLTDPTDDLRSRQIAKHRDNGTFDRASMVSLAFL  
LLVAGHETTANMISLGVVGLLQHPDQLVLIKDDDPDKTPLAVEELLRYFTI  
ADSVTARVATEDVQLGDTTINAGDGVVISGLAADRDPTVFAEPDRDLER  
GARHHVAFGFQPHQCIGQTLARMELRIVFDTLFRHRIPTLRLAAPLDDIPF  
KSDAFVYGIEELPVAW

>CYP1004B1 (2517998671) *Salinispora tropica* CNS416

MTTSALAPRFDALDPNVVEDPYPEYARLRAAGPLCRLGPGSWGVTREFADV  
TNLQHDPRLGSEFPAGYHEISVGDGPASAFFQRVMLYRDPPDHIRLRLRM  
SGAFTPAVVRRLRSHIEDLVDELLAPALAAGRMDLVPELAYPLPVRVVC  
LMGIPPESTEDVRHHATNIGRAFTAVVPEQARTEADEAVSWLREHLGALL  
EQRRSHRGDDLRLSRLDAAESGDNLDAEIVDNTVFSFFAGFETTVHMIT

TGTAALLAHPDQLARLRADPSLVTTAVDEFRLRWDAPIQGTARYVREPIEI  
GGRTIRRGRVLVLMIGSANHDERRFAQPDRLDVGRQDNPHVAFGGGAHL  
LGAFIARMEGAVVFDRLARLAVLEPDGPTVREPNTFFRAYASVPVRIGDR

>CYP1004A1 (2517998675) *Salinispora tropica* CNS416

MRANTARPHLSAAFLATKDDPYPAYAELRARGPLTRAELGQWLVTGHGAV  
SALLRDGRLESRMPEYTRTLGLGDSPGVDFLHRIVLTRTPPEHTRLRRFI  
GRALGTPVVRRLHDRIAAATDALLEPALDRGRLDVVTELAVPLPVGVVCD  
LIGIPTGDRPAVLTRVTALAKVFDAANLSPADLADINTALPWLHDYFGDL  
LAVRRAGSGGPTLTREMYWEESASDRLAVADFVDNMLFLFHAGFETTMGLV  
SNGVAALLNNPEQLGRRLRADPALVPSAVEEFLRYDAPIQNVIRVARKPVE  
VAGQKIRAGRTVLLLLGAANRDEEVFADAERLDVGRDPNPHLGFGGGLHH  
CVGTALARLMAVVVFERLVDRVTVLGPAAPVRRRHASLSYDHLPLAVA  
AR

>CYP125G1 (2517998714) *Salinispora tropica* CNS416

MSTEVVSTGNRADIHPATYAAGVPYAEFARLRRDKPVSWVPEAALWRRS  
GEGRIISQGGPFWAVTTHEGVVAASRQPEVFSSGRQGAFLADPRTTADLE  
QARQLLVNMDAPQHARVRKLVTAFTTPRAIRALGDSVTAHARNLVERAVR  
QEECDVVADLAAELPLLVLADLLGLPREDRHLLYQWSNNLVGFDDPEYGG  
GDVEAYRKTFEAFQYALSVAGERRRAPREDLMTLLATSEVDGRRLTDRE  
FCNFWLLLVLVAGNETTRHLITGSVLALVDNPMQRERLVADDTLLPSAVDE  
LLRWVSPIMQFRRTAIVDTLTCGTPIAAGDKVVLWYTSANRDAAVFEAPD  
ELRLHRNPNPHLSFGMGPHFCLGAHLARLEARTMLRELAPHLSRFRLTGP  
VVRLESNFVNGVKSLLPGSFTGQ

>CYP107E3 (2517999187) *Salinispora tropica* CNS416

VTIDQEIRKYPFCESPGIGIDPTYGLLRSTEPLARVQLPYGEVSWLATRY  
EDVKTVLTDPRFSRAAAQGKDQPRTREEMTYEGIIIGLDPPDHTRLRKL  
KALTARRVNAIRADAQRIANEYVDEMIAGSPGDLVELFALPYPVTVICE  
LLGVPFEDRAQFRIWTEGLTSTSEQLMVYAEQLFGYMGKLVAQRREEPTD  
DLLGALVKARDEGDRLTEQELLSIAGVGLLLTGVEVTVSTHIPNFVYALLT  
HPELMAQLRADRSIVPAAVEELLRMIPLNPAAMFFRYAVEDVTLSGITVR  
AGEPVLVSLPGANRDPEVFENPETFDFTREQNPHVAFGHGPHHCLGAQLA  
RMELQVALHTVLDRFPDLSLADGDEGVSWKSGLLVRGPSRLLVAW

>CYP163B1 (2527070068) *Salinispora tropica* CNR416

VTAADTGRVSGESQTPAHTVDLADPATFANHDLTGFWQQLRDEEPIHWN  
PPTAGRRGFVVVSRYADILDVYRDDVTFTSERGNVLVTLLAGGDAGAGRM  
LAVTDGPRHAELRKLLLRALGPRVLAPVCAAVRTNTRQMIREAVTKGEC  
FASDIASRIPMMTISNLLGVPDADRAFLLSLTKTALSADDESISETESAM  
ARNEILLYFQDLMEFRRDHPGEDVVSMLVNSSIDGAPLSDDDIVLNCYSL  
IIGGETSRLTMIDSVNTLAAHPQQWRRLKDGQCEIDKAVDEVLRWASPS  
MHFGRVAARDTILHGVRIRADDIVTLWHASGNRDERVFHRPEVFDLGRTP  
NRHLSFGHGPHYICISYLAKVEISELLIALRDLTSGFETTGEFQIRSNL  
LTGFATMPVRFPVDRAGLARDALDG

>CYP154M1 (2527070702) *Salinispora tropica* CNR416

MRRRCPVVIDPAGTDIHAEGARIRANGSVSQVELPGGVLAWSVTGQQVAR  
KVLSDQRFKSKDPRKHWTDYLEGRIGQDFPLIGWVLMNLTAYGSDHSRL  
RKPCANAFTPRRVEALRPAVERAAVELLGELATVSPTESVDLKARYAHPL

PSRVICDLFGVPEEDREEMLRGGEVNVVDTRVSAAEEAAANVERWHQQMLDF  
IEEKRRNPGPDLTSDLIAAQQAEGSRLTDSEMVGTLHIMLATGTEPVKNL  
IGNAVFALLTHPEQLDLVRSRAGWDDVIQETLRMQAPVAHLPFREFVED  
VDIDGVTIRRGDPLLNVFAAIGRDPDVHGDAAEFDITRADKEHLSFGHG  
VYRCIGQPLALREAEIALRMLFQRFPNLVLAVPPEEVTQPQTFIMNGLDT  
LPVLLKGRA

>CYP208A4 (2527070730) *Salinispora tropica* CNR416

VTVAAAGRTFSGPTGAALLRSLWQLGQDRLGLMTSAARYGDAVRLGVGSR  
SLYFFNHDPDHAKHVLADNSGNYTKGLGLVHARRALGDGLLTSEGELWREQ  
RRVIQPVFQAKRVAGQAHAVAEADRLIARLRARRGRGPVNLTDEFTALT  
LGVLGRTLDDANLDAFTTVGAAFEEMQNQAMFEMASMSMVPWVPLPQQ  
RFRRARRELERIVGRLVADRTARGEETGADDALSRLIASTRDEPDGVAR  
RRMRDELVTLLLAGHETTASTLGWTFHLINQDPRVRVRLREEAIDVLGGR  
LPEYADLARLTYTKMVVSEAMRLYPPVWMLSRLARDADVVDGYVPV  
PARADVLICPYTLHRHPAFWPEPERFDPERFDPEVTTDRPRYAYV  
PFGAGPRFCVGNHLGLMEAVFVAMVSREFDLVAPVGQPVVAEPMLSLRVRGGLSMTVEP  
VS

>CYP125A15 (2527070808) *Salinispora tropica* CNR416

MTEPRIPVGFDFDTPAVLERRVPREEFAELRRTAPVWWNVQPRGSAGFDD  
DGYWVVTRYADVMASRSDTYSTRENTAIARFQPGTTRADLEMQRVIML  
NVDPPEHTKLRAIVSRGFTPRAINALRGSLAERAERIVRDAAVRGTGDFV  
ADVACELPLQAI AELIGVPQHRRKVFWDWSNQLIGYDDPAYGVDPLTAAA  
ELAYAMEMANERQINPSDDLVTKLVAQIDGEHLTTDEFGFFVMLLAVA  
GNETTRNAITHGMLAFLEHPEQWELFKAERPRSAVEEIIRWATPVNVFQR  
TALVDTTLGGQAI SAGQRVALFYGSANFDES VFEEPERFDITRSPNPHLG  
FGGSGAHFCLGANLARLEIELIFHSIADHMPDIRKVAEPRRLRSGWINGI  
REMPVRYR

>CYP211C1 (2527070941) *Salinispora tropica* CNR416

VLDVEGLLTRLYSEQRQDPYPVYADLHAQGAIAALAPRPEGQRVAAVAV  
GYDLVGAVLRDPEWSKQPPPGWMEQEILRTLQSSMMFINPPDHGRMRKVF  
AGTFTPRRLGLEPVINRVADELDRMADAGPGEVDFVAEFAYPLPARVM  
AEFIGIPATELAWYRDRVDRIDAFLDVAGKTPERLAAANAAAAELRVFYA  
DLLARRRRTPGEDLISGLVEAVDAGGVQLTEDELINNLI VLFNASFVTTV  
YMLSNGLPVLLHEPEVAAALADDPELTAGAIDEILRLQTPVHLLARAAPR  
DTVLGGVPI PQGQNVLLLLIAAANRDP AHFPDPDRFDPRRPGPPSLAFGLG  
LHYCLGAAVSRLEGRALPRLLSRFPRLRIMEQPVYSGSLFLRGIDKLSV  
SPGGRMHP

>CYP107AY1 (2527071010) *Salinispora tropica* CNR416

MRAELAPIPRSGARLGQEYDQLRNAGDVHQVLLPDSSLAWLVTNPKLVS  
RALTDPRLALNRRHSRGSWSGFALPPALDANLLNLDAPDHTRLRLRVGPAF  
SPQRVSA LRPRIRRTAEHLLDTLVATSGPVDLVTGYCTPLSVQVIADLMG  
VPEAGRADLRWTDTMLTSYPPDRDAIRQAVVELHGYVVDLIDTKRQQPG  
DDL LSALVTIEQDGDRLRDELTS LAFLILFAGYENTANLIAS TVLRLLD  
HGGLRGVQLPEAIEETLRLEPPAPA AAVRRFPTEEMTIGGATIPAGDIVLL  
SIAAATRGTAGNAARLAFGNP HFC LGAALARVEAEEALTVLARRLPDLA  
LALPVAQVRWRPTFRTHGPAELLVTW

>CYP107AW1 (2527071254) *Salinispora tropica* CNR416

MESVTSTSAPPPVPYIADPYPALARIRANGPVSILHSDEGIPMWVIARYR  
NVRAALADPRFGQDARRAQTLADNRVAGVTLLGGDVIHMLNSDPPDHTRLR  
HLVQGAFTARRVAAMRPLVERITTSLLDGVGGRQTVDLVQDFAFPLPMLV  
ICELLGFPAEERDAYRSWSTAILTHNDDPAAFATALRDMTDYIEVQLRHR  
RARPGEDLLTELLAARDAGQLTDDEIVGMVFLLLIIGGHETTVNLLGTATL  
ALVRNPDQHRWLLANPHALSEAIDEFLRYESPVAMATLRFTTAPVTVDDV  
VIPAGELVLVSLGGANRDPDRFPDADRLILDRRDTGHLAFGHGLHRCLGA  
FLGKLEGEVALGALLGRYPGLTLAAEVRQLRWRDTIMLRGLESPLVSLHG

>CYP211B1 (2527071555) *Salinispora tropica* CNR416

MDASEAVALLMSPGRIDPYPTYERLRAHGPVVQTAAGFFVVTGYTEADT  
VLRNARLAFEVMDDELRDDVFPHWQDSPAMKSIARSMIRANPPNHGRMR  
LAAGFTPRRIAALREVVTQADELADEMIRAGRDGAPVDFMGSFAYPLP  
VAVICALLGVPAADWARFRGWASDLTAVLEPEITPQELTVADAGASELRD  
YFTELIAQRRRAPADDLTALVQTHDADGDRLSGEELLANLVLLLVAGFE  
TTTNLLGNGLVLLLAHPDSATALRDQPELAPGYVDELLRYDSPVQLTTRT  
VRESVLLAGVELPAGSWVLVLLGAANRDPERFTDPTRFDPGRAQSPPLSF  
GAGAHYCLGAGLARLEAQVAFPLLLRRLPELALAGEPTRNRRLTLRGYET  
LPVTVSAIAADHGTPAGVARGTP

>CYP1005A1 (2527071860) *Salinispora tropica* CNR416

VSAVLFRSWTKTAGTHWPAITRVADQQGTEHLVVQTQHALVRQVLTQDQTY  
RPDNALDAVTPIPVAALRVLAGHRFRLPPTLANNGGVSHPAIRALVADAL  
HPAKVAAQRPWLTGLVAERVAAIRRTLDSGGSTDLHAELNADLPLLVLAR  
LVELPDAPVSAVKQFARAALFVWAPLDADRQLALADEVGRFHQVLRFEA  
DTGGGLAAALRATGHPPDVLVVGALFFLLVAGQETTSQFLTLLHRLADEP  
TVRAALRADSVSVADVVEEGLRLEPPIVTVRRVAAVDSTLGGSTVAAGTS  
VLLWLARAGRDPAVVPAPDEFPRPGQRGSRRHLAFGAGAHRC LGDQLARME  
AAVVVEQVTPLLDGVTVVRPPWYPDNLTFRMPDAFVVRR

>CYP107AX1 (2527073163) *Salinispora tropica* CNR416

MTSRPTAVFDQCLLRDPHSRYNALRDQAPVHHVLTDPDGAPAWLVTRYNDV  
RAAFTDPRLSVDKRFSGTDGEHGSSLPPELDAHLLNRDPPDHTRLRLRLAA  
AACTPRRVADLHPAVERIVSTLLDGLAGHDRAELIGSLASPLPLQVMHEL  
LGLPTQANIDFRTWTNTLLSADANQPAQSRAAMANMRRFLIEQLAHKRAQ  
PGDDLLTGLLAAREDDRLTDDELVAMVFLLMFAGYDNTAALIGTVTHAL  
LTNAELHEAVRGGSLALDELIDEVLRWNPAFPLAVRRFAREPITIAGQTI  
PAGDRIWLCLASANRDPAQFTQPDDELGIIGLRRSHLSFGHGIHYCLGAPL  
ARLQTTIAVTSLLNRFPEMRLAVPAHDIRWRESFRLRGLIALPVYL

>CYP105AB2 (2527073541) *Salinispora tropica* CNR416

MTETASIATTRTASGQLTDAEFFVQRCFPFTTPTEYEQIREESSIAKVRL  
KNGGEAWWIAGHELGRSVLADRRFSSDRRRDNFPFVSTDPETRAQLQSQP  
TSMLGMDGAEHAQTRRALMGFTVRRMAGLRPRIQQIVDQHIDEMLATPQ  
RSVDLVEALSPLVPVSLVICELLGVADHDFQGLTGPLLRLHTTPPEVRL  
RIQEELNTYLGLTIDHKLTDPTDDLRSRQIAKHRDNGTFDRASMVSLAFL  
LLVAGHETTANMISLGVVGLLQHPDQLVLIKDDPKTPLAVEELLRYFTI  
ADSVTARVATEDVQLGDTTINAGDGVVISGLAADRDPTVFAEPDRDLDER  
GARHHVAFGFGPHQCIGQTLARMELRIVFDTLFHRIPTLRLAAPLDDIPF  
KSDAFVYGIEELPVAW



>CYP125G1 (2527074094) *Salinispora tropica* CNR416

FCNFWLLLLVVAGNETTRHLITGSVLALVDNPMQRERLVADDTLLPSAVDE  
LLRWVSPIMQFRRTAIVDTELCGTPIAAGDKVVLWYTSANRDAAVFEAPD  
ELRLHRNPNPHLSFGMGPHFCLGAHLARLEARTMLRELAPHLSRFRLTGP  
VVRLESNFVNGVKSPLPGSFTGQ

>CYP1004A1 (2527074133) *Salinispora tropica* CNR416

MRANTARPHLSAAFLATKDDPYPAYAELRARGPLTRAELGQWLVTGHGAV  
SALLRDGRLESMPAEYTRLTLGDSPGVDFLHRIVLTRTPPEHTRLRRI  
GRALGTPVVRRLHDRIAAATDALLEPALDRGRLDVVTELAVPLPVGVVCD  
LIGIPTGDRPAVLTRVTALAKVFDAANLSPADLADINTALPWLHDYFGDL  
LAVRRAGSGGPTLTEMYWEESASDRLAVADFVDNMLFLFHAGFETTMGLV  
SNGVAALLNNPEQLGRLRADPALVPSAVEEFLRYDAPIQNVRVARKPVE  
VAGQKIRAGRTVLLLLGAANRDEEVFADAERLDVGRDPNPHLGFGGGLHH  
CVGTALARLMAVVVFERLVDRTVLGPAAPAVRRRHASLRSYDHLPLAVA  
AR

>CYP1004B1 (2527074137) *Salinispora tropica* CNR416

MTTSALAPRFDALDPNVVEDPYPEYARLRAAGPLCRLGPGSWGVTREFADV  
TNLQHDPRLGSEFPAGYHEISVGDGPASAFFQVRMLYRDPPDHIRLRRLM  
SGAFTPAVVRRLRSHIEDLVDELLAPALAAGRMDLVPELAYPLPVRVVC  
LMGIPPESTEDVRHHATNIGRAFTAVVPEQARTEADEAVSWLREHLGALL  
EQRRSHRGDDLRLSRLDAEESGDNLDAEIVDNTVFSFFAGFETTVHMIT  
TGTAALLAHPDQLARLRADPSLVTTAVDEFRLWDAPIQGTARYVREPIEI  
GGRTIRRGRVLVLMIGSANHDERRFAQPDRLDVGRQDNPHVAFGGGAHL  
LGAFLARMEGAVVFDRLARLAVLEPDGPTVREPNTFFRAYASVPVRIGDR

>CYP125A41 (2571107809) *Salinispora arenicola* CNH996B

MTEPRIPAGFDFTDPEVLAHVRVPREEFAELRRTAPVWWNAQPRGSAGFDD  
DGYWVVTRYADVMTVSRSDTYSTRENTAIARLRPDTTREDIEMQRVIML  
NVDPPHTKLRAIVSRGFTPRAINALRGSLAERAHIVRDAAVRGVGFV  
TDVACELPLQAI AELIGVPQHHRKVFWDWSNQLIGYDDPAYGTDPLTASA  
ELLAYAMEMAERQSPSDDLVTCLVNAQIDGELTTDEFGFFVMLLAVA  
GNETTRNAITHGMVAFLDNPEQWELFKAERP KSAVEEII RWATPVNVFQR  
TALVDTVLGGQAI SAGQ RVALFYGSANFDEAVFEDPERFDITRSPNPHLG  
FGGSGAHFCLGANLARLEIELIFNSIADHLPDIRKVAAPQRLRSGWINGI  
RQMPVRYR

>CYP211C1 (2571107958) *Salinispora arenicola* CNH996B

VVDVEELLTRYSAQGRQDPFPVYADLHAQGPIAALPPEPERRRVA AVAV  
GYDLVGAVLRDPEWSKAPPPGWTEQEILRTLQTSMMFINPPDHGRMRHVF  
AGTFTPRRLGALEPVVNRVADELDRMADAGAGGLDFVAEFAYPLPARVM  
AEFIGIPETELDWYRERVDVIDAFLDVAGKTPQRLAAANAAGAE LRAFYG  
ELLAHRRRTPEGEDLISGLLEAVDAGGVELTEDELVSNLIVLFNASFVTTV  
YMLSNGLPVLLAHPEVAAALATDPVLTAGAVDEILRLQAPVHLLARAAPR  
DTV LGGVPI PQGQNVLLLLIAAANRDP AHFPDPDRFDPRRSGPPSLAFGLG  
LHYCLGA AVSRLEGR LALPRLLSRFPRLRIMEQPVYSGSLFLRGIDKLSV  
SPGEGSTRE

>CYP211B2 (2571108288) *Salinispora arenicola* CNH996B

MDVSEAVAVLISPSGRLDPYPTYEQ LRAHG PVSRTTAGLFVVVTGYAEADM  
VLRDPRFVVLDDDLRDDVFPHWQDSPAIKSIARSMLRTNPPDHSRIRRLA  
AGAFTPRRVAAMREVVTAQADELVDEMIRAGRDGARVDFMDMFAYPLPVA  
VICALLGVPAADRSRFRRWAGDLTGILEPEITPEELAGADAGADELRDYF  
TGLIEQRRRAPADDLTALVQAHDADGDRLSGEELLANLVVLLVAGFETT  
TNLLGNGLVVLTRPEAAAAALRDEPD LAPGYVDELLRYDSPVQLTTRTVR  
ESVSFAGTELPAGSWLLVLLGAANRDP RRFDPARFDPWRAQSQPLSFGA  
GPHYCLGAGLARLEAQVAFPLLLRRLPELALAGRPSRRTRLTLRGYETLP  
ITVGAVTADRGT PAGVAPGTP

>CYP244A4 (2571108768) *Salinispora arenicola* CNH996B

MSTTTNTELTEAPETNMPVDPGLFDCMPDLIAAARVAPVVRIPYLG RHAW  
VVC DRELVKQALTHPKMGKDIALVPEWMRQPGLMVTAQPDPEYARAMIMS  
DGENHARIRRIHAPVLSRPNTERWGERVADKVEGF LDELSQAGSGGSTEV  
NVVTNYTHKIPLAFISEMLGLPPEAEHRLRGITDIMLYSSDYAARREAIG  
GLFGAVEDWVRNPADLRDGVITGLLAASDGPDAAVTEGEVIVWTLGMIIT  
GYETTGSLISTSLYEAIRRPPHERPKTDEDITAWIEETLRVHPPFPHPPTW  
RFPLEDIELGGYLI PKGAPVQVSI AAANRKPGE GADSFDAERRGHGHL SF  
GLGMHYCIGAPLVRLEAQIAVRGFLRRFPQARLSAETAVQWESEWMIRRM  
SVLPAVLS

>CYP245A7 (2571108772) *Salinispora arenicola* CNH996B

MPSATLPRFALTGWSRENIVNPYPVYQRYREVASVHRGEPGGDAPDTFYV  
FSYDEVVQVLSSNCFGRGRSLDAAKASVPVPAEQKALRAIVENWL VFM DP  
PRHTELRSLNRSFSPRIVTELRPRIARIAQELL SRLGQQVDVDLVESFA  
APLPILVISELLGIPEERRAWLRANAMALQEASSSRAGRDVDGYARAEVA  
AQEFTEYFREQVRLRRGRAGGDLITILANAQQRGAPVSLDAIVGTCVHLL  
TAGHETTTNSLAKAVLALREHPAVLDELRGADGLTDDAVEEFLRYDPPVQ  
AVTRWAHQD TTLGGYDIPRGSRVVALLGSANRDPARFPSPDVL D VRRPAD  
RHLSFGLGIHYCLGATLARAELEIGLQALLDGVPTLGYGTQHVDYADDLV  
FHGPSRLVLVNLGERCK

>CYP107AW7 (2571109023) *Salinispora arenicola* CNH996B

VETVTGTSTPPPVPYIADPYPTLARIRANGPVSI LHSDEGIPMWVIARYR  
DVRAALADPRFGQDARRAQALADNRVAGVT LGGDIVHMLNSDPPDHTRLR  
RHVQGAFTARRVAAMRPLVERITTSLLDGLTGRTTVDLVQDFAFFPLMLV  
ICELLGFPAEERNAYRSWSTAILTHDDDPAA FATALREMTDYIAVQLRIR  
QTQPGDDILTELLAARDAGQLTDDEIIGMVFLLLIGGHETT VNLGTATL  
ALMRNPDQHRWLLANQH ALPEAIDEFLRYESP VAMATLRFTTTPVAVDDV  
VIPAGELVLVSLGGANRDPDRFPDADRLILD RRD TGHLAFGHGLHRCLGA  
FLGKLEGEVALGALLRRHPRLALAAEVRQLRWRDTIMLRGLES LPVSLHG

>CYP166A4 (2571109828) *Salinispora arenicola* CNH996B

MTYAISFELPWARTDKFDPPAVFDALREQRPLARMRYPDGHVGWIVSSYE  
LVREVLGDPRFSHSCAVGHFPVTHQGQVIPTHPQIPGMFIHMDPPEHTRY  
RRLLTGEFTVRRTSRLTG HVEGVATEQIEVMREHGAPADLVATFARPLVL  
RVLSGLVGLPYGERDRYLHAVTLLHDAEADPAEAAAAYEQAGAYFDEVIE  
RRRRQPEDDLISTLVGDGELTGEELRNIVTLLLFAGYETTESALAVGMFA  
LLYHEDQLARLRADPTKIDAAIEELLRYLT VNYHTYRTASEDIELHGEV  
INKGDSVTVSLPAANRDPARFACPADLDIDRETSGHVAFGFGI HQCLGQN  
LARVELRAGLSALLRAFPNLR LAVPADEVPLRLQGSVF AVKNLPVCW

>CYP125A41 (2571107809) *Salinispora arenicola* CNH996B

MTEPRIPAGFDFTDPEVLAHVRVPREEFAELRRRTAPVWWNAQPRGSAGFDD  
DGYWVVTRYADVMTVSRSDTYSTRENTAIARLRPDTTREDIEMQRVIML  
NVDPPHEHTKLRAIVSRGFTPRAINALRGSLAERAHIVRDAAVRGVGDV  
TDVACELPLQAI AELIGVPQHRRKVFWDWSNQLIGYDDPAYGTDPLTASA  
ELLAYAMEMAERQSRSPSDDLVTCLVNAQIDGHELTDEFGFFVMLLAVA  
GNETTRNAITHGMVAFLDNPEQWELFKAERP KSAVEEII RWATPVNVFQR  
TALVDTVLGGQAI SAGQRVALFYGSANFDEAVFEDPERFDITRSPNPHLG  
FGGSGAHFCLGANLARLEIELIFNSIADHLPDIRKVAAPQRLRSGWINGI  
RQMPVRYR

>CYP208A12 (2571110450) *Salinispora arenicola* CNH996B

MTLDTITPRVPLGPPRTAALRMLLVMKRDRLGMLTSAAARYGDASRLPVG  
HKALWFFNHPRYAKHVLADNSANYHKGIGLVHARRALGDGLLTSEGLWR  
KQRKVIQPAFQSRRIAQQAGMIAEEAFALVERLRARAGAGPVELTAEITG  
LTLGVLGRSLLDADLAGFDSIGDSFATVQDQAMFELETINAVPMWIP LPR  
QIRFRARRRKLQAVVDTLVDGRAGNLANRVDVLSRLILSARGEADPRVGR  
ERLRDELVTLLLAGHETTASTLGWTL SLIDRHPGVWERLHAEAVEVLGDR  
LPEYDDLRLRLRYTVMVVEEAMRLFPPVWLLPRRALAPDTIGEYRVPANAD  
VVISPYTLHRHPEFWPNPERFDPERFAPGQAADRPRYAYLPFGAGPRFCV  
GNNLGMMEAVFVIALLCRHLRLTGVPGYRLVPEPMLSLRIRGGLPLVVRP  
VS

>CYP105BL2 (2571110549) *Salinispora arenicola* CNH996B

MSSHSAAPDPVTATPLHTLAPELTFPQFERSTPFPDPPQAYTELSGRCPV  
APVSMADGKPSWLITSFEGVRTTLSDPRFSSDMSHPGFNRTGKPVDDL  
KDTLGAMDGERHRYRRLMTGELTVRRAKAMRPVITRITDEALDQLAAAG  
PGADLVKHVAFVVP SRVACHLVGIP LSYELFTGMAATLMDSTSSDDQFA  
ALQNMVSYFDTLVTDRHHDRDDLGHMVRRYLATGELTRDMLIRLAWTT  
MAAGQETTAMHIGLVAALLRHPDQLELLRREPHLLPGAVDELMRYLPLI  
QFGIPRVATDDVEVDGQTVTAGEGVVALPPLANRDPVFERPDEL DVRRN  
ARQHLTFGYGPHQCPAHALARLELEVYGRLLERFPTLRLADSDADLKVQ  
DKDIMYRVSELAVTW

>CYP1005A1 (2571110589) *Salinispora arenicola* CNH996B

MTAGTRWPDVTRVADQSGTEHLVVTRHALVRQVLTQATYRPD NALEAVT  
PVPVAALRVLAGHRFRLPPTLANNGGVSHPAIRALVADALHPTKVAAQRP  
WLTGLVADRVATIRTTLDSSGPVDLYADLTADLPLLVLARLVELPDAPVN  
AVKQFARAAL ELFWAPLDADRQLALADEVGRFHQV LREFADTGGGLAAAL  
RATGHSPDVLVGALFFLLVAGQETTSQFL TLLHRLSGEPTIRAALRAGS  
ISVADVVEEGLRLEPPIV TWRRVA AVDSTLGGTTVAAGTSVLLWLARAGR  
DPAVVAAPDEF RFGQRGSRRLAFGAGAHRC LGDQLARMEAAVVVEQATP  
LLDGVTVVRPPWYPDNLTFRMPDAFVVRR

>CYP107AY2 (2571110692) *Salinispora arenicola* CNH996B

MTAEPTPIPRSGTRLGPEYDQLRKTGDVHQVLLPDASLAWLV TNPEVAAR  
ALADPRLALNRNRSRGWSGFALPPALDANLLNDAPDHTRLRLRVGP AF  
SRQ RVAALRPGIRRAAEHLLDTLVATSGPTDLVTGYCNPLSVQVIADLMG  
VPEAGRTNLRAWTDMLTSYPPDRDAIRQAVTELHG YVVDLIDIKQQQPG  
DDL LSALVTIEQDGDRLSRDELTS LAFLILFAGYENTANLIASAVRWLLD

HGGLNVVPISEAIEGTLRHEPPAPVAIRRFPTEDIIIGGV TIPAGDTVLL  
SIAAATRGADGNAARLAFGNPHYCLGAALARVEAEEALTVLARRLPGLT  
LAVPPAQVRWRPTFRTHGPAELLVGW

>CYP163B21 (2571110985) *Salinispora arenicola* CNH996B

MNLSLDLTD PATFVENDPHEFWRQVRREQPTYWHPSTAGRPGFWV VAGYE  
EVRACYGNWKQLSSARGNVLDVLLHGGDSAGGKMLAVTDRPRHRHLRNL  
LRAFSPRVMG EVVRKVEERAAELIRT VTERGSFDFATEVAEHI PMNTICD  
LLSIPPNDRKQLLVWTKAALSSADPQSDTLDALEARNEIVLYLMDLAFER  
RSTPGNDVISMIAGAEVDGRPLTPEEVALNCYSLILGGDESSRITAISSV  
LAFTEYPDQWHALREGTVSVETTTEELLRWATPGMHFARTALCDLSIQGQ  
RIQTGDIVTFWNTSANNDET VFAAPRRLDLSRDPNKHLTLGHGPHFCVGA  
ALGRAELGALLRALIASVGEIEIHGAPQRIYSNLLHGYSSLPVTFHPLST  
GKAT

>CYP154M5 (2571111264) *Salinispora arenicola* CNH996B

VEQSCP YKLDVTGRDVHAEGEAIRARGPVAQVELPGGVQGWSVTGYQAAR  
QVLADPRFAKDPKKWPAYTSGAIPP NWPLIGWLLMDNM TNDGADHQRLR  
KLVS HGFTPRQVERTRPLIVKIVNDLLDGLSSAGPDEVVDLKGRFATPLP  
ARVICDMFGVPEALRASVLRGAQVNV TSSISGEEAEANVEQWHRELLELV  
EAKREKPD EDDMASLLIAAKEEDGSTLTQEEVVGTLHLMLGAGSETLMNAL  
SYAVLGMLS NPGQYEMVRNGTSSWDDVIEETLRAQAPVAQLPLRYATEDV  
AVGGAVIKAGDPVLMGFTAIGRDP AVHGETAGDYDITREDKTHLSFGHGV  
HFCLGAPLARLELKIALPALFERF PNM TLAVRPDQLEPQGT FIMNGHREL  
PVRLGQPATVLA

>CYP105CT1 (2571111281) *Salinispora arenicola* CNH996B

MNSPNHMPADRSLTAPASGCPMALS RGRVGLDVADEISELRDGGRLGRIT  
TAFGQEATLITRYDEVRAQMADSVV FNVAGVPSPPALVDGGFDTESVRRR  
RTVGNLIMLDPPEHTRLRRMVAAWFTTRRVERLRPRVVEIIDAALDEMER  
SGPPVDLVAMFAKTVPITVICELIGVPEELRERYRRRAERAVSASAVSTP  
LDELRLREAGWVSRELIEYHRENPSDDIIGMLLREHGTDSHDDGITDDE  
LVGLANALLIAGHETTTQMLSMGTLALLRHPDQLALLRDDPSIVAGAVEE  
LLRYVGV LHGGFVRVATRDTRLGGHRIHAGELVVPALTAANRDPRL LTDG  
DRLDITRPPTSHVAFGHGVHFCIGAPLARMELREAFPALLRRFPGLRLAV  
PDSELEFTQGT TVYSLRGLPVTW

>CYP105G5 (2571111362) *Salinispora arenicola* CNH996B

LTIETTETPAADD SLRAPLPRQFMQRDDPSKLPALAAALAEQSPVGRSTL  
PDGDPFWMVSGYDEARAVLSDPRFSSDRFRYHPRFKKLSGQLGERLRNDK  
ARAGSFINMDPPEHTRYRKLLTGQFTVRRMRQLTVRIEQIVTEQLDVMLA  
EGNSADLVSAFAVPVPSLMICELLGVRYEDRTEFQRRAGLLQTDLP IKQ  
AVENLEAQRAFMQRLVTDKRTTPADDMISGLVHHAGAEPPLTDDELVGIA  
TLLLFAGLD TTASMLGLGMFMLLQRP EQMAVLRDDPSRIGDAVEELLRYL  
TVVSTGLFRFAKEDVVLGDEHIPAGSTVVVSLMAANRDGRHWPEPETLDV  
TRVRSSHLAFGHGVHQCLGQQ LARIELTVGITELL CRLPNVRLAVPPADV  
PLRNDMITYGVHRLPILWGTP

>CYP107Q4 (2571111363) *Salinispora arenicola* CNH996B

MTTTAETSAETIDLFSPEVVADPFGWYARLREETGPNTGT LNIGTMMGGP  
EMWLVTREYEDVRQVLTDPRFLTNP PADSPLEDIRAGVFRRLDFPPDLIPW

MANLLNVSDGEDHTRLRKLVSYALTAHRIGKLRPRVEKITADLLDKLAED  
GKDGSPVDLVEEYCYPLPVTVICELVGIDEPDRPHWRAWGDSMATMNGER  
IPTTLVKCIELARELIAKRRAEPQDDLVTALVQAQAEQDNRVSDDEIIGI  
LFSLVTAGHQTTTTYLIGNSVILLLENPDQLARLKENPSMWPQAVRELQRL  
GPIQFAQPRFPSEDIELGGVTIPRGAPVAPLLLAANTDPRRFPDPNKLI I  
DRLAVGSEHGLGFGKGIHRCLGQHLLAYQEAQVALQGLFTRFPDLTLAVPR  
EEIPWILRPGFTRTRTLPLKLV

>CYP105AB36 (2571111465) *Salinispora arenicola* CNH996B

MTEAASSRLTDTEFPVQRQCPFAEPVEYEQIREQSSIAMVRLTGGGEAWW  
ISGHEQGRAVLADRRFSSDRKANFPFVSTD PATRKRLHAQPLSMISMDG  
AEHAQARRALIGEFTVRRLAALRPRIQQIVDQCIDEMLTDDQHCVDLVKA  
LSLPVPSLVICELLGVPYDDHDFQEHATLVRRNTAPEVRQHCVDELNA  
YLGALIDRKLANPDDDLLGRQIARQHODGTFDRASIVSLAFLLLVAGHET  
TANMISLGVVGLLQHPDQLTMIKKDPDKVPLAIEELLRFFTIVDSVTSRV  
ATEDVRFGDTTINAGDGVVVSGLSADWDPTVFADPDRLDLERGARHHIAF  
GFGPHQCIGQNLARLELQIVFDTLFRRIPTLRLAAPLDKIPFKTDAAIYG  
ARELPVAW

>CYP105CP2 (2571111611) *Salinispora arenicola* CNH996B

MTKSMPVQDLPAFFIPRECPYRPSAQHVSLRSGGPMKVRLYNGRTAWLV  
TDSA HARAVLS DYRRVSIKPYHGNYP LLNEEF EKVVDSGYADVLFGVDPP  
EHTRQRMIMPSFTLRRTAVLRPDIQRIVDDKLDEM MRHGAPGDLVTEFA  
QPVPMSMVSFLLGVPWEDHEEFETPAHKLFVPELAEEATEL GAYLERLI  
QKKEQPGGTPGGTGLLDD LIRDHLRAGALSRDELVHIAMAMLVAGTDTT  
NVISLGT LALLDNPDQWAALRDNPDELIPGAVEEILRYTSLIEAFARVAV  
SDIELNGAVIKEGEGILISSAGVNFDPALAPDPGRFDIRRPPRPSFSFSH  
GIHRCPGDNLARLELEIAFRSLVTRMPNLR TATPIDQIPSNNDGTLQRL  
YELPVVW

>CYP105CN1 (2571111613) *Salinispora arenicola* CNH996B

MAAPAPQATQSTTPHPPSYPLPRECPYRPSAGTARLRDAGPVSTVRLYDG  
RTAWLV TGAAEARALLADSRVSNRADFPNYPVMDERHLSMRATREMAREE  
EGGF AAALFGMDPPEHTRQRQLLLPRFTVRQVAARRPAIQRIVDEHLDAM  
EANGSPADLVSAFATPVPTMVVCTHLGVPYQDRTRFEP AVAGLFEPDRAD  
AAMAELTAYLHQ LIETRQSEPGDGVIDHLIANHLRPGAIDRAELVAIASA  
ILVAGTVTTSSAIALGTLALLTAPGQYAALVDNPDLPVGAVNEILRYLSL  
VEQLARVATEDIEIGGKLIRAGDGIIVSFAAGNLDPNVTTHPDRLDVALP  
PTNH LAFSHGIHHCIGQNLALLELDIAFRALVSRFPTLRLAVPAEQ LPTY  
FAGDVPR LACL PVTW

>CYP107FS2 (2571111614) *Salinispora arenicola* CNH996B

MPVPQGEQNLTTTEVFADPKALFATLGSRQPLHRISLPDGM PAVLVTGNRE  
ARQALSDPRLVRSITAAAPELHKYHPLASDDYALSRHMLFADPPDHGRMR  
KLVSTAFTRRRVEQMRPRIQQITDDLIDVIAAKGEADLVETLALPLPIAV  
ISEMLGVFPFADRSEFERHAEVLTGINASSGFD AIIAAGRWFDEYLAGLVQ  
QRRREPQDDLISGM LAAQDKGDRLTDVELRSNALLLLSAGFETT VNLVAN  
GLLALLRHPEAMAALRSEPNLMTTAVDELLRYDSPVSCV TYHFAQEPVEI  
GGFEIRSGEHVVIAAAAANHDPTVFADPSRLDLRREGSGQILSF SHGIHF  
CLGAPLARLEGEIAFGTVLRRLAGRLAVPTDSL VVKASFVLHRLERLPV  
TFTPD RAPNPIDSVHTV

>CYP247A7 (2571111746) *Salinispora arenicola* CNH996B

VRLTPGAARDIDLDSVNLFDLDLYTSGDPHPIDVDMRAQSPLHHQVLADG  
REFWVS TRYDDVCRVLGDYREFTSERGT VVTHLGEDDIAAGKLLTSTDPP  
RHTQVRRRAIGAKLTARAVASWQDRIRDAIVRFLEPALDGDTFDLAEQALL  
LPAIVTGPLLGPIDRWQELVQLTAMVTAPSDPHFQHGSEAATLAISHHE  
LVITYVTEWVKQRRSAGGGDGSLLDHLMSVRVGGAPLTDEEIALDGYSILL  
GANVTTPTHVSGTVLALIERPEQFEKAQADPSLLANLVEEGLRWTSAAACN  
FMRYALNDTRIGGGTVPAGGAVVAWIGSANRDESYFPDPHQFDITRSGAN  
RQVAFGFGPHYCIGAPLARMTLGIFFEELVQRFGSIELAGEPQHLSYFI  
AGMTHLP IVAQKRKTP

>CYP248A2 (2571112055) *Salinispora arenicola* CNH996B

VLADAVTAFDPTAVDVRRDPYPSYHWLLRHDPVHRGAHQVWYVS RFADVR  
AVLGDERFARTGIRRFWTDLVGPGLLSQIVGDIILFQDEPDHGRLRGVVG  
PAFSPSALRRLEPTIEATVNDLLRPARALGAMDVVADLAYPLALRAVLEL  
LGLPAGDANAVGRWSRAVGRTLDRGATAEDMRRGHAAITEFADYVERALA  
ERREDGADLLALMLAAHRSQMLSRNEIVSTVVTFIFTGHETVASQLGNGL  
LSLLDHPEQLELVRRQPHLVPQAVEECLRFDPVQSNTRQLAADVELHGR  
RLRRDDVVVVLAGAANRDPGRYDRPDELDIRRDPVPSMSFGAGMRYCLGS  
YLARLQLRTALGAMVALPDLRLVCNPNELAYQPRTMFRGLTRLPVAFTPA  
G

>CYP105W2 (2571112063) *Salinispora arenicola* CNH996B

MTGYQDRPTGDQPGAPVPSGSTDPGIGAFPLPRRCPFSPPAEYARLRAEH  
PVVRLPMLGGDTAWVVS RHADVQVLSDPRMSADRRRPGF PKFAPTEGQ  
RQASFANFRPPLNWLDPPEHAICRRQIVDEF SVRRVRQSRALVERVVDTH  
LDALTAGAPGADLVSTFAYPVPSQVICEVLGVPYGEHEFFERRSTLMFRR  
STPADERARYAREIRDFLDMVVTDKERRPGDDVLSRLLYRQRSAGGMDHE  
AVVSMAFVLLVAGHVTTSNMLALSVLALLTHPARLARLRAE PERFPAAVE  
ELLRYFTVVEAATARTTTAEIMIGGVTTAAGEGVVALGQAANRDP RVFEH  
PDEFDPDRDARAHLAFGHGRHICPGQHLARLEMEVALSRLFRRLPGLRLT  
MEVSDLPLKEDSNIFGLYALPVAW

>CYP107NH1 (2571112462) *Salinispora arenicola* CNH996B

MTEPVVSLMDPEFWNDPVSAYERLRGSGPLIRMGLPGVPPVWLVTSCHEV  
KSALSDPRFVVDAAANVP GHGPGIVDQMM AASGMPDEF RDYMTNMMFTDG  
KDHSRLRLRLVTPGFSARRIRAMRPRVDQIAEELVESLAEKGSGELIADFS  
TPLTTTVICELIGVDRADQAQMGAWMHDYTTGERVVSGRAMVNYTRDLIE  
RRRAEPADDMISAMIRSGDEAGDRLSDAEI IAMALLLINAGHHSTAQFIP  
NAVLVLLDHPEQLARLRAEPGQLPGAMDELMRLANPVPIATPRYATEDME  
FAGVAVRRGEALTGSLEAANFDPERFPAPRQLDTGRDLGRGDGHL SFGAG  
PHYCPGAALARLEGEIALDHLLLRDSLRLAVERDEVYVDVSLGLRMLS  
SLPVRL

>CYP247A8 (2571112467) *Salinispora arenicola* CNH996B

VRLTPEAGRPVALGSIDLFD PDLFASGDPHSVWDV MRSEAPLHRQVLPDG  
RVFWSVTRYEDVCRVLGDHRAFTSERGT VFTQLGADDIAAGKLLTSTDPP  
RHTEVRRRAIGGRLTARAVAHWQDLVRRAVVRFLEPALDGGCWDLAERAQQ  
LPLIIAGSLLGPIDSDWEKLVQLTGMVTAPSDSMFGLGSEAATLAIAHHE  
IFDYLSDLVRRRRSAGTGGDSLLDHLMTVRAGAGPLPDEEVVYDSYSLIL  
GANATTPHTLSGIVLTLVERPEQCDKVRADPSLIPSMVEEGLRWTSAAACN  
FMRYATVDTRLTG GTVPAGEAVVAWIASANRDESQFADPHTFDVTRGENR  
HVAFGFGPHYCIGAPLARMTARIFFEELFRRFWSIEIDGEPQHLSNFIA  
GMTHLPVVTRKRAQV

>CYP1051A1 (2571112745) *Salinispora arenicola* CNH996B

MATDAPITRARTVPAWKALPAAVRDTHRALVDVGNWSDGDVVRVSLGVSR  
PYLVTNPAHVQEVLHERAAIYPRGDDTALWRSVRKLVGDGILAEGDAAW  
SRRVLAPMFRPARINAMVDTMADAIAGAVDDLHEAATAGTPIDVGRELSR  
IVCSAIMRVFFADRITVRDALRIMKAQETIVTAMAPRILAPLVPWWIPMP  
GDRRFRAAVRSIDDILLPVLQRQAQRQPDGDDLLSRLVRARADDGRALSE  
KMRDDLVSMAVTTETSTVVLTWLWPLLANHPDVANRLYDEIDRVVGGG  
PVRGDHLAELTYTRMVLDELLRLYPAGWILPRRAATTDVLGGVRINKGAT  
VILSPYVTQRMATAWWGPTAEAFDPERFAAGREAADGRHRYAYYPFGVGMH  
RCLGEHLFNLEAILIVATLLSRFRFALTDTSMPGVKVAASTRPARTVEMI  
LKPVAPVPAR

>CYP211C1 (2562074143) *Salinispora arenicola* CNH996

VVDVEELLTRLISAQGRQDFFPVYADLHAQGPIAALPPEPERRRVAAVAV  
GYDLVGAVLRDPEWSKAPPPGWTEQEILRTLQTSMMFINPPDHGRMRHV  
AGTFTPRRLGALEPVVNRVADELDRMADAGAGGLDFVAEFAYPLPARVM  
AEFIGIPETELDWYRERVDVIDAFLDVAGKTPQRLAAANAAGAELEAFY  
ELLAHRRRTPEGDLISGLLEAVDAGGVELTEDELVSNLIVLFNASFVTT  
YMLSNGLPVLLAHPEVAAAALATDPVLTAGAVDEILRLQAPVHLLARAA  
DTVLGGVPIPPQGQNVLLLIAAAANRDPAHFPDPDRFDPRRSGPPSLAFGL  
LHYCLGAAVSRLEGRLLPRLLSRFPRLRIMEQPVYSGSLFLRGIDKLSV  
SPGEGSTRE

>CYP125A41 (2562074292) *Salinispora arenicola* CNH996

MTEPRIPAGFDFTDPEVLAHRVPREEFAELRRTAPVWWNAQPRGSAGFDD  
DGYWVVTRYADVMTVSRSDTYSTRENTAIARLRPDTTREDIEMQRVIML  
NVDPPHEHTKLRAIVSRGFTPRAINALRGSLAERAHIVRDAAVRGVGDV  
TDVACELPLQAIABELIGVPQHRRKVFWDWSNQLIGYDDPAYGTDPLTASA  
ELLAYAMEMAEERQSPSDDLVTKLVAQIDGEHLTTDEFGGFFVMLLAVA  
GNETTRNAITHGMVAFLDNPEQWELFKAERPKSAAVEEIIRWATPVNVFQ  
TALVDTVLGGQAIASAGQVALFYGSANFDEAVFEDPERFDITRSPNPHLG  
FGGSGAHFCLGANLARLEIELIFNSIADHLPDIRKVAAPQRLRSGWINGI  
RQMPVRYR

>CYP211B2 (2562074960) *Salinispora arenicola* CNH996

MDVSEAVAVLISPGRLDPTYTYEQLRAHGPPVSRTTAGLFVVVTGYAEADM  
VLRDPRFVVLLDDDLRDDVFPHWQDSPAIXIARSMLRTNPPDHSRIRRLA  
AGAFTPRRVAAMREVVTQADELVDDEMIRAGRDGARVDFMDMFAYPLPVA  
VICALLGVPAADRSRFRRWAGDLTGILEPEITPEELAGADAGADELRDYF  
TGLIEQRRRAPADDLTALVQAHDADGDRLSGEELLANLVVLLVAGFETT  
TNLLGNGLVVLLTRPEAAAALRDEPDLAGYVDELLRYDSPVQLTTRTVR  
ESVSFAGTELPAGSWLLVLLGAANRDPRRFPDPARFDPWRAQSQPLSFGA  
GPHYCLGAGLARLEAQVAFPLLLRRLPELALAGRPSRRTRLTLRGYETLP  
ITVGAVTADRGTAGVAPGTP

>CYP166A4 (2562075386) *Salinispora arenicola* CNH996

MTYAISFELPWARTDKFDPPAVFDALREQRPLARMRYPDGHVGVIVSSYE  
LVREVLGDPRFSHSCAVGHFPVTHQGQVIPTHPQIPGMFIHMDPPEHTRY  
RRLLTGEFTVRRTSRLTGHEGVATEQIEVMREHGAPADLVATFARPLVL  
RVLSGLVGLPYGERDRYLHAVTLLHDAEADPAEAAAAAYEQAGAYFDEVIE

RRRRQPEDDLISTLVGDGELTGEELRNIVTLLLFAGYETTESALAVGMFA  
LLYHEDQLARLRADPTKIDAAIEELLRYLTVNQYHTYRTASEDIELHGEV  
INKGDSVTVSLPAANRDPARFACPADLDIDRETSGHVAFGFGIHQCLGQN  
LARVELRAGLSALLRAFPNLRRLAVPADEVPLRLQGSVFAVKNLPVCW

>CYP244A4 (2562075503) *Salinispora arenicola* CNH996

MSTTTNTELTEAPETNMPVDPGLFDCMPDLIAAARVAPVVRIPYLGRHAW  
VVCDELVKQALTHPKMGKDIALVPEWMRQPGLMVTAPDPPEYARAMIMS  
DGENHARIRRIHAPVLSRNTERWGERVADKVEGFLDELSQLAGSGGSTEV  
NVVTNYTHKIPLAFISEMLGLPPEAEHRLRGITDIMLYSSDYAARREAIG  
GLFGAVEDWVRNPADLRDGVITGLLAASDGPDAAVTEGEVIVVTLGMIIT  
GYETTGLSLISTSLYEAIIRPPHERPKTDEDITAWIEETLRVHPPFPHTW  
RFPLEDIELGGYLIPKGAPVQVSIAAANRKPGEAGDSFDAERRGHGHLSE  
GLGMHYCIGAPLVRLEAQIAVRGFLRRFPQARLSAETAVQWESEWMIRRM  
SVLPAVLS

>CYP245A7 (2562075507) *Salinispora arenicola* CNH996

MPSATLPRFALTGWSRENIVNPYPVYQRYREVASVHRGEPGGDAPDTFYV  
FSYDEVVQVLSSNCFGRGRSLDAAKASVPVPAEQKALRAIVENWLVFMDP  
PRHTELRSLLNRSFSPRIVTELPRPRIARIAQELLSRLGQQVDVDLVESFA  
APLPILVISELLGIPEERRAWLRANAMALQEASSSRAGRVDVGYARAEVA  
AQEFTEYFREQVRLRRGRAGGDLITILANAQQRGAPVSLDAIVGTCVHLL  
TAGHETTTNSLAKAVLALREHPAVLDELRGADGLTTDAVEEFLRYDPPVQ  
AVTRWAHQDRTLGGYDIPRGSRVALLGSANRDPARFPSPDVLVRRPAD  
RHLSFGLGIHYCLGATLARAELIIGLQALLDGVPTLGYGTQHVDYADDLV  
FHGPSRLVLVNLGERCK

>CYP107AW7 (2562075735) *Salinispora arenicola* CNH996

VETVTGTSTPPPVPYIADPYPTLARIRANGPVSILHSDEGIPMWVIARYR  
DVRAALADPRFGQDARRAQALADNRVAGVTLLGGDIVHMLNSDPPDHTRLR  
RHVQGAFTARRVAAMRPLVERITTSLLDGLTGRTTVDLVQDFAFPPLPMLV  
ICELLGFPAEERNAYRSWSTAILTHDDDPAAAFATALREMTDYIAVQLRIR  
QTQPGDDILTELLAARDAGQLTDEIIGMVFLLLIGGHETTVNLLGTATL  
ALMRNPDQHRWLLANQHALPEAIDEFLRYESPVAMATLRFTTTPVAVDDV  
VIPAGELVLVSLGGANRDPDRFPDADRLILDRRDTGHLAFGHGLHRCCLGA  
FLGKLEGEVALGALLRRHPRLALAAEVRQLRWRDTIMLRGLESPLVSLHG

>CYP105BL2 (2562076171) *Salinispora arenicola* CNH996

MSSHSAAPDPVTATPLHTLAPELTFPQFERSTFPDPPQAYTELSGRCPV  
APVSMADGKPSWLITSFEGVRTTLSDPRFSSDMSHPGFPNRTGKPVDDL  
KDTLGAMDGERHRYRRLMTGELTVRRAKAMRPVITRITDEALDQLAAAG  
PGADLVKHVAFVVPSPRVACHLVGIPLSDYELFTGMAATLMDSTSSDDQFA  
ALQNMVSYFDTLVTDREHHRDRLDLGHMVRRYLATGELTRDMLIRLAWTT  
MAAGQETTAHMIIGLVAALLRHPDQLELLRREPHLLPGAVDELMRYLPLI  
QFGIPRVATDDVEVDGQTVTAGEGVVALPPLANRDPVAFERPDELDVRRN  
ARQHLLTFGYGPHQCPAHALARLELEVYGRLLERFPTLRLADSDADLKVQ  
DKDIMYRVSELAVTW

>CYP208A12 (2562076896) *Salinispora arenicola* CNH996

MTLDTITPRVPLGPPRTAALRMLLVMKRDRLGMLTSAAARYGDASRLPVG



HKALWFFNHPRYAKHVADNSANYHKGIGLVHARRALGDGLLTSEGLDWR  
KQRKVIQPAFQSRRIAQQAGMIAEEAFALVERLRARAGAGPVELTAEITG  
LTLGVLGRSLLDADLAGFDSIGDSFATVQDQAMFELETNLAVPMWIPLPR  
QIRFRRARRKLQAVVDTLVDGRAGNLANRVDVLSRLILSARGEADPRVGR  
ERLRDELVTLLLAGHETTASTLGWTLSLIDRHPGVWERLHAEAVEVLGDR  
LPEYDDLRLRLRYTVMVVEEAMRLFPPVWLLPRRALAPDTIGEYRVPANAD  
VVISPYTLHRHPEFWPNPERFDPERFAPGQAADRPRYAYLPFGAGPRFCV  
GNNLGMMEAVFVIALLCRHLRLTGVPGYRLVPEPMLSLRIRGGPLPLVVRP  
VS

>CYP1005A1 (2562076978) *Salinispora arenicola* CNH996

MTAGTRWPDVTRVADQSGTEHLVVTRHALVRQVLTQATYRPDNAMEAVT  
PVPVAALRVLAGHRFLRPPTLANNGGVSHPAIRALVADALHPTKVAAQRP  
WLTGLVADRVATIRTTLDSSGPVDLYADLTADLPLLVLARLVELPDAPVN  
AVKQFARAALFELFWAPLDADRQLALADEVGRFHQVLRREFADTGGGLAAAL  
RATGHSPDVLVGALFFLLVAGQETTSQFLTLLHRLSGEPTIRAALRAGS  
ISVADVVEEGLRLEPPIVTVRRVAAVDSTLGGTTVAAGTSVLLWLARAGR  
DPAVVAAPDEFPRPGQGRSRRHLAFGAGAHRCCLGDQLARMEAAVVVEQATP  
LLDGVTVVRPPWYPDNLTFRMPDAFVVR

>CYP163B21 (2562077256) *Salinispora arenicola* CNH996

MNLSLDLTDPATFVENDPHEFWRQVRREQPTYWHPSTAGRPGFWVAGYE  
EVRACYGNWKQLSSARGNVLDVLLHGGDSAGGKMLAVTDRPRHRHLRLNM  
LRAFSPRVMGEVVRKEAAELIRTVTERGSFDFATEVAEHI PMNTICD  
LLSIPPNDVISMIAEVDGRPLTPEEVALNCYSLILGGDESSRITAISV  
LAFTEYPDQWHALREGTVSVETTTEELLRWATPGMHFARTALCDLSIQGQ  
RIQTGDIVTFWNTSANNDETVFAPRRLDLSRDPNKHLTLGHGPHFCVGA  
ALGRAELGALLRALIASVGEIEIHGAPQRIYSNLLHGYSSLPVTTFHPLST  
GKAT

>CYP154M5 (2562077577) *Salinispora arenicola* CNH996

VEQSCPYKLDVTGRDVHAEGEAIARARGPVAQVELPGGVQGWSVTGYQAAR  
QVLADPRFAKDPKKWPAYTSGAIPPNWPLIGWLLMDNMTNDGADHQRLR  
KLVSHGFTPRQVERTRPLIVKIVNDLLDGLSSAGPDEVVDLKGRFATPLP  
ARVICDMFGVPEALRASVLRGAQVNVTTSSISGEEAEANVEQWHRELLELV  
EAKREKPEDMASLLIAAKEEDGSTLTQEEVVGTLHLMLGAGSETLMNAL  
SYAVLGMLSNPGQYEMVRNGTSSWDDVIEETLRAQAPVAQLPLRYATEDV  
AVGGAVIKAGDPVLMGFTAIGRDPVHGETAGDYDITREDKTHLSFGHGV  
HFCLGAPLARLELKIALPALFERFPMNTLAVRPDQLEPQGTIFIMNGHREL  
PVRLGQPATVLA

>CYP105CT1 (2562077594) *Salinispora arenicola* CNH996

MNSPNHMPADRSLTAPASGCPMALSRGRVGLDVADEISELRDGGRLGRIT  
TAFGQEATLITRYDEVRAQMADSVVFNVAGVPSPPALVDGGFDTESVRRR  
RTVGNLIMLDPPEHTRLRRMVAAWFTTRRVERLRPRVVEIIDAALDEMER  
SGPPVDLVAMFAKTVPIITVICELIGVPEELRERYRRRAERAVSASAVSTP  
LDELRLREAGWVSRELIEYHRENPSDDIIGMLLREHGTDSDHDDGITDDE  
LVGLANALLIAGHETTTQMLSMGTLALLRHPDQLALLRDDPSIVAGAVEE  
LLRYVGVLLHGGFVRVATRDTRLGGHRIHAGELVVPALTAANRDPRLTLDG  
DRLDITRPPTSHVAFGHGVHFCIGAPLARMELREAFPALRRFPGLRLAV  
PDSELEFTQGTTVYSLRGLPVTW

>CYP105G5 (2562077675) *Salinispora arenicola* CNH996

LTIIETTETPAADDSLRAPLPRQFMQRDDPSKLPALAAAEQSPVGRSTL  
PDGDPFWMVSGYDEARAVLSDFRFSDDRFYHPRFKKLSGQLGERLRNDK  
ARAGSFINMDPPEHTRYRKLLTGQFTVRRMRQLTVRIEQIVTEQLDVMLA  
EGNSADLVSAFAVPVPSLMICELLGVRYEDRTEFQORRAAGLLQTDLPKQ  
AVENLEAQRAFMQRLVTDKRTTPADDMISGLVHHAGAEPPLTDDELVGIA  
TLLLFAGLDTTASMLGLGMFMLLQRPEQMAVLRDDPSRIGDAVEELLRYL  
TVVSTGLFRFAKEDVVLGDEHIPAGSTVVVSLMAANRDGRHWPEPETLDV  
TRVRSSHLAFGHGVHQCLGQQQLARIELTVGITELLCLPLNVRSLAVPPADV  
PLRNDMITYGVHRLPILWGTP

>CYP107Q4 (2562077676) *Salinispora arenicola* CNH996

MTTTAETSATIDLFSPEVVADPFGWYARLREETGPNTGTNLNIGTMMGGP  
EMWLVTTRYEDVRQVLTDPRFLTNPADSPLEDIRAGVFRRLDFPPDLIPW  
MANLLNVSDGEDHTRLRKLVSALTAKHRIGKLRPRVEKITADLLDKLAED  
GKDGSPVDLVEEYCYPLPVTVICELVGIDEPDRPHWRAWGDSMATMNGER  
IPTTLVKCIELARELIAKRAEPQDDLVLTALVQAQAEQDNRVSDDEIIGI  
LFSLVTAGHQTTTYLIGNSVILLLENPDQLARLKENPSMWPQAVRELQRL  
GPIQFAQPRFPSEDIELGGVTIPRGAPVAPLLAANTDPRRFPDPNKLI  
DRLAVGSEHGLGFGKGIHRCGLGHLAYQEAEEVALQGLFTRFPDLTLAVPR  
EEIPWILRPGFTRTRTLPLKLV

>CYP107AY2 (2562077701) *Salinispora arenicola* CNH996

MTAEPTPIPRSGTRLGPEYDQLRKTGDVHQVLLPDASLAWLVTNPEVAAR  
ALADPRLALNRRNSRGGWSGFALPPALDANLLNLADPDHTRLRRLVGPAP  
SRQ RVAALRPGIRRAAEHLLDTLVATSGPTDLVTGYCNPLSVQVIADLMG  
VPEAGRTNLRATDTMLTSYPPDRDAIRQAVTELHGYYVDLIDIKQQQPG  
DDLALSVTIEQDGDRLSRDELTSALFLILFAGYENTANLIASAVRWLLD  
HGGLNVVPISEAIEGTLRHEPPAPVAIRRFPTEDIIIGGV TIPAGDTVLL  
SIAAATRGADGNAARLAFGNPHYCLGAALARVEAEALTVLARRLPGLT  
LAVPPAQVRWRPTFRTHGPAELLVGW

>CYP105AB36 (2562077817) *Salinispora arenicola* CNH996

MTEAASSRLTDTEFPVQRQCPFAEPVEYEQIREQSSIAMVRLTGGGEAWW  
ISGHEQGRAVLADRRFSSDRKANFPFVSTDPATRKRLHAQPLSMISMDG  
AEHAQARRALIGEFTVRRLAALRPRIQQIVDQCIDEMLTDDQHCVDLVKA  
LSLPVPSLVICELLGVPPYDDHDFQEHATLVRRNTAPEVRQHCVDELNA  
YLGALIDRKLANPDDDLGRQIARQHGDGTFDRASIVSLAFLLLVAGHET  
TANMISLGVVGLLQHPDQLTMIKKDPDKVPLAIEELLRFFITIVDSVTSRV  
ATEDVRFGDTTINAGDGVVVSGLSADWDPTVFADPDRLDLERGARRHHIAF  
GFGPHQCIGQNLARLELQIVFDTLFRRIPTLRLAAPLDKIPFKTDAAIYG  
ARELPVAW

>CYP107FS2 (2562077871) *Salinispora arenicola* CNH996

MPVPQGEQNLTTTEVFADPKALFATLGSRQPLHRISLPDGMFAVLVTGNRE  
ARQALSDPRLVRSITAAAPELHKYHPLASDDYALSRHMLFADPPDHGRMR  
KLVSATFTRRRVEQMRPRIQQITDDLIDVIAAKGEADLVETLALPLPIAV  
ISEMLGVPPFADRSEFERHAEVLTGINASSGFDAIIAAGRWFDEYLAGLVQ  
QRRREPQDDLISGMLAAQDKGDRRLTDVELRSNALLLSAGFETTVNLVAN  
GLLALLRHPEAMAALRSEPNLMTTAVDELRLYDSPVSCVTYHFAQEPVEI  
GGFEIRSGEHVVIAAAAANHDPTVFADPSRLDLRREGSGQILSFSGIHF  
CLGAPLARLEGEIAFGTVLRRLAGRLAVPTDSLWVKASFVLRRLERLPV

TFTPDRAPNPIDSVHTV

>CYP105CN1 (2562077872) *Salinispora arenicola* CNH996

MAAPAPQATQSTTPHPPSYPLPRECPYRPSAGTARLRDAGPVSTVRLYDG  
RTAWLVTGAAEARALLADSRVSNRADFPNYPVMDERHLSMRATREMAREE  
EGGFAAALFGMDPFEHTRQRQQLLPRFTVRQVAARRPAIQRIVDEHLDAM  
EANGSPADLVSAFATPVPTMVVCTHLGVFPYQDRTRFEPVAVAGLFEPDRAD  
AAMAELTAYLHQLIETRQSEPGDGVIDHLIANHLRPGAIDRAELVAIASA  
ILVAGTVTTSSAIALGTLALLTAPGQYAALVDNPNDLVPGAVNEILRYLSL  
VEQLARVATEDIEIGGKLIRAGDGIIVSFAAGNLDPNVTTHPDRLDVALP  
PTNHLAFSHGIHHCIGQNLALLELDIAFRALVSRFPTLRLAVPAEQLPY  
FAGDVPRLACLPTW

>CYP105CP2 (2562077874) *Salinispora arenicola* CNH996

MTKSMPVQDLPAFPIPRECPYRPSAQHVSLRSGGPMKVRLYNGRTAWLV  
TDSAHAARAVLSDYRRVSIKPYHGNYPLLNEEFKVVDSGYADVLFGVDP  
EHTRQRQMIMPSFTLRRTAVLRPDIQRIVDDKLDMMRHGAPGDLVTEFA  
QPVPSPMVSFLLGVFWEDHEEFETPAHKLFPVPELAEAEATTELGAYLERLI  
QKKEQPGGTPGGTGLLDDLRDHLRAGALSDELVHIAMAMLVAGTDTT  
NVISLGLTALLDNPQWAALRDNDELIPGAVEEILRYTSLIEAFARVAV  
SDIELNGAVIKEGEGILISSAGVNFDPALAPDPGRFDIRPPRPSFSFSH  
GIHRCPGDNLARLELEIAFRSLVTRMPNLRATATPIDQIPSNNDGTLQRL  
YELPVVW

>CYP247A7 (2562078127) *Salinispora arenicola* CNH996

VRLTPGAARDIDLDSVNLFDLDLYTSGDPHPIWDMRAQSPLHHQVLADG  
REFWSVTRYDDVCRVLGDYREFTSERGTVVTHLGEDDIAAGKLLTSTDPP  
RHTQVRRRAIGAKLTARAVASWQDRIRDAIVRFLEPALDGDTFDLAEQALL  
LPAIVTGPLLGIPEWDQELVQLTAMVTAPSDPHFQHGSEAATLAISHHE  
LVITYVTEWVKQRRSAGGGDGSLLDHLMSVRVGGAPLTDEEIALDGYSILL  
GANVTTPTVSGTVLALIERPEQFEKAQADPSLLANLVEEGLRWTSACN  
FMRYALNDTRIGGGTVPAGGAVVAWIGSANRDESYFPDPHQFDITRSGAN  
RQVAFGFGPHYCIGAPLARMTLGIFFEEELVQRFSGSIELAGEPQHLSYFI  
AGMTHLPIVAQKRKTP

>CYP105W2 (2562078265) *Salinispora arenicola* CNH996

MTGYQDRPTGDQPGAPVPSGSTDPGIGAFPLPRRCFFSPPAEYARLRAEH  
PVVRLPMLGGDTAWVVSRAHADRQVLS DPRMSADRRRP GPFKFAPTTEGQ  
RQASFANFRPPLNWLDPPEHAICRRQIVDEFVRRVRQSRALVERVVDTH  
LDALTAGAPGADLVSTFAYPVPSQVICEVLGVYPYGEHEFFERRSTLMFRR  
STPADERARYAREIRDFLDMVVTDKERRPGDDVLSRLLYRQRSAGGMDHE  
AVVSMAFVLLVAGHVTTSNMLALSVLALLTHPARLARLRAEPPERFPAAVE  
ELLRYFTVVEAATARTTTAEIMIGGVTTAAGEGVVALGQAANRDP RVFEH  
PDEFDPDRDARAHAFGHGRHICPGQHLARLEMEVALSRLFRRLPGLRLT  
MEVSDLPLKEDSNIFGLYALPVAW

>CYP248A2 (2562078273) *Salinispora arenicola* CNH996

VLADAVTAFDPTAVDVRRDPYPSYHWLLRHDPVHRGAHQVWYVS RFADVR  
AVLGDERFARTGIRRFWTDLVGPGLLSQIVGDIILFQDEPDHGRLRGVVG

PAFSPSALRRLEPTIEATVNDLLRPARALGAMDVVADLAYPLALRAVLEL  
LGLPAGDANAVGRWSRAVGRTLDRGATAEDMRRGHAAITEFADYVERALA  
ERREDGADLLALMLAAHRSQMLSRNEIVSTVVTFIFTGHETVASQLGNGL  
LSLLDHPEQLELVRRQPHLVPQAVEECLRFDPVQSNTRQLAADVELHGR  
RLRRDDVVVVLAGAANRDPGRYDRPDELDIRRDPVPSMSFGAGMRYCLGS  
YLARLQLRTALGAMVALPDLRLVCNPNELAYQPRTMFRGLTRLPVAFTPA  
G

>CYP107NH1 (2562078695) *Salinispora arenicola* CNH996

MTEPVVSLMDPEFWNDPVSAYERLRGSGPLIRMGLPGVPPVWLVTSCHEV  
KSALSDPRFVVDAANVPGHHGPGIVDQMMASGMPDEFRDYMTNMMFTDG  
KDHSRLRRLVTPGFSARRIRAMRPRVDQIAEELVESLAEKSGGELIADFS  
TPLTTTVCICELIGVDRADQAQMGAWMHDTTGERVVSGRAMVNYTRDLIE  
RRRAEPADDMISAMIRSGDEAGDRLSDAEIIAMALLLINAGHHSTAQFIP  
NAVLVLLDHPEQLARLRAEPGQLPGAMDELMRLANPVPIATPRYATEDME  
FAGVAVRRGEALTGSLEAANFDPERFFAPRQLDTGRDLGRGDGHLSTFGAG  
PHYCPGAALARLEGEIALDHLLLRDSLRLAVERDEVYVDVSLGLRMLS  
SLPVRL

>CYP247A8 (2562078700) *Salinispora arenicola* CNH996

VRLTPEAGRPVALGSIDLFDPDFLASFDPHSVWDVMRSEAPLHRQVLPDG  
RVFWSVTRYEDVCRVLGDHRAFTSERGTVFTQLGADDIAAGKLLTSTDPP  
RHTEVRRRAIGRLTARAVAHWQDLVRRRAVVRFLPALDGGCWDLAERAQQ  
LPLIIAGSLLGIPDSDEKLVQLTGMVTAPSDSMFGLGSEAATLAIHHE  
IFDYLSDLVRRRRSAGTGGDSLDDHMLTVRAGAGPLPDEEVVYDSYSLIL  
GANATTPHTLSGIVLTLVERPEQCDKVRADPSLIPSMVEEGLRWTSACN  
FMRYATVDTRLTGGTVPAGEAVVAWIASANRDESQFADPHTFDVTRGENR  
HVAFGFGPHYCIGAPLARMTARIFFEELFRRFWSIEIDGEPQHLSNFIA  
GMTHLPVVTRKRAQV

>CYP1051A1 (2562079004) *Salinispora arenicola* CNH996

MATDAPITRARTVPAWKALPAAVRDTHRALVDVGNWSDGDVVRVSLGVSR  
PYLVTNPAHVQEVLHERAAIYPRGDDTALWRSVRKLVGDGILAEGDAWAA  
SRRVLAPMFRPARINAMVDTMADAIAGAVDDLHEAATAGTPIDVGRELSR  
IVCSAIMRVFFADRITVRDALRIMKAQETIVTAMAPRILAPLVPWWIPMP  
GDRRFRAAVRSIDILLPVLRQAQRQPDDGDDLLSRLVRARADDGRALSE  
KRMRDDLVSMAVTTETSTVVLTWLWPLLANHPDVANRLYDEIDRVVGGG  
PVRGDHLAELTYTRMVLDELLRLYPAGWILPRRAATTDVLGGVRINKGAT  
VILSPYVTQRMATAWWGPTAEAFDPERFAAGREAADGRHRYAYYPFGVMH  
RCLGEHLFNLEAILIVATLLSRFRFALTDTSMPGVKVAASTRPARTVEMI  
LKPVAPVPAR

>CYP244A5 (2516451488) *Salinispora pacifica* CNT138

MSATTNAELGEAPETSMPVDPGLFDCMPDLIAAARIAPVVRIPYLGRHAW  
VVCDELVKQALTHPKMGKDITLVPEWMRQPGLMVTAQPPPEYARAMIMS  
DGENHARIRRIHAPVLSRPNTERWGEQVATKVEGFLELSKAAAGSNAEV  
DVVTNYTHKIPLAFISEMLGLPPAAEHRLRSITDIMLYSSDYAARREAIG  
GLFGAVEEWVRNPDGLRDGVITGLLAGSDGPGAAVTEGEVIVWTLGMIIT  
GYETTGSLLISTSLYEALRRPPHERPRTDEDITAWIEETLRVHPPFPHPWTW  
RFPLEDIELGGYLIPKGAPVQVSIAAANRQPGEGADSFDTERRGHGHLSTF  
GLGMHYCIGAPLVRLEAKIAVRGFLRRFPQARLSADAQWESEWMIRRM  
SFLPAVLS

>CYP245A11 (2516451492) *Salinispora pacifica* CNT138

MSSTTLPRFTLTGWNREDIVNPYPVYRRYREVA AVHRGEAGGDAPETFYV  
FSYDQVAQVLSSSCFGRGRSLDATAASVPVPADQKALRAVVENWLVFMDP  
PRHTELRSLLNRSFSPRIVTGLRPRIARIAQELL SRLGRQVETDLVEGFA  
APLPILVIAELLGIPAERHGWLRTNALALQEASSSRARRDTAGYARAEAA  
AQEFTEYFREQVRLRRGSAGDDLLTILANAQLRGAPVSLDAVVGTGVHLL  
TAGHETTTNSLAKAVLALQAHPAVLEELRGADGLTADSIEEF LRYDPPVQ  
AVTRWTHQDTTLGGWEVPRGSRVVAL LGSANRDPARFPLPDALDVHRPAD  
RQLGFGLGIHYCLGATLARAELEIGLQTLLNGLPTLGYPAQYVDYADDMV  
FHGPSRLILVNPGERFCQ

>CYP107AW6 (2516451579) *Salinispora pacifica* CNT138

VETVTGTSAPPPVPYIADPYPTLARIRANGPV SILHSDEGVPMWVIARYR  
EVRAALADPRFGQDARRAQALADNRVAGVT LGGDIVHMLNSDPPDHTRLR  
RHHVQGAFTARRVAAMRPLVERITTSLLDGLAGRKTVDLVQDLAFPLPMLV  
ICELLGFPAEERNAYRSWSTAILTHDDDP AVFATALREMTDYIAVQLRIR  
RSRPGDDLLTELLAARDAGQLTDDEIVGMVFLLLIGGHETTVNLLGTATL  
ALLRNPDQHRWLLANRHALPEAIDEFLRYESP VAMATLRFTTTPTVTDDV  
VIPAGELVLVSLGGANRDPDRFPDADRLILDRRDTGHLAFGHGLHRCLGA  
FLGKLEGEVALGALLRRHPKLALATEVRQLQWRDTIMLRGLES LPPVSLHG

>CYP107AX9 (2516451594) *Salinispora pacifica* CNT138

MTAQPA PVFDQRLLRDPHRRYNALRDQAPVHRVRTPDGAPAWLVTRYDDV  
RAAFTDPRLSVDKRFSGTDGEHGSSLPPELDAHLLNRDPPDHTRLRLRLAA  
AAFTPRRVADLRPAVEKTVSTLLDGLAGNDHAELIGSLASPLPLQVMHEL  
LGLPTQTSVDFRTWTNTLLSADANQPAQSR SAMANMRRFLIEQVAHKRAQ  
PGDDLLTGLLCVREDDDGLTDDELVAMLFLLMFAGYDNTAALIGNAIHAL  
LTNVELAEAVRTGSLAVDELVDGVLRWNPSFPLAVRRFA REPIT IAGQTI  
PAGDRIWLCLASANRDPAHFTEPDEIGIADMRRPHLSFGHGIHYCLGAPL  
ARLQTTVAVASLFDRFPGIRLAVPVQDIQWRESFRLRGLVALPVSL

>CYP208A21 (2516451606) *Salinispora pacifica* CNT138

MTTTSIDRRRPPGPPRAAALSMLLTMSRDR LGMMTAAARAYGDAAWLPVG  
HKALYFFNHPDYAKHVLTDNSDNYTKGIGLVHARRALGDGLLTSEGELWR  
EQRRVIRPSFRSGRAPDQASVIAEEVASLVERLRARAGGPPVNVVTEFTG  
LTLGVLGR TLLDVDLTALATVGDAFAAVQDQAMFELVTL SAVPTWIPLTR  
QRRFRRARAELE RIVDDLVARRGDVSGRDDVLSRLILSTGAEPDARVRRQ  
RLRDELVTLLLAGHETTASTLGWTLYLIDRHPPVRERLRAEAAEVLGDRL  
PAYRDLPLRFTTMVVQEAMRLYPPVWLLPRRSRRADRVGPYWPAGSDV  
VVSPYTMHRHPGFWEPEPDRFDPLRFDPRNAADRPRYAYLPFGAGPRVCVG  
SNLGMTEAVIAVAMLCRELRLVRVPTHAAVPEPMLS LRIRGGLPMSVHLA  
D

>CYP154M16 (2516451623) *Salinispora pacifica* CNT138

MPDRCPVLDP SGRDIHAEADRLRAQAPAVKVELPGGVHAW SITSYDVVRR  
LLLDNRVTKNARNHWPKF INDEIPPDWEMISWVAMDNMVTAYGKHLVRLR  
RLIAKAFTAQRVETVRPQVEKLVD ELLDGLAAETGEVVDLREKFCYPLPA  
LLIADLIGMTEQQRAQTAKAMDLMVDTTVSPEQAQAILTGWRTAMDELIA  
AKRREP GKDIASDLIAARD DENGGLTDSELTD TIFAILGAGSETTINFL  
DNAVTALVTHPGQLELVRSGRAGWDDVIDEVL RVQCPLASLPLRYAVTDI  
ELDGVTIPQGDPI LINYAAAGRDPALHGDTAGEFDVTRENKEHVSFGHGP  
HYCLGAGIARLVATIGLSRLFERFPDLRLAVPAEELQPLPTFIMNGHRAL  
PVRLVPAPAAATAV

>CYP211C6 (2516451858) *Salinispora pacifica* CNT138

VPDIEGLLARLYSAQGRQDPYPVYADLHAKAAIAALEPRPERQRVAAVAV  
GYDLVAAVLRDPEWFKQPPPGWRDQEILRILQSSMMFINPPDHGRMRHVF  
AGTFTPRRLGALEPVINRVTDLELLDRMADAGPGEVDFVAEFAYPLPARVM  
AEFIGIPATELAWYRERVDRVDAFLDVAGKTPERLAAAANAAGAE LRFFYR  
ELLAHRRRTPEGEDLISGLVEAVDAGGVELTEDELISNLIVLFNASFVTTV  
YLLSNGLPVLLAHPEVAAAALTSSPELAAGAVDEILRLQTPVHLLARAAPR  
DTVLGGVSIPOGQONVLLLIAAANRDP AHFPDPDRFDPRRSGPPSLAFGLG  
LHYCLGAAVSRLEGRALAPRLLSRFPRRLRILEQPVYSGSLFLRGIDKLSV  
SPGGREHP

>CYP125A66 (2516451993) *Salinispora pacifica* CNT138

MTEPRIPVGFDFDTPAVLERRVPREEFAELRRTPVWVNAQPKGSAGFDD  
DGYWVVTRYADVMASRDSETYSTRENTAIARFQPGTTQADREMQRVIMI  
NVDPP EHTKLRAIVSRGFTPRAINALRGSLGERAERIVRDAAGRGAGDFV  
TDVACELPLQAI AELIGVPQHRRKVFWDWSNQLIGYDDPAYGVDPLAASA  
ELLYAMEMAHERQRNPSDDLVTKL VNAQIDGEHLTADEF GFFVMLLAVA  
GNETTRNAITHGMLAFLENPEQWELFKAERPRSAVEEII RWATPVNVFQR  
TALVDTTLAGQAI SAGQRVALFYGSANFDES VFEEPERFDITRSPNPHLG  
FGGSGVHFCLGANLARLEIELIFNSIADHMPDIRKVADPQRLRSGWINGI  
RELPVQYH

>CYP1005A8 (2516452658) *Salinispora pacifica* CNT138

VSAVLFRSWTKTAGPHWPAVTRVADQQGTEHLVVTEHELVRQVLTDQVTY  
RPDNALDAVTPIPV PALRVLAGHGFRLPPTLANNGGVSHPAIRALVADAL  
HPAKVAAQR PWLTKLVAERVA AIGATLDSGGSADLHAELNADLPLLVLAR  
LVLELPDAPVS AVKQFARA ALELFWAPLDADRQLALADEVGRFHQVLRIFA  
DTGGGLAAALRTTGHPDPVLVGALFFLLVAGQETTSQFLTLLLHRLAGEP  
TVRAALRDGGVSVANVVEEGLRLEPPIV TWRRVA AVDSTLGGTAVPAGTS  
VLLWLARAGRDP AIVPAPDEF RFGQRGSRRLAFGAGAHRC LGDQLARME  
AAVVVEQAAPLLDGISVVRAPWYPDNLTFRMPDAFVIRR

>CYP211B14 (2516452863) *Salinispora pacifica* CNT138

MDASEAVALLMSPPGRLDPYPTYERLRAHGPPVPTAAGFFVVTGYTEADA  
VLRNPRFGVMDDEERDGVFPHWQDSPAMMSISQSMIRANPPDH SRMRRLA  
AGVFTPRRVAALREVVAQADELIDEMIRAGRGGAPVDFLG SFAYPLPVT  
VICALLGVPAADWAQFRRWASDLTG VLEPEITPQELAIADAGATELRDYF  
TELIAQRRRDPTDDLTTALVQTHDADGDRLSGEELLANLVLLLVAGFETT  
TNLLGNGLFVLLTHPESATALRDQPELAPGYVDELLRYDSPVQLTTRTVR  
ESVPLAGVELPAGSWLLVLLGAANRDPARFTD PARFDPGRAQSPPLSFGA  
GAHYCLGAGLARLEAQVAFPLLLRRLPELALAGEPIRRNRLTLRGYETLP  
VTVGAVAVDHGTPAGAALSTP

>CYP105AB34 (2516453251) *Salinispora pacifica* CNT138

MTETASITTPGTSSTATSGPGSGEVDTEFPVERGCPFSTPAEYEQIREH  
SPLTKVRLTTGREAWWIAGHELARAVLADRRFSSDRRDNF PFVSTD PET  
RKQLQDQPTSM LGMDGA EHAQTRRALMG EFTVRRMAGLRPRIQQIVDQHI  
DEMLSSEQRSADLVEALS LPVPSLVICELLGV PYADHDFQARS GPLVRH  
HTPSKVRVRIQEELNTYLGG LIDRKVADPTDDL LSRQIAKQHAAGTFDRT  
SLVSM AFLLLIAGHETTANMISLG VVGLLQHPDQLAMIKDDPEKTPPAVE  
ELLRYFTITD TVTARVATEDVQLGDTTITAGDGVVISGLAADHDPTVFTD  
PNQIDLERGARHHVAFGFGPHQCIGQTLARLELQIVFDTLFRR IPTLRLA  
APLDDIPFKSDAIIYGAEELPVAW

>CYP107AY7 (2516455216) *Salinispora pacifica* CNT138

MRAEPAPIPRSGARLGQEYDQLRKTGDVHQVLLPDTSLAWLVTSPELVSR  
ALADPRLALNRKHSRGGWSGFALPPALDANLLNLDAPDHTRLRRLVGPAP  
SPQORVAALRPRIERTAEELVDVTVVATGSPVDLVTGYCTPLSVQVIADLLG  
VPEARRTDLRAWTDMLTSYPPDRDAIRQAVVELHGYVVNLIEAKRQRP  
DDLLSALVATEQEGDRLTRDELTSIAFLILFAGYENTANLIASTVLRLLG  
HGSLRGARASEAIEETLRLEPPAPAAIRRFPIEEMTIGGATIPAGDTVLL  
SIAAATRGTDGNSARLAFNGPHFCLGAALARVEAEEAITVLARRLPSLA  
LAAPGAPVRWRPTFRTHGPAELLVTW

>CYP1278A4 (2516455594) *Salinispora pacifica* CNT138

MPSPVGAVVHPNPYPYAAAMVAERPFHFDEQLDWTVAASAAAAQAVLAAP  
GCRVRPPHEPVPQGITGTGPDVFGNLVRMTDGEFQHRKAIIVTQTLGAI  
DRSAVAATAMQRRARQVLNDSVRTPYEQLMFELPAQVVATLCGLDPAAGGE  
ATRLVGHFVQCIPATASPEQQQRAAQAAGLQELLGPKLDDTQHGLLGEL  
VRMATHVGWTDRAPLLANGIGFLSQTYDATAALMGNTLLALSQQECELPT  
SEMALQRFVREVIRHDAPIQNTRRFTATPIRHGDVEVPAGQAVLVLLAAA  
NRDPAANPDPHMFADRTTPNVFTFSAGAHHCGETLAVTIVTTVVEQLL  
RVGFDPAKLSTRVTYRPSPNARIPVLTE

>CYP105BL6 (2516455659) *Salinispora pacifica* CNT138

MSSHPAAAPGPETATPLHTLAPELTFPQFERATPFDPPEAYTELSGRCPV  
APVRMADGKPSWLI TSFEGVRAALSDPRLSSDM SHPGFPNRTGKPVDDL  
KDTLGAMDGERHRYRRLTGELTVRRAKAMRPVITQITDEALDQLAAAG  
PGADLVKHVALVVP SRVACHLVGIP LSEYELFTGMAAKLMEATSSADQIA  
ALQDMVSYFDKLVTDREHHRDDLLGHMVRRYLSTGELTREMLIRLAWTT  
MAAGQETTAHMI GLGVAALLRHPDQLELLRREPHLM PGAVDELMRYLPMI  
QFGIPRVAMDDVEVDGQTVTAGEGVVALPPLANRDP AVFERPDELDVRRN  
ARQHLSFGYGP HQCPAHALARLELEVYSRLLERFPTLRLADGDADLKVQ  
DEDIMYNVSELAVAW

>CYP107AX4 (2515991134) *Salinispora pacifica* CNT001

MTSQPAPVFDQLLLLRDPHRRYNALRDEAPVHHIRTPDGAPAWLVTRYDDV  
RAAFIDPRLSVDKRLSSTDGEHGSSLPPELDAHLLNRDPPDHTRLRLRLAA  
AAFTPRRVADLRPAVERIVSTLLDGLVGHDQAELIGSLASPLPLQVMQEL  
LGLPTQTSVDFFRRWTNTLLSADANQPAQSR SAMANMRRFLVEQLAHKRAR  
PGDDLLTGLLAAREDDRLTDDELVAMFLMLMFAGYDNTAALIGNVVHAL  
LTNTELPAAVTRGSLALDELVDGVLWRNPSFPLAVRRFAREPIITAGQTI  
PAGDRIWLCLASANRDPAQFTAPETLGTTGMRRPHLSFGHGIHYCLGAPL  
ARLQTTVAVTILLDRFP GIRLAVPAHDIRWRESFRLRGLVALPVFL

>CYP107AW7 (2515991149) *Salinispora pacifica* CNT001

VETVTGTSTPPFPYIADPYPTLARIRANGPVSILHSDEGIPMWVIARYR  
DVRAALADPRFGQDARRAQALADNRVAGVTLGGDIVHMLNSDPPDHTRLR  
RHVQGAFTARRVAAMRPLVERITTSLLDGLTGRTTVDLVQDFAFPPLMLV  
ICELLGFPAEERNAYRSWSTAILTHDDDPAAFATALREMTDYIAVQLRIR  
QTRPGDDILTELLAARDAGQLTDEIIGMVFLLLIGGHETT VNLGTATL  
ALMRNPDQHRWLLANQH ALPEAIDEFLRYESP VAMATLRFTTTTPVAVDDV  
VIPAGELVLVSLGGANRDPDRFPDADRLILDRRTGHLAFGHGLHRC LG  
FLGKLEGEVALGALLRRHPRLALAAEVRQLRWRDTIMLRGLES LPVSLHG

>CYP125A65 (2515991951) *Salinispora pacifica* CNT001

MTEPRIPVGFDFTDPAVLERRVPREEFAELRR TAPVWWNVQPRGSAGFDD  
DGYWVVTRYADVMAVSRDSETYSTRENTA IARFQPGTTQADREMQRVIMI  
NVDPPEHTKLRAIVSRGFTPRAINALRGSLAERAERIVRDAAVRGTGDFV

TDVACELPLQAI AELIGVPQHRRKVF DWSNQLIGYDDPAYGVDPMAAAA  
ELLAYAMEMANERQRNPSDDLVTQLVNAQIDG EHLTTDEF GFFVMLLAVA  
GNETTRNAITHGMLAFLEHPDQWELFKAERPRSAVEEII RWATPVNVFQR  
TALVDTTLGGQAITAGQRVALFYGSANFDES VFEEPERFDITRSPNPHLG  
FGGSGVHFCLGANLARLEIELIFNSIADHMPDIRKVADPQRLRSGWINGI  
REMPVRYR

>CYP208A22 (2515992033) *Salinispora pacifica* CNT001

MTVIADRGGRI PPGPPVTAGLRLL LALGRDRLGMMTSAAA EYGDVARLPV  
GPKKLYFFNHPDHAKHVLADNHANYQKGIGLVHARRALGDGLLTSE GELW  
RKQRRVIQPAFQNRRLAQYAGAVGQEATRLVARLATRV DGPVVDLDEMT  
RLTLGVLGRTL LDDAELTGFGHVGESFAAVQDQAMFELET LNTVPTWIPLR  
RQRRFRRARQHLQEVDVLA AERGQAVEGRDDVLSRLILSTRAEADPQLG  
RERLRDELVTLLLAGHETTASTLGWSLHLLDQHPELRERVRHEARTVLGD  
RVPAYEDLHQLRYTAMVVEEAIRLYPPVWILTRKARAEDEIGGYRVPAGA  
DILICPYTLHRHPRFWAE PERFDPERFDPSRTTDRPRYAYIPFGAGPRFC  
VGNNLGMLEATLVLA VLLRDLRLEGLPGRAVVPEPMLS LRVRGGGLPMTVR  
RVD

>CYP211B11 (2515992548) *Salinispora pacifica* CNT001

MDASEAVALLTSPPGRLDPYPTYERLRAHG P VVSTAAGFFVVTGYTEADT  
VLRNPRFEVMDDEERDGVFPHWQDSPAMISISRSMIRANPPDH SRMRRLA  
AGVFTPRRVAALREVVA AQADGLVDEMIRAGRGGAAVDFMG SFAYPLPVT  
VICALLGVPTADWARFRHWASDLTG VLEPEITPQELAIADAGASELRDYF  
TELIAQRRRAPADDLT TALVQAHDADGDRLSGEELLANLVLLLVAGFETT  
TNLLGNGLVVL LTHPDSATALRGQPELAPGYVEEF LRYDSPVQLTSRTVR  
ESVSLAGVELPAGSWLLVLLGAANRDPARFTD PARFDP RRAQSPPLSFGA  
GAHYCLGAGLARLEAQVAFPLLLRRLPELALAGEPTRRHRLTLRGYETLP  
VTVGAVPADPGTPAGVALGTP

>CYP1005A6 (2515994036) *Salinispora pacifica* CNT001

VSAVLFRSWTKTAGTHWPAVTRVADQQGTEHLVVTEHALVRQVLT DQVTY  
RPDNALDAVTPI PVAALRVLAGHRFRLPPTLANNGGVSHPAIRALVADAL  
HPAKVAAQR PWLTELVAERVA AIRATLDSGGSADLHAE LSADLPLLVLAR  
LVELPDAPVSAVKQFARVALELFWAPLDADRQLALADEVGRFHQV LREFA  
DTGGGLAAALRATGHPPDVLVGALFFLLVAGQETTSQFL TLLLHRLAGEP  
TVRAALRDGSVSVPNVVEEGLRLEPPIV TWRRVA AVDSTLGGTAVPAGTS  
VLLWLARAGRDPAIVSAPDEF RFGQ RGSRRHLAFGAGAHRC LGDQLARME  
AAVVVERVSPLLDGVTVVRAPWYPDNL TFRMPDAFVIRRG PAGAAER

>CYP161N4 (2515994691) *Salinispora pacifica* CNT001

VNTVAQLPFTQT HVL DVAPALRLLQSRGKVHRVRTPEGVPAWLVTGHAEV  
QQLLDDDRLSRSDPGGRDG GTALLNKLLGPLADDPRLRSLL EPQFTPER  
LEPLRAVVEKLTEQHLDELATRTPPVDLRPTLAMS LPIILVLC EWLGVPAE  
DKGRFSVWTQDAAGVQDPERSQRGLAELFGYCRQLVAAKRQDPGDDVISR  
LIATAGIGDTEVVALTALLLFGGYETTVARIGTG VLLLLTNPDQWAAVRA  
DPALVPATVDELLRRSMPNPHNGGMPRFAVTGFEIDGAAIRAGDLVLLNI  
IAANHDETAFPDPDRLDITRPTAGSLAFGYGRHSCVGAPLARMVLRVALS  
RLITRFPDLRLAVGVDELKLRHETLVGG LVELPVTWGPR

>CYP2054A3 (2515994696) *Salinispora pacifica* CNT001

MSISADSEQVQGRPFDPYGAHRDDPYTF LAGLVFYAPLLDAWCVTRRED  
MVAVLRDDRSFSARDHNPRPAVALPDDVNQMFR TWRGAGAVAVGSLDPPA  
HAKIRDVLNIGFTPARVRAFEPTMRAVAADLADRIGDAPEFDFIADFAVP  
FALEVIGRRLGV PDDYLDRCRTWSEQRIELMMAQGDADHDRLREFARGLM  
EFGEFARS LVRDRVADPRDDLISELLHDGKAGRTLTAD E VAVQIPTLIFA



GHMTCAEALGTIFYQQLRSPGGWARVVDRITIPVGDLVEEGLRFDSPLAGM  
YRTATRDVTVGGIRLTAGSRLLLLYGAAGRDSRAHACPAAFRPGDGSSGH  
LAFGHGHIHFCLGAGFARAELRVAVEVLAARMPDLGLAPGRPPRFRPVFPL  
RALTEL RVTRSGGSGP

>CYP107FH3 (2515994701) *Salinispora pacifica* CNT001

VPIELDEAFVQDPYAVYEKLRAEGPAHRVRMPPGVPLIGGLPVWLITGYD  
AVRAALADSRLSTDLHRIDGLFAQKDPDCSHRGGFSSALASHMMHTDPPD  
HTRLRKLVSKAFTTRRAIEALRPRIQQTDELTAADLAGHDTVLDLDAFAFP  
LPIRVICLLLGVPVAEQENFRSWSRALVSGHSPEAAATAATEVAAYLGDL  
VERKRHATTDVLTALVAAHVDVDDRLTHTELVSTAYLLFIAGFETTLNAL  
NGTLLHMLHRDQWTALRADRALLDNAVEEFLRLESPLKHATFRCATESL  
RIGDAEIAAGDFVLLAIASANRDPRRFPDPHTLDVRRPAAGHLAFGHGHIH  
HCLGAPLARVEVRMAFDALLDAFPDMRLATDPAGLRWRNSTIIRGLDSL  
VHLNN

>CYP107AY9 (2515994839) *Salinispora pacifica* CNT001

MSQDQPTRAELAPIPRSGTRIGPEYDQLRKTDGVDVHQQVLLPDTSMWLVT  
PDLVSRALADPRLALNRKHSRGGWSGFALPPALDANLLNLDAPDHTRLR  
LVGPAFSPQORVAALRPRIQRTAEELAETMVATGSPVDLVTGYCTPLSVQV  
IADLLGVDPAGRTDLRAWTDMLTSYPPDRDAIRQAVVELHGYVNLIEA  
KQORPGDILLSALVATEQEGDRLTRDELTSALFLILFAGYENTANLIAS  
VLRLLDHGSLRGVRVSEAIETLRLEPPAPAAIRRFTEEMTIGGATIPA  
GDTVLLSIAAATRGADGNPARLAFNGPHYCLGAALARVEAEEAITVLAR  
RLPGLALAVPGAPVRWRPTFRTHGPAELLVAW

>CYP244A10 (2515994859) *Salinispora pacifica* CNT001

MQDTAQANLAEAPEVRMPIELRPTDCLPELLAAARVAPVVRTPYLDQHAW  
VVCDELVKQALTHPKLGKDVALAPDWMRQPGQMTAMPPEYARMMVMS  
DGEHHARIRRIHAPVLSRPNTERWSERVAALVDGFLDNLDSADGTEVNLI  
TDYTHKIPLAFTAEMGLPPGAERRLHDITEVMLYSADYALRQQAVGELF  
EAVQEWVRDPAGLRDGVITGLLASADGPDATVTKGEAIVWTLSLIINGYE  
TTGSLISAALYEALRRPARERPHTDEAVAAWIEETLRVQPPVPHTTWRF  
LADLDLGGYLIIPRGAPVQISLAAANLDPDEDADSFDAQRRGRGHLSFGLG  
AHYCIGAPLARVQTKIALRGFLRRFPQARLSLDTAPRWESEWMIRMSVL  
PVLLA

>CYP105AB28 (2515995297) *Salinispora pacifica* CNT001

MTETASTTTPGISSTTTSGPASGEVTDAEFFLERGCFFSTPTEYEQIREH  
SPLAKVRLTTGREAWWIAGHELGRAVLADRRFSSDRRRDNFFVSTDPE  
RKQLQDQPTSMIGMDGAHAQARRALMGFTVRRMAGLRPRIQQIVDQHI  
DEMLSSDQRTADLVEALSPLVPVSLVICELLGVYPYADHDFQARSGPLIRH  
TTPTEVRLRIQKELNTYLGALIDRKVADPTDDLRSRQIAKHHAAGTFDRT  
SLVSMAFLLLIAGHETTANMISLGVVGLLQHPDQLAMIKEDPEKTAPAVE  
ELLRYFTIADTVTARVATEDVQLGGTTINAGDGVVISGLAADHDPTVFTD  
PDRDLERGARHHVAFGFGPHQCIGQTLARMELQIVFDTLFRRIPTLRLA  
APLDDIPFKSDAFVYGAERLPVAW

>CYP107E37 (2515995943) *Salinispora pacifica* CNT001

VTIDQEIREYPPFRESRGIGIDPTYELLRRTEPLARVQLPYGEVSWLVTRY  
EDVKTVLTDPRFSRAAAQKDKQPRTRAEMTYEGIIGLDPPDHTRLRLLAG  
KALTARRVNARADAQRIANEYVDEMIAGKSPGDLVELFALPYPVTVICE  
LLGVPFEDRAQFRIWTEGLTSTSEQLMVYAEQLFDYMGKLVQRRRAEPTD  
DLLGALVKARDEGDRLTEQELLSIAGVGLLLTGIVETVSTHIPPVYALLT

HPELMAQLRADRS LVPAAVEELLRMIPLNPAAMFPRYAVEDVTLSGITVR  
AGQPVLVSLPGANRDPEVFENPETFDFTREQNPHVAFGHGPHHCLGAQLA  
RMELQVALHTVLD RFPDLRLADGDEGVSWKSGLLVRGPSRLLVGW

>CYP124M3 (2515995969) *Salinispora pacifica* CNT001

MTVPIELDAVDLS DNDFWTKPLEYRHAVFNALRAQPGLPHFASPEFGSAP  
RGRGYYALTRMDDVLAVSRNPSVFI SGKGNVAMEVPAEFLDQSLITMDNP  
RHARLRIVSRGFTMKAVTALMDNASQMAKQIVDEVVERGECDAVVDISA  
KLPLGIIICNMGI PDSQQQFVFEQTNVMLGVQDPEYVGEQNDAMLAMSVA  
SQELADLMHELATLR AKNPTDDLISKLLSAEVNGEALTPSELAHFFILLT  
GAGTETTRNAISWGIQLLTQSPEQREAWLS DIDGVTPPTAVEEIVRWSSPV  
ISQRRTVAEDAEPVKLAGQLLGPGDKVLMFYGAANRDPNYFVHPEGFDVR  
RSPNPHVGYGGPGPHFCLGAHLARLEISVMFRELLTRIPDIHATGEPARL  
KSPLINGIKRLPVAFTPGAR

>CYP294A4 (2515996040) *Salinispora pacifica* CNT001

MTLLDTAGLGPLPSFLQQQGAGAVLP IVSPAGNTMWLV RDYTLARKVLT D  
PRFSRAAAVTPQAPKFND AQPAA DSMMSMDGA EHARLRRLVSGAFTTGRV  
AAIAPWVERWVDERLDR LERRGTGADLIGDLAAPLSVSVLCTLLGIPAAD  
SERFRGWVEVLF DITASSPHEKGRRRLELLDYMGTIEQKRRQPDDALLT  
VLIKAQERGEMSMAELLT LGLTLLMAGYETTVGQIGLAALVILSDEVVYD  
ALKRQPERLPGTVEELLRLTPATPLSF SRVATRQVQLGEVTVRAGEGVV  
SLLHGNRDPATFPDPQRLLPQGRDAGHLTFGHGVHRCLGAPLARLQIQTV  
LNRLIGHFPRRLVDALEPVAWKHGLATRGLSRLSVEWR

>CYP163B1 (2515515979) *Salinispora tropica* CNH898

VTAADTGRVSGESQTPAHTVDLADPATFANHDLTGFWQQLRDEEPIHWN  
PPTAGRRGFVVVSRYADIL DVYRDDVTFTSERGNVLVTLLAGGDAGAGRM  
LAVTDGPRHAELRKLLLRALGPRVLAPVCAAVRTNTRQMIREAVTKGEC D  
FASDIASRIPMMTISNLLGVPDADRAFLSLTKTALSADDESISETESAM  
ARNEILLYFQDLMEFR RDHPGEDVVSMLVNSSIDGAPLSDDDIVLNCYSL  
IIGGDETSRLTMIDSVNTLAAHPQQWRR LKDGQCEIDKAADEVLRWASPS  
MHFGRVAARDTILHGVRI RADDIVTLWHASGNRDERVFHRPEVFDLGRTP  
NRHLSFGHGHPHYCIGSYLAKVEISELLIALRDLTSGFETTGE PQIRSNL  
LTGFATMPVRFPVDRAGLARDALDG

>CYP107NH1 (2515516273) *Salinispora tropica* CNH898

MTEPVVSLMDPEFWNDPVSAYERLRGSGPLIRMGLPGVPPVWLVTSC EHV  
KSALSDPRFVVDAANVPGHHGPGIVDKMMAASGMPDEF RDYMTNMMFTDG  
KDHSRLRLRLVTPGFSARRIRAMRPRVNQIAEELVESLAEKGS GELIADFS  
APLT TTVICELIGVDRADQAQMGAWMHDYTTGERVVSGRAMVNYTRDLIE  
RRRAEPADDMISAMIRSGDEAGDRLSDAEIIAMALLLINAGHHSTAQFIP  
NAVLVLLDHPEQLARLR AEPGQLPGAMDELMRLANPVPIATPRYATEDME  
FAGVAVRRGEALTGSLEAANFDPERFPAPRQLDTGRDLGRGDGHL SFGAG  
PHYCPGAALARLEGEI ALDHLLLRDNLRLAVERDEVYVDVSLGLRMLS  
SLPVRL

>CYP247A8 (2515516279) *Salinispora tropica* CNH898

VRLNPEAGRPVALGSIDLFPDLLASGDPHSVWDV MRSEAPLHRQVLPDG  
RVFWSVTRYEDVCRVLGDHRAFTSERGTVFTQLGADDIAAGKLLTSTDPP  
RHTEVRR AIGGRLTARAVAHWEDLVRRAVVRFL E PALDGGCWDLAERAQH  
LPLIIAGSLLGIPDS DWEKLVQLTGMVTAPSDPMFGLDSEAATLAI AHHE  
IFDYLSDLVRRRRSVGTGGDSL LDHLMTVRAGAGPLPDEEVVYDSYSLIL  
GANATT PHTLSGIVLTLAERPEQCDKVRADASLIPSMVEEGLRWTSACN  
FMRYATVDTRLTGGTVPAGEAVVAWIASANRDESQFADPHTFDVTRGENR  
HVAFGFGPHYCIGAPLARM TARIFFEELFRLFW SIEIDGEPQHLSNFIA

GMTHLPVVTRKRAQV

>CYP107Z27 (2515516289) *Salinispora tropica* CNH898

MSCTHPCHSLMDPTLIDDPAGGFSRIRDESPLAHAMVPGVDGPVWLVTRH  
ESVRKVLGDRRFVNDPTNPVPGSSTPDLWAHAALAQQVPHEYLEHVRSMLO  
LDGEVHARLRRLVSRAFTMRRITALRPRMMQLTEELLDLLPAKAEDGVVD  
LVEHFNYVQPISVICALVGVPAADRAAWIRWSRALTSMESGTIGDAVTGM  
VDNIRALIEQRRAEAADDLLTDLVRVRDADGDRLSEREMITMVITLVTAG  
HDSTGLLLSNGLAALLTHPDQLAKLRADPSLGPQAFDELMRWCSAIVAAR  
PRYATEDVELEDGLVRRGDVVI PVLVSANYDPEVFEDPHRLDISRVHEQR  
RFHHVGFGDGLHYCLGAALAKHEAAIAITALLERYPGLELAVPAQRLRRA  
RLPLTWRLDSLPRVLGIGG

>CYP211C1 (2515516685) *Salinispora tropica* CNH898

VLDVEGLLTRLYSEQGRQDPYPVYADLHAQGAIAALAPRPEGQRVA AVAV  
GYDLVGAVLRDPEWSKQPPPGWMEQEILRTLQSSMMFINPPDHGRMRKVF  
AGTFTPRRLGTLEPVINRVADELDRMADAGPGEVDFVAEFAYPLPARVM  
AEFIGIPATELAWYRDRVDRIDAFLDVAGKTPERLAAAANAAAAELRVFYA  
DLLARRRRTPGEDLISGLVEAVDAGGVQLTEDELINNLIIVLFNASFVTTV  
YMLSNGLPVLLHEPEVAAAALADDPELTAGAIDEILRLQTPVHLLARAAAPR  
DTVLGGVPIPPQGQNVLLLIAAAANRDPAHFPDPDRFDPRRPGPPSLAFGLG  
LHYCLGA AVSRLEGRALPRLLSRFPRLRIMEQPVYSGSLFLRGIDKLSV  
SPGGRMHP

>CYP125A15 (2515516818) *Salinispora tropica* CNH898

MTEPRIPVGFDFDTPAVLERRVPREEFAELRRTAPVWWNVQPRGSAGFDD  
DGYWVVTRYADVMASRSDSTYSTRENTAIARFQPGTTRADLEMQRVIML  
NVDPPPEHTKLRAIVSRGFTPRAINALRGSLAERAERIVRDAAVRGTGDFV  
ADVACELPLQAI AELIGVPQHHRKVFWDWSNQLIGYDDPAYGVDPLTAAA  
ELLAYAMEMANERQLNPSDDLVTKL VNAQIDGEHLTTDEF GFFVMLLAVA  
GNETTRNAITHGMLAFLEHPEQWELFKAERPRSAVEEII RWATPVNVFQR  
TALVDTTLGGQAI SAGQRV ALFYGSANFDES VFEEPERFDITRSPNPHLG  
FGGSGAHFCLGANLARLEIELIFHSIADHMPDIRKVAEPRRLRSGWINGI  
REMPVRYR

>CYP208A4 (2515516897) *Salinispora tropica* CNH898

VTVAAAGRTFSGPTGAALLRSLWQLGQDRLGLMTSAARYGDAVRLGVGSR  
SLYFFNHPDHAKHVLADNSGNYTKGLGLVHARRALGDGLLTSEGELWREQ  
RRVIQPVFQAKRVAGQAHAVAEEADRLIARLRARRGRGPVNLTDEFTALT  
LGVLGRITLLDANLDAFTTVGA AFEEMQNQAMFEMASMSMVPWVPLPQQ  
RFRRARRELERIVGRIVADRTARGE GTGADDALSRLIASTRDEPDGVAR  
RRMRDELVTLLLAGHETTASTLGWTFHLINQDPRVRVRLREEAIDVLGGR  
LPEYADLARLTYTKMVVSEAMRLYPPVWMLSRLARDADVVDGYPPV PARAD  
VLICPYTLHRHPAFWPEPERFDPERFDPEVTTDRPRYAYVPFGAGPRFCV  
GNHLGLMEAVFVAMVSREFDLVAPVGQPVVAEPMLSLRVRGGLSMTVEP  
VS

>CYP154M1 (2515516926) *Salinispora tropica* CNH898

MRRRC SVVIDPAGTDIHAEGARIRANGSVSQVELPGGVLAWSVTGQQVAR  
KVLSDQRF SKDPRKHWT DYLEGRIGQDFPLIGWV LMDNLT TAYGSDHSRL  
RKPCANAFTPRRVEALRPAVERAAVELL GELATVSPTESVDLKARYAHPL  
PSRVICDLFGVPEEDREEMLRGGEVNV DTRVSAEEAAAANVERWHQQMLDF  
IEEKRRNPGPDLTSDLIAAQQAEGSRLTDSEMVGTLHIMLATGT EPVKNL  
IGNAVFALLTHPEQLDLVRSGRAGWDDVIQETLRMQAPVAHL PFRFAVED

VDIDGVTIRRGDPLLNVNFAAIGRDPDVHGDAAEFDITRADKEHLSFGHG  
VYRCIGQPLALREAEIALRMLFQRFPNLVLAVPPEEVTPOPTFIMNGLDT  
LPVLLKGRA

>CYP211B1 (2515517356) *Salinispora tropica* CNH898

MDASEAVALLMSPLGRIDPYPTYERLRAHGPFVVQTAAGFFVVTGYTEADT  
VLRNARLAFEVMDDELRDDVFPHWQDSPAMKSIARSMIRANPPNHGRMRR  
LAAGAFTPRRIAALREVVTQADELADDEMIRAGRDGAPVDFMGSFAYPLP  
VAVICALLGVPAADWARFRGWASDLTAVLEPEITPQELTVADAGASELRD  
YFTELIAQRRRAPADDLTALVQTHDADGDRLSGEELLANLVLLLVAGFE  
TTTNLLGNGLVVLLAHPDSATALRGQPELAPGYVDELLRYDSPVQLTTRT  
VRESVLLAGVELPAGSWVLVLLGAANRDPERFTDPTRFDPGRAQSPPLSF  
GAGAHYCLGAGLARLEAQVAFPLLLRRLPELALAGEPTRRNRLTLRGYET  
LPVTVSAIAADHGTPAGVARGTP

> CYP107AX1 (2515518410) *Salinispora tropica* CNH898

MTSRPTAVFDQCLLRDPHSRYNALRDQAPVHHVLTDPGAPAWLVTRYNDV  
RAAFTDPRLSVDKRFSGTDGEHGSSLPPELDAHLLNRDPPDHTRLRLAA  
AACTPRRVADLHPAVERIVSTLLDGLAGHDRAELIGSLASPLPLQVMHEL  
LGLPTQANIDFRTWTNTLLSADANQPAQSRAAMANMRRFLIEQLAHKRAQ  
PGDDLLTGLLAAREDDDLTDELVAMVFLLMFAGYDNTAALIGTVTHAL  
LTNAELHEAVRGGSALDELIDEVLRWNPFAFPLAVRRFAREPITIAQGTI  
PAGDRIWLCLASANRDPAQFTQPDDELGIIGLRRPHLSFGHGIHYCLGAPL  
ARLQTTIAVTSLNRFPEMRLAVSAHDIRWRESFRLRGLIALPVYL

>CYP107AW1 (2515518632) *Salinispora tropica* CNH898

MESVTSTSAPPPVPYIADPYPALARIRANGPVSILHSDEGIPMWVIARYR  
NVRAALADPRFGQDARRAQTLADNRVAGVTLLGGDVIHMLNSDPPDHTRLR  
HLVQGAFTARRVAAMRPLVERITTSLLDGVGGRQTVDLVQDFAFPLPMLV  
ICELLGFPAEERDAYRSWSTAILTHNDDPAAFATALRDMTDYIEVQLRHR  
RARPGEDLLTELLAARDAGQLTDDEIVGMVFLLLIGGHETTNNLLGTATL  
ALVRNPDQHRWLLANPHALSEAIDEFLRYESPVAMATLRFTTAPVTVDV  
VIPAGELVLVSLGGANRDPDRFPDADRLILDRDRTGHLAFGHGLHRCLGA  
FLGKLEGEVALGALLGRYPGLTLAAEVRQLRWRDTIMLRGLESPLVSLHG

>CYP105AB2 (2515519026) *Salinispora tropica* CNH898

MTETASIATTRTASGQLTDAEFFVQRCFPFTAPTEYEQIREESSIAKVRL  
KNGGEAWWIAGHELGRSVLADRRFSSDRRRDNFPFVSTDPETRAQLQSQP  
TSM LGMDGAEHAQTRRALMGEFTVRRMAGLRPRIQQIVDQHIDEMPLATPQ  
RSVDLVEALSPLVPVSLVICELLGVADHDFQGLTGPLLRRHTTPPEVRL  
RIQEELNTYLGTLIDHKLTDPDILLSRQIAKHRDNGTFDRASMVSLAFL  
LLVAGHETTANMISLGVVGLLQHPDQLVLIKDDPKTPLAVEELLRYFTI  
ADSVTARVATEDVQLGDTTINAGDGVVISGLAADRDPTVFAEPDRDLER  
GARHHVAFGFQHCIGQTLARMELRIVFDTLFHRIPTLRLAAPLDDIPF  
KSDAFVYGIEELPVAW

>CYP1005A1 (2515519055) *Salinispora tropica* CNH898

VSAVLFRSWTKTAGTHWPAITRVADQQGTEHLVVTOHALVRQVLTQDQTY  
RPDNALDAVTPIPVAAALRVLAGHRFRLPPTLANNGGVSHPAIRALVADAL  
HPAKVAAQRPWLTGLVAERVAAIRRTLDSSGSTDLHAELNADLPLLVLAR  
LVELPDAPVSAVKQFARAALFWAPLDADRQLALADEVGRFHHQVLRFA  
DTGGGLAAALRATGHPPDVLVGALFFLLVAGQETTSQFLTLLHRLADEP

TVRAALRADSVSVADVVEEGLRLEPPIVTWRRVAAVDSTLGGSTVAAGTS  
VLLWLARAGRDPVVVPAPDEFRRPGQGRSRRHLAFGAGAHRCCLGDQLARME  
AAVVVEQVTPLLDGVTVVRPPWYPDNLTFRMPDAFVVR

>CYP1004B1 (2515519521) *Salinispora tropica* CNH898

MTTSALAPRFDALDPNVVEDPYPEYARLRAAGPLCRLGPGSWGVTREFADV  
TNLQHDPRLGSEFFPAGYHEISVGDGPASAFFQRMVLYRDPDPHIRLRRLM  
SGAFTPAVVRRLRSHIEDLVDELLAPALAAGRMDLVPELAYPLPVRVVC  
LMGIPPESTEDVRHHATNIGRAFTAVVPEQARTEADEAVSWLREHLGALL  
EQRRSHRGDDLLSRLLEDAEESGDNLDAEIVDNTVFSFFAGFETTVHMIT  
TGTAALLAHDPQLARLRADPSLVTTAVDEFWRWDAPIQGTARYVREPIEI  
GGRTIRRGRLVLMIGSANHDERRFAQPDRLDVGRQDNPHVAFGGGAHL  
LGAFLARMEGAVVFDRLARLAVLEPDGPTVREPNTPFRAVASVPVRIGDR

>CYP1004A1 (2515519525) *Salinispora tropica* CNH898

MRANTARPHLSAAFLATKDDPYPAYAELRARGPLTRAELGQWLVTGHGAV  
SALLRDGRLESMPAEYTRLTGLGDSGVDLHRLVLTTRTPPEHTRLRRI  
GRALGTPVVRRLHDRIAAATDALLEPALDRGRLDVVTELAVALPVGVC  
LIGIPTGDRPAVLTRVTALAKVFDAANLSPADLADINTALPWLHDYFGDL  
LAVRRAGSGGPTLTEMWEEASDRLAVADFVDNMLFLFHAGFETTMGLV  
SNGVAALLNNPEQLGRRLRADPALVPSAVEEFLRYDAPIQNVIRVARKPVE  
VAGQKIRAGRTVLLLLGAANRDEEVFADAERLDVGRDPNPHLGFGGGLHH  
CVGTALARLMMAVVVFERLVDRTVLGPAAPAVRRRHSLSYDHLPLAVA  
AR

>CYP107AY1 (2515519736) *Salinispora tropica* CNH898

MRAELAPIPRSGARLGQEYDQLRNAGDVHQVLLPDSSLAWLVTNPCLVSR  
ALTDPRALNRRHSRGSWSGFALPPALDANLLNLDAPDHTRLRLRVGP  
SPQRVSAALRPRIIRTAEHLLDTLVATSGPVDLVTGYCTPLSVQVIADLMG  
VPEAGRDLRTWTDMLTSYPPDRDAIRQAVVELHGYVVDLIDTKRQQPG  
DDLSSALVTIEQDGDRLTRDELTSALFLILFAGYENTANLIASVLRLLD  
HGGLRGVQLPEAIEETLRLEPPAPAAVRRFPTEEMTIGGATIPAGDIVLL  
SIAAATRGTAGNAARLAFNGPHFCLGAALARVEAEEALTVLARRLPD  
LALPVAQVRWRPTFRTHGPAELLVTW

>CYP107E3 (2515520828) *Salinispora tropica* CNH898

VTIDQEIRKYPFCESPGIGIDPTYGLLRSTEPLARVQLPYGEVSWLATRY  
EDVKTVLTDPRFSRAAAQKQDQPRTREEMTYEGIIGLDPPDHTRLRKL  
KALTARRVNIAIRADAQRIANEYVDGMIAGKSPGDLVELFALPYPVTVICE  
LLGVPFEDRAQFRIWTEGLTSTSEQLMVYAEQLFGYMGKLVAQRREEPTD  
DLLGALVKARDEGDRLTEQELLSIAGVGLLLTGVEVTVSTHINPFVYALLT  
HPELMAQLRADRSVPAAVEELLRMIPLNPAAMFPYAVEDVTLSGITVR  
AGEPVLVSLPGANRDPEVFENPETFDFTREQNPHVAFGHGPHHCLGAQLA  
RMELQVALHTVLDLRFDPDLADGDEGVSWKSGLLVGRGPSRLLLAW

>CYP107AY17 (2515520887) *Salinispora tropica* CNH898

MTGNPTPIPRSGAQLGQQYDHLRKTGDVHEVLLPDASLAWLVTNPVEAAR  
ALADPRALNRRHSRGGWSGFALPPSLDANLLNLDAPDHTRLRLRVGP  
SPQRVAAALRPGIRRAAEHLLDTLVATSGPTDLVTGYCNPLSVQVIADLMG  
IPEAGRTNLRAWTDMLTSYPPDRDAIRQAVVELHGYVVDLIDVKQQQPG  
DDLSSALVTIEQDGDRLTRDELTSALFLILFAGYENTANLIASVLRLLN

HGGLNEVPISEAIEEALRHEPPAPVAIRRFPTEDIIIGDVTIPAGDTVLL  
SIAAATRGLDGNAAARLAFGNPHYCLGAALARAEEAALAVLARRLPGLT  
LAVPVAQVRWRPTFRTHGPAELLVSR

>CYP107AW7 (2563541222) *Salinispora pacifica* CNY498

VETVTGTSTPPFPYIADPYPTLARIRANGPVSILHSDEGIPMWVIARYR  
DVRAALADPRFGQDARRAQALADNRVAGVTLGGDIVHMLNSDPPDHTRLR  
RHVQGAFTARRVAAMRPLVERITTSLLDGLTGRTTVDLVQDFAFFPLPMLV  
ICELLGFPAEERNAYRSWSTAILTHDDDPAAAFATALREMTDYIAVQLRIR  
QTRPGDDILTELLAARDAGQLTDDEIIGMVFLLLIGGHETTNNLLGTATL  
ALMRNPDQHRWLLANQHALLPEVIDEFLRYESPVAMATLRFTTTPVAVDDV  
VIPAGELVLVSLGGANRDPDRFPDADRLILDRRDTGHLLAFGHGLHRCCLGA  
FLGKLEGEVALGALLRRHPRLALAAEVRQLRWRDTIMLRGLESPLVSLHG

>CYP107AX4 (2563541236) *Salinispora pacifica* CNY498

MTSQPAPVFDQLLLRLDPHRRYNALRDEAPVHHIRTPDGAPAWLVTRYDDV  
RAAFTDPRLSVDKRLSSTDGEHGSSLPPELDAHLLNRDPPDHTRLRLRLAA  
AAFTPRRVADLRPAVERIVSTLLDGLVGHDAQELIGSLASPLPLQVMQEL  
LGLPTQTSVDFRRWTNTLLSADANQPAQSRSAMANMRRFLVEQLAHKRAR  
PGDDLLTGLLAAREDDRLTDDELVAMLFLLMFAGYDNTAALIGNVVHAL  
LTNTELPAAVRTGSLALDELVDGVLWRNPSFPLAVRRFAREPITIAGQTI  
PAGDRIWLCLASANRDPAQFTAPDTLGTGMRRPHLSFGHGIHYCLGAPL  
ARLQTTVAVTILLDRFPGIRLAVPAHDIRWRESFRLRGLVALPVFL

>CYP211B11 (2563541657) *Salinispora pacifica* CNY498

MDASEAVALLTSPPGRLDPYPTYERLRAHGPPVSTAAGFFVVTGYTEADT  
VLRNPRFEVMDDEERDGVFPHWQDSPAMISISRSMIRANPPDHSMRRLA  
AGVFTPRRVAALREVVAQAADGLVDEMIRAGRGAADVDFMGSFAYPLPVT  
VICALLGVPTADWARFRHWASDLTGVLPEEITPQELAIADAGASELRDYF  
TELIAQRRRAPADDLTALVQAHDADGDRLSGEELLANLVLLLVAGFETT  
TNLLGNGLVLLTHPDSATALRGQPELAPGYVEEFLRYDSPVQLTSRTVR  
ESVSLAGVELPAGSWLLVLLGAANRDPARFTDPAFDPRAQSPPLSFGA  
GAHYCLGAGLARLEAQVAFPLLLRRLPELALAGEPTRRHRLTLRGYETLP  
VTVGAVPADPGTPAGVALGTP

>CYP125A65 (2563541866) *Salinispora pacifica* CNY498

MTEPRIPVGFDFTDPAVLERRVPREEFAELRRTAPVWWNVQPRGSAGFDD  
DGYWVVTRYADVMAVSRDSEYSTRENTAIARFQPGTTQADREMQRVIMI  
NVDPPEHTKLRAIVSRGFTPRAINALRGSLAERAERIVRDAAVRGTGDFV  
TDVACELPLQAI AELIGVPQHHRKVFWDWSNQLIGYDDPAYGVDPMAAAA  
ELLAYAMEMANERQRNPSSDLLVTKLVNAQIDGEHLTTDEFGFFVMLLAVA  
GNETTRNAITHGMLAFLEHPDQWELFKAERPRSAVEEIIIRWATPVNVFQR  
TALVDTTLGGQAITAGQORVALFYGSANFDES VFEEPERFDITRSPNPHLG  
FGSGVHFCLGANLARLEIELIFNSIADHMPDIRKVADPQRLRSGWINGI  
REMPVRYR

>CYP208A22 (2563541964) *Salinispora pacifica* CNY498

MTVIADRGGRIPPGPPVTAGLRLLLLALGRDRLGMMTSAAA EYGDVARLPV  
GPKKLYFFNHPDHAKHVLADNHANYQKGIGLVHARRALGDGLLTSEGEW  
RKQRRVIQPAFQNRRLAQYAGAVGQEATRLVARLATRVDPGPPVDVLDEMT  
RLTLGVLGRTLLDAELTGFGHVGESFAAVQDQAMFELETNTVPTWIPLR

RQRRFRRARQHLQEVDVLAERGQAVEGRDDVLSRLILSTRAEADPQLG  
RERLRDELVTLLLAGHETTASTLGWSLHLLDQHPELRERVRHEARTVLGD  
RVPAYEDLHQLRYTAMVVEEAIRLYPPVWILTRKARAEDIEGGYRVPAGA  
DILICPYTLHRHPRFWAEPERFDPERFDPSTTDRPRYAYIPFGAGPRFC  
VGNNLGMLEATLVLAVLLRDLRLEGLPGRAVVPEPMLSLRVRGGLPMTVR  
RVD

>CYP124M3 (2563541985) *Salinispora pacifica* CNY498

MTVPIELDAVDLSDNDFWTKPLEYRHAVFNALRAQPGLPHFASPEFGSAP  
RGRGYALTRMDDVLAVSRNPSVVISGKGNVAMEVPAEFLDQSLITMDNP  
RHARLRRIVSRGFTMKAVTALMDNASQMAKQIVDEVVERGECDAVVDISA  
KLPLGIIICNMMGIPDSQQQFVFEQTNVMLGVQDPEYVGEQNDAMLAMSV  
SQELADLMHELATLRAKNPTDDLISKLLSAEVNGEALTPSELAHFFILLT  
GAGTETTRNAISWGIQLLTQSPEQREAWLSIDGVTPTAVEEIVRWSSPV  
ISQRTVAEDAEPVKLAGQLLGPDKVLMFYGAANRDPNYFVHPEGFDVR  
RSPNPHVGYGGPGPHFCLGAHLARLEISVMFRELLTRIPDIHATGEPARL  
KSPLINGIKRLPVAFTPGAR

>CYP1207A12 (2563542371) *Salinispora pacifica* CNY498

MITVPLTDRYLLDEDLVADPYPYLAELRVAEPVRWSPVHRAWLVTGYEAA  
ASCYAEPAISADRIGPMLAQTPLELLSPEAARAFTIMAGWMVFVDPPEHR  
RLRSVFRGAFGARQVRNRPMVQEAVTRLTARTGTGTVGDTVDLVAEFARPL  
PATVAASWMMGVVEDTAVFQRWAIQVGDALGTVQSPEEHRSQQALLDL  
FDYLRMLVTRRATPGEDLISAALANGLVGDSVSEDEFVAMLTHVAFAGG  
ETTSNLIAVGTWNLLRHPDQLALLRAEPELAPVAIEELLRFDGPSKMSIR  
HVKNDELAVAGQRLRAGQRLYVVVTAGANRDPDYFDHPNELDVRRHPNPHLG  
FGQGGHFCLGAPLARLVAGAALTDLLAAAPGLALATAEVRWQPSLLNRS  
LQALPVR

>CYP105AB28 (2563543200) *Salinispora pacifica* CNY498

MTETASTTTPGISSTTTSGPASGEVTDAEFPLERGCFFSTPTEYEQIREH  
SPLAKVRLTTGREAWWIAGHELGRAVLADRRFSSDRRRDNFPFVSTDPE  
RKQLQDQPTSMIGMDGAHAQARRALMGEFTVRRMAGLRPRIQQIVDQHI  
DEMLSSDQRTADLVEALSPLVPVSLVICELLGVYADHDFQARSGLIRH  
TTPTEVRLRIQKELNTYLGALIDRKVADPTDDLRSRQIAKHHAAGTFDRT  
SLVSMAFLLLIAGHETTANMISLGVVGLLQHPDQLAMIKEDPEKTAPAVE  
ELLRYFTIADTVTARVATEDVQLGDTTINAGDGVVISGLAADHDPTVFTD  
PDRDLERGARHHVAFGFGPHQCIGQTLARMELQIVFDTLFRRIPTRLRLA  
APLDDIPFKSDAFVYGAERLPVAV

>CYP1005A6 (2563544025) *Salinispora pacifica* CNY498

VSAVLFRSWTKTAGTHWPAVTRVADQQGTEHLVVTEHALVRQVLTQV  
TYRPDNALDAVTPIPVAALRVLAGHRFRLPPTLANNGGVSHPAIRALVAD  
ALHPAKVAAQRPWLTELVAERVAAIRATLDSGGSADLHAELSADLPLLV  
LARLVELPDAPVSAVKQFARAALFWAPLDADRQLALADEVGRFHQVLR  
EFADTGGGLAAALRATGHPPDVLVGALFFLLVAGQETTSQFLTLLSHRL  
AGEPTVRAALRDGSVSPNVVEEGLRLEPPIVWRRVAAVDSTLGGTAVP  
AGTSVLLWLARAGRDPAIVSAPDEFPRPGQRGSRRLAFGAGAHRC  
LGDQLARMEAAVVVERVSPLLDGVTVVRAPWYPDNLTFRMPDAFVIR  
RGPAAGAAER

>CYP244A10 (2563544348) *Salinispora pacifica* CNY498

MQDTAQANLAEAPEVRMPIELRPTDCLPELLAAARVAPVVRTPYLDQHAW  
VVCDELVKQALHTPKLGKDVALAPDWMRQPGQMVTAMPPEYARMMVMS  
DGEHHARIRRIHAPVLSRPNTERWSERVAALVDGFLDNLDSADGTEVNLI  
TDYTHKIPLAFTAEMGLPPGAERRLHDITEVMLYSADYALRQQAVGELF  
EAVQEWVRDPAGLREGVITGLLASADGPDATVTKGEAIVWTLSLIINGYE  
TTGSLISAALYEALRRPARERPHTDEAVAAWIEETLRVQPPVPHTTWRF  
LADLDLGGYLIPRGAPVQISLAAANLDPDEDADSFDAQRRGRGHLISFGLG  
AHYCIGAPLARVQTKIALRGFLRRFPQARLSPDTAPRWESEWMIRRM SVL  
PALLA

>CYP107AY9 (2563544368) *Salinispora pacifica* CNY498

MSQDQPTRAELAPIPRSGARIGPEYDQLRKTDGVHQVLLPDTSMWLVT  
PDLVSRALADPRLALNRKHSRGGWSGFALPPALDANLLNLDPDHTRLRR  
LVGPAFSPQRVAALRPRIQRTAEELAETMVATGSPVDLVTGYCTPLSVQV  
IADLLGVPDAGRTDLRAWTDMLTSYPPDRDAIRQAVVELHGYVNLIEA  
KQQRPGDDLSSALVATEQEGDRLTRDELTSLAFLILFAGYENTANLIAS  
VLRLLDHGSLRGVRVSEAIETLRLEPPAPAAIRRFPTTEMTIGGATIPA  
GDTVLLSIAAATRGADGNPARLAFGNGPHYCLGAALARVEAEEAITVLAR  
RLPGLALAVPGAPVRWRPTFRTHGPAELLVAW

>CYP107FH3 (2563544564) *Salinispora pacifica* CNY498

VPIELDEAFVQDPYAVYEKLRAEGPAHRVRMPPGVPLIGGLPVWLITGYD  
AVRAALADSRSLTDLHRIDGLFAQKDPDRSHRGGFSSALASHMMHTDPPD  
HTRLRKLVSKAFTLRRAIEALRPRIQQTDELTELTGHDTVDLLDAFAFP  
LPIRVICLLLGVPVAEQENFRSWSRALVSGHSPEAAATAATEVAAYLGDL  
VERKRHATTDDVLTALVAHDVDDRLTHTELVSTAYLLFVAGFETTLNAL  
GNGTLHLMLHRDQWTALRADRALLDNAVEEFLRLESPLKHATFRCATESL  
RIGDAEIAAGDFVLLAIASANRDPRRFPDPHTLDVRRPAAGHLAFGHGIH  
HCLGAPLARVEVRMAFDALLDAFPDMRLATDPAGLRWRNSTIIRGLDSL  
P VHLNN

>CYP2054A3 (2563544570) *Salinispora pacifica* CNY498

MSISADSEQVQGRPFDPYGAHRDDPYTFLAGLGVFYAPLLDAWCVTRRED  
MVAVLRDDRSFSARDHNPRPAVALPDDVNQMFRWTRGAGAVAVGSLDPPA  
HAKIRDVLNIGFTPARVRAFEPTMRAVAADLADRIGDAPEFDFIADFAPV  
FALEVIGRRLGVPDYLDRCRTWSEQRIELMMAQGDADHDRLREFARGLM  
EFGEFARSLVRDRVADPRDDLISELLHDGKAGRTLTADEVAVQIPTLIFA  
GHMTCAEALGTIFYQQLRSPGGWARVVDRTIPVGDVVEEGLRFDSPLAGM  
YRTATRDVTVGGIRLTAGSRLLLLLYGAAGRDSRAHACPAAFRPGDGSSGH  
LAFGHGIHFCLGAGFARAELRVAVEVLAARMPDLGLAPGRPPRFRPVFPL  
RALTEL RVTRSGGSGP

>CYP161N4 (2563544575) *Salinispora pacifica* CNY498

VNTVAQLPFTQTHVLDVAPALRLLQSRGKVHRVRTPEGVPAWLVTGHAEV  
QQLLDDDRLSRSDPGGRDGGTALLNKLLGPLADDPRLRSLLEPQFTPER  
LEPLRAVVEKLTEQHLDELATRTPPVDLRPTLAMSPLILVLCEWLGVPAE  
DKGRFSVWTQDAAGVQDPERSQRGLAELFGYCRQLVAAKRQDPGDDVISR  
LIATAGIGDTEVVALTALLLFGGYETTVARIGTGVLTLTNPQWAAVRA  
DPALVPATVDELLRRSMPNPNHNGMPRFAVTGFEIDGAAIRAGDLVLLNI  
IAANHDETAFFDPDRDLITRPTAGSLAFGYGRHSCVGAPLARMVLRVALS  
RLITRFPDLRLAVGVDELKLRHETLVGGLVELPVTWGPR



>CYP107E37 (2563545402) *Salinispora pacifica* CNY498

VTIDQEIREYPPFRESRGIGIDPTYELLRRTEPLARVQLPYGEVSWLVTRY  
EDVKTVLTDPRFSRAAAQGKDQPRTRAEMTYEGIIIGLDPPDHTRLRRLAG  
KALTARRVNAI RADAQRIANEYVDEMI AKGSPGDLVELFALPYPVTVICE  
LLGVPFEDRAQFRIWTEGLTSTSEQLMVYAEQLFDYMGKLVAQRRAEPTD  
DLLGALVKARDEGDRLTEQELLSIAGVGLLLTG VETVSTH IPNFVYALLT  
HPELMAQLRADRS LVPAAVEELLRMIPLNPAAMFPRYAVEDVTLSGITVR  
AGQPVLVSLPGANRDPEVFENPETFDFTRDQNP HVAFGHGPHHCLGAQLA  
RMELQVALHTV LDRFPDLRLADGDEGVSWKSGLLVRGPSRLLVGW

>CYP154AJ2 (2517974478) *Salinispora pacifica* CNT584

VDES L FVIDPAGADIHGEGARLRASGPITRVLLPGGVEAWSVTGYHAAR  
QVLADARFAKNARQHWPAYVNGDLGPDFPLI AWARDNMSTADGES HARQ  
RRLVAGAFSPQRI AALQPRVERAVARALDELA AQA AERPGEPI DLKERYA  
HPVAARVIGELLGVPDGD PDGILDRAGYIESTPQRAAE EFALLRSKIETL  
VAAKRRAPGEDLISDLIAAQPSGCPVAGAGAGSDAELVGLAQLMLNTGAE  
PARNLITNTVLALLTRPGQRAQVMSGEVSWGDVVEETLR TDAPVAHL PFR  
FATEDVTIAGTTISRGDPVLVG YAATGRDPELHGATAGEFDARRADKRHL  
AFGHGVHRCVGPALTRMEVRIAVEALFTRFPGVRLAVEPKELVGQGT FVM  
NGRREL PVQGLCAQP

>CYP211C9 (2517974539) *Salinispora pacifica* CNT584

VPDIEGLLARLYSARGRQDPYPVYADLHAQAAIAALRLGPGRQ RVA AVAV  
GYDLVA AVL RDPEWCKQPPPGWRDQEILRILQSSMMFINPPDHGRMRHVF  
AGTFTPRRLGALEPVINRVTD ELLDRMADAGPGEVDFVAEFAYPLPARVM  
AEFIGIPTTELAWYRERVDRVDAFLDVAGKTPERLAAAANAAGAE LRAFYR  
ELLARRRRTPGEDLISGLVEAVDAGGVELTEDELISNLIVLFNASFVTTV  
YLLSNGLPVLLAHPEVAAALADNP ELAAGAVDEILRLQTPVHLLARA APR  
DTVLGGVSI PQGQNVLLLI AAANRDP AHFPDPDRFDPRRSGPSSLA FGLG  
LHYCLGAAVSRLEGR LALPRLLSRFPRLRILEQPVYSGSLFLRGIDKLSV  
SPGGKEYP

>CYP125A65 (2517974672) *Salinispora pacifica* CNT584

MTEPRIPVGFDFTDPTVLERRVPREEFAELRR TAPVWWNVQPRGSAGFDD  
DGYWVVTRYADVMAVSRDSETYSTRENTAIARFQPGTTRADLEMQRVIML  
NVDPP EHTKLRAIVSRGFTPRAIHALRGSLAERAERIVRDAAVRG TGDFV  
TDVACELPLQAI AELIGVPQHHRKVFWDWSNQLIGYDDPAYGVDPMAAAA  
ELLGYAMEMADERQRNPSDDLVT KL VNAQIDGEHLTTDEFGFFVMLLAVA  
GNETTRNAITHGMLAFLEHPEQWELFKAERPRSAVEE IIRWATPVNVFQR  
TALVDTTLGQQAISAGQRVALFYGSANFDES VFEEPERFDITRSPNPHLG  
FGSGVHFCLGANLARLEIELIFNSIADHMPDIRKVADPQRLRSGWINGI  
REMPVRYR

>CYP244A5 (2517974834) *Salinispora pacifica* CNT584

MSATTNAELHEAPETAMPVDPGLFDCMPDLIAAARIAPVVRIPYLG RHAW  
VVC DRELVKQAL THPKMGKDITLVPEWMRQPGLMVTAQPPPEYARAMIMS  
DGENHARIRRIHAPVLS PRNTERWGEQVADKVEGF LDEL SQAAAGSSAEV  
DVVTNYTHKIPLAFISEMLGLPPVAEHRLRSITDIMLYSSDYAARREAIG  
GLFGAVEEWVRNPAGLRDGVITGLLAGSDGP GAAVTEGEVIVWTLGMIIT  
GYETTGS LISTS LYEALRRPPHERPRTDEDITAWIEETLRVHPPFP HPTW  
RFPLEDIELGGYLIPKGAPVQVSIAAANRQPGEGADSFDAERRGHGHL SF  
GLGMHYCIGAPLVRLEAKIAVRGFLRRFPQARLSADTAVQWESEWMIRRM

SFLPAVLS

>CYP245A11 (2517974838) *Salinispora pacifica* CNT584

MSSTTLPRFTLTGWTTREDIVNPYPVYRRYREVAAVHRGEAGGDAPETFYV  
FSYDEVAQVLSSSCFGRGRSLDATAASVPVPADQKALRAVVENWLVFMDP  
PRHTELRSLLNRSFSFPRIVTGLRPRIARIAQELLSRLGQQVETDLVEGFA  
APLPILVIAELLGIPAERHGWLRNTAIALQEASSSRARRDTDGYARAEAA  
AQEFTEYFREQVCLRRGSTGDDLLTILANAQLRGAPVSLDAVVGTAVHLL  
TAGHETTTNSLAKAVLALQAHPAVLEELRGADRLTADSIEEFRLRYDPPVQ  
AVTRWTHQDITLGGWDVPRGSRVVALLGSANRDPARFPLPDALDVRFPAD  
RHLGFGGLGIHYCLGATLARAEEIGLQTLNLGLPTLGYPAQYVDYADDMV  
FHGPSRLILVNPGERFC

>CYP107AW6 (2517974921) *Salinispora pacifica* CNT584

VETVTGTSAPPPVPYIADPYPTLARIRANGPVSILHSDEGVPMWVIARYR  
EVRTALADPRFGQDARRAQALADNRVAGVTLLGGDIVHMLNSDPPDHTRLR  
RHVQGAFTARRVAAMRPLVERITTSLLDGLAGRKTVDLVQDLAFPLPMLV  
ICELLGFPAEERNAYRSWSTAILTHDDDPAVFATALREMTDYIAVQLRLR  
RSRPGDDLLTELLTARDAGQLTDDDEIVGMVFLLLLIGGHETTNNLLGTATL  
ALLRNPQHRWLLANQHALPEAIDEFLRYESPVAMATLRFTTTTPVTVDDV  
VIPAGELVLVSLGGANRDPDRFPAADRLILDRRDTGHLAFGHGLHRCCLGA  
FLGKLEGEVALGALLRRHPKLALAAEVRQLQWRDTIMLRGLESPLVSLHG

>CYP107AX10 (2517974934) *Salinispora pacifica* CNT584

MTAQAPPVFDQRLRLDPHRRYNALRDQAPVHHVRTPDGAPAWLVTRYDDV  
RAAFTDPRLSVDKRFSGTDGEHGSSLPPELDAHLLNRDPPDHTRLRLRLAA  
AAFTPRRVADLRPAVERTVSTLLDGLAGNDHAELIGSLASPLPLQVMHEL  
LGLPTQTSVDFRTWTNTLLSADANQPAQSRSAMANMRRFLVEQVAHKRAR  
PGDDLLTGLLCVREDDDGTLTDELVAMLFLLMFAGYDNTAALIGNVIHAL  
LTNAELAEAVRTRSLALDELVDGVLRWNPSFPLAVRRFAREPITIAGQAI  
PAGDRIWLCLASANRDPAHFTEPDEIGIADMRRPHLSFGHGIHYCLGAPL  
ARLQTTVAVASLFDRFPGIRLAMPVQDIQWRESFRLRGLVALPVFL

>CYP105AB27 (2517975149) *Salinispora pacifica* CNT584

MTETASITTPGTSSTTTSEPASGQVTDAEFFPVERGCPFSTPVEYEQIRDH  
SPLAKVRLTTGREAWWIAGHELGRAVLADRRFSSDRRRDNFFVSTDPEP  
RKQLQDQPTSMIGMDGAEHAQARRALMGEFTVRRMAGLRPRIQQIVDQHI  
DEMLSSDQRTADLVDALSPLVPVSLVICELLGVYPYADHDFQARSGLIRH  
TTPTEVRLRIQEELNTYLGALIDRKVTEPTDDLLSRQIAKQRAAGTFDRT  
SLVSMAFLLLIAGHETTANMISLGVVGLLQHPDQLAMIKDDPEKTPPAVE  
ELLRYFTIADTVTARVATEDVQLGGTTINAGDGVVISGLAADHDPTVFTD  
PDRDLERGARHHVAFGFGPHQCIGQTLARMELQIVFDTLFRRIPTLRLA  
APLDDIPFKSDAFVYGAEKLPVAW

>CYP211B16 (2517976031) *Salinispora pacifica* CNT584

MDASEAVALLMSPGRDPYPTYERLRAHGPPVATAAGFFVVTGYAEADT  
VLRNPRFAVMDDEERDGVFFHWQDSPAMMSISQSMIRANPPDHSRMRLA  
AGVFTPRRVAALREVVAQADELIDEMIRAGRGGAPVDFLGGFAYPLPVT  
VICALLGVPAADWAQFRRWAGDLTGVLPEEITPQELAVADAGATELRDYF

TELIAQRRRDPADDLTALVQTHDADGDRLSGEELLANLVLLLVAGFETT  
TNLLGNGLFVLLTHPESATALRDQPELAPSYVDELLRYDSPVQLTSRTVR  
ESVPLAGVELPAGSWLLVLLGAANRDPARFTDPARFDPGRAQSPPLSFGA  
GAHYCLGAGLARLEAQVAFPLLLRRLPELALAGEPVRRSRLTLRGYETLP  
VTVGAVAADHGTPAGAALGTP

>CYP105BL3 (2517976240) *Salinispora pacifica* CNT584

MSSHSAAPDPETATPLHTLAPELTFFQFERATPFPDPPEAYTELSGRCPV  
APVRMADGKPSWLITSFEGVRAALSDPRLSSDMSPGFPNRTGKPVDDL  
KDTLGAMDGERHRYRRLMTGELTVRRAKAMRPVITQITDEALDQLAAAG  
PGADLVTHVALVPSRVACHLVGIPLSEYELFTGMAAKLMDSTSSADQIA  
ALQDMVSYFDTLVTDREHHDRDDLGHMVRRYLATGELDREMLIRLAWTT  
MAAGQETTAHMI GLGVAALLRHPDQLELLRREPHLMPGAVDELMRYLPMI  
QFGIPRVAMDDVEVDGQTVTAGEGVVALPPLANRDPVFERPDELDVRRN  
ARQHLSFGYGPHQCPAHALARLELEVYGRLLERFPTLRLADSDADLKVQ  
DEDIMYRVSELAVAW

>CYP161T1 (2517976498) *Salinispora pacifica* CNT584

VTTQVFRTKTPIGHPAWLVTDYESVRDLLSDPRLRLTHERPGEAARLSNS  
VIFGRPQPSSETEAADHTRMRKLAQWFSARRLATFRPRLRELVDGLLDE  
LAATPKPADFHQVVSFPLPALVICEL LGVPYADREQFRWSDDAADMYDQ  
ERSVGGYQALRDYIAELAQVRLRMPGTDLISDLVESHRTPEGFTLDQVV  
ELGLTLLFAGHETTVAIDNGAVLLATHPEQRDLRAGDPSLLDAAVEEIL  
RGSVPRMNFARPD DTPAGALPRWANTDLVIGDVTVRAGELVLLGLAHA  
NVDERFFAKSARFDVGRVPNRHLTFGIGPHFCAGAPLARLELQELFVALL  
ERFPGLRLAVPAERLEPRANLLTGGMTRVPVTW

>CYP208A27 (2517976903) *Salinispora pacifica* CNT584

MTVITKRGGRVPPGPPVTAGLRLLALGRDRLGMLTSAATEYGDVARLPV  
GPKRLYFFNHPDHAKHVLADNHANYAKGIGLVNARRALGDGLLTS DGELW  
RRQRRVIQPAFLNRRLTQYAGVVGQEATRLAERLATRVDPVPVDVLEMT  
RLTLGVLGRTLLDAELTGFGHVGESFAAVQDQAMFELETLSAVPTWIPLR  
RQRRFRARRHLQEVVDVLA AERGQDVEGRDDVLSRLILSTRAEADPALG  
RQRLRDELVTLLLAGHETTASTLGWSLYLLDKHPQLRERVRHEATSVLGD  
RVPGYADLHQLYTAMVVQEAIRLYPPVWILTRKARAEDEVGGYRV PAGA  
DLLICPYTLHRHPRFWEEPGRFDPERFDPARLANRPRYAYIPFGAGPRFC  
VGNNLGMLEATLVLA VLLRDLRLEGLPGRAVVPEPMLS LRVRGGLPMMVR  
RAD

>CYP1005A8 (2517977568) *Salinispora pacifica* CNT584

VSAVLFRSWTKTAGTHWPPVTRVADQQGTEHLVVTEHELVRQVLT DQVTY  
RPDNALDAVTPIPV PALRVLAGHRFRLPPTLANNGGVSHPAIRALVADAL  
HPAKVAAQRPWLTKLVAERVAAIGATLD SGG SADLHAELSADLPLLVLAR  
LVELPDAPVSAVKQFARA ALELFWAPLDADRQLALADEVGRFHQV LREFA  
DTGGGLAAALRATGHPPDVLVGALFFLLVAGQETTSQFLTLLHRLAGEP  
TVRAALRDGSVSVANVVEEGLRLEPPIV TWRRVA AVDSTLGGTAVPAGTS  
MLLWLARAGRDP AIVPAPEEF RPGQRGSRRHLAFGAGAHRC LGDQLARME  
AAVVVEQATPLLDGTSVVRAPWYPDNLTFRMPDAFVIRR

>CYP161N4 (2517977794) *Salinispora pacifica* CNT584

VNTVAQLPFTQTHVLDVAPALRLLQSRGKVHRVRTPEGVPAWLVTGHAEV

QQLDDDDRLSRSDPGGRDGGTALLNKLLGPLADDDHPRLRSLLLEPQFTPER  
LEPLRAIVEKLTEQHLDELATRTPVVDLRPALAMSLPILVLCEWLGVP  
DKDRFSAWTQDAAGVQDPERSQRLAELFGYCRQLVAAKRQDPGDDVISR  
LIATAGIGDTEVVALTALLLFGGYETTVARIGTGVLNPDQWAAVRA  
DPALMPATVDELLRRSMPNPNHNGMPRFALTGFEIDGAAIRAGDLVLLNI  
IAANHDETAFFDPDRLDVTRPTAGSLAFGYGRHSCVGAFLARMVLRVTLS  
RLITRFPDLCLAVGVDELKLRHETLVGGVLVELPVTWGPR

>CYP205A3 (2517977799) *Salinispora pacifica* CNT584

MPISADSEQVQGRFPDPYGAHRDDPYAFLAGLVFYAPLLDAWCVTRED  
MVAVLRDDRSFSARDHNPRPAVALPDDVNQMFRTWRGAGAVAVGSLDPPA  
HAKIRDVLNIGFTPARVRAFEPTMRAVATDLADRIGDAPEFDFIADFVAP  
FALEVIGRRLGVPDDYLDRCRTWSEQRIELMMAQGDADHDRLREFARGLM  
EFGEFARSLVRDRVADPRDDLISELLHDGKAGRTLTADEVAVQIPTLIFA  
GHMTCAEALGTIFYQQLRSPGGWARVVDRTIPVGDVVEEGLRFDSPLAGM  
YRTATRDVTVGGIRLTAGSRLLLLYGAAGRDSRAHACPAAFRPGDGSSGH  
LAFGHGHIHFCLGAGFARAELRVAVEVLATRMPDLGLAPGRPPRFRPVFPL  
RALTELVRVTRSGGGCGP

>CYP107FH3 (2517977804) *Salinispora pacifica* CNT584

VPIELDEAFVQDPYAVYERLRAEGPAHRVRMPPGVPLIGGLPVWLITGYD  
AVRAALADSRLSTDLHRIDGLFAQKDPDRSHRGGFSSALASHMMHTDPPD  
HTRLRKLVSQAFTTRAIEALRPRIQQTDELIADLAGHDTVLDLDAFAFP  
LPIRVICLLLGVPVAEQENFRSWSRALVSGHSPEAAATAATEVAAYLGDL  
VERKRQATTDDVLTALVTAHDVDDRLTHTELVSTAYLLFIAGFETTLNAL  
GNGTLHMLHRDQWTALRADRALLDNAVEEFLRLESPLKHATFRCATESL  
RIGDAEIAAGDFVLLAIASANRDPRRFPDPHTLDVRRPAAGHLAFGHGHI  
HCLGAPLARVEVRMAFDALLDAFPDLRLATDPAGLRWRNSTIIRGLDSLP  
VHLNN

>CYP107AY8 (2517978692) *Salinispora pacifica* CNT584

MRAEPAPIPRSGARLGQEYDQLRKTDGVHQVLLPDTSLAWLVTSPELVSR  
ALADPRLALNRKHSRGGWSGFALPPALDANLLNLDAPDHTRLRRLVGPAP  
SPQ RVAALRPRIQRVAEELADTVVATGSPVDLVTGYCTPLSVQVIADLLG  
VPEAGRTDLRAWTDMLTSYPPDRDAIRQAVVELHGYVNNLIEAKQQRPG  
DDLSSALVATEQEGDRLTRDELTSLAFLILFAGYENTANLIASVLRLLD  
HGSLRGVRASEEIEETLRLEPPAPAAIRRFPTTEMTIGGATIPAGDTVLL  
SIAAATRGTDHESARLAFNGPHFCLGAALARVEAEEAITVLARRLP  
LAVPGAPVRWRPTFRTHGPAELLVTW

>CYP211B14 (2563445754) *Salinispora pacifica* CNY703

MDASEAVALLMSPGRLDPYPTYERLRAHGPPVPTAAGFFVVTGYTEADA  
VLRNPRFGVMDDEERDGVFPHWQDSPAMMSISQSMIRANPPDHSRMRRLA  
AGVFTPRRVAALREVVAQADELIDEMIRAGRGGAPVDFLGSFAYPLPVT  
VICALLGVPAADWAQFRRWASDLTGVLPEITPQELAIADAGATELRDIF  
TELIAQRRRDPTDDLTTALVQAHDADGDRLSGEELLANLVLLLVAGFETT  
TNLLGNGLFVLLTHPESATALRDQPELAPGYVDELLRYDSPVQLTTRTVR  
ESVPLAGVELPAGSWLLVLLGAANRDPARFTDPARFDPGRAQSPPLSFGA  
GAHYCLGAGLARLEAQVAFPLLLRRLPELALAGEPIRRNRLTLRGYETLP  
VTVGAVAVDHGTPAGAALGTP

>CYP245A11 (2563445926) *Salinispora pacifica* CNY703

MSSTTLPRFTLTGWNREDIVNPYPVYRRYREVAAVHRGEAGGDAPETFYV  
FSYDQVAQVLSSSCFGRGRSLDATAASVPVPADQKALRAVVENWLVFMDP  
PRHTELRSLNRSFSFSPRIVTGLRPRIARIAQELLSSRLGRQVETDLVEGFA  
APLPILVIAELLGIPAERHGWLRNLAALQEASSSRARRDTAGYARAEAA  
AQEFTEYFREQVRLRRGSAGDDLLTILANAQLRGAPVSLDAVVGTVGHLL  
TAGHETTTNSLAKAVLALQAHPAVLEELRGADGLTADSIEELLRYDPPVQ  
AVTRWTHQDCTLGGWEVPRGSRVVALLG SANRDPARFPLPDALDVHRPAD  
RQLGFGGLGIHYCLGATLARAELEIGLQTLLKGLPTLGYPAQYVDYADDMV  
FHGFSRLILVNPGERFCQ

>CYP244A5 (2563445930) *Salinispora pacifica* CNY703

MSATTNAELGEAPETSMPVDPGLFDCMPDLIAAARIAPVVRIPYLGRHAW  
VVCDELVKQALTHPKMGKDITLVPEWMRQPGLMVTAQPPPEYARAMIMS  
DGENHARIRRIHAPVLSRPNTERWGEQVAAKVEGFLELSKAAAAGSNAEV  
DVVTNYTHKIPLAFISEMLGLPPAAEHRLRSITDIMLYSSDYAARREAIG  
GLFGAVEEWVRNPDLRGVITGLLAGSDGPGAAVTEGEVIVWTLGMIIT  
GYETTGSLISTSLYEALRRPPHERPRTDEDITAWIEETLRVHPPFPHTW  
RFPLEDIELGGYLI PKGAPVQVSIAAANRQPGEGADSFDTERRGHGHLST  
GLGMHYCIGAPLVRLEAKIAVRGFLRRFPQARLSADTAVQWESEWMIRRM  
SFLPAVLS

>CYP208A26 (2563446796) *Salinispora pacifica* CNY703

MTVIADQGGRVPPGPPVTAGLRLLLLALGRDRLGMLTSAATEYGDVARLPV  
GPKRLYFFNHDPDHAKHVLADNHANYAKGIGLVHARRALGDGLLTS DGELW  
RKQRRVIQPAFLNRRLAQYAGVVGQEATRLAERLATRVDPGPPVDVLEMT  
RLTLGVLGRTLLDAELTGFGHVGESFAAVQDQAMFELETLSAVPTWIPLR  
RQRRFRARRRHLQEVVDVLA AERGQNV EGRDDVLSRLILSIRAEADPALG  
RQRLRDELVTLLLAGHETTASTLGWSLYLLDQHPQLRERVRHEATSVLGD  
RVPGYADLHQLYQTAMVVQEAIRLYPPVWILTRKARAEDEVGGYRV PAGA  
DLLICPYTLHRHPRFWEEPGRFDPERFDPARLTNRPRYAYIPFGAGPRFC  
VGNNLGMLEATLVLA VLLRDLRLEGLPGRAVVPEPMLSRLVRGGGLPMMVR  
RAD

>CYP125A66 (2563447121) *Salinispora pacifica* CNY703

MTEPRIPVGFDFTDPAVLERRVPREEFAELRR TAPVWVNAQPKGSAGFDD  
DGYWVVTRYADVMAVSRDSEYSTRENTAIARFQPGTTQADREMQRVIMI  
NVDPP EHTKLRAIVSRGFTPRAINALRGSLGERAERIVRDAAGRAGDFV  
TDVACELPLQAI AELIGVPQHRRKVFWDWSNQLIGYDDPAYGVDPLAASA  
ELLAYAMEMAHERQRNPSDDLVTKL VNAQIDGEHLTADEF GFFVMLLAVA  
GNETTRNAITHGMLAFLENPEQWELFKAERPRSAVEEII RWATPVNVFQR  
TALVDTTLAGQAI SAGQRVALFYGSANFDES VFEEPERFDITRSPNPHLG  
FGGSGVHFCLGANLARLEIELIFNSIADHMPDIRKVADPQRLRSGWINGI  
RELVPQYH

>CYP105BL6 (2563447739) *Salinispora pacifica* CNY703

MSSHPAAAPGPETATPLHTLAPELTFPQFERATPFDPPEAYTELSGRCPV  
APVRMADGKPSWLITSFEGVRAALSDPRLSSDM SHPGFPNRTGKPVDDL  
KDTLGAMDGERHRYRRLMTGELTVRRAKAMRPVITQITDEALDQLAAAG  
PGADLVKHVALVVP SRVACHLVGIP LSYELFTGMAAKLMEATSSADQIA  
ALQDMVSYFDKLVTDREHHDRDDLGHMVRRYLSTGELTREMLIRLAWTT  
MAAGQETT AHMIGLVAALLRHPDQLELLRREPHLM PGAVDELMRYLPMI  
QFGIPRVAMDDVEVDGQTVTAGEGVVALPPLANRDP AVFERPDELDVRRN  
ARQHLSFGYGP HQCPAHALARLELEVVSRLLERFPTLRLADGDADLKVQ  
DEDIMYNVSELAVAW

>CYP107AY7 (2563447844) *Salinispora pacifica* CNY703

MRAEPAPIPRSGARLGQEYDQLRKTDGVHQVLLPDTSLAWLVTSTELVSR  
ALADPRLALNRKHSRGGWSGFALPPALDANLLNLDAPDHTRLRRLVGPAPF  
SPQORVAALRPRIERTAEELVDTLVATGSPVDLVTGYCTPLSVQVIADLLG  
VPEARRTDLRAWTDTMLTSYPPDRDAIRQAVVELHGYVVNLEAKRQRPG  
DDLSSALVATEQEGDRLTRDELTSALFLILFAGYENTANLIASVLRLLG  
HGSLRGARASEAIEETLRLEPPAPAAIRRFPIEEMTIGGATIPAGDTVLL  
SIAAATRGTDGNSARLAFGNPHFCLGAALARVEAEEAITVLARRLPPLA  
LAAPGAPVRWRPTFRTHGPAELLVTW

>CYP211C6 (2563448227) *Salinispora pacifica* CNY703

VPDIEGLLARLYSAQGRQDPYPVYADLHAQAAIATLEPRPERQRVAAVAV  
GYDLVAAVLRDPEWFKQPPPGWRDQEILRILQSSMMFINPPDHGRMRHVF  
AGTFTPRRLGALEPVINRVTDDELDRMADAGPGEVDFVAEFAYPLPARVM  
AEFIGIPATELAWYRERVDRVDAFLDVAGKTPERLAAANAAGAELSFYR  
ELLAHRRRTPGDDLISGLVEAVDAGGVELTEDELISNLVVLFNASFVTTV  
YLLSNGLPVLLAHPEVAAAALASSPELAAGAVDEILRLQTPVHLLARAAPR  
DTVLGGVSIPQGNVLLLIAAAANRDPAHFPDPDRFDPRRSGPPSLAFGLG  
LHYCLGAAVSRLEGRALPRLLSRFPRLRILEQPVYSGSLFLRGIDKLSV  
SPGGREHP

>CYP1005A8 (2563449209) *Salinispora pacifica* CNY703

VSAVLFERSWTKTAGPHWPAVTRVADQQGTEHLVVTEHELVRQVLTQVITY  
RPDNALDAVTPIPVPAALRVLAGHGFRLLPPTLANNGGVSHPAIRALVADAL  
HPAKVAAQRPWLTKLVAERVAAIGATLDSGGSADLHAELSADLPLLVLAR  
LVELPDAPVSAVKQFARAALFWAPLDADRQLALADEVGRFHQVLRFEFA  
DTGGGLAAALRTTGHPDVLVGALFFLLVAGQETTSQFLTLLHRLAGEP  
TVRAALRDGGVSVANVVEEGLRLEPPIVTVRRVAAVDSTLGGTAVPAGTS  
VLLWLARAGRDPAIVPAPNEFRPGQQRGSRRLAFGAGAHRCCLGDQLARME  
AAVVVEQAAPLLDGISVVRAPWYPDNLTFRMPDAFVIRR

>CYP154M16 (2563449289) *Salinispora pacifica* CNY703

MPDRCPVLDPSEGRDIHAEADRLRAQAPAVKVELPGGVHAWISITSYDVVRR  
LLLDNRNVTKNARNHWPKFINDEIPPDWEMISWVAMDNMVTAYGKHLVRLR  
RLIAKAFTVQRVETVRPQVEKLVDLGLAAETGEVVDLREKFCYPLPA  
LLIADLIGMTEQQRAQTAKAMDLMVDTTVSPEQAQAILTGWRTAMDELIA  
AKRREPCKDIASDLIAARDDENGGQLTDSSELTDITFAILGAGSETTINFL  
DNAVTALVTHPGQLELVRSRGRAGWDDVIDEVLRVQCPLASLPLRYAVTDI  
ELDGVTIPQGDPIILINYAAAAGRDPALHGDGTAGEFDVTRENKEHVSFGHGP  
HYCLGAGIARLVATIGLSRLFERFPDLRLAVPAEELQPLPTFIMNGHRAL  
PIRLVPAPAAATAV

>CYP107AW6 (2563449613) *Salinispora pacifica* CNY703

VETVTGTSAPLPVPYIADPYPTLARIRANGPVSIHLSDEGVPMWVIARYR  
EVRAALADPRFGQDARRAQALADNRVAGVTLGGDIVHMLNSDPPDHTRLR  
RHVQGAFTARRVAAMRPLVERITTSLLDGLAGRKTVDLVQDLAFPLPMLV  
ICELLGFPAEERNAYRSWSTAILTHDDDPAVFATALREMTDYIAVQLRIR  
RSRPGDDLLELLAARDAGQLTDDEIVGMVFLLLIGGHETTIVNLLGTATL  
ALLRNPQHRWLLANRHALPEAIDEFLRYESPVAMATLRFTTTPVTVDDV  
VIPAGELVLVSLGGANRDPDRFPDADRLILDRDGTGHLAFGHGLHRCLGA  
FLGKLEGEVALGALLRRHPKLALATEVRQLQWRDTIMLRGLESPLVSLHG

>CYP107AX9 (2563449628) *Salinispora pacifica* CNY703

VTAQPAPVFDQRLLRDPHRRYNALRDQAPVHRVRTPDGAPAWLVTRYDDV  
RAAFTDPRLSVDKRFSGTDGEHGSSLPPELDAHLLNRDPPDHTRLRRLAA  
AAFTPRRVADLRPAVEKTVSTLLDGLAGNDHAELIDSLASPLPLQVMHEL  
LGLPTQTSVDFRTWTNTLLSADANQPAQSRSAMANMRRFLIEQVAHKRAQ  
PGDDLTLGLLCVREDDDGLTDELVAMLFLLMFAGYDNTAALIGNVIHAL  
LTNVELAEAVRTGSLAVDELVDGVLRWNPFSFPLAVRRFAREFITIAQGTI  
PAGDRIWLCLASANRDPAHFTEPDEIGIADMRRPHLSFGHGIHYCLGAPL  
ARLQTTVAVASLFDRFPGIRLAVPVQDIQWRESFRLRGLVALPVSL

>CYP208A21 (2563449639) *Salinispora pacifica* CNY703

MTTTSIERRRPPGPPRAAALSMLLTMSRDRLGMMTAAARAYGDAAWLPVG  
HKALYFFNHPDYAKHVLTDNSDNYTKGIGLVHARRALGDGLLTSEGELWR  
EQRRVIRPSFRSGRAPDQASVIAEEVASLVERLRARAGGPPVNVVTEFTG  
LTLGVLGRITLLDVDTALATVGDFAFAVQDQAMFELVTL SAVPTWIPLTR  
QRRFRRARAELEIRIVDDLVARRGDVSGRDDVLSRLILSTGAEPDARVRQ  
RLRDELVTLLLAGHETTASTLGWTLYLIDRHPPVRELRAEAAEVLGDRL  
PAYRDLPLDRFTTMVVQEAMRLYPPVWLLPRRSRRADRVGPYVWPAGSDV  
VVSPYTMHRHPGFWEPEPDRFDPLRFDPRNAADRPRYAYLPFGAGPRVCVG  
SNLGMTEAVIAVAMLCRELRLVRVPTHAAVPEPMLSLRIRGGLPMSVHLA  
D

>CYP105AB34 (2563450179) *Salinispora pacifica* CNY703

MTETASITTPGTSSSTATSGPGSGEVTDTTEFPVERGC PFSTPAEYEQIREH  
SPLTKVRLTTGREAWWIAGHELARAVLADRRFSSDRRRDNFFVSTD PET  
RKQLQDQPTSM LGMDGAEHAQTRRALMGFTVRRMAGLRPRIQQIVDQHI  
DEMLSSEQRSADLVEALS LPVPSLVICELLGV PYADHDFQARSGPLVRH  
HTPSKVRVRIQEELNTYLGGLIDRKVADPTDDLRSRQIAKQHAAGTFDRT  
SLVSMAFLLLIAGHETTANMISLGVVGLLQHPDQLAMIKNDPEKTPPAVE  
ELLRYFTITDVTARVATEDVQLGDTTITAGDGVVISGLAADHDPTVFTD  
PNQIDLERGARHHVAFGFGPHQCIGQTLARLELQIVFDTLFRRIPTLR LA  
APLDDIPFKSDAI IYGAEELPVAW

>CYP244A4 (2550291184) *Salinispora arenicola* ATCC BAA-917

YLGRHAWVVCDELVKQALTHPKMGKDIALVPEWMRQPGMLMVTAQPDPEY  
ARAMIMSDGENHARIRRIHAPVLSPRNTERWGERVADKVEGFLDELSRAG  
SGGSTEVNVVTNYTHKIPLAFISEMLGLPPEAEHRLRGITDIMLYSSDYA  
ARREAI GGLFGAVEDWVRNPADLRDGVITGLLAASDGPDAAVTEGEVIVW  
TLGMIITGYETTGLISTSLYEAIRRPPHERPKTDEDITAWIEETLRVHP  
PFPHTWRFPLEDIELGGYLIPKGAPVQVSI AAANRKPGE GADSFDAERR  
GHGHL SFGLGMHYCIGAPLVRLEAQIAVRGFLQRFPRARLSAETAPQWES  
EWMIRMSVLPVAVLS

>CYP208A12 (2550291209) *Salinispora arenicola* ATCC BAA-917

MTLDTITPRVPLGPRTAALRMLLVMKRDRLGMLTSAAARYGDASRLPVG  
HKALWFFNHPRYAKHVLADNSANYHKGIGLVHARRALGDGLLTSEGDLWR  
KQRKVIQPAFQSRRIAQQAGMIAEEAFALVERLRARAGAGPVELTAE L TG  
LTLGVLGRSLLDADLAGFDSIGDSFATVQDQAMFELETINAVPMWIPLPR  
QIRFRRAR RKLQAVVDTLVDGRAGNLADRVDVLSRLILSARGEADPRVGR  
ERLRDELVTLLLAGHETTASTLGWTL SLIDRH PGVWERLHAEAVEVLGDR  
LPEYDDLRLRLRYTVMVVEEAMRLFPVWLLPRRALAPDTIGEYRV PANAD  
VVISPYTLHRHPEFWPNPERFDPERFAPGQAADRPRYAYLPFGAGPRFCV  
GNNLGMMEAVFVIALLCRHLRLTGVP GHRLVPEPMLSLRIRGGLPLVVRP

VS

>CYP107Q4 (2550291692) *Salinispora arenicola* ATCC BAA-917

TAGHQTTTTYLIGNSVILLLENPDQLARLKENPSMWPQAVRELQRLGPIQF  
AQPRFPSEDIELGGVTIPRGAPVAPLLLLAANTDPRRFPDPNKLIIDRLAV  
GSEGHLLGFGKGIHRCLGQHLAYQEAEEVALQGLFTRFPDLSLAVPREEIPW  
ILRPGFTTRTRLPLKLV

>CYP105CH1 (2550291726) *Salinispora arenicola* ATCC BAA-917

VSSLPLPTYPKLRDPADPLLPAPAEYLAIQSEKPIAKVLLPSGRPTWLITG  
HALARQVLTEPCVSVDRRHPNFYPVPNPDAVVAQVARWTYILLGDDPPL  
HTERRRLLI SEFTVRQAQAMRPRIQQLVDFHLEQLIAAGPGADFSKHFAM  
KVPSAVICEMLGVPFADHDYFQERTALQLRRDVPVAAQKQAIDELLAYFE  
QLIQEKSSHPGDDVLSRLIVSNRETEAFDHEALVALGLLLLVGGHETTAN  
TLTLATATMLERPEIAEQLRDTPSLMPSAVEEFLRYFSVAVAVSRIATAD  
LQVGGQLVRAGESMLLVNLTARDGTVFPEPHRLDIRRNARNHLAFSHGI  
HQCMGQNLARVEMQIALDTVLRRLPGLHLVTPFEELPFKYRHLVWGI EEL  
RVAW

>CYP154M15 (2550291987) *Salinispora arenicola* ATCC BAA-917

RGDKTHLSFGYGYPHYCLGAGIARMVATIGLSMLFERFPDLSLAVPVTELK  
RLPTFIMNGHQTLPVRLTAHAR

>CYP105W2 (2550292427) *Salinispora arenicola* ATCC BAA-917

MTGYQDRPTGDQPGAPVPSGSTDPGIGAFPLPRRCPFSPPAEYARLRAEH  
PVVRLPMLGGDTAWVVS RHADVRQVLS DPRMSADRRRP GF PKFAPTTEGQ  
RQASFANFRPPLNWLDPPEHAICRRQIVDEF SVRRVRQSRALVERVVDTH  
LDALTAAPGADLVSTFAYPVPSQVICEVLGV PYGEHEFFERRSTLMFRR  
STPADERAR CAREIRDFLDVVVTDREHRPGDDVLSRLLYRQRR

>CYP1051A1 (2550292648) *Salinispora arenicola* ATCC BAA-917

MATDAAITRARTVPAWKALPAAVRDTHR ALVDVGNWSDGDVVRVSLGVSR  
PYLVTNPAHVQEVLHERAAIYPRGDDTALWRSVRKLVGDGILAEGDAWAA  
SRRVLAPMFRPARINAMVDTMADAIAGAVDGLHGAATAGTPIDVGRELSR  
IVCSAIMRVFFADRITVRDALRIMKAQETIVTAMAPRILAPLVPWWIPMP  
GDRRFRAAVRSIDDILLPVLRQAQRQPDDGDDL SRLVVRARADDGQALSE  
KMRRDDLVSMVAVTTETSTVVL TWLWPLL ANHPDVANRLYDEIDRVVGGG  
PVRGDHLAELTYTRMVLDELLRLYPAGWILPRRAATTDVLGGVRINKGAT  
VILSPYVTQRMTAWWGPTAEAFDPERFAAGREAADGRHRYAYYPFGVGMH  
RCLGEHLFNLEAILIVATLLSRFRFALTDTSMPGVKVAASTRPARTVEMV  
LKPVAPVPAR

>CYP105BL2 (2550292654) *Salinispora arenicola* ATCC BAA-917

MSSHSAAPDPETATPLHTLAPELAFFQFERSAPFDPPQAYTELSGRCPV  
APVSMADGKPSWLITSFEGVRTT LSDPHFSSDMSHPGFNRTGKPVDDL  
KDTLGAMDGERHRYRRLTGELTVRRAKAMRPVITQITDEALDQLAAAG  
PGADLVKHVAFVVP SRVACHLVGIPLSDYELFTGMAATLMDSTSSDDQFA  
ALQNMVSYFDTLVTDREHHDRDDLGHMVRRYLATGELTRDMLIRLAWTT  
MAAGQETTAHMI GLGVAALLRHPDQLELLRREPHLLPGAVDELMRYLPLI  
QFGIPRVAMDDVEVDGQTVTAGEGVVALPPLANRDP AVFERPDELDVRRN



ARQHLLTFGYGPHQCPAHALARLELEVYGRLLERFPTLRLADSDADLKVQ  
DKDIMYRVSELAVTW

>CYP105J3 (2550292749) *Salinispora arenicola* ATCC BAA-917

APGYRPLAVQRPLAQVTLYDGRRVWAVTTRDLARRLLVDPRISSDRTNPA  
WPAIVPIVAAVNDAQQKVLKIATALVGTGPEHKAQRKMLIPSFTRRM  
NALRPMIQEIVDQQLDEMIKSGAPTDLIPAFASAVPVTVLYRLMGIPDDD  
HGIFEKLSHQLLAGPNANEAYDQLMGYMSRLIAERRRNPGEGVLDDLLAQ  
HGANDDADHDELVSTLVVQVAG

>CYP105W2 (2550293871) *Salinispora arenicola* ATCC BAA-917

LLVAGHVTTSNMLALSVLALLTHPARLARLRAEPPERFPAAVEELLRYFTV  
VEAATARTATAEVTIGGVTTAAGEGVVALGQAANRDPVFEHPDEFDPDR  
DARAHLAFGHSRHICPGQHLARLEMEVALSRLFRRLPGLRLTMEVSDLPL  
KEDSNIFGLYALPVAW

>CYP107Q4 (2550294304) *Salinispora arenicola* ATCC BAA-917

RAWGDSMATMNGERIPPTLVKCIELARELIAKRRAEPQDDLVTALVQAQA  
EDQNRVSDDEIIGILF

>CYP245A7 (2550295164) *Salinispora arenicola* ATCC BAA-917

MPSATLPRFALTGWSRENIVNPYPVYQRYREVASVHRGEPGGDAPDTFYV  
FSYDEVVQVLSSNCFGRGRSLDAAKASVPVPAEQKALRAIVENNLVFMDF  
PRHTELRSLLNRSFSPRIVTELRPRIARIAQELLSRLGQQVDVDLVESFA  
APLPILVISELLGIPEERRAWLRANALALQEASSSRAGRDVDGYARAEVA  
AQEFTEYFREQVRLRRGRAGGDLITILANAQERGAPVSLDAIVGTCVHLL  
TAGHETTTNSLAKAVLALREHPAVLDELRGAEGLTTDAVEEFLRYDPPVQ  
AVTRWAHQD

>CYP107FS2 (2550295471) *Salinispora arenicola* ATCC BAA-917

MPVPQGEQNLTTTEVFADPKALFATLGSRQPLHRISLPDGMFAVLVTGNRE  
ARQALSDPRLVRSITAAAPELHKYHPLASDDYALSRHMLFADPPDHGRMR  
KLVSTAFTRRRVEQMRPRIQQITDDLIDVIAAKGEADLVETLALPLPIAV  
ISEMLGVFPFADRSEFERHAEVLGTINASSGFDIAAAGRWFDEYLAGLVQ  
QRRREPQDDLISGMLAAQDKGDRLTDVELRSNALLLSAGFETTVNLIAN  
GLLALLRHPEAMAAALRSEPNLMTTAVDELLRYDSPVSCVTYHFAQEPVEI  
GGFEIRSGEHVVIAAAAAANHDPTVFAPSRDLRREGSGQILSFSGIHF  
CLGAPLARLEGEIAFGTVLRRLAGLRLAVPTDSLWKASFVLHRLERLPV  
TFTPDRDPNPIDSVHTV

>CYP105CN1 (2550295472) *Salinispora arenicola* ATCC BAA-917

MAAPAPQATPSTTPHPPSYPLPRECPYRPSAGTAHLRDAGPVSTVRLYDG  
RTAWLVTGAAEARALLADSRVSNRADFPNYPVMDERHLSMRATREMAREE  
EGGFAAALFGMDPPEHTRQRQQLLPRFTVRQVAARRPAIQRIVDEHLDAM  
EANGSPADLVSAFATPVPTMVVCTHLGVYPYQDRTRFEPVAGLFEPDRAD  
AAMAELTAYLHQLIETKQSEPGDGVIDHLIANHLRPGAIDRAELVAIASA  
ILVAGTVTTSSAIALGTLALLTAPGQYTALVDNPDLPVGAUNEILRYLSL  
VEQLARVATEDIEIGGKLIRAGDGIIVSFAAGNLDPNVTTHPDRLDVALP  
PTNHAFSGHIHHCIGQNLALLELDIAFRALVSRFPTLRLAVPAEQLPY

FAGDVPRLACLPTW

>CYP105CP2 (2550295474) *Salinispora arenicola* ATCC BAA-917

MTKSMPVQDLPAFPIPRECYPYRPSAQHVSLRSGGPMKVRLYNGRTAWLV  
TDSAHARAVLSDYRRVSIKPYHGNYPLLNEEFKVVDSGYADVLFVGDPP  
EHTRQRMIMPSFTLRRTAVLRPDIQRIVDDKLDEMRRHGAPGDLVTEFA  
QPVPMSVISFLLGVFWEDHEEFETPAHKLFVPELAEEATELGAYLERLI  
QKKEQPGGTPGGTGLLDDLRDHLRAGALSRLDELVHIAMAMLVAGTDTT  
NVISLGLTALLDNPDQWAAALRDNDELIPGAVEEILRYTSLIEAFARVAV  
SDIELNGAVIKEGEGILISSAGVNFDPALAPDPGRFDIRRPPRPSFSFSH  
GIHRCPGDNLARLELEIAFRSLVTRMPNLRATAKPIDQIPSNNDGTLQRL  
YELPVVW

>CYP211B2 (2550295749) *Salinispora arenicola* ATCC BAA-917

MDVSEAI AVLISPSGRLDPYPTYEQ LRAHG PVSQTTAGLFVVTGYAEADM  
VLRDPRFVVLDDDLRDDVFPHWQDSPAIKSIARSMLRTNPPDHSRIRRLA  
AGAFTPRRVAAMREVVTQADELVDLMIRAGRDGARVDFMDMFAYPLPVA  
VICALLGVPAADRSRFRRWAGDLTGILEPEITPEELAGADAGADELRDYF  
TGLIEQRRRAPADDLTALVQAHDADGDRLSGEELLANLVVLLVAGFETT  
TNLLGNGLVLLTRPEAAAAALRDEPD LAPGYVDELLRYDSPVQLTTRTVR  
ESVSFAGTELPAGSWLLVLLGAANRDPRRFPDPARFDPGRAQSQPLSFGA  
GPHYCLGAGLAR

>CYP1198B1 (2550296193) *Salinispora arenicola* ATCC BAA-917

MSGELTDQRTAPGAGGNPLRSLMDHGIRANPYPLFGELREAGPTAVEDGS  
VVLFG EYEHCSQILRHRDMGSDTSEAPSIKGFVVDDAERAGSSIFFMDQP  
GHGRQRKLVS KSFTPRIVKSFGPQITHIVDGLFEDFRDKGELDVVTDLAY  
PVSIGIICDLFGIPDDERDMLKEWSDDLALSTELPTLGAAIGVLNVFTRD  
EINRFGSVAMAAHAYFADLIHRRRKNPGDDLVSLLATESNGERLTRFEV  
TSVLATLFVAAHESTTNLISGGILALLRNQDQMAVLRENPGITNVVDES  
LRYDPPVHLAARMARARTTIGGYDLDPGTIVVVLMAAGNRDPRAYENPDV  
FDVNRKIRNVSLAFGAGAHFCIGSGLAKLEAEIAISAFQRLKHPEVDES  
SLEYRRHIVVRGLEHMKVSFQP

>CYP107EU1 (2550296197) *Salinispora arenicola* ATCC BAA-917

MVNSDPPDHTRLRHLVGREFTGHRVEGLRPRIEEIVDDLDDGVAACGDEA  
DLAETLARRLP IAVIGELLGVPEADRAEFFRWADTLYGGTASPEALGQAY  
NAIVDYLGRLCDAKRDVPADDLLTALVQVSADEDRLSREELVSMALLLV  
AGHETTSKQISNGVLALLLNPEQLKLLKAQPARTAGAVEELLRFEGPSLS  
ASLRFTTEPVEVAGVVIPEGEFVLLSLASGNRDPEKFPDPDRLDITRSTQ  
GNLAMGHGIHHCVGAAALARLELEIVLIRLVARFPQMQLAVEADDLEWLVN  
SFFRAPLHLPVSLRR

>CYP125A41 (2550296387) *Salinispora arenicola* ATCC BAA-917

MTEPRIPAGFDFTDPEVLAHVRVPREEFAELRRTAPVWWNAQPRGSAGFDD  
DGYWVVTRYADVMTVSRSDTYSTRENTAIARLRPDTTREDIEMQRVIML  
NVDPP EHTKLRAIVSRGFTPRAINALRGSLAERA EHIVRDAAVRGVGFV  
TDVACELPLQAI AELIGVPQHRRKVFWDWSNQLIGYDDPAYGTDPLTASA  
ELLAYAMEMAERQ RSPSDDLVTKL VNAQIDG EHLTTDEF GFFVM LLA  
VAGNETTRNAITHGMVAFLDNPEQWELFKAERP KSAVEEII RWATPVNVFQR

TALVDTVLGGQAI SAGQRVALFYGSANFDEAVFEDPERFDITRSPNPHLG  
FGGSGAHFCLGANLARLEIELIFNSIADHLPDIRKVAAPQRLRSGWINGI  
RQMPVRYR

>CYP211C1 (2550296523) *Salinispora arenicola* ATCC BAA-917

VAVGYDLVGAVLRDPEWSKAPPPGWTEQEILRTLQTSMMFINPPDHGRMR  
HVFAGTFTPRRLGALEPVVNRVADELDRMADAGAGGLDFVAEFAYPLPA  
RVMAEFIGIPETELDWYRERVDVIDAFLDVAGKTPQRLAAANAAGAE LRA  
FYGELLARRRRTPGEDLISGLVEAVDAGGVELTEDELVSNLIVLFNASFV  
TTVYMLSNGLPVLLAHPEVAAALATDPV

>CYP105AB8 (2550296688) *Salinispora arenicola* ATCC BAA-917

MTETASSRLTDTEFPVQRECPFAEPVEYEQIREQSSIAMVRLTGGGEAWW  
ISGHEQGRAVLADRRFSSDRKANFPFVSTDPAIRKRLHAQPLSLISMDG  
AEHTQARRALIGEFTVRRLAALRPRIQQIVDQCIDEMLTDDQHCADLVKT  
LSLPVPVSLVICELLGVYPYADHDFEQEHTATLVRRNTASEVRQHSIDELNA  
YLGALIDRKLASPDDDLGRQIARQHRDGTFRSSMVSLAFLLLVAGHET  
TANMISLGVVGLLQHPEQLAMIKDDDPDKTPLAIEELLRFFTIVDSVTSRV  
ATEDVRFGDTTINAGDGVVVSGLSADWDPTVFADPDRLDLERGARRHHLAF  
GFGPHQCLGQNLARLELQIVFDTLFHRIPTRLRLAAPLDKIPFKTDAAIYG  
ARELPVAW

>CYP154M15 (2550296740) *Salinispora arenicola* ATCC BAA-917

MNDKCPFAALDVTGQDLHGEEAARLREQGPAVLVELPGGVKAWSINRYEVI  
RELLMDRRVTKNARKHWPAFIKGEIPPDWEMISWVAMDNMVTAYGKDHVR  
LRKLVGRAFTQRRADALRPQVVALSTKLLDDL GATPPGEVVDLRRERFAYP  
LPAMLVASLIGMSEAAQAACSKVIDMMVHTNVSPEEAQAVLRGWRAAMAD  
LIESKRRTPGEDITTDLIAAREEDGSRLSEAELADTIFAILGAGSETTIN  
FFDNAITALLSRPGQLQLLRTGGVTWDDMIDEVLRVESPLAHLPLRYAVE  
DI

>CYP245A7 (2550296933) *Salinispora arenicola* ATCC BAA-917

GCDIPGRSRVVALLSANRDPARFPSPDVLDVRRPADRHLSFGLGIHYCL  
GATLARAELEIGLQALLDGVPTLG YGTQHVDYADDLVFHGPSRLVLVNLG  
ERCT

>CYP248A2 (2550297291) *Salinispora arenicola* ATCC BAA-917

VLADAVTAFDPTAVDVRRDPYPSYHWLLRHDPVHRGAHQVWYVS RFADVR  
AVLGDERFARTGIRRFWTDLVGPGLLSQIVGDIILFQDEPDHGRLRGVVG  
PAFSPSALRRLEPTIEATVNDLLRPARALGAMDVVA

>CYP248A2 (2550297325) *Salinispora arenicola* ATCC BAA-917

GAANRDPGRYDRPDELDIRRDPVPSMSFGAGMRYCLGSYLARLQLRTALG  
AMVALPDLRLVCNPNELAYQPRTMFRGLTRL PVAFTPAG

>CYP107Q4 (2550297801) *Salinispora arenicola* ATCC BAA-917

MTTTAETSAETIDLFSPEVVADPFGWYARLREETGPTTGTLNIGTMMGGPEMWLVTRYEDVRQVLTDPRFLTNP  
ADSPLEDIRAGVFKRLDFPPDLIPW

MANLLNVSDGEDHTRLRKQVSYALTAHRIGKLRPRVEKITADLLDKLAED  
GKDGSPVDLVEEYCYPLPVTVSLRAGRHR

>CYP105G5 (2550297802) *Salinispora arenicola* ATCC BAA-917

LTIIETTETPPADDSLRAPLPRQFMQRDDPSKLPALAAAEQSPVGRSTL  
PDGDPFWMVSGYDEARAVLSDFRFSDDFRYHPRFKKLSGQLGERLRNDK  
ARAGSFINMDPPEHTRYRKLLTGQFTVRRMRQLTVRIEQIVTEQVDVMLA  
EGNSADLVSAFAVPVPSLMICELLGVRYEDRTEFQRRRAAGLLQTDLPKQ  
AVENLEAQRAFMQRLVTDKRRTPADDMISGLVHHAGAEPPLTDEDELVGIA  
TLLLFAGLDTTASMLGLGMFMLLQRPEQMAVLRDDPSRIGDAVEELLRYL  
TVVSTGLFRFAKEDVVLGDEHI PAGSTVVVSLMAANRDGRHWPEPETLDV  
TRVRSSHLAFGHGVHQCLGQQRLARIELTVGITELLRRLPNVRLAVPPADV  
PLRNDMITYGVHRLPILWDTF

>CYP154M16 (2517964207) *Salinispora pacifica* CNT045

MPDRCPVLDPSSGRDIHAEADRLRAQAPAVKVELPGGVHAWISITSYDVVKR  
LLLDRNVTKNARNHWPKFINDIIPPDWEMISWVAMDNMVTAYGKHLVRLR  
RLIAKAFTAQRVETVRPQVEKLVDELDDGLAAETGEVVDLREKFCYPLPA  
LLIAELIGMTEQQRAQTAKAMDLMVDTTVSPDQAQAILTGWRTAMDELIA  
AKRREPGKDIASDLIAARDDENGGQLTDSLELDTIFAILGAGSETTINFL  
DNAVTALVTHPGQLELVRSGRAGWDDVIDEVLRVQCPLASPLRYAVTDI  
ELDGVTIPQGDPIILINYAAAGRDPALHGDGTAGEFDVFRNKEHVSFGHGP  
HYCLGAGIARLVATIGLSRLFERFPDLRLAVPVEELQPLPTFIMNGHRAL  
PVRLVPAPAAATAV

>CYP208A21 (2517964219) *Salinispora pacifica* CNT045

MTTTSIDRRRPPGPPRAAALSMLLTMSRDRLGMMTAAARAYGDAAWLPGV  
HKALYFFNHPDYAKHVLTDNSDNYTKGIGLVHARRALGDGLLTSEGELWR  
EQRRVIRPSFRSGRAPDQASVIAEEVASLVERLRARAGGPPVNVVTEFTG  
LTLGVLGRITLLDVLDTALATVGDAFAAVQDQAMFELVTL SAVPTWIPLTR  
QRRFRRARAELEIRIVDDL VAGRGDVSGRDDVLSRLILSTGAEPDARVRQ  
RLRDELVTLLLAGHETTASTLGWTLYLIDRHPPVRERLRAEAVEVLGDRL  
PAYRDLPLRFTTMVVQEAMRLYPPVWLLPRRSRRADRVGPYRV PAGSDV  
VVSPYTMHRHPGFWEPEPDRFDPLRFDPRNAADRPRYAYLPFGAGPRVCVG  
SNLGMMEAVIAVAMLCRELRLVRVPTHAAVPEPMLSLRIRGGLPMSVHLA  
D

>CYP107AX9 (2517964232) *Salinispora pacifica* CNT045

VTAQPAPVFDQRLRLRDPHRRYNALRDQAPVHRVRTPDGAPAWLVTRYDDV  
RAAFIDPRLSVDKRFSGTDGEHGSSLPPELDAHLLNRDPPDHTRLRLRLAA  
AAFTPRRVADLRPAVEKTVSTLLDGLAGNDHAELIGSLASPLPLQVMHEL  
LGLPTQTSVDFRTWTNTLLSADANQPAQSRSAMANMRRFLIEQVAHKRAQ  
PGDDLLTGLLCVREDDDGLTDEELVAMLFLLMFAGYDNTAALIGNVIHAL  
LTNVELAEAVRTGSLAVDELVDGVLRWNPSFPLAVRRFAREPITIAGRTI  
PAGDRIWLCLASANRDP AHFTEPDEIGIADMRRPHLSFGHGIHYCLGAPL  
ARLQTTVAVASLFD RFPGVRLAVPVQDIQWRESFRLRGLVALPVSL

>CYP107AW6 (2517964245) *Salinispora pacifica* CNT045

VETVTGTSAPPPVPYIADPYPTLARIRANGPVSILHSDEGVPMWVIARYR  
EVRAALADPRFGQDARRAQALADNRVAGVTLGGDIVHMLNSDPPDHTRLR  
RHVQGAFTARRVAAMRPLVERITTSLLDGLAGRKTVDLVQDLAFPLPMLV

ICELLGFPAEERNAYRSWSTAILTHDDDPVAFATALREMTDYIAVQLRLR  
RSRPGDDLLTELLAARDAGQLTDDEIVGMVFLLLIGGHETTVNLLGTATL  
ALLRNPQHRWLLANGHALPEAIDEFLRYESPVAMATLRFTTTPVTVDV  
VIPAGELVLVSLGGANRDPDRFPDADRLILDRRDTGHLAFGHGLHRCLGA  
FLGKLEGEVALGALLRRHPKLALATEVRQLQWRDTIMLRGLESLEPVS LHG

>CYP245A11 (2517964335) *Salinispora pacifica* CNT045

MSSTTLPRFTLTGWNREDIVNPYPVYRRYREVAAVHRGEAGGDAPETFYV  
FSYDQVAQVLSSSCFGRGRSLDATAASVPVPADQKALRAVVENWLVMFMDP  
PRHTELRSLNRSFSRIVTGLRPRIARIAQELLSRLGGQVETDLVEGFA  
APLPILVIAELLGIPAGRHWLRTNALALQEASSSRARRDTAGYARAEAA  
AQEFTEYFREQVRLRRGSTGDDLLTILANAKLRGVPVSLDAVVGTA VHLL  
TAGHETTTNSLAKAVLALQAHPAVLEELRGADGLTADSIEEFRLYDPPVQ  
AVTRWTHQDRTLGGWEVPRGSRVVALG SANRDPARFPLPDALDVHRPAD  
RHLGFGGLGIHYCLGATLARAELEIGLQTLNGLPTLGYPAQYVDYADDMV  
FHGPSRLILVNPGERFCQ

>CYP244A5 (2517964339) *Salinispora pacifica* CNT045

MSATTNAELGEAPETSMPIDPGLFDCMPDLIAAARIAPVVRIPYLGRHAW  
VVCDELVKQALTHPKMGKDIALVPEWMRQPGMLVTAQPPPEYARAMIMS  
DGENHARIRRIHAPVLSRPNTERWGEQVADKVEGFLDELSKAAAGSNAEV  
DVVTNYTHKIPLAFISEMLGLPPAAEHRLRSITDIMLYSSDYAARREAIG  
GLFGAVEEWVRNPDGLRDGVITGLLAGSDGPGAAVTEGEVIVWTLGMIIT  
GYETTGSLISTSLYEALRRPPHERPRTDEDITAWIEETLRVHPPFPHTW  
RFPLEDIELGGYLIPKGAPVQVSIAAANRQPGEGADSFDAERRGHGHLSE  
GLGMHYCIGAPLVRLEAKIAVRGFLRRFPQARLSADTAVQWESEWMIRRM  
SSLPAVLS

>CYP211C6 (2517964690) *Salinispora pacifica* CNT045

VPDIEGLLTRLYSAQGRQDPYPVYADLHAQAAIAALEPRPERQRVAAVAV  
GYDLVAAVLRDPDFWKQPPPDWRDQEILRILQSSMMFINPPDHGRMRHVF  
AGTFTPRRLGALEPVINRVTDELLDRMADAGPGEVDFVAEFAYPLPARVM  
AEFVGIPATELAWYRERVDRVDAFLDVAGKTPERLAAANAAGAE LRSFYR  
ELLAHRRRTPGEDLISGLVEAVDAGGVELTEDELISNLIVLFNASFVTTV  
YLLSNGLPVLLAHPEVAAALASSPELAAGAVDEILRLQTPVHLLARAAPR  
DMVLGGVSIPOGQSVLLLLIAAANRDP AHFPDPDRFDPRRSSPPSLAFGLG  
LHYCLGAAVSRLEGRALPRLLSRFPRLRILEQPVYSGSLFLRGIDKLSV  
SPGGREHP

>CYP125A66 (2517964820) *Salinispora pacifica* CNT045

MTEPRIPVGFDFTDPAVLERRVPREEFAELRR TAPVWNAQPKGSAGFDD  
DGYWVVTRYADVMASRDSETYSTRENTAIARFQPGTTQADREMQRVIMI  
NVDPP EHTKLRAIVSRGFTPRAINALRGSLGERAERIVRDAAGRGAGDFV  
TDVACELPLQAI AELIGVPQHRRKVFDWSNQLIGYDDPAYGVDPLAASA  
ELLAYAMEMAHERQRNPSDDLVTQLVNAQIDGEHLTADEFGFFVMLLAVA  
GNETTRNAITHGMLAFLENPEQWELFKAERPRSAVEEII RWATPVNVFQR  
TALVDTALAGQAI SAGQRVALFYGSANFDES VFEEPERFDITRSPNPHLG  
FGGSGVHFCLGANLARLEIELIFNSIADHMPDIRKVADPQRLRSGWINGI  
RELPRVRYH

>CYP162A8 (2517965916) *Salinispora pacifica* CNT045

MISPDLSDPFTFYQNGDPLPVWAE LRREHPVYDNRRADGTRI WAVMTHKLC  
TDMLTNPKVFSSANGMRLDSNPRVLARAAGKMLNVTDP PQHDKIRKLVSS  
AFTPRTIRRLEANMRATAGRAIDTAIADGGCELTRLAHKLPVSVICDLLG  
VPEQDWDFMAERTRFAWGSTAADDREEVEKVA AHTEIMAYFLDLAADRRK  
RPMEDLVSALVHGEVDGRSLTDEDVLYNCDALLSGGNETTRHATVGGFLA  
FVMNPDEWSAIRQNRDLLPSAIQEIVRYTSPVMHSLRTATRDVEFGGINI  
RAGEYVVAWLPSANRDEQLFDDPDRFNIRRS PNRHLGFIQGNHYCIGAGL  
ATMELRVMFDELLNRVSEVRLAGPARRLR SNLLWGFDSL PVTFFHVGAGR

>CYP211B19 (2517966055) *Salinispora pacifica* CNT045

MDASEAVALLTSPPGRRDPYPTYERLRAHG PVVATAAGFVVTGYTEADTV  
LRSPRFGVMDDEERDGVFPHWQDSPAMMSISQSMIRANPPDHSRMRRLAA  
GVFTPRRVAALREVVAQADELIDELIRAGRG GAPVDFLGSFAYPLPVTV  
ICALLGVPAADWAQFRRWASELTAVLEPEITPQELAVADAGATELRDYFT  
ELIAQRRRDPADDLT TALVQAHAAGDRLSGEELLANLVLLL VAGFETTT  
NLLGNGLFVLLTHPDSATALRGQPELAPSYVEELLRYDSPVQLTSRTVRE  
SVTLGGVELPAGSWLLVLLGAANRDPARFTD PARFDPGRAQSPPLSFGAG  
AHYCLGAGLARLEAQVAFPLLLRRLPELSLAGEPVRRSRLTLRGYETLPV  
TVGAVAADHGTPAGAALGTP

>CYP107CL2 (2517966583) *Salinispora pacifica* CNT045

LQITPEFMHDPYPVYVGM RDSAPIHLS DANAGRTW FVPRYHDVIDVLRDD  
RFS AALKAPAFINQFPPEQRAQFQPFNQSIAGWVVLQDPPAHRQLRQLMN  
KGFTRLHVAALRPKVTEIATGLVD TMATRRSGDFMTDFAQFPFAAVIATM  
FGVPAADLSAFISWSDDIVLFA GSLRPTVEVARAAQHGLLSMTEFFRQLL  
PQRRADPGDDVISLLVSVRDNGEQLTDEQVLANCAQLIVAGHETTRNLVA  
NGLWTLSSHDPQLAKLRADPSLMTSAIREMMRFESPLQFVRRVARDDFDY  
LGVRIQAQDGVVMTLGSANRDPAFFTEPDRFDITRNPTGHVALGYGPHIC  
LGAALAEMETEVALGLLLERFPDLRAVDEQPERVMNPMLRGFAELRLSW

>CYP1056B2 (2517966592) *Salinispora pacifica* CNT045

LRHVDFLSPELGDELWRVVFARYRREQPVVWVSSVRMFCVFRHADIR TALT  
SPDFTVDYPFRVSRQVFGPTLLDFD GTRHTILRRRLGGLLVGRDDNVAFT  
GPIERSVADVLDGLDG VAGFDFVPTVARRLPEAVTAAFLGIPQADREWVY  
AHLRYLLDHLDGSSRDFAVATELRREVSALVGRL LADPGQAEHTVLGR LG  
NARRAGELDPEDAVGMALLVLAAGVETSTGMLANTMATLARFPRWATAGR  
DDDAVLGRVVREVLRWQPPQMDTVRFARRDTTLAGVPI PAGRPLKLLLAS  
GNRDEDVFTEAEFFRPDREERASLSFGHGAHSC LGTHLAVAVATRFFAAF  
LRRHPGATVPGPVPPIGGWTFRQPVTL PVRLGGPD PVGATATEGGQR

>CYP105BL1 (2517967083) *Salinispora pacifica* CNT045

MSAHPAATPD SGPA PSLNELTPELTYPQFDRPNPFDPPETYTELSSRCPV  
APVRMPSGQSSWLITSFEGARKVLS DPRFSADMSRPGFPNLNDKPVDVVL  
KDTLRHVDGEEHMHYRRTLTGEFSVKRMEALRPVITQFTDDALDQLAAAG  
SGADLIKHV ARVVPSRVVCHLIGVPFSDFEFFNEMVSTLMDTSSSADQIR  
SAKQGLDSYFDQLITDREHHDQDDLLGRM VRRYLATGELTREEVAELAWI  
TLAGGQETTPHMI GLGVATLLRHPDQLKLLQQEPALLPGAMDELLRYLTV  
VHLGMPRVAVADVEIDGQTVAAGEGVVAL LPLANRDP SVFERPNELDIRR  
NARQHLTFSYGPHQCPGH TLARLELEVVFGR LMERFPNLRLADENTELKT  
RDKAIVYGLTELAVAW

>CYP163B20 (2517967117) *Salinispora pacifica* CNT045

VTATEAKYVGQVGNRNVASTIDLADPATFAGHDLTNFWQRLRDEEPIYWN  
PPTGGRRGFVLSRHADILEVYRDDMTFTSERGNVLVTLLAGGDAGAGRM  
LAVTDGPRHAELRKLLLRALGPRVLGPVCRAVRANTRQMIGEAAAANGECD  
FATDIASRIPMITISNLLGVPEADRASLLKMTKTALSADDESISDSTDSEM  
ARNEILLYFQDFVEFRKNPGEDEVVSMVLVNSSIDGVPLSDDDIVLNCYSL  
IIGGDETSRLTMIDSINTLAANPGQWRRLKEGRCDIDKAVDEVLRWASPS  
MHFGRTAVRETVIHGERIQVDDIVTLWGASGNRDERAFKRPEVFDLDRAP  
NRHLSFGHGPHYCIGSYLAKVEISELLIALRDLILGFVIGVFPQIRSNL  
LSGFSTMPVRFADRTGLASEAREG

>CYP113R3 (2517967173) *Salinispora pacifica* CNT045

MTSSAGQKDPSEELFSWLRTMLETRPVYRDEENGWQVFGYADISRTLADT  
TTFSSDTARAFNPPQPDLDFFDMGNLVTDDPPRHRKLRSVISSMFTPRAV  
AGLSARIERITHSLDSVDGEERFELVETLTLYALPITVICELIGLPMQDE  
PLFRVWGDALGTIDAATVPPEQLENEVAPAIREMNEYLLAHARKRRRQPA  
DDVISRLANAKIDDRPLEDGEIVGVIGLTMFAGHATTMALTGNAVLLFDS  
HPEVDAAVRADRDLLPGAIEEILRLKPPFPRLARITTTDTEIGSHAVPAG  
ELVTPWIAAANRDATRFPDPETFDIHRNTGGHLVFGQGSHFCLGAPLRL  
EGRIALNALLDRYAKISIDHDCGLEFENPWQLISPRRLPVAVKPL

>CYP1005A8 (2517967384) *Salinispora pacifica* CNT045

VSAVLFRSWTKTVGTHWPAVTRVADQQGTEHLVVTEHELVRQVLTQVQTY  
RPDNALDAVTPIPVPAALRVLAGHRFRLPPTLANNGGVSHPAIRALVADAL  
HPAKVAAQRPWLTKLVAERVAAIGATLDSGGAADLHAELSADLPLLVLAR  
LVELPDAPVSAVKQFARAALALFWAPLDADRQLALADEVGRFHQVLRIFA  
DTGGGLAAALRATGHPPDVLVGALFFLLVAGQETTSQFLTLLHRLAGEP  
AVRAALRDGDVSVANVVEEGLRLEPPIVWRRVAAVDSTLGGTAVPAGTS  
VLLWLARAGRDPAIVPAPDEFPRPGQGRSRRHLAFGAGAHRCCLGDQLARME  
AAVVVEQAAPLLDGISVVRAPWYPDNLTFRMPDAFVIRR

>CYP107AY7 (2517967745) *Salinispora pacifica* CNT045

MRAEPAPIPRSGARLGQEYDQLRKTDGVHQVLLPDTSLAWLVTSPELVSR  
ALADPRLALNRKHSRGGWSGFALPPALDANLLNLDAPDHTRLRLRVGPAF  
SPQ RVAALRPRIERTAAELVDVTVVATGSPVDLVTGYCTPLSVQVIADLLG  
VPEAGRTDLRAWTDMLTSYPPDRDAIRQAVVELHDYVVNLIEAKQQRPG  
DDL SALVATEQEGDRLTRDELTSLAFLILFAGYENTANLIASTVLRLLD  
HGSLRGVRASEAIEETLRLEPPAPAAIRRFPIEETTIGGATIPAGDTVLL  
SIAAATRGTDGNSARLAFGNP HFCLGAALARVEAEEAITVLARRLP SLA  
LAVPGAPVRWRPTFRTHGPAELLVTW

>CYP107CT3 (2517967958) *Salinispora pacifica* CNT045

MIGASGDRTGQCPIALDHDYADPHPAYRVIKENGKNKPTPIVLKTGMAYL  
PPGLEAWLV TAYEDVEFVLRDPRFRK SIDEAMPLFAAQSGGTVAARGSL  
YNNMANNDPPVHTRLRKPLNAMFTARSVAGRRDVVSAALETLEKVAGSQ  
TFDLVQDFAFPFSISVISRTLGVDPADRGT FHGWVQTITGDAPPEILRRD  
AGLMVEYLRGLIRGRRESAGNGTDDVLTLLATSLAEDEAVAQAYALLAAG  
YETTANLIVTGFLTAAHPEQLRRLWSDPGLVPDAVEEMLRHQSPFNLSL  
YRYVTEPVELNGVRI PRGAIVFLAFAAANRDECRFTEPD SFDITQPHRDH  
LAFGGGIHNCIGKHLARMEAQVAFETLIERCPGLAVHTPDEEFDWKASPT  
FRGLRTL RVGPGPAPGGWEREQ

>CYP105AB29 (2517968776) *Salinispora pacifica* CNT045

MTETASITTPGTSSTTTSGPASGQVTDAEFPVERGCPFSTPVEYEQIRDH  
SPLAKVRLTTGREAWWIAGHELGRAVLADRRFSSDRRRDNFFVSTDPE  
RKQLQDQPTSMIGMDGAHAQARRALMGEFTVRRMAGLRPRIQQIVDQHI  
DEMLSSEQRSADLVEALSPLVPSLVICELLGVVPYADHDFQAHSGPLIRH  
TTPSEVRLRIQEELNTYLGALIDRKVTDPTDDLLSRQIAKQHAAGTFNRT  
SLVSMAFLLLIAGHETTANMISLGVVGLLQHPDQLAMIKEDPEKTPPAVE  
ELLRYFTIADTVTARVATEDVQLGDTTINAGDGVVISGLAADHDPTVFTD  
PDRIDLERGARHHVAFGFGPHQCIGQTLARLELQIVFDTLFRRIPTLRRLA  
APLDDIPFKSDAFVYGAEKLPVAW

>CYP107FH3 (2519092413) *Salinispora pacifica* CNY330

VPIELDEAFVQDPYAVYEKLRAEGPAHRVRMPPGVPLIGGLPVWLITGYD  
AVRAALADSRLSTD LHRIDGLFAQKDPDRSHRGGFSSALASHMMHTDPPD  
HTRLRKLVSKAFTTRAIEALRPRIQQTDELTAELAGHDTV DLLDAFAFP  
LPIRVICLLLGVPVAEQENFRSWSRALVSGHSPEAAATAATEVAAYLGDL  
VERKRHATTDDVLTALVAHDVDDRLTHTELVSTAYLLFIAGFETTLNAL  
GNGTLHMLHRDQWTALRADRALLDNAVEEFLRLESPLKHATFRCATESL  
RIGDAEIAAGDFVLLAIASANDPRRFPDPHTLDVRRPAAGHLAFGHGIH  
HCLGAPLARVEVRMAFDALLDAFPDMRLATDPAGLRWRNSTIIRGLDSL  
VHLNN

>CYP2054A3 (2519092418) *Salinispora pacifica* CNY330

MSISADSEQVQGRFPDPYGAHRDDPYTFLAGLGVFYAPLLDAWCVTRRED  
MVAVLRDDRSFSARDHNPRPAVALPDDVNQMFRTWRGAGAVAVGSLDPPA  
HAKIRDVLNIGFTPARVRAFEPTMRAVAADLADRIGDEPEFDFIADFAVP  
FALEVIGRRLGVPDDYLDRCRTWSEQRIELMMAQGDADHDRLREFARGLM  
EFGEFARSLVRDRVADPRDDLISELLHDGKAGRTLTADEVAVQIPTLIFA  
GHMTCAEALGTIFYQQLRSPGGWARVVDRTIPVGD LVEEGLRFDSPLAGM  
YRTATRDVTVGGIRLTAGSRLLLLYGAAGRDSRAHACPAAFRPGDGSSGH  
LAFGHGIHFCLGAGFARAELRVAVEVLAARMPDLGLAPGRPPRFRPVFPL  
RALTEL RVTRSGGGSGP

>CYP161N4 (2519092423) *Salinispora pacifica* CNY330

VNTVAQLPFTQTHVLDVAPALRLLQSRGKVHRVRTPEGVPAWLVTGHAEV  
QQLLDDDRLSRSDPGGRDGGTALLNKLLGPLADDDHPRLRSLLEPQFTPER  
LEPLRAVVEKLTEQHLDELAARTPPVDLRPTLAMSLPILVLCEWLGVPAE  
DKGRFSVWTQDAAGVQDPERSQRLAELFGYCRQLVAAKRQDPGDDVISR  
LIATAGIGDTEVVALTALLLFGGYETTVARIGTGVL LLLTNPDQWAAVRA  
DPALVPATVDELLRRSMNPNGGMPRFAVTGFEIDGAAIRAGDLVLLNI  
IAANHDETAFPDPDRLDITRPTAGSLAFGYGRHSCVGAPLARMVLRVALS  
RLITRFPDLRLAVGVDELKLRHETLVGGGLVELPVWTWGPR

>CYP211B11 (2519092665) *Salinispora pacifica* CNY330

MDASEAVALLMSPPGRLDPYPTYERLRAHGPPVSTAAGFFVVTGYTEADT  
VLRSPRFGVMDDEERDGAFFHWQDSPAMTISRSMIRANPPDHSRMRLA  
AGVFTPRRVAALREVVAQAADGLVDEMIRAGRGAAVDFMGSFAYPLPVT  
VICALLGVPTADWARFRHWASDLTGVLPELTPQELAIADAGASELRDYF  
TELIAQRRRAPADDLTALVQAHDADGDRLSGEELLANLVLLLVAGFETT  
TNLLGNGLVLLTHPDSATALRGQPELAPDYVEEFLRYDSPVQLTSRTVR  
ESVSLAGVELPAGSWLLVLLGAANRDPARFTDPARFDARRAQSPPLSFGA  
GAHYCLGAGLARLEAQVAFPLLLRRLPELVLAGEPTRRHRLTLRGYETLP  
VTVGAVPADPGTPAEVALGTP



>CYP125A65 (2519093469) *Salinispora pacifica* CNY330

MTEPRIPVGFDFDTDAVLERRVPREEFAELRRRTAPVWWNVQPRGSAGFDD  
DGYWVVTRYADVMASRDSEYSTRENTAIARFQPGTTQADREMQRVIMI  
NVDPPPEHTKLRAIVSRGFTPRAINALRGSLAERAERIVRDAAVRGTGDFV  
TDVACELPLQAI AELIGVPQHRRKVFWDWSNQLIGYDDPAYGVDPMAAAA  
ELLAYAMEMANERQRNPSDDLVTKL VNAQIDGEHLTTDEF GFFVMLLAVA  
GNETTRNAITHGMLAFLEHPDQWELFKAERPRSAVEEII RWATPVNVFQR  
TALVDTTLGGQAITAGQRVALFYGSANFDES VFEEPERFDITRSPNPHLG  
FGGSGVHFCLGANLARLEIELIFNSIADHMPDIRKVADPQRLRSGWINGI  
REMPVRYR

>CYP107AW7 (2519093796) *Salinispora pacifica* CNY330

VETVTGTSTPPPVPYIADPYPTLARIRANGPVSILHSDEGIPMWVIARYR  
DVRAALADPRFGQDARRAQALADNRVAGVTLGGDIVHMLNSDPPDHTRLR  
RHVQGAFTARRVAAMRPLVERITTSLLDGLTGRTTVDLVQDFAFPLPMLV  
ICELLGFPAEERNAYRSWSTAILTHDDDPAAAFATALREMTDYIAVQLRIR  
QTRPGDDILTELLAARDAGQLTDEEII GMVFLLLLIGGHETT VNLGTATL  
ALMRNPDQHRWLLANQH ALPEAIDEFLRYESP VAMATLRFTTTPVAVDDV  
VIPAGELVLVSLGGANRDHDFPDADRLILD RRDTGH LAFGHGLHRC LGA  
FLGKLEGEVALGALLRQH PKLALAAEVRQLRWRDTIMLRGLDSL PVS LHG

>CYP208A22 (2519094762) *Salinispora pacifica* CNY330

MTVIADRGGRIPPGPPVTAGLRLLLLALGRDRLGMMTSAAA EYGDVARLPV  
GPKKLYFFNHPDHAKHVLADNHANYQKGIGLVHARRALGDGLLTSEGE LW  
RKQRRVIQPAFQNRRLAQYAGAVGQEATRLVARLATRV DGPPVDVLDEMT  
RLTLGVLGRTL LLD AELTG FGHVGESFAAVQDQAMFELET LNTVPTWIPLR  
RQRRFRRARQHLQEVVDVLA AERGQAVEGRDDVLSRLIL STRAEADPQLG  
RERLRDELVTLLLAGHETTASTLGWSLHLLDQHPELRERVRHEARTVLGD  
RVPAYEDLHQLRYTAMVVEEAIRLYPPVWILTRKARAEDEIGGYRVPAGA  
DILICPYTLHRHPRFWAE PERFDPERFDPSRTTDRPRYAYIPFGAGPRFC  
VGNNLGMLEATLVLAVLLRDLRLLEGLPGRAVVPEPMLS LRVRGGLPMTVR  
RVD

>CYP105H11 (2519095246) *Salinispora pacifica* CNY330

MIDTAGQLVVDFPLRKEGESFPPPRYAEYRQRDGLVLSYLPDGKPVWLVT  
RHAAVREILTSRKVSSNP DHKGFPNIGETMGVPRQDQIPGW FVGMDSPDH  
DRFRRALIPEFTVRRVREMRPAIQGVIDTVIDDLLANGPQADLINDFALP  
IPSLVISALLGVPTVDREFFESRTRTLVAVRASTDQERDTASRELLRYIN  
RLIEIKSKWPADDLPSRLLANGVLHPQELSGVLLLLLLIAGHETTANNIGL  
GIVSLENPQWIGDERVVEELLRLHSVADLVSLRVAVEDVEICGQVIRAG  
EGLVPLVAAANHDES VFACPHMFNPERSARQHVAFGYGVHQCLGQNLVRV  
EMELAYRTL FERIPGLRLTV DDEGLP FKYDGV LHGLHALPVRW

>CYP1005A6 (2519095318) *Salinispora pacifica* CNY330

VSAVLFRSWTKTAGTHWPAVTRVADQQGTEHLVVTEHALVRQVLT DQMTY  
RPDNALDAVTPIPVAAALRVLAGHRFRLPPTLANNGGVSHPAIRARVADAL  
HPAKVAAQRPWLT ELVAERVAAIRATLDSGGSADLHAELSADLPLLVLAR  
LVELPDAPVSAVKQFARA ALELFWAPLDADRQLALADEV GQFHQV LREFA  
DTGGGLAAALRATGHPPDVLVGALFFLLVAGQETTSQFL TLLLHRLAGEP

TVRAALRDGSVSVPNVVEEGLRLEPPIVTWRRVAAVDSTLGGTAVPAGTS  
VLLWLARAGRDP AIVSAPDEF RFGQGSRRHLAFGAGAHRC LGDQLARME  
AAVVVEQVSPLLDGVTVVRAPWYPDNL TFRMPDAFVIRRG PAGAAER

>CYP244A10 (2519095571) *Salinispora pacifica* CNY330

MQDTAQANLAEAEVVRMP IELRPTDCLPELLAAARVAPVVRTPYLDQHAW  
VVC DREL VKQAL THPKLGKDVALAPDWMRQPGQMV TAMPPPEYARMMVMS  
DGEHHARIRRIHAPVLS PQNTERWSERVAALVDGFLDNLDSADGTEVNLI  
TDYTHKIPLAFTAEMLGLPPGAQRRLHDITEVMLYSADYALRQQAVGELF  
EAVQE WVRDPAGLRDGVITGLLASTDGP DATVTKGEAIVWTL SLIINGYE  
TTGSLISAALYEALRRPARERPHTDEAVAAWIEETLRVQPPVPHTTWRF A  
LADLDLGGYLIPRGAPVQISLAAANLDPDE DADSFD AQRGRGHL SFGLG  
AHYCIGAPLARVQTKIALRGFLRRFPQARLSPDTAPRWESEWMIRMSVL  
PALLA

>CYP107AY9 (2519095591) *Salinispora pacifica* CNY330

MSSQDQPTRAELAPIPRSGARVGPEYDQLRKTGDVHQVLLPDTSMAWLVT  
SPDLVSRALADPRLALNRKHSRGGWSGFALPPALDANLLNLDAPDHTRLR  
RLVGPAFSPQRVAALRPRIQRTAEELAETMVATGSPVDLVTGYCTPLSVQ  
VIADLLGVPEAGRTDLRAWTD TMLTSYPPDRDAVRQAVVELHGYVVNLIE  
AKQQRPGDDL SALVATEQEGDRLTRDEL TSLAFLILFAGYENTANLIAS  
TVLRLLDHGSLRGVRVSEAIEETLRLEPPAPAAIRRFPT EEMTIGGATIP  
AGDTVLLSIAAATRGADGNPARLAFGNGPHYCLGAALARVEAEEAITVLA  
RRLPGLALAVPGAPVRWRPTFRTHGPAELLVAV

>CYP105AB28 (2519096309) *Salinispora pacifica* CNY330

MTETASTTTPGISSTTTSGPASGEVTD AEFFPVERGCPFSTPSEYEQIREH  
SPLAKVRLTTGREAWWIAGHELGRAVLADRRFSSDRRDNF PFVSTD PET  
RKQLQDQPI SMIGMDGAEHAQERRALMG EFTVRRMAGLRPRIQQIVDQHI  
DEMLSSDQRTADLVEALS LPVPSLVICELLGV PYADHDF FQARSGPLIRH  
TTPTEVRLRIQKELNTYLGALIDRKVADPTDDLLSRQIAKHHAAGTFDRT  
SLVSM AFLLLIAGHETTANMISLG VVGLLQH PDQLAMIKEDPEKTAPAVE  
ELLRYFTIADTVTARVATEDVQLGGTTINAGDGVVISGLAADHDPKVFTD  
PDRLDL ERGARHHVAFGF GPHQCIGQTLARMELQIVFDTLFRRIPTLRLA  
APLDDIPFKSDAFVYGAERLPVAV

>CYP107E37 (2519096342) *Salinispora pacifica* CNY330

VTIDQEIREYPPFRESRGIGIDPTYELLRRTEPLARVQLPYGEVSWLVTRY  
EDVKT VLTDP RFSRAAAQ GKDQPRTRAEMTYEGII GLDPPDHTRLRLLAG  
KALTARRVN AIRADAQRIANEYVDEMI AKGSPGDLVELFALPY PVTVICE  
LLGV PFEDRAQFRIWTEGLTSTSEQLMVYAEQLFDYMGKLVAQRRAEPTD  
DLLGALVKARDEGDRLTEQELLSIAGVGLLLTG VETVSTHIPNFVYALLT  
HPELMAQLRADRS LVPAAVEELLRMIPLNPAAMFP RYAVEDVTLSGITVR  
AGQPVLVSLPGANRDPEVFENPETFDFTRDQNP HVAFGHGPHHCLGAQLA  
RMELQVALHTVLD RFPDLRLADGDEGVSWKSGLLVRGPSRLLVGV

>CYP245A7 (2516088114) *Salinispora arenicola* CNR921

MPSATLPRFALTGWSRENIVNPYPVYQRYREVASVHRGEPGGDAPDTFYV  
FSYDEVVQVLSSNCFGRGRSLDAAKASVPVPAEQKALRAIVENWL VFMDP  
PRHTELRSLLNRSFSPRIVTEL RPRIARIAQELLSRLGQQVDVDLVESFA  
APLPILVISELLGIPEERRAWLRANALALQEASSSRAGRDVDGYARAEVA

AQEFTEYFREQVRLRRGRAGGDLITILANAQQRGAPVSLDAIVGTCVHLL  
TAGHETTTNSLAKAVLALREHPTVLDELRGAEGLTTDAVEEFLRYDPPVQ  
AVTRWAHQDITLGGCDIPRGSRVVALLGSANRDPARFPSPDVLVRRPAD  
RHLSFGLGIHYCLGATLARAELEIGLQALLDGVPTLGYGTQHVDYADDLV  
FHGPSRLVLVNLGERCK

>CYP244A4 (2516088118) *Salinispora arenicola* CNR921

MSTTTNTELTEAPETNMPVDPGLFDCMPDLIAAARVAPVVRIPIYLGRHAW  
VVCDELVKQALTHPKMGKDIALVPEWMRQPGLMVTAQPDPEYARAMIMS  
DGENHARIRRIHAPVLSRNTERWGERVADKVEGFLDELSQAGSGGSTEV  
NVVTNYTHKIPLAFISEMLGLPPEAEHRLRGITDIMLYSSDYAARREAIG  
GLFGAVEDWVRNPADLRDGVITGLLAASDGPDAAVTEGEVIVWTLGMIIT  
GYETTGSLISTSLYEAIRPPHERPKTDEDITAWIEETLRVHPPFPHTW  
RFPLEDIELGGYLIPKGAPVQVSIAAANRKPGEADSFAERRGHGHLSE  
GLGMHYCIGAPLVRLEAQIAVRGFLRRFPQARLSAETAVQWESEWMIRRM  
SVLPAVLS

>CYP105BL2 (2516088347) *Salinispora arenicola* CNR921

MSSHSAAAPDPETATPLHTLAPELTFPQFERSTPFDPQAYTELSGRCPV  
APVSMADGKPSWLITSFEGVRTTLSDPRFSSDMSHPGFPNRTGKPVDDL  
KDTLGAMDGERHRYRRLTGELTVRRAKAMRPVITQITDEALDQLAAAG  
PGADLVKHVAFVVPVSRVACHLVGIPLSDYELFTGMAATLMDSTSSDDQFA  
ALQNMVSYFDTLVTDREHHRDRLGLHGMVRRYLATGELTRDMLIRLAWTT  
MAAGQETTAHMIGLGVAALLRHPDQLELLRREPHELLPGAVDELMRYLPLI  
QFGIPRVAMDDVEVDGQTVTAGEGVVALPPLANRDPVFERPDELVRRN  
ARQHLLTFGYGPHQCPAHALARLELEVYGRLLERFPTLRLADSDADLKVQ  
DKDIMYRVSELAVTW

>CYP211C1 (2516088779) *Salinispora arenicola* CNR921

VVDVEELLTRLISAQGRQDPFPVYADLHAQGPIAALPPEPERRRVAAVAV  
GYDLVGAVLRDPEWSKAPPPGWTEQEILRTLQTSMMFINPPDHGRMRHVF  
AGTFTPRRLGALEPVVNRVADELDRMADAGAGGLDFVAEFAYPLPARVM  
AEFIGIPETELDWYRERVDVIDAFLDVAGKTPQRLAANAAGAELEAFY  
ELLARRRRTPEGDLISGLVEAVDAGGVELTEDELVSNLIVLFNASFVTTV  
YMLSNGLPVLLAHPEVAAALATDPVLTAGAVDEILRLQAPVHLLARAAPR  
DTVLLGGVPIPOGQNVLLLIAAANRDPAHFPDPDRFDPWRSGPPSLAFGLG  
LHYCLGAAVSRLEGRALPRLLSRFPRLRIMEQPVYSGSLFLRGIDKLSV  
SPGEGSTRE

>CYP125A41 (2516088928) *Salinispora arenicola* CNR921

MTEPRIPAGFDFTDPEVLAHRVPREEFAELRRAPVWWNAQPRGSAGFDD  
DGYWVVTRYADVMTVSRSDTYSTRENTAIARLRPDTTREDIEMQRVIML  
NVDPPPEHTKLRAIVSRGFTPRAINALRGSLAERAHIVRDAAVRGVGDV  
SDVACELPLQAIAGELIGVPQHRRKVFWDWSNQLIGYDDPAYGTDPLTASA  
ELLAYAMEMAERQSPSDDLVTCLVNAQIDGELHTTDEFGFFVMLLAVA  
GNETTRNAITHGMVAFLDNPEQWELFKAERPKSAVEEIIIRWATPVNVFQR  
TALVDTVLLGGQAIASAGQRVALFYGSANFDEAVFEDPERFDITRSPNPHLG  
FGGSGAHFCLGANLARLEIELIFNSIADHLDIRKVAAPQRLRSGWINGI  
RQMPVRYR

>CYP105J3 (2516089101) *Salinispora arenicola* CNR921

MTDSVAFPQGRVCPHQAPAGYRPLAVQRPLAQVTLYDGRRVWAVTTRDLA  
RRLLVDPRISSDRTPAWPAIVPIVAAVNDAAQQKVLKIATALVGTGPE  
HKAQRKMLIPSFTRRMNALRPMIQEIVDQQLDDEMIKSGAPTDLIPAFAS  
AVPVTVLYRLMGIPDDDHGIFEKLSHQLLAGPNANEAYDQLMGYMSRLIA  
ERRRNPGEGLVDDLLAQHGANDDADHDELVSTLVVQVAGNHGTTGSMIAL  
GLFALLQHPEQLAELRADPSLMPTAVDELLRFLSVPDVATRLAADDIEVE  
GTIIRKGDGVFFITSLINRDTDVHDAPNSLGWHHASAADHLTFGFGAHQC  
LGQSLARITMEIALGALIDRLPSRLAVPAEEVPFLPAASLQVIAELPIT  
W

>CYP208A12 (2516089830) *Salinispora arenicola* CNR921

MTLDTITPRVPLGPPRTAALRMLLVMKRDLGMLSSAAARYGDASRLPVG  
HKALWFFNHPRYAKHVLADNSANYHKGIGLVHARRALGDGLLTSEGLDWR  
KQRKVIQPAFQSRRIAQQAGMIAEEAFALVERLRARAGAGPVELTAEITG  
LTLGVLGRSLLDADLAGFDSIGDSFATVQDQAMFELETNAVPMWIPLPR  
QIRFRARRRKLQAVVDTLVDGRAGNLADRVDVLSRLILSARGEADPRVGR  
ERLRDELVTLLLAGHETTASTLGWTLSLIDRHGPGVWERLHAEAVEVLGDR  
LPEYDDLRLRLRYTVMVVEEAMRLFPVWLLPRRALAPDTIGEYRVANAD  
VVISPYTLHRHPEFWPNPERFDPERFAPGQAADRPYAYLPFGAGPRFCV  
GNNLGMMEAVFVIALLCRHLRLTGVPGYRLVPEPMLSLRIRGGLPLVVRP  
VS

>CYP211B2 (2516090187) *Salinispora arenicola* CNR921

MDVSEAI AVLISPSGRLDPYPTYEQLRVHGPVSRRTAGLFVVVTGYAEADM  
VLRDPRFVVLDDDLRDDVFPWHQDSPAIXSIARSMLRTNPPDHSRIRRLA  
AGAFTPRRVAAMREVVTAQADELVDEMIRAGRDGARVDFMDMFAYPLPVA  
VICALLGVPAADRSRFRRWAGDLTGILEPEITPEELAGADAGADELRDYF  
TGLIEQRRRAPADDLTALVQAHDADGDRLSGEELLANLVVLLVAGFETT  
TNLLGNGLVLLTRPEAAAAALRDEPD LAPGYVDELLRYDSPVQLTTRTVR  
ESVSFAGTELPADSWLLVLLGAANRDPRRFPDPARFDPGRAQSQPLSFGA  
GPHYCLGAGLARLEAQVAFPLLLRRLPELALAGRPSRRTRTLRGTETLP  
ITVGAVTADRGTAGVAPGTP

>CYP166A4 (2516090233) *Salinispora arenicola* CNR921

MTDAISFELPWARTDKFDPPAVFDALREQRPLARMRYPDGHVGVIVSSYE  
LVREVLGDPRFSHSCAVGHFPVTHQGQVIPTHPQIPGMFIHMDPPEHTRY  
RRLLTGEFTVRRTSRLTGHEGVATEQIEVMREHGAPADLVATFARPLVL  
RVLSGLVGLPYGERDRYLHAVTLLHDAEADPAEAAAAAYEQAGAYFDEVIK  
RRRRQPEDDLISTLVGDGELTGEELRNIVTLLLFAGYETTESALAVGMFA  
LLHHEDQLARLRADPTKIDAAIEELLRYLTVNQYHTYRTASEDIELHGEV  
INKGDSVTVSLPAANRDPAFACPAELDIDRETSGHVAFGFGI HQCLGQN  
LARVELRAGLSALLRAFPNLRALVPADEVPLRLQGSVFAVKNLPVCW

>CYP1005A1 (2516090468) *Salinispora arenicola* CNR921

VSAVLFRSWTKTAGTRWPDVTRVADQSGTEHLVVTRHALVRQVLTDAQATY  
RPDNAL EAVTPVPVAALRVLAGHRFRLPPTLANNGGVSHPAIRALVADAL  
HPTKVAAQRPWLTGLVADRVATIRTTLDSSGGPVDLYADLTADLPLLVLAR  
LVELPDAPVNAVQKFARAALELFWAPLDADRQLALADEVGRFHQVLRIFA  
DTGGGLAAALRATGHSPDVLVGALFFLLVAGQETTSQFLTLLHRLSGEP  
TIRAALRAGSISAADVVEEGLRLEPPIVTVRRVAAVDSTLGGTTVAAGTS  
VLLWLARAGRDPVVAAPDEFPRPGQRGSRRHLAFGAGAHRCCLGDQLARME  
AAVVVEQATPLLDGVTVVRPPWYPDNLTFRMPDAFVVRR

>CYP105CT1 (2516090974) *Salinispora arenicola* CNR921

MNSPNHMPADRSLTAPTSGCPMALSRGRVGLDVADEISELRDGGRLGRIT  
TAFGQEATLITRYDEVRAQMADSVVFNVAGVPSPPALVDGGFDTESVRRR  
RTVGNLIMLDPPEHTRLRRMVAAWFTTRRVERLRPRVVEIIDAALDEMER  
SGPPVDLVAMFAKTVPITVICELIGVPEELRERYRRRAERAVSASAVSTP  
LDELRRRLREAGWVSRELIEYHRENPSDDIIGMLLREHGTDSDHDDGITDDE  
LVGLANALLIAGHETTTQMLSMGTLALLRHPDQLALLRDDPSIVAGAVEE  
LLRYVGV LHGGFVRVATRDTRLGGHRIHAGELVVPALTAANRDPRLTLDG  
DRLDITRPPTSHVAFGHGVHFCIGAPLARMELREAFPALRRFPGLRLAV  
PDSELEFTQGTTVYSLRGLPVTW

>CYP154M5 (2516090991) *Salinispora arenicola* CNR921

VEQSCPYKLDVTGRDVHAEGEAI RARGPVAQVELPGGVQGWSVTGYQAAR  
QVLADPRFAKDPKKWPAYTSGAIPPNWPLIGWLLMDNMTTNDGADHQRLR  
KLVSHGFTPRQVERTRPLIVKIVNDLLDGLSSAGPDEVVDLKGRFATPLP  
ARVICDMFGVPEALRASVLRGAQVNVTSISGEEAEANVEQWHRELELV  
EAKREKPEDMASLLIAAKEEDGSTLTQEEVVGTLHMLGAGSETLMNAL  
SYAVLGMLSNPGQYEMVRNGTSSWDDVIEETLRAQAPVAQLPLRYATEDV  
AVGGAVIKAGDPVLMGFTAIGRDPVHGETAGDYDITREDKTHLSFGHGV  
HFCLGAPLARLELKIALPALFERFPNMTLAVRPDQLEPQGTFFIMNGHREL  
PVRLGQPATVLA

>CYP107Q4 (2516091132) *Salinispora arenicola* CNR921

MTTTAETS AETIDLFSPEVVADPF GWYARLREETGPTTGTLNIGTMMGGP  
EMWLVTTRYEDVRQVLTDP RFLTNPPADSPLEDIRAGVFKRLDFPPDLIPW  
MANLLNVSDGEDHTRLRKLVS YALTAHRIGKLRPRVEKITADLLDKLAED  
GKDGSPVDLVEEYCYPLPVTVICELVGIDEPRPHWRAGDSMATMNGER  
IPTTLVKCIELARELIAKRRAEPQDDLVTALVQAQAEQDNRVSDDEIIGI  
LFSLVTAGHQTTTYLIGNSVILLLENPDQLARLKENPSMWPQAVRELQRL  
GPIQFAQPRFPSEDIELGGVTIPRGAPVAPLLLAANTDPRRFPDPNKLI  
DRLAVGSEGLHGF GKGIHRCLGQHLAYQEA E VALQGLFTRFPDLSLAVPR  
EEIPWILRPGFTTRTTLPLKLV

>CYP105G5 (2516091133) *Salinispora arenicola* CNR921

LTIETTETPPADDSLRAPLPRQFMQRDDPSKLPALAAAEQSPVGRSTL  
PDGDPFWMVSGYDEARAVLSDPRFSSDRFRYHPRFKKLSGQLGERLRNDK  
ARAGSFINMDPPEHTRYRKLLTGQFTVRRMRQLTVRIEQIVTEQVDVMLA  
EGNSADLVSAFAVPVPSLMICELLGVRYEDRTEFQRRRAAGLLQTDLPKQ  
AVENLEAQRAFMQRLVTDKRRTPADDMISGLVHHAGAEPPLTDDELVGIA  
TLLLFLAGLDTTASMLGLGMFMLLQRPQMAVLRDDPSRIGDAVEELLRYL  
TVVSTGLFRFAKEDVVLGDEHIPAGSTVVVSLMAANRDGRHWPEPETLDV  
TRVRSSHLAFGHGVHQCLGQQ LARIELTVGITELLRRLPNVRLAVPPADV  
PLRNDMITYGVHRLPILWDTF

>CYP1051A1 (2516091154) *Salinispora arenicola* CNR921

MATDAAITRARTVPAWKALPAAVRDTHRAFVDVGNWSDGDVVRVSLGVSR  
PYLVTNPAHVQEVLHERAAIYPRGDDTALWRSVRKLVGDGILAEGDAWAA  
SRRVLAPMFRPARINAMVDTMADA IAGAIDDLHGAATAGTPIDVGRELSR  
IVCSAIMRVFFADRITVRDALRIMKAQETIVTAMAPRILAPLVPWWIMP

GDRRFRAAVRSIDDILLPVLRQAQRQPDDGDDLLSRLVHARADDGRALSE  
KMRDDLVSMVAVTTETSTVVLTLWLPLLANHPDVANRLYDEIDRVVGGG  
PVRGDHLAELTYTRMVLDELLRLYPAGWILPRRAATTDVLGGVRINKGAT  
VILSPYVTQRMATAWWGPTAEAFDPERFAAGREAADGRHRYAYYPFGVGMH  
RCLGEHLFNLEAILIVATLLSRFRFALTDTSMPGVKVAASTRPARTVEVI  
LKPVAPVPAR

>CYP248A2 (2516091293) *Salinispora arenicola* CNR921

VLADAVTAFDPTAVDVRRDPYPSYHWLLRHDPVHRGAHQVWYVSRFADVR  
AVLGDERFARTGIRRFWTDLVGPGLLSQIVGDIILFQDEPDHGRLRGVVG  
PAFSPSALRRLEPTIEATVNDLLRPARALGAMDVVADLAYPLALRAVLEL  
LGLPAGDANAVGRWSRAVGRTLDRGATAEDMRRGHAAIAEFADYVERVLA  
ERREDGADLLALMLAAHRSQLMRNEIVSTVVTFFITGHETVASQLGNGL  
LSLLDHPEQMELMRQPHELLPHAVEECLRFDPVQSNTROLAADVELHGR  
RLRRDDVVVVLAGAANRDPGRYDRPDELDIRRDPVPSMSFGAGMRYCLGS  
YLARLQLRTALGAMVALPDLRLVCSPNELAYQPRTMFRGLTRLPVAFTPA  
G

>CYP105W2 (2516091301) *Salinispora arenicola* CNR921

MTGYQDRPTGDQPGAPVPSGSTDPGIGAFPLPRRCFSPPAEYARLRAEH  
PVVRLPMLGGDTAWVVSRRHADVRQVLSDFRMSADRRRPFGPKFAPTTEGQ  
RQASFANFRPPLNWLDPPEHAICRRQIVDEFVRRVRQSRALVERVVDTH  
LDALTAAPGADLVSTFAYPVPSQVICEVLGVYPYGEHEFFERRSTLMFRR  
STPADERARCAREIRDFLDMVVTDKHRPGDDVLSRLLYRQRRAGGVDHE  
AVVSMAFVLLLVAGHVTTSNMLALSVLALLTHPARLARLRAEPERFPAAVE  
ELLRYFTVVEAATARTATAEVTIGGVTIAAGEGVVALGQAANRDPRVFEH  
PDEFDPDRDARAHAFGYGRHICPGQHLARLEMEVALSRLFRRLPGLRLT  
MEVSDLPLKEDSNIFGLYALPVAW

>CYP105CP2 (2516091725) *Salinispora arenicola* CNR921

MTKSMPVQDLPAFPIPRECPYRPSAQHVSLRSGGPMAKVRLYNGRTAWLV  
TDSAHAVALSDYRRVSIKPYHGNYPILLNEEFKVVDSGYADVLFGVDPP  
EHTRQRQMIMPSFTLRRTAVLRPDIQRIVDDKLDEMRRHGAPGDLVTEFA  
QPVPMSMVSFLLGVFWEDHEEFETPAHKLFVPELAEETELGAYLERLI  
QKKEQPGGTPGGTGLLDDLIRDHLRAGALSDELVHIAMAMLVAGTDTT  
NVISLGLTALLDNPDQWAALRDNPDDELIPGAVEEILRYTSLIEAFARVAV  
SDIELNGAVIKEGEGILISSAGVNFDPALAPDPGRFDIRRPPRPSFSFSH  
GIHRCPGDNLARLELEIAFRSLVTRMPNLRATAKPIDQIPSNNDGTLQRL  
YELPVVW

>CYP105CN1 (2516091727) *Salinispora arenicola* CNR921

MAAPAPQATQSTTPHPPSYPLPRECPYRPSAGTARLRDAGPVSTVRLYDG  
RTAWLVGTAAEARALLADSRVSNRADFPNYPVMDERHLSMRATREMAREE  
EGGFAAALFGMDPPEHTRQRQLLLPRFTVRQVAARRPAIQRIVDEHLDAM  
EANGSPADLVSAFATPVPTMVVCTHLGVYPYQDRTRFEPVAGLFEPDRAD  
AAMAEALTAYLHQLIETKQSEPGDGVIDHLIANHLRPGAIDRAELVAIASA  
ILVAGTVTTSSAIALGTLALLTAPGQYAALVDNPDLPVGAUNEILRYLSL  
VEQLARVATEDIEIGGKLIRAGDGIIVSFAAGNLDPNVTTHPDRLDVALP  
PTNHLAFSHGIIHCIGQNLALLELDIAFRALVSRFPTLRLAVPAEQLPY  
FAGDVPRLACLPTW

>CYP107FS2 (2516091728) *Salinispora arenicola* CNR921

MPVPQGEQNLTTTEVFADPKALFATLGSRQPLHRISLPDGMFAVLVTGNRE  
ARQALSDPRLVRSITAAAPELHKYHPLASDDYALSRHMLFADPPDHGRMR  
KLVSTAFTRRRVEQMRPRIQQITDDLIDVIAAKGEADLVETLALPLPIAV  
ISEMLGVPFADRSEFERHAEVLTGINASSGFDIAAAGRWFDEYLAELVQ  
QRRREPQDDLISGMLAAQDKGDRLTDVELRSNALLLSAGFETTVNLVAN  
GLLALLRHPEAMAALRSEPNLMTTAVDELRLRYDSPVSCVTYHFAQEPVEI  
GGFEIRSGEHVVIAAAAAANHDPTVFADPSRLDLRREGSGQILSFSGIHF  
CLGAPLARLEGEIAFGTVLRRLAGLRLAVPTDSLWVKASFVLHRLERLPV  
TFTPDRAPNPIDSVHTV

>CYP107AY2 (2516091879) *Salinispora arenicola* CNR921

MTAEPTPIPRSGARLGQEYDQLRKTDGVHQVLLPDTSLAWLVTNPEVAAR  
ALADPRLALNRRNSRGGWSGFALPPALDANLLNLDAPDHTRLRLRVGPAF  
SPQ RVAALRPGIRRAAEHLDDTLVATSGPTDLVTGYCNPLSVQVIADLMG  
VPEAGRNTLRAWTDMLTSYPPDRDAIRRAVTELHGYYVDLIDIKQQQPG  
DDL SALVTIEQDGDRLSRDELTSLAFLILFAGYENTANLIASAVLWLLD  
HGGLNVVPSSEAIEGTLRHEPPAPVAIRRFPTEDIIIGGV TIPAGDTVLL  
SVAAATRGADGNAARLAFGNGPHYCLGAALARVEAEALTVLARRLPGLT  
LAVPPSQVRWRPTFRTHGPAELLVGW

>CYP105AB8 (2516092014) *Salinispora arenicola* CNR921

MTETASSRLTDTEFPVQRECPFAEPVEYEQIRERSSIAMVRLTGGGEAWW  
ISGHEQGRAVLADRRFSSDRKANFPFVSTDPAVRKRLHAQPLSLISMDG  
AEHTQARRALIGEFTVRRLAALRPRIQQIVDQCIDEMLTTDQHRADLVKT  
LSLPVPSLVICELLGVYPYADHDFQEHATLVRRNTASEVRQHSIDELNA  
YLGALIDRKLASPDLLGRQIARQHRDGTDFDRSSMVSLAFLLLVAGHET  
TANMISLGVVGLLQHPEQLAMIKDDPKTPLAIEELLRFFTIVDSVTSRV  
ATEDVRFGDTTINAGDGVVVSGLSADWDPTVFADPDRLDLERGARHHLAF  
GFGPHQCLGQNLARLELQIVFDTLFHRIPTLRLAAPLDKIPFKTDAAIYG  
ARELPVAW

>CYP208A12 (2515698251) *Salinispora arenicola* CNH964

MTLDTITPRVPLGPPRTAALRMLLVMKRDRLGMLTSAAAARYGDASRLPVG  
HKALWFFNHPRYAKHVLADNSANYHKGIGLVHARRALGDGLLTSEGDLWR  
KQRKVIQPAFQSRRIAQQAGMIAEEAFALVERLRARAGAGPVELTAELTG  
LTLGVLGRSLLDADLAGFDSIGDSFATVQDQAMFELETNAVPMWIPLPR  
QIRFRARRRKLQAVVDTLVDGRAGNLADRVDVLSRLILSARGEADPRVGR  
ERLRDELVTLLLAGHETTASTLGWTLSLIDRHGPGVWERLHAEAVEVLGDR  
LPEYDDLRLRLRYTVMVVEEAMRLFPVWLLPRRALAPDTIGEYRVPANAD  
VVISPYTLHRHPEFWPNPERFDPERFAPGQAADRPRYAYLPFGAGPRFCV  
GNNLGMMEAVFVIALLCRHLRLTGVPGHRLVPEPMLSLRIRGGGLPLVVRP  
VS

>CYP105AB8 (2515698783) *Salinispora arenicola* CNH964

MTETASSRHTDTEFPVQRECPFAEPVEYEQIREQSSIAMVRLTGGGEAWW  
ISGHEQGRAVLADRRFSSDRKANFPFVSTDPAIRKRLHAQPLSLISMDG  
AEHTQARRALIGEFTVRRLAALRPRIQQIVDQCIDEMLTTDQHRADLVKT  
LSLPVPSLVICELLGVYPYADHDFQEHATLVRRNTASEVRQHSIDELNA  
YLGALIDRKLASPDLLGRQIARQHRDGTDFDRSSMVSLAFLLLVAGHET  
TANMISLGVVGLLQHPEQLAMIKDDPKTPLAIEELLRFFTIVDSVTSRV  
ATEDVRFGDTTINAGDGVVVSGLSADWDPTVFADPDRLDLERGARHHLAF  
GFGPHQCLGQNLARLELQIVFDTLFHRIPTLRLAAPLDKIPFKTDAAIYG

ARELPVAW

>CYP105BL2 (2515699196) *Salinispora arenicola* CNH964

MSSHSAAAPDPETATPLHTLAPELAFFQFERSAPFDPPQAYTELSGRCPV  
APVSMADGKPSWLITSFEGVRTTLSDPHFSSDMSHPGFNRTGKPVDDLL  
KDTLGAMDGERHRYRRLTGELTVRRAKAMRPVITQITDEALDQLAAAG  
PGADLVKHVAFVVPVSRVACHLVGIPLSDYELFTGMAATLMDSTSSDDQFA  
ALQNMVSYFDTLVTDRHHDRDDLGHMVRRYLATGELTRDMLIRLAWTT  
MAAGQETTAHMIGLGVAALLRHPDQLELLRREPHELLPGAVDELMRYLPLI  
QFGIPRVAMDDVEVDGQTVTAGEGVVALPPLANRDPVAFERPDDELVRRN  
ARQHLLTFGYGPHQC PAHALARLELEVYGRLLERFPTLRLADSDADLKVQ  
DKDIMYRVSELAVTW

>CYP211B2 (2515699438) *Salinispora arenicola* CNH964

MDVSEAI AVLISPSGRLDPYPTYEQ LRAHG PVSQTTAGLFVVTGYAEADM  
VLRDPRFVVLDDDLRDDVFPHWQDSPAIKSIARSMLRTNPPDHSRIRRLA  
AGAFTPRRVAAMREVVTQADELVDemiQAGRDGARVDFMDMFAYPLPVA  
VICALLGVPAADRSRFRRWAGDLTGILEPEITPEELAGADAGADELRDYF  
TGLIEQRRRAPADDLTALVQAHDADGDRLSGEELLANLVVLLVAGFETT  
TNLLGNGLVVLTRPEAAAAALRDEPD LAPGYVDELLRYDSPVQLTTRTVR  
ESVSFAGTELPAGSWLLVLLGAANRDPRRFPDPARFDPGRAQSQPLSFGA  
GPHYCLGAGLARLEAQVAFPLLLRRLPELALAGRPSRRTRLTLRGYETLP  
ITVGAVTADRGTPAGVAPGTP

>CYP125A41 (2515699566) *Salinispora arenicola* CNH964

MTEPRIPAGFDFTDPEVLAHRVPREEFAELRRTAPVWWNAQPRGSAGFDD  
DGYWVVTRYADVMTVSRSDTYSTRENTAIARLRPDTTREDIEMQRVIML  
NVDPPPEHTKLRAIVSRGFTPRAINALRGSLAERAHIVRDAAVRGVGDV  
TDVACELPLQAI AELIGVPQHRRKVFWDWSNQLIGYDDPAYGTDPLTASA  
ELLAYAMEMAEERQSPSDDLVTKL VNAQIDGEHLTTDEF GFFVMLLAVA  
GNETTRNAITHGMVAFLDNPEQWELFKAERP KSAVEEII RWATPVNVFQR  
TALVDTVLGGQAI SAGQRVALFYGSANFDEAVFEDPERFDITRSPNPHLG  
FGGSGAHFCLGANLARLEIELIFNSIADHLPDIRKVAAPQRLRSGWINGI  
RQMPVRYR

>CYP105J3 (2515699716) *Salinispora arenicola* CNH964

MTDSVAFPPQGRVCPHQ PAPGYRPLAVQRPLAQVTLYDGRRVWAVTTRDLA  
RRLLVDPRISSDRTPAWPAIVPIVAAAVNDAQQKVLKIATALVGTGPE  
HKAQRKMLIPSF TFRMNALRPMIQEIVDQQLDEMIKSGAPTDLIPAFAS  
AVPVTVL YRLMGIPDDDHGIF EKL SHQLLAGPNANEAYDQLMGYMSRLIA  
ERRRNPGEGVLDDLLAQHGANDDADHDELVSTLVVQVAGNHGTTGSMIAL  
GLFALLQHPEQLAELRADPSLMPTAVDELLRFLSV PDAVTRLAADDIEVE  
GTIIRKGDGVFFITSLINRDTDVHDAPNSLGWHHSAADHLTFGFGAHQC  
LGQSLARITMEIALGALIERLPSLRLAVPAEEVPFLPAASLQVIAELPIT  
W

>CYP244A4 (2515699873) *Salinispora arenicola* CNH964

MSTTTNTELTEAPETNMPVD PGLFDCMPDLIAAARVAPVVRIPYLGRHAW  
VVCDELVKQAL THPKMGKDIALVPEWMRQPGLMVTAQPDPEYARAMIMS  
DGENHARIRRIHAPVLS PRNTERWGERVADKVEGF LDELSQAGSGGSTEV  
NVVTNYTHKIPLAFISEMLGLPPEAEHRLRGITDIMLYSSDYAARREAIG



GLFGAVEDWVRNPADLRDGVITGLLAASDGPDAAVTEGEVIVWTLGMIIT  
GYETTGSLLISTSLYEAIRRPPHERPKTDEDITAWIEETLRVHPPFPHTW  
RFPLEDIELGGYLIPKGAPVQVSI AAANRKPGE GADSFDAERRGHGHL SF  
GLGMHYCIGAPLVRLEAQIAVRGFLRRFPQARLSAETAVQWESEWMIRRM  
SVLPAVLS

>CYP245A7 (2515699877) *Salinispora arenicola* CNH964

MPSATLPRFALTGWSRENIVNPYPVYQRYREVASVHRGEPGGDAPDTFYV  
FSYDEVVQVLSSNCFGRGRSLDAAKASVPVPAEQKALRAIVENWLVMFMDP  
PRHTELRSLLNRSFSPRIVTEL RPRIARIAQELL SRLSQQVDV DLVESFA  
APLPILVISELLGIPEERRAWLRANALALQEASSRAGR DVDGYARAEVA  
AQEFTEYFREQVRLRRGRAGGDLITILANAQQRGAPVSLDAIVGTCVHLL  
TAGHETTTNSLAKAVLALREHPAVLDELRGAEGLTTDAVEEFLRYDPPVQ  
AVTRWAHQDATLGGCDIPRGSRVVALLGSANRDPARFPSPDVLDVRRPAD  
RHLSFGLGIHYCLGATLARVELEIGLQALLDGVPTLGYGTQHVDYADDLV  
FHGPSRLVLVNLGERCK

>CYP105CP2 (2515700040) *Salinispora arenicola* CNH964

MTKSMPVQDLPAFPIPRECYPYRPSAQHVSLRSGGPMKVRLYNGRTAWLV  
TDSA HARAVLS DYRRVSIKPYHGNYP LLNEEF EKVVDSGYADVLFGVDPP  
EHTRQRQMIMPSFTLRRTAVLRPDIQRIVDDKLDEMMRHGAPGDLVTEFA  
QPVP SMVISFLLGVPWEDHEEFETPAHKLFVPELAEEATELGAYLERLI  
QKKEQPGGTGGTGLLDD LIRDHLRAGALS RDELVHIAMAMLVAGTDTT  
NVISLGLTALLDNPDQWAALRDNPD ELIPGAVEEILRYTSLIEAFARVAV  
SDIELNGAVIKEGEGILISSAGVNFDPALAPDPGRFDIRRP RPSPFSFSH  
GIHRCPGDNLARLELEIAFRSLVTRMPNLRTAKPIDQIPSNNDGTLQRL  
YELPVVW

>CYP105CN1 (2515700042) *Salinispora arenicola* CNH964

MAAPAPQATTSTTPHPPSYPLPRECYPYRPSAGTAHLRDAGPVSTVRLYDG  
RTAWLV TGAAEARALLADSRVSNRADFPNYPVM DERHLSMRATREMAREE  
EGGF AAALFGMDPPEHTRQRQLLLPRFTVRQVAARRPAIQRMVDEHLDAM  
EANGSPADLVSAFATPVPTMVVCTHLGV PYPQDRTRFEPAVAGLFE PD RAD  
AAMAELTAYLHQ LIETKQSEPGDGV IDHLIANHLRPGAIDRAELVAIASA  
ILVAGTVTTSSAIALGTLALLTAPGQYTALVDNPD LVP GAVNEILRYLSL  
VEQLARVATEDIEIGGKLIRAGDGIIVSFAAGNLDPNVTTHPDRLDVALP  
PTNH LAFSHGIHHCIGQN LALLELDIAFRALVSRFP TLR LAVPAEQ LPT Y  
FAGDVPR LACL PVTW

>CYP107FS2 (2515700043) *Salinispora arenicola* CNH964

MPVPQGEQNLTTTEVFADPKALIATLGSRQPLHRISLPDGM PAVLVTGNRE  
ARQALSDPRLVRSITAAAPELHKYHPLASDDYALSRHMLFADPPDHGRMR  
KLVSTAFTRRRVEQMRP RIIQITDDLIDVIAAKGEADLVETLALPLPIAV  
ISEMLGVFPADRSEFERHAEVLTGINASSGFD AIIAAGRWFDEYLAGLVQ  
QRRREPQDDLISGMLAAQDKGDR LTDVELRSNALLLSAGFETT VNLIAN  
GLLALLRHPEAMAALRSEPNLMTTAVDELLRYDSPVSCVTYHFAQEPVEI  
GGFEIRSGEHVVIAAAAANHDPTVFADPSRLDLRREGSGQILSF SHGIHF  
CLGAPLARLEGEIAFGTVLRRLAGRLAVPTDSL VWKASFVLHRLERLPV  
TFTPDRDPNPIDSVHTV

>CYP125G6 (2515700084) *Salinispora arenicola* CNH964

VPTLLNEHVSYDGAIAIVDSGATSWIRLAERVNVRWVHLLRAHGLDTGD  
RLACVTGNRRTEFEVLLAALHTGVTVPVNVHLLTVTEIGHILSDSGSRVV  
ITEELHVKAFAAAADGMAGPVAGLVLDREIEGFAAVEPLAAASPAEPE  
GQVCGATMLYTSGETTGRPKGVVNNLFVTGAPYARVGRLCDYARSVLGVP  
RERMLLDGPWYHSSQLFFALLSLLQGSRLVIRPYFDPAATLKTIDDHRIT  
VTHLVPTQLVRLLRVDALTRQMFSGASLRRVWHGGGPPPEVKRSMIDWW  
GPVLVEYYGATEGGVVTLIDSAEWLARPGSVGRAVPPSEVVVVDDGGQPV  
AAGQTGQVFFRRRTGNRFHYHNAPEKTQAAYLAPDTFTTYGEVGHVDEEDGY  
LFLTGRAQDMIVSGGVNVYPAEVEAALLRHPVVRDAAVIGVADDEFGERV  
VGIVVPETAVDPDDLATHLDAHCRVSLAGFKVPRTYRVVESLPRDETGKL  
RKDALRSKFGWLSGAAMTVPRPATGQPTAHRPDIAHPTTYVSGVPHDEFA  
RRRDEPVGWVAEPVLTTRHTAAGRTATRGSGFWAVTRYEDVVAASRRVTD  
FSSAAKGAFLLTDPRTPADLQQARQLLVNMDDPHHARLRKLVTSVFTPRAV  
RGLLASIDAHAAALVAKVVAAGEFDVVTDLAAELPLLVLADLLGVPKQDR  
ALLYGWSNHLVGFDPDFGGDIDAYRTAMAEAFQYALNLGVERRARPTD  
DLVSLLANAEVDGTRLTDREFCNFWLLLTVAGNETTRHLVAGTMQALTEH  
PGEARLVEGRVPTESAVEELLRWVTPIMQFRRTATRDTEIGGQAVTAGE  
KVVLYYTSANRDATVFAEPDRDLGRTPNRQLSFGIGPHYCLGAHLARAE  
LTALLRVMSPHLGLSLQLTGVPVSRLASNFVNGVKAMPAVIGSR

>CYP154M15 (2515700109) *Salinispora arenicola* CNH964

MNDKCPFAALDVTGQDLHGEEARLREQGPAVLVELPGGVKAWSINRYEVI  
RELLMDRRVTKNARKHWPFAIKGEIPPDWEMISWVAMDNMVTAYGKDHVR  
LRKLVGRAFTQRRADALRPQVVALSTKLLDDLGGATPPGEVVDLRERFAYP  
LPAMLVASLIGMSEAALAACSKVIDMMVHTNVSPEEAQAVLRGWRAAMAD  
LIESKRRTPGEDITTDLIAAREEDGSRLSEAELADTIFAILGAGSETTIN  
FFDNAITALLSRPQQLQLLRTGAVTWDDVIDEVLRVESPLAHLPLRYAVE  
DIELDGVTIPQGDPIILVNYAAAGRDPALHGGTADEFDLARGDKTHLSFGY  
GPHYCLGAGIARMVATIGLSMLFERFPDLSLAVPATELKRLPTFIMNGHQ  
TLPVRLTAHAR

>CYP107Q4 (2515700322) *Salinispora arenicola* CNH964

MTTTAETSATIDLFSPEVVADPFGWYARLREETGPTTGTLNIGTMMGGP  
EMWLVTTRYEDVRQVLTDPRLFNTNPPADSPLEDIRAGVFKRLDFPPDLIPW  
MANLLNVSDGEDHTRLRKLVSYALTAHRIGKLRPRVEKITADLLDKLAED  
GKDGSPVDLVEEYCYPLPVTVICELVGIDEPDRPHWRAWGDSMATMNGER  
IPTTLVKCIELARELIAKRAEPQDDLVTALVQAQAEQDNRVSDDEIIGI  
LFSLVTAGHQTTTYLIGNSVILLLENPDQLARLKENPSMWPQAVRELQRL  
GPIQFAQPRFPSEDIELGGVTIPRGAPVAPLLLAANTDPRRFPDPNKLI  
DRLAVGSEHGLGFGKGIHRCLGQHLAYQEAQAEVALQGLFTRFPDLAVPR  
EIPWILRPGFTRTRTLPLKLV

>CYP105G5 (2515700323) *Salinispora arenicola* CNH964

LTIETTETPPADDSLAPLPRQFMQRDDPSKLPPALAALAEQSPVGRSTL  
PDGDPFWMVSGYDEARAVLSDPRFSSDRFRYHPRFKKLSGQLGERLRNDK  
ARAGSFINDPPEHTRYRKLLTGQFTVRRMRQLTVRIEQIVTEQVDVMLA  
EGNSADLVSAFAVPVPSLMICELLGVRYEDRTEFQRRAGLLQTDLPKQ  
AVENLEAQRAFMRQLVTDKRRTPADDMISGLVHHAGAEPPLTDDDELVGIA  
TLLLFLAGLDTTASMLGLGMFMLLQRPQMAVLRDDPSRIGDAVEELLRYL  
TVVSTGLFRFAKEDVVLGDEHIPAGSTVVVSLMAANRDGRHWPEPETLDV  
TRVRSSHAFGHGVHQCLGQQARIELTVGITELLRRLPNVRLAVPPADV  
PLRNDMITYGVHRLPILWDTF

> CYP1051A1 (2515700343) *Salinispora arenicola* CNH964

MATDAAITRARTVPAWKALPAAVRDTHRALVDVGNWSDGDVVRVSLGVSR  
PYLVTNPAHVQEVLHERAAIYPRGDDTALWRSVRKLVGDGILAEGDAAWAA  
SRRVLAPMFRPARINAMVDTMADAIAGAVDDLHGAATAGTPIDVGRELSR  
IVCSAIMRVFFADRITVRDALRIMKAQETIVTAMAPRILAPLVPWWIPMP  
GDRRFRAAVRSIDDILLPVLQRQAQRQPDDGDDLLSRLVRARADDGQALSE  
KRMRDDLVSMVAVTTETSTVVLTWLVPLLANHPDVANRLYDEIDRVVGGG  
PVRGDHLAELTYTRMVLDDELLRLYPAGWILPRRAATTDVLGGVRINKGAT  
VILSPYVTQRMATAWWGPTAEAFDPERFAAGREAADGRHRYAYYPFGVGMH  
RCLGEHLFNLEAILIVATLLSRFRFALTDTSMPGVKVAASTRPARTVEMI  
LKPVAPVPPAR

>CYP211C1 (2515701173) *Salinispora arenicola* CNH964

VVDVEELLTRLYSAQGRQDPFPVYADLHAQGPIAALPPEPERRRVAAVAV  
GYDLVGAVLRDPEWSKAPPPGWTEQEILRTLQTSMMFINPPDHGRMRHVF  
AGTFTPRRLGALEPVVNRVADELDRMADAGAGGLDFVAEFAYPLPARVM  
AEFIGIPETELDWYRERVDVIDAFLDVAGKTPQRLAAANAAGAELEAFYF  
ELLARRRRTPGEDLISGLVEAVDAGGVELTEDELVSNLIVLFNASFVTTV  
YMLSNGLPVLLAHPEVAAALATDPVLTAGAVDEILRLQAPVHLLARAAPR  
DTVLGGVPIPPQGQNVLLLIAAAANRDPAHFPDPRFDPWRSGPPSLAFGLG  
LHYCLGAAVSRLEGRALPRLLSRFPRLRIMEQPVYSGSLFLRGIDKLSV  
SPGEGSTRE

>CYP107FJ2 (2515701419) *Salinispora arenicola* CNH964

MSETLSTSVLLADAAEQRAWRAKLRGAGPVHRITTSGETGWLIVGHEEA  
RNALVDLRLQGRATATVGHGRMPEDLERALNSHMLNVGPPDHTRLRLVS  
AAFTRRRIEQMRPRIQELTDELLDGLAGADEADLVAGLALPLPMRVLDL  
FGIPAEDCADFNVTKVLTSAGAVDLRLTTAAGEMVAYLRGLLDRKRQV  
PESDLSALVAVRDGADRLSDDELTSMVYLLLTAGYETTVNLIGNGLLNL  
LANPEQLVAFKADPDLQPQVVEEAMRFDSPVQIAVRHSTEPVEIAGQAIP  
SGALILVSLWANRDPDRFTEPEAFRVDRQDNPQLGFGYGFHHHCIGAPLA  
RMEGTIAIGTVIRRFAPALRLAHPAGSLTWRASMVMHGLTALPVHLR

>CYP154M20 (2515701426) *Salinispora arenicola* CNH964

MERCPYVLDRAGRDLHGEAKALRARGPVTLVELHGGYTAVSVTSYEIAKQ  
LLVDPRISKNTKETWPEFREGKVPQDWELYTWVAMDNMQTRDGEEDRLR  
KLVAQAFTTRQVAKVRPMIEDIVDRLDDLEKVPAGEVVDIKGRYFYPLS  
TILVCDLLGIPEADRAEALHGTVVNARTTNSAESEANLHQWQSALSKLV  
ETKRREPGNDITTLIIKAREDEQAPLTDDEVIGSLHLLIGGGTETTSNVL  
CNTLIDLTHPDQMAMIRSGAVGWEEAWEVEVRKDGAVGSMPPFRCANADI  
EIGGVTIAGKDLVLINYAAAGRDPERYGDTTAEFDITRADKTNLSFGYGR  
HRCGLPALATMEAMISLPALFERFPDLVLAVPREELKPQGTFFVFNHYAEV  
PMLLRS

>CYP248A2 (2515701448) *Salinispora arenicola* CNH964

VLADAVTAFDPTAVDVRRDPYPSYHWLLRHDPVHRGAHQVWYVSRAFADVR  
AVLGDKRFARTGIRRFWTDLVGPGLLSQIVGDIILFQDEPDHGRLRGVVG  
PAFSPSALRRLEPTIEATVNDLLRPARALGAMDVVADLAYPLALRAVLEL  
LGLPAGDANAIGRWSRAVGRTLDRGATAEDMRRGHAAIAEFTDYVERALA  
ERREDGADLLALMLAAHRSQIMSRNEIVSTVVTFTFTGHETVASQLGNGL  
LSLLDHPEQLELVRRQPHLVPAVEECLRFDPVQSNTRQLAADVELHGR  
RLRRDDVVVVLAGAANRDPGRYDRPDELDIRRDPVPSMSFGAGMRYCLGS  
YLARLQLRTALGAMVALPDLRLVCNPNELAYQPRTMFRGLTRLPVAFTPA  
G

>CYP105W2 (2515701455) *Salinispora arenicola* CNH964

MTGYQDRPTGDQPGAPVPSGSTDPGIGAFPLPRRCPPFSPPAEYARLRAEH  
PVVRLPMLGGDTAWVVSRRHADVRQVLSDFRMSADRRRPGFPKFAPTTEGQ  
RQASFANFRPPLNWLDPPEHAICRRQIVDEFVSRRVRQSRALVERVVDTH  
LDALTAAPGADLVSTFAYPVSSQVICEVLGVPYGEHEFFERRSTLMFRR  
STPADERARCAREIRDFLDVVVTDKEHRPGDDLLSRLLYRQRAGGVDHE  
AVVSMAFVLLVAGHVTTSNMLALSVLALLTHPARLARLRAEPPERFPAAVE  
ELLRYFTVVEAATARTATAEVTIGGVTIAAGEGVVALGQAANRDP RVFEH  
PDEFDPDRDARAHLAFGHGRHICPGQHLARLEMEVALSRLFRRLPGLRLT  
MEVSDLPLKEDSNIFGLYALPVAW

>CYP154M13 (2515701468) *Salinispora arenicola* CNH964

MSTGRPVVLDPTGRDIHGEADHLRALGPATLVELPGGILAWSINSYEVGK  
ALLSAPNVSKSARRHWPAFYNGEIPPDWEMISWVAMDNISTTFGGDHRRL  
RRLTAKAFGSRRAEQVRPMATHMVNTLLDRMADAADAGEVVDLKAAFAYP  
LPGMLVAELIGMSEEARVAAAKVIDMMTATNITPEQAQGVLLGWRDAITD  
LIAALKRAQPGDDITSDLIAARDEDGSLLTEQELVDITIFAILGAGSETTIN  
FFDNAITQLLTHPEQLELVKSGQVSWDDVIEEVLRLSPLASLPMRFAVE  
DIQLDGVTIHKGDPIILINYAALGRDPALHGESAGVFDVTRQHKEHLSFGH  
GAHYCLGAGIARMVAKTGLSALFERFPRMTLAVSAKDLVPYPTFIMNGNR  
QLPVHLSGALTWREGEQSALGRA

>CYP154M21 (2515701469) *Salinispora arenicola* CNH964

MEKCPYVLDRAAGSDIHKEASNLARGPVTLVELHGGYTAVSVTSYEVAKQ  
LLMDPRISKNTKAHWPEFRDGNVPQDWELYTWVAMDNMQTRDGKEHDLRL  
KLVAFAFTGRQAVKSRPIIEEIVNRLDDLETAAPRGQAVDIKARYFYPLS  
TILVCDLLGIAEEDRDVILHGNVNSKTTNTAESEANLHQWQTALGRLV  
ETKRDPGDDLTTVIIKAGEDEQTPLTDDEVIGSLHLLIGGGTETTANVL  
CHTVVDMLTHPDQLAMVRSGAVSWESAWEEEVKDGAVGSMFPFCATDDV  
EIGGVTIKAGDLVLINYAAAGRDPERYGDAAAEFDITRADKANLSFGYGR  
HRCLGPALATMEAMVALPALFDRFPNLALAVPPNELKPKQGTIFNGYAEV  
PLLLRS

>CYP166A4 (2515701500) *Salinispora arenicola* CNH964

MTDAISFELPWARTDKFDPPTVFDALREQRPLARMRYPDGHVGWIVSSYE  
LVREVLGDPRFSHSCAVGHFPVTHQGQVIPTHPQIPGMFIHMDPPEHTRY  
RRLLTGEFTVRRTSRLTGHEGVATEQIEVMREHGAPADLVATFARPLVL  
RVLSGLVGLPYGERDRYLHAVTLLHDAEADPAEAAAAAYEQAGAYFDEVIE  
RRRRQPEDDLISTLVGDGELTGEELRNIVTLLLFAGYETTESALAVGMFA  
LLYHEDQLARLRADPTKIDAAIEELLRYLTVNQYHTYRTASEDIELHGEV  
INKGDSVTVSLPAANRDPARFACPAELDIERETS GHVAFGFGIHQCLGQN  
LARVELRAGLSALLRAFPNLRLAVPADEVPLRLQGSVFAVKNLPVCW

>CYP1005A1 (2515701659) *Salinispora arenicola* CNH964

VSAVLFRSWTKTAGTRWPDVTRVADQSGTEHLVVTRHALVRQVLTDAQTY  
RPDNALAEAVTPVPVAALRVLAGHRFRLPPTLANNGGVSHPAIRALVADAL  
HPTKVAAQRPWLTGLVADRVATIRTTLDSSGGPVDLYADLTADLPLLVLAR  
LVELPDAPVNAVKKQFARAALFWAPLDADRQLALADEVGRFHQVLRIFA  
DTGGGLAAALRATGHSPDVLVGALFFLLVAGQETTSQFLTLLHRLSGEP

TIRAALRAGSISVADVVEEGLRLEPPIVTWRRVAVDSTLGGTTVAAGTS  
VLLWLARAGRDPVVAAPDEFRRPGQGRSRRHLAFGAGAHRCCLGDQLARME  
AAVVVEQATPLLDGVTVVRPPWYPDNLTFRMPDAFVVR

>CYP107AY2 (2515702293) *Salinispora arenicola* CNH964

MTAEPTPIPRSGARLGQEYDQLRKTGDVHQVLLPDTSLAWLVTNPEVAAR  
ALADPRLALNRRNSRGGWSGFALPPALDANLLNLDAPDHTRLRRLVGPAPF  
SPQRVAALRPGIRRAAEHLDDTLVATSGPTDLVTGYCNPLSVQVIADLMG  
VPEAGRTNLRAWDTMLTSYPPDRDAIRQAVTELHGYYVVDLIDIKQQQPG  
DDLLSALVTIEQDGDRLSRDELTSALFLILFAGYENTANLIASAVLWLLD  
HGGLNVVPSSEAIEGTLRHEPPAPVAIRRFPTEDIIIGGVTI PAGDTVLL  
SIAAATRGADGNAARLAFNGPHYCLGAALARVEAEALTVLARRLPGLT  
LAVPPSQVRWRPTFRTHGPAELLVGW

>CYP163B16 (2515702571) *Salinispora arenicola* CNH964

VTAADPGRVSGESQTPAHTVDLADPATFANRDLTGFWQQLRDEEPIHWN  
PPTSGRRGFVVVSRADILDVYRDDVTFTSERGNVLVTLLAGGDAGAGRM  
LAVTDGPRHAELRKLRLRALGPRVLAPVCAAVRANTRQMVREAVTKGEC  
FASDIASRIPMMTISNLLGVPDADRAFLSLTKTALSADDESISETESAM  
ARNEILLYFQDLMEFRRDHPGEDVVSMLVNSTIDGAPLSDDDIVLNCYSL  
IIGGDETSRLTMIDSVNTLAAHPKQWRRLKDGQCEIDKAVDEVLRWASPS  
MHFGRVAAKDTILRGVQIRADDIVTLWHASGNRDERVFHRPEVFDLGRTP  
NRHLSFGHGPHYCIGSYLAKVEISELLIALRDLTSGFETTGEFQIRSNL  
LTGFSTMPVRFVDPDRAGLARDALDG

>CYP162P1 (2515702817) *Salinispora arenicola* CNH964

MGLPSEVDLAEPDLADPDLYAEGDPDAEWAWLRAHRPVYRNPAGATAEFW  
ALTRYRDALQVYRDPSTFSSERGMVLGVDPVAGDPAAGRMLVVTDPPRHP  
KLRRIVSGIFVPRMTMRLEGRVRSVLDQLLHRVVDGAGRCDFANDVAARL  
PVAIIICELLGVPADQDWMYHLTSTAFFFFGDPAGSAEVS AVERAEAYGDI  
LLYYGELAAERRRRPGDDLVTLLVHADLDGEPLDVEDVLVNCTNLIIGGN  
ETTRHAASGGLLALAQRPELWRRRLRETPTAVPTAVEEVLRWTTPGMHVLR  
TATRDTEIGGVPIRAGERVVVWNAANRDEDVFADPQRFIDIRSPNRHIA  
FGQGGHHLGGAALARLELTILFEEMAKQVTNVRLTGVPVRRVRS CVLRGIR  
ALPVELVT

>CYP211B19 (2561667155) *Salinispora pacifica* CNT403

MDASEAVALLMSPGRRDPYPTYERLRAHGPPVATAAGFVVVTGYTEADTV  
LRNPRFGVMDDEERDGVFPDWQDSPAMMSISQSMIRANPPDH SRMRRLAA  
GVFTPRRVAALREVVAQADELIDELIRAGRGAPVDFLG SFAYPLPVT  
ICALLGVPAADWAQFRRWASELTAVLEPEITPQELAVADAGATELRDYFT  
ELIAQRRRDPADDLTALVQAHDADGDRLSGEELLANLVLLL VAGFETTT  
NLLGNGLFVLLTHPDSATALRGQPELAPSYVEELLRYDSPVQLTSRTVRE  
SVSLGGVELPAGSWLLVLLGAANRDPARFTDPARFDPGRAQSPPLSFGAG  
AHYCLGAGLARLEAQVAFPLLLRRLPELSLAGEPVRRSRRLTLRGYETLPV  
TVGAVAADHGTPAGAALGTP

>CYP105AB29 (2561667974) *Salinispora pacifica* CNT403

MTETASITTPGTSSTTTSGPASGQVTDAEFFPVERGCPFSTPVEYEQIRDH  
SPLAKVRLTTGREAWWIAGHELGRAVLADRRFSSDRRRDNFPFVSTD PET  
RKQLQDQPTSMIGMDGAEHAQARRALMGFTVRRMAGLRPRIQQIVDQHI  
DEMLSSEQRSADLVEALS LPVPSLVICELLGVFPYADHDFQAHSGPLIRH

TTPSEVRLRIQEELNTYL GALIDRKVTDPTDDLLSRQIAKHHAAGTFNRT  
SLVSM AFLLLLIAGHETTANMISLGVVGLLQHPDQLAMIKEDPEKTPPAVE  
ELLRYFTTIADTVTARVATEDVQLGDTTINAGDGVVISGLAADHDPTVFTD  
PDRIDLERGARRHHVAFGFGPHQCIGQTLARLELQIVFDTLFRRIPTLRLA  
APLDDIPFKSDAFVYGAEKLPVAV

>CYP244A5 (2561668267) *Salinispora pacifica* CNT403

MSATTNAELGEAPETSMPIDPGLFDCMPDLIAAARIAPVVRIPIYLGRHAW  
VVCDELVKQALHTHPKMGKDIALVPEWMRQPGLMVT AQPPPEYARAMIMS  
DGENHARIRRIHAPVLSRNTERWGEQVADKVEGFLDELSKAAAGSNAEV  
DVVTNYTHKIPLAFISEMLGLPPAAEHRLRSITDIMLYSSDYAARREAIG  
GLFGAVEEWVRNPDGLRDGVITGLLAGSDGPGAAVTEGEVIVWTLGMIIT  
GYETTGSLISTSLYEALRRPPHERPRTDEDITAWIEETLRVHPPFPHTW  
RFPLEDIELGGYLIPKGAPVQVSI AAANRQPGEGADSFDAERRGHGHL SF  
GLGMHYCIGAPLVRLEAKIAVRGFLRRFPQARLSADTAVQWESEWMIRRM  
SSLPVLS

>CYP245A11 (2561668271) *Salinispora pacifica* CNT403

MSSTTLPRFTLTGWNREDIVNPYPVYRRYREVA AVHRGEAGSDAPETFYV  
FSYDQVAQVLSSSCFGRGRSLDATAASVPVPADQKALRAVVENWL VFMDP  
PRHTELRSLLNRSFSPRIVTGLRPRIARIAQELLSRLGRQVETDLVEGFA  
APLPILVIAELLGIPAGRHWLRTNALALQEASSSRARRDTAGYARAEAA  
AQEFTEYFREQVRLRRGSTGDDLLTILANAQLRGVPVSLDAVVGTA VHLL  
TAGHETTNTSLAKAVLALQAHPAVLEELRGADGLTADSIEEFLRYDPPVQ  
AVTRWTHQD TTLGGWEVPRGSRVVALLG SANRDPARFPLPDALDVHRPAD  
RHLGFGGLGIHYCLGATLARA ELEIGLQTLLNGLPTLGHPAQYVDYADDMV  
FHGPSRLILVNPGERFCQ

>CYP107AW6 (2561668354) *Salinispora pacifica* CNT403

VETVTGTSAPPPVPYIADPYPTLARIRANGPV SILHSDEGVPMWVIARYR  
EVRAALADPRFGQDARRAQALADNRVAGVT LGGDIVHMLNSDPPDHTRLR  
RHVQGAFTARRVAAMRPLVERITTSLLDGLAGRKSVDLVQDLAFPLPMLV  
ICELLGFPAEERNAYRSWSTAILTHDDDP AVFATALREMTDYIAVQLRLR  
RSRPGDDLLTELLAERDAGQLTDDEIVGMVFLLLIGGHETTVNLLGTATL  
ALLRNPDQHRWLLANGHALPEAIDEFLRYESPVAMATLRFTTTPVTVDDV  
VIPAGELVLVSLGGANRDPDRFPDADRLILD RRDTGH LAFGHGLHRCLGA  
FLGKLEGEVALGALLRRHPKLALATEVRQLQWRDTIMLRGLES LPVSLHG

>CYP107AX9 (2561668367) *Salinispora pacifica* CNT403

VTAQPAPVFDQRLLRDPHRRYNALRDQAPVHRVRTPDGAPAWLVTRYDDV  
RAAFIDPRLSVDKRFSGTDGEHGSSLPPELDAHLLNRDPPDHTRLRLRLAA  
AAFTPRRVADLRPAVEKTVSTLLDGLAGNDHAELIGSLASPLPLQVMHEL  
LGLPTQTSVDFRTWTNTLLSADANQPAQSR SAMANMRRFLIEQLAHKRAQ  
PGDDLLTGFLCVREDDDGLTDDELVAMLFLLMFAGYDNTAALIGNVIHAL  
LTNVELAEAVRTGSLAVDELVDGVLRWNP SFPLAVRRFAREPITIAGQTI  
PAGDRIWLCLASANRDP AHFTEPDEIGIADMRRPHLSFGHGIHYCLGAPL  
ARLQTTVAVASLFD RFPGIRLAVPVQDLQWRESFRLRGLVALPVSL

>CYP125A66 (2561668783) *Salinispora pacifica* CNT403

MTEPRI PVGFDFTDPAVLERRVPREEFAELRR TAPVWWNAQPKGSAGFDD  
DGYWVVTRYADVMAVSRDSEYSTRENTAIARFQPGTTQADREMQRVIMI

NVDPPEHTKLRAIVSRGFTTPRAINALRGS LGERAERIVRDAAGRGTGDFV  
TDVACELPLQAI AELIGVPQHRRKVFDWSNQLIGYDDPAYGVDPLAASA  
ELLAYAMEMAHERQRNPSDDLVT KL VNAQIDG EHLTADEF GFFVMLLAVA  
GNETTRNAITHGMLAFLENPEQWELFK AERPRSAVEE IIRWATPVNVFQR  
TALVDTTLAGQAISAGQRVALFYGSANFDES VFEEPERFDITRSPNPHLG  
FGGSGVHFCLGANLARLEIELIFNSIADHMPDIRKVADPQRLRSGWINGI  
REL PVR YH

>CYP211C6 (2561668914) *Salinispora pacifica* CNT403

VPDIEGLLTRLYSAQGRQDPYPVYADLHAQAAIAALEPRPERQRVA AVAV  
GYDLVA AVL RDPEWFKQPPPDWRDQEILRLIQSSMMFINPPDHGRMRHVF  
AGTFTPRRLGALEPVINRV TDELLDRMADAGPGEVDFVAEFAYPLPARVM  
AEFIGIPATELAWYRDRVDRVDAFLDVAGKTPERLAAAANAAGAE LRSFYR  
ELLAHRRRTPEGDLISGLVEAVDAGGVELTEDELISNLIVLFNASFVTTV  
YLLSNGLPVLLAHPEVAAALASSPELAAGAVDEILRLQTPVHLLARAAPR  
DMVLGGVSI PQGQSVLLLLIAAANRDP AHFPDPDRFDRPRSSPPSLAFGLG  
LHYCLGATVSRLEGR LALPRLLSRFPRLRILEQPVYSGSLFLRGIDKLSV  
SPGGREHP

>CYP208A26 (2561669302) *Salinispora pacifica* CNT403

MTVIADRGGRVPPGPPV TAGLRLLLLALGRDRLGMLTSAATEFGDVARLPV  
GPKRLYFFNHPDHAKHVLADNHANYAKGIGLVHARRALGDGLLTSDGELW  
RKQRRVIQPAFLSRRLAQYAGVVGQEATRLAERLATRV DGPPVDVLDEMT  
RLTLGVLGR TLLDAELTG F HGVGESFAAVQDQAMFELETLSAVPTWIPLR  
RQRRFRRRARRHLQEVVDVLA AERGQNV EGRDDVLSRLILSTRAEADAALG  
RQRLRDELVTLLLAGHETTASTLGWSLYLLDQHPQLRERVRHEATSVLGD  
RVPGYADLHQLQYTAMVVQEAIRLYPPVWILTRKARAEDEVGGYRV PAGA  
DLLICPYTLHRHPRFWEEPGRFDPERFDPARLTNRPRYAYVPFGAGPRFC  
VGNNLGMLEATLVLA VLLRDLRLEGLPGRAVVPEPMLS LRVRGGLPMMVR  
RAD

>CYP105BL3 (2561669578) *Salinispora pacifica* CNT403

MSSHSAAPGPETATPLHTLAPELTFPQFERATPFDPPEAYTELSGRCPV  
APVRMADGKPSW LITSFEGVRAALSDPRLSSDMSHPGFNRTGKPVDDL  
KDTLGAMDGERHRYRRLMTGELTVRRAKAMRPVITQITDEALDQLAAAG  
PGADLVTHVALVVP SRVACHLVGIP LSEYELFTGMAAKLMDSTSNADQIA  
ALQDMVSYFDTLVT DREHHRDDLLGHMVRRYLATGELDREMLIRLAWTT  
MAAGQETTAHMI GLGVAALLRHPDQLELLRREPHLM PGAVDELMRYLPMI  
QFGIPRVAMDDVEVDGQTVTAGEGVVALPPLANRDP AVFERPDELDVRRN  
ARQHL SFGY GPHQC PAHALARLELEV VYGRLLERFPTLRLADSDADLKVQ  
DEDIMYSVSELAVAW

>CYP163B20 (2561669611) *Salinispora pacifica* CNT403

VTATEAKYVGQVGSRNAASTIDLADPATFAGHDLTNFWQRLRDEEPIYWN  
PPTGGRRGFVWLSRHADILEVYRDDMTFTSERGNVLVTLLAGGDAGAGRM  
LAVTDGPRHAELRKLLLRALGPRVLGPVCRAVRANTRQMIG EAAAANG ECD  
FATDIASRIPMITISNLLGVPEADRASLLKMTKTALSADDESISD TDSEM  
ARNEILLYFQDFVEFRKNPGE DVVSM LVNSSIDGVPLSDDDIVLNCYSL  
IIGGDETSRLTMIDSINTLAANPGQWRR LKEGRCDIDKAVDEVLRWASPS  
MHFGRTAVRETVIHGERIQVDDIVTLWGASGNRDERAFKRPEVFDLDRAP  
NRHLSFGHGPHYCIGSYLAKVEISELLIALRDLILGFEVIGEPQQRIRSNL  
LSGFSTMPVRFHADRTGLASEAREG

>CYP162A8 (2561670030) *Salinispora pacifica* CNT403

MISPDLSDPFTFYQNDDPLPVWAE LRREHPVYDNRRADGTRI WAVMTHKLC  
TDMLTNPKVFSSANGMRLDSNPRVLARAAGKMLNVTDP PQHDKIRKLVSS  
AFTPRTIRRLEANMRATAGRAIDTAIADGGCELTRLAHKLPVSVICDLLG  
VPEQDWD FMAERTRFAWGSTAADDREEVEKVA AHT EIMAYFLDLAADRRK  
RPMEDLVSALVHGEVDGRALTD EDVLYNCDALLSGGNETTRHATVGGFLA  
FVMNPDEWSAIRQNRDLLPSAIQEIVRYTSPVMHSLRTATRDVEFGGINI  
RAGEYVVAWLPSANRDEQLFDDPDRFNIRRS PNRHLGFIQGNHYCIGAGL  
ATMELRVMFDELLNRVSEVRLAGPARRLR SNLLWGFDSLPVT FHVAGAGR

>CYP1269A2 (2561670223) *Salinispora pacifica* CNT403

MTTPRTDRPYGTPGIGSAVLERGTVRTEGMALDAGQRRRLQLAQGLLWLR  
AASGDPFAALLRDHDEDEEAALYARLG GGAPIWRSSTGTWVVRHRTATAL  
TADPAVEDRIVGWRPLGIPVMP LGEQDLGLHPENREALLSLARA EVAKDA  
LVERRPRWAVAVRRRLDRAGDGRIDLAELAAGISV DMLAEQLDLPGTEMG  
WFSDLASHAGLAADGLLCPQDMRRT HDMLAGIAELRERFAGRPFAMILAV  
FGVRVCADLLRNALAALLAEPAGWAGLRAEPASAAAVVDEILRHDP PVRV  
QLLEAVADTTAHGVPITAGDQIAVLLAVANRDAEVFPEPDVYRPGRPVSP  
DRPVLLPGWPAGPVLPLARAQTVTALTELAGRFPVLEAAGPVIREVRAPV  
TRAIREL PARADRRVRRP

>CYP107AY7 (2561670567) *Salinispora pacifica* CNT403

MRAEPAPIPRSGARLGQEYDQLRKAGDVHQVLLPDTSLAWLVTSP ELVSR  
ALADPRLALNRKHSRGGWSGFALPPALDANLLNLDAPDHTRLRRLVGP AF  
SPQRVAALRPRIERTAELVDTVVATGSPVDLVTGYCTPLSVQVIADLLG  
VPEAGRTDLRAWDTMLTSYPPDRDAIRQAVVELHG YVVNLIEAKQKRPG  
DDL LSALVATEQEGDRLTRDELTS LAFLILFAGYENTANLIAS TVLRLLD  
HGSLRGVRASEAIEETLRLEPPAPVAIRRFPIEETTIGGATIPAGDTVLL  
SIAAATRGTDGNSARLAFGNPHFCLGAALARVEAEEAITVLARRLP SLA  
LAVPGAPVRWRP TFRTHGPAELLVTW

>CYP208A21 (2561671387) *Salinispora pacifica* CNT403

MTTTSIDHRRPPGPPRAAALSMLLTMSRDRLGMMTAAARAYGDAAWLPVG  
HKALYFFNHPDYAKHVLTDNSDNYTKGIGLVHARRALGDGLLTSEGELWR  
KQRRVIRPSFRSGRAPDQASVIAEEVASLVERLRARAGGPPVNVVTEFTG  
LTGLVGLGRTLDDVLTALATVGDAFAAVQDQAMFELVTL SAVPTWIPLRR  
QRRFRRARAELE RIVDDLVARRGDVSGRDDVLSRLILSTGAEPDARVRRQ  
RLRDELVTLLLAGHETTASTLGWTLYLIDRHPPVRERLRAEAVEVLGDRL  
PAYRDLPLRFTTMVVQEAMRLYPPVWLLPRRSRRADRVGPYRVPAGSDV  
VVSPYTMHRHPGFWEPEPDRFDPLRFDPRNAADRPRYAYLPFGAGPRVCVG  
SNLGMMEAVIAVAMLCRELRLVRVP THAAVPEPMLS LRIRGGLPMSVHLA  
D

>CYP154M16 (2561671398) *Salinispora pacifica* CNT403

MPDRCPVLDP SGRDIHAEADRLRAQAPAVKVELPGGVHAW SITSYDVVKR  
LLLDRNVTKNARNHWPKF INDEIPPDWEMISWVAMDNMVTAYGKHLVRLR  
RLIAKAFTAQRVETVRPQVEKLVDEL LDGLAAETGEVVDLREKFCYPLPA  
LLIAELIGMTEQQRAQTAKAMDLMVDTTVSPDQAQAILTGWRTAMDELIA  
AKRREP GKDIASDLIAARDDENGGQLTDSELTD TIFAILGAGSETTINFL  
DNAVTALVTHPGQLELVRSGRAGWDDVIDEVL RVQCPLASLPLRYAVTDI  
ELDGVTIPQGDPI LINYAAAGRDPALHGDTAGEFDVFRENKEHVSFGHGP  
HYCLGAGIARLVATIGLSRLFERFPDLRLAVPAEELQPLPTFIMNGHRAL  
PVRLVPAPAAATAV



>CYP1005A8 (2561671476) *Salinispora pacifica* CNT403

VS AVLFRSWTKTVGTHWPAVTRVADQQGTEHLVVTEHELVRQVLTDQVTY  
RPDNALDAVTPIPVPA LRVLAGHRFRLLPPTLANNGGVSHPAIRALVADAL  
HPAKVAAQR PWLTKLVAERVAAIGATLDSGGAADLHAELSADLPLLVLAR  
LVELPDAPVSAVKQFARAALALFWAPLDADRQLALADEVGRFHQVLRIFA  
DTGGGLAAALRATGHPPDVLVGALFFLLVAGQETTSQFLTLLHLRLAGEP  
TVRAALRDGGVSVANVVEEGLRLEPPIVTWRRVAAVDSTLGGTAVPAGTN  
VLLWLARAGRDP AIVPAPDEF RPRGQGRSRRHLAFGAGAHRC LGDQLARME  
AAVVVEQAAPLLDGISVVRAPWYPDNLTFRMPDAFVIRR

>CYP107CT3 (2561671528) *Salinispora pacifica* CNT403

MTGASGDRGTGQCPIALDHDFYADPHPAYRVIKENG NKPTPIVLKTGMAYL  
PPGLEAWLVTAYEDVEFVLRDPRFRKSID EAMPLFAAQSGGTVAARGSL  
YNNMANNDPPVHTRLRKPLNAMFTSR SVAGRRDVRSAALETLEKVAGSQ  
TFDLVQDFAFPFSSISVISRTLGVPDADRGT FHGWVQTITGAAPPEILRRD  
AGLMVEYLRGLIRGRRESAGNGTDDVLTLLATSLAEDEAVAQAYALLAAG  
YETTANLIVTGFLTAAHPEQLRRLWSDPGLVPDAVEEMLRHQSPFNLSL  
YRYVTEPVELNGVRI PRGAIVFLAFAAANRDECRFTEPDSFDITQPHRDH  
LAFGGGIHNCIGKHLARMEAQVAFETLIERCPGLAVHTPDEEFDWKASPT  
FRGLRTL RVGPGPAPGGWEREQ

>CYP1005A6 (2550580746) *Salinispora pacifica* CNT-133

IVPAPDEF RPRGQGRSRRHLAFGAGAHRC LGDQLARMEAAVVVERVTLLDG  
VTVVRAPWYPDNLTFRMPDAFVG

>CYP1005A6 (2550581507) *Salinispora pacifica* CNT-133

ADEVGRFHQVLRIFA DTGGGLAAALRATGHPPDVLVGALFFLLVAGQETT  
SQFLTLLHLRLAGEPTVRAALRDGSVSVPNVVEEGLRLEPPIVTWRRV

>CYP208A30 (2550581741) *Salinispora pacifica* CNT-133

MTVTAAGRTFSGPTGSALLRSLWQLGRDRLGLMTSAARYGDAVRLGVGSR  
SLYFFNHPDHAKHVLADNSGNYTKGIGLVHARRALGDGLLTSEGE LWREQ  
RRVMQPVFQAKRIAGQAHAVAEADRLRLARRRG GGPVNLTDEFTALT  
LGVLRGTLLDAKLDAFASVGAAFEEMQNQAMFEMASMSLVPMWVPLPQQ  
RFRRARRELERIVGRVLADRTARGEVTGADDALSRLIAATQDEPDPGFAR  
RRMRDELVTLLLAGHETTASTLSWTFHLVNQHPWVRGRLRKEAIEVLGDR  
LPEYADLARLTYTKMVVSEAMRLYPVWML SRLARDADVVDGYPVPARAD  
VLICPYTLHRHPAFWPEPERFDPERFDPGAVTDRPRYAYVPFGAGPRFCI  
GNHLGLMEAVFVVMVSREFELVAPVGQPVVAEPMLSLRIRGGLSMTVEP  
VS

>CYP107AW10 (2550583049) *Salinispora pacifica* CNT-133

VETVTGTSTPPPPMPYIADPYPTLARIRANGPV SILHSDEGIPMWVIARYR  
DVRTALADPRFGQDARRAQALADNRVAGVT LGGDIVHMLNSDPPDHTRLR  
RHVQGAFTARRVAAMRPLVERITTSLLDGLTGRTTVDLVQDFAFPLPMLV  
ICELLGFPAEERNAYRSWSTTILTHDDDPAA FATALREMTDYIAVQLRIR  
QTRPGDDILTELLAARDAGQLTDEEII GMVFLLLIGGHETTVNLLGTAIL  
ALMRNPDQHRWLLANQHALPKAIDEFLRYESP VAMATLRF TTTPTTIDDV  
VIPAGELVLVSLGGANRDPDRFPEADRLILD RRD TGHLAFGHGLHRC LGA

FLGKLEGEVALGALLRRHPRLALAAEVRQLRWRDTIMLRGLESIPVSLHG

>CYP105AB37 (2550583866) *Salinispora pacifica* CNT-133

RHTTSTEVRLRIQKELNTYLALIDRKVTDPTDDLLSRQIAKHHAAGTFD  
RTSLVSM AFLLLIAGHETTANMISLGVVGLLQHPDQLVMIKE

>CYP125A65 (2550584638) *Salinispora pacifica* CNT-133

MTEPRIPVGFDFDTPAVLERRVPREEFAELRRTAPVWWNVQPRGSAGFDD  
DGYWVVTRYADVMASRDSEYSTRENTAIARFQPGTTQADREMQRVIMI  
NVDPP EHTKLRAIVSRGFTPRAINALRGSLAERA EHIVRDA AVRGTGDFV  
TDVACELPLQAIAELIGVPQHRRKVFDWSNQLIGYDDPAYGVDPMAAAA  
ELLAYAMEMANERQRNPSDDLVTKL VNAQIDG EHLTTDEF GFFVMLLAVA  
GNETTRNAITHGMLAFLEHPDQWELFKAERPRSAVEEII RWATPVNVFQR  
TALVDTTLGGQAITAGQ RVALFYGSANFDES VFEEPERFDITRSPNPHLG  
FGGSGVHFCLGANLARLEIELIFNSIADHMPDIRKVADPQRLRSGWINGI  
REMPVRYR

>CYP1005A6 (2550585481) *Salinispora pacifica* CNT-133

VSAVLFRSWTKTAGTHWPAVTRVADQQGTEHLVVTEHALVRQVLT DQVTY  
RPDNALDAVTPIPVAAALRVLAGHRFRLPPTLANNGGTSHPAIRALVADAL  
HPAKVAAQR PWLT ELVAERIAAIRATLDSGGSADLHAELSADLPLLVLAR  
LVELPDAPVSAVKQFARA ALELFWA

>CYP113B7 (2550585872) *Salinispora pacifica* CNT-133

MTQTDNAPMPPLDL PKGADAQGLLDWFAYMREHSPVSWDETRQAWHVFN  
QDYLTVTTNPLIFSSDFS PVFPVPPELALLMGPGTIGGIDPPRHGPMRKL  
VSQAFTPRRIAQMEARIETITADIFEQVRGQERIDIAADLAYPLPVTVIA  
DMLGIPNEDHEKFREWVDIILSNEGLEYPNLPDDFTETVGP AIAEWSEFL  
YAQIAEKRAR PQDDLMSGLLAVEVEGRRLTDEEVVNIVALLLTAGHISSA  
TLLSNLFLVLEEHP EALAAVRADRS LVPGVVEETLRWRSPFNCIFRLLAQ  
DTEIFGQP

>CYP107LA2 (2550586648) *Salinispora pacifica* CNT-133

CSGAILARSYPRLSIAAGAGRDVPRASPRIQEAEGLMGMPPEAHARLRRL  
VATAFTPRRVRDIAPRVAE IADRLVNDVIETGPPADLVRQIALPVPIITII  
CELMGVPAEDQH VFRVFS DALMSSTRYTDDEVDQAVQEFTAYLGGLLTQR  
RAHRTDDLIGALIEARDDGERLSEEE LIMLTGGLLVGGHETTASQIASHL  
LVLLRDRARYETLSARPELIPTAVEELLRVAPMWVTVGP TRIATEDLELN  
GVTIRAGDAVIFSLSSANLDEDAFPDATDVVLDREPNPHIAFGHGPHFCI  
GANLARLEIQSTIGALVRR

>CYP107E37 (2550587493) *Salinispora pacifica* CNT-133

VTIDQEIRKYPFRES PGIGIDPTYELLRRTEPLARVQLPYGEVSWLVTRY  
EDVKTVLTDPRFSRAAAQ GKDQPRTRAEMTYEGII GLDPPDHTRLRRLAG  
KALTARRVN AIRADAQRIANEYVDEMI AKGSPGDLVELFALPYPVTVICE  
LLGVPFEDRAQFRIWTEGLTSTSEQLMVYAEQLFGYMGKLVAQRRAEPTD  
DLLGALVKARDEGDRLTEQELLSIAGVGLLLTG VETVSTHIPNFVYALLT  
HPELMAQLRADRS LVPAAVEELLRMIPLNPAAMFPRYAVEDVTLSGITVR

AGQPVLVSLPGANRDPEVFENPETFDFTRDQNPVAFGHGPHHCLGAQLA  
RMELQVALHTVLDRFPDLRLADGDEGVSWKSGLLVRGPSRLLVGW

>CYP163B20 (2585373130) *Salinispora pacifica* CNT-133

MTATDAKDVGVGSRNVASTIDLADPATFAGHDLTNFWQRLRDEEPIYWN  
PPTSGRRGFWVLSRHADILEVYRDDMTFTSERGNVLVTLLAGGDAGAGRM  
LAVTDGPRHTELKLLLRALGPRVLGPVCRAVRANTRQMIGEAAAANGCED  
FATDIASRIPMITISNLLGVPEADRASLLKMTKTALSADDESISD TDSEM  
ARNEIILLYFQDFVEFRRKNPGEDVVSMLVNSSIDGVPLSDDDIVLNCYSL  
IIGGDETSRLTMIDSINTLAANPGQWRRRLKEGRCDIDKAVDEVLRWASPS  
MHFGRTAVRETVIHGERIQVDDIVTLWGASGNRDERAFKQPEVFDLGRVP  
NRHLSFGHGPHYCIGSYLAKVEISELLIALRDLILGFEEVIGEPQQRIRSNL  
LSGFSTMPVRFDADRTGLASEAREG

>CYP211B11 (2517949349) *Salinispora pacifica* CNQ768

MDASEAVALLTSPPGRLDPYPTYERLRAHGPPVSTAAGFFVVTGYTEADT  
VLRNPRFEVMDDEERDGVFPHWQDSPAMISISRSMIRANPPDHSRMRLA  
AGVFTPRRVAALREVVAQAADGLVDEMIRAGRGGAAVDFMGSFAYPLPVT  
VICALLGVPTADWARFRHWASDLTGVLPEEITPQELAIADAGASELRDYF  
TELIAQRRRAPADDLTALVQAHDADGDRLSGEELLANLVLLLVAGFETT  
TNLLGNGLVLLTHPDSATALRGQPELAPGYVEEFLRYDSPVQLTSRTVR  
ESVSLAGVELPAGSWLLVLLGAANRDPARFTDPARFDPRAQSPPLSFGA  
GAHYCLGAGLARLEAQVAFPLLLRRLPELALAGEPTRRHRLTLRGYETLP  
VTVGAVPADPGTPAGVALGTP

>CYP124M3 (2517949393) *Salinispora pacifica* CNQ768

MTVPIELDAVDLSDNDFWTKPLEYRHAVFNALRAQPGLPHFASPEFGSAP  
RGRGYALTRMDDVLAVSRNPSVVISGKGNVAMEVPAEFLDQSLITMDNP  
RHARLRRIVSRGFTMKAVTALMDNASQMAKQIVDEVVERGECDVAVDISA  
KLPLGIIICNMGIIPDSQQQFVFEQTNVMLGVQDPEYVGEQNDAMLAMSV  
SQELADLMHELATLRAKNPTDDLISKLLSAEVNGEALTPSELAHFFILLT  
GAGTETTRNAISWGIQLLTQSPEQREAWLSDIDGVTPTAVEEIVRWSSPV  
ISQRR TVAEDAEPVKLAGQLLGPDKVLMFYGAANRDPNYFVHPEGFDVR  
RSPNPHVGYGGPGPHFCLGAHLARLEISVMFRELLTRIPDIHATGEPARL  
KSPLINGIKRLPVAFTPGAR

>CYP208A22 (2517949414) *Salinispora pacifica* CNQ768

MTVIADRGGRIPPGPPVTAGLRLLALLGRDRLGMMTSAAA EYGDVARLPV  
GPKKLYFFNHPDHAKHVLADNHANYQKGIGLVHARRALGDGLLTSEGELW  
RKQRRVIQPAFQNRRLAQYAGAVGQEATRLVARLATRVDPVPDVLDEMT  
RLTLGVLGRTLDDAELTGFGHVGESFAAVQDQAMFELETINTVPTWIPLR  
RQRRFRRARQHLQEVVDVLA AERGQAVEGRDDVLSRLILSTRAEADPQLG  
RERLRDELVTLLLAGHETTASTLGWSLHLLDQHPELRERVRHEARTVLGD  
RVPAYEDLHQLRYTAMVVEEAIRLYPPVWILTRKARAEDEIGGYRVPAGA  
DILICPYTLHRHPRFWAEPPERFDPERFDPSRTTDRPRYAYIPFGAGPRFC  
VGNNLGMLEATLVLA VLLRDLRLEGLPGRAVVPEPMLSLRVRGGLPMTVR  
RVD

>CYP125A65 (2517949509) *Salinispora pacifica* CNQ768

MTEPRIPVGFDFTDPAVLERRVPREEFAELRR TAPVWWNVQPRGSAGFDD  
DGYWVVTRYADVMAVSRDSETYSTRENTAIARFQPGTTQADREMQRVIMI  
NVDPP EHTKLRAIVSRGFTPRAINALRGSLAERAERIVRDAAVRGTGDFV  
TDVACELPLQAIAELIGVPQHHRKVFWDWSNQLIGYDDPAYGVDPMAAAA

ELLAYAMEMANERQORNPSDDLVTCLVNAQIDGHEHLTTDEFGFFVMLLAVA  
GNETTRNAITHGMLAFLEHPDQWELFKAERPRSAVEEIIIRWATPVNVFQR  
TALVDTTLGGQAITAGQRVALFYGSANFDES VFEEPERFDITRSPNPHLG  
FGGSGVHFCLGANLARLEIELIFNSIADHMPDIRKVADPQRLRSGWINGI  
REMPVRYR

>CYP105AB28 (2517949985) *Salinispora pacifica* CNQ768

MTETASTTTTPGISSTTTSGPASGEVTDAEFFPLERGCFFSTPTEYEQIREH  
SPLAKVRLTTGREAWWIAGHELGRAVLADRRFSSDRRRDNFFVSTDPE  
RKQLQDQPTSMIGMDGAEHAQARRALMGFTVRRMAGLRPRIQQIVDQHI  
DEMLSSDQRTADLVEALSLPVPSLVICELLGVYPYADHDFQARSGPLIRH  
TTPTEVRLRIQKELNTYLGALIDRKVADPTDDLLSRQIAKHHAAGTFDRT  
SLVSMAFLLLIAGHETTANMISLGVVGLLQHPDQLAMIKEDPEKTAPAVE  
ELLRYFTIADTVTARVATEDVQLGDTTINAGDGVVISGLAADHDPTVFTD  
PDRDLERGARHHVAFGFGPHQCIGQTLARMELQIVFDTLFRRIPTLRLA  
APLDDIPFKSDAFVYGAERLPVAW

>CYP107AX4 (2517950449) *Salinispora pacifica* CNQ768

MTSQPAPVFDQLLLLRDPHRRYNALRDEAPVHHIRTPDGAPAWLVTRYDDV  
RAAFTDPRLSVDKRLSSTDGEHGSSLPPELDAHLLNRDPPDHTRLRLRLAA  
AAFTPRRVADLRPAVERIVSTLLDGLVGHDAQELIGSLASPLPLQVMQEL  
LGLPTQTSVDFFRRWTNTLLSADANQPAQSRSAMANMRRFLVEQLAHKRAR  
PGDDLLTGLLAAREDDRLTDDELVAMLFLLMFAGYDNTAALIGNVVHAL  
LTNTELPAAVRTGSLALDELVDGVLRWNPSPFLAVRRFAREPIITAGQTI  
PAGDRIWLCLASANRDPAQFTAPDTLGTTGMRRPHLSFGHGIHYCLGAPL  
ARLQTTVAVTILLDRFPGIRLAVPAHDIRWRESFRLRGLVALPVFL

>CYP107AW7 (2517950463) *Salinispora pacifica* CNQ768

VETVTGTSTPPPVPIADPYPTLARIRANGPVSILHSDEGIPMWVIARYR  
DVRAALADPRFGQDARRAQALADNRVAGVTGGDIVHMLNSDPPDHTRLR  
RHVQGAFTARRVAAMRPLVERITTSLLDGLTGRTTVDLVQDFAFPPLMLV  
ICELLGFPAEERNAYRSWSTAILTHDDDPAAFATALREMTDYIAVQLRIR  
QTRPGDDILTELLAARDAGQLTDDEIIGMVFLLLIGGHETTVNLLGTATL  
ALMRNPDQHRWLLANQHALPEAIDEFLRYESPVAMATLRFTTTPVAVDDV  
VIPAGELVLVSLGGANRDPDRFPDADRLILDRRDTGHLAFGHGLHRCLGA  
FLGKLEGEVALGALLRRHPRLALAAEVRQLRWRDTIMLRGLESPLVSLHG

>CYP1005A6 (2517951251) *Salinispora pacifica* CNQ768

VSAVLFRSWTKTAGTHWPAVTRVADQQGTEHLVVTEHALVRQVLTQVQTY  
RPDNALDAVTPIPVAAALRVLAGHRFRLPPTLANNGGVSHPAIRALVADAL  
HPAKVAAQRPWLTELVAERVAAIRATLDSGGSADLHAELSADLPLLVLAR  
LVELPDAPVSAVKQFARAALFWAPLDADRQLALADEVGRFHQVLREFA  
DTGGGLAAALRATGHPPDVLVGALFFLLVAGQETTSQFLTLLHRLAGEP  
TVRAALRDGSVSVPNVVEEGLRLEPPIVTVRRVAAVDSTLGGTAVPAGTS  
VLLWLARAGRDPAIVSAPDEFPRPGQRGSRRLAFAGAHRLGDQLARME  
AAVVVERVSPLLDGVTVVRAPWYPDNLTFRMPDAFVIRRGPAAGAAER

>CYP107FH3 (2517951870) *Salinispora pacifica* CNQ768

VPIELDEAFVQDPYAVYEKLRAEGPAHRVRMPPGVPLIGGLPVWLITGYD  
AVRAALADSRLSTDHLRIDGLFAQKDPDRSHRGGFSSALASHMMHTDPPD  
HTRLRKLVSKAFTTRAIEALRPRIQQTTDELTAADLAGYDVTVDLLDAFAFP

LPIRVICLLLGVPVAEQENFRSWSRALVSGHSPEAAATAATEVAAYLGDL  
VERKRHATTDVLTALVAAHVDVDDRLTHTELVSTAYLLFIAGFETTLNAL  
GNGTLHLMLHRDQWTALRADRALLDNAVEEFLRLESPLKHATFRCATESL  
RIGDAEIAAGDFVLLAIASANRDPRRFPDPHTLDVRRPAAGHLAFGHGHIH  
HCLGAPLARVEVRMAFDALLDAFPDMRLATDPAGLRWRNSTIIRGLDSLPL  
VHLNN

>CYP2054A3 (2517951875) *Salinispora pacifica* CNQ768

MSISADSEQVQGRFPDPYGAHRDDPYTFLAGLGVFYAPLLDAWCVTRED  
MVAVLRDDRSFSARDHNPRPAVALPDDVNQMFRTWRGAGAVAVGSLDPPA  
HAKIRDVLNIGFTP PARVRAFEPTMRAVAADLADRIDGAPEFDFIADFAPV  
FALEVIGRRLGVPDDYLDRCRTWSEQRIELMMAQGDADHDRLREFARGLM  
EFGEFARSLVRDRVADPRDDLISELLHDGKAGRTLTADEVAVQIPTLIFA  
GHMTCAEALGTIFYQQLRSPGGWARVVDRTIPVGD LVEEGLRFDSPLAGM  
YRTATRDVTVGGIRLTAGSRLLLLYGAAGRDSRAHACPAAFRPGDGSSGH  
LAFGHGHIHFCLGAGFARAE LRVAVEVLAARMPDLGLAPGRPPRFRPVFPL  
RALTEL RVTRSGGSGP

>CYP161N4 (2517951880) *Salinispora pacifica* CNQ768

VNTVAQLPFTQTHVLDVAPALRLLQSRGKVHRVRTPEGVPAWLVTGHAEV  
QQLLDDDRLSRSDPGGRDGGTALLNKLLGPLADDHPRLRSLLEPQFTPER  
LEPLRAVVEKLTEQHLDELATRTPPVDLRPALAMSLPILVLCEWLGVP AE  
DKGRFSVWTQDAAGVQDPERSQRLAELFGYCRQLVAAKRQDPGDDVISR  
LIATAGIGDTEVVALTALLLFGGYETTVARIGTGVL LLLTNPDQWAAVRA  
DPALVPATVDELLRRSMPNPHNGGMPRFAVTGF EIDGAAIRAGDLVLLNI  
IAANHDETAFPDPDRLDITRPTAGSLAFGYGRHSCV GAPLARMVLRVALS  
RLITRFPDLRLAVGVDELKLRHETLVGGGLVELPVTWGPR

>CYP107AY9 (2517952012) *Salinispora pacifica* CNQ768

MSQDQPTRAELAPIPRSGARIGPEYDQLRKTDGVHQVLLPDTSMWLVT  
PDLVSRALADPRLALNRKHSRGGWSGFALPPALDANLLNL DAPDHTRLRR  
LVGPAFSPQORVAALRPRIQRTAEELAETMVATGSPVDLVTGYCTPLSVQV  
IADLLGVPDAGRTDLRAWTDMLTSYPPDRDAIRQAVVELHGYVVNLIEA  
KQQRPGDDL LSALVATEQEGDRLTRDELTS LAFLILFAGYENTANLIAST  
VLRLLDHGSLRGVRVSEAIEETLRLEPPAPAAIRRFPT EEMTIGGATIPA  
GDTVLLSIAAATRGADGNPARLAFGNPHYCLGAALARVEAE EAITVLAR  
RLPGLALAVPGAPVRWRPTFRTHGPAELLVAW

>CYP244A10 (2517952032) *Salinispora pacifica* CNQ768

MQDTAQANLAEAPEVRMPIELRPTDCLPELLAAARVAPVVRTPYLDQHAW  
VVCDRELVKQALTHPKLGKDVALAPDWMRQPGQMVTAMP PPEYARMMVMS  
DGEHHARIRRIHAPVLSRNTERWSERVAALVDGFLDNLDSADGTEVNLI  
TDYTHKIPLAFTAEMLGPPGAERRLHDITEVMLYSADYALRQQAVGELF  
EAVQEWVRDPAGLRDGVVTGLLASADGPDATVTKGEAIVWTL SLIINGYE  
TTGSLISAALYEALRRPARERPHTDEAVA AWIEETLRVQPPVPHTTWRF A  
LADLDLGGYLIPRGAPVQISLAAANLDPDEDADS FDAQRRGRGHLSFGLG  
AHYCIGAPLARVQTKIALRGFLRRFPQARLSLDTAPRWESEWMIRMSVL  
PVLLA

>CYP107E37 (2517953525) *Salinispora pacifica* CNQ768

VTIDQEIREYPFRESRGIGIDPTYELLRRTEPLARVQLPYGEVSWLVTRY  
EDVKTVLTDPRFSRAAAQGKDQPRTRAEMTYEGII GLDPPDHTRLRLRLAG

KALTARRVNAIRADAQRIANEYVDEMIAGSPGDLVELFALPYPVTVICE  
LLGVPFEDRAQFRIWTEGLTSTSEQLMVYAEQLFDYMGKLV AQRRAEPTD  
DLLGALVKARDEGDRLTEQELLSIAGVGLLLTG VETVSTHIPNFVYALLT  
HPELMAQLRADRSILVPAAVEELLRMIPLNPAAMFFPRYAVEDVTLSGITVR  
AGQPVLVSLPGANRDPEVFENPETFDFTREQNPHVAFGHGPHHCLGAQLA  
RMELQVALHTVLDRFPDLRLADGDEGVSWKSGLLVRGPSRLLVGW

>CYP208A12 (2571086696) *Salinispora arenicola* CNS325

MTLDTITPRVPLGPPTAALRMLLVMKRDRLGMLSSAAARYGDASRLPVG  
HKALWFFNHPRYAKHVLADNSANYHKGIGLVHARRALGDGLLTSEGD LWR  
KQRKVIQPAFQSRRIAQQAGMIAEEAFALVERLRARAGAGPVELTAELTG  
LTLGVLGRSLLDADLAGFDSIGDSFATVQDQAMFELET LNAVPMWIPLPR  
QIRFRRARRKLQAVVDTLVDGRAGNLADRVDVLSRLILSARGEADPRVGR  
ERLRDELVTLLLAGHETTASTLGWTL SLIDRHPGVWERLHAEAVEVLGDR  
LPEYDDLRLRLRYTVMVVEEAMRLFPPVWLLPRRALAPDTIGEYRVPANAD  
VVISPYTLHRHPEFWPNPERFDPERFAPGQAADRPRYAYLPFGAGPRFCV  
GNNLGMMEAVFVIALLCRHLRLTGVPGYRLVPEPMLSLRIRGGLPLVVRP  
VS

>CYP107AY2 (2571087154) *Salinispora arenicola* CNS325

MTAEPTPIPRSGARLGQEYDQLRKTGDVHQVLLPDASLAWLV TNPEVAAR  
ALADPRLALNRRNSRGGWSGFALPPALDANLLNLDAPDHTRLRRLVGP AF  
SPQRVAALRPGIRRAAEHLDDTLVATSGPTDLVTGYCNPLSVQVIADLMG  
VPEAGRTNLRAWDTMLTSYPPDRDAIRRAVTE LHGYVVDLIDIKQQQPG  
DDLSTLVLTIEQDGDRLSRDELTSLAFLILFAGYENTANLIASAVLWLLD  
HGGLNVVPISEAIEATLRHEPPAPVAIRRFPTEDIIIGGVTI PAGDTVLL  
SVAAATRGADGNAARLAFGNPHYCLGAALARVEAE EALTVLARRLPGLT  
LAVPPSQVRWRPTFRTHGPAELLVGW

>CYP105CT1 (2571087186) *Salinispora arenicola* CNS325

MNSPNHMPADRSLTAPTSGCPMALSRGRVGLDVADEISELRDGGRLGRIT  
TAFGQEATLITRYDEVRAQMADSVVFNVAGVPSPPALVDGGFDTESVRRR  
RTVGNLIMLDPPEHTRLRRMVAAWFTTRRVERLRPRVVEIIDAA LDEMER  
SGPPVDLVAMFAKTVPITVICELIGVPEELRERYRRRAERAVSASAVSTP  
LDELRLREAGWVSRELIEYHRENPSDDIIGMLLREHGTD SYDDGITDDE  
LVGLANALLIAGHETTTQMLSMGTLALLRHPDQLALLRDDPSIVAGAVEE  
LLRYVGVLHGGFVRVATRDTRLGGHRIHAGELVVPALTAANRDPRL LTDG  
DRLDITRPPTSHVAFGHGVHFCIGAPLARMELREAF FALLRRFPGLRLAV  
PDSELEFTQGTTVYSLRGLPVTW

>CYP154M5 (2571087203) *Salinispora arenicola* CNS325

VEQSCPYKLDVTGRDVHAEGEAI RARGPVAQVELPGGVQGWSVTGYQAAR  
QVLADPRFAKDPKKWPAYTSGAIPPNWPLIGWLLMDNMTNDGADHQRLR  
KLVS HGFTPRQVERTRPLIVKIVNDLLDGLSSAGPDEVVDLKGRFATPLP  
ARVICDMFGVPEALRASVLGAQVNV TSSISGEEAEANVEQWHRELLELV  
EAKREKPEDMASLLIAAKEEDGSTLTQEEVVGTLHMLMGAGSETLMNAL  
SYAVLGMLSNPGQYEMVRNGTSSWDDVIEETLRAQAPVAQLPLRYATEDV  
AVGGAVIKAGDPVLMGFTAIGRDP AVHGETAGDYDITREDKTHLSFGHGV  
HFCLGAPLARLELKIALPALFERFPHMTLAVRPDQLEPQGT FIMNGHREL  
PVRLGQPATVLA

>CYP125A41 (2571087405) *Salinispora arenicola* CNS325

MTEPRIPAGFDFTDPEVLAHVRPREEFAELRRRTAPVWWNAQPRGSAGFDD  
DGYWVVTRYADVMTVSRSDTYSTRENTAIARLRPDTTREDIEMQRVIML  
NVDPPEHTKLRAIVSRGFTPRAINALRGLAERAHIVRDAAVRGVGFV  
TDVACELPLQAI AELIGVPKHHRRKVFDWSNQLIGYDDPAYGTDPLTASA  
ELLAYAMEMAERQRSPSDDLVTCLVNAQIDGHELTDEFGFFVMLLAVA  
GNETTRNAITHGMVAFLDNPEQWELFKAERP KSAVEEII RWATPVNVFQR  
TALVDTVLGGQAI SAGQRVALFYGSANFDEAVFEDPERFDITRSPNPHLG  
FGGSGAHFCLGANLARLEIELIFNSIADHLDPDIRKVAAPQRLRSGWINGI  
RQMPVRYR

>CYP211C1 (2571087554) *Salinispora arenicola* CNS325

VVDVEELLTRLYSAQGRQDPFPVYADLHAQGPIAALPPEPERRRVA AVAV  
GYDLVGAVLRDPEWSKAPPPGWTEQEILRTLQTSMMFINPPDHGRMRHVF  
AGTFTPRRLGALEPVVNRVADELDRMADAGAGGLDFVAEFAYPLPARVM  
AEFIGIPETELDWYRERVDVIDAFLDVAGKTPQRLAAANAAGAE LRAFYG  
ELLARRRRTPGEDLISGLVEAVDAGGVELTEDELVSNLIVLFNASFVTTV  
YMLSNGLPVLLAHPEVAAALATDPVLTAGAVDEILRLQAPVHLLARAAPR  
DTVLGGVPI PQGQNVLLLVAANRDP AHFPDPDRFDPWRS GPPSLAFGLG  
LHYCLGA AVSRLEGR LALPRLLSRFPRLRIMEQPVYSGSLFLRGIDKLSV  
SPGEGSTRE

>CYP211B2 (2571087644) *Salinispora arenicola* CNS325

MDVSEAI AVLISPSGR LDPYPTYEQLRAHG PVSRTTAGLFVVTGYAEADM  
VLRDPRFVVLDDDLRDDVFPHWQDSPAIKSIARSM LRTNPPDHSRIRRLA  
AGAFTPRRVAAMREVVTAQADELVD EMIRAGRDGARVDFMDMFAYPLPVA  
VICALLGVPAADR SRFRRWAGDLTGILEPEITPEELAGADAGADELRDYF  
TGLIEQRRRAPADDLTALVQAHDADGDRLSGEELLANLVVLLVAGFETT  
TNLLGNGLVVL LTRPEAAAAALRDEPD LAPGYVDELLRYDSPVQLTTRTVR  
ESVSFAGTELPADSWLLVLLGAANRDP RRFDPARFDPGRAQSQPLSFGA  
GPHYCLGAGLARLEAQVAFPLLLRRLPELALAGRPSRRTRLTLRGYETLP  
ITVGA VTADRGTPAGVAPGTP

>CYP105BL2 (2571087965) *Salinispora arenicola* CNS325

MSSHSAAPDPETATPLHTLAPELTFPQFERSTPFDPPQAYTELSGRCPV  
APVSMADGKPSWLITSFEGVRTT LSDPRFSSDMSHPGFNRTGKPVDDL  
KDTLGAMDGERHRYRRLTGELTVRRAKAMRPVITQITDEALDQLAAAG  
PGADLVKHVAFVVP SRVACHLVGIP LSYELFTGMAATLMDSTSSDDQFA  
ALQNMVSYFDTLVTDREHHRD DLLGHMVRRYLATGELTRDMLIRLAWTT  
MAAGQETTAHMI GLGVAALLRHPDQLELLRREPHLLPGAVDELMRYLPLI  
QFGIPRVAMDDVEVDGQTVTAGEGVVALPPLANRDP AVFERPDELDVRRN  
ARQHLTFGYGPHQCPAHALARLELEV VYGRLLERFPTLR LADSADLKVQ  
DKDIMYRVSELAVTW

>CYP105CH1 (2571088044) *Salinispora arenicola* CNS325

VSSLPLPTYPKLRDPADPLLPAPAEYLAIQSEKPIAKVLLPSGRPTWLITG  
HALARQVLTEPCVSVD RRRHPNFYPVPNPDAVVAQVARW TYILLGDDPPL  
HTERRRLLISEFTVRQAQAMRPRIQQLVDFHLEQLIAAGPGADFSKHFAM  
QVPSAVICEM LGVPFADHDYFQERTALQLRRDVPVAAQKQAIDELLAYFE  
QLIQEKSSHPGDDVLSRLIVSNRETEAFDHEALVALG LLLL VGGHETTAN  
TLTLATATMLERPEIAEQLR TDP SLMPSAVEEF LRYFSVAVAVSRIATAD  
LQVGGQLVRAGESMLLV LNTIARDGT VFP EPHRLDIRRNARNHLAFSHGI  
HQCMGQNLARVEMQIALD TVLRRLPGLHLVAPFEELPFKYRHLVWGIEEL  
RVAW

>CYP244A4 (2571088188) *Salinispora arenicola* CNS325

MSTTTNTELTEAPETNMPVDPGLFDCMPDLIAAARVAPVVRIPLYLGRHAW  
VVCDELVKQALTHPKMGKDIALVPEWMRQPGMLMVTAPDPEYARAMIMS  
DGENHARIRRIHAPVLSRPNTERWGERVADKVEGFDELDSQAGSGGSTEV  
NVVTNYTHKIPLAFISEMLGLPPEAEHRLRGITDIMLYSSDYAARREAIG  
GLFGAVEDWVRNPADLRDGVITGLLAASDGPDAAVTEGEVIVWTLGMIIT  
GYETTGSLISTSLYEAIRRPPHERPKTDEDITAWIEETLRVHPPFPHTW  
RFPLEDIELGGYLIPKGAPVQVSIAAANRKPGEAGDSFDAERRGHGHLST  
GLGMHYCIGAPLVRLEAQIAVRGFLRRFPQARLSAETAVQWESEWMIRRM  
SVLPAVLS

>CYP245A7 (2571088192) *Salinispora arenicola* CNS325

MPSATLPRFALTGWSRENIVNPYPVYQRYREVASVHRGEPGGDAADTFYV  
FSYDEVVQVLSSNCFGRGRSLDAAKASVPVPAEQKALRAIVENWLVFMDP  
PRHTELRLSLNRSFSPRIVTELPRPRIARIAQELLSRLGQQVDVDLIVESFA  
APLPILVISELLGIPEERRAWLRANALALQEASSSRAGRVDGYAQAEVA  
AQEFTEYFREQVRLRRGRAGGDLITILANAQERGAPVSLDAIVGTCVHLL  
TAGHETTTNSLAKAVLALREHPAVLDELRGAEGLTTDAVEEFRLYDPPVQ  
AVTRWAHQDITLGGCDIPGRSRVVALLGSA NRDPARFPSPDVLDVRRPAD  
RHLSFGLGIHYCLGATLARAEEIIGLQALLDGVPITLGYGTQHVDYADDLV  
FHGPSRLVLVNLGERCK

>CYP166A4 (2571088462) *Salinispora arenicola* CNS325

MTDAISFELPWARTDKFDPPAVFDALREQRPLARMRYPDGHVGWIVSSYE  
LVREVLGDPRFSHSCAVGHFPVTHQGQVIPTHPQIPGMFIHMDPPEHTRY  
RRLLTGEFTVRRTSRLTGHEGVATEQIEVMREHGAPADLVATFARPLVL  
RVLSGLVGLPYGERDRYLHAVTLLHDAEADPAEAAAAAYEQAGAYFDEVIE  
RRRRQPEDDLISTLVGDGELTGEELRNIVTLLLFAGYETTESALAVGMFA  
LLHHEDQLARLRADPTKIDAAIEELLRYLTVNQYHTYRTASEDIELHGEV  
INKGDSVTVSLPAANRDPARFACPAELDIDRETSGHVAFGFGIHCCLGQN  
LARVELRAGLSALLRAFPNRLRLAVPADEVPLRLQGSVFVKNLPVCW

>CYP105W2 (2571088687) *Salinispora arenicola* CNS325

MTGYQDRPTGDQPGAPVPSGSTDPGIGAFPLPRRCFPSPPAEYARLRAEH  
PVVRLPMLGGDTAWVVS RHADVRQVLSDFRMSADRRRPGFPKFAPTTEGQ  
RQASFANFRPPLNWLDPPEHAICRRQIVDEFVSRRVRQSRALVERVVDTH  
LDALTAAPGADLVSTFAYPVPSQVICEVLGVYPYGEHEFFERRSTLMFRR  
STPADERARCAREIRDFLDMVVTDKHRPGDDVLSRLLYRQRRAGGVDHE  
AVVSMAFVLLVAGHVTTSNMLALSVLALLTHPARLARLRAEPERFPAAVE  
ELLRYFTVVEAATARTATAEVTIGGVTIAAGEGVVALGQAANRDP RVFEH  
PDEFDPDRDARAHLAFGYGRHICPGQHLARLEMEVALSRLFRRLPGLRLT  
MEVSDLPLKEDSNIFGLYALPVAW

>CYP248A2 (2571088695) *Salinispora arenicola* CNS325

VLADAVTAFDPTAVDVRRDPYPSYHWLLRHDPVHRGAHQVWVVS RFADVR  
AVLGDERFARTGIRRFWTDLVGPGLLSQIVGDIILFQDEPDHGRLRGVVG  
PAFSPSALRRLEPTIEATVNDLLRPARALGAMDVVADLAYPLALRAVLEL  
LGLPAGDANTVGRWSRAVGRTLDRGATAEDMRRGHAAIAEFADYVERVLA  
ERREDGADLLALMLAAHRSQ LMSRNEIVSTVVTFFITGHETVASQLGNGL  
LSLLDHPEQLELVRRQPHLVPAVEECLRFDPVQSNTROLAADVELHGR  
RLRRDDVVVVLAGAANRDPGRYDRPDELDIRRDPVPSMSFGAGMRYCLGS  
YLARLQLRTALGAMVALPDLRLVCSPNELAYQPRMTFRGLTRLPVAFTPA



>CYP107FS2 (2571088758) *Salinispora arenicola* CNS325

MPVPQGEQNLTTTEVFADPKALFATLGSRQPLHRISLPDGMFAVLVTGNRE  
ARQALSDPRLVRSITAAAPELHKYHPLASDDYALSRHMLFADPPDHGRMR  
KLVSTAFTRRRVEQMRPRIQQITDDLIDVIAAKGEADLVETLALPLPIAV  
ISEMLGVFFADRSEFERHAEVLTGINASSGFDALIAAGRWFEYLAELVQ  
QRRREPQDDLISGMLAAQDKGDRITDVELRSNALLLSAGFETTVNLVAN  
GLLALLRHPEAMAAALRSEPNLMTTAVDELLRYDSPVSCVTYHFAQEPVEI  
GGFEIRSGEHVVIAAAAAANHDPTVFADPSRLDLRREGSGQILSFSGIHF  
CLGAPLARLEGEIAFGTVLRRLAGRLAVPTDSLWVKASFVLHRLERLPV  
TFTPDRAPNPIDSVHTV

>CYP105CN1 (2571088759) *Salinispora arenicola* CNS325

MAAPAPQATQSTTPHPPSYPLPRECPYRPSAGTARLRDAGPVSTVRLYDG  
RTAWLVTGAEEARALLADSRVSNRADFPNYPVMDERHLSMRATREMAREE  
EGGFAAALFGMDPPEHTRQRLQLLPRFTVRQVAARRPAIQRIVDEHLDAM  
EANGSPADLVSAFATPVPTMVVCTHLGVYPYQDRTRFEPVAVAGLFEPDRAD  
AAMAELTAYLHQLIETKQSEPGDGVIDHLIANHLRPGAIDRAELVAIASA  
ILVAGTVTTSSAIALGTLALLTAPGQYAAALVDNPDLPVGAVNEILRYLSL  
VEQLARVATEDIEIGGKLIRAGDGIIVSFAAGNLDPNVTTHPDRLDVALP  
PTNHAFSHGIIHCIGQNLALLELDIAFRALVSRFPTLRLAVPAEQQLPTY  
FAGDVPRLACLPTVW

>CYP105CP2 (2571088761) *Salinispora arenicola* CNS325

MTKSMPVQDLPAFPPIPRECPYRPSAQHVSLRSVGPMAKVRLYNGRTAWLV  
TDSAHAARAVLSDYRRVSIKPYHGNYPLLNEEFKVVDSGYADVLFVGDPP  
EHTRQRMIMPSFTLRRTAVLRPDIQRIVDDKLDEMRRHGAPGDLVTEFA  
QPVPMSMVSFLLGVFWEDHEEFETPAHKLFPVPELAEAEATELGAYLERLI  
QKKEQPGGTGGTGLLDDLIIRDHLRAGALSDELVHIAMAMLVAGTDTT  
NVISLGLTALLDNDPDQWAALRDNPDDELIPGAVEEILRYTSLIEAFARVAV  
SDIELNGAVIKEGEGILISSAGVNFDPALAPDPGRFDIRRPPRPSFSFSH  
GIHRCPGDNLARLELEIAFRSLVTRMPNLRRTAKPIDQIPSNNDGTLQRL  
YELPVVW

>CYP1005A1 (2571088899) *Salinispora arenicola* CNS325

VSAVLFRSWTKTAGTRWPDVTRVADQSGTEHLVVTRHALVRQVLTDQATY  
RPDNAMEAVTPIPVAAALRVLAGHRFRLPPTLANNGGVSHPAIRALVADAL  
HPTKVAAQRPWLTGLVADRVASIRTTLDSSGPDLYADLTADLPLLVLAR  
LVELPDAPVNAVQKFARAALELFWAPLDADRQLALADEVGRFHQVLRIFA  
DTGGGLAAALRATGHSPDVLVGALFFLLVAGQETTSQFLTLLHRLSGEP  
TIRAALRAGSISVADVVEEGLRLEPPIVWRRVAAVDSTLGGTTVAAGTS  
VLLWLARAGRDPVVAAPDEFRRPGQGRSRRHLAFGAGAHRCCLGDQLARME  
AAVVVEQATPLLDGVTVVRPPWYPDNLTFRMPDAFVVRR

>CYP105BN4 (2571089532) *Salinispora arenicola* CNS325

MTATADNPVSTEPFPYTRQGPFAEPPQYPAMVEQKVCVPTLANTGLRTWA  
VTGHERVRRILTDPRASASRKHENFFPYFVAPPQARTETSFIGYDAPAHA  
QARRKVAAAFTRQVRQVTRPRIEAIVDEHIDRLLSMPPPVDFHRLFSLSL  
PTTIIICEMLGIPQDDHDMIIEHSTNMFGGHSTPQQRVAAIVEMNAYLDTL  
IAQREKEPAAGLISTIIDEYRTSGEDFTRTDVVNMVRMLMNGGHETTASM

LSLGTACLLDNPDELAELLADPENRIEAAATEELLRMVTIGDVGVPVRALE  
DIEIDGVTIPAGDGILCLLLTANRDPEVFFPEPDRLNLSRGSRKHLAFGHG  
AHL CIGAE LARLEMQVAWLSLFRRIPGLRLATPLQHIPRKEGAIVYGVWN  
MPITWDA

>CYP105J3 (2571089687) *Salinispora arenicola* CNS325

MTDSVAFFPQGRVCPHQAPAGYRPLAVQRPLAQVTLYDGRRVWAVTTRDLA  
RRLLVDPRISSDRTNPAWPAIVPIVAAAVNDAQQKVLKIATALVGTGPE  
HKAQRKMLIPSFTRFRMNALRPMIQEIVDQQLDDEMIQSGAPTDLIPAFAS  
AVPVTVLYRLMGIPDDDHGIFEKLSHQLLAGPNANEAYDQLMGYMSRLIA  
ERRRNPGEGLVDDLLAQHGANDDADHDELVSTLVVQVAGNHGTTGSMIAL  
GLFALLQHPEQLAELRADPSLMPTAVDELLRFLSVPDVTRLAADDIEVE  
GTIIRQGDGVFFITSLINRDTDVHDAPNSLGWHHASAADHLTFGFGAHQC  
LGQSLARITMEIALGALIDRLPSLRLAVPAEEVPFLPAASLQVIAELPIT  
W

>CYP107Q4 (2571089729) *Salinispora arenicola* CNS325

MTTTAETS AETIDLFSPEVVADPFGWYARLREETGPTTGTLNIGTMMGGP  
EMWLVTTRYEDVRQVLTDPFRFLTNPADSPLEDIRAGVFKRLDFPPDLIPW  
MANLLNVSDGEDHTRLRKLVSALT AHRIGKLRPRVEKITADLLDKLAED  
GKDGSPVDLVEEYCYPLPVTVICELVGIDEPRPHWRAGDSMATMNGER  
IPTTLVKCIELARELIAKRAEPQDDLVTALVQAQAEQNRVSDDEIIGI  
LFSLVTAGHQTTTYLIGNSVILLLENPDQLARLKENPSMWPQAVRELQRL  
GPIQFAQPRFPSEDIELGGVTIPRGAPVAPL LLAANTDPRRFDPNKLII  
DRLAVGSEGLHGFKGKIHRC LGQHLAYQEA E VALQGLFTRFPDLSLAVPR  
EEIPWILRPGFTRTRTLPKLV

>CYP105G5 (2571089730) *Salinispora arenicola* CNS325

LTIETTETTPPADDSLAPLPRQFMQRDDPSKLPPALAALAEQSPVGRSTL  
PDGDPFWMVSGYDEARAVLSDPRFSSDRFRYHPRFKKLSGQLGERLRNDK  
ARAGSFINMDPPEHTRYRKLLTGQFTVRRMRQLTVRIEQIVTEQVDVMLA  
EGNSADLVSAFAVPVPSLMICELLGVRYEDRTEFQRR AAGLLQTDLP IKQ  
AVENLEAQRAFMQRLVTDKR RTPADDMISGLVHHAGAEPLTDDELVGIA  
TLLL FAGLDTTASMLGLGMFMLLQRPEQMAVLRDDPSRIGDAVEELLRYL  
TVVSTGLFRFAKEDVVLGDEHIPAGSTVVVSLMAANRDGRHWPEPETLDV  
TRVRSSHLAFGHGVHQCLGQQ LARIELTVGITELLRRLPNVRLAVPPADV  
PLRNDMITYGVHRLPILWDTF

>CYP1051A1 (2571089754) *Salinispora arenicola* CNS325

MATDAAITRARTVPAWKALPAAVRDTHRALVDVGNWSDGDVVRVSLGVSR  
PYLVTNPAHVQEVLHERAAIYPRGDDTALWRSVRKLVGDGILAEGDAAWAA  
SRRVLAPMFRPARINAMVDTMADAIAGAVDDLHGAATAGTPIDVGRELSR  
IVCSAIMRVFFADRITVRDALRIMKAQETIVTAMAPRILAPLVPWWIPMP  
GDRRFRAAVRSID DILLPVLRQAQRQPDDGDDL SRLVRARADDGRALSE  
KRMRDDLVSMVAVTTTETSTVVLTWLWPLL ANHPDVANRLYDEIDRVVGGG  
PVRGDHLAELTYTRMVLDELLRYPAGWILPRRAATTDVLGGVRINKGAT  
VILSPYVTQRMATAWWGPAAAEAFDPERFAAGREAADGRHRYAYYPFGVGMH  
RCLGEHLFNLEAILIVATLLSRFRFALTDTSMPGVKVAASTRPARTVEMI  
LKPVAVPPAR

>CYP105AB8 (2571090269) *Salinispora arenicola* CNS325

MTETASSRLTDTEFPVQRECPFAEPVEYEQIREQSSIAMVRLTGGGEAWW

ISGHEQGRAVLADRRFSSDRRKANFFVSTDPAIRKRLHAQPLSLISMDG  
AEHTQARRALIGEFTVRRRLAALRPRIQQIVDQCIDEMLTDDQHRADLVKT  
LSLPVPSLVICELLGVVPYADHDFQEHATLVRRNTASEVRQHSIDELNA  
YLGALIDRKLASPDDDLLGRQIARQHRDGTDFDRSSMVSLAFLLLVAGHET  
TANMISLGVVGLLQHPEQLAMIKDDDPDKTPLAIEELLRFFTIVDSVTSRV  
ATEDVRFGDDTTINAGDGVVVSGLSADWDPTVFADPDRLDLERGARHHLLAF  
GFGPHQCLGQNLARLELQIVFDTLFHRIPTLRLAAPLDKIPFKTDAAIYG  
ARELPVAW

>CYP107EU1 (2571090877) *Salinispora arenicola* CNS325

VTIGQTLPLDVYSPEFTRDPYAI FARLREQAPVCRVTTHRGMSAWMVTRH  
ADVRALLADNRLAKDGNRIGELMPRHSTLTGAATGFPPGLTTNMVNSDPP  
DHTRLRHLVGREFTGHRVEGLRPRIEEIVDDLLDGVAACGDEADLAETLA  
RRLPIAVIGELLGVPEADRAEFFRWADTLYGGTASPEALGQAYNAIVDYL  
GRLCDAKRDPADDLLTALVQVSADEDRLSREELVSMALLLLVAGHETTS  
KQISNGVLALLLNPEQLKLLKAQPARTAGAVEELLRFEGPSLSASLRFTT  
EPVEVAGVVIPEGEFVLLSLASGNRDPEKFPDPDRLDITRSTQGNLAMGH  
GIHHCVGAAALARLELEIVLSRLVARFPQMQLAVEADDLEWLVNSFFRAPL  
HLPVSLRR

>CYP1198B1 (2571091025) *Salinispora arenicola* CNS325

MSGELTDQRTAPGAGGNPLRSLMDHGI RANPYPLFGELREAGPTAVEDGS  
VVLFGHEYEHCSQILRHRDMGSDTSEAPSIKGFVVDDAERAGSSIFFMDQP  
GHGRQRLKLVSKSFTPRIVKSGFPQITHIVDGLFEDFRDKGELDVVTDLAY  
PVSIGIICDLFGIPDDERDMLKEWSDDLALSTELPTLGAAIGVLNVFTRD  
EINRFGSVAMAHAHYFADLIHRRRKNPGDDLVSLLATESNGERLTRFEV  
TSVLATLFVAAHESTTNLISGGILALLRNQDQMAVLRENPGIITNVVDES  
LRYDPPVHLAARMARARTTIGGYDLDPGTIVVVLMAAGNRDPRAYENPDV  
FDVNRKIRNVSLAFGAGAHFCIGSGLAKLEAEIAISAFQRLKHPEVDES  
SLEYRRHIVVRGLEHMKVSFQP

>CYP105BL2 (2566058131) *Salinispora arenicola* CNS296

MSSHSAAAPDPETATPLHTLAPELTFPQFERSTPFDPQAYTELSGRCPV  
APVSMADGKPSWLITSFEGVRTTSLSDPRFSSDMSHPGFPNRTGKPVDDL  
KDTLGAMDGERHRYRRLMTGELTVRRAKAMRPVITQITDEALDQLAAAG  
PGADLVKHVAFVVPVSRVACHLVGIPLSYELFTGMAATLMDSTSSDDQFA  
ALQNMVSYFDTLVTDREHHRDRLDLGHMVRRYLATGELTRDMLIRLAWTT  
MAAGQETTAHMI GLGVAALLRHPDQLELLRREPHLLPGAVDELMRYLPLI  
QFGIPRVAMDDVEVDGQTVTAGEGVVALPPLANRDPVFERPDELDVRRN  
ARQHLLTFGYGPHQCPAHALARLELEVYGRLLERFPTLRLADSDADLKVQ  
DKDIMYRVSELAVTW

>CYP105CH1 (2566058206) *Salinispora arenicola* CNS296

VSSLPLPTYPKLRDPADPLLPAPAEYLAIQSEKPIAKVLLPSGRPTWLITG  
HALARQVLTEPCVSVDRRHPNFYPVPNPDAVVAQVARWTYILLGDDPPL  
HTERRRLLISEFTVRQAQAMRPRIQQLVDFHLEQLIAAGPGADFSKHFAM  
KVPSAVICEMLGVPFADHDYFQERTALQLRRDVPVAAQKQAI DELLAYFE  
QLIQEKSSHPGDDVLSRLIVSNRETEAFDHEALVALGLLLLVGGHETTAN  
TLTLATATMLERPEIAEQLRTPSLMPSAVEEFLRYFSVAVAVSRIATAD  
LQVGGQLVRAGESMLLVNLT IARDGTVFPEPHRLDIRRNARNHLAFSHGI  
HQC MGQNLARVEMQIALD TVLRRLPGLHLVTPFEELPFKYRHLVWGIEEL  
RVAW

>CYP107Q4 (2566059072) *Salinispora arenicola* CNS296

MTTTAETSAETIDLFSPEVVADPFPGWYARLREETGPTTGTLNIGTMMGGP  
EMWLVTTRYEDVRQVLTDPFRFLTNPADSPLEDIRAGVFKRLDFPPDLIPW  
MANLLNVSDGEDHTRLRLKLVSYALTAHRIGKLRPRVEKITADLLDKLAED  
GKDGSPVDLVEEYCYPLPVTVICELVGIDEPRPHWRAWGDSMATMNGER  
IPTTLVKCIELARELIAKRRAEPODDLVTALVQAQAEQNRVSDDEIIGI  
LFSLVTAGHQTTTTYLIGNSVILLLENPDQLARLKENPSMWPQAVRELQRL  
GPIQFAQPRFPSEDIELGGVTIPRGAPVAPLLLAANTDPRRFPDPNKLI  
DRLAVGSEHGLGFGKGIHRCLGQHLAYQEAEEVALQGLFTRFPDLSLAVPR  
EEIPWILRPGFTRTRTLPLKLV

>CYP105G5 (2566059073) *Salinispora arenicola* CNS296

LTiETTETFPADDSLRAPLPRQFMQRDDPSKLPPALAALAEQSPVGRSTL  
PDGDPFWMVSGYDEARAVLSDPRFSSDRFRYHPRFKKLSGQLGERLRNDK  
ARAGSFINMDPPEHTRYRKLLTGQFTVRRMRQLTVRIEQIVTEQVDVMLA  
EGNSADLVSAFAVPVPSLMICELLGVRYEDRTEFQRRAGLLQTDLPKQ  
AVENLEAQRAFMQRLVTDKRRTPADDMISGLVHHAGAEPPLTDEELVGLA  
TLLLFLAGLDTTASMLGLGMFMLLQRPEQMAVLRDDPSRIGDAVEELLRYL  
TVVSTGLFRFAKEDVVLGDEHIPAGSTVVVSLMAANRDGRHWPEPETLDV  
TRVRSSHLAFGHGVHQCLGQQARIELTVGITELLRRLPNVRLAVPPADV  
PLRNDMITYGVHRLPILWDTF

>CYP1051A1 (2566059098) *Salinispora arenicola* CNS296

MATDAAITRARTVPAWKALPAAVRDTHRAFDVGNWSDGDVVRVSLGVSR  
PYLVTNPAHVQEVLHERAAIYPRGDDTALWRSVRKLVGDGILAEGDAAWAA  
SRRVLAPMFRPARINAMVDTMADAIAGAIDDLHGAATAGTPIDVGRELSR  
IVCSAIMRVFFADRITVRDALRIMKAQETIVTAMAPRILAPLVPWWIPMP  
GDRRFRAAVRSIDILLPVLQRQAQRQPDDGDDLLSRLVRARADDGRALSE  
KMRDDLVSMVAVTTTETSTVVLTWLWPLLANHPDVANRLYDEIDRVVGGG  
PVRGDHLAELTYTRMVLDELLRLYPAGWILPRRAATTDILGGVRINKGAT  
VILSPYVTQRMATAWWGPTAEAFDPERFAAGREAADGRHRYAYYPFGVGMH  
RCLGEHLFNLEAILIVATLLSRFRFALTDTSMPGVKVAASTRPARTVEMI  
LQPVAPVPAR

>CYP1005A1 (2566059348) *Salinispora arenicola* CNS296

VSAVLFRSWTKTAGTRWPDVTRVADQSGTEHLVVTRHALVRQVLTQATY  
RPDNAMEAVTPIPVAAALRVLAGHRFRLPPTLANNGGVSHPAIRALVADAL  
HPTKVAAQRPWLTGLVADRVASIRTTLDSSGGPVDLYADLTADLPLLVLAR  
LVELPDAPVNAVKQFARAALFELFWAPLDADCQLALADEVGRFHQVLRIFA  
DTGGGLAAALRATGHSPDVLVGALFFLLVAGQETTSQFLTLLHRLSGEP  
TIRAALRAGSSSVADVVEEGLRLEPPIVWRRVAAVDSTLGGTTVAAGTS  
VLLWLARAGRDPVVAAPDEFPRPGQSGRRHLAFGAGAHRCCLGDQLARME  
AAVVVEQATPLLDGVTVVRPPWYPDNLTFRMPDAFVVRR

>CYP105CT1 (2566059568) *Salinispora arenicola* CNS296

MNSPNHMPADRSLTAPTSGCPMALSRGRVGLDVADEISELRDGGRLGRIT  
TAFGQEATLITRYDEVRAQMADSVVFNVAGVSPPALVDGGFDTESVRRR  
RTVGNLIMLDPPEHTRLRRMVAAWFTTRRVERLRPRVVEIIDAALDEMER  
SGPPVDLVAMFAKTVPITVICELIGVPEELRERYRRRAERAVSASAVSTP  
LDELRLREAGWVSRELIEYHRENPSDDIIGMLLREHGTDSDHDDGITDDE

LVGLANALLIAGHETTTQMLSMGTLALLRHPDQLALLRDDPSIVAGAVEE  
LLRYVGV LHGGFVRVATRDTRLGGHRIHAGELVVPALTAANRDPRLTLDG  
DRLDITRPPTSHVAFGHGVHFCIGAPLARMELREAFPALLRRFSGLRLAV  
PDSELEFTQGT TVYSLRGLPVTW

>CYP154M5 (2566059585) *Salinispora arenicola* CNS296

VEQSCPYKLDVTGRDVHAEGEAIRARGPVAQVELPGGVQGSVTGYQAAR  
QVLADPRFAKDPKKWPAYTSGAIPPNWPLIGWLLMDNMTTNDGADHQRLR  
KLVSHGFTPRQVERTRPLIVKIVNDLLDGLSSAGPDEVVDLKGRFATPLP  
ARVICDMFGVPEALRASVLRGAQVNVNTSSISGEEAEANVEQWHRELLELV  
EAKREKPEDDMASLLIAAKEEDGSTLTQEEVVGT LHLMLGAGSETLMNAL  
SYAVLGMLS NPGQYEMVRNGTSSWDDVIEETLRAQAPVAQLPLRYATEDV  
AVGGAVIKAGDPVLMGFTAIGRDP AVHGETAGDYDITREDKTHLSFGHGV  
HFCLGAPLARLELKIALPALFERFPNM TLAVRPDQLEPQGT FIMNGHREL  
PVRLGQPATVLA

>CYP208A12 (2566059954) *Salinispora arenicola* CNS296

MTLDTITPRVPLGPPRTAALRMLLV MKRDR LGMLSSAAARYGDASRLPVG  
HKALWFFNHPRYAKHVLADNSANYHKGIGLVHARRALGDGLLTSEGD LWR  
KQRKVIQPAFQSRRIAQQAGMIAEEAFALVERLRARAGAGPVELTAE L TG  
LTGLV LGRSLLDADLAGFDSIGDSFATVQDQAMFELET LNAVPMWIPLPR  
QIRFRARRRKLQAVVD TLVDGRAGNLADRVDVLSRLILSARGEADPRVGR  
ERLRDELVTLLLAGHETTASTLGWTL SLIDRHPGVWERLHAEAVEVLGDR  
LPEYDDLRLRLRYTVMVVEEAMRLFPPVWLLPRRALAPDTIGEYRVPANAD  
VVISPYTLHRHPEFWPNPERFDPERFAPGQAADRPRYAYLPFGAGPRFCV  
GNNLGMMEAVFVIALLCRHLRLTGVPGYRLVPEPMLSLRIRGGGLPLVVRP  
VS

>CYP125A41 (2566060078) *Salinispora arenicola* CNS296

MTEPRIPAGFDFTDPEVLAHRVPREEFAELRR TAPVWWNAQPRGSAGFDD  
DGYWVVTRYADVMTVSRSDTYSTRENTAIARLRPD TTREDIEMQRVIML  
NVDPP EHTKLRAIVSRGFTPRAINALRGSLAERA EHV RDAAVRGVGFV  
SDVACELPLQAI AELIGVPQHHRKVF DWSNQLIGYDDPAYGTDPLTASA  
ELLAYAMEMA EERQ RSPSDDLVT KL VNAQIDGEHLTTDEF GFFVMLLAVA  
GNETTRNAITHGMVAFLDNPEQWELFKAERP KSAVEE IIRWATPVNVFQR  
TALVDTVLGGQAI SAGQ RVALFYGSANFDEAVFEDPERFDITRSPNPHLG  
FGGSGAHFCLGANLARLEIELIFNSIADHLPDIRKVAAPQRLRSGWINGI  
RQMPVRYR

>CYP244A4 (2566060370) *Salinispora arenicola* CNS296

MSTTTNTELTEAPETNMPVD PGLFDCMPDLIAAARVAPVVRIPYLGRHAW  
VVC DRELVKQAL THPKMGKDIALVPEWMRQPGLMVTAQPDPEYARAMIMS  
DGENHARIRRIHAPVLS PRNTERWGERVADKVEGF LDELSQAGSGGSTEV  
NVVTNYTHKIPLAFISEMLGLPPEAEHRLRGITDIMLYSSDYAARREAIG  
GLFGAVEDWVRNPADLRDGVITGLLAASDGPDAAVTEGEVIVWTLGMIIT  
GYETTGS LISTS LYEAI RPPHERPKTDEDITAWIEETLRVHPPFPHTW  
RFPLEDIELGGYLIPKGAPVQVSIAAANRKPGE GADSFDAERRGHGHL SF  
GLGMHYCIGAPLVRLEAQIAVRGFLRRFPQARLSAETAVQWESEWMIRRM  
SVLPAVLS

>CYP245A7 (2566060374) *Salinispora arenicola* CNS296

MPSATLPRFALTGWSRENIVNPYPVYQRYREVASVHRGESGGDAPDTFYV  
FSYDEVVQVLSSNCFGRGRSLDAAKASVPVPAEQKALRAIVENNWLVMFMDP  
PRHTELRSLLNRSFSPRIVTELRPRIARIAQELLSSRLGQQVDVDLVE SFA  
APLPILVISELLGIPEERRAWLRANALALQEASSSRAGRVDVGYAQAEVA  
AQEFTEYFREQVRLRRGRAGGDLITILANAQERGAPVSLDAIVGTCVHLL  
TAGHETTTNSLAKAVLALREHPAVLDELRGAEGLTTDAVEEFLRYDPPVQ  
AVTRWAHQDCTLGGCDIPRGSRVVALLGSANRDPARFPSPDVLDVRRPAD  
RHLSFGLGIHYCLGATLARAELEIGLQALLDGVPTLGYGTQHVDYADDLV  
FHGPSRLVLVNLGERCK

>CYP166A4 (2566060868) *Salinispora arenicola* CNS296

MTDAISFELPWARTDKFDPPAVFDALREQRPLARMRYPDGHVGVIVSSYE  
LVREVLGDPRFSHSCAVGHFPVTHQGQVIPTHPQIPGMFIHMDPPEHTRY  
RRLLTGEFTVRRTSRLTGHEGVATEQIEVMREHGAPADLVATFARPLVL  
RVLSGLVGLPYGERDRYLHAVTLLHDAEADPAEAAAAAYEQAGAYFDEVIE  
RRRRQPEDDLISTLVGDGELTGEELRNIVTLLLFAGYETTESALAVGMFA  
LLHHEDQLARLRADPTKIDAAIEELLRYLTVNQYHTYRTASEDIELHGEV  
INKGDSVTVSLPAANRDPARFACPAELDIDRETSGHVAFGFGIHCQLGQN  
LARVELRAGLSALLRAFPNLRRLAVPADEVPLRLQGSVFAVKNLPVCW

>CYP105CP2 (2566060956) *Salinispora arenicola* CNS296

MTKSMPVQDLPAFPIPRECYPYRPSAQHVSLRSGGPMKVRVLYNGRTAWLV  
TDSAHAARAVLSDYRRVSIKPYHGNYPLLNEEFEKVVDVSGYADVLFGVDPP  
EHTRQQRQMIMPSFTLRRATAVLRPDIQRIVDDKLDMMMRHGAPGDLVTEFA  
QPVPMSMVSFLLGVFWEDHEEFETPAHKLFVPELAEEATTELGAYLERLI  
QKKEQPGGTPGGTGLLDDLRDHLRAGALSRLDELVHIAMAMLVAGTDTT  
NVISLGLTALLDNPQWAALRDNPDDELIPGAVEEILRYTSLIEAFARVAV  
SDIELNGAVIKEGEGILISSAGVNFDPALAPDPGRFDIRRP RPSPFSFSH  
GIHRCPGDNLARLELEIAFRSLVTRMPNLRRTAKPIDQIPSNNDGTLQRL  
YELPVVW

>CYP105CN1 (2566060958) *Salinispora arenicola* CNS296

MAAPAPQATQSTTPHPPSYPLPRECYPYRPSAGTARLRDAGPVSTVRLYDG  
RTAWLVGTAAEARALLADSRVSNRADFPNYPVMDERHLSMRATREMAREE  
EGGFAAALFGMDPPEHTRQRLQLLPRFTVRQVAARRPAIQIRIVDEHLDAM  
EANGSPADLVSAFATPVPTMVVCTHLGVVPYQDRTRFEPVAVAGLFEPDRAD  
AAMAELTAYLHQLIETKQSEPGDGVIDHLIANHLRPDAIDRAELVAIASA  
ILVAGTVTTSSAIALGTLALLTAPGQYAALVDNPDLPVPGAVNEILRYLSL  
VEQLARVATEDIEIGGKLIRAGDGIIVSFAAGNLDPNVTTHPDRLDVALP  
PTNHLAFVSHGIHHCIGQNLALLELDIAFRALVSRFPTLRLAVPAEQLP  
TYFAGDVPRLACLPTW

>CYP107FS2 (2566060959) *Salinispora arenicola* CNS296

MPVPQGEQNLTTTEVFADPKALFATLGSRQPLHRISLPDGMFAVLVTGNRE  
ARQALSDPRLVRSITAAAPELHKYHPLASDDYALSRHMLFADPPDHGRMR  
KLVSTAFTRRRVEQMRPIQQITDDLIDVIAAKGEADLVETLALPLPIAV  
ISEMLGVFPFADRSEFERHAEVLTGINASSGFDALIAAGRWFDEYLAELVQ  
QRRREPQDDLISGMLAAQDKGDRITDVELRSNALLLSAGFETT VNLVAN  
GLLALLRHPEAMAALRSEPNLMTTAVDELRLRYDSPVSCVTYHFAQEPVEI  
GGFEIRSGEHVVIAAAANHDPTVFADPSRLDLRREGSGQILSFSGIHF  
CLGAPLARLEGEIAFGTVLRLRAGLRLAVPTDSLWVKASFVLRHRLERLPV  
TFTPDRAFPNIDSVHTV

>CYP248A2 (2566061019) *Salinispora arenicola* CNS296

VLADAVTAFDPTAVDVRRDPYPSYHWLLRHDPVHRGAHQVWYVSRFADVR  
AVLGDERFARTGIRRFWTDLVGPGLLSQIVGDIILFQDEPDHGRLRGVVG  
PAFSPSALRRLEPTIEATINDLLRPARALGAMDVVADLAYPLALRAVLEL  
LGLPAGDANAVGRWSRAVGRTLDRGATAEDMRRGHAAIAEFADYVERALA  
ERREDGADLLALMLAAHRSQMSRNEIVSTVVTFIFTGHETVASQLGNGL  
LSLLDHPEQLELMRRQPHLVPQAVEECLRFDPVQSNTRQLAADVELHGR  
RLRRDDVVVVLAGAANRDPGRYDRPDELDIRRDVPVPSMSFGAGMRYCLGS  
YLARLQLRTALGAMVALPDLRLVCSPNELAYQPRMTMFRGLTRLPVAFTPA  
G

>CYP105W2 (2566061027) *Salinispora arenicola* CNS296

MTGYQDRPTGDQPGAPVPSGSTDPGIGAFPLPRRCPFSPPAEYARLRAEH  
PVVRLPMLGGDTAWVVSRAHADVRLSDPRMSADRRRPGFPKFAPTTEGQ  
RQASFANFRPPLNWLDPPEHAICRRQIVDEFVRRVRQSRALVERVVDTH  
LDALTAAPGADLVSTFAYPVPSQVICEVLGVYPYGEHEFFERRSTLMFRR  
STPADERARCAIREIRDFLDVVTDKERRPGDDVLSRLLYRQRSAGGMDHE  
AVVSMAFVLLVAGHVTTSNMLALSVLALLTHPARLARLRAEPPERFPAAVE  
ELLRYFTVVEAATARTTTAEVTIGGVTTAAGEGVVALGQAANRDPVFEH  
PDEFDPDRDARAHLAFGHGRHICPGQHLARLEMEVALSRLFRRLPGLRLT  
MEVSDLPLKEDSNIFGLYALPVAW

>CYP105AB8 (2566061536) *Salinispora arenicola* CNS296

MTETASSRLTDTTEFPVQRECPFAEPVEYEQIREQSSIAMVRLTGGEAWW  
ISGHEQGRAVLADRRFSSDRKANFPFVSTDPAIRKRLHAQPLSLISMDG  
AEHTQARRALIGEFTVRRLAALRPRIQQIVDQCIDEMLTDDQHRADLVKT  
LSLPVPVSLVICELLGVYPYADHDFQEHATLVRRNTASEVRQHSIDELNA  
YLGALIDRKLASPDLLGRQIARQHRDGTFRSSMVSLAFLLLVAGHET  
TANMISLGVVGLLQHPEQLAMIKDDPKTPLAIEELLRFFTIVDSVTSRV  
ATEDVRFGDDTTINAGDGVVVSGLSADWDPTVFADPDRLDLERGARHHLAF  
GFGPHQCLGQNLARLELQIVFDTLFRHRIPTLRLAAPLDKIPFKTDAAIYG  
ARELPVAW

>CYP211C1 (2566061659) *Salinispora arenicola* CNS296

VVDVEELLTRLYSAQGRQDPFPVYADLHAQGPIAALPPEPERRRVA AVAV  
GYDLVGAVLRDPEWSKAPPPGWTEQEILRTLQTSMMFINPPDHGRMRHVF  
AGTFTPRRLGALEPVVNRVADELDRMADAGAGGLDFVAEFAYPLPARVM  
AEFIGIPETELDWYRERVDVIDAFLDVAGKTPQRLAAANAAGAE LRAFYG  
ELLARRRRTPGEDLISGLVEAVDAGGVELTEDELVSNLIVLFNASFVTTV  
YMLSNGLPVLLAHPEVAAALATDPVLTAGAVDEMLRLQAPVHLLARAAPR  
DTVLGGVPPIPGQNVLLLI AAANRDP AHFPDPDRFDPWRSGPPSLAFGLG  
LHYCLGAAVSRLEGRALALPRLLSRFPRLRIMEQPVYSGSLFLRGIDKLSV  
SPGEGSTRE

>CYP247A7 (2566061833) *Salinispora arenicola* CNS296

VRLTPGAARDIDLDSVNLFDLDLYTSGDPHPIWDMRAQSPLHHQVLADG  
REFWSVTRYDDVCRVLGDYREFTSERGTVVTHLGEDDIAAGKLLTSTDPP  
RHTQVRRRAIGAKLTARAVASWQDRIRDAIVRFLEPALDGDTFDLAEQALL  
LPAIVTGPLLGI PERDWQELVQLTAMVTAPSDPHFQHGSEAATLAISHHE

LVTYVTEWVKQRRSAGGGDGSLLDHLMSVRVGGAPLTDEEIALDGYSILL  
GANVTTPTHTVSGTVLALIERPEQFEKAQADPSLLANLVEEGLRWASAACN  
FMRVAVNDTRIGGGTVPAGGAVVAWIGSANRDESYFPDPHQFDITRSGAN  
RQVAFGFGPHYCIGAPLARMTLGIFFFEELVQRFSGSIELAGEPQHLSYFI  
AGMTHLPIVAQKRKTP

>CYP211B2 (2566062180) *Salinispora arenicola* CNS296

MDVSEAI AVLISPSGRLDPYPTYEQ LRAHG PVSRTTAGL FVVTGYAEADM  
VLRDPRFVVLDDDLRDDVFPHWQDSPAIKSIARSMLRTNPPDHSRIRRLA  
AGAFTPRRVAAMREVVTAQADELVDEMIRAGRDGARVDFMDMFAYPLPVA  
VICALLGVPAADRSRFRRWAGDLTGILEPEITPEELAGADAGADELRDYF  
TGLIEQRRRAPADDLTALVQAHDADGDRLSGEELLANLVLLVAGFETT  
TNLLGNGLVLLTRPEAAAAALRDEPD LAPGYVDELLRYDSPVQLTTRTVR  
ESVSFAGTELPADSWLLVLLGAANRDPRRFPDPARFDPGRAQSQPLSFGA  
GPHYCLGAGLARLEAQVAFPLLLRRLPELALAGRPSRRTRLTLRGYETLP  
ITVGAVTADRGTAGVAPGTP

>CYP107EU1 (2566062569) *Salinispora arenicola* CNS296

VTIGQTL PDLVYSPEFTRDPYAIFARLREQAPVCRVTTHRGMSAWMVTRH  
ADVRALLADNRLAKDGNRIGELMPRHSTLTGAATGFPFGLTTNMVNSDPP  
DHTRLRHLVGREFTGHRVEGLRPRIEEIVDDLLDGVAACGDEADLAETLA  
RRLPIAVIGELLGVPEADRAEFFRWADTLYGGTASPEALGQAYNAIVDYL  
GRLCDAKRDPADDLLTALVQVSADEDRLSREELVSMALLLVAGHETTS  
KQISNGVLALLLNPEQLKLLKAQPARTAGAVEELLRFEGPSLSASLRFTT  
EPVEVAGVVIPEGEFVLLSLASGNRDPEKFDPDRDLITRSTQGNLAMGH  
GIHHCVGAALARLELEIVLSRLVARFPQMQLAVEADDLEWL VNSFFRAPL  
HLPVSLRR

>CYP105J3 (2566062867) *Salinispora arenicola* CNS296

MTDSVAFPQGRVCPHQ PAPGYRPLAVQRPLAQLTLYDGRRVWAVTTRDLA  
RRLLVDPRISSDRTNPAWPAIVPIVAAAVNDAQQKVLKIATALVGTGPE  
HKAQRKMLIPSFTRFRMNALRPMIQEIVDQQLEMIKSGAPTDLIPAFAS  
AVPVTVLYRLMGIPDDDHGFFFEKLSHQLLAGPNANEAYDQLMGYMSRLIA  
ERRRNPGEGLVDDLLAQHGANDDADHDELVSTLVVQVAGNHGTTGSMIAL  
GLFALLQHPEQLAELRADPSLMPTAVDELLRFLSVPAVTRSAADDIEVE  
GTIIRKGDGVFFITSLINRDTDVHDAPNSLGWHHASAADHLTFGFGAHQC  
LGQSLARITMEIALGALIDRLPSRLRLAVPAEEVPFLPAASLQVIAELPIT  
W

>CYP1198B1 (2566062920) *Salinispora arenicola* CNS296

MSGELTDQRTAPGAGGNPLRSLMDHGIRANPYPLFGELREAGPTAVEDGS  
VVLFGHEYEHCSQILRHRDMGSDTSEAPSIKGFVVDDAERAGSSIFFMDQP  
GHGRQRKLVKSFTPRIVKSFGPQITHIVDGLFEDFRDKGELDVVTDLAY  
PVSIGIICDLFGIPDDERDMLKEWSDDLALSTELPTLGAAIGVLNVFTRD  
EINRFGSVMAAHAYFADLIHRRRKNPGDDLVSLLATESNGERLTRFEV  
TSVLATLFVAAHESTTNLISGGILALLRNQDQMAVLRENPGELITNVVDES  
LRYDPPVHLAARMARARTTIGGYDLDPGTIVVVLMAAGNRDPRAYENPDV  
FDVNRKIRNVSLAFGAGAHFCIGSGLAKLEAEIAISAFQRLKHPEVDES  
SLEYRRHIVVRGLEHMKVSFQP

>CYP105AH4 (2517455912) *Salinispora pacifica* DSM 45549

MTLLQAE EKVL TWPFARTEWGT PPPILAQLRQAPPCAVII PAGAASERRA  
WLVT RYPDVRQALMDPRLSADELLPGAPVRIQVPQEERPSSFLRMDDPEH  
GRLRGMIASQFTARRVRQLVPAVQRRTDLLDAFVAGPCPADLHDAFSRK



LPTLVIASLLGVPDEDSAFFVEKTRVTLSDQDDPEVSFAAYREMTDYLGLQL  
AARKAKEPQDDLMSQLAVNNLAVGDITMDELVGIARLVLVAGHETTTNQI  
ALNILSLLLDPLRAQVLADDGRLLPEYIEEAMRYWSISQDGIVRLVTE  
LVLGEVQMRAQDAVVISIPAANHDPTVFPEPNRIDVTRSPRDHLQWNGP  
HYCQGAPLARLEMVIALRTLFLARLPGLRLATDDVPSLFRRGTVFHGVENL  
PVAW

>CYP245A13 (2517456708) *Salinispora pacifica* DSM 45549

MPSATLPRFTLTGWAREDIINPYPVYQRYREAAAVHRGEASGDAPETFYV  
FSYDEVAQVLSSNCFGRGRSLDAAAAAVPVPTDQKALRAIVENWLVFMDP  
PRHTELRLALLNRSFSPRIVTGLRPRIARIAQELLTRLGQQVETDLVAGFA  
APLPILVIAELLGIPAERHGWLRANAMALQEASSSRARRDVG YARAESA  
AQEFTEYFREQVYLRRGSTGDDLMTILANAQLRGAPVGLEAVVGTVCVHLL  
TAGHETTTNSLAKAVLALRAHPAVLEELRSADGLTADSIAEFLRYDPPVQ  
AVTRWTHQD TTLGDWEVPRGSRVVALLG SANRDPARFPLPDALDVRRTAD  
RHLGFGLGIHYCLGATLARAELEIGLQTL DGLPALDYSVQYVDYADDMV  
FHGPSRLLLLVNPGERFCS

>CYP244A5 (2517456712) *Salinispora pacifica* DSM 45549

MSVTTNAELGEAPETNMPVDPGLFDCLPDLIAAARIAPVVRIPYLGRHAW  
VVCDELVRQALTHPKMGKDITLVPEWMRQPGMLVTAQPPPEYARAMIMS  
DGENHARIRRIHAPVLSRPNTERWGEQVADKVEGFLDELGQAASGGNAEV  
DVVTNYTHKIPLAFISEMLGLPPEAEHRLRSITDIMLYSSDYAARREAIG  
GLFGAVEEWVRDPAGLRDGVITGLLAASDGPGA AVTEGEVIVWTLGMIIT  
GYETTGSLISTSLYEALRRPPHERPKTDEDIAAWIEETLRVHPPFPHTW  
RFPLEDIELGGYLI PKGAPVQVSIAAANRKPDEGADSFDAERRGHGHL SF  
GLGMHYCIGAPLVRLEAKIAVRGFLRRFP RARLSADTAVQWESEWMIRRM  
SLLPAVLS

>CYP113E2 (2517456885) *Salinispora pacifica* DSM 45549

MAAVPRLTFADGGKRVLPWFRMRDDQPVWYDQGTKSWNVFRYADIAQIL  
KDPVTFSSDPGRSMPELAEAEAGSLVAVDPPRHTRLRGLISAAFTPRLV  
EQLAPRVRSIGELLNRA FVDRRVEGEFDIIGDLAYLLPVYVIGELLGLP  
ESDRGYLVRAADEFYAI SADDPF DGAYMASMQSTLDELGSYMLDHAERRR  
AKPGDDLISALAHAEIDGERLNDREIRNF AILLTLAGHITTTALLGNTLL  
ALGERQDIMLRWRQGQVDTAILLEEVL RHRTPFTEVYRFTTTEVTIGNQV  
VPGDQLRLRWIASGNRDERQFADPDTFVLGRDSKHLGFGGLGIHYCLGASL  
ARMESVVVLGLLAERTTSLAPAVEALSYYDAPGIFCLRSLPVSYRRT

>CYP211B18 (2517457068) *Salinispora pacifica* DSM 45549

MDASEAVALLMSPGRLDPYPTYEQ LRAHGFPVPTAAGFFVVTGYTEADT  
VLRNPRFGVMDDEERADVFPHWQDSPAMMSISRSMIRANPPDHSRMRLA  
AGVFTPRRVAALREVVAQADELIDEMTRAGRGGAPVDFMG SFAYPLPVT  
VICALLGVPAADWAQFRRWASELTGVLEPEITPEELAVADAGASGLRDYF  
TELIAERRRTPAEDLT TALVQAHDADGDRLSGEELLANLVLLL VAGFETT  
TNLLGNGLVLLNQPGSATALRDQPELAPRYVDELLRYDSPVQLTTRTVR  
ESMPLAGVELPAGSWLLVLLGAANRDPARFTD PARFDPGRAQSPPLSFGA  
GAHYCLGAGLARLEAQVAFPLLLRRLPELALAGEPTRRNRLTLRGYETLP  
VTVG AAPADHGT PAGAALGTP

>CYP1005A6 (2517457395) *Salinispora pacifica* DSM 45549

MSAVLFRSWTKTAGTHWPAVTRVADQQGTEHLVVTEHALVRQVLT DQVTY  
RPDNALDAVTPI PVAALRVLTGHRFRLPPTLANNGGVSHPAIRALVADAL  
HPAKVAAQR PWTGLVAERVAAIRATLD SGG SADLHAELSADLPLLVLAR

LVELPDAPVSAVKQFARAALFWAPLDAGRQLALADEVGRFHQVIREFA  
DTGGGLAAALRATGHPPDVLVVGALFFLLVAGQETTSQFLTLHRLAGEP  
TVRAALRDGSVSVTNVVEEGLRLEPPIVWRRVAVDSTLGGTAVPAGTS  
VLLWLARAGRDP AIVPAPDEF RFGQ RGSRRHLAFGAGAHRC LGDQLARME  
AAVVVEQVTPLLDGITVVRAPWYPDNLTFRMPDAFVIRR

>CYP105AB24 (2517457638) *Salinispora pacifica* DSM 45549

MPETASITTTGTASTATTGAASGKVTDAEFFVARGCPFFSTPAEYEQIREH  
SPIAKVRLTTGREAWWIAGHELGRTVLADRRFSSDRRRDNFFVSTDPET  
RKQLQDQPTSM LGMDGA EHAQT RRALMG EFTVRRMAGLRPRIQQIVDQHI  
DEMLSSEQRSADLVEALS LPVP SLVICELLGV PYADH DFFQGLTG PLLRH  
TTPPEAR GRIQEELNTYLGTLIDRKLT DPTDDLLGRQIAKQHAAGTFDRT  
SLVSM AFLLLIAGHETTANMISLG VVGLLQHPDQLAMIKNDPEKTPPAVE  
ELLRYFTIADTVTARVATEDVQLGDTTINAGDG VVISGLAADHDPTVFTD  
PDRIDLERGARHHVAFGFGPHQCIGQTLARMELQIVFDTLFRRIPTLRRLA  
APLDDIPFKSDAFVYGA EKLPVAW

>CYP107NH1 (2517458341) *Salinispora pacifica* DSM 45549

MTEPVVSLMDPEFWNDPVSAYERLRGSGPLIRMGLPGVPPVWLVTSCHEV  
KSALSDPRFVVD AANVPGHHGPGIVDQ MMAASGMPDEF RDYMTNMMFTDG  
KDHSRLRLVTPGFSARRIRAMRPRVDQIAGELVESLAEKSGGELIADFS  
APLTTT VICELIGVDRADQAQMGAWMRDYTTGERVVSGRAMVNYTRDLIE  
RRRAEPADDMISAMIRSGDEAGDRLSDAEIIAMALLLINAGHHSTAQFIP  
NAVLVLLDHPEQLARLRAEPGQLPGAMDELMRLANPVPIATPRYATEDME  
FAGVAVRRGEALTGSLEAANFDPERFFAPRQLDTGRDLGRGDGHLSFGAG  
PHYCPGAALARLEGEIALDHLLLRDSLRLAVERDEVYDVVSLGLRMLS  
SLPVRL

>CYP247A8 (2517458347) *Salinispora pacifica* DSM 45549

MRLTPEAGRPVALGSIDLFDPDLLASGDPHSVWDVMRSEAPLHRQVLPDG  
RVFWSVTRYEDVCRVLGDHRAFTSERGT VFTQLGADDIAAGKLLTSTDPP  
RHTEVRRRAIGGRLTARAVAHWQDLVRRAVVRFLEPALDGGCWDLAERAQQ  
LPLIIAGSLLGIPESDWEKLVQLTGMVTAPSDPMFGLGSEATLAI AHHE  
IFDYLSDLVRRRRSAGTGGDSLLDHLMTVRAGAGPLPDEEVVYDSYSLIL  
GANATTPHTLSGIVLTLVEWPEQC DKVRADPSLIPSMVEEGLRWTS AACN  
FMRYATVDTRLTGGTVPAGEAVVAWIASANRDESQFTDPHTFDVTRGENR  
HVAFGFGPHYCIGAPLARM TARIFFEELFRLFWSIEIDGEPQH LRSNFIA  
GMTHLPVVTRKRAQV

>CYP107Z27 (2517458357) *Salinispora pacifica* DSM 45549

MSRTLPCHS LMDPTLIDDPAGGFSRIRDESPLAHAMVPGVDGPVWL VTRH  
ESVRKVLGDRRFVNDPTNVP GSSTPDLWAHAALAQGV PHEYLEHVRSMLQ  
LDGEVHARLRRLVSRAFTMR RITALRPRMMQLTEELLDLLPAKAEDGVVD  
LVEHFNYVQPI SVICALVGVPAAADRAAWIRWSRVLTSMESGTIGDAVTGM  
VDNIRALIEQRRAEAA DDLTDLVRVRDADGDRLSEREMITLVITLV TAG  
HDSTGLLLSNGLAALLTHPDQLAKLRADPSLGPQAFDELMRWCSAIVAAR  
PRYATEDVELEDGLVRRGDAVIPVLVSANYDPEVFEDPHRLDITRVHEQR  
RFHHVGF GDGLHYCLGAALAKHEAAIAITALLERYPGLELAVPAQRLRRA  
RLPLTWRLDSL PVRLGIGG

>CYP107AY6 (2517459214) *Salinispora pacifica* DSM 45549

MRAELAPIPRSGVRLGQEYDEF RKTGDVHQVLLPDSSLAWLVTDP ELVSR  
ALADPRLALNRRHSRGW SGFALPPALDANLLNLDAPDHTRLRRLVGP AF

SPQ RVAALRPRI RRTAEHL LDALVTAGGPVDLVTGYCTPLSVQVIADLMG  
VPEGGR TD LRTWTD TMLTSYPPDRAAIRRTVVELHG YVVNLIAAKQQQPG  
DDL LSALVTIEQDGDRLTRDEL TSLAFLILFAGYENTANLIAS TVLRLLD  
RGGIREARILEAIEETLRLEPPAPVAVRRFPTEEMAIGGATIPAGDTVLL  
SIAAATRGVDGSATRLAFNGPHFCLGAALARVEAE EALTVLGRRLPGLA  
LAVPVAQVRWRPTFRTHGPAELLVTW

> CYP244A9 (2517459227) *Salinispora pacifica* DSM 45549

MQNTAHTNLAEAPEVTMPIELRPTDCLPELLAAARVAPVVRIPYLDQHAW  
VVC DREL VKQAL THPKLGKDVTLAPDWMRQPGQMVTAI PPPEYARMMVMS  
DGEHHARIRRIHAPVLSPRNAERWSE RVAALVDGFLDNLDSTAGAQVDLI  
TDYTHKIPLAFTSEMLGLPPGAERRLHDITEVMLYSADYALRQQAVGELF  
EAVQEWVRNPAGLREGVITGLLASSDGP DATVTEGEAIVWTL SLIINGYE  
TTGSLISAALYEALRRPARERPHTDEAIAAWIEETLRVQPPVPHTTWRF A  
LADLDLGGYLIPKGAPVQISLAAANLDPDEDADSF DARRRGRGHLSFGRG  
AHYCIGAPLARVQTKIALRGFLRRFPQARLSADTAPQWESEWMIRMSVL  
PVLLA

>CYP107NG1 (2517459604) *Salinispora pacifica* DSM 45549

MTIPAGHSAAVCDFPVVQPDRLAVEPLFADLR SRTPIVRVRLPFGGTAWL  
LTRYRDIRAVLASAQCCRAATDPDTPRILPRAGGEGLLMSLDAPEHTRL  
RGLVTAWFTTRRVESLRPATEQAARQLIADMRGTGRADLVEQFSQKLSAT  
VIGDLLGVPRSDRET FQRWSEALLSSTSYTQTQVQQATAELNNYFGYLID  
QRDSHP SDDL VGTLVRNMQAGKLSRREVLALVTDLLVAGFETTAGQLTNS  
VYTLSTIPGAWAWLAADRTRIPA AVEELLRALPLGAGGFRARVTTAPITL  
GGDTRPTTIPAGHVIIAPTIAANTDPEAFDEPLTIRLDRPRNQHLAFGH  
GAHRC LGAPLARMELTTALDELIEAFPSLT LAAPETDLQWKSGLQIRGPR  
ALPVTW

>CYP154M18 (2517459672) *Salinispora pacifica* DSM 45549

MHETCPVLDTAGRDIHGESDRLRQRGA AVKVKLPGGVLA WAVTGHSAIKK  
VLLDPNVTKNARAHWPAFINGEIPMDWELISWVAMDNMVTAYGAHLLQLR  
KLSAKAFTPHRVEMMRPRVVALVNQLLDDL TAGGDEVVDLRERFCYPLPA  
LTVADLIGMSEEHRQQTAKAMDMVDTTVT PAQAQETLAGWRGAMAELIA  
EKRRNP GEDIASDLIAARD DENGAKLTDTELTDTIFAILGAGSETTINFI  
DNAVTALLSHPDQLAMVRSGQISWAEVIEETLRVECP LGSPLRYAVTDI  
ELEGVTIPKGDPILVNYAAAGRDPALHGETAGQFDVTRPDKEHISFGRGP  
HYCLGAGIARMVATVGLSTL FERFPDLALAVPKGELQPLPTFIMNGHRAL  
PVRLGVHRRRAVAG

>CYP208A28 (2517459698) *Salinispora pacifica* DSM 45549

MTVIADRGGRVPPGPPVTAGLRLL LALGRDRLGMMTSAASEYGDVARLPV  
GPKRLYFFNHPDHAKHVLADNNANYQKGIGLVHARRALGDGLLTS DGELW  
RKQRRVIQPAFLNRRLAQYAGVVGQEATRLAERLATRV DGPPVDVLDEMT  
RLTLGVLGRTL LLD AELTGFRGVGESFAAVQDQAMFELETLSAVPTWIPLR  
RQRRFRARRRHLQEVVDVLA AERGQEV EGRDDVLSRLILSTRAEADPQLG  
RQRLRDELVTLLLAGHETTASTLGWSLHLLDQHPRLRERVRHEATSVLGG  
RVPVYEDLHQ LRYTAMVVQETIRLYPPVWILTRRARADDEVGGYRVPAGA  
DLLICPYTLHRHPRFWEEPERFDPERFDPAGLTNRPRYAYIPFGAGPRFC  
VGTNLGMLEATLVLA VLLRDLRLLEGLPGRAVTPEPMLSLRVRGGLPMTVR  
RAD

>CYP125A15 (2517459788) *Salinispora pacifica* DSM 45549

MTEPRIPVGFDFTDPAVLERRVPREEFAELRR TAPVWWNVQPRGSAGFDD

DGYWVVTRYADVMAVSRDSEYTYSTRENTAIARFQPGTTRADLEMQRVIML  
NVDPPPEHTKLRAIVSRGFTPRAINALRGSLAERAERIVRDAAVRGTGDFV  
TDVACELPLQAI AELIGVPQHRRKVFWDWSNQLIGYDDPTYGVDPLTAAA  
ELLAYAMEMADERQRNPSSDDLVTCLVNAQIDGHELTDEFGFFVMLLAVA  
GNETTRNAITHGMLAFLEHPEQWELFKAERPRSAVEEIIIRWATPVNVFQR  
TALVDTTLGGQAI SAGQRVALFYGSANFDES VFEEPD RFDITRSPNPHLG  
FGGSGAHFCLGANLARLEIELIFNSIADHMPDIRKAAEPQRLRSGWINGI  
REMPVRYR

>CYP211C8 (2517459912) *Salinispora pacifica* DSM 45549

MLDVEGLLARLYSAQGRQEPYPVYADLHAQGAIAALASRPERQ RVAAVAV  
GYDLVASVLRDPEWFKQPPPDWTEQEILRTLQSSMMFINPPDHGRMRHVF  
AGTFTPRRLGALEPVISRVTD ELLDRMADAGPGEVDFVAEFAYPLPARVM  
AEFIGIPAAELAWYRERVDRIDAFLDVAGKTPERLAAANVAGAE LRAFYG  
ELLAHRRRTPEGDLISGLVQAVDSGGVELTEDELISNLIVLFNASFVTTV  
YLLSNGLPVLLAHPEVAAAMADDP ELAAGAVDEILRLQTPVHLLARAAPR  
DTVLGGVSIPQGSVLLLI AAANRDP AHFPDPDRFDPRRSGPPSLAFGLG  
LHYCLGA AVSRLEGR LALPRLLSRFPRLRILEQPVYSGSLFLRGIDKLSV  
SPGGREHP

>CYP105AB28 (2517984974) *Salinispora pacifica* CNT851

MTETASTTTPGISSTTTSGPASGEVTD AEFPLERGCPFSTPTEYEQIREH  
SPLAKVRLTTGREAWWIAGHELGRAVLADRRFSSDRRRDNFFVSTD PET  
RKQLQDQPTSMIGMDGA EHAQARRALMG EFTVRRMAGLRPRIQQIVDQHI  
DEMLSSDQRTADLVEALS LPVPSLVICELLGV PYADHDFQARSGLPIRH  
TTPTEVRLRIQKELNTYLGALIDRKVTDPTDDL SRQIAKHHAAGTFDRT  
SLVSM AFLLLIAGHETTANMISLG VVGLLQHPDQLAMIKEDPEKTAPAVE  
ELLRYFTIADTVTARVATEDVQLGGTTINAGDGVVISGLAADHDPTVFTD  
PDRDL LERGARHHVAFGFGPHQCIGQTLARMELQIVFDTLFRRIPTLR LA  
APLDDIPFKSDAFVYGAERLPVAW

>CYP107FH3 (2517985263) *Salinispora pacifica* CNT851

VPIELDEAFVQDPYAVYEKLRAEGPAHRVRMPPGVPLIGGLPVWLITGYD  
AVRAALADSRLSTD LRRIDGLFAQKDPDRSHRGGFSSALASHMMHTDPPD  
HTRLRKLVS KAFTTRAIEALRPRIQQTTDELTAEMAGHDTVDLLDAFAFP  
LPIRVICLLLGV PVAEQENFRSWSRALVSGHSPEAAATAATEVAAYLGDL  
VERKRHATTDDVLTALVA AHDVDDRLTHTELVSTAYLLFIAGFETTLNAL  
NGT LHLMLHRDQWTALRADRALLDNAVEEFRLRESPLKHATFRCATESL  
RIGDAEIAAGDFVLLAIASANRDP RRFDPHTLDVRRPAAGHLAFGHGHIH  
HCLGAPLARVEVRMAFDALLDAFPDMRLATDPAGLRWRNSTIIRGLDSL P  
VHLNN

>CYP2054A3 (2517985267) *Salinispora pacifica* CNT851

MSISADSEQVQGRFPDPYGAHRDDPYTFLAGLGVFYAPLLDAWCVT RRED  
MVAVLRDDRSFSARDHNPRPAVALPDDVNQMFR TWRGAGAVAVGSLDPPA  
HAKIRDVLNLGFTPARVRAFEPTMRAVATDLADRIGDAPEFDFIADFAVP  
FALEVIGRRLGV PDDYLDRCRTWSEQRIELMMAQGDADHDRLREFARGLM  
EFGEFARSLVRDRVADPRDDLISELLHDGKAGRTLTADEVAVQIPTLI FA  
GHMTCAEALGTIFYQQLRSPGGWARVVDRTIPVGD LVEEGLRFDSPLAGM  
YRTATRDVTVGGIRLTAGSRLLLLYGAAGRDSRAHACPAAFRPGDGSSGH  
LAFGHGHIHFCLGAGFARAELRVAVEVLAARMPDLGLAPGRPPRFRPVFPL  
RALTEL RVTRSGGGSGP

>CYP161N4 (2517985273) *Salinispora pacifica* CNT851

VNTVAQLPFTQTHVLVDVAPALRLLQSRGKVHRVRTPEGVPAWLVTGHAEV  
QQLLDDDRLSRSDPGGRDGGTALLNKLLGPLADDDHPRLRSLLEPQFTPER  
LKPLRAVVEKLTEQHLDELATRTPPVDLR PALAMSLPILVLCEWLGVP AE  
DKGRFSVWTQDAAGVQDPERSQRGLAELFGYCRQLVAAKRQDPGDDVISR  
LIATAGIGDTEAVALTALLLFGGYETTVARIGTGVL LLLLTNPDQWAAVRA  
DPALVPATVDELLRRSMPNPNHNGGMPRFAVTGFEIDGAAIRAGDLVLLNI  
IAANHDETAFPDPDRLDITRPTAGSLAFGHGRHSCVGAPLARMVLRVVL S  
RLITRLPDLRLAVGVDELKLRHETLVGGLVELPVTWGPR

>CYP107AW7 (2517985556) *Salinispora pacifica* CNT851

VETVTGTSTPPPVPIADPYPTLARIRANGPVSILHSDEGIPMWVIARYR  
DVRAALADPRFGQDARRAQALADNRVAGVALGGDIVHMLNSDPPDHTRLR  
RHHVQRAFTARRVAAMRPLVERITTSLLDGLTGRTTVDLVQDFAFPLPLV  
ICELLGFP AEERNAYRSWSTAILTHDDDPAAFATALREMTDYIAVQLRIR  
QTRPGDDILTELLAARDAGQLTDEIIGMVFLLLIGGHETTVNLLGTATL  
ALMRNPDQHQLLANQHALPEAIDEFLRYESPVAMATLRFTTTPVAVDDV  
VIPAGELVLVSLGGANRDPDRFPDADRLILDRDGTGHLAFGHGLHRC LGA  
FLGKLEGEVALGALLRRHPRLALAAEVRQLRWRDTIMLRGLES LPSVLHG

>CYP211B11 (2517985899) *Salinispora pacifica* CNT851

MDASEAVALLTSPFGRLDPYPTYERLRAHGPVVSTAPGFFVVTGYTEADT  
VLRNPRFEVMEDEERDGVFPHWQDSPAMISISRSMIRANPPDHSRMRR LA  
AGVFTPRRVAALREVVAQAADGLVDEMIRAGRGA AVDFMG SFAYPLPVT  
VICALLGVPTADWARFRHWASDLTG VLEPEITPQELAIADAGASELRDYF  
TELIAQRRRAPADDLTALVQAHDADGDRLSGEELLANLVLLLVAGFETT  
TNLLGNGLVVL LTHPDSATALRGQPELAPGYVEEFLRYDSPVQLTSRTVR  
ESVSLAGVELPAGSWLLVLLGAANRDPARFTDPARFDPRAQSPPLSFGA  
GAHYCLGAGLARLEAQVAFPLLLRRLPELALAGEPTRRHRLTLRGYETLP  
VTVGAVPADPGTPAGVALGTP

>CYP125A65 (2517986732) *Salinispora pacifica* CNT851

MTEPRIPVGFDFTDPAVLEHRVPREEFAELRRTAPVWWNVQPRGSAGFDD  
DGYWVVTRYADVMAVSRDSETYSTRENTAIARFQPGTTQADREMQRVIMI  
NVDPP EHTKLRAIVSRGFTPRAINALRGSLAERAERIVRDAAVRGTGDFV  
TDVACELPLQAI AELIGVPQHHRKVFWDWSNQLIGYDDPAYGVDPMAAAA  
ELLAYAMEMANERQNRNSDDLVTKL VNAQIDGEHLTDEFGFFVM LLA  
VAGNETTRNAITHGMLAFLEHPDQWELFKAERPRSAVEEII RWATPVNVFQR  
TALVDTTLGGAITAGQRVALFYGSANFDES VFEEPERFDITRSPNPHLG  
FGGSGVHFCLGANLARLEIELIFNSIADHMPDIRKVADPQRLRSGWINGI  
REMPVRYR

>CYP208A22 (2517987587) *Salinispora pacifica* CNT851

MTVIADRGGRI PPGPPV TAGLRLLLALGRDRLGMMTSAAA EYGDVARLPV  
GPKKLYFFNHPDHAKHVLADNHANYQKGIGLVHARRALGDGLLTSEGELW  
RKQRRVIQPAFQNRRLAQYAGAVGQEATRLVARLATRV DGPPVDVLDEMT  
RLTLGVLGR TLLDAELTG FHG VGESFAAVQDQAMFELET LNTVPTWIPLR  
RQRRFRRARQHLQE VVDVLA AERGQAVEGRDDVLSRLILSTRAEADPQLG  
RERLRDELVTLLLAGHETTASTLGWSLHLLDQHPELRERVRHEARTVLGD  
RVPAYEDLHQ LRYTAMVVEEAIRLYPPVWILTRKARAEDEIGGYRVPAGA  
DILICPYTLHRHPRFWAE PERFDPERFDPSRTTDRPRYAYIPFGAGPRFC

VGNNLGMLEATLVLA VLLRDLRLEGLPGRAVVPEPMLSLRVRGGLPMTVR  
RVD

>CYP244A13 (2517988563) *Salinispora pacifica* CNT851

MQDTAQAKLAEAPEVTMPIELRPTDCLPELLAAARVAPVVRTPYLDQHAW  
VVC DRELVKQAL THPKLGKDVALAPDWMRQPGQMTAMPPPEYARMMVMS  
DGEHHARIRRIHAPVLS PRNTERWSERVAALIDGFLDNLDSADGTEVNLI  
TDYTHKIPLAFTAEMGLPPGAERRLHDITEVTLYSADYALRQQAVGELF  
EAVQEWVRDPAGLRDGVVTGLLACTDGPDATVTESEAI VWTLSLIINGYE  
TTGSLISAALYEALRRPARERPHTDEAVA AWIEETLRVQPPVPNTTWRFA  
LADLDLGGYLIPRGAPVQISLAAANLNPDEDADSFDAQRRGRGHL SFGLG  
AHYCIGAPLARVQTKIALRGFLRRFPQARLSPDTPRWESEWMIRRM SVL  
PVLLA

>CYP107AY9 (2517988584) *Salinispora pacifica* CNT851

MSQDQPTRAELAPIPRSGARIGPEYDQLRKTDGVHQVLLPDTSM AVLTS  
PELVSRALADPRLALNRKHSRGGWSGFALPPALDANLLNLDAPDHTRLRR  
LVGPAFSPQRVAALRPRIQRTAEELAETVVATGSPVDLVTGYCTPLSVQV  
IADLLGVPEAGRTDLRAWTD TMLTSYPPDRDAIRQAVVELHGYV VNLIEA  
KQQRPGDDLLSALVATEQEGDRLTRDELTS LAFLILFAGYENTANLI AST  
VLRLLDHGSLRGVRASEAIEETLRLEPPAPAAIRRFPT EEMTIGGATIPA  
GDTVLLSIAAATRGADGNPARLAFGNPHYCLGAALARA EAEAAITVLAR  
RLPGLALVVP GAVRWRPTFRTHGPAELLVAV

>CYP1005A6 (2517988959) *Salinispora pacifica* CNT851

VSVVLFERSWTKTAGTHWPAVTRVADQQGTEHLVVTEHALVRQVLT DQVTY  
RPDNALDAVTPIPVAAALRVLAGHRFRLPPTLANNGGVSHPAIRALVADAL  
HPAKVAAQR PWLT ELVAERVA AIRATLDSGGSADLHAE LSADLPLLVLAR  
LVELPDAPVA AVKQFARA ALELFWAPLDADRQLALADEVGRFHQV LREFA  
DTGGGLAAALRATGHPPDVLVGALFFLLVAGQETTSQFL TLLLHRLAGEP  
TVRAALRDGSVSVTNVVEEGLRLEPPIV TWRRVAAVDSTLGGTAVPAGTS  
VLLWLARAGRDPAIVSAPDEF RPGQRGSRRLAFGAGAHRC LGDQLARME  
AAVVVERVSPLLDGVAVVRAPWYPDNLTFRMPDAFVIRRG PAGSAER

>CYP107NG1 (2517989055) *Salinispora pacifica* CNT851

VTIPAGHSPAVCDFPVVQPDRLAVEPLFADLRSRTPIVRVRLPFGGTAWL  
LTRYRDIRAVLASAQCCRAATDPDTPRILPRAGGEGLLMSLDAP EHTRL  
RGLVTAWFTTRRVESLRPATEQAARQLIADMRGTGRADLVEQFSQKLSAT  
VIGDLLGVPRSDRET FQRWSEALLSSTSYTQTQVQQATAELNNYFGYLID  
QRDSHP SDDL VGTLVRNMKAGKLSRREVLALVTDLLVAGFETTAGQLTNS  
VYTLSTTPGAWAWLAADRTRIPAAVEELLRALPLGAGGFRARVTTAPLTL  
GGDTRPTTIPAGHVIIAPTIAANTDPEAFDEPLTIRLDRPRNQHLAFGH  
GAHRC LGAPLARMELTTALGELIEAFPSLTLVAPETDLQWKSGLQIRGPR  
ALPVTW

>CYP107E37 (2517989167) *Salinispora pacifica* CNT851

VTIDQEIREYPFRESSGIGIDPTYELLRRTEPLARVQLPYGEVSWLVTRY  
EDVKTVLTDPRFSRAAAQ GKDQPRTRAEMTYEGII GLDPPDHTRLRLLAG  
KALTARRVN AIRADAQRIAHEYVDEMI AKGSPGDLVELVALPYPVTVICE  
LLGVPFEDRAQFRIWTEGLTSTSEQLMAYAEQLFDYMGKLVAQRR AEPTD

DLLGALVKARDEGDRLTEQELLSIAGVGLLLTGIVETVSTHIPNFVYALLT  
HPELMAQLRADRSLVPAAVEELLRMIPLNPAAMFPRYAVEDVTLSGFTVR  
AGQPVLVSLPGANRDPEVFENPETFDFTRDQNPVAFGHGPHHCLGAQLA

>CYP125A65 (2517969954) *Salinispora pacifica* CNT124

MTEPRIPVGFDFDPTVLERRVPREEFAELRRRTAPVWWNVQPRGSAGFDD  
DGYWVVTRYADVMASRDSEYSTRENTAIARFQPGTTRADLEMQRVIML  
NVDPPHEHTKLRAIVSRGFTPRAIHALRGSLAERAERIVRDAAVRGTGDFV  
TDVACELPLQAI AELIGVPQHHRKVFWDWSNQLIGYDDPAYGVDPMAAAA  
ELLGYAMEMADERQNRNPSDDLVTKLVNQAIDGHEHLTTDEFGFFVMLLAVA  
GNETTRNAITHGMLAFLEHPEQWELFKAERPRSAVEEIIRWATPVNVFQR  
TALVDTTLGGQAI SAGQRVALFYGSANFDES VFEEPERFDITRSPNPHLG  
FGGSGVHFCLGANLARLEIELIFNSIADHMPDIRKVADPQRLRSGWINGI  
REMPVRYR

>CYP211C9 (2517970085) *Salinispora pacifica* CNT124

VPDIEGLLARLYSARGRQDPYPVYADLHAQAAIAALTPGPGRQRVAAVAV  
GYDLIAAVLRDPEWCKQPPPGWRDQEILRILQSSMMFINPPDHGRMRHVF  
AGTFTPRRLGALEPVINRVTDDELDRMADAEPGEVDFVAEFAYPLPARVM  
AEFIGIPTTELAWYRERVDRVDAFLDVAGKTPERLAAANAAGAE LRAFYR  
ELLARRRRTPEGDLISGLVEAVDAGGVELTEDELISNLIVLFNASFVTTV  
YLLSNGLPVLLAHPEVAAALADNP ELAAGAVDEILRLQTPVHLLARAAPR  
DTVLGGSVIPQGNVLLLI AAANRDP AHFPDPDRFDPRRSGPSSLA FGLG  
LHYCLGA AVSRLEGR LALPRLLSRFPRLRILEQPVYSGSLFLRGIDKLSV  
SPGGRSIRE

>CYP154AJ2 (2517970143) *Salinispora pacifica* CNT124

VDDESLFVIDPAGADIHGEGARLRASGPITRVLLPGGVEAWSVTGYHAAR  
QVLADARFAKNARQHWPAYVNGDLGPDFPLIAWARMDNMSTADGES HARQ  
RRLVAGAFSPQRI AALQPRVERAVARALDELAQA AERPGEPIDLKERYA  
HPVAARVIGELLGVPDGD PDGILDRAGYIESTPQRAAE EFALLRSKIETL  
VAAKRRAPGEDLISDLIAAQPSGCPVAGAGAGSDAELVGLAQLMLNTGAE  
PARNLITNTVLALLTRPGQRAQVMSGEVSWGDVVEETLRTDAPVAHLPFR  
FATEDVTIAGTTISRGD PVLVGYAATGRDPELHGATAGEFDARRADKRHL  
AFGHGVHRCVGPALTRMEVRI AVEALFTRFPGVRLAVEPKELVGQGT FVM  
NGRREL PVQGLCAQP

>CYP107AX10 (2517970262) *Salinispora pacifica* CNT124

MTAQPA PVFDQRLLRDPHRRYNALRDQAPVHHVTRPDGAPAWLVTRYDDV  
RAAFTDPRLSVDKRFSGTDGEHGSSLPPELDAHLLNRDPPDHTRLRLRLAA  
AAFTPRRVADLRPAVERTVSTLLDGLAGNDHAELIGSLASPLPLQVMHEL  
LGLPTQTSVDFRTWTNTLLSADANQPAQSRSAMANMRRFLVEQVAHKRAR  
PGDDLLTGLLCVREDDDG LTTDELVAMLFLLMFAGYDNTAALIGNVIHAL  
LTNAELAEAVRTRSLALDELVDGVLRWNP SFPLAVRRFA REPIT IAGQAI  
PAGDRIWLCLASANRDP AHFTEPDEIGIADMRRPHLSFGHGIHYCLGAPL  
ARLQTTVAVASL FDRFP GIRLAMPVQDIQWRESFRLRGLVALPVFL

>CYP107AW6 (2517970276) *Salinispora pacifica* CNT124

VETVTGTSAPPPVPYIADPYPTLARIRANGPVSI LHSDEGVPMWVIARYR  
EVRAALADPRFGQDARRAQALADNRVAGVT LGGDIVHMLNSDPPDHTRLR  
RHVQGAFTARRVAAMRPLVERITTSLLDGLAGRKTVDLVQDLAFPLPMLV

ICELLGFP AEERNAYRSWSTAILTHDDDP AVFATALREMTDYIAVQLRLR  
RSRPGDDLLELLTARDAGQLTDDEIVGMVFLLLIGGHETTVNLLGTATL  
ALLRNPDQHRWLLANQHALPEAIDEFLRYESPVAMATLRFTTTPVTVDV  
VIPAGELVLVSLGGANRDPDRFPAADRLLDRLDRDTHGLAFGHGLHRCGLGA  
FLGKLEGEVALGALLRRHPKLALAAEVRQLQWRDTIMLRGLESPLVSLHG

>CYP245A11 (2517970360) *Salinispora pacifica* CNT124

MSSTTLPRFTLTGWTRDIVNPYPVYRRYREVA AVHRGEAGGDAPETFYV  
FSYDEVAQVLSSSCFGRGRSLDATAASVPVPADQKALRAVVENWLVFMDP  
PRHTELRSLNRSFSPRIVTGLRPRIARIAQELL SRLGQQVETDLVEGFA  
APLPILVIAELLGIPAERHGWLRNTAIALQEASSSRARRD TDGYARAEAA  
AQEFTEYFREQVCLRRGSTGDDLLTILANAQLRGAPVSLDAVVGTA VHLL  
TAGHETTTNSLAKAVLALQAHPAVLEELRGADRLTADSIEEFLRYDPPVQ  
AVTRWTHQD TTLGGWDVPRGSRVVAL LGSANRDPARFPLPDALDVRRPAD  
RHLGFGLGIHYCLGATLARAELEIGLQTLLNGLPTLGYPAQYVDYADDMV  
FHGPSRLILVNPGERFC

>CYP244A5 (2517970364) *Salinispora pacifica* CNT124

MSATTNAELHEAPETAMPVDPGLFDCMPDLIAAARIAPVVRIPYLGRHAW  
VVCDELVKQALTHPKMGKDITLVPEWMRQPGLMVTAQPPPEYARAMIMS  
DGENHARIRRIHAPVLSRPNTERWGEQVADKVEGFLDELSQAAAGSSAEV  
DVVTNYTHKIPLAFISEMLGLPPVAEHRLRSITDIMLYSSDYAARREAIG  
GLFGAVEEWVRNPAGLRDGVITGLLAGSDGPAAVTEGEVIVWTLGMIIT  
GYETTGSLISTSLYEALRRPPHERPRTDEDITAWIEETLRVHPPFPHTW  
RFPLEDIELGGYLI PKGAPVQVSI AAANRQPGEGADSFDAERRGHGHL SF  
GLGMHYCIGAPLVRLEAKIAVRGFLRRFPQARLSADTAVQWESEWMIRRM  
SFLPAVLS

>CYP105AB27 (2517970968) *Salinispora pacifica* CNT124

MTETASITTPGTSSTTTSEPASGQVTD AEFFPVERGCPFSTPVEYEQIRDH  
SPLAKVRLTTGREAWWIAGHELGRAVLADRRFSSDRRRDNFFVSTDPET  
RRQLQDQPTSMIGMDGAEHAQARRALMGFTVRRMAGLRPRIQQIVDQHI  
DEMLSSDQRTADLVEALS LPVPSLVICELLGV PYADHDFQARSGLIRH  
TTPTEVRLRIQEELNTYLGALIDRKVTEPTD DLLSRQIAKQRAAGTFDRT  
SLVSM AFLLLIAGHETTANMISLG VVGLLQHPDQLAMIKDDPEKTPPAVE  
ELLRYFTIADTVTARVATEDVQLGGTTINAGDGVVISGLAADHDPTVFTA  
PDRDLERGARHHVAFGFGPHQCIGQTLARMELQIVFDTLFRRIPTLRRLA  
APLDDIPFKSDAFVYGA EKLPVAW

>CYP211B16 (2517971959) *Salinispora pacifica* CNT124

MDASEAVALLMSPGRDPYPTYERLRAHGPPVATAAGFFVVTGYAEADT  
VLRNPRFAVMDDEERDGVFPHWQDSPAMMSISQSMIRANPPDHSRMRLA  
AGVFTPRRVAALREVVAQADELIDEMIRAGRGGAPVDFLGGFAYPLPVT  
VICALLGVPAADWAQFRRWAGDLTG VLEPEITPQELAVADAGATELRDYF  
TELIAQRRRDPADDLTALVQTHDADGDRLSGEELLANLVLLLVAGFETT  
TNLLGNGLFVLLTHPESATALRDQPELAPSYVDELLRYDSPVQLTSRTVR  
ESVPLAGVELPAGSWLLVLLGAANRDPARFTD PARFDPGRAQSPPLSFGA  
GAHYCLGAGLARLEAQVAFPLLLRRLPELALAGEPVRRSRLTLRGYETLP  
VTVGAVAADHGTPAGAALGTP

>CYP105BL3 (2517972294) *Salinispora pacifica* CNT124

MSSHSAAPDPETATPLHTLAPELTFPQFERATPFDPPEAYTELSGRCPV  
APVRMADGKPSWLITSFEGVRAALSDPRLSSDMSHPGFPNRTGKPVDDL



KDTLGAMDGERHRYRRMLTGELTVRRAKAMRPVITQITDEALDQLAAAG  
PGADLVTHVALVVPSPRVACHLVGIPLSEYELFTGMAAKLMDSTSSADQIA  
ALQDMVSYFDTLVTDREHHDRDDLLGHMVRRYLATGELDREMLIRLAWTT  
MAAGQETTAHMIIGLGVAALLRHPDQLELLRREPHLMPGAVDELMRYLPMI  
QFGIPRVAMDDVEVDGQTVTAGEGVVALPPLANRDPVFERPDELDVRRN  
ARQHLSFGYGPHQCPAHALARLELEVYGRLLERFPTLRLADGDADLKVQ  
DEDIMYRVSELAVAW

>CYP208A27 (2517972399) *Salinispora pacifica* CNT124

MTVITKRGGRVPPGPPVTAGLRLLALGRDRLGMLTSAATEYGDVARLPV  
GPKRLYFFNHPDHAKHVLADNHANYAKGIGLVNARRALGDGLLTS DGELW  
RRQRRVIQPAFLNRRLTQYAGVVGQEATRLAERLATRVDPGPVDVLD  
RLTLGVLGRTLDDAELTGFGHVGESFAAVQDQAMFELETLSAVPTWIPLR  
RQRRFRARRRHLQEVVDVLAERGQDVEGRDDVLSRLILSTRAEADPALG  
RQRLDELVTLLLAGHETTASTLGWSLYLLDKHPQLRERVRHEATSVLGD  
RVPGYADLHQLQYTAMVVQEAIRLYPPVWILTRKARAEDEVGGYRVPAGA  
DLLICPYTLHRHPRFWEEPGRFDPERFDPARLANRPRYAYIPFGAGPRFC  
VGNNLGMLEATLVLAVLLRDLRLLEGLPGRAVVPEPMLSLRVRGGLPMMVR  
RAD

>CYP107FH3 (2517972807) *Salinispora pacifica* CNT124

VPIELDEAFVQDPYAVYERLRAEGPAHRVRMPPGVPLIGGLPVWLITGYD  
AVRAALADSRSLSTDLHRIDGLFAQKDPDRSHRGGFSSALASHMMHTDPPD  
HTRLRKLVSQAFTRAIEALRPRIQQTDELIADLAGHDTVDDLDAFAFP  
LPIRVICLLLGVPVAEQENFRSWSRALVSGHSPEAAATAATEVAAYLGDL  
VERKRQATTDDVLTALVTAHDVDDRLTHTELVSTAYLLFIAGFETTLNAL  
GNGTLHLMLHRDQWTALRADRALLDNAVEEFLRLESPLKHATFRCATESL  
RIGDAEIAAGDFVLLAIASANRDPRRFPDPHTLDVRRPAAGHLAFGHGIH  
HCLGAPLARVEVRMAFDALLDAFPDLRLATDPAGLRWRNSTIIRGLDSL  
VHLNN

>CYP2054A3 (2517972811) *Salinispora pacifica* CNT124

MPISADSEQVQGRPFDPYGAHRDDPYAFLAGLGVFYAPLLDAWCVTRRED  
MVAVLRDDRSFSARDHNPRPAVALPDDVNQMFRWTRGAGAVAVGSLDPPA  
HAKIRDVLNIGFTPARVRAFEPTMRAVATDLADRIGDAPEFDFIADFAPV  
FALEVIGRRLGVFPDDYLDRCRTWSEQRIELMMAQGDADHDRLREFARGLM  
EFGEFARSLVRDRVADPRDDLISELLHDGKAGRTLTADEVAVQIPTLIFA  
GHMTCAEALGTIFYQQLRSPGGWARVVDRTIPVGDVVEEGLRFDSPLAGM  
YRTATRDVTVGGIRLTAGSRLLLLLYGAAGRDSRAHACPAAFRPGDGSSGH  
LAFGHGIHFCLGAGFARAELRVAVEVLAARMPDLGLAPGRPPRFRPVFPL  
RALTELVRVTRSGGCGP

>CYP161N4 (2517972816) *Salinispora pacifica* CNT124

VNTVAQLPFTQTHVLDVAPALRLLQSRGKVHRVRTPEGVPAWLVTGHAEV  
QQLLDDDRLSRSDPGGRDGGTALLNKLLGPLADDDHPRLSLLEPQFTPER  
LEPLRAIVEKLTEQHLDELATRTPPVDLRPALAMSLPILVLCWLVGP  
DKDRFSAWTQDAAGVQDPERSQRGLAELFGYCRQLVAAKRQDPGDDVISR  
LIATAGIGDTEVVALTALLLFGGYETTVARIGTGVLTLTNPQWAAVRA  
DPALMPATVDELLRRSMPNPNHNGGMPRFALTGFEIDGAAIRAGDLVLLNI  
IAANHDETAFPDPDLVDVTRPTAGSLAFGYGRHSCVGAPLARMVLRVALS  
RLITRFPDLCLAVGVDELKLRHETLVGGLVELPVWTWGPR

>CYP1226A3 (2517972976) *Salinispora pacifica* CNT124

MTRTLRTPTSAPGRLPVLGHGLHMKRRPAEFLLELQSGEPVVTIALGRRP  
AYVVNDHTLMRELLRDGDTFVRGGPMTERFRSMFGNGLGISEGEFHRRQR  
ALIQPAFHRNKVIHYTELSRTVAGTRDSWRDQQLAVEKEMDELALTNV  
VEVIFAGDRSVDRARFMAATTTVLGGLFRRITDVTGVLTRLPTQANRDYD  
AAAEYLRAITIRRVIAEYRAAGTDHGDLLSMMLFARDEDGRPAMSDQQVHD  
EVMTEFFIAGSNTIANTLCWALHQIGADAEVERRLYAEDRVLDGRAAGYA  
DVANLEYTRQVLSETLRLRTQGLFNNRVTARDAELGGYLIPAGSAVLYSF  
HAVHHNPRIYPEPERFDPDRWRPERARALPHGAFMPFATGVHGCIGDQFA  
WTEMIIVSLASIVARWRLEPVPGHQPKPVPAMTMPVDSLPMTVRLRSC

>CYP285D2 (2517973049) *Salinispora pacifica* CNT124

MSVSNETVGAVRLAEVNLFDPAFHTGDPHPLWRVMRERAPLHRQVLADGR  
MFWNVTRYHDVCRVLGNHRQFTSERGSLISQLGTVDAAAGRMLVSTDPPR  
HLQLRRPLASLFAQPAEALRGRLQHGVRLINAAAPVDESWDLAVDVQQL  
PMVAAAAMVDLPESDWPDLIRWTGMAAAPSDPAFSVGSTAATLAIHHHEL  
FDYFAGQVRDRRKHPGDDVISHLLSMHAGDGPLTREEVIFNCYSILLGAN  
ATTPHTVSGTVLALVERPGLLGELTGHPEAATDLVEEGLRWTSAASSFMR  
HAVVDTELSGGVVVRAGDAVAAWVGAANRDPVFPDPERFDPARRNNRHVA  
FGHGPHYCLGAALARVTLREFFAEFLQTFVSVQLAGQLQRLASNFIAGLT  
HLPLSVRRRA

>CYP1005A8 (2517973631) *Salinispora pacifica* CNT124

VSAVLFERSWTKTAGTHWPPVTRVADQQGTEHLVVTEHELVRQILTDQVTY  
RPDNALDAVTPIPVPALRVLAGHRFRLPPTLANNGGVSHPAIRALVADAL  
HPAKVAAQRPWLTKLVAERVAAIGATLDSGGSADLHAELSADLPLLVLAR  
LVELPDAPVSAVKQFARAALFWAPLDADRQLALADEVGRFHQVLREFA  
DTGGGLAAALRATGHPPDVLVGALFFLLVAGQETTSQFLTLLHLRLAGEP  
TVRAALRDGSVSVANVVEEGLRLEPPIVTVRRVAAVDSTLGGTAVPAGTS  
MLLWLARAGRDPAIVPAPDEFPRPGQGRSRRHLAFGAGAHRC LGDQLARME  
AAVVVEQATPLLDGTSVVRAPWYPDNLTFRMPDAFVIRR

>CYP161T1 (2517973853) *Salinispora pacifica* CNT124

VTTQVFRTKTPIGHPAWLVTDYESVRDLLSDPRLRLTHERPGEAARLSNS  
VIFGRPQPSSETEAADHTRMRKLAQWFSARRLATFRPRLRELVDGLLDE  
LAATPKPADFHQVVSFPLPALVICELLGVPIADREQFRWSDDAADMYDQ  
ERSVGGYQALRDYIAELAQVRLRMPGTDLISDLVESHRTPEGFTLDQVV  
ELGLTLLFAGHETTVAIDNGAVLLATHPEQRDLRAGDPSLLDAAVEEIL  
RGSVPRMNFFARPDDTD PAGALPRWANTDLVIGDVTVRAGELVLLGLAHA  
NVDERFFAESACFDVGRVPPNRHLTFGIGPHFCAGAPLARLELQELFVALL  
ERFPGRLRLAVPAERLEPRANLLTGGMTRVPVTW

>CYP107AY8 (2517974011) *Salinispora pacifica* CNT124

MRAEPAPIPRSGARLGQEYDQLRKTGDVHQVLLPDTSLAWLVTSPELVSR  
ALADPRLALNRKHSRGGWSGFALPPALDANLLNLDAPDHTRLRRLVGPAF  
SPQ RVAALRPRIQRVAEELADTVVATGSPVDLVTGYCTPLSVQVIADLLG  
VPEAGRTDLRAWTDMLTSYPPDRDAIRQAVVELHGYYVNLIEAKQQRPG  
DDL LSALVATEQEGDRLTRDELTS LAFLILFAGYENTANLIASTVLRLLD  
HGSLRGVRASEEIEETLRLEPPAPAAIRRFPTTEMTIGGATIPAGDTVLL  
SIAAATRGTD EHSARLA FGN GPHFCLGAALARVEAEEAITV LARRLP SLA  
LAVPGAPVRWRPTFRTHGPAELLVTW

>CYP107E37 (2517360952) *Salinispora pacifica* DSM 45544

MTIDQEIREYPPFRESRGIGIDPTYELLRRTEPLARVQLPYGEVSWLVTRY  
EDVKTVLTDPRFSRAAAQGKDQPRTRAEMTYEGIIIGLDPDPDHTRLRLRLAG  
KALTARRVNAI RADAQRIANEYVDEMIAKGSPGDLVEAFALPYPVTVICE  
LLGVPFEDRAQFRIWTEGLTSTSEQLMVYAEQLFDYMGKLV AQRRAEPTD  
DLLGALVKARDEGDRLTEQELLSIAGVGLLLTG VETVSTHIPNFVYALLT  
HPELMAQLRADRS LVPAAVEELLRMIPLNPAAMFPRYAVEDVTLSGITVR  
AGQPVLVSLPGANRDPEVFENPETFDFTREQNPHVAFGHGPHHCLGAQLA  
RMELQVALHTVLDRFPDLRLADGDEGVSWKSGLLVRGPSRLLVGW

>CYP208A22 (2517361049) *Salinispora pacifica* DSM 45544

MTVIADRGGRI PPGPPV TAGLRLLLALGRDRLGMMTSAAA EYGDVARLPV  
GPKKLYFFNHPDHAKHVLADNHANYQKGIGLVHARRALGDGLLTSEGELW  
RKQRRVIQPAFQNRRLAQYAGAVGQEATRLVARLATRVDGPPVDVLDEMT  
RLTLGLVLRGRTLLDAELTGFGHVGESFAAVQDQAMFELET LNTVPTWIPLR  
RQRRFRRARQHLQEVVDVLA AERGQAVEGRDDVLSRLILSTRAEADPQLG  
RERLRDELVTLLLAGHETTASTLGWSLHLLDQHPELRRERV RHEARTVLGD  
RVPAYEDLHQLRYTAMVVEEAIRLYPPVWILTRRARA EDEIGGYRVPAGA  
DILICPYTLHRHPRFWAEPERFDPERFDPSRTTDRPRYAYIPFGAGPRFC  
VGNNLGMLEATLV LAVLLRDLRLEGLPGRAVVPEPMLS LRVRGGLPMTVR  
RVD

>CYP125A65 (2517361139) *Salinispora pacifica* DSM 45544

MTEPRIPVGFDFTDPAVLERRVPREEFAELRR TAPVWWNVQPRGSAGFDD  
DGYWVVTRYADVMASRDSETYSTRENTAIARFQPGTTQADREMQRVIMI  
NVDPP EHTKLRAIVSRGFTPRAINALRGSLAERAERIVRDA AVRGTGDFV  
TDVACELPLQAI AELIGVPQHHRKVF DWSNQLIGYDDPAYGVDPMAAAA  
ELLAYAMEMANERQ RNPSSDDLVTQLVNAQIDGEHLTTDEF GFFVMLLAVA  
GNETTRNAITHGMLAFLEHPDQWELFKAERPRSAVEE IIRWATPVNVFQR  
TALVDTTLGGQAITAGQRVALFYGSANFDES VFEEPERFDITRSPNPHLG  
FGGSGVHFCLGANLARLEIELIFNSIADHMPDIRKVADPQRLRSGWINGI  
REMPVRYR

>CYP107AX4 (2517361499) *Salinispora pacifica* DSM 45544

MTSQPAPVFDQ LLLRDPHRRYNALRDEAPVHHIRTPDGAPAWLVTRYDDV  
RAAFTDPRLSVDKRLSSTDGEHGSSLPELDAHLLNRDPPDHTRLRLRLAA  
AAFTPRRVADLRPAVERIVSTLLDGLVGH DQAE LIGSLASPLPLQVMQEL  
LGLPTQTSVDFRRWNTLLSADANQPAQSR SAMANMRRFLVEQLAHKRAR  
PGDDLTLGLLAAREDDRLTDDELVAMLFLLMFAGYDNTAALIGNVVHAL  
LTNTELPAAVRTGSLALDELVDGVL RWNPSFPLAVRRFA REPIT IAGQTI  
PAGDRIWLCLASANRDPAQFTAPDTLGTTGMRRPHLSFGHGIHYCLGAPL  
ARLQTTVAVTILLDRFP GIRLAVPAHDIRWRESFRLRGLVALPVFL

>CYP107AW7 (2517361512) *Salinispora pacifica* DSM 45544

METVTGTSTPPPVPYIADPYPTLARIRANGPV SILHSDEGIPMWVIARYR  
DVRAALADPRFGQDARRAQALADNRVAGVT LGGDIVHMLNSDPPDHTRLR  
RHVQGAFTARRVAAMRPLVERITTSLLDGLTGRTTVDLVQDFAFPLPMLV  
ICELLGFPAEERNAYRSWSTAILTHDDDPA AFATALREMTDYIAVQLRIR  
QTRPGDDILTELLAARDAGQLTDDEIIGMVFLLLIGGHETT VNNLLGTATL

ALMRNPDQHRWLLANQHALLPEAIDEFLRYESPVAMATLRFTTTTPVAVDDV  
VIPAGELVLVSLGGANRDPDRFPDADRLILDRRDTGHLAFGHGLHRCLGA  
FLGKLEGEVALGALLRRHPRLALAAEVRQLRWRDTIMLRGLESPLVSLHG

>CYP211B11 (2517361951) *Salinispora pacifica* DSM 45544

MDASEAVALLTSPPGRLDPYPTYERLRAHGFPVVSTAAGFFVVTGYTEADT  
VLRNPRFEVMDDEERDGVFFPHWQDSPAMISISRSMIRANPPDHSRMRLA  
AGVFTPRRVAALREVVAQAADGLVDEMIRAGRGAADVDFMGSFAYPLPVT  
VICALLGVPAADWARFRHWASDLTGVLPEEITPQELAIADAGASELRDYF  
TELIAQRRRAPADDLTALVQAHDADGDRLSGEELLANLVLLLVAGFETT  
TNLLGNGLVLLTHPDSATALRGQPELAPGYVEEFLRYDSPVQLTSRTVR  
ESVSLAGVELPAGSWLLVLLGAANRDPARFTDPARFDPRAQSPPLSFGA  
GAHYCLGAGLARLEAQVAFPLLLRRLPELALAGEPTRRHRLTLRGYETLP  
VTVGAVPADPGTPAGVALGTP

>CYP1005A6 (2517362283) *Salinispora pacifica* DSM 45544

MSAVLFRSWTKTAGTHWPAVTRVADQQGTEHLVVTEHALVRQVLTQVQTY  
RPDNALDAVTPIPVAALRVLAGHRFRLPPTLANNGGVSHPAIRALVADAL  
HPAKVAAQRPWLTTELVAERVAAIRATLDSGGSADLHAELSADLPLLVLAR  
LVELPDAPVSAVKQFARAALFLWAPLDADRQLALADEVGRFHQVLRIFA  
DTGGGLAAALRATGHPPDVLVGALFFLLVAGQETTSQFLTLLHRLAGEP  
TVRAALRDGSVSVPNVVEEGLRLEPPIVTVRRVAAVDSTLGGTAVPAGTS  
VLLWLARAGRDPATVSAPDEFPRPGQGRSRRHLAFGAGAHRCCLGDQLARME  
AAVVVEQVSPLLDGVTVVRAPWYPDNLTFRMPDAFVIRRGPAAGVAER

>CYP105AB28 (2517362537) *Salinispora pacifica* DSM 45544

MTETASTTTPGISSTTTSGPASGEVTDAEFPLERGCPFSTPTEYEQIREH  
SPLAKVRLTTGREAWWIAGHELGRAVLADRRFSSDRRDNFPPVSTDPEP  
RKQLQDQPTSMIGMDGAEHAQARRALMGFTVRRMAGLRPRIQQIVDQHI  
DEMLSSDQRTADLVEALSPLVPVSLVICELLGVVPYADHDFQARSGPLIRH  
TTPTEVRLRIQKELNTYLALIDRKVTDPTDDLRSRQIAKHHAAGTFDRT  
SLVSMAFLLLIAGHETTANMISLGVVGLLQHPDQLAMIKEDPEKTPPAVE  
ELLRYFTIADTVTARVATEDVQLGGTTINAGDGVVISGLAADHDPTVFTD  
PDRDLDERGARHHVAFGFQPHQCIGQTLARMELQIVFDTLFRRIPTLRLA  
APLDDIPFKSDAFVYGAERLPVAV

>CYP164C2 (2517362738) *Salinispora pacifica* DSM 45544

MTARAGSAAEDIIQLADRMGREDPYPVLHRMRQASPYVALPGLVVAGTHA  
TCSAVLRDPGMSSERQRATLAPAARGPRTNRLHLDPPDHTRLRLRVSKV  
FTPRVVATMEPHIRRTTDDLTAARGSMEEVADLAYPLPLRIICEVLG  
VPAEDHHLVQHSARLSEALEPPIPLVSTTTSTEAARARAGFIAYFQAL  
IADRRRSRADLVSQLVAVEDASERLDSSDILATCILLINAGHETTVNLI  
ANGVLALLRHPEQLADLRAEPGLAAATVDEVRLYDAPVQITSRVAKHDTR  
LGAADVVRAGDMVLLLGAAANRDPVYPDPDRFDIRRRSPVPHLAFSAGAH  
FCLGAGLARLEAQIALSAVAARLREPRLRAGGVSYKPNLSLRGPDVLTVD  
FDDVLAPGRRDQGEANG

>CYP107FH3 (2517362830) *Salinispora pacifica* DSM 45544

MPIELDEAFVQDPYAVYEKLRAEGPAHRVRMPGPVPLIGGLPVWLITGYD  
AVRAALADSRLSTDHLRIDGLFAQKDPDRSHRGGFSSALASHMMHTDPPD  
HTRLRKLVSKAFTTRAIEALRPRIQQTDELTAADLAGHDTVLDLDAFAFP  
LPIRVICLLLVGPVVAEQENFRSWSRALVSGHSPEAAATAATEVAAYLGDL

VERKRHATTDDVLTALVAAHDVDDRLTHTELVSTAYLLFIAGFETTLNAL  
GNGTLHLMLHRDQWTALRADRALLDNAVEEFLRLESPLKHATFRCATESL  
RIGDAEIAAGDFVLLAIASANRDPRRFPDPHTLDVRRPAAGHLAFGHGHIH  
HCLGAPLARVEVRMAFDALLDAFPDMRLATDPAGLRWRNSTIIRGLDSL  
P  
VHLNN

>CYP2054A3 (2517362835) *Salinispora pacifica* DSM 45544

MSISADSEQVQGRFPDPYGAHRDDPYTFLAGLGVFYAPLLDAWCVTRED  
MVAVLRDDRSFSARDHNPRPAVALPDDVNQMFRTWRGAGAVAVGSLDPPA  
HAKIRDVLNIGFTP PARVRAFEPTMRAVAADLADRIDGAPEFDFIADFAPV  
FALEVIGRRLGVPDDYLDRCRTWSEQRIELMMAQGDADHDRLREFARGLM  
EFGEFARSLVRDRVADPRDDLISELLHDGKAGRTLTADEVAVQIPTLIFA  
GHMTCAEALGTIFYQQLRSPGGWARVVDRTIPVGD LVEEGLRFDSPLAGM  
YRTATRDVTVG GIRLTAGSRLLLLYGAAGRDSRAHACPAAFRPGDGSSGH  
LAFGHGHIHFCLGAGFARAE LRVAVEVLAARMPDLGLAPGRPPRFRPVFPL  
RALTEL RVTRSGGSGP

>CYP161N4 (2517362841) *Salinispora pacifica* DSM 45544

MNTVAQLPFTQTHVLDVAPALRLLQSRGKVHRVRTPEGVPAWLVTGHAEV  
QQLDDDDRLSRSDPGGRDGGTALLNKLLGPLADDDHPRLRSLLEPQFTPER  
LEPLRAVVEKLTEQHLDELATRTPPVDLRPTLAMSLPILVLCEWLGVP AE  
DKGRFSVWTQDAAGVQDPERSQRLAELFGYCRQLVAAKRQDPGDDVISR  
LIATAGIGDTEVVALTALLLFGGYETTVARIGTGVL LLLTNPDQWAAVRA  
DPALVPATVDELLRRSMPNPHNGGMPRFAVTGFEIDGAAIRAGDLVLLNI  
IAANHDETAFPDPDRLDITRPTAGSLAFGYGRHSCV GAPLARMVLRVALS  
RLITRFPDLRLAVGVDELKLRHETLVGG LVELPVWTWGPR

>CYP107AY9 (2517363981) *Salinispora pacifica* DSM 45544

MSQDQPTRAELAPIPRSGARIGPEYDQLRKTDGVHQVLLPDTSMAWLVTS  
PDLVSRALADPR LALNRKHSRGGWSGFALPPALDANLLNL DAPDHTRLRR  
LVGPAFSPQORVAALRPRIQRTAEELAETMVATGSPVDLVTGYCTPLSVQV  
IADLLGVPDAGRTDLRAWTDMLTSYPPDRDAIRQAVVELHGYVVNLIEA  
KQQRPGDDL LSALVATEQEGDRLTRDELTS LAFLILFAGYENTANLIAS  
TLRLLDHGSLRGVRVSEAIEETLRLEPPAPAAIRRFPT EEMTIGGATIPA  
GDTVLLSIAAATRGADGNPARLAFGNPHYCLGAALARVEAE EAITVLAR  
RLPGLALAVPGAPVRWRPTFRTHGPAELLVAV

>CYP244A10 (2517364001) *Salinispora pacifica* DSM 45544

MQDTAQANLAEAPEVRMPIELRPTDCLPELLAAARVAPVVRTPYLDQHAW  
VVCDRELVKQALTHPKLGKDVALAPDWMRQPGQMVTAMP PPEYARMMVMS  
DGEHHARIRRIHAPVLSRNTERWSERVAALVDGFLDNLDSADGTEVNLI  
TDYTHKIPLAFTAEMLG LPPGAERRLHDITEVM LYSADYALRQQAVGELF  
EAVQEWVRDPAGLRDGVITGLLASADGPDATVTKGEAIVWTL SLIINGYE  
TTGSLISAALYEALRRPARERPHTDEAVA AWIEETLRVQPPVPHTTWRF  
A  
LADLDLGGYLIPRGAPVQISLAAANLDPDEDADS FDAQRRGRGHLSFGLG  
AHYCIGAPLARVQTKIALRGFLRRFPQARLSLDTAPRWESEWMIRMSVL  
PVLLA

>CYP107N4 (2517364343) *Salinispora pacifica* DSM 45544

MTTRDLRFGAFLSPLHPPGSDPTWLIANDLALVEHVDR LGFDEFWIGEHH  
SGGWGIVSSPEVFLAAAAERTRHLRLGTGVVSLPYHNP FFMVASRIVQLDH

MTRGRVMLGVGAGSLPSDAHMGVEPGQQRPRTAELDAVLHLLRSDEPL  
TMSTDWFDLRDARLQLRPYQHDLEVAISSAASPFSMRLAGRHGLSPLSFS  
AGLPGVGVANLPRQWAHAETATGAGRVVSRDDWRLVVSVHVAPTTEQAY  
AEVRSGRHRLQGYFGDLIGLPVTPEGVEPGEELEAMVESGGAIVGSPRD  
CIEAIERLQEVTTGGFGTLLVTVQDWAGPQQVRNSFELLASEVVPHFRGSL  
RRIEDSRRWVTQQRGVLPKAVTALQAVLAPEPPTPETRPEAAPAPSGAP  
AYPFGPPDKLEPDPHARLREHEPVSRVTLPPFGGEAWLATRYKDVRTVFA  
DRRFSRAAAVAEGAPRFFSQQPPPDAILSMDDPDHTRLRLRVGKAFGPKR  
MEQLRPRVQQITDELLAEMERRHPVVDLVEDFSIPLSVTVICELLGVPT  
DRDRFRVWSNAVLSTTAFTPEQAARYQAEHLTYLGELVARHRAKPGDNLL  
GQLASNQDEDVLSSELLRLGESILIAGHETTASHIPNFVYTLRLHPEAL  
EKLRGEPALIPDAVQELLRFVPIGAVDGMPRVATEDLQLQGVLIIRKGDV  
LPSMGSAHDERAFADPDRLDITRGSNPVAFGNGPHHCLGAPLAVVELE  
IALSSLLTRFTGLRLAVPEDELRWKNGLIVRGLEAMPVTW

>CYP1278B5 (2517365860) *Salinispora pacifica* DSM 45544

MPSPVGAVVHPNPYPYYAAMVAERPLHFDEQLDTWVAESAAAVQAVLTAP  
GCRVRPPHEPVPQGITGTGAPGVFGNLVRMTDGEPOQNRKAIVTQTLGAV  
DRDDRRRDGRTARPADPQRSQPHAVRQLMFELPAQVVAMLCGLDPAAGGE  
ASRLVGRFVQCIPAAASPEQQQRAARAAAGLQELLGPKLDDTQHGLLGDL  
VRMATQVNWTDRAPLLANGIGFLSQTYDATAALMGNTLLALSQQERERPA  
GETTLERFVREVIRHDAVPQNTRRFTTTPIRHGAVEVPAGQAILVLLAAA  
NRDPAANPNPHTFRADRTAPTFTFSAGAHRRPGEMLAVTVVTTVVEQLL  
KVGFEFASLSTQVTYRPSNPTRIPVLTDQAGT

>CYP166A4 (2518480913) *Salinispora arenicola* CNY231

MTDAISFELPWARTDKFDPPAVFDALREQRPLARMRYPDGHVGVIVSSYE  
LVREVLGDPRFSHSCAVGHFPVTHQGQVIPTHPQIPGMFIHMDPPEHTRY  
RRLLTGEFTVRRSRLTGHEGVATEQIEVMREHGAPADLVATFARPLVL  
RVLSGLVGLPYGERDRYLHAVTLLHDAEADPAEAAAAAYEQAGAYFDEVIE  
RRRRQPEDDLISTLVGDGELTGEELRNIVTLLLFAGYETTESALAVGMFA  
LLHHEDQLARLRADPTKIDAAIEELLRYLTVNQYHTYRTASEDIELHGEV  
INKGDSVTVSLPAANRDPARFACPAELDIDRETSGHVAFGFGIHQCLGQN  
LARVELRAGLSALLQAFPNLRLAVPADEVPLRLQGSVFAVKNLPVCW

>CYP211B2 (2518481964) *Salinispora arenicola* CNY231

MDVSEAIAVLISPSGRLDPYPTYEQRLAHGPVSRRTAGLFVVVTGYAEADM  
VLRDPRFVVLDLDDLRDDVFPWQDSPAIXIARSMLRTNPPDHSRIRRLA  
AGAFTPRRVAAMREVVTQADELVDDEMIRAGRDGARVDFMDMFAYPLPVA  
VICALLGVPAADRSRFRRWAGDLTGILEPEITPEELAGADAGADELRDYF  
TGLIEQRRRAPADDLTALVQAHDADGDRLSGEELLANLVVLLVAGFETT  
TNLLGNGLVLLTRPEAAAAALRDEPDLAGYVDELLRYDSPVQLTTRTVR  
ESVSFAGTELPADSWLLVLLGAANRDPRRFPDPARFDPGRAQSQPLSFGA  
GPHYCLGAGLARLEAQVAFPLLLRRLPELALAGRPSRRTRLTLRGYETLP  
ITVGAVTADRGTAGVAPGTP

>CYP105BL2 (2518482031) *Salinispora arenicola* CNY231

MSSHSAAPDPETATPLHTLAPELTFPQFERSTPFDPQAYTELSGRCPV  
APVSMADGKPSWLITSFEGVRTTLSDPRFSSDMSHPGFNRTGKPVDDL  
KDTLGAMDGERHRYRRLTGELTVRRAKAMRPVITQITDEALDQLAAAG  
PGADLVKHVAFVVPVSRVACHLVGIPLSDYELFTGMAATLMDSTSSDDQFA

ALQNMVSYFDTLVTDREHHDRDDLLGHMVRRYLATGELTRDMLIRLAWTT  
MAAGQETTAHMI GLGVAALLRHPDQLELLRREPHLLPGAVDELMRYLPLI  
QFGIPRVAMDDVEVDGQTVTAGEGVVALPPLANRDPVFERPDEL DVRRN  
ARQHLTFGYGPHQCPAHALARLELEVYGRLLERFPTLRLADSDADLKVQ  
DKDIMYRVSELAVTW

>CYP211C1 (2518482492) *Salinispora arenicola* CNY231

VVDVEELLTRLYSAQGRQDPFPVYADLHAQGPIAALPPEPERRRVA AVAV  
GYDLVGAVLRDPEWSKAPPPGWTEQEILRTLQTSMMFINPPDHGRMRHVF  
AGTFTPRRLGALEPVVNRVADELDRMADAGAGGLDFVAEFAYPLPARVM  
AEFIGIPETELDWYRERVVIDAFLDVAGKTPQRLAAAANAAGAE LRAFYG  
ELLARRRRTPGEDLISGLVEAVDAGGVELTEDELVS NLIVLFNASFVTTV  
YMLSNGLPVLLAHPEVAAALATDPVLTAGAVDEILRLQAPVHLLARAAPR  
DTVLGGVPI PQGQNVLLLVA AANRDP AHFPDPDRFDPWRSGPPSLAFGLG  
LHYCLGAAVSRLEGR LALPRLLSRFPRLRIMEQPVYSGSLFLRGIDKLSV  
SPGEGSTRE

>CYP125A41 (2518482640) *Salinispora arenicola* CNY231

MTEPRIPAGFDFTDPEVL AHRVPREEFAELRR TAPVWWNAQPRGSAGFDD  
DGYWVVTRYADVM TVSRSDTYSTRENTAIARLRPD TTREDIEMQRVIML  
NVDPP EHTKLRAIVSRGFTPRAINALRGSLA ERAEHIVRDAAVRGV GDFV  
TDVACELPLQAI AELIGVPQHRRKVF DWSNQLIGYDDPAYGTDPLTASA  
ELLAYAMEMA EERQ RSPSDDLVT KL VNAQIDG EHLTTDEF GFFV MLLAVA  
GNETTRNAITHGMVAF L DNPEQWELFK AERP KSAVEE IIRWATPVNVFQR  
TALVDTVLGGQAI SAGQRVALFYGSANFDEAVFEDPERFDITRSPNPHLG  
FGGSGAHFCLGANLARLEIELIFNSIADHLPDIRKVAAPQRLRSGWINGI  
RQMPVRYR

>CYP244A4 (2518482859) *Salinispora arenicola* CNY231

MSTTTNTELTEAPETNMPVD PGLFDCMPDLIAAARVAPVVRIPYLGRHAW  
VVC DREL VKQAL THPKMGKDIALVPEWMRQPGLMVTAQPDPEYARAMIMS  
DGENHARIRRIHAPVLS PRNTERWGERVADKVEGFLDELSQAGSGGSAEV  
NVVTNYTHKIPLAFISEMLGLPPEAEHRLRGITDIMLYSSDYAARREAIG  
GLFGAVEDWVRNPADLRDGVITGLLAASDGPDAAVTEGEVIVWTLGMIIT  
GYETTGS LISTS LYEAI RPPHERPKTDEDITAWIEETLRVHPPFPHPPTW  
RFPLEDIELGGYLIPKGAPVQVSIAAANRKPGE GADSFDAERRGHGHL SF  
GLGMHYCIGAPLVRLEAQIAVRGFLRRFPQARLSAETAVQWESEWMIRRM  
SVLP AVL S

>CYP245A7 (2518482863) *Salinispora arenicola* CNY231

MPSATLPRFALTGWSRENIVNPYPVYQRYREVASVHRGEPGGDAPDTFYV  
FSYDEVVQVLSSNCFGRGRSLDAAKASVPVP AEQKALRAIVENWLVFMDP  
PRHTELRSLLNRSFS PRIVTEL RPRIARIAQELLSRLGQQVDVDLVESFA  
APLPILVISELLGIPEERRAWLRANALALQEASSSRAGRDVDGYAQAEVA  
AQEFTEYFREQVRLRRGRAGGDLITILANAQQRGAPVSLDAIVGTCVHLL  
TAGHETTTNSLAKAVLALREHPAVLDEL RGA EGLTTDAVEEF LRYDPPVQ  
AVTRWAHQD TT LGGCDIPRGSRVALLGSANRDPARFPSPDVL DVRRPAD  
RHLSFGLGIHYCLGATLARAELEIGLQALLDGVP T LGYGTQHVDYADDLV  
FHGPSRLVLVNLGERCT

>CYP105CP2 (2518483310) *Salinispora arenicola* CNY231

MTKSMPVQDLPAFPPIPRECYPYRPSAQHVSLRSGGPMKVRLYNGRTAWLV  
TDSA HARAVLS DYRRVSIKPYHGNYPLLN EEF EKVVDSGYADVLFGVDPP  
EHTRQRQMIMPSFTLRR TAVLRPDIQRIVDDKLD EMMRHGAPGDLVTEFA  
QPVP SMVMSFLLGVPWEDHEEFETPA HKLFVPELAEEATTEL GAYLERLI  
QKKEQPGGTPGGTGLLDD LIRDHLRAGALS RDELVHIAMAMLVAGTD TTT  
NVISLGT LALLDNP DQWAALRDN PDELIPGAVEEILRYTSLIEAFARVAV  
SDIELNGAVIKEGEGILISSAGVNFDPALAPDPGRFDIRRP RPSPFSFSH  
GIHRC PGDNLARLELEIAFRSLVTRMPNLRTAKPIDQIPSNNDGTLQRL  
YELPVVW

>CYP105CN1 (2518483312) *Salinispora arenicola* CNY231

MAAPAPQATQSTTPHPPSYPLPRECYPYRPSAGTARLRDAGPVSTVRLYDG  
RTAWLV TGAAEARALLADSRVSNRADFPNYPVM DERHLSMRATREMAREE  
EGGFAAALFGMDPPEHTRQRQLLLPRFTVRQVAARRPAIQRIVDEHLDAM  
EANGSPADLVSAFATPVPTMVVCTHLGVPYQDRTRFEPAVAGLFEPDRAD  
AAMAE LTAYLHQ LIETKQSEPGDGVIDHLIANHLRPGAIDRAELVAIASA  
ILVAGTVTTSSAIALGTLALLTAPGQYAALVDNPDLPV GAVNEILRYLSL  
VEQLARVATEDIEIGGKLIRAGDGIIVSFAAGNLDPNVTTHPDRLDVALP  
PTNH LAFSHGIIHCIGQNLALLELDIAFRALVSRFPTLRLAVPAEQ LPTY  
FAGDVPRLACL PVTW

>CYP107FS2 (2518483313) *Salinispora arenicola* CNY231

MPVPQGEQNLTTTEVFADPKALFATLGS RQPLHRISLPDGM PAVLVTGNRE  
ARQALSDPRLVRSITAAAPELHKYHPLASDDYALSRHMLFADPPDHGRMR  
KLVS TAFTRRRVEQMRPRIQQITDDLIDVIAAKGEADLVETLALPLPIAV  
ISEMLGVPFADRSEFERHAEVLTGINASSGFD AIIAAGRWFDEYLAELVQ  
QRRREPQDDLISGMLAAQDKGDRLTDVELRSNALLLSAGFETT VNLVAN  
GLLALLRHPEAMAALRSEPNLMTTAVDELLRYDSPVSCV TYHF AQEPVEI  
GGFEIRSGEHV VIAAAAANHDPTVFADPSRLDLRREGSGQILSF SHGIHF  
CLGAPLARLEGEIAFGTVLRRLAGRLAVPTDSL VWKASFVLHRLERLPV  
TFTPD RAPNPIDSVHTV

>CYP248A2 (2518483376) *Salinispora arenicola* CNY231

VLADAVTAFDPTAVDVRRDPYPSYHWLLRHDPVHRGAHQVWYVS RFADVR  
AVLGDERFARTGIRRFWTDLVGPGLLSQIVGDIILFQDEPDHGRLRGVVG  
PAFSPSALRRLEPTIEATVNDLLRPARALGAMDVVADLAYPLALRAVLEL  
LGLPAGDANAVGRWSRAVGRTLDRGATAEDMRRGHAAIAEFADYVERMLA  
ERREDGADLLALMLAAHRSQ LMSRNEIVSTVVTFI FTGHETVASQLGNGL  
LSLLDHPEQLELMRRQPHLV PQAVEECLRFDP AVQSNTRQLAADVELHGR  
RLRRDDVVVVLAGAANRDPGRYARPDELDIRRDPVPSMSFGAGMRYCLGS  
YLARLQLRTALGAMVALPDLRLACSPNELAYQPR TMFRGLTRLPVAFTPA  
G

>CYP105W2 (2518483383) *Salinispora arenicola* CNY231

MTGYQDRPTGDQPGAPVPSGSTDPGIGAFPLPRRC PFSPPAEYARLRAEH  
PVVRLPMLGGDTAWVVS RHADV RQVLS DPRMSADRRRP GF PKFAPTTEGQ  
RQASFANFRPPLNWLD PPEHAICRRQIVDEF SVRRVRQSRALVERVVDTH  
LDALTAAPGADLVSTFAYPVPSQV ICEVLGVPYGEHEFFERRSTLMFRR  
STPADERARCAREIRDFLDVVVTDKERRPGDDVLSRLLYRQRRAGGVDHE  
AVVSMAFVLLVAGHVTTSNMLALS V LALLTHPARLARLRAE PERFPAAVE  
ELLRYFTVVEAATARTATAEVTIGGV TIAAGEGVVALGQAANRDP RVFEH  
PDEFDPDRDARAHLAFGYGRHICPGQH LARLEMEVALSRLFRRLPGLRLT  
MEVSDLPLKEDSNIFGLYALPVAW



>CYP107AY2 (2518483833) *Salinispora arenicola* CNY231

MTAEPTPIPRSGARLGQEYDQLRKTGDVHQVLLPDASLAWLVTNPEVAAR  
ALADPRLALNRRNSRGGWSGFALPPALDANLLNLDAPDHTRLRRLVGPAF  
SPQRVAALRPGIRRAAEHLLDTLVATSGPTDLVTGYCNPLSVQVIADLMG  
VPEAGRTNLRATDTMLTSYPPDRDAIRRAVTELHGYVVDLIDIKQQQPG  
DDLSTLVITIEQDGDRLSRDELTSALFLILFAGYENTANLIASAVLWLLD  
HGGLNVVPISEAIEATLRHEPPAPVAIRRFPTEDIIIGGV TIPAGDTVLL  
SVAAATR GADGNAARLAFGNPHYCLGAALARVEAEEALTVLARRLPGLT  
LAVPPSQVRWRPTFRTHGPAELLVGW

>CYP105CT1 (2518483864) *Salinispora arenicola* CNY231

MNSPNHMPADRSLTAPTSGCPMALSRGRVGLDVADEISELRDGGRLGRIT  
TAFGQEATLITRYDEVRAQMADSVVFNVAGVPSPPALVDGGFDTESVRRR  
RTVGNLIMLDPPEHTRLRRMVAAWFTTRRVERLRPRVVEIIDAALDEMER  
SGPPVDLVAMFAKTVPITVICELIGVPEELRERYRRRAERAVSASAVSTP  
LDELRLREAGWVSRELIEYHRENPSDDIIGMLLREHGTD SHDDGITDDE  
LVGLANALLIAGHETTTQMLSMGALALLRHPDQLALLRDDPSIVAGAVEE  
LLRYVGV LHGGFVRVATRDTRLGGHRIHAGELVVPALTVANRDPRLTDTG  
DRLDITRPPTSHVAFGHGVHFCIGAPLARMELREAFPALLRRFPGLRLAV  
PDSELEFTQGT TVYSLRGLPVTW

>CYP154M5 (2518483881) *Salinispora arenicola* CNY231

VEQSCPKLDVTGRDVHAEGEAI RARGPVAQVELPGGVQGSVTGYQAAR  
QVLADPRFAKDPKKWPAYTSGAIPPNWPLIGWLLMDNMTTNDGADHQRLR  
KLVS HGFTPRQVERTRPLIVKIVNDLLDGLSSAGPDEVVDLKGRFATPLP  
ARVICDMFGVPEALRASVLRGAQVNVTSISGEEAEANVEQWHRELLLV  
EAKREKPEDMASLLIAAKEEDGSTLTQEEVVGTLHLMLGAGSETLMNAL  
SYAVLGMLSNPGQYEMVRNGTSSWDDVIEETLRAQAPVAQLPLRYATEDV  
AVGGAVIKAGDPVLMGFTAIGRDP AVHGETAGDYDITREDKTHLSFGHGV  
HFCLGAPLARLELKIALPALFERFPNMTLAVRPDQLEPQGT FIMNGHREL  
PVRLGQPATVLA

>CYP208A12 (2518484011) *Salinispora arenicola* CNY231

MTLDTITPRVPLGPPTAALRMLLV MKRDRLGMLTSAAARYGDASRLPVG  
HKALWFFNHPRYAKHV LADNSANYHKGIGLVHARRALGDGLLTSEGD LWR  
KQRKVIQPAFQSRRIAQQAGMIAEEAFALVERLRARAGAGPV ELTAE L TG  
LTLGVLGRSLLDADLAGFDSIGDSFATVQDQAMFELET LNAVPMWIPLPR  
QIRFRARRRKLQAVVDTLVDGRAGNLADRVDVLSRLILSARGEADPRVGR  
ERLRDELVTLLLAGHETTASTLGWTL SLIDRHPGVWERLHAEAVEVLGDR  
LPEYDDLRLRLRYTVMVVEEAMRLFPPVWLLPRRALAPDTIGEYRVPANAD  
VVISPYTLHRHPEFWPNPERFDPERFAPGQAADRPRYAYLPFGAGPRFCV  
GNNLGMMEAVFVIALLCRHLRLTGVPGYRLVPEPMLSLRIRGGLPLVVRP  
VS

>CYP107Q4 (2518484089) *Salinispora arenicola* CNY231

MTTTAETS AETIDLFSPEVVADPFGWYARLREETGPTTGTLNIGTMMGGP  
EMWLVTTRYEDVRQVLTDPRFLTNP PADSPLEDIRAGVFKRLDFPPDLIPW  
MANLLNVSDGEDHTRLRKLVSYALTAHRIGKLRPRVEKITADLLDKLAED

GKDGSPVDLVEEYCYPLPVTVICELVGIDEPDRPHWRAWGDSMATMNGER  
IPTTLVKCIELARELIAKRRAEPQDDLVLTALVQAQAEQNRVSDDEIIGI  
LFSLVTAGHQTTTYLIGNSVILLLENPDQLARLKENPSMWPQAVRELQRL  
GPIQFAQPRFPSEDIELGGVTIPRGAPVAPLLLAANTDPRRFPDPNKLI  
DRLAVGSEHGLGFGKGIHRCLGQHLAYQEAEEVALQGLFTRFPDLSLAVPR  
EEIPWILRPGFTRTRTLPLKLV

>CYP105G5 (2518484090) *Salinispora arenicola* CNY231

LTIETTETPPADDSLRAPLPRQFMQRDDPSKLPALAAAEQSPVGRSTL  
PDGDPFWMVSGYDEARAVLSDPRFSSDRFRYHPRFKKLSGQLGERLRNDK  
ARAGSFINMDPPEHTRYRKLLTGQFTVRRMRQLTVRIEQIVTEQVDVMLA  
EGNSADLVSAFAVPVPSLMICELLGVRYEDRTEFQRRRAAGLLQTDLPKQ  
AVENLEAQRAFMQRLVTDKRRTPADDMISGLVHHAGAEPPLTDDELVGIA  
TLLLFAGLDTTASMLGLGMFMLLQRPEQMAVLRDDPSRIGDAVEELLRYL  
TVVSTGLFRFAKEDVVLGDEHIPAGSTVVVSLMAANRDGRHWPEPETLDV  
TRVRSSHLAFGHGVHQCLGQQARIELTVGITELLRRLPNVRLAVPPADV  
PLRNDMITYGVHRLPILWDTP

>CYP1051A1 (2518484115) *Salinispora arenicola* CNY231

MATDAAITRARTVPAWKALPAAVRDTHRAFVDVGNWSDGDVVRVSLGVSR  
PYLVTNPAHVQEVLEHERAAIYPRGDDTALWRSVRKLVGDGILAEGDAWAA  
SRRVLAPMFRPARINAMVDTMADAIAGAIDDLHGAATAGTPIDVGRELSR  
IVCSAIMRVFFADRITVRDALRIMKAQETIVTAMAPRILAPLVPWWIPMP  
GDRRFRAAVRSIDILLPVLQRQAQRQPDGDDLLSRLVHARADDGRALSE  
KMRDDLVSMVAVTTETSTVVLTWLWPLLANHPDVANRLYDEIDRVVGGG  
PVRGDHLAELTYTRMVLDELLRLYPAGWILPRRAATTDVLGGVRINKGAT  
VILSPYVTQRMATAWWGPTAEAFDPERFAAGREAADGRHRYAYYPFGVGMH  
RCLGEHLFNLEAILIVATLLSRFRFELTDTSMPGVKVAASRPARTVEMI  
LKPVPAPVPAR

>CYP105AB8 (2518484447) *Salinispora arenicola* CNY231

MTETASSRLTDTEFPVQRECPFAEPVEYEQIREQSSIAMVRLTGGGEAWW  
ISGHEQGRAVLADRRFSSDRKANFPFVSTDPAIRKRLHAQPLSLISMDG  
AEHTQARRALIGEFTVRRLAALRPRIQQIVDQCIDEMLTDDQHRADLVKT  
LSLPVPSLVICELLGVYPADHDFQEHATLVRRTASEVRQHSIDELNA  
YLGALIDRKLASPDLLGRQIARQHRDGTFRSSMVSLAFLLLVAGHET  
TANMISLGVVGLLQHPEQLAMIKDDPKTPLAIEELLRFFTIVDSVTSRV  
ATEDVRFGDTTINAGDGVVVSGLSADWDPTVFADPDRLDLERGARRHHLAF  
GFGPHQCLGQNLARLELQIVFDTLFRHRIPTLRLAAPLDKIPFKTDAAIYG  
ARELPVAW

>CYP105J3 (2518484615) *Salinispora arenicola* CNY231

MTDSVAFFQGRVCPHQAPAGYRPLAVQRPLAQVTLYDGRRVWAVTTRDLA  
RRLLVDPRISSDRNTNPAWPAIVPIVAAAVNDAQQKVLKIATALVGTGPE  
HKAQRKMLIPSFTFRMNALRPMIQEIVDQQLEMIKSGAPTDLIPAFAS  
AVPVTVLYRLMGIPDDDHGIFEKLSHQLLAGPNANEAYDQLMGYMSRLIA  
ERRRNPGEGLVDDLAAQHGANDDADHDELVSTLVVQVAGNHGTTGSMIAL  
GLFALLQHPEQLAELRADPSLMPTAVDELLRFLSVPDVAVTRLAADDIEVE  
GTIIRKGDGVFFITSLINRDTDVHDAPNSLGWHHASAADHLTFGFGAHQC  
LGQSLARITMEIALGALIDRLPSLRLAVPAEEVPFLPAASLQVIAELPIT  
W

>CYP247A7 (2518485033) *Salinispora arenicola* CNY231

VRLTPGAARDIDLDSVNLFDLDLYTSGDPHPFIWDVMRAQSPLHHQVLADG  
REFWSVTRYDDVCRVLGDYREFTSERGTVVTHLGEDDIAAGKLLTSTDPP  
RHTQVRRRAIGAKLTARAVASWQDRIRDAIVRFLEPALDGDTFDLAEQALL  
LPAIVTGPLLGIPELDWQELVQLTAMVTAPSDPHFQHGSEAATLAISHHE  
LVITYVTEWVKQRRSAGGGDGSLLDHLMSVRVGGAPLTDEEIALDGYSILL  
GANVTTTPHTVSGTVLALIERPEQFEKAQADPSLLANLVEEGLRWASAACN  
FMRYAVNDTRIGGGTVPAGGAVVAWIGSANRDESYFPDPHQFDITRSGAN  
RQVAFGFGPHYCIGAPLARMTLGIFFEELVQRFGSIELAGEPQHLSYFI  
AGMTHLPIVAQKRKTP

>CYP105CH1 (2518485248) *Salinispora arenicola* CNY231

VSSLPLPTYPKLRDPADPLLPAPAEYLAIQSEKPIAKVLLPSGRPTWLITG  
HALARQVLTEPCVSVDRRHPNFPYPVPNPDAVVAQVARWTYILLGDDPPL  
HTERRRLLI SEFTVRQAQAMRPRIQQLVDFHLEQLIAAGPGADFSKHFAM  
QVPSAVICEMLGVPFADHDYFQERTALQLRRDVPVAAQKQAIDELLAYFE  
QLIQEKSSHPGDDVLSRLIVSNRETEAFDHEALVALGLLLLLVGGHETTAN  
TLTLATATMLERPEIAEQLRDTPSLMPSAVEEFLRYFSVAVAVSRIATAD  
LQVGGQLVRAGESMLLVNLTARDGTVPFEPHRLDIRRNARNHLAFSHGI  
HQCMGQNLARVEMQIALDTVLRLPGLHLVTPFEELPFKYRHLVWGIEEL  
RVAV

>CYP107EU1 (2518485490) *Salinispora arenicola* CNY231

VTIGQTLPLDVYSPEFTRDPYAI FARLREQAPVCRVTTHRGMSAWMVTRH  
ADVRALLADNRLAKDGNRIGELMPRHSTLTGAATGFPPGLTTNMVNSDPP  
DHTRLRLHLVGREFTGHRVEGLRPRIEEIVDDLLDGVAACGDEADLAETLA  
RRLPIAVIGELLGVPEADRAEFFRWADTLYGGTASPEALGQAYNAIVDYL  
GRLCDAKRDPADDLLTALVQVSADEDRLSREELVSMALLLVAGHETTS  
KQISNGVLALLLNPEQLKLLKAQPARTAGAVEELLRFEGPSLSASLRFTT  
EPVEVAGVVIPEGEFVLLSLASGNRDPEKFPDPDRDLITRSTQGNLAMGH  
GIHHCVGAALARLELEIVLSRLVARFPQMQLAVEADDLEWLVNSFFRAPL  
HLPVSLRR

>CYP1198B1 (2518486132) *Salinispora arenicola* CNY231

MSGELTDQRTAPGAGGNPLRSLMDHGIRANPYPLFGELREAGPTAVEDGS  
VVLFGHEYEHCSQILRHRDMGSDTSEAPSIKGFVVDDAERAGSSIFFMDQP  
GHGRQKRLVSKSFTPRIVKSFGPQITHIVDGLFEDFRDKGELDVVTDLAY  
PVSIGIICDLFGIPDDERDMLKEWSDDLALSTELPTLGAAIGVLNVFTRD  
EINRFGSVMAAHAYFADLIHRRRNKPNPGDDLVSLLATESNGERLTRFEV  
TSVLATLFVAAHESTNNLISGGILALLRNQDQMAVLRENPGELITNVDES  
LRYDPPVHLAARMARARTTIGGYDLDPGTIVVVLMAAGNRDPRAYENPDV  
FDVNRKIRNVSLAFGAGAHFCIGSGLAKLEAEIAISAFQAQRLKHPEVDES  
SLEYRRHIVVRGLEHMKVSFQP

>CYP105BL2 (2518464025) *Salinispora arenicola* CNS744

MSSHSAAPDPETATPLHTLAPELTFPQFERSTPFDPPQAYTELSGRCPV  
APVSMADGKPSWLITSFEGVRTTSLDPRFSSDMSHPGFNRTGKPVDDL  
KDTLGAMDGERHRYRRLTGELTVRRAKAMRPVITQITDEALDQLAAAG  
PGADLVKHVAFVVP SRVACHLVGIPLSDYELFTGMAATLMDSTSSDDQFA  
ALQNMVSYFDTLVTDREHHDRDDLGHMVRRYLATGELTRDMLIRLAWTT  
MAAGQETTAHMI GLGVAALLRHPDQLELLRREPHLLPGAVDELMRYLPLI  
QFGIPRVAMDDVEVDGQTVTAGEGVVALPPLANRDPVFERPDELDVRRN  
ARQHLTFGYGPHQCPAHALARLELEVYGRLLERFPTLRLADSDADLKVQ

DKDIMYRVSELAVTW

>CYP166A4 (2518464405) *Salinispora arenicola* CNS744

MTDAISFELPWARTDKFDPPAVFDALREQRPLARMRYPDGHVGVIVSSYE  
LVREVLGDPRFSHSCAVGHFPVTHQGQVIPTHPQIPGMFIHMDPPEHTRY  
RRLLTGEFTVRRTSRLTGHERVATEQIEVMRGGHAPADLVATFARPLVL  
RVLSGLVGLPYGERDRYLHAVTLLHDAEADPAEAAAAAYEQAGAYFDEVIE  
RRRRQPEDDLISTLVGDGELTGEELRNIVTLLLFAGYETTESALAVGMFA  
LLHHEDQLARLRADPTKIDAAIEELLRYLTVNQYHTYRTASEDIELHGEV  
INKGDSVTVSLPAANRDPARFACPAELDIDRETSGHVAFGFGIHQCLGQN  
LARVELRAGLSALLRAFPNLRRLAVPADEVPLRLQGSVFAVKNLPVCW

>CYP125A41 (2518464899) *Salinispora arenicola* CNS744

MTEPRIPAGFDFTDPEVLAHRVPREEFAELRRTAPVWWNAQPRGSAGFDD  
DGYWVVTRYADVMTVSRDSDTYSTRENTAIARLRPDTTREDIEMQRVIML  
NVDPPPEHTKLRAIVSRGFTPRAINALRGSLAERAHIVRDAAVRGVGDV  
TDVACELPLQAI AELIGVPQHHRKVFWDWSNQLIGYDDPAYGTDPLTASA  
ELLAYAMEMAERQRSPSDDLVTCLVNAQIDGELTDEFGFFVMLLAVA  
GNETTRNAITHGMVAFLDNPEQWELFKAERP KSAVEEII RWATPVNVFQR  
TALVDTVLGGQAI SAGQ RVALFYGSANFDEAVFEDPERFDITRSPNPHLG  
FGGSGAHFCLGANLARLEIELIFNSIADHLDPDIRKVAAPQRLRSGWINGI  
RQMPVRYR

>CYP211C1 (2518465048) *Salinispora arenicola* CNS744

VVDVEELLTRLYSAQGRQDPFPVYADLHAQGPIAALPPEPERRRVA AVAV  
GYDLVGAVLRDPEWSKAPPPGWTEQEILRTLQTSMMFINPPDHGRMRHVF  
AGTFTPRRLGALEPVVNRVADELDRMADAGAGGLDFVAEFAYPLPARVM  
AEFIGIPETELDWYRERVDVIDAFLDVAGKTPQRLAAANAAGAE LRAFYG  
ELLARRRRTPGEDLISGLVEAVDAGGVELTEDELVSNLIVLFNASFVTTV  
YMLSNGLPVLLAHPEVAAALATDPVLTAGAVDEMLRLQAPVHLLARAAPR  
DTV LGGVPI PQGQNVLLLI AAANRDP AHFPDPDRFDPWRS GPPSLAFGLG  
LHYCLGAAVSRLEGR LALPRLLSRFPRLRIMEQPVYSGSLF LRGIDKLSV  
SPGEGSTRE

>CYP211B2 (2518465135) *Salinispora arenicola* CNS744

MDVSEAI AVLISPSGR LDPYPTYEQ LRAHG PVSRTTAGLFVVTGYAEADM  
VLRDPRFVVLDDDLRDDVFPHWQDSPAIXIARSMLRTNPPDHSRIRRLA  
AGAFTPRRVAAMREV VTAQADELVDEMIRAGRDGARVDFMDMFAYPLPVA  
VICALLGVPAADRSRFRRWAGDLTGILEPEITPEELAGADAGADELRDYF  
TGLIEQRRRAPADDLTALVQAHDADGDRLSGEELLANLVVLLVAGFETT  
TNLLGNGLVLLTRPEAAAALRDEPDLAPGYVDELLRYDSPVQLTTRTVR  
ESVSFAGTELPADSWLLVLLGAANRDPRRFDPARFDPGRAQSQPLSFGA  
GPHYCLGAGLARLEAQVAFPLLLRRLPELALAGRPSRRTRLTLRGYETLP  
ITVGAVTADRGT PAGVAPGTP

>CYP244A4 (2518465784) *Salinispora arenicola* CNS744

MSTTTNTELTEAPETNMPVDPGLFDCMPDLIAAARVAPVVRIPYLGRHAW  
VVCDELVKQAL THPKMGKDIALVPEWMRQPGLMVTAQPDPEYARAMIMS  
DGENHARIRRIHAPVLSRPNTERWGERVADKVEGFLDELSQAGSGGSTEV  
NVVTNYTHKIPLAFISEMLGLPPEAEHRLRGITDIMLYSSDYAARREAIG

GLFGAVEDWVRNPADLRDGVITGLLAASDGPDAAVTEGEVIVWTLGMIIT  
GYETTGSLISTSLYEAIRRPPHERPKTDEDITAWIEETLRVHPPFPHTW  
RFPLEDIELGGYLIPKGAPVQVSIAAANRKPGEAGDSFDAERRGHGHLSE  
GLGMHYCIGAPLVRLEAQIAVRGFLRRFPQARLSAETAVQWESEWMIRRM  
SVLPAVLS

>CYP245A7 (2518465788) *Salinispora arenicola* CNS744

MPSATLPRFALTGWSRENIVNPYPVYQRYREVASVHRGEPGGDAPDTFYV  
FSYDEVVQVLSSNCFGRGRSLDAAKASVPVPAEQKALRAIVENWLVFMDP  
PRHTELRSLNRSFSPIRVTELRPRIARIAQELLSRLGQQVDVDLVESFA  
APLPILVISELLGIPEERRAWLRANALALQEASSSRAGRDVDGYARAEVA  
AQEFTEYFREQVRLRRGRAGGDLITILANAQERGAPVSLDAIVGTCVHLL  
TAGHETTTNSLAKAVLALREHPAVLDELRGAEGLTTDAVEEFLRYDPPVQ  
AVTRWAHQDCTLGGCDIPGRSRVVALLGSRNDRPARFSPDVLVRRPAD  
RHLSFGLGIHYCLGATLARAELEIGLQALLDGVPTLGYGTQHVDYADDLV  
FHGPSRLVLVNLGERCK

>CYP107AY2 (2518465889) *Salinispora arenicola* CNS744

MTAEPTPIPRSGARLGQEYDQLRKTDGVHQLLPDTSALWLVNPEVAAR  
ALADPRLALNRRNSRGGWGFALPPALDANLLNLDAPDHTRLRLRVGPFAF  
SPQ RVAALRPGIRRAAEHLLDTLVATSGPTDLVTGYCNPLSVQVIADLMG  
VPEAGRNTLRAWTDMLTSYPPDRDAIRQAVTELHGYYVDLIDIKQQQPG  
DDL SALVTIEQDGDRLSRDELTSALFLILFAGYENTANLIASAVLWLLD  
HGGLNVVPSSEAIEGTLRHEPPAPVAIRRFPTEDIIGGV TIPAGDTVLL  
SIAAATRGADGNAARLAFNGPHYCLGAALARVEAEEALTVLARRLPGLT  
LAVPPSQVRWRPTFRTHGPAELLVGW

>CYP105CP2 (2518466380) *Salinispora arenicola* CNS744

MTKSMPVQDLPAFPIPRECPYRPSAQHVSLRSGGPMKVRLYNGRTAWLV  
TDSA HARAVLS DYRRVSIKPYHGNYPLLNEEFKVVDSGYADVLFVDP  
EHTRQRMIMPSFTLRRTAVLRPDIQRIVDDKLDMMRHGAPGDLVTEFA  
QPVP SMVMSFLLGVPWEDHEEFETPAHKLFVPELAEAEATTEL GAYLERLI  
QKKEQPGGTPGGTGLLDDLIRDHLRAGALSDELVHIAMAMLVAGTDTT  
NVISLGLTALLDNPQWAALRDNPDDELIPGAVEEILRYTSLIEAFARVAV  
SDIELNGAVIKEGEGILISSAGVNFDPALAPDPGRFDIRRPPRPSFSFSH  
GIHRCPGDNLARLELEIAFRSLVTRMPNLR TAKPIDQIPSNNDGTLQRL  
YELPVVW

>CYP105CN1 (2518466382) *Salinispora arenicola* CNS744

MAAPAPQATQSTTPHPPSYPLPRECPYRPSAGTARLRDAGPVSTVRLYDG  
RTAWLV TGAAEARALLADSRVSNRADFPNYPVMDERHLSMRATREMAREE  
EGGFAAALFGMDPPEHTRQRLQLLPRFTVVRQVAARRPAIQRIVDEHLDAM  
EANGSPADLVSAFATPVPTMVVCTHLGVYPYQDRTRFEPVAVAGLFEPDRAD  
AAMAE LTAYLHQ LIETKQSEPGDGVIDHLIANHLRPGAIDRAELVAIASA  
ILVAGTVTTSSAIALGTLALLTAPGQYAALVDNPDLPV GAVNEILRYLSL  
VEQLARVATEDIEIGGKLIRAGDGIIVSFAAGNLDPNVTHPDRLDVALP  
PTNHLAFSHGIIHCIGQNLALLELDIAFRALVSRFPTLRLAVPAEQLP  
TYFAGDVPRLACLPTVW

>CYP107FS2 (2518466383) *Salinispora arenicola* CNS744

MPVPQGEQNLTTTEVFADPKALFATLGSRQPLHRISLPDGMFAVLVTGNRE  
ARQALSDPRLVRSITAAAPELHKYHPLASDDYALSRHMLFADPPDHGRMR  
KLVSTAFTRRRVEQMRPRIQQITDDLIDVIAAKGEADLVETLALPLPIAV  
ISEMLGVPFADRSEFERHAEVLTGINASSGFDALIAAGRWFDEYLAELVQ  
QRRREPQDDLISGMLAAQDKGDRLTDVELRSNALLLSAGFETTIVNLVAN  
GLLALLRHPEAMAALRSEPNLMTTAVDELLRYDSPVSCVTYHFAQEPVEI  
GGFEIRSGEHVVIAAAAANHDPTVFADPSRLDLRREGSGQILSFSGIHF  
CLGAPLARLEGEIAFGTVLRRLAGRLAVPTDSLWVKASFVLHRLERLPV  
TFTPDRAFPNIDSVHTV

>CYP248A2 (2518466444) *Salinispora arenicola* CNS744

VLADAVTAFDPTAVDVRDPYPSYHWLLRHDPVHRGAHQVWYVSRAFADVR  
AVLGDERFARTGIRRFWTDLVGPGLLSQIVGDIILFQDEPDHGRLRGVVG  
PAFSPSALRRLEPTIEATVNDLLRPARALGAMDVVADLAYPLALRAVLEL  
LGLPAGDANAVGRWSRAVGRTLDRGATAEDMRRGHAAIAEFADYVERVLA  
ERREDGADLLALMLAAHRSQILMSRNEIVSTVVTFIFTGHETVASQLGNGL  
LSLLDHPEQMELMRQPHLLPHAVEECLRFDPVQSNTRQLAADVELHGR  
RLRRDDVVVVLAGAANRDPGRYDRPDELDIRRDPVPSMSFGAGMRYCLGS  
YLARLQLRTALGAMVALPDLRLVCSPNELAYQPRTMFRGLTRLPAFTPA  
G

>CYP105W2 (2518466452) *Salinispora arenicola* CNS744

MTGYQDRPTGDQPGAPVPSGSTDPGIGAFPLPRRCFFSPPAEYARLRAEH  
PVVRLPMLGGDTAWVVSRHADVRQVLSDPMSADRRRPGFPKFAPTTEGQ  
RQASFANFRPPLNWLDPPEHAICRRQIVDEFVRRVRQSRALVERVVDTH  
LDALTAAPGADLVSTFAYPVPSQVICEVLGVPYGEHEFFERRSTLMFR  
STPADERARCAREIRDFLDMVVTDKERRPGDDVLSRLLYRQRRAGMDHE  
AVVSMAFVLLVAGHVTTSNMLALSVLALLTHPARLARLRAEPPERFPAAVE  
ELLRYFTVVEAATARTTTAEVTIGGVTTAAGEGVVALGQAANRDPRVFEH  
PDEFDPDRDARAHAFGHGRHICPGQHLARLEMEVALSRLFRRLPGLRLT  
MEVSDLPLKEDSNIFGLYALPVAW

>CYP105AB8 (2518466972) *Salinispora arenicola* CNS744

MTETASSRLTDTEFPVQRECPFAEPVEYEQIREQSSIAMVRLTGGGEAWW  
ISGHEQGRAVLADRRFSSDRKANFPFVSTDPAIRKRLHAQPLSLISMDG  
AEHTQARRALIGEFTVRRLAALRPRIQQIVDQCIDEMLTDDQHHLVKT  
LSLPVPSLVICELLGVYPYADHDFQEHATLVRRNTASEVRQHSIDELNA  
YLGALIDRKLASPDDDLGRQIARQHRDGTFRSSMVSLAFLLLVAGHET  
TANMISLGVVGLLQHSEQLAMIKDDPKTPLAIEELLRFFTIVDSVTSRV  
ATEDVRFGDTTINAGDGVVVVSGLSADWDPTVFADPDRLDLERGARHHLAF  
GFGPHQCLGQNLARLELQIVFDTLFRHRIPTLRLAAPLDKIPFKTDAAIYG  
ARELPVAW

>CYP154M5 (2518467172) *Salinispora arenicola* CNS744

VEQSCPYKLDVTGRDVHAEGEAIARARGPVAQVELPGGVQGWSVTGYQAAR  
QVLADPRFAKDPKKWPAYTSGAIPPNWPLIGWLLMDNMTNDGADHQRLR  
KLVSHGFTPRQVERTRPLIVKIVNDLLDGLSSAGPDEVVDLKGRFATPLP  
ARVICDMFGVPEALRASVLRGAQVNVTSISGEEAEANVEQWHRELLELV  
EAKREKPEDMASLLIAAKEEDGSTLTQEEVVGTLHMLGAGSETLMNAL  
SYAVLGMLSNPGQYEMVRNGTSSWDDVIEETLRAQAPVAQLPLRYATEDV  
AVGGAVIKAGDPVLMGFTAIGRDPVHGETAGDYDITREDKTHLSFGHGV  
HFCLGAPLARLELKIALPALFERFPNMTLAVRPDQLEPQGTTFIMNGHREL  
PVRLGQPATVLA

>CYP105CT1 (2518467189) *Salinispora arenicola* CNS744

MNSPNHMPADRSLTAPTSGCPMALSRGRVGLDVADEISELRDGGRLGRIT  
TAFGQEATLITRYDEVRAQMADSVVFNVAGVPSPPALVDGGFDTESVRRR  
RTVGNLIMLDPEHTRLRRMVAAWFTTRRVERLRPRVVEIIDAALDEMER  
SGPPVDLVAMFAKTVPITVICELIGVPEELRERYRRRAERAVSASAVSTP  
LDELRLREAGWVSRELIEYHRENPSDDIIGMLLREHGTDSDHDDGITDDE  
LVGLANALLIAGHETTTQMLSMGTLALLRHPDQLALLRDDPSIVAGAVEE  
LLRYVGV LHGGFVRVATRDTRLGGHRIHAGELVVPALTAANRDPRLTLDG  
DRLDITRPPTSHVAFGHGVHFCIGAPLARMELREAFALLRRFPGLRLAV  
PDSELEFTQGTTVYSLRGLPVTW

>CYP107Q4 (2518467215) *Salinispora arenicola* CNS744

MTTTAETS AETIDLFSPEVVADPFGWYARLREETGPTTGTLNIGTMMGGP  
EMWLVTTRYEDVRQVLTDPRLTNPPADSPLEDIRAGVFKRLDFPPDLIPW  
MANLLNVSDGEDHTRLRKLVSALT AHRIGKLRPRVEKITADLLDKLAED  
GKDGSPVDLVEEYCYPLPVTVICELVGIDEPDRPHWRAWGDSMATMNGER  
IPTTLVKCIELARELIAKRAEPQDDLVTALVQAQAEQNRVSDDEIIGI  
LFSLVTAGHQTTTYLIGNSVILLLENPDQLARLKENPSMWPQAVRELQRL  
GPIQFAQPRFPSEDIELGGVTIPRGAPVAPLLAANTDPRRFPDPNKLI I  
DRLAVGSEHGLGFGKGIHRC LGQHLAYQEA E VALQGLFTRFPDLSLAVPR  
EEIPWILRPGFTRTRTLPLKLV

>CYP105G5 (2518467216) *Salinispora arenicola* CNS744

LTIETTETPPADDSLAPLPRQFMQRDDPSKLPALAAAEQSPVGRSTL  
PDGDPFWMVSGYDEARAVLSDPRFSSDRFRYHPRFKKLSGQLGERLRNDK  
ARAGSFINMDPPEHTRYRKL LTGQFTVRRMRQLTVRIEQIVTEQVDVMLA  
EGNSADLVSAFAVPVPSLMICELLGVRYEDRTEFQRR AAGLLQTDLP IKQ  
AVENLEAQRAFMQRLVTDKR RTPADDMISGLVHHAGAEPPLTDDELVGIA  
TLLL FAGLDTTASMLGLGMFMLLQRP EQMAVLRDDPSRIGDAVEELLRYL  
TVVSTGLFRFAKEDAVLGDEHIPAGSTVVVSLMAANRDGRHWPEPETLDV  
TRVRSSHLAFGHGVHQCLGQQ LARIELTVGITELLRRLPNVRLAVPPADV  
PLRNDMITYGVHRLPILWDTP

>CYP1051A1 (2518467241) *Salinispora arenicola* CNS744

MATDAAITRARTVPAWKALPAAVRDT HRAFVDVGNWSDGDVVRVSLGVSR  
PYLVTNPAHVQEVLHERAAIYPRGDDTALWRSVRKLVGDGILAEGDAWAA  
SRRVLAPMFRPARINAMVDTMADA IAGAIDDLHGAATAGTPIDVGRELSR  
IVCSAIMRVFFADRITVRDALRIMKAQETIVTAMAPRILAPLVPWWIPMP  
GDRRFRAAVRSID DILLPVL RQAQRQPDDGDDL SRLV HARADDGRALSE  
KMRDDLVSMAVVT TETSTVVL TWLWPLL ANHPDVANRLYDEIDRVVGGG  
PVRGDHLAELTYTRMVLDELLRLYPAGWILPRRAATTDVLGGVRINKGAT  
VILSPYVTQRM TTWWGPTAEAFDPERFAAGREAADGRHRYAYYPFGVGMH  
RCLGEHLFNLEAILIVATLLSRFRFALTDTSMPGVKVA ASTRPARTVEMV  
LKPVAPVPAR

>CYP208A12 (2518467422) *Salinispora arenicola* CNS744

MTLDTITPRVPLGPPRTAALRMLLVMKRDRLGMLSSAAARYGDASRLPVG  
HKALWFFNHPRYAKHVLADNSANYHKGIGLVHARRALGDGLLTSEGDLWR  
KQRKVIQPAFQSRRIAQQAGMIAEEAFALVERLRARAGAGPVELT AELTG  
LTGLV LGRSLLDADLAGFDSIGDSFATVQDQAMFELET LNAVPMWIPLPR  
QIRFRARRRKLQAVVDTLVDGRAGNLADRVDVLSRLILSARGEADPRVGR  
ERLRDELVTLLLAGHETTASTLGWTL SLIDRHPGVWERLHAEAVEVLGDR  
LPEYDDLRLRLRYTVMVVEEAMRLFPFVWLLPRRALAPDTIGEYRVPANAD

VVISPYTLHRHPEFWPNPERFDPERFAPGQAADRPRYAYLPFGAGPRFCV  
GNNLGMMEAVFVIALLCRHLRLTGVPGYRLVPEPMLSLRIRGGLPLVVRP  
VS

>CYP1005A1 (2518467552) *Salinispora arenicola* CNS744

VSAVLFRSWTKTAGTRWPDVTRVADQSGTEHLVVTRHALVRQVLTDQATY  
RPDNALAEAVTPVPVAAALRVLAGHRFRLPPTLANNGGASHPAIRALVADAL  
HPTKVAAQRPWLTGLVADRVASIRTTLDSGGPVDLYADLTADLPLLVLAR  
LVLELPDAPVNAVQKFARAALELFWAPLDADRQLALADEVGRFHQVLRIFA  
DTGGGLAAALRATGHSPDVLVGALFFLLVAGQETTSQFLTLLHRLSGEP  
TIRAALRAGSSSVADVVEEGLRLEPPIVTWRRVAAVDSTLGGTTVAAGTS  
VLLWLARAGRDPVVAAPDEFPRPGQRGSRRHLAFGAGAHRCCLGDQLARME  
AAVVVEQATPLLDGVTVVRPPWYPDNLTFRMPDAFVVR

>CYP107GU2 (2518468343) *Salinispora arenicola* CNS744

MSSTSTTDLPAPFPIPSFPGEPPAAAFARLREEEPVARVRLPTGDEAWLVT  
GHAENRIVLTDARFSRAAAAAAPGAPRLQPIPPDPGSMNMDPPEHTRLRR  
LVGPAFTPRRIEDLRSALRRDVDALLDEMLAAGPPADLVAGFARRLPVAV  
ICELLGVPGPDRRRITEWVDLLSLTTHPPQVRVAGARREMKAYLAGLVRA  
TRERPSDGLLSRVIEAYDESGGTDDEEVVMLAATILTGGFLTAGEIALS  
VLTLLRHPEQLATLRREPETLPGAVEELLRYNVLTGGGLIRVATEDVPL  
GGVTIRAGEAVLPAISANRDPRVHDDPDVLDFRRPDPNPHITFGLGVHYC  
LGARLARIELEEALAGVLRRLPPTLHLASDVTALAVHPGHLVRGLPELPV  
TW

>CYP105CH1 (2518468468) *Salinispora arenicola* CNS744

VSSLPLPTYPKLRDPADPLLPAPAEYLAIQSEKPIAKVLLPSGRPTWLITG  
HALARQVLTEPCVSVDRRHFNFPYPVNPDAVVAQVARWTYILLGDDPPL  
HTERRRLLI SEFTVRQAQAMRPRIQQLVDFHLEQLIAAGPGADFSKHFAM  
KVPSAVICEMLGVPFADHDYFQERTALQLRRDVAVAAQKQAIDELLAYFE  
QLIQEKSSHPGDDVLSRLIVSNRETEAFDHEALVALGLLLLLVGGHETTAN  
TLTLATATMLERPEIAEQLRTPSLMPSAVEEFLRYFSVAVAVSRIATAD  
LQVGGQLVRAGESMLLVNLTARDGTVFPEPHRLDIRRNARNHLAFSHGI  
HQCMGQNLARVEMQIALDTVLRRLPGLHLVTPFEELPFKYRHLVWGIEEL  
RVAW

>CYP105J3 (2518468597) *Salinispora arenicola* CNS744

MTDSVAFPQGRVCPHQAPGYRPLAVQRPLAQVTLYDGRRVWAVTTRDLA  
RRLLVDPRISSDRTNPAWPAIVPIVAAAVNDAQQKVLKIATALVGTGPE  
HKAQRKMLIPSFTFRMNALRPMIQEIVDQQLDDEMIKSGAPTDLIAPAFAS  
AVPVTVLYRLMGIPDDDHGIFEKLSHQLLAGPNANEAYDQLMGYMSRLIA  
ERRRNPGEGVLDDLLAQHGANDDADHDELVSTLVVQVAGNHGTTGSMIAL  
GLFALLQHPEQLAELRADPSLMPTAVDELLRFLSVPDVATRLAADDIEVE  
GTIIRKGDGVFFITSLINRDTDVHDAPNSLGWHHASAADHLTFGFGAHQC  
LGQSLARITMEIALGALIERLPSRLAVPAEEVPFLPAASLQVIAELPIT  
W

>CYP107EU1 (2518468966) *Salinispora arenicola* CNS744

VTIGQTLPLVYSPEFTRDPYAI FARLREQAPVCRVTTHRGMSAWMVTRH  
ADVRALLADNRLAKDGNRIGELMPRHSTLTGAATGFPPLTNNMVNSDPP  
DHTRLRHLVGREFTGHRVEGLRPRIEEIVDDLLDGVAACGDEADLAETLA



RRLPIAVIGELLGVPEADRAEFFRWADTLYGGTASPEALGQAYNAIVDYL  
GRLCDAKRDPVADDLLTALVQVSADEDRLSREELVSMALLLVAGHETTS  
KQISNGVLALLLNPEQLKLLKAQPARTAGAVEELLRFEGPSLSASLRFTT  
EPVEVAGVVIPEGEFVLLSLASGNRDPEKFPDPDRDLITRSTQGNLAMGH  
GIHHCVGAALARLELEIVLSRLVARFPQMQLAVEADDLEWLVNSFFRAPL  
HLPVSLRR

>CYP1198B1 (2518469105) *Salinispora arenicola* CNS744

MSGELTDQRTAPGAGGNPLRSLMDHGIRANPYPLFGELREAGPTAVEDGS  
VVLFGHEYHCSQILRHRDMGSDTSEAPSIKGFVVDDAERAGSSIFFMDQP  
GHGRQRKLVSKSFTPRIVKSFGPQITHIVDGLFEDFRDKGELDVVTDLAY  
PVSIGIICDLFGIPDDERDMLKEWSDDLALSTELPTLGAAIGVLNVFTRD  
EINRFGSVAMAAHAYFADLIHRRRKNPGDDLVSLLATESNGERLTRFEV  
TSVLATLFVAAHESTTNLISGGILALLRNQDQMAVLRENPGITNVVDES  
LRYDPPVHLAARMARARTTIGGYDLDPGTIVVVLMAAGNRDPAYESP  
FDVNRKIKNVSLAFGAGAHFCIGSGLAKLEAEIAISAFQRLKNPEVDES  
SLEYRRHIVVRGLEHMKVSFQP

>CYP208A12 (2571117093) *Salinispora arenicola* CNS342

MTLDTITPRVPLGPPRTAALRMLLVMKRDRLGMLTSAAARYGDASRLPVG  
HKALWFFNHPRYAKHVLADNSANYHKGIGLVHARRALGDGLLTSEGLDWR  
KQRKVIQPAFQSRRIAQQAGMIAEEAFALVERLRARAGAGPVELTAEITG  
LTLGVLGRSLLDADLAGFDSIGDSFATVQDQAMFELETNAVPMWIPLPR  
QIRFRARRKQLQAVVDTLVDGRAGNLANRVDVLSRLILSARGEADPRVGR  
ERLRDELVTLLLAGHETTASTLGWTLSLIDRHGPVWERLHAEAVEVLGDR  
LPEYDDLRLRLRYTVMVVEEAMRLFPPVWLLPRRALAPDTIGEYRVPANAD  
VVISPYTLHRHPEFWPNPERFDPERFAPGQAADRPRYAYLPFGAGPRFCV  
GNNLGMMEAVFVIALLCRHLRLTGVPGYRLVPEPMLSLRIRGGGLPLVVRP  
VS

>CYP125A41 (2571117374) *Salinispora arenicola* CNS342

MTEPRIPAGFDFTDPEVLAHRVPREEFAELRRTAPVWVNAQPRGSAGFDD  
DGYWVVTRYADVMTVSRSDTYSTRENTAIARLRPDTTREDIEMQRVIML  
NVDPPHEHTKLRAIVSRGFTPRAINALRGSLAERAHIVRDAAVRGVGD  
TDVACELPLQAI AELIGVPQHHRKVFWDWSNQLIGYDDPAYGTDPLTASA  
ELLAYAMEMAERQSPSDDLVTCLVNAQIDGHELTDEFGFFVMLLAVA  
GNETTRNAITHGMVAFLDNPEQWELFKAERPKSAREVEEIRWATPVNVFQR  
TALVDTVLGGQAI SAGQRFALFYGSANFDEAVFEDPERFDITRSPNPHLG  
FGGSGAHFCLGANLARLEIELIFNSIADHLPDIRKVAAPQRLRSGWINGI  
RQMPVRYR

>CYP211C1 (2571117524) *Salinispora arenicola* CNS342

VVDVEELLTRLYSAQGRQDPFPVYADLHAQGPIAALPPEPERRRVA  
GYDLVGAVLRDPEWSKAPPPGWTEQEILRTLQTSMMFINPPDHGRMRHVF  
AGTFTPRRLGALEPVVNRVADELDRMADAGAGGLDFVAEFAYPLPARVM  
AEFIGIPETELDWYRERVDVIDAFLDVAGKTPQRLAAANAAGAE  
ELLARRRRTPGEDLISGLVEAVDAGGVELTEDELVSNLIVLFNASFVTTV  
YMLSNGLPVLLAHPEVAAALATDPVLTAGAVDEILRLQAPVHLLARA  
APRDTVLGGVPIPPQGNVLLLI AAAANRDP AHFPDPDRFDPWRSGPPSLAFGLG  
LHYCLGA AVSRLEGRALPRLLSRFPRLRIMEQPVYSGSLFLRGIDKLSV  
SPGGKGVPVSEPTNRPGGGMGLHPEAEAYRAAAAAAGTPPLYTQT  
LAEARAADLAAIQAGAGAVEPVHEVRDGYVPGPDGDI PVRVYRPA  
GAGPLPTLLYFFGGGWTLSIDTADGICRRLANAVPCQVVTVGYRLA  
PEHPFPAAVHDCH

AALRHVAAHPAEFDADPERLAVGGDSAGGNLAAAVTLLARDGGPRLAAQV  
LVYPNTDQTIIEPPGGEDPLLFNRRSVTWYRSHYLADPADARHPLASPLLA  
DDLAGLPALVITAHDPLCAEGERYADRLRAAGVPTVLTRYPGMVHGFF  
AMPGTFDAGRRAQAAAATFLGTRFDRTAADDG

>CYP211B2 (2571118518) *Salinispora arenicola* CNS342

MDVSEAI AVLISPSGRLDPYPTYEQLRAHG PVSRTTAGLFVVTGYAEADM  
VLRDPRFVVLDDDLRDDVFPHWQDSPA IKS IARSMLRTNPPDHSRIRRLA  
AGAFTPRRVAAMREVVTQAQADELVDEMIRAGRDGARVDFMDMFAYPLPVA  
VICALLGVPAADRSRFRRWAGDLTGILEPEITPEELAGADAGADELRDYF  
TGLIEQRRRAPADDLTALVQAHDADGDRLSGEELLANLVVLLVAGFETT  
TNLLGNGLVVLLTRPEAAAAALRDEPD LAPGYVDELLRYDSPVQLTTRTVR  
ESVSFAGTELPADSWLLVLLGAANRDPRRFPDPARFDPGRAQSQPLSFGA  
GPHYCLGAGLARLEAQVAFPLLLRRLPELALAGRPSRRTRLTLRGYETLP  
ITVGAVTADRGTPAGVAPGTP

>CYP105W2 (2571118655) *Salinispora arenicola* CNS342

MTGYQDRPTGDQPGAPVPSGSTDPGIGAFPLPRRC PFSPPAEYARLRAEH  
PVVRLPMLGGDTAWVVS RHADVRQVLS DPRMSADRRRPGFPKFAPTTEGQ  
RQASFANFRPPLNWLDPPEHAICRRQIVDEF SVRRVRQSRALVERVVDTH  
LDALTAAPGADLVSTFAYPVPSQV ICEVLGVPYGEHEFFERRSTLMFRR  
STPADERARCAREIRDFLDMVVT DKERRPGDDVLSRLLYQQRAGGMDHE  
AVVSMAFVLLVAGHVTTSNMIALSVLALLTHPARLARLRAE PERFPAAVE  
ELLRYFTVVEAATARTTTAEVTIGGV TIAAGEGVVALGQAANRDP RVFEH  
PDEFDPDRDARAHLAFGHGRHICPGQHLARLEMEVALGRLFRRLPGLRLT  
MEVSDLPLKEDSNIFGLYALPVAW

>CYP248A2 (2571118662) *Salinispora arenicola* CNS342

VLADAVTAFDPTAVDVRRDPYPSYHWWLLRHDPVHRGAHQVWYVS RFADVR  
AVLGDERFARTGIRRFWTDLVGPGLLSQIVGDIILFQDEPDHGRLRGVVG  
PAFSPSALRRLEPTIEATVNDLLRPARALGAMDVVADLAYPLALRAVLEL  
LGLPAGDANAVGRWSRAVGRTLDRGATAEDMRRGHAAIAEFADYVERMLA  
ERREDGADLLALMLAAHRSQ LMSRNEIVSTVVT FIFTGHETVASQLGNGL  
LSLLDHPEQLELMRRQPHLVPQAVEECLRFDP AVQSNT RQLAADVELHGR  
RLRRDDVVVVLAGAANRDPGRYDRPDELDIRRDPVPSMSFGAGMRYCLGS  
YLARLQLRTALGAMVALPDLRLACSPNELAYQPR TMFRGLTRLPVAFTPA  
G

>CYP107FS2 (2571118722) *Salinispora arenicola* CNS342

MPVPQGEQNLTTTEVFADPKALFATLGS RQPLHRISLPDGMPAVLVTGNRE  
ARQALSDPRLVRSITAAAPELHKYHPLASDDYALSRHMLFADPPDHGRMR  
KLVSTAFTRRRVEQMRPRIQQITDDLIDVIAAKGEADLVETLALPLPIAV  
ISEMLGVFPADRSEFERHAEVLTGINASSGFD AIIAAGRWFDEYLAELVQ  
QRRREPQDDLISGMLAAQDKGDRLTDVELRSNALLLSAGFETT VNLVAN  
GLLALLRHPEAMAALRSEPNLMTTAVDELLRYDSPVSCVTYHFAQEPVEI  
GGFEIRSGEHVVIAAAAANHDPTVFADPSRLDLRREGSGQILSFSGIHF  
CLGAPLARLEGEIAFGTVLRRLAGRLAVPTDSL VWKASFVLHRLERLPV  
TFTPD RAPNPIDSVHTV

>CYP105CN1 (2571118723) *Salinispora arenicola* CNS342

MAAPAPQATQSTTPHPPSYPLPRECPYRPSAGTARLRDAGPVSTVRLYDG  
RTAWLVTGAAEARALLADSRVSNRADFPNY PVM DERHLSMRATREMAREE  
EGGFAAALFGMDPPEHTRQ RQLLLPRFTVRQVAARRPAIQ RIVDEHLDAM

EANGSPADLVSAFATPVPTMVVCTHLGVPHYQDRTRFEPVAVAGLFEPDRAD  
AAMAEALTAYLHQLIETKQSEPGDGVIDHLIANHLRPGAIDRAELVAIASA  
ILVAGTVTTSSAIALGTLALLTAPGQYAALVDNPDLPVGA VNEILRYLSL  
VEQLARVATEDIEIGGKLIRAGDGIIVSFAAGNLDPNVTHPDRLDVALP  
PTNHLAFSHGIIHCIGQNLALLELDIAFRALVSRFPTLRLAVPAEQQLPTY  
FAGDVPRLACLPVTW

>CYP105CP2 (2571118725) *Salinispora arenicola* CNS342

MTKSMPVQDLPAFPPIPRECYPYRPSAQHVSLRSGGPMKVRLYNGRTAWLV  
TDSA HARAVLSDYRRVSIKPYHGNYPLLNEEFKVVDSGYADVLFGVDPP  
EHTRQRQMIMPSFTLRR TAVLRPDIQRIVDDKLDMMRHGAPGDLVTEFA  
QPVPMSMVSFLLGV PWEDHEEFETPAHKLFVPELAEEATTEL GAYLERLI  
QKKEQPGGTPGGTGLLDD LIRDHLRAGALS RDELVHIAMAMLVAGTDTT  
NVISLGT LALLDNPDQWAALRDNPD ELIPGAVEEILRYTSLIEAFARVAV  
SDIELNGAVIKEGEGILISSAGVNFDPALAPDPGRFDIRRP RPSPSFSF  
GIHRC PGDNLARLELEIAFRSLVTRMPNLRTAKPIDQIPSNNDGTLQRL  
YELPVVW

>CYP244A4 (2571118944) *Salinispora arenicola* CNS342

MSTTTNTELTEAPETNMPVD PGLFDCMPDLIAAARVAPVVRIPYLGRHAW  
VVC DRELVKQAL THPKMGKDIALVPEWMRQPGLMVTAQPDPEYARAMIMS  
DGENHARIRRIHAPVLS PRNTERWGERVADKVEGFLDELSQAGSGGSTEV  
NVVTNYTHKIPLAFISEMLGLPPEAEHRLRGITDIMLYSSDYAARREAIG  
GLFGAVEDVWRNPADLRDGVITGLLAASDGPDAAVTEGEVIVWTLGMIIT  
GYETTGS LISTSLEYAIRRPPHERPKTDEDITAWIEETLRVHPPFPHP  
RFPLEDIELGGYLIPK GAPVQVSIAAANRKPGE GADSFDAERRGHGHL  
GLGMHYCIGAPLVRLEAQIAVRGFLRRFPQARLSAETAVQWESEWMIRRM  
SVLPAVLS

>CYP245A7 (2571118948) *Salinispora arenicola* CNS342

MPSATLPRFALTGWSRENIVNPYPVYQRYREVASVHRGEPGGDAPDTFYV  
FSYDEVVQVLSSNCFGRGRSLDAAKASVPVPAEQKALRAIVENWLVFMDP  
PRHTELRSLNRSFSPRIVTELRPRIARIAQELL SRLGQQVDVDLVESFA  
APLPILVISELLGIPEERRAWLRANALALQEASSSRAGRDVDGYARAEVA  
AQEFTEYFREQVRLRRGRAGGDLITILANAQQRGAPVSLDAIVGTCVHLL  
TAGHETTTNSLAKAVLALREHPAVLDELRGAEGLTTDAVEEFLRYDPPVQ  
AVTRWAHQDTTLGGCDIPRGSRVVALLGSANRDPARFPSPDVL DVRRPAD  
RHLSFGLGIHYCLGATLARAELEIGLQALLDGVPTLGYGTQHVDYADDLV  
FHGPSRLVLVNLGERCK

>CYP166A4 (2571119030) *Salinispora arenicola* CNS342

MTDAISFELPWARTDKFDPPAVFDALREQRPLARMRYPDGHVGVIVSSYE  
LVREVLGDPRFSHSCAVGHFPVTHQGQVIPTHPQIPGMFIHMDPPEHTRY  
RRLLTGEFTVRRTSRLTG HVEGVATEQIEVMREHGAPADLVATFARPLVL  
RVLSGLVGLPYGERDRYLHAVTLLHDAEADPAEAAAAYEQAGAYFDEVIE  
RRRRQPEDDLISTLVGDGELTGEELRNIVTLLLFAGYETTESALAVGMFA  
LLYHEDQLARLRADPTKIDAAIEELLRYLTVNQYHTYRTASEDIELHGEV  
INKGDSVTVSLPAANRDPARFACPAELDIDRETSGHVAFGFGI HQCLGQN  
LARVELRAGLSALLRAFPNLRLAVPADEVPLRLQGSVFAVKNLPVCW

>CYP154M5 (2571119349) *Salinispora arenicola* CNS342

VEQSCPYKLDVTGRDVAEAGEAIRARGPVAQVELPGGVQGWSVTGYQAAR  
QVLADPRFAKDPKKWPAYTSGAIPPNWPLIGWLLMDNMTTNDGADHQRLR  
KLVSHGFTPRQVERTRPLIVKIVNDLLDGLSSAGPDEVVDLKGRFATPLP  
ARVICDMFGVPEALRASVLRGAQVNVTSISGEEAEANVEQWHRELLLELV  
EAKREKPEDEDMASLLIAAKEEDGSTLTQEEVVGTLHLMLGAGSETLMNAL  
SYAVLGMLSNPGQYEMVRNGTSSWDDVIEETLRAQAPVAQLPLRYATEDV  
AVGGAVIKAGDPVLMGFTAIGRDPVHGETAGDYDITREDKTHLSFGHGV  
HFCLGAPLARLELKIALPALFERFPMNMTLAVRPDQLEPQGTFFIMNGHREL  
PVRLGQPATVLA

>CYP105CT1 (2571119366) *Salinispora arenicola* CNS342

MNSPNHMPADRSLTAPTSGCPMALSRGRVGLDVADEISELRDGGRLGRIT  
TAFGQEATLITRYDEVRAQMADSVVFNVAGVPSPPALVDGGFDTESVRRR  
RTVGNLIMLDPPEHTRLRRMVAAWFTTRRVERLRPRVVEIIDAALDEMER  
SGPPVDLVAMFAKTVPITVICELIGVPEELRERYRRRAERAVSASAVSTP  
LDELRLREAGWVSRELIEYHRENPSDDIIGMLLREHGTDSDHDDGITDDE  
LVGLANALLIAGHETTTQMLSMGTLALLRHPDQLALLRDDPSIVAGAVEE  
LLRYVGVLHGGFVRVATRDTRLGGHRIHAGELVVPALTAANRDPRLLTG  
DRLDITRPPTSHVAFGHGVHFCIGAPLARMELREAFPALLRFPGLRLAV  
PDSELEFTQGGTTVYSLRGLPVTW

>CYP107Q4 (2571119594) *Salinispora arenicola* CNS342

MTTTAETSATIDLFSPEVVADPFGWYARLREETGPTTGTLNIGTMMGGP  
EMWLVTTRYEDVRQVLTDPRLTNPPADSPLEDIRAGVFKRLDFPPDLIPW  
MANLLNVSDGEDHTRLRKLVSYALTAHRIGKLRPRVEKITADLLDKLAED  
GKDGSPVDLVEEYCYPLPVTVICELVGIDEPDRPHWRAWGDSMATMNGER  
IPTTLVKCIELARELIAKRAEPQDDLVLTALVQAQAEQNRVSDDEIIGI  
LFSLVTAGHQTTTYLIGNSVILLLENPDQLARLKENPSMWPQAVRELQRL  
GPIQFAQPRFPSEDIELGGVTIPRGAPVAPLLLAANTDPRRFPDPNKLI  
DRLAVGSEHGLGFGKGIHRCLGQHLAYQEAVALQGLFTRFPDLSLAVPR  
EEIPWILRPGFTRTRTLPLKLV

>CYP105G5 (2571119595) *Salinispora arenicola* CNS342

LTIETTETPPADDSLRAPLPRQFMQRDDPSKLPPALAALAEQSPVGRSTL  
PDGDPFWMVSGYDEARAVLSDPRFSSDRFRYHPRFKKLSGQLGERLRNDK  
ARAGSFINMDPPEHTRYRKLLTGQFTVRRMRQLTVRIEQIVTEQVDVMLA  
EGNSADLVSAFAVPVPSLMICELLGVRYEDRTEFORRAAGLLQTDLPKQ  
AVENLEAQRAFMRQLVTDKRRTPADDMISGLVHHAGAEPPLTDDELVGIA  
TLLLFAGLDTTASMLGLGMFMLLQRPQMAVLRDDPSRIGDAVEELLRYL  
TVVSTGLFRFAKEDVVLGDEHIPAGSTVVVSLMAANRDGRHWPEPETLDV  
TRVRSSHLAFGHGVHQCLGQQLARIELTVGITELLRRLPNVRLAVPPADV  
PLRNDMITYGVHRLPILWDTP

>CYP1051A1 (2571119624) *Salinispora arenicola* CNS342

MATDAAITRARTVPAWKALPAAVRDTHRAFDVGNWSDGDVVRVSLGVSR  
PYLVTNPAHVQEVLEHERAAIYPRGDDTALWRSVRKLVGDGILAEGDAAWAA  
SRRVLAPMFRPARINAMVDTMADAIAGAIDDLHGAATAGTPIDVGRELSR  
IVCSAIMRVFFADRITVRDALRIMKAQETIVTAMAPRILAPLVPWWIPMP  
GDRRFRAAVRSIDDILLPVLRQAQRQPDDGDDLLSRLVRARADDGRALSE  
KMRDLDLVSMVAVTTETSTVVLTWLWPLLANHPDVANRLYDEIDRVVGGG  
PVRGDHLAELTYTRMVLDLRLYPAGWILPRRAATTDVLGGVRINKGAT  
VILSPYVTQRMATAWWGPAAEAFDPERFAAGREAADGRHRYAYYPFGVGMH  
RCLGEHLFNLEAILIVATLLSRFRFALTDTSMPGVKVAASRTPARTVEMV

LKPIAPVPAR

>CYP105AB8 (2571120254) *Salinispora arenicola* CNS342

MTETASSRLTDTEFPVQRECPFAEPVEYEQIREQSSIAMVRLTGGGEAWW  
ISGHEQGRAVLADRRFSSDRRKANFPFVSTDPAIRKRLHAQPLSLISMDG  
AEHTQARRALIGEFTVRRLAALRPRIQQIVDQCIDEMLTDDQHRADLVKT  
LSLPVPSLVICELLGVFPYADHDFQEHATLVRRNTASEVRQHSIDELNA  
YLGALIDRKLASPDDDLGRQIARQHRDGTFRSSMVSLAFLLLVAGHET  
TANMISLGVVGLLQHPEQLAMIKDDDPDKTPLAIEELLRFFTIVDSVTSRV  
ATEDVRFGDTTINAGDGVVVSGLSADWDPTVFADPDRLDLERGARHHLAF  
GFGPHQCLGQNLARLELQIVFDTLFHRIPTLRLAAPLDKIPFKTDAAIYG  
ARELPVAW

>CYP105CH1 (2571120385) *Salinispora arenicola* CNS342

VSSLPLPTYPKLRDPADPLLPPAEYLAIQSEKPIAKVLLPSGRPTWLITG  
HALARQVLTEPCVSVDRRHFNFPYPVPNPDAVVAQVARWTYILLGDDPPL  
HTERRRLLISEFTVRQAQAMRPRIQQLVDFHLEQLIAAGPGADFSKHFAM  
QVPSAVICEMLGVPFADHDYFQERTALQLRRDVPVAAQKQAIDELLAYFE  
QLIQEKSSHPGDDVLSRLIVSNRETEAFDHEALVALGLLLLLVGGHETTAN  
TLTLATATMLERPEIAEQLRDPSLMPSAVEEFLRYFSVAVAVSRIATAD  
LQVGGQLVRAGESMLLVNLTARDGTVFPEPHRLDIRRNARNHLAFSHGI  
HQCIMGQNLARVEMQIALDTVLRRLPGLHLVTPFEELPFKYRHLVWGIEEL  
RVAW

>CYP1005A1 (2571120445) *Salinispora arenicola* CNS342

VSAVLFRSWTKTAGTRWPDVTRVADQNGTEHLVVTRHALVRQVLTQATY  
RPDNAMEAVTPIPVAAALRVLAGHRFRLPPTLANNGGVSHPAIRALVADAL  
HPTKVAAQRPWLTGLVADRVASIRTTLDSGGPVDLYADLTADLPLLVLAR  
LVELPDAPVNAVQKFARAALFWAPLDADRQLALADEVGRFHQVLREFA  
DTGGGLAAALRATGHSPDVLVGALFFLLVAGQETTSQFLTLLHRLSGEP  
TIRAALRAGSSSVADVVEEGLRLEPPIVWRRVAAVDSTLGGTTVAAGTS  
VLLWLARAGRDPVVAAPDEFRRPGQRGSRRLAFGAGAHRC LGDQLARME  
AAVVVEQATPLLDGVTVVRPPWYPDNLTFRMPDAFVVRR

>CYP105BL2 (2571120553) *Salinispora arenicola* CNS342

MSSHSAAPDPETATPLHTLAPELTFPQFERSTFPDPPQAYTELSGRCPV  
APVSMADGKPSWLITSFEGVRTTLDSPRFSDDMSHPGFPDRTGKPVDDL  
KDTLGAMDGERHRYRRLMTGELTVRRAKAMRPVITQITDEALDQLAAAG  
PGADLVKHVAFVVPSPRVACHLVGIPLSDYELFTGMAATLMDSTSSDDQFA  
ALQNMVSYFDTLVTDREHHRDDLLGHMVRRYLATGELTRDMLIRLAWTT  
MAAGQETTAHMI GLGVAALLRHPDQLELLRREPHLLPGAVDELMRYLPLI  
QFGIPRVAMDDVEVDGQTVTAGEGVVALPPLANRDPVFERPDELDVRRN  
ARQHLTFGYGPHQCPAHALARLELEVYGRLLERFPTLRLADSDADLVKQ  
DKDIMYRVSELAVTW

>CYP107EU1 (2571121147) *Salinispora arenicola* CNS342

VTIGQTLPLVYSPEFTRDPYAI FARLREQAPVCRVTTHRGMSAWMVTRH  
ADVRALLADNRLAKDGNRIGELMPRHSTLTGAATGFPPGLTTNMVNSDPP  
DHTRLRHLVGREFTGHRVEGLRPRIEEIVDDL LDGVAACGDEADLAETLA  
RRLPIAVIGELLGVPEADRAEFFRWADTLYGGTASPEALGQAYNAIVDYL

GRLCDAKRDPVADDLLTALVQVSADEDRLSREELVSMALLLLLVAGHETTS  
KQISNGVLALLLNPEQLKLLKAQPARTAGAVEELLRFEGPSLSASLRFTT  
EPVEVAGVVIPEGEFVLLSLASGNRDPEKFDPDPRLDITRSTQGNLAMGH  
GIHHCVGAALARLELEIVLSRLVARFPQMQLAVEADDLEWLVNSFFRAPL  
HLPVSLRR

>CYP105J3 (2571121188) *Salinispora arenicola* CNS342

MTDSVAFPPQGRVCPHQPAPGYRPLAVQRPLAQVTLYDGRRVWAVTTRDLA  
RRLLVDPRISSDRTNPAWPAIVPIVAAVNDAAQQKVLKIATALVGTGPE  
HKAQRKMLIPSTFRMRNALRPMIQEIVDQQLEMIKSGAPTDLIPAFAS  
AVPVTVLYRLMGIPDDDHGIFEKLSHQLLAGPNANEAYDQLMGYMSRLIA  
ERRRNPEGVLDLLAQHGANDDADHDELVSTLVVQVAGNHGTTGSMIAL  
GLFALLQHPEQLAELRADPSLMPTAVDELLRFLSVPDAVTRLAADDIEVE  
GTIIRKGDGVFFITSLINRDTDVHDAPNSLGWHHASAADHLTFGFGAHQC  
LGQSLARITMEIALGALIDRLPSLRLAVPAEEVPFLPAASLQVIAELPIT  
W

>CYP1198B1 (2571121390) *Salinispora arenicola* CNS342

MSGELTDQRTAPGAGGNPLRSLMDHGIRANPYPLFGELREAGPTAVEDGS  
VVLFGHEYEHCSQILRHRDMGSDTSEAPSIKGFVVDDAERAGSSIFFMDQP  
GHGRQRKLVSFSFTPRIVKSFGPQITHIVDGLFEDFRDKGELDVVTDLAY  
PVSIGIICDLFGIPDDERDMLKEWSDDLALSTELPTLGAAIGVLNVFTRD  
EINRFGSVMAAHAYFADLIHRRRNKPNPGDDLVSLLATESNGERLTRFEV  
TSVLATLFVAAHESTNLISSGILALLRNQDQMAVLRENPGELITNVVDES  
LRYDPPVHLAARMARARTTIGGYDLDPGTIVVVLMAGNRDPRAYENPDV  
FDVNRKIRNVSLAFGAGAHFCIGSGLAKLEAEIAISAFQAQLKHPEVDES  
SLEYRRHIVVRGLEHMKVSFQP

>CYP161N4 (2515981532) *Salinispora pacifica* CNT796

VNTVAQLPFTQTHVLDVAPALRLLQSRGKVHRVRTPEGVPAWLVTGHAEV  
QQLLDDDRLSRSDPGGRDGGTALLNKLLGPLADDHPRLRSLLEPQFTPER  
LKPLRAVVEKLTEQHLDELATRTPPVDLRPALAMSLPILVLCEWLGVPAE  
DKGRFSVWTQDAAGVQDPERSQRGLAELFGYCRQLVAAKRQDPGDDVISR  
LIATAGIGDTEAVALTALLLFGGYETTVARIGTGVLNLLTNPDQWAAVRA  
DPALVPATVDELLRRSMPNPNHNGMPRFVAVTGFEIDGAAIRAGDLVLLNI  
IAANHDETAFFDPDPRLDITRPTAGSLAFGHGRHSCVGAPLARMVLRVVLS  
RLITRLPDLRLAVGVDELKLRHETLVGGLVELPVWTWGPR

>CYP2054A3 (2515981538) *Salinispora pacifica* CNT796

MSISADSEVQGRFPDPYGAHRDDPYTFLAGLGVFYAPLLDAWCVTRRED  
MVAVLRDDRSFSARDHNPRPAVALPDDVNQMFRWTRGAGAVAVGSLDPPA  
HAKIRDVLNLGFTPARVRAFEPTMRAVATDLADRIGDAPEFDFIADFAPV  
FALEVIGRRLGVPDDYLDRCRTWSEQRIELMMAQGDADHDRLREFARGLM  
EFGEFARSLVRDRVADPRDDLISELLHDGKAGRTLTADEVAVQIPTLIFA  
GHMTCAEALGTIFYQQLRSPGGWARVVDRTIPVGDVVEEGLRFDSPLAGM  
YRTATRDVTVGGIRLTAGSRLLLLYGAAGRDSRAHACPAAFRPGDGSSGH  
LAFGHGHIHFCLGAGFARAELRVAVEVLAARMPDLGLAPGRPPRFRPVFPL  
RALTEL RVTRSGGSGP

>CYP107FH3 (2515981542) *Salinispora pacifica* CNT796

VPIELDEAFVQDPYAVYEKLRAEGPAHRVRMPPGVPLIGGLPVWLITGYD

AVRAALADSRLSTDLRRIDGLFAQKDPDRSHRGGFSSALASHMMHTDPPD  
HTRLRKLVSKAFTTRRAIEALRPRIQQTDELTAEMAGHDTVDLDDAFAP  
LPIRVICLLLGVPAEQENFRSWSRALVSGHSPEAAATAATEVAAYLGDL  
VERKRHATTDDVLTALVAAHDVDDRLTHTELVSTAYLLFIAGFETTLNAL  
GNGTLHMLHRDQWTALRADRALLDNAVEEFLRLESPLKHATFRCATESL  
RIGDAEIAAGDFVLLAIASANDPRRFPDPHTLDVRRPAAGHLAFGHGIH  
HCLGAPLARVEVRMAFDALLDAFPDMRLATDPAGLRWRNSTIIRGLDSL  
P  
VHLNN

>CYP107AW7 (2515982065) *Salinispora pacifica* CNT796

VETVTGTSTPPPVPYIADPYPTLARIRANGPVSIHLSDEGIPMWVIARYR  
DVRAALADPRFGQDARRAQALADNRVAGVALGGDIVHMLNSDPPDHTRLR  
RHVQRAFTARRVAAMRPLVERITTSLLDGLTGRTTVDLVQDFAFPLPLV  
ICELLGFPAEERNAYRSWSTAILTHDDDPAAFATALREMTDYIAVQLRIR  
QTRPGDDILTELLAARDAGQLTDEIIGMVFLLLIGGHETTVNLLGTATL  
ALMRNPDQHQWLLANQHALPEAIDEFLRYESPVAMATLRFTTTPVAVDDV  
VIPAGELVLVSLGGANRDPDRFPDADRLILDRRDTGHLAFGHGLHRCLGA  
FLGKLEGEVALGALLRRHPRLALAAEVRQLRWRDTIMLRGLESPLVSLHG

>CYP211B11 (2515982408) *Salinispora pacifica* CNT796

MDASEAVALLTSPPGRLDPYPTYERLRAHGPPVSTAPGFFVVTGYTEADT  
VLRNPRFEVMEDEERDGVFPHWQDSPAMISISRSMIRANPPDHSRMRLA  
AGVFTPRRVAALREVVAQAADGLVDEMIRAGRGAADVDFMGSFAYPLPVT  
VICALLGVPTADWFLRHWASDLTGVLPEEITPQELAIADAGASELRDYF  
TELIAQRRRAPADDLTALVQAHDADGDRLSGEELLANLVLLLVAGFETT  
TNLLGNGLVLLTHPDSATALRGQPELAPGYVEEFLRYDSPVQLTSRTVR  
ESVSLAGVELPAGSWLLVLLGAANRDPARFTDPARFDPRAQSPPLSFGA  
GAHYCLGAGLARLEAQVAFPLLLRRLPELALAGEPTRRHRLTLRGYETLP  
VTVGAVPADPGTPAGVALGTP

>CYP208A22 (2515984521) *Salinispora pacifica* CNT796

MTVIADRGGRIPPGPPVTAGLRLLLLALGRDRLGMMTSAAA EYGDVARLPV  
GPKKLYFFNHPDHAKHVLADNHANYQKGIGLVHARRALGDGLLTSEGELW  
RKQRRVIQPAFQNRRLAQYAGAVGQEATRLVARLATRVDPVPDVLDEMT  
RLTLGVLGRTLDDAELTGFGHVGESFAAVQDQAMFELETINTVPTWIPLR  
RQRRFRRARQHLQEVVDVLA AERGQAVEGRDDVLSRLILSTRAEADPQLG  
RERLRDELVTLLLAGHETTASTLGWSLHLLDQHPELRERVRHEARTVLGD  
RVPAYEDLHQLRYTAMVVEEAIRLYPPVWILTRKARAEDEIGGYRVPAGA  
DILICPYTLHRHPRFWAEPERFDPERFDPSTTDRPRYAYIPFGAGPRFC  
VGNNLGMLEATLVLA VLLRDLRLLEGLPGRAVVPEPMLSRLVRGGLPMTVR  
RVD

>CYP244A13 (2515985070) *Salinispora pacifica* CNT796

MQDTAQAKLAEAPEVTMPIELRPTDCLPELLAAARVAPVVRTPYLDQHAW  
VVCDELVKQALTHPKLGKDVALAPDWMRQPGQMVMTAMPPPEYARMMVMS  
DGEHHARIRRIHAPVLSRPNTERWSERVAALIDGFLDNLDSADGTEVNLI  
TDYTHKIPLAFTAEMGLPPGAERRLHDITEVTLYSADYALRQQAVGELF  
EAVQEWVRDPAGLRDGVVTGLLACTDGPDATVTESEAIWVTLSLIINGYE  
TTGSLISAALYEALRRPARERPHTDEAVAAWIEETLRVQPPVPNTTWRF  
LADLDLGGYLIPRGAPVQISLAAANLNPDDEADSFDAQRRGRGHL SFG  
LGH  
AHYCIGAPLARVQTKIALRGFLRRFPQARLSPDTPRWESEWMIRMSVL  
PVLLA

>CYP107AY9 (2515985091) *Salinispora pacifica* CNT796

MSQDQPTRAEIAPIPRSGARIGPEYDQLRKTDGVHQQVLLPDTSMWLVT  
PELVSRALADPRLALNRKHSRGGWSGFALPPALDANLLNLDAPDHTRLRR  
LVGPAFSPQORVAALRPRIQRTAEELAETVVATGSPVDLVTGYCTPLSVQV  
IADLLGVPEAGRTDLRAWTDMLTSYPPDRDAIRQAVVELHGYVNLIEA  
KQQRPGDDLSSALVATEQEGDRLTRDELTSALFLILFAGYENTANLIAST  
VLRLLDHGSLRGVRASEAIEETLRLEPPAPAAIRRFPTTEMTIGGATIPA  
GDTVLLSIAAATRGADGNPARLAFGNPHYCLGAALARAEEAIEITVLAR  
RLPGLALVVPVGPVVRWRPTFRTHGPAELLVAW

>CYP125A65 (2515985161) *Salinispora pacifica* CNT796

MTEPRIPVGFDFTDPAVLEHRVPREEFAELRRAPVWWNVQPRGSAGFDD  
DGYWVVTRYADVMASRDSETYSTRENTAIARFQPGTTQADREMQRVIMI  
NVDPPPEHTKLRAIVSRGFTPRAINALRGSLAERAERIVRDAAVRGTGDFV  
TDVACELPLQAIAGELIGVPQHRRKVFWDWSNQLIGYDDPAYGVDPMAAAA  
ELLYAMEMANERQRNPSDDLVTKLVAQIDGHELTDEFGFFVMLLAVA  
GNETTRNAITHGMLAFLEHPDQWELFKAERPRSAVEEIIIRWATPVNVFQR  
TALVDTTLGGQAITAGQRVALFYGSANFDESVEEPPERFDITRSPNPHLG  
FGSGVHFCLGANLARLEIELIFNSIADHMPDIRKVADPQRLRSGWINGI  
REMPVRYR

>CYP105AB28 (2515985353) *Salinispora pacifica* CNT796

MTETASTTTPGISSTTTSGPASGEVTDAEFPLERGCFFSTPTEYEQIREH  
SPLAKVRLTTGREAWWIAGHELGRAVLADRRFSSDRRRDNFPFVSTDPE  
RKQLQDQPTSMIGMDGAHAQARRALMGEFTVRRMAGLRPRIQQIVDQHI  
DEMLSSDQRTADLVEALSPLVPSLVICELLGVADHDFFQARSGPLIRH  
TTPTEVRLRIQKELNTYLGALIDRKVTDPTDDLRSRQIAKHHAAGTFDRT  
SLVSMAFLLLIAGHETTANMISLGVVGLLQHPDQLAMIKEDPEKTAPAVE  
ELLRYFTIADTVTARVATEDVQLGGTTINAGDGVVISGLAADHDPTVFTD  
PDRDLERGARHHVAFGFQPHQCIGQTLARMELQIVFDTLFRRIPTLRRLA  
APLDDIPFKSDAFVYGAERLPVAW

>CYP1005A6 (2515985400) *Salinispora pacifica* CNT796

VSVVLFERSWTKTAGTHWPAVTRVADQQGTEHLVVTEHALVRQVLTQV  
RPDNALDAVTPIPVAAALRVLAGHRFRLPPTLANNGGVSHPAIRALVADAL  
HPAKVAAQRPWLTELVAERVAAIRATLDSSGSADLHAELSADLPLLVLAR  
LVELPDAPVAAVKQFARAALFELFWAPLDADRQLALADEVGRFHQVLRFA  
DTGGGLAAALRATGHPPDVLVGFALFFLLVAGQETTSQFLTLHRLAGEP  
TVRAALRDGVSVDNVEEGLRLEPPIVTVRRVAAVDSTLGGTAVPAGTS  
VLLWALARAGRDPAIVSAPDEFPRPGQRGSRRHLAFGAGAHRCCLGDQLARME  
AAVVVERVSPLLDGVAVVRAPWYPDNLTFRMPDAFVIRRGPAAGSAER

>CYP107NG1 (2515985550) *Salinispora pacifica* CNT796

VTIPAGHSPAVCDFPVVQPDRLAVEPLFADLRSRTPIVRVRLPFGGTAWL  
LTRYRDIRAVLASAQCCRAATDPDTPRILPRAGGEGLLMSLDAPEHTRL  
RGLVTAWFTTRRVESLRPATEQAARQLIADMRGTGRADLVEQFSQKLSAT  
VIGDLLGVPRSDRETFQRWSEALLSSTSYTQTQVQQATAELNNYFGYLID  
QRDSHPSSDDLVTGLVRNMKAGKLSRREVLALVTDLLVAGFETTAGQLTNS  
VYTLSTTPGAWAWLAADRTRIPAAVEELLRALPLGAGGFRARVTTAPLTL  
GGDTRPTTIPAGHVIIAPTIAANTDPEAFDEPLTIRLDRPRNQHLAFGH  
GAHRCGLGAFLARMELTTALGELIEAFPSLTLVAPETDLQWKSGLQIRGPR  
ALPVTW



>CYP107E37 (2515985633) *Salinispora pacifica* CNT796

VTIDQEIREYPPRESSGIGIDPTYELLRRTEPLARVQLPYGEVSWLVTRY  
EDVKTVLTDPRFSRAAAQGKDQPRTRAEMTYEGIIIGLDPPDHTRLRLRLAG  
KALTARRVNAIRADAQRIAHEYVDEMIAKGSPGDLVELVALPYPTVICE  
LLGVPPFEDRAQFRIWTEGLTSTSEQLMAYAEQLFDYMGKLVQRRAEPTD  
DLLGALVKARDEGDRLTEQELLSIAGVGLLLTG VETVSTHIPNFVYALLT  
HPELMAQLRADRSLVPAAVEELLRMIPLNPAAMFPRYAVEDVTLSGFTVR  
AGQPVLVSLPGANRDPEVFENPETFDFTRDQNPVAFGHGPHHCLGAQLA  
RMELQVALHTVLD RFPDLRLADGDEGVSWKSGLLVRGPSRLLVGW

>CYP107AW7 (2515961521) *Salinispora pacifica* CNR114

VETVTGTSTPPFPYIADPYPTLARIRANGPVSILHSDEGIPMWVIARYR  
DVRAALADPRFGQDARRAQALADNRVAGVTLGGDIVHMLNSDPPDHTRLR  
RHLVQGAFTARRVAAMRPLVERITTSLLDGLTGRTTVDLVQDFAFPPLMLV  
ICELLGFPAEERNAYRSWSTAILTHDDDPAAFATALREMTDYIAVQLRIR  
QTRPGDDILTELLAARDAGQLTDDEIIGMVFLLLIGGHETTVNLLGTATL  
ALMRNPDQHRWLLANQHALPEAIDEFLRYESPVAMATLRFTTTPVAVDDV  
VIPAGELVLVSLGGANRDPDRFPDADRLILDRRDTGHLAFGHGLHRCLGA  
FLGKLEGEVALGALLRRHPRLALAAEVRQLRWRDTIMLRGLESPLVSLHG

>CYP107AX4 (2515961536) *Salinispora pacifica* CNR114

MTSQPAPVFDQLLLLRDPHRRYNALRDEAPVHHIRTPDGAPAWLVTRYDDV  
RAAFIDPRLSVDKRLSSTDGEHGSSLPPELDAHLLNRDPPDHTRLRLRLAA  
AAFTPRRVADLRPAVERIVSTLLDGLVGHDAQAELIGSLASPLPLQVMQEL  
LGLPTQTSVD FRRWTNTLLSADANQPAQSRSAMANMRRFLVEQLAHKRAR  
PGDDLLTGLLAAREDDRLTDDELVAMLFLLMFAGYDNTAALIGNVVHAL  
LTNTELPAAVRTGSLALDELVDGVLRWNPSFPLAVRRFAREPITIAGQTI  
PAGDRIWLCLASANRDPAQFTAPDTLGTTGMRRPHLSFGHGIHYCLGAPL  
ARLQTTVAVTILLDRFPGIRLAVPAHDIRWRESFRLRGLVALPVFL

>CYP125A65 (2515961832) *Salinispora pacifica* CNR114

MTEPRIPVGFDFTDPAVLERRVPREEFAELRRAPVWWNVQPRGSAGFDD  
DGYWVVTRYADVMAVS RDSETYSTRENTAIARFQPGTTQADREMQRVIMI  
NVDPP EHTKLRAIVSRGFTPRAINALRGSLAERAERIVRDAAVRGTGDFV  
TDVACELPLQAI AELIGVPQHHRKVFWDWSNQLIGYDDPAYGVDPMAAAA  
ELLAYAMEMANERQRNPSDDLVTKL VNAQIDGEHLTTDEF GFFVMLLAVA  
GNETTRNAITHGMLAFLEHPDQWELFKAERPRSAVEEIIRWATPVNVFQR  
TALVDTTLGGQAITAGQRVALFYGSANFDES VFEEPERFDITRSPNPHLG  
FGSGVHFCLGANLARLEIELIFNSIADHMPDIRKVADPQRLRSGWINGI  
REMPVRYR

>CYP208A22 (2515961928) *Salinispora pacifica* CNR114

MTVIADRGGRIPPGPPVTAGLRLLLLALGRDRLGMMTSAAA EYGDVARLPV  
GPKKLYFFNHPDHAKHVLADNHANYQKGIGLVHARRALGDGLLTSEGELW  
RKQRRVIQPAFQNRRLAQYAGAVGQEATRLVARLATRVDPGVLDVDEMT  
RLTLGVLGRTL LLD AELTGFGHVGESFAAVQDQAMFELETINTVPTWIPLR  
RQRRFRRARQHLQEVVDVLA AERGQAVEGRDDVLSRLILSTRAEADPQLG  
RERLRDELVTLLLAGHETTASTLGWSLHLLDQHPELRERVRHEARTVLGD  
RVPAYEDLHQLRYTAMVVEEAIRLYPPVWILTRKARAEDEIGGYRVPAGA  
DILICPYTLHRHPRFWAE PERFDPERFDPSRITDRPRYAYIPFGAGPRFC  
VGNNLGMLEATLVLA VLLRDLRLEGLPGRAVVPEPMLSRLVRGGLPMTVR

RVD

>CYP124M3 (2515961949) *Salinispora pacifica* CNR114

MTVPIELDAVDLSDNDFWTKPLEYRHAVFNALRAQPGLPHFASPEFGSAP  
RGRGYYALTRMDDVLAVSRNPSVFIISGKGNVAMEVPAEFLLDQSLITMDNP  
RHARLRIRIVSRGFSMKAVTALMDNASQMAKQIVDEVVERGECDVAVDISA  
KLPLGIIICNMMGIPDSQQQFVFEQTNVMLGVQDPEYVGEQNDAMLAMSVA  
SQELADLMHELATLRAKNPTDDLISKLLSAEVNGEALTPSELAHFFILLT  
GAGTETTRNAISWGIQLLTQSPEQREAWLSIDIDGVTPTAVEEIVRWSSPV  
ISQRRTVAEADAEPVKLAGQLLGPDKVLMFYGAANRDPNYFVHPEGFDVR  
RSPNPHVGYGGPGPHFCLGAHLARLEISVMFRELLTRIPDIHATGEPARL  
KSPLINGIKRLPVAFTPGAR

>CYP211B11 (2515962968) *Salinispora pacifica* CNR114

MDASEAVALLTSPPGRLDPYPTYERLRAHGPPVSTAAGFFVVTGYTEADT  
VLRNPRFEVMDDEERDGVFPHWQDSPAMISISRSMIRANPPDHSRMRRLA  
AGVFTPRRVAALREVVAQAADGLVDEMIRAGRGAADVDFMGSFAYPLPVT  
VICALLGVPAADWARFRHWASDLTGVLPEEITPQELAIADAGASELRDYF  
TELIAQRRRAPADDLTALVQAHDADGDRLSGEELLANLVLLLVAGFETT  
TNLLGNGLVLLTHPDSATALRGQPELAPGYVEEFLRYDSPVQLTSRTVR  
ESVSLAGVELPAGSWLLVLLGAANRDPARFTDPARFDPRAQSPPLSFGA  
GAHYCLGAGLARLEAQVAFPLLLRRLPELALAGEPTRRHRLTLRGYETLP  
VTVGAVPADPGTPAGVALGTP

>CYP1005A6 (2515964409) *Salinispora pacifica* CNR114

VSAVLFRSWTKTAGTHWPAVTRVADQQGTEHLVVTEHALVRQVLTQVQTY  
RPDNALDAVTPIPVAAALRVLAGHRFRLPPTLANNGGVSHPAIRALVADAL  
HPAKVAAQRPWLTELVAERVAAIRATLDSGGSADLHAELSADLPLLVLAR  
LVELPDAPVSAVKQFARAALFWAPLDADRQLALADEVGRFHQVLRFA  
DTGGGLAAALRATGHPPDVLVGALFFLLVAGQETTSQFLTLLHRLAGEP  
TVRAALRDGSVSVPNVVEEGLRLEPPIVTVRRVAAVDSTLGGTAVPAGTS  
VLLWLARAGRDPVVSAPDEFRRPGQQGSRRHLAFGAGAHRCIGDQLARME  
AAVVVEQVSPLLDGVTVVRAPWYPDNLTFRMPDAFVIRRGPAAGAAER

>CYP161N4 (2515964725) *Salinispora pacifica* CNR114

VNTVAQLPFTQTTHVLDVAPALRLLQSRGKVHRVRTPEGVPAWLVTGHAEV  
QQLLDDRLSRSDPGGRDGGTALLNKLLGPLADDHPRLRSLLPQFTPER  
LEPLRAVVEKLTEQHLDELATRTPPVDLRPALAMSLPIILVCEWLGVPAE  
DKGRFSVWTQDAAGVQDPERSQRGLAELFGYCRQLVAAKRQDPGDDVISR  
LIATAGIGDTEVVALTALLLFGGYETTVARIGTGVLTTNPDQWAAVRA  
DPALVPATVDELLRRSMPNPNHNGMPRFAVTGFEIDGAAIRAGDLVLLNI  
IAANHDETAFFDPDRDLITRPTAGSLAFGYGRHSCVGAPLARMVLRVALS  
RLITRFPDLRLAVGVDELKLRHETLVGGLVELPVTWGPR

>CYP2054A3 (2515964730) *Salinispora pacifica* CNR114

MSISADSEQVQGRPFDPYGAHRDDPYTFLAGLGVFYAPLLDAWCVTTRRED  
MVAVLRDDRSFSARDHNPRPAVALPDDVNQMFRTRWRGAGAVAVGSLDPPA  
HAKIRDVLNIGFTPARVRAFEPTMRAVAADLADRIGDAPEFDFIADFAPV  
FALEVIGRRLGVFPDDYLDRCRTWSEQRIELMMAQGDADHDRLREFARGLM  
EFGEFARSLSVRDRVADPRDDLISELLHDGKAGRTLTADEVAVQIPTLIFA

GHMTCAEALGTIFYQQLRSPGGWARVVDRTIPVGDLVEEGLRFDSPLAGM  
YRTATRDVTVGGIRLTAGSRLLLLYGAAGRDSRAHACPAAFRPGDGSSGH  
LAFGHGHIHFCLGAGFARAELRVAVEVLAARMPDLGLAPGRPPRFRPVFPL  
RALTEL RVTRSGGSGP

>CYP107FH3 (2515964735) *Salinispora pacifica* CNR114

VPIELDEAFVQDPYAVYEKLRAEGPAHRVRMPPGVPLIGGLPVWLITGYD  
AVRAALADSRLSTDLHRIDGLFAQKDPDRSHRGGFSSALASHMMHTDPPD  
HTRLRKLVSKAFTTRRAIEALRPRIQQTDELTAELAGHDTVDDLDAFAFP  
LPIRVICLLLGVPVAEQENFRSWSRALVSGHSPEAAATAATEVAAAYLGDL  
VERKRHATTDDVLTALVAAHDVDDRLTHTELVSTAYLLFIAGFETTLNAL  
GNGTLHMLHRDQWTALRADRALLDNAVEEFLRLESPLKHATFRCATESL  
RIGDAEIAAGDFVLLAIASANRDPRRFPDPHTLDVRRPAAGHLAFGHGHIH  
HCLGAPLARVEVRMAFDALLDAFPDMRLATDPAGLRWRNSTIIRGLDSL  
VHLNN

>CYP1437C1 (2515964971) *Salinispora pacifica* CNR114

VNAEPGPPTADDRRTPAVCPVAHPAPHYRISRERDVRAVLTDTTWPSRL  
GPGLVHAQPGGVLVASDPPLHTRQRAALLAPAFRPAAVAGLGGSVQELVDS  
LVDGLAPRGHADLMADLAVPLSMTVTCRMLGAEVEHAPRYWSWVLALAE  
LSRPRGSLDHRVAPAYRSFHLHFD AHLRRRRRAHL DAGGT PPPDLLTTLMT  
AEPDGRPLSHAELLGFCQFLLVAGSS TALLIGNVVHRLLTDPDQLDLVR  
RDPGLVAAAVEESLRVDAPLRGLFRTAGRATELAGVAIPERAKVLP LLAA  
ANRDPEHWPD PDRFDVTRPPAQLRRHLAFGHGVHYCLGASLARLEATTAV  
RAVLDRLPGLRPDGV PDRVRAELLNGFERLPVAWRV

>CYP163A10 (2515965383) *Salinispora pacifica* CNR114

MPSPTDALTRPAAEPYLPDPTVHAEQDL SGYFRQMRVHQPVAVRQSV DGP  
GFWLVSRHADVLTVCRESDSFVSTGGNVIDTLLNGGDTGAGRMLAVMDGP  
KHTSMRKLWRSFTPGALT TYAERIRAATRELLRTALLAGTCDFARDVAA  
HIPLAAICDLLGVPAADRQFILQRTSKALGSEGA AHAPGAARLAKGELL  
YFAKLARARRDEPADDLVTLSTGLVEGDRLTDDEVVLN CYSLILGGDET  
TRLALIGAVQALIQHPDQWKALKTGEVSTASATEEVLRWTS PALHVGRTA  
VRDVELGGHKIHSGDAVVAWTASANFDEAEFDEPERFDLARQPNRHLSFA  
HGPHYCLGVHLARIEIAALLDGLRET VNVLEPAGPTQRVHSNFLSGLSSL  
PLRLGA

>CYP162K1 (2515965391) *Salinispora pacifica* CNR114

MHLGGNRPGEGHFDLTDPTMFAGDRFIDALSYLREHEPVHFQTEENGPGF  
WIVTRHADVSHVYANADLFSSRLGMRLGANPD AVKAVADRMLIVTDNPEH  
TYVRRLVGS AFTPPVVRTLETHVKT VVRELMDRAIADAPREFVSSVARPL  
PTHII CSFMGLPRSDWERIGQLTTDGIDSDDDDVRLTANSEFLYFTEAI  
EERRQNPGQDLITILIRAAAEAEASGAPQLGDVDLVNLAGILIGANETT  
RYAVAGGLVALAKDRNQWMLRQQDQELVTPAVEEILRWTS PAVHAMRTVT  
QETRLGERTLAPGDRVTLWTYAANRDP SVFTEPDRFDITRHPNRHLSFGN  
GRHICVGARLARMEIAAFLEELRTRVQQIRLVEPVKWSPSNFTRGPLSVM  
AQLDPIGSPTAHQKGGNSNND CDARR

>CYP107AY9 (2515965478) *Salinispora pacifica* CNR114

MSQDQPTRAELAPIPRSGARIGPEYDQLRKTDGVHQVLLPDTSM AVLTS  
PDLVSRALADPRLALNRKHSRGGWSGFALPPALDANLLNLDAPDHTRLRR

LVGPAFSPQORVAALRPRIQRTAEELAETMVATGSPVDLVTGYCTPLSVQV  
IADLLGVDPDAGRDTLRAWTDMLTSYPPDRDAIRQAVVELHGYYVNLIEA  
KQQRPGDDLLSALVATEQEGDRLTRDELTSALFLILFAGYENTANLIAS  
VLRLLDHGSLRGVRVSEAIEETLRLEPPAPAAIRRFTEEMTIGGATIPA  
GDTVLLSIAAATRGADGNPARLAFNGPHYCLGAALARVEAEEAITVLAR  
RLPGLALAVPGAPVRWRPTFRTHGPAELLVAW

>CYP105AB28 (2515965967) *Salinispora pacifica* CNR114

MTETASTTTPGISSTTTSGPASGEVTDAEFPLERGCFFSTPTEYEQIREH  
SPLAKVRLTTGREAWWIAGHELGRAVLADRRFSSDRRRDNFFVSTDPE  
RKQLQDQPTSMIGMDGAHAQARRALMGEFTVRRMAGLRPRIQQIVDQHI  
DEMLSSDQRTADLVEALSPLVPVSLVICELLGVADHDFQARSGPLIRH  
TTPTEVRLRIQKELNTYLGALIDRKVTDPTDDLLSRQIAKHHAAGTFDRT  
SLVSMAFLLLIAGHETTANMISLGVVGLLQHPDQLAMIKEDPEKTPPAVE  
ELLRYFTIADTVTARVATEDVQLGDTTINAGDGVVISGLAADHDPTVFTD  
PDRDLERGARHHVAFGFGPHQCIGQTLARMELQIVFDTLFRRIPTLR  
LAAPLDDIPFKSDAFVYGAERLPVAV

>CYP294A4 (2515966081) *Salinispora pacifica* CNR114

MTLLDTAGLGPLPSFLQQQGAGAVLPVSPAGNTMWLVRDYLARKVLT  
PRFSRAAAVTPQAPKFNDQAADSMMSMDGAEHARLRRLVSGAFTTGRV  
AAIAPWVERWVDERLDRLERRGTGADLIGDLAAPLSVSVLCTLLGIPAA  
SERFRGWVEVLFDITASSPHEKGRRRLELLDYMGTIEQKRRQPDDALL  
VLIKAQERGEMSMALLTLGLTLLMAGYETTVGQIGLAALVILSDEVVYD  
ALKRQPERLPGTVEELLRLTPATPLSFSRVATRQVQLGEVTVRAGEGVV  
VLLHGNRDPATFPDPQRLLPQGRDAGHLTFGHGVHRCGLGAPLARLQIQ  
TVLNRLIGHFPRRLRLVDALEPVAVKHGLATRGLSRLSVEWR

>CYP107E37 (2515966157) *Salinispora pacifica* CNR114

VTIDQEIREYPPFRESRGIGIDPTYELLRRTEPLARVQLPYGEVSWLV  
TRYEDVKTVLTDPRFSRAAAQGKDQPRTRAEMTYEGIIIGLDPDHTLRRL  
LAGKALTARRVNARADAQRIANEYVDEMIAGSPGDLVELFALPYPVTVI  
CELLGVPFEDRAQFRIWTEGLTSTSEQLMVYAEQLFDYMGKLVAQRRAE  
PTDLLGALVKARDEGDRLTEQELLSIAGVGLLLTGVEVTVSTHINPFVY  
ALLTHPELMAQLRADRSVPAAVEELLRMIPLNPAAMFPRYAVEDVTLSGI  
TVRAGQPVVLVSLPGANRDPEVFENPETFDFTREQNPHVAFGHGPHHCL  
GAQLARMELOVALHTVLDRFPDLRLADGDEGVSWKSGLLVRGPSRLLV  
GW

>CYP105BL2 (2521820902) *Salinispora arenicola* CNY282

MSSHSAAPDPETATPLHTLAPELTFPQFERSTFPDPPQAYTELSGRCP  
VAPVSMADGKPSWLITSFEGVRTTLSDPRFSSDMSPGFPNRTGKPVDDL  
LKDTLGAMDGERHRYRRLMTGELTVRRAKAMRPVITQITDEALDQLAAAG  
PGADLVKHVAFVVPVSRVACHLVGIPLSYELFTGMAATLMDSTSSDDQFA  
ALQNMVSYFDTLVTDREHHDRDDLGHMVRRYLATGELTRDMLIRLAWTT  
MAAGQETTAHMIIGLVAALLRHPDQLELLRREPHLLPGAVDELMRYLPLI  
QFGIPRVAMDDVEVDGQTVTAGEGVVALPPLANRDPVFERPDELDVRRN  
ARQHLLTFGYGPHQCPAHALARLELEVYGRLLERFPTLRRLADSDADLKV  
QDKDIMYRVSELAVTW

>CYP211C1 (2521821747) *Salinispora arenicola* CNY282

VVDVEELLTRYLSAQGRQDPFPVYADLHAQGPIAALPPEPERRRVA  
AVAGYDLVGAVLRDPEWSKAPPPGWTEQEILRTLQTSMMFINPPDHGR  
MRHVAGTFTPRRLGALEPVVNRVADELLDRMADAGAGGLDFVAEFAYPL  
PARVM

AEFIGIPETELDWYRERVDVIDAFLDVAGKTPQRLAAANAAGAE LRAFYG  
ELLARRRRTPGEDLISGLVEAVDAGGVELTEDELVSNLIVLFNASFVTTV  
YMLSNGLPVLLAHPEVAAALATDPVLTAGAVDEILRLQAPVHLLARAAPR  
DTVLGGVPI PQGQNVLLLLIAAANRDP AHFPD PD RFD PWRSGPPSLAFGLG  
LHYCLGAAVSRLEGR LALPRLLSRFPR LRIMEQPVYSGSLFLRGIDKLSV  
SPGEGSTRE

>CYP125A41 (2521821896) *Salinispora arenicola* CNY282

MTEPRIPAGFDFTDPEVLAHRVPREEFAELRR TAPVWWNAQPRGSAGFDD  
DGYWVVTRYADVMTVSRDS DTYSTRENTAIARLRPD TTREDIEMQRVIML  
NVDPPEHTKLRAIVSRGFTPRAINALRGSLAERA EHIVRDAAVRGV GDFV  
SDVACELPLQAI AELIGVPQHRRKVF DWSNQLIGYDDPAYGTDPLTASA  
ELLAYAMEMAEERQRSPSDDLVT KL VNAQIDGEHLTTDEF GFFVMLLAVA  
GNETTRNAITHGMAAFLDNPEQWELFKAERP KSAVEE IIRWATPVNVFQR  
TALVDTVLGGQAI SAGQ RVALFYGSANFDEAVFEDPERFDITRSPNPHLG  
FGGSGAHFCLGANLARLEIELIFNSIADHLPDIRKVAAPQRLRSGWINGI  
RQMPVRYR

>CYP107AY2 (2521822122) *Salinispora arenicola* CNY282

MTAEPTPIPRSGARLGQEYDQLRK TGDVHQVLLPD TSLAWLVTNPEVAAR  
ALADPRLALNRRNSRGGS GFALPPALDANLLNLDAPDHTRLRRLVGP AF  
SPQRVAALRPGIRRAAEHLLDTLVATSGPTDLVTGYCNPLSVQVIADLMG  
VPEAGR TNLRATD TMLTSYPPDRDAIRQAVTELHG YVVDLIDIKQQQPG  
DDL LSALVTIEQDGDRLSRDELTS LAFLILFAGYENTANLIASAVLWLLD  
HGGLNVVPSS EAIEGTLRHEPPAPVAIRRFPTEDIIIGGV TIPAGDTVLL  
SIAAATRGADGNAARLAFGNGPHYCLGAALARVEAE EALT VLARRLPGLT  
LAVPPSQVRWRPTFRTHGPAELLVGW

>CYP105CT1 (2521822150) *Salinispora arenicola* CNY282

MNSPNHMPADRSLTAPTSGCPMALSRGRVGLDVADEISELRDGGRLGRIT  
TAFGQEAMLITRYDEVRAQMADSVVFN VAGVPSPPALVDGGFDTESVRRR  
RTVGNLIMLDPPEHTRLRRMVAAWFTTRRVERLRPRVVEIIDAALDEMER  
SGPPVDLVAMFAKTVPITVICELIGVPEELRERYRRRAERAVSASAVSTP  
LDELRLREAGWVSRELIEYHRENPSDDIIGMLLREHGTD SHDDGITDDE  
LVGLANALLIAGHETTTQMLSMGTLALLRHPDQLALLRDDPSIVAGAVEE  
LLRYVGV LHGGFVRVATRDTRLGGHRIHAGELVVPALTAANRDPRL LTDG  
DRLDITRPPTSHVAFGHGVHFCIGAPLARMELREAF PALLRFPGLRLAV  
PDSELEFTQGT TVYSLRGLPVTW

>CYP154M5 (2521822167) *Salinispora arenicola* CNY282

VEQSCP YKLDVTGRDVHAEGE AIRARGPVAQVELPGGVQGWSVTGYQAAR  
QVLADPRFAKDPKKWPAYTSGAIPP NWPLIGWLLMDNMTTNDGADHQRLR  
KLVS HGFTPRQVERTRPLIVKIVNDLLDGLSSAGPDEVVDLKGRFATPLP  
ARVICDMFGVPEALRASVLRGAQVNV TSSISGEEAEANVEQWHRELLELV  
EAKREKPD EDMA SL LIAAKEEDGSTLTQEEVVGT LHLMLGAGSETLMNAL  
SYAVLGMLS NPGQYEMVRNGTSSWDDVIEETLRAQAPVAQLPLRYATEDV  
AVGGAVIKAGDPVLMGFTAIGRDP AVHGETAGDYDITREDKTHLSFGHGV  
HFCLGAPLARLELKIALPALFERFPNMTLAVRPDQLEPQGT FIMNGHREL  
PVRLGQPATVLA

>CYP211B2 (2521822939) *Salinispora arenicola* CNY282

MDVSEAI AVLISPSGR LDPYPTYEQ LRAHG PVSRTTAGLFVVTGYAEADM

VLRDPRFVVLLDDDLRDDVFPWHQDSPAIKSIARSMRLRTNPPDHSRIRRLA  
AGAFTPRRVAAMREVVTAQADELVDEMIRAGRDGARVDFMDMFAYPLPVA  
VICALLGVPAADRSRFRRWAGDLTGILEPEITPEELAGADAGADELRDYF  
TGLIEQRRRAPADDLTALVQAHDADGDRLSGEELLANLVVLLVAGFETT  
TNLLGNGLVVLTRPEAAAAALRDEPD LAPGYVDELLRYDSPVQLTTRTVR  
ESVSFAGTELPTGSWLLVLLGAANRDPRRFPDPARFDPGRAQSQPLSFGA  
GPHYCLGAGLARLEAQVAFPLLLRRLPELALAGRPSRRRLTLRGYETLP  
ITVGAVTADRGTPAGVAPGTP

>CYP1005A1 (2521823030) *Salinispora arenicola* CNY282

VSAVLFRSWTKTAGTRWPDVTRVADQNGTEHLVVTRHALVRQVLTDQATY  
RPDNAMEAVTPIPVAAALRVLAGHRFRLPPTLANNGGVSHPAIRALVADAL  
HPTKVAAQRFPWLTGLVADRVASIRTTLDSSGGPVDLYADLTADLPLLVLAR  
LVELPDAPVNAVKKQFARAALFWAPLDADRQLALADEVGRFHQVLREFA  
DTGGGLAAALRATGHSPDVLVGALFFLLVAGQETTSQFLTLLHRLSGEP  
TIRAALRAGSSSVADVVEEGLRLEPPIVTVRRVAAVDSTLGGTTVAAGTS  
VLLWLLARAGRDPVVAAPDEFPRPGQGRSRRHLAFGAGAHRC LGDQLARME  
AAVVVEQATPLLDGVTVVRRPPWYPDNLTFRMPDAFVVRR

>CYP245A7 (2521823336) *Salinispora arenicola* CNY282

MPSATLPRFALTGWSRENIVNPYPVYQRYREVASVHRGEPGGDAPDTFYV  
FSYDEVVQVLSSNCFGRGRSLDAAKASVPVPAEQKALRAIVENWLVFMDP  
PRHTELRLSLNRSFSFPRIVTELPRPRIARIAQELL SRLGQQVDVDLVESFA  
APLPILVISELLGIPEERRAWLRANALALQEASSSRAGRVDVGYARA EVA  
AQEFTEYFREQVRLRRGRAGGDLITILANAQERGAPVSLDAIVGTCVHLL  
TAGHETTTNSLAKAVLALREHPAVLDEL RGAEGLTDDAVEEFLRYDPPVQ  
AVTRWAHQD TT LGGCDIPRGSRVVALLGSANRDPARFPSPDVL DVRRPAD  
RHLSFGLGIHYCLGATLARA ELEIGLQALLDGVP T LGYGTQHVDYADDLV  
FHGPSRLVLVNLGERCK

>CYP244A4 (2521823340) *Salinispora arenicola* CNY282

MSTTTNTELTEAPETNMPVD PGLFDCMPDLIAAARVAPVVRI PYLGRHAW  
VVC DREL VKQAL THPKMGKDIALVPEWMRQPGLMVTAQPDPEYARAMIMS  
DGENHARIRRIHAPVLSRPNTERWGERVADKVEGF LDEL SQAGSGGSTEV  
NVVTNYTHKIPLAFISEMLGLPPEAEHRLRGITDIMLYSSDYAARREAIG  
GLFGAVEDWVRNPADLRDGVITGLLAASDGPDAAVTEGEVIVWTLGMIIT  
GYETTGS LISTS LYEAIRPPHERPKTDEDITAWIEETLRVHPPFPHPPTW  
RFPLEDIELGGYLIPKGAPVQVSIAAANRKPGE GADSFDAERRGHGHL SF  
GLGMHYCIGAPLVRLEAQIAVRGFLRRFPQARLSAETAVQWESEWMIRRM  
SVLPAVLS

>CYP208A12 (2521823779) *Salinispora arenicola* CNY282

MTLDTITPRVPLGPPTAALRMLLV MKRDLGMLTSAAARYGDASRLPVG  
HKALWFFNHPRYAKHVLADNSANYHKGIGLVHARRALGDGLLTSEGLWR  
KQRKVIQPAFQSRRIAQQAGMIAEEAFALVERLRARAGAGPVELTAELTG  
LTLGVLGRSLLDADLAGFDSIGDSFATVQDQAMFELET LNAVPMWIPLPR  
QIRFRRARRKLQAVVDTLVDGRAGNLADRVDVLSRLILSARGEADPRVGR  
ERLRDELVTLLLAGHETTASTLGWTL SLIDRHPGVWERLHAEAVEVLGDR  
LPEYDDLRLRLRYTVMVVEEAMRLFPFVWLLPRRALAPDTIGEYRV PANAD  
VVISPYTLHRHPEFWPNPERFDPERFAPGQAADRPRYAYLPFGAGPRFCV  
GNNLGMMEAVFVIALLCRHLRLTGVPGYRLVPEPMLSLRIRGG LPLVVRP  
VS

>CYP105AB8 (2521823934) *Salinispora arenicola* CNY282

MTETASSRLTDTEFPVQRECPFAEPVEYEQIREQSSIAMVRLTGGGEAWW  
ISGHEQGRAVLADRRFSSDRKANFPFVSTDPAIRKRLHAQPLSLISMDG  
AEHTQARRALIGEFTVRRLAALRPRIQQIVDQCIDEMLTDDQHRADLVKA  
LSLPVPVSLVICELLGVFPYADHDFEQEHTATLVRRNTASEVRQHSIDELNA  
YLGALIDRKLASPDDDLGRQIARQHRDGTFRSSMVSLAFLLLVAGHET  
TANMISLGVVGLLQHPEQLAMIKDDPKTPLAIEELLRFFTIVDSVTSRV  
ATEDVRLGDTTINAGDGVVVSGLSADWDPTVFADPDRLDLERGARRHHLAF  
GFGPHQCLGQNLARLELQIVFDTLFHRIPTLRLAAPLKDIPFKTDAAIYG  
ARELPVAW

>CYP107FS2 (2521824232) *Salinispora arenicola* CNY282

MPVPQGEQNLTTTEVFADPKALFATLGSRQPLHRISLPDGMFAVLVTGNRE  
ARQALSDPRLVRSITAAAPELHKYHPLASDDYALSRHMLFADPPDHGRMR  
KLVSTAFTRRRVEQMRPRIQQITDDLIDVIAAKGEADLVETLALPLPIAV  
ISEMLGVFPFADRSEFERHAEVLTGINASSGFDAAIAAGRWFDEYLAELVQ  
QRRREPQDDLISGMLAAQDKGDRLTDVELRSNALLLLSAGFETTNNLVAN  
GLLALLRHPEAMAALRSEPNLMTTAVDELLRYDSPVSCVTYHFAQEPEI  
GGFEIRSGEHVVIAAAAANHDPTVFADPSRLDLRREGSGQILSFSGIHF  
CLGAPLARLEGEIAFGTVLRRLAGRLAVPTDSLWVKASFVLHRLERLPV  
TFTPDRAFPNIDSVHTV

>CYP105CN1 (2521824233) *Salinispora arenicola* CNY282

MAAPAPQATQSTTPHPPSYPLPRECPYRPSAGTARLRDAGPVSTVRLYDG  
RTAWLVGTAAEARALLADSRVSNRADFPNYPVMDERHLSMRATREMAREE  
EGGFAAALFGMDPPEHTRQORQLLLPRFTVRQVAARRPAIQRIVDEHLDAM  
EANGSPADLVSAFATPVPTMVVCTHLGVQYQDRTRFEPVAGLFEPDRAD  
AAMAELTAYLHQLIETKQSEPGDGVIDHLIANHLRPGAIDRAELVAIASA  
ILVAGTVTTSSAIALGTLALLTAPGQYAALVDNPDLPVAVNEILRYLSL  
VEQLARVATEDIEIGGKLIRAGDGIIVSFAAGNLDPNVTTHPDRLDVALP  
PTNHLAFSHGIIHCIGQNLALLELDIAFRALVSRFPTLRLAVPAEQLPY  
FAGDVPRCLACPVTW

>CYP105CP2 (2521824235) *Salinispora arenicola* CNY282

MTKSMPVQDLPAFFIPRECPYRPSAQHVSLRSGGPMKVRLYNGRTAWLV  
TDSAHAVALSDYRRVSIKPYHGNYPILLNEEFKVVDSGYADVLFGVDPP  
EHTRQORQMIMPSFTLRRTAVLRPDQIRIVDDKLDEMRRHGAPGDLVTEFA  
QPVPMSVMVSFLLGVFWEDHEEFETPAHKLFPVELAEEATTELGAYLERLI  
QKKEQPGGTPGGTGLLDDLIRDHLRAGALSDELVHIAMAMLVAGTDTT  
NVISLGTALLLDNPDQWAALRDNPDDELIPGAVEEILRYTSLIEAFARVAV  
SDIELNGAVIKEGEGILISSAGVNFDPALAPDPGRFDIRRPPRPSFSFSH  
GIHRCPGDNLARLELEIAFRSLVTRMPNLRRTAKPIDQIPSNNDGTLQRL  
YELPVVW

>CYP105J3 (2521824638) *Salinispora arenicola* CNY282

MTDSVAFPQGRVCPHQAPAGYRPLAVQRPLAQVTLYDGRRVWAVTTRDLA  
RRLLDVDPRISSDRNTNPAWPAIVPIVAAVNDAAQKVLKIATLVGTDGPE  
HKAQRKMLIPSFTRRMNALRPMIQEIVDQQLEMIKSGAPTDLIPAFAS  
AVPVTVLYRLMGIPDDDHGIFEKLSHQLLAGPNANEAYDQLMGYMSRLIA  
ERRRNPGEGLVDDLQAQHGANDDADHDELVSTLVVQVAGNHGTTGSMIAL  
GLFALLQHPEQLAELRADPSLMPTAVDELLRFLSVPDAVTRLAADDIEVE  
GTIIRKGDGVFFITSLINRDTDVHDAPNSLGWHHASADHLTFGFGAHQC  
LGQSLARITMEIALGALIDRLPSRLAVPAEEVPFLPAASLQVIAELPIT  
W

>CYP107Q4 (2521824883) *Salinispora arenicola* CNY282

MTTTAETS AETID LFSPEVVAD PFGWYARLREETGPTTGTLNIGTMMGGP  
EMWLVTTRYEDVRQVLTDP RFLTNPPADSPLEDIRAGVFKRLDFPPDLIPW  
MANLLNVSDGEDHTRLRKLVS YALTAHRIGKLRPRVEKITADLLDKLAED  
GKDGSPVDLVEEYCYPLPVTVICELVGIDEPDRPHWRAWGDSMATMNGER  
IPTTLVKCIELARELIAKRRAEPQDDLVTALVQAQAEQNRVSDDEIIGI  
LFSLVTAGHQTTTYLIGNSVILLLENPDQLARLKENPSMWPQAVRELQRL  
GPIQFAQPRFPSEDIELGGVTIPRGAPVAPLLLAANTDPRRFDPNKLII  
DRLAVGSEGHLGFGKGIHRCLGQHLAYQEA E VALQGLFTRFPDLSLAVPR  
EEIPWILRPGFTTRRTLPLKLV

>CYP105G5 (2521824884) *Salinispora arenicola* CNY282

LTIETTETTPPADDSLRAPLPRQFMQRDDPSKLPPALAALAEQSPVGRSTL  
PDGDPFWMVSGYDEARAVLSDPRFSSDRFRYHPRFKKLSGQLGERLRNDK  
ARAGSFINMDPPEHTRYRKLLTGQFTVRRMRQLTVRIEQIVTEQVDVMLA  
EGNSADLVSAFAVPVPSLMICELLGVRYEDRTEFQRRRAAGLLQTDLPKQ  
AVENLEAQRAFMQRLVTDKR RTPADDMISGLVHHAGAEPLTDDELVGIA  
TLLLFAGLDTTASMLGLGMFMLLQRPEQMAVLRDDPSRIGDAVEELLRYL  
TVVSTGLFRFAMEDVVLGDEHIPAGSTVVVSLMAANRDGRHWPEPETLDV  
TRVRSSHLAFGHGVHQCLGQQ LARIELTVGITELLRRLPNVRLAVPPADV  
PLRNDMITYGVHRLPILWDTF

>CYP1051A1 (2521824913) *Salinispora arenicola* CNY282

MATDAAITRARTVPAWKALPAAVRDTHR ALVDVGNWSDGDVVRVSLGVSR  
PYLVTNPAHVQEVLHERAAIYPRGDDTALWRSVRKLVGDGILAEGDAWAA  
SRRVLAPMFRPARINAMVDTMADAIAGAVDDLHGAATAGTPIDVGRELSR  
IVCSAIMRVFFADRITVRDALRIMKAQETIVTAMAPRILAPLPWWIPMP  
GDRRFRAAVRSID DILLPVLRQAQRQPDDGDDL SRLVRARADGRALSEK  
RMRDDLVSMAVTTETSTVVL TWLWPLL ANHPDVANRLYDEIDRVVGGGP  
VRGDHLAELTYTRMVLDELLRLYPAGWILPRRAATTDVLGGVRINKGATV  
ILSPYVTQRMTAWWGPTAEAFDPERFAAGREAADGRHRYAYYPFGVGMHR  
CLGEHLFNLEAILIVATLLSRFRFALTDTSMPGVKVAASTRPARTVEMIL  
KPVAPVPAR

>CYP166A4 (2521825104) *Salinispora arenicola* CNY282

MTDAISFELPWARTDKFDPPAVFDALREQRPLARMRYPDGHVGWIVSSYE  
LVREVLGDPRF SHSCAVGHFPVTHQGQVIP THPQIPGMFIHMDPPEHTRY  
RRLLTGEFTVRRTSRLTG HVEGVATEQIEVMRGGH GAPADLVATFARPLVL  
RVLSGLVGLPYGERDRYLH AVTLLHDAEADPAEAAAAAYEQAGAYFDEVIE  
RRRRQPEDDLISTLVGGGELTGEELRNIVTLLLFAGYETTESALAVGMFA  
LLHHEDQLARLRADPTKIDAAIEELLRYLTVNQYHTYRTASEDIELHGEV  
INKGDSVTVSLPAANRDPARFACPAELDIDRETSGHVAFGFGI HQCLGQN  
LARVELRAGLSALLRAFPNRLAVPADEVPLRLQGSVFAVKNLPVCW

>CYP105CH1 (2521825290) *Salinispora arenicola* CNY282

VSSLPLPTYPKLRDPADPLLPAPAEYLAIQSEKPIAKVLLPSGRPTWLITG  
HALARQVLTEPCVSVDRRHFNFPYPVPNPDAVVAQVARWTYILLGDDPPL  
HTERRLLI SEFTVRQAQAMRPRIQQLVDFHLEQLIAAGPGADFSKHFAM  
KVPSAVICEMLGVPFADHDYFQERTALQLRRDVPVAAQKQAIDELLAYFE



QLIQEKSSHPGDDVLSRLIVSNRETEAFDHEALVALGLLLLLVGGHETTAN  
TLTLATATMLERPEIAEQLRTPSLMPSAVEEFLRYFSVAVAVSRIATAD  
LQVGGQLVRAGESMLLVNLTARDGTVPFEPHRLDIRRNARNHLAFSHGI  
HQCMGQNLARVEMQIALDTVLRRLPGLHLVAPFEELPFKYRHLVWGIEEL  
RVAW

>CYP107EU1 (2521825429) *Salinispora arenicola* CNY282

VTIGQTLPLDVYSPEFTRDPYAI FARLREQAPVCRVTT HRGMSAWMVTRH  
ADVRALLADNRLAKDGNRI GELMPRHSTLTGAATGFP PGLTTNMVNSDPP  
DHTRLRHLVGREFTGHRVEGLRPRIEEIVDDLLDGVAAACGDEADLAETLA  
RRLPIAVIGELLGVPEADRAEFFRWADTLYGGTASPEALGQAYNAIVDYL  
GRLCDAKRDVPADDLLTALVQVSADEDRLSREELVSMALLLLLVAGHETTS  
KQISNGVLALLLNPEQLKLLKAQPARTAGAVEELLRFEGPSLSASLRFTT  
EPVEVAGVVIPEGEFVLLSLASGNRDPEKFPDPDRLDITRSTQGNLAMGH  
GIHHCVGAALARLELEIVLSRLVARFPQMLAVEADDLEWLVNSFFRAPL  
HLPVSLRR

>CYP248A2 (2521825513) *Salinispora arenicola* CNY282

VLADAVTAFDPTAVDVRRDPYPSYHWLLRHDPVHRGAHQVWYVSRFADVR  
AVLGDERFARTGIRRFWTDLVGPGLLSQIVGDIILFQDEPDHGRLRGVVG  
PAFSPSALRRLEPTIEATVNDLLRPARALGAMDVVADLAYPLALRAVLEL  
LGLPAGDANAVGRWSRAVGRTLDRGATAEDMRRGHAAIAEFADYVERALA  
ERREDGADLLALMLAAHGSQLMRNEIVSTVVTFFIFTGHETVASQLGNGL  
LSLLDHPEQLELMRRQPHLVPQAVEECLRFDPVQSNTROLAADVELHGR  
RLRRDDVVVVLAGAANRDPGRYDRPDELDIRRDPVPSMSFGAGMRYCLGS  
YLARLQLRTALGAMVALPDLRLACNPNELAYQPRTMFRGLTRLPVAFTPA  
G

>CYP105W2 (2521825521) *Salinispora arenicola* CNY282

MTGYQDRPTGDQPGAPVPSGSTDPGIGAFPLPRRCFPSPPAEYARLRAEH  
PVVRLPMLGGDTAWVVS RHADVRQVLS DPRMSADRRRP GF PKFAPTTEGQ  
RQASFANFRPPLNWLDPPEHAICRRQIVDEF SVRRVRQSRALVERVVDTH  
LDALTAAPGADLVSTFAYPVPSQV ICEVLGVVPYGEHEFFERRSTLMFRR  
STPADERARCAREIRDFLDMVVTDKEHRPGDDVLSRLLYRQRRAGGVDHE  
AVVSMAFVLLVAGHVTTSNMLALSVLALLTHPARLARLRAE PERFPAAVE  
ELLRYFTVVEAATARTATAEVTIGGV TIAAGEGVVALGQAANRDP RVFEH  
PDEFDPDRDARAHLAFGYGRHICPGQHLARLEMEVALSRLFRRLPGLRLT  
MEVSDLPLKEDSNIFGLYALPVAW

>CYP1198B1 (2521826052) *Salinispora arenicola* CNY282

MSGELTDQRTAPGAGGNPLRSLMDHGIRANPYPLFGELREAGPTAVEDGS  
VVLFGHEYEHCSQILRHRDMGSDTSEAPSIKGFVVDDAERAGSSI FFM DQP  
GHGRQRKLVS KSFTPRIVKS FGPQIAHIVDGLFEDFRDRGELDVVTDLAY  
PVSIGIICDLFGIPDDERDMLKEWSDDLALSTELPTLGAAIGVLNVFTRD  
EINRFGSVMAAHAYFADLIHRRRKNP GDDLVSLLATESNGERLTRFEV  
TSVLATLFVAAHESTTNLISGGILALLRNQDQMAVLRENPG LITNVVDES  
LRYDPPVHLAARMARATTIGGYDLDPGTIVVVLMAAGNRDP RAYESP DV  
FDVNRKIRNVSLAFGAGAHFCIGSGLAKLEAEIAISAF AQRLKHPEVDES  
SLEYRRHIVVRGLEHMKVSFQP

>CYP211B2 (2516002328) *Salinispora arenicola* CNT798

MDVSEAI AVLISPSGR LDPYPT YEQ LRAHG PVSQT TAGLFV VVTGYAEADM  
VLRDPR FVVLDDDLRDDVFPHWQDSPAIKSIARSM LRTNPPDHSRI RRLA  
AGAFTPRRVAAMREV VTAQADELVD EMIRAGRDGARVDFMDMFAYPLPVA  
VICALLGVPAADRSRFRRWAGDLTGILEPEITPEELAGADAGADELRDYF  
TGLIEQRRRAPADDLT TALVQAHDADGDRLSGEELLANLVVLLVAGFETT  
TNLLGNGLV VLLTRPEAAAAALRDEPD LAPGYVDELLRYDSPVQLTTRTVR  
ESVSFAGTELPA GSWLLVLLGAANRDPRRFPDPARFDPGRAQSQPLSFGA  
GPHYCLGAGLARLEAQVAFPLLLRRLPELALAGRPSRRTRLTLRGYETLP  
ITVGAVTADRGT PAGVAPGTP

>CYP125A41 (2516002751) *Salinispora arenicola* CNT798

MTEPRIPAGFDFTDPEVL AHRVPREEFAELRR TAPVWWNAQPRGSAGFDD  
DGYWVVTRYAD VMTVSRSDTYSTRENTAIARLRPDTTREDIEMQ RVIML  
NVDPP EHTKLRAIVSRGFTPRAINALRGSLAERA EHIVRDAAVRGV GDFV  
TDVACELPLQAI AELIGVPQHRRKVFDWSNQLIGYDDPAYGTDPLTASA  
ELLAYAMEMAEERQ RSPSDDLVT KLVNAQIDG EHLTTDEF GFFVMLLAVA  
GNETTRNAITHGMVAF L DNPEQWELFKAERP KSAVEEII RWATPVNVFQR  
TALVDTV LGGQAI SAGQRVALFYGSANFDEAVFEDPERFDITRSPNPHLG  
FGGSGAHFCLGANLARLEIE LIFNSIADHLPDIRKVAAPQRLRSGWINGI  
RQMPVRYR

>CYP244A4 (2516003264) *Salinispora arenicola* CNT798

MSTTTNTELTEAPETNMPVDPGLFDCMPDLIAAARVAPVVRIPYLGRHAW  
VVCDELVKQAL THPKMGKDIALVPEWMRQPGLMVTAQPDPEYARAMIMS  
DGENHARIRRIHAPVLS PRNTERWGERVADKVEGF LDELSQAGSGGSTEV  
NVVTNYTHKIPLAFI SEMGLPPEAEHRLRGITDIMLYSSDYAARREAI G  
GLFGAVEDWVRNPADLRDGVITGLLAASDGPDAAVTEGEVIVWTLGMIIT  
GYETTGS LISTS LYEAIRPPHERPKTDEDITAWIEETLRVHPPFPHTW  
RFPLEDIELGGYLIPKGAPVQVSIAAANRKPGE GADSFDAERRGHGHLSF  
GLGMHYCIGAPLVRLEAQI AVRGF LRRFPQARLSAETAVQWESEWMIRRM  
SVLPAVLS

>CYP245A7 (2516003268) *Salinispora arenicola* CNT798

MPSATLPRFALTGWSRENIVNPYPVYQRYREVASVHRGEPGGDAPDTFYV  
FSYDEVVQVLSSNCFGRGRSLDAAKASVPVPAEQKALRAIVENWL VFMDP  
PRHTELRSLLNRSFS PRIVTEL RPRIARIAQELL SRLGQQVDVDLVESFA  
APLPILVISELLGIPEERRAWLRANALALQEASSSRAGR DVDGYARAEVA  
AQEFTEYFREQVRLRRGRAGGDLITILANAQQRGAPVSLDAIVGTCVHLL  
TAGHETTNSLAKAVLALREHPTVLDELRGAEGLTTDAVEEFLRYDPPVQ  
AVTRWAHQD TTLGGCDIPRGSRVALLGSANRD PARFSPDVL DVRRPAD  
RHLSFGLGIHYCLGATLARA ELEIGLQALLDG VPTLGYGTQHVDYADDLV  
FHGPSRLVLVNLGERCK

>CYP105CP2 (2516003431) *Salinispora arenicola* CNT798

MTKSMPVQDLPAFFIPRECPYRPSAQHVSLRSGGPMKVRLYNGRTAWLV  
TDSA HARAVLS DYRRVSIKPYHGNYPLLNEEF EKVVDSGYADV LFGVDPP  
EHTRQRQMIMPSFTLRRTAVLRPDIQRIVDDKLDEM MRPGAPGDLVTEFA  
QPVP SMVISFLLGVPWEDHEEFETPA HKLFVPELAE EATTEL GAYLERLI  
QKKEQPGGTPGGTGLLDD LIRDHLRAGALS RDELVHIAMAMLVAGTDTT  
NVISLGT LALLDNPDQWAAALRDNPD ELIPGAVEEILRYTSLIEAFARVAV  
SDIELNGAVIKEGEGILISSAGVNFDPALAPDPGRFDIRPPRPSFSFSH  
GIHRCPGDNLARLELEIAFRSLVTRMPNLRTAKPIDQIPSNNDGTLQRL  
YELPVVW

>CYP105CN1 (2516003433) *Salinispora arenicola* CNT798

MAAPAPQATPSTTPHPPSYPLPRECPYRPSAGTAHLRDAGPVSTVRLYDG  
RTAWLVTGAAEARALLADSRVSNRADFPNYPVMDERHLSMRATREMAREE  
EGGFAAALFGMDPPEHTRQRQQLLPRFTVRQVAARRPAIQIRIVDEHLDAM  
EANGSPADLVSAFATPVPTMVVCTHLGVPYQDRTRFEPVAVAGLFEPDRAD  
AAMAELTAYLHQLIETKQSEPGDGVIDHLIANHLRPGAIDRAELVAIASA  
ILVAGTVTTSSAIALGTLALLTAPGQYTALVDNPDLPVPGAVNEILRYLSL  
VEQLARVATEDIEIGGKLIRAGDGIIVSFAAGNLDPNVTTHPDRLDVALP  
PTNHAFSHGIHHCIGQNLALLELDIAFRALVSRFPTLRLAVPAEQLPY  
FAGDVPRLACLPVTW

>CYP107FS2 (2516003434) *Salinispora arenicola* CNT798

MPVPQGEQNLTTTEVFADPKALFATLGSRQPLHRISLPDGMPAVLVTGNRE  
ARQALSDPRLVRSITAAAPELHKYHPLASDDYALSRHMLFADPPDHGRMR  
KLVSTAFTRRRVEQMRPRIQQITDDLIDVIAAKGEADLVETLALPLPIAV  
ISEMLGVPFADRSEFERHAEVLTGINASSGFDIAAAGRWFDEYLAGLVQ  
QRRREPQDDLISGMLAAQDKGDRLTDVELRSNALLLSAGFETTUNLIAN  
GLLALLRHPEAAMALRSEPNLMTTAVDELLRYDSPVSCVTYHFAQEPVEI  
GGFEIRSGEHVIVAAAAANHDPTVFAAPSRLDLRREGSGQILSFSGIHF  
CLGAPLARLEGEIAFGTVLRLLAGLRLAVPTDSLWKASFVLHRLERLPV  
TFTPDRDPNPIDSVHTV

>CYP125G6 (2516003473) *Salinispora arenicola* CNT798

VPTLLNEHVSYDGAIAIVDSGATSWIRLAERVNRWVHLLRAHGLDGTGD  
RLACVTGNRRTEFEVLLAALHTGVTVPVNWHLTVTEIGHILSDSGSRVV  
ITEELHVKAFAAAADGTAGPVAGLVLGDRVEGFAAVEPLLAASPAEPE  
GQVCGATMLYTSGTTGRPKGVVNNLFVTGAPYARVGRLCDYARSVLGVP  
RERMLLDGPWYHSSQLFFALLSLLQGSRLVIRPYFDPAATLKTIDDHRIT  
VTHLVPTQLVRLLRVDALTRQMFSGASLRRVWHGGGCPPEVKRSMIDWW  
GPVLVEYYGATEGGVVTLIDSAEWLARP GSVGRAVPPSEVVVVDDGGQSV  
AAGQTGQVFFRRRTGNRFHYHNAPEKTQAAYLAPDTFTTYGEVGHVDEG  
LFLTGRAQDMIVSGGVNVYPAEVEAALLRHPVVRDAAVIGVADDEFGERV  
VGIVVPETAVDPDDLATHLDAHCRVSLAGFKVPRTYRVVESLPRDETGL  
RKDALRSKFGWLSGAAMTVPRPATGQPTAHRPDIAHPTTYVSGVPHDEFA  
RRRRDEPVGWAEFVLTRHTAAGRTATRGSGFWAVTRYEDVVAASRRVTD  
FSSAAKGAFLLTDPRTPADLQQAQQLLVNMDDPHHARLRKLVTSTVFTPRV  
RGLLASIDAHAAALVAKVVAAGEFDVVTDLAAELPLLVLADLLGVPKQDR  
ALLYGWSNHLVGFDPDFGGGDIDAYRTAMAEAFQYALNLGVERRARPTD  
DLVSLLANAEVDGTRLTDREFCNFWLLL VVAGNETTRHLVAGTMQALTEH  
PGECARLVEGRVPMESAVEELLRWVTPIMQFRRTATRDTEIGGQAVTAGE  
KVVLYYTSANRDATVFAEPERLDLGRTPNRQLSFGIGPHYCLGAHLARAE  
LTALLRVMSPHLGSLLQLTGPVSRLASNFVNGVKAMPAVIGSR

>CYP154M15 (2516003498) *Salinispora arenicola* CNT798

MNDKCPFAALDVTGQDLHGAAARLREQGPAVLVELPGGVKAWSINRYEVI  
RELLMDRRVTKNARKHWPFAFIKGEIPPDWEMISWVAMDNMVTAYGKDHR  
LRKLVGRAFTQRRADALRPQVVALSTKLDDLGATPPGEVVDLRERFAYP  
LPAMLVASLIGMSEAALAACSKVIDMMVHTNVSPEEAQAVLRGWRAAMAD  
LIESKRRTPGEDITTDLIAAREEDGSRLSEAEADTIFAILGAGSETTIN  
FFDNAITALLSRPGQLQLLRTGAVTWDDVIDEVLRVESPLAHLPLRYAVE  
DIELDGVTIPQGDPILVNYAAAGRDPALHGGTADEFDLARGDKTHLSFGY  
GPHYCLGAGIARMVATIGLSMLFERFPDL SLAVPATELKRLP TFIMNGHQ  
TLPVRLTAHAR

>CYP107AY2 (2516003550) *Salinispora arenicola* CNT798

MTAEPTPIPRSGARLGQEYDQLRKTDGDVHQVLLPDASLAWLVNPEVAAR  
ALADPRLALNRRNSRGGWSGFALPPALDANLLNLDAPDHTRLRRLVGPAPF  
SPQRVAALRPGIRRAAEHLLDTLVATSGPTDLVTGYCNPLSVQVIADLMG  
VPEAGRTNLRATDTMLTSYPPDRDAIRRAVTELHGYYVDLIDIKQQQPG  
DDLLSALVTIEQDGDRLSRDELTSALFLILFAGYENTANLIASAVLWLLD  
HGGLNVVPSSEAEIEGTLRHEPPAPVAIRRFPTEDTIIGDVTIPAGDTVLL  
SVAAATRGAADGNAARLAFGNPHYCLGAALARVEAEAEALTVLARRLPGLT  
LAVPPSQVRWRPTFRTHGPAELLVGW

>CYP208A12 (2516003795) *Salinispora arenicola* CNT798

MTLDTITPRVPLGPPRTAALRMLLVMKRDLGMLTSAAARYGDASRLPVG  
HKALWFFNHPRYAKHVLADNSANYHKGIGLVHARRALGDGLLTSEGDLWR  
KQRKVIQPAFQSRRIAQQAGMIAEEAFALVERLRARAGAGPVELTAEITG  
LTLGVLGRSLLDADLAGFDSIGDSFATVQDQAMFELETINAVPMWIPLPR  
QIRFRARRRKLQAVVDTLVDGRAGNLADRVDVLSRLILSARGEADPRVGR  
ERLRDELVTLLLAGHETTASTLGWTLSLIDRHGPGVWERLHAEAVEVLGDR  
LPEYDDLRLRLRYTVMVVEEAMRLFPFVWLLPRRALAPDTIGEYRVPANAD  
VVISPYTLHRHPEFWPNERFDPERFAPGQAADRPYAYLPFGAGPRFCV  
GNNLGMMEAVFVIALLCRHLRLTGVPGHRLVPEPMLSLRIRGGGLPLVVRP  
VS

>CYP105BL2 (2516004105) *Salinispora arenicola* CNT798

MSSHSAAPDPETATPLHTLAPELAFFPQFERSAPFDPPQAYTELSGRCPV  
APVSMADGKPSWLITSFEGVRTTLSDPRFSSDMSHPGFPNRTGKPVDDL  
KDTLGAMDGERHRYRRLMTGELTVRRAKAMRPVITQITDEALDQLAAAG  
PGADLVKHVAFVVPSPRVACHLVGIPLSDYELFTGMAATLMDSTSSDDQFA  
ALQNMVSYFDTLVTDREHHDRDDLLGHMVRRYLATGELTRDMLIRLAWTT  
MAAGQETTAHMIIGLGAALLRHPDQLELLRREPHLLPGAVDELMRYLPLI  
QFGIPRVAMDDVEVDGQTVTAGEGVVALPPLANRDPVFERPDELDVRRN  
ARQHLTFGYGPHQCPAHALARLELEVYGRLLERFPTLRLADSDADLKVQ  
DKDIMYRVSELAVTW

>CYP105CH1 (2516004180) *Salinispora arenicola* CNT798

VSSLPLPTYPKLRDPADPLLPAPAEYLAIQSEKPIAKVLLPSGRPTWLITG  
HALARQVLTEPCVSDRRHPNFPYPVPNPDAVVAQVARWTYILLGDDPPL  
HTERRRLLISEFTVRQAQAMRPRIQQLVDFHLEQLIAAGPGADFSKHFAM  
KVPSAVICEMLGVPFADHDYFQERTALQLRRDVPVAAQKQAIDELLAYFE  
QLIQEKSSHPGDDVLSRLIVSNRETEAFDHEALVALGLLLLVGGHETTAN  
TLTLATATMLERPEIAEQLRDPSLMPSAVEEFLRYFSVAVAVSRIATAD  
LQVGGQLVRAGESMLLVNLTARDGTVFPEPHRLDIRRNARNHLAFSHGI  
HQCMGQNLARVEMQIALDTVLRLPLGLHLVAPFEELPFKYRHLVWGIEEL  
RVAW

>CYP107Q4 (2516004337) *Salinispora arenicola* CNT798

MTTTAETSATIDLFSPEVVADPFGWYARLREETGPTTGTLNIGTMMGGP  
EMWLVTREYEDVRQVLTDPRFLTNPADSPLEDIRAGVFKRLDFPPDLIPW  
MANLLNVSDGEDHTRLRKLVSYALTAHRIGKLRPRVEKITADLLDKLAED

GKDGSPVDLVEEYCYPLPVTVICELVGIDEPDRPHWRAWGDSMATMNGER  
IPTTLVKCIELARELIANRRAEPQDDLVLTALVQAQAEQNRVSDDEIIGI  
LFSLVTAGHQTTTYLIGNSVILLLENPDQLARLKDNPSPMWPQAVRELQRL  
GPIQFAQPRFPSEDIELGGVTIPRGAPVAPLLLAANTDPRRFPDPNKLI  
DRLAVGSEHGLGFGKGIHRCLGQHLAYQEAEEVALQGLFTRFPDLSLAVPR  
EEIPWILRPGFTRTRTLPLKLV

>CYP105G5 (2516004338) *Salinispora arenicola* CNT798

LTIETTETPPADDSLRAPLPRQFMQRDDPSKLPALAAAEQSPVGRSTL  
PDGDPFWMVSGYDEARAVLSDPRFSSDRFRYHPRFKKLSGQLGERLRNDK  
ARAGSFINMDPPEHTRYRKLLTGQFTVRRMRQLTVRIEQIVTEQVDVMLA  
EGNSADLVSAFAVPVPSLMICELLGVRYEDRTEFQRRRAAGLLQTDLPKQ  
AVENLEAQRAFMQRLVTDKRRTPADDMISGLVHHAGAEPPLTDDELVGIA  
TLLLFLAGLDTTASMLGLGMFMLLQRPEQMAVLRDDPSRIGAAVEELLRYL  
TVVSTGLFRFAKEDVVLGDEHIPAGSTVVVSLMAANRDGRHWPDPETLDV  
TRVRSSHLAFGHGVHQCLGQQLARIELTVGITELLRRLPNVRLAVPPADV  
PLRNDMITYGVHRLPILWDTP

>CYP1051A1 (2516004358) *Salinispora arenicola* CNT798

MATDAAITRARTVPAWKALPAAVRDTHRAFVDVGNWSDGDVVRVSLGVSR  
PYLVTNPAHVQEVHERAAIYPRGDDTALWRSVRKLVGDGILAEGDAWAA  
SRRVLAPMFRPARINAMVDTMADAIAGAVDDLHGAATAGTPIDVGRELSR  
IVCSAIMRVFFADRITVRDALRIMKAQETIVTAMAPRILAPLVPWWIPMP  
GDRRFRAAVRSIDILLPVLQRQAQRQPDGDDLRLSRVLRARADDGQALSE  
KMRDDLVSMVAVTETSTVVLTLWLWPLLANHPDVANRLYDEIDRVVGGG  
PVRGGHLAELTYTRMVLDELLRLYPAGWILPRRAATTDVLGGVRINKGAT  
VILSPYVTQRMATAWWGPTAEAFDPERFAAGREAADGRHRYAYYPFGVGMH  
RCLGEHLFNLEAILIVATLLSRFRFALTDTSMPGVKVAASRPARTVEMI  
LKPVPAPVPAR

>CYP211C1 (2516004510) *Salinispora arenicola* CNT798

VVDVEELLTRLYSAQGRQDPFPVYADLHARGPIAALPPEPERRRVAAVAV  
GYDLVGAVLRDPEWSKAPPPGWTEQEILRTLQTSMMFINPPDHGRMRHVF  
AGTFTPRRLGALEPVVNRVADELDRMADAGAGGLDFVAEFAYPLPARVM  
AEFIGIPETELDWYRERVDVIDAFLDVAGKTPQRLAAANAAGAELEAFYF  
ELLARRRRTPEGDLISGLVEAVDAGGVELTEDELVSNLIVLFNASFVTTV  
YMLSNGLPVLLAHPEVAAALATDPVLTAGAVDEILRLQAPVHLLARAAPR  
DTVLLGGVPPIQGNVLLLIIAANRDPAHFPDPDRFDPWRSGPPSLAFGLG  
LHYCLGAAVSRLEGRALPRLLSRFPRLRIMEQPVYSGSLFLRGIDKLSV  
SPGEGSTRE

>CYP166A4 (2516004671) *Salinispora arenicola* CNT798

MTDAISFELPWARTDKFDPPAVFDALREQRPLARMRYPDGHVGVIVSSYE  
LVREVLGDPRFSHSCAVGHFPVTHQGQVIPTHPQIPGMFIHMDPPEHTRY  
RRLLTGEFTVRRTSRLTGHEVERVATEQIEVMREHGAPADLVATFARPLVL  
RVLSGLVGLPYGERDRYLHAVTLLHDAEADPAEAAAAYEQAGAYFDEVIE  
RRRRQPEDDLISTLVGDGELTGEELRNIVTLLLFAGYETTESALAVGMFA  
LLYHEDQLARLRADPTKIDAAIEELLRYLTVNQYHTYRTASEHIELHGEV  
INKGDSVTVSLPAANRDPARFACPAELDIDRETSGHVAFGFGIHCCLGQN  
LARVELRAGLSALLRAFPNRLRLAVPADEVPLRLQGSVFAVKNLPVCW

>CYP107AX13 (2516004707) *Salinispora arenicola* CNT798

VTSPPHVAFGHLLLRDPHGQYNALRGQAPVHHIRTPDEAPAWLVMRYDDV  
RAALTDPRLSVDKRFSDTDGEHGSSLPPELDAHLLNRDPPDHTRLRRLAA  
AAFTPRRVADQAPAVATIVDALLDGIAGQDQAEIIGGLASPLPLQVMHEL  
LGLPTQTSVDFRNWTNTLLSADANQPAQSRSAMATMRQFLMGQLARKRAQ  
PGDDLLTGLLAARDDDDRFTDDELLAMVFLLMFAGYDNTAALIGNVTHAL  
LTDAGLHDAVRAGSVDLDSVVDEVLRWNPSFPLAVRRFAREPVAIAGHTI  
PAGDRVWLCLASANRDPAQFTEPDELGITPARRPHLAFGHGIHYCLGAPL  
ARLQTTVAVASLLDRCPGIRLAVPAHELRLWRESFRVRGLAALPVRL

>CYP1005A1 (2516004744) *Salinispora arenicola* CNT798

VSAVLFRSWTKTAGTRWPDVTRVADQSGTEHLVVTRHALVRQVLTQATY  
RPDNAMEAVTPIPVAAALRVLAGHRFRLPPTLANNGGVSHPAIRALVADAL  
HPTKVAAQRPWLTGLVADRVASIRTTLDSSGGPVDLYADLTADLPLLVLAR  
LVELPDAPVNAVKKQFARAALFWAPLDADRQLALADEVGRFHQVLRIFA  
DTGGGLAAALRATGHSPDVLVGALFFLLVAGQETTSQFTLLHRLSGEP  
TIRAALRAGSISVADVVEEGLRLEPPIVWRRVAAVDSTLGGTTVAAGTS  
VLLWLARAGRDPVAVAAPDEFPRPGQRGSRRLAFGAGAHRLGDLARME  
AAVVVEQATPLLDGVTIVRPPWYPDNLTFRMPDAFVVR

>CYP107FJ2 (2516005090) *Salinispora arenicola* CNT798

MSETLSTSVLLADAAEQRAWRAKLRGAGPVHRITTSGETGWLIVGHEEA  
RNALVDLRLQGRATATVGHGRRMPEDLERALNSHMLNVGPPDHTRLRLRLVS  
AAFTRRRIEQMRPRIQELTDELLDGLAGADEADLVAGLALPLPMRVLVDL  
FGIPAEDCADFNWTKVLTSAGAVDLDRLTAAAGEMVAYLRGLLDRKRQV  
PESDLLSALVAVRDGADRLSDDELTSMVYLLLTAGYETTVNLIGNGLNL  
LANPEQLVAFKADPDLQVVEEAMRFDSPVQIAVRHSTEPVEIAGQAIP  
SGALILVSLWANRDPDRFTEPEAFRVDRQDNPLGFGYGFHHCIGAPLA  
RMEGTIAIGTVIRRFAPALRLAHPAGSLTWRASMVMHGLTALPVHLR

>CYP154M20 (2516005097) *Salinispora arenicola* CNT798

MERCPYVLDRAGRDLHGAEAKALRARGPVTLEVELHGGYTAVSVTSYEIAKQ  
LLVDPRISKNTKETWPEFREGKVPQDWELYTWVAMDNMQTRDGEHDLRL  
KLVAQAFTTRQVAKVRPMIEDIVDRLDDLEKVPAGEVVDIKGRYFYPLS  
TILVCDLLGIPEADRAEALHGTVVNARTTNSAESEANLHQWQSALSKLV  
ETKRREPGNDITTLIIKAREDEQAPLTDDEVIGSLHLLIGGGTETTSNVL  
CNTLIDLTHPDQMAMIRSGAVGWEEAWEVEVRKDGAVGSMPPFRCANADI  
EIGGVTIAGKDLVLINAAAGRDPERYGDTTAEFDITRADKTNLSFGYGR  
HRCGLPALATMEAMISLPALFERFPDLVLAVPRDELKPKQGTFFVNGYAEV  
PMLLRS

>CYP248A2 (2516005121) *Salinispora arenicola* CNT798

VLADAVTAFDPTAVDVRRDPYPSYHWLLRHDPVHRGAHQVWYVSRAFADVR  
AVLGDERFARTGIRRFWTDLVGPGLLSQIVGDIILFQDEPDHGRLRGVVG  
PAFSPSALRRLEPTIEATVNDLLRPARALGAMDVVADLAYPLALRAVLEL  
LGLPAGDANAVGRWSRAVGRTLDRGATAEDMRGHAAIAEFADYVERALA  
ERREDGADLLALMLAAHRSQLMRNEIVSTVVTFTFTGHETVASQLGNGL  
LSLLDHPEQLELMRRQPHLVPQAVEECLRFDPVQSNTRQLAADVELHGR  
RLRRDDVVVVLAGAANRDPGRYDRPDELDIRRDVPVSMFSGAGMRYCLGS  
YLARLQLRTALGAMVALPDLRLVCNPNELAYQPRTMFRGLTRLPVAFTPA  
G

>CYP105W2 (2516005129) *Salinispora arenicola* CNT798

MTGYQDRPTGDQPGAPVPSGSTDPGIGAFPLPRRCFFSPPAEYARLRAEH  
SVVRLPMLGGDTAWVVSRRHADVRQVLS DPRMSADRRRP GPFKFAPTTEGQ  
RQASFANFRPPLNWLDPPEHAICRRQIVDEF SVRRVRQSRALVERVVDTH  
LDALTAAPGADLVSTFAYPVSSQVICEVLGVPYGEHEFFERRSTLMFRR  
STPADERARCAREIRDFLDVVVTDKEHRPGDDLLSRLLYRQRRAGGVDHE  
AVVSMAFVLLVAGHVTTSNMLALSVLALLTHPARLARLRAEPPERFPAAVE  
ELLRYFTVVEAATARTATAEVTIGGVTIAAGEGVVALGQAANRDPRVFEH  
PDEFDPDRDARAHLAFGHGRHICPGQHLARLEMEVALSRLFRRLPGLRLT  
MEVSDLPLKEDSNIFGLYALPVAW

>CYP154M13 (2516005142) *Salinispora arenicola* CNT798

MSTGRPVVLDPTGRDIHGEADHLRALGPATLVELPGGVLAWSINSYEVGK  
ALLSAPNVSKSARRHWPAFYNGEIPPDWEMISWVAMDNISTTFGGDHRRL  
RRLTAKAFGSRRAEQVRPMATHMVNTLLDRMADAADAGEVVDLKAAFAYP  
LPGMLVAELIGMSEEARVAAAKVIDMMTATNITPEQAQGVLLGWRDAITD  
LIALKRAQPGDDITSDLIAARDEDGSLLTEQELVDITIFAILGAGSETTIN  
FFDNAITQLLTHPEQLELVKSGQVSWDDVIEEVLRLSPLASLPMRFAVE  
DIQLDGVTIHRGDPIILINYAALGRDPELHGESAGVFDVTRQHKEHLSFGH  
GAHYCLGAGIARMVAKTGLSALFERFPRMTLAVSAKDLVPYPTFIMNGNR  
QLPVHLSGALKWREGEQSALGRA

>CYP154M21 (2516005143) *Salinispora arenicola* CNT798

MEKCPYVLDRAGSDIHKEASNLRRARGPVTLEVELHGGYTAWSVTSYEVAKQ  
LLMDPRISKNTKAHWPEFRDGNVPQDWELYTWVAMDNMQTRDGKEHDLRL  
KLVAFAFTGRQAVKSRPIIEEIVNRLDDLETA PRGQAVDIKARYFYPLS  
TILVCDLLGIAEEDRDVILHGNVNSKTTNTAESEANLHQWQTALGRLV  
ETKRRDPGDDLTTVIIKAGEDEQTPLTDDEVIGSLHLLIGGGTETTANVL  
CHTVVDMLTHPDQLAMVRSGAVSWESAWEEVVRKDGAVGSMPFRCATDDV  
EIGGVTTIAKGDVLVLINYAAAGRDPERYGDAAAEFDITRADKANLSFGYGR  
HRCLGPALATMEAMVALPALFDRFPNLALAVPPNELKPGQGTFFNGYAEV  
PLLLRS

>CYP105AB8 (2516005308) *Salinispora arenicola* CNT798

MTETASSRHTDTEFPVQRECPFAEPVEYEQIREQSSIAMVRLTGGGEAWW  
ISGHEQGRAVLADRRFSSDRKANFPFVSTDPAIRKRLHAQPLSLISMDG  
AEHTQARRALIGEFTVRRLAALRPRIQQIVDQCIDEMLTDDQHRADLVKT  
LSLPVPSLVICELLGVPPYADHDFEQEHTATLVRRNTASEVRQHSIDELNA  
YLGALIDRKLASPDDDLGRQIARQHRDGTFRSSMVSLAFLLLVAGHET  
TANMISLGVVGLLQHPEQLTMIKDDPKTPLAIEELLRFFTTIVDSVTSRV  
ATEDVRFGDTTINAGDGVVVSGLSADWDPTVFADPDRDLERGARHHLAF  
GFGPHQCLGQNLARLELQIVFDTLFHRIPTLRLAAPLKDIPFKTDAAIYG  
ARELPVAW

>CYP105J3 (2516005486) *Salinispora arenicola* CNT798

MTDSVAFPQGRVCPHQAPGYRPLAVQRPLAQVTLYDGRRVWAVTTRDLA  
RRLLVDPRISSDRTNPAWPAIVPIVAAA VND AQQKVLKIATALVGTDGPE  
HKAQRKMLIPSFTFRMNALRPMIQEIVDQQLD EMIKSGAPTDLIPAFAS  
AVPVTVLYRLMGIPDDDHGIFEKLSHQLLAGPNANEAYDQLMGYMSRLIA  
ERRRNPGEGLVDDLQAQHGANDDADHDELVSTLVVQVAGNHGTTGSMIAL  
GLFALLQHPEQLAELRADPSLMPTAVDELLRFLSVPDVAVTRLAADDIEVE  
GTIIRKGDGVFFITSLINRDTDVHDAPNSL GWHHASAADHLTFGFGAHQC

LGQSLARITMEIALGALIDRLPSRLAVPAEEVPFLPAASLQVIAELPIT  
W

>CYP107EU1 (2516005963) *Salinispora arenicola* CNT798

VTIGQTLPLDVYSPEFTRDPYAIFARLREQAPVCRVTTHRGMSAWMVTRH  
ADVRALLADNRLAKDGNRIGELMPRHSTLTGAATGFPPGLTNNMVNSDPP  
DHTRLRHVLVGREFTGHRVEGLRPRIEEIVDDLLDGVAACGDEADLAETLA  
RRLPIAVIGELLGVPEADRAEFFRWADTLYGGTASPEALGQAYNAIVDYL  
GRLCDAKRDVPADDLLTALVQVSADEDRLSREELVSMALLLVAGHETTS  
KQISNGVLALLLNPEQLKLLKAQPARTAGAVEELLRFEGPSLSASLRFTT  
EPVEVAGVVIPEGEFVLLSLASGNRDPEKFDPDPRLDITRSTQGNLAMGH  
GIHHCVGAALARLELEIVLSRLVARFPQMQLAVEADDLEWLNVNSFFRAPL  
HLPVSLRR

>CYP162P1 (2516006053) *Salinispora arenicola* CNT798

MGLPSEVDLAEPDLADPDLYAEGDPDAEWAWLRAHRPVYRNPAGATAEFW  
ALTRYRDALQVYRDPSTFSSERGMVLGVDPVAGDPAAGRMLVVTDPPRHP  
KLRRIVSGIFVPRTMHRLEGRVRSIVDQLLHRVVDGAGRCDVFNDVAARL  
PVAIIICELLGVPADEQDWMYHLTSTAFGGGDPAGSAEVS AVERAEAYGDI  
LLYYGELAAERRRRPGDDLVTLLVHADLDGEPLDVEDVLVNCTNLIIGGN  
ETTRHAASGGLLALAQRPELWRRLRETPTAVPTAVEEVLRWTTPGMHVLR  
TATRDTEIGGVPIRAGERVVVWNAANRDEDVFADPQHFDIDRSPNRHIA  
FGQGGHHCLGAALARLELTILFEEMAKQVTNVRLTGPVRRVRSCVLRGIR  
ALPVELVT

>CYP1198B1 (2516006178) *Salinispora arenicola* CNT798

MSGELTDQRTAPGAGGNPLRSLMDHGIRANPYPLFGELREAGPTAVEDGS  
VVLFGHEYEHCSQILRHRDMGSDTSEAPSIKGFVVDDAERAGSSIFFMDQP  
GHGRQRKLVSFSFTPRIVKSFGPQITHIVDGLFEDFRDRGELDVVTDLAY  
PVSIGIICDLFGIPDDERDMLKEWSDDLALSTELPTLGAAIGVLNVFTRD  
EINRFGSVMAAHAYFADLIHRRRKNPGDDLVSLLATESNGERLTRFEV  
TSVLATLFVAAHESTTNLISGGILALLRNQDQMAVLRENPGIITNVVDES  
LRYDPPVHLAARMARATTIGGYDLDPGTIVVVLMAAGNRDPRAYENPDV  
FDVNRKIRNVSLAFGAGAHFCIGSGLAKLEAEIAISAFQRLKHPEVDES  
SLEYRRHIVVRGLEHMKVAFQP

>CYP211B19 (2518507718) *Salinispora pacifica* CNS860

MDASEAVALLMSPPGRRDPYPTYERLRAHGPPVATAAGFVVVTGYTEADTV  
LRNPRFGVMDDEERDGVFPHWQDSPAMMSISQSMIRANPPDHSRMRLAA  
GVFTPRRVAALREVVAQADELIDELIRAGRGGAPVDFLGSFAYPLPVTV  
ICALLGVPAADWAQFRRWASELTAVLEPEITPQELAVADAGATELRDYFT  
ELIAQRRRDPADDLTALVQAHDADGDRLSGEELLANLVLLL VAGFETTT  
NLLGNGLFVLLTHPDSATALRGQPELAPSYVEELLRYDSPVQLTSRTVRE  
SVTLGGVELPAGSWLLVLLGAANRDPARFTDPARFDPGRAQSPPLSFGAG  
AHYCLGAGLARLEAQVAFPLLLRRLPELALAGEPVRRSRLTLRGYETLPV  
TVGAVAADHGTPAGAALGTP

>CYP211C6 (2518508210) *Salinispora pacifica* CNS860

VPDIEGLLTRLYSAQGRQDPYPVYADLHAQAAIAALEPRPERQRVAAVAV  
GYDLVAAVLRDPEWFKQPPPDWRDQEILRILQSSMMFINPPDHGRMRHVF  
AGTFTPRRLGALEPVINRVTDLELLDRMADAGPGEVDFVAEFAYPLPARVM



AEFIGIPATELAWYRERVDRVDAFLDVAGKTPERLAAANAAGAEIERSFYR  
ELLAHRRRTPEGEDLISGLVEAVDAGGVELTEDELISNLIVLFNASFVTTV  
YLLSNGLPVLLAHPEVAAALASSPELAAGAVDEILRLQTPVHLLARAAPR  
DMVLGGVSI PQGQSVLLLLIAAANRDPAHFPDPDRFDPRRSSPPSLAFGLG  
LHYCLGAAVSRLEGRALPRLLSRFPRLRILEQPVYSGSLFLRGIDKLSV  
SPGGREHP

>CYP125A66 (2518508341) *Salinispora pacifica* CNS860

MTEPRIPVGFDFTDPAVLERRVPREEFAELRRTAPVWWNAQPKGSAGFDD  
DGYWVVTRYADVMAVSRDSEYSTRENTAIARFQPGTTQADREMQRVIMI  
NVDPPEHTKLRAIVSRGFTPRAINALRGSLGERAERIVRDAAGRGTGDFV  
TDVACELPLQAI AELIGVPQHRRKVFWDWSNQLIGYDDPAYGVDPLAASA  
ELLAYAMEMAHERQRNPSDDLVTQLVNAQIDGEHLTADEFGFFVMLLAVA  
GNETTRNAITHGMLAFLENPEQWELFKAERPRSAVEEIIIRWATPVNVFQR  
TALVDTTLAQAI SAGQRVALFYGSANFDES VFEEPERFDITRSPNPHLG  
FGGSGVHFCLGANLARLEIELIFNSIADHMPDIRKVADPQRLRSGWINGI  
REL PVR YH

>CYP245A11 (2518508780) *Salinispora pacifica* CNS860

MSSTTLPRFTLTGWNREDIVNPYPVYRRYREVA AVHRGEAGGDAPETFYV  
FSYDQVAQVLSSSCFGRGRSLDATAASVPVPADQKALRAVVENWLVMFDP  
PRHTELRSLLNRSFS PRIVTGLRPRIARIAQELLSRLGRQVETDLVEGFA  
APLPILVIAELLGIPAGRHWLRTNALALQEASSSRAGRDTAGYARAEAA  
AQEFTEYFREQVRLRRGSTGDDLLTILANAQLRGVPVSLDAVVGTA VHLL  
TAGHETTTNSLAKAVLALQAHPAVLEELRGADGLTADSIEEF LRYDPPVQ  
AVTRWTHQD TTLGGWEVPRGSRVVAL LGSANRDPARFPLPDALDVHRPAD  
RHLGFGLGIHYCLGATLARAELEIGLQTLLNGLPTLGYPAQYVDYADDMV  
FHGPSRLILVNPGERFCQ

>CYP244A5 (2518508784) *Salinispora pacifica* CNS860

MSATTNAELGEAPETSMPIDPGLFDCMPDLIAAARIAPVVRIPYLGRHAW  
VVCDELVKQAL THPKMGKDIALVPEWMRQPGLMVT AQPPPEYARAMIMS  
DGENHARIRRIHAPVLS PRNTERWGEQVADKVEGFLDELSKAAAGSNAEV  
DVVTNYTHKIPLAFISEMLGLPPAAEHRLRSITDIMLYSSDYAARREAIG  
GLFGAVEEWVRNP DGLRDGVITGLLAGSDGPAAVTEGEVIVWTLGMIIT  
GYETTGS LISTS LYEALRRPPHERPRTDEDITAWIEETLRVHPPFP HPTW  
RFPLEDIELGGYLIPKGAPVQV SIAAANRQPGEGADSFDAERRGHGHL SF  
GLGMHYCIGAPLVRLEAKIAVRGFLRRFPQARLSADTAVQWESEWMIRRM  
SSLPAVLS

>CYP107CT3 (2518509114) *Salinispora pacifica* CNS860

MTGASGDRTGQCPIALDHD FYADPHPAYRVIKENG NKPTPIVLKTGMAYL  
PPGLEAWLV TAYEDVEFVLRDPRFRK SIDEAMPLFAAQSGGTAAARGSL  
YNNMANNDPPVHTRLRKPLNAMFTSR SVAGRRDVRSAALETLEKVAGSQ  
TFDLVQDFAFPFSISVISRTLGVPDADRGT FHGWVQTITGDAPPEILRRD  
AGLMVEYLRGLIRGRRESAGNGTDDVLTLLATSLAEDEAVAQAYALLAAG  
YETTANLIVTGFLT LA AHPEQLRRLWSDPGLVPDAVEEMLRHQS PFNLSL  
YRYVTEPVELNGVRI PRGAIVFLAF AAAANRDECRFTEPDSFDITQPHRDH  
LAFGGGIHNCIGKHLARMEAQVAFETLIERCPGLAVHTPDEEFDWKASPT  
FRGLRTL RVGPGPAPGGWEREQ

>CYP163B20 (2518509518) *Salinispora pacifica* CNS860

VTATEAKYVGQVGSRNAPSTIDLADPATFAGHDLTNFWQRLRDEEPIYWN  
PPTGGRRGFWVLSRHADILEVYRDDTTFTSERGNVLVTLLAGGDAGAGRM  
LAVTDGPRHAELRKLRLRALGPRVLGPVCRAVRANTRQMIGEAAAANGECD  
FATDIASRIPMITISNLLGVPEADRASLLKMTKTALSADDESVSDTDSEM  
ARNEILLYFQDFVEFRKNPGEDVVSMLVNSSIDGVPLSDDDIVLNCYSL  
IIGGDETSRLTMIDSINTLAANPGQWRQLKEGRCDIDKAVDEVLRWASPS  
MHFGRTAVRETVIHGERIQVDDIVTLWGASGNRDERAFKRPEVFDLDRAP  
NRHLSFGHGHPHYCIGSYLAKVEISELLIALRDLILGFVIGAPQIRIRSNL  
LSGFSTMPVRFDADRTGLASEAREG

>CYP105BL3 (2518509551) *Salinispora pacifica* CNS860

MSSHSAAAPGPETATPLHTLAPELTFPQFERATPFDPPEAYTELSGRCPV  
APVRMADGKPSWLITSFEGVRAALSDPRLSSDMSPGFNRTGKPVDDL  
KDTLGAMDGERHRYRRLTGTGELTVRRAKAMRPVITQITDEALDQLAAAG  
PGADLVTHVALVVPSPRVACHLVGIPLSEYELFTGMAAKLMDSTSNADQIA  
ALQDMVSYFDTLVTDREHHDRDDLGHMVRRYLATGELDREMLIRLAWTT  
MAAGQETTAHMIIGLVAALLRHPDQLELLRREPHLMPGAVDELMRYLPMI  
QFGIPRVAMDDVEVDGQTVTAGEGVVALPPLANRDPVFERPDELDVRRN  
ARQHLSFGYGPHQCPAHALARLELEVYGRLLERFPTLRLADSDADLKVQ  
DEDIMYSVSELAVAW

>CYP208A26 (2518509643) *Salinispora pacifica* CNS860

MTVIADRGGVRPPGPPVTAGLRLLALLALGRDRLGMLTSAATEFGDVARLPV  
GPKRLYFFNHPDHAKHVLADNHANYAKGIGLVHARRALGDGLLTSGGELW  
RKQRRVIQPAFLNRRLAQYAGVVQGEATRLAERLATRVDPGPPVDVLDEMT  
RLTLGVLGRTLDDAELTGFGHVGESFAAVQDQAMFELETLSAVPTWIPLR  
RQRRFRARRRHLQEVVDVLAERGQNVGRDDVLSRLILSTRAEADAALG  
RQRLDELVTLLLAGHETTASTLGWSLYLLDQHPQLRERVRHEATSVLGD  
RVPGYADLHQLQYTAMVVQEAIRLYPPVWILTRKARAEDEVGGYRVPAGA  
DLLICPYTLHRHPRFWEEPGRFDPERFDPARLTNRPRYAYIPFGAGPRFC  
VGNNLGMLEATLVLAVLLRDLRLLEGLPGRAVVPEPMLSLRVRGGLPMMVR  
RAD

>CYP154M16 (2518509744) *Salinispora pacifica* CNS860

MPDRCPVLDPSGRDIHAEADRLRAQAPAVKVELPGGVHAWSSITSYDVVKR  
LLLDRNVTKNARNHWPKFINDIIPPDWEMISWVAMDNMVTAYGKHLVRLR  
RLIAKAFTAQRVETVRPQVEKLVDELDDGLAAETGEVVDLREKFCYPLPA  
LLIAELIGMTEQQRAQTAKAMDLMVDTTVSPDQAQAILTGWRTAMDELIA  
AKRREPGKDIASDLIAARDDENGGQLTDSELTDITIFAILGAGSETTINFL  
DNAVTALVTHPGQLELVRSRAGWDDVIDEVLRVQCPLASLPLRYAVTDI  
ELDGVTIPQGDPIILINYAAAGRDPALHGDGTAGEFDVFRENKEHVSFGHGP  
HYCLGAGIARLVATIGLSRLFERFDPDLRLAVPAEELQPLPTFIMNGHRAL  
PVRLVPAPAAATAV

>CYP208A21 (2518509756) *Salinispora pacifica* CNS860

MTTTSIDRRRPPGPPRAAALSMLLTMSRDRLGMMTAAARAYGDAAWLPVG  
HKALYFFNHPDYAKHVLTDNSDNYTKGIGLVHARRALGDGLLTSEGELWR  
EQRRVIRPSFRSGRAPDQASVIAEEVASLVERLRARAGGPPVNVVTEFTG  
LTLGVLGRTLDDVDLTALATVGDAFAAVQDQAMFELVTLTSAVPTWIPLTR  
QRRFRRARAELEIRIVDDLVARRGDVSGRDDVLSRLILSTGAEPDARVRRQ

RLRDELVTLLLAGHETTASTLGWTLYLIDGHPPVRERLRAEAVEVLGDRL  
PAYRDLPLDRFTTMVVQEAMRLYPVWLLPRRSRRADRVGPYRVFAGSDV  
VVSPYTMHRHPGFWEPEPDRFDPLRFDPNAADRPRYAYLPFGAGPRVCVG  
SNLGMMEAVIAVAMLCRELRLVRVPHTAAVPEPMLSLRIRGGLPMSVHLT  
D

>CYP107AX9 (2518509769) *Salinispora pacifica* CNS860

VTAQPAPVFDQRLLRDPHRRYNALRDQAPVHRVRTPDGAPAWLVTRYDDV  
RAAFIDPRLSVDKRFSGTGEHGSSLPPELDAHLLNRDPPDHTRLRLRLAA  
AAFTPRRVADLRPAVEKTVSTLLDGLAGNDHAELIGSLASPLPLQVMHEL  
LGLPTQTSVDFRTWTNTLLSADANQPAQSRSAMANMRRFLIEQVAHKRAQ  
PGDDLLTGLLCVREDDDGLTDDDELVAMLFLLMFAGYDNTAALIGNVIHAL  
LTDVELAEAVRTGSLAVDELVDGVLRWNPSPFLAVRRFAREPIITAGQTI  
PAGDRIWLCLASANRDPAHFTEPDEIGIADMRRPHLSFGHGIHYCLGAPL  
ARLQTTVAVAILFDRFPGIRLAVPVQDIQWRESFRLRGLVALPVSL

>CYP107AW6 (2518509782) *Salinispora pacifica* CNS860

VETVTGTSAPPPVPYIADPYPTLARIRANGPVSIHLSDEGVPMWVIARYR  
EVRAALADPRFGQDARRAQALADNRVAGVTLGGDIVHMLNSDPPDHTRLR  
RHVQGAFTARRVAAMRPLVERITTSLLDGLAGRKSVDLVQDLAFPLPLV  
ICELLGFPAEERNAYRSWSTAILTHDDDPAVFATALREMTDYIAVQLRLR  
RSRPGDDLLTELLAARDAGQLTDDDEIVGMVFLLLIGGHETTVNLLGTATL  
ALLRNPQDHRWLLANGHALPEAIDEFLRYESPVAMATLRFTTTPVTVDDV  
VIPAGELVLVSLGGANRDPDRFPDADRLILDRRDTGHLAFGHGLHRCLGA  
FLGKLEGEVALGALLRRHPKLALATEVRQLQWRDTIMLRGLESPLVSLHG

>CYP107AY7 (2518509966) *Salinispora pacifica* CNS860

MRAEPAPIPRSGARLGQEYDQLRKTGDVHQVLLPDTSLAWLVTSPELVSR  
ALADPRLALNRKHSRGGWSGFALPPALDANLLNLDAPDHTRLRLRLVGP  
SPQ RVAALRPRIERTAEELVDTVVATGSPVDLVTGYCTPLSVQVIADLLG  
VPEAGRTDLRAWTDMLTSYPPDRDAIRQAVVELHGYYVNLIEAKQQRPG  
DDL LSALVATEQEGDRLTRDELTSALFLILFAGYENTANLIAS TVLRLLD  
HGSLRGVRASEAIEETLRLEPPAPAAIRRFPIEETTIGGATIPAGDTVLL  
SIAAATRGTDGNSARLAFNGPHFCLGAALARVEAEEAITVLARRLPSLA  
LAVPGAPVRWRPTFRTHGPAELLVTW

>CYP162A8 (2518511013) *Salinispora pacifica* CNS860

MISPDLSDPFTFYQNGDPLPVWAE LRREHPVYDNRRADGTRI WAVMTHKLC  
TDMLTNPKVFSSANGMRLDSNPRVLARAAGKMLNVTDPQHDKIRKLVSS  
AFTPRTIRRLANMRATAGRAIDTAIADGGCELTRLAHKL PVS VICDLLG  
VPEQDWDFMAERTRFAWGSTAADDREEVEKVA AHT EIMAYFLDLAADRRK  
RPMEDLVSALVHGEVDGRALTD EDVLYNCDALLSGGNETTRHATVGGFLA  
FVMNPDEWSAIRQNRDLLPSAIQEIVRYTSPVMHSLRTATRDVEFGGINI  
RAGEYVVAWLPSANRDEQLFDDPDRFNIRRS PNRHLGFIQGNHYCIGAGL  
AAMELRVMFDELLNRVSEVRLAGPARRLR SNLLWGFDSL PVT FHV GAGR

>CYP105AB29 (2518511586) *Salinispora pacifica* CNS860

MTETASITTPGTSSTTTSGPASGQVTD AEFPVERGCPFSTPVEYEQIRDH  
SPLAKVRLTTGREAWWIAGHELGRAVLADRRFSSDRRRDNFPFVSTD PET  
RKQLQDQPTSMIGMDGA EHAQARRALMG EFTVRRMAGLRPRIQQIVDQHI  
DEMLSSEQRSADLVEALS LPVPSLVICELLGV PYADHDF FQAHSGLPIRH

TTPSEVRLRIQEELNTYL GALIDRKVTDPTDDLRSQIAKHHAAGTFNRT  
SLVSM AFLLLIAGHETTANMISLGVVGLLQHPDQLAMIKEDPEKTPPAVE  
ELLRYFTIADTVTARVATEDVQLGDTTINAGDGVVISGLAADHDPVFTD  
PDRIDLERGARRHHVAFGFGPHQCIGQTLARMELQIVFDTLFRRIPTLRLA  
APLDDIPFKSDAFVYGAEKLPVAW

>CYP161T2P (2518511063) *Salinispora pacifica* CNS860

MARCWAGVPYANWEQFRRWSDDAADMYDQERSVGGYQALRDYIAELAQVR  
LRVSGTDLISDLMESHRTEPEGFTLNQVVELGLTLLFAGHETTVTAIDNG  
AVLPATHPEQRRARLAGDPSLLDAAVEEILRGSVPRMNFARPD DTPAGA  
PPRWANTDLVIGDVTVRAGELVLLGLAHANADERFFAESARFDVGRV PNR  
HLTFGNPHFCAGAPLARLEL

>CYP1005A8 (2518511657) *Salinispora pacifica* CNS860

VSAVLFRSWTKTVGTHWPAVTRVADQQGTEHLVVTEHELVRQVLT DQVTY  
RPDNALDAVTPIPV PALRVLAGHRFRLPPTLANNGGVSHPAIRALVADAL  
HPAKVAAQR PWLTKLVAERVAAIGATLDSGGATDLHAELSADLPLLVLAR  
LVELPDAPVSAVKQFARAALALFWAPLDADRQLALADEVGRFHQVLR EFA  
DTGGGLAAALRATGHPPDVLVGALFFLLVAGQETTSQFLTLL LHLRLAGEP  
TVRAALRDGGVSVANVVEEGLRLEPPIVWRRVAAVDSTLGGTAVPAGTN  
VLLWLARAGRDPAIVPAPDEF RFGQRGSRRLAFAFGAGAHRC LGDQLARME  
AAVVVEQAAPLLDGISVVRAPWYPDNLTFRMPDAFVIRR

>CYP154M5 (2562129576) *Salinispora arenicola* CNY694

VEQSCPYKLDVTGRDIAEAGEAIRARGPVAQVELPGGVQGWSVTGYQAAR  
QVLADPRFAKDPQKWPAYTSGAIPPTWPLIGWLLMDNM TNDGADHQRLR  
KLVS HGFTPRQVERTRPLIVKIVNDLLDGLSTAGPDEVVDLKGRFATPLP  
ARVICDMFGVPEALRASVLRGAQVNV TSSISGEEAEANVEQWHRELL ELV  
EAKREKPD EMDASLLIAAKEEDGSTLSQEEVVGT LHLMLGAGSETLMNAL  
SYAVLGMLS NPGQYEMVRNGTSSWDDVIEETLRAQAPVAQLPLRYATEDV  
AVGGAVIKAGDPVLMGFTAIGRDP AVHGETAGDYDITRADKTHLSFGHGV  
HFCLGAPLARLELKIALPALFERFPNM TLAVRPDQLEPQGT FIMNGHREL  
PVRLGQPATVLA

>CYP105CT2 (2562129592) *Salinispora arenicola* CNY694

MNSPNHMPADSSSTAPARGCPMALSRGRVGLDVTDEISELRDGGRLGRIT  
TAFGQEATLITRYDEVRAQMADSAVFN VAGVSP PVLVDGGFDTESVRRR  
RTVGNLIMLDPPEHTRLRRMVAAWFTTRRVERLRPRVVEIINAALDEMER  
SGPPVDLVAMFAKTVPITVICELIGVPEELRERYRRRAERAASASAVSTP  
LDELRLREAGWVSRELIEYHRENPSDDIIGMLLREHGADSHDDGITDDE  
LVGLANALLIAGHETTTQMLSMGTLALLRHPDQLALLRDDPSIVAGAVEE  
LLRYVGVLHGGFVRVATRDTRLGGHRIHAGELVVPALTAANRDPRL LDG  
DRLDITRPPTSHVAFGHGVHFCIGAPLARMELREAFPALLRRFPGLRLAV  
PDSELEFTQGT TVYSLRGLPVTW

>CYP125A41 (2562129657) *Salinispora arenicola* CNY694

MTEPRIPAGFDFTDPEVLAHRVPREEFAELRR TAPVWWNAQPRGSAGFDD  
DGYWVVTRYADVM TVSRSDTYSTRENTAIARLRPD TTREDIEMQRVIML  
NVDPP EHTKLRAIVSRGFTPRAINALRGSLAERA EHIVRDAAVRGVGD FV

TDVACELPLQAI AELIGVPQHRRKVF DWSNQLIGYDDPAYGTDPLTASA  
ELLAYAMEMAERQRSPSDDLVT KL VNAQIDG EHLTTDEF GFFVMLLAVA  
GNETTRNAITHGMVAF L DNPEQWERFKAERP KSAVEE IIRWATPVNVFQR  
TALVDTV LGGQAI SAGQRVALFYGSANFDEAVFEDPERFDITRSPNPHLG  
FGGSGAHFCLGANLARLEIELIFNSIADHL PDIRKVAAPQRLRSGWINGI  
RQMPVRYR

>CYP211C1 (2562129803) *Salinispora arenicola* CNY694

VVDVEGLLARLYSAQGRQDPFPVYADLHAQGPIAALPPEPERRRVA AVAV  
GYDLVGAVLRDPEWSKAPPPGWTEQEILRTLQTSMMFINPPDHGRMRHVF  
AGTFTPRRLGALEPVVNRVADELLDRMADAGAGGLDFVAEFAYPLPARVM  
AEFIGIPETELDWYRERVDVIDAF L DVAGKTPQRLAANAAGAE LRAFYG  
ELLAHRRRTPEGDLISGLVEAVDAGGVALTEDELISNLIVLFNASFVTTV  
YMLSNGLPVLLAHPEVAAALATDPVLTAGAVDEILRLQAPVHLLARAAPR  
DTV LGGVPI PQGQNVLLLI AAANRDP AHFPDPDRFDPRRSGPPSLAFGLG  
LHYCLGAAVSRLEGR LALPRLLSRFPRLRIMEQPVYSGSLFLRGIDKLSV  
SPGEGSTRE

>CYP166A4 (2562130285) *Salinispora arenicola* CNY694

MTDAISFELPWARTDKFDPPAVFDALREQRPLARMRYPDGHIGWIVSSYE  
LVREVLGDPRFSHSCAVGHFPVTHQGQVIPTHPQIPGMFIHMDPPEHTRY  
RRLLTGEFTVRRTSRLTGHVEGVAAEQIEVMREHGAPADLVATFARPLVL  
RVLSGLVGLPYGERDRYLHAVTLLHDAEADPAEAAAAYEQAGAYFAEVIE  
RRRRQPEDDLISTLVGDGELTGEELRNIVTLLLFAGYETTESALAVGMFA  
LLHHEDQLARLRADPTKIDAAIEELLRYLT VNQYHTYRTASEDIELHGEV  
INKGDSVTVSLPAANRDPARFVCPADLDIDRETSGHVAFGFGI HQCLGQN  
LARVELRAGLSALLRAFPNLRLAVPADEVPLRLQGSVFAVKNLPVCW

>CYP1005A1 (2562130462) *Salinispora arenicola* CNY694

VSAVLFRSWTKTAGTRWPDVTRVADQSGTEHLVVTRHALVRQVLT DQATY  
RPDNAL EAVTPVPVAALRVLAGHRFRLPPTLANNGGVSHPAIRALVADAL  
HPTKVAAQR PWLTEL VADRVATIRTTLD SGGPVDLYADLTADLPLLVLAR  
LVELPDAPVNAV KQFARA ALELFWAPLDADRQLALADEVGRFHQVLR EFA  
DTGGGLAAALRATGHPPDVLVGALFFLLVAGQETTSQFLTLL LHRLTDEP  
TIRAALRAGSISVADVVEEGLRLEPPIV TWRRVA AVDSTLGGTTVAAGTS  
VLLWLARAGRDP AVVAAPDEF RFGQRGSRRLAFGAGAHRC LGDQLARME  
ATVVVEQATPLLDGVTVVRPPWYPDNLTFRMPDAFVVRR

>CYP208A12 (2562131030) *Salinispora arenicola* CNY694

MTLDTITPRVPLGPRTAALRMLLV MKRDR LGMLTSAAARYGDASRLPVG  
HKALWFFNHPRYAKHVLADNSANYHKGIGLVHARRALGDGLLTSEGD LWR  
KQRKVIQPAFQSRRIAQQAGMIAEEAFALVERLRARAGTGPVELTAE L TG  
LTLGVLGRSLLDADLAGFDSIGDSFATVQDQAMFELET LNAVPMWIPLPR  
QIRFRKARRKLQAVVDTLVDGRAGSLADRVDVLSRLILSARGEADPRVGR  
ERLRDELVTLLLAGHETTASTLGWTL SLIDRH PGVWERLHAEAVEVLGDR  
LPEYDDLRLRLRYTVMVVEEAMRLFPPVWLLPRRALAPDTIGEYRV PANAD  
VVISPYTLHRHPEFWPNPERFDPERFAPGQAADRPRYAYLPFGAGPRFCV  
GNNLGMMEAVFVIALLCRHLRLTGVPGYRLVPEPMLSLRIRGGLPLVVRP  
VS

>CYP211B2 (2562131096) *Salinispora arenicola* CNY694

MDVSEAVAVLTSPSGRLDPYPTYEQ LRAHG PVSRTTAGL FVV TGYAEADM  
VLRDPRFVVLDDDLRDDVFPHWQDSPA IKS IARSMLRTNPPDHSRIRRLA  
AGAFTPRRVAAMREVVTAQADELVD EMI RAGRDGARVDFMDMFAYPLPVA  
VICALLGVPAADRSRFRRWAGDLTG ILEPEITPEELAGADAGADELRDYF  
TGLIEQRRRAPADDLTALVQAHDADGDRLSGEELLANLVVLLVAGFETT  
TNLLGNGLVVL LTRPEAAAALRDQPD LAPGYVDELLRYDSPVQLTTRTVR  
ESVSFAGTELPAGSWLLVLLGAANRDP RRFPDPARFDPWRAQSQPLSFGA  
GPHYCLGAGLARLEAQVAFPLLLRRLPELALAGRPSRRRLTLRGYETLP  
VTVGAVTADRGT PAGVAPGTP

>CYP105W3 (2562131246) *Salinispora arenicola* CNY694

MTGYQDPPTGDQPGAPVPSGSTDPGLDAFPLPRRC PFSPPAEYARLRAEH  
PVVRLPMLGGDTAWVVS RHADVRQVLGDPRMSADRRRP GFKFAPTTEGQ  
RQASFANFRPPLNWM DPPEHAICRRQIVDEFSARRVRQLRTLVERVVD A H  
LNALAAAAPGADLVSTFAYPVPSQV ICEVLGV PYGEHGF FERRSTLMFRR  
STPADERARCAREIREFLDVVVT DKERRPGDDVLSRLLYRQRSAGGVDHE  
AVVSMAFVLLVAGHVTTSNMLALSVLALLTHPARLARLARAE PKRFPAAVE  
ELLRYFTVVEAATARTATAEVTIGGV TIAAGEGVVALGQAANRDP RVFEH  
PDEFDPDRDARAH LAFGHGRHICPGQHLARLEMEVALSRLFRRLPGLRLT  
MEVSDLPLKEDSNIFGLYALPVAW

>CYP248A2 (2562131254) *Salinispora arenicola* CNY694

VLADAVTAFDPTAVDVRRDPYPSYHWLLRHDPVHRGAHQVWYVS RFADVR  
AVLGDERFARTGIRRFWTDLVGPGLLSQIVGDIILFQDEPDHGR LRGVVG  
PAFSPSALRRLEPTIEATVNDLLRPARALGAMDVVADLAYPLALRAVLGL  
LGLPAGDADAVGRWSRAVGRTLDRGATAEDMRRGHAAIAEFADYVERALA  
ERREDGADLLALMLAAHRSQ LMSRNEIVSTVVT FIFTGHETVASQLGNGL  
LSLLDHPEQSELVRRQPHLVSQAVEECLRFDP AVQSNT RQLAADVELHGR  
RLRRDDVVVVLAGAANRDPGRYDRPDEFDIRRDPVPSMSFGAGMRYCLGS  
YLARLQLRTALGAMVALPDLRLVCSPNELAYQPR TMFRGLTRLPVAFTPA  
G

>CYP107FS2 (2562131316) *Salinispora arenicola* CNY694

MPVPQGEQNLTTTEVFADPKALFATLGSRQPLHRISLPDGM PAVLVTGNRE  
ARQALSDPRLVRSITAAAPELHKYHPLASDDYALSRHMLFADPPDHGRMR  
KLTVSTAFTRRRVEQMRPRIQQITDDLIDVVA AKGEADLVEALALPLPIAV  
ISEMLGVFPADRSEFERHA EVL TGINASSGFDAIIAAGRWFDEYLAGLVQ  
QRRREPQDDLISGMLAAQDKGDR L TDVELRSNALLLLSAGFETT VNLVAN  
GLLALLRHPEAMAALRSEPNLMTTAVDELLRYDSPVSCVTYHFAQE PVEI  
GGFEIRSGEHVVI AAAAAANHDPTVFADPSRLDLRRQGSQILSF SHGIHF  
CLGAPLARLEGEIAFGTVLRRLAGLRLAVPTDSL VWKASFVLHRLERLPV  
TFTPDRDPNPIDSVHTV

>CYP105CN1 (2562131317) *Salinispora arenicola* CNY694

MAAPAPQATQSTTPHPPSYPLPRECPYRPSAGTARLRDAGPVSTVRLYDG  
RTAWLVTGAAEARALLADSRVSNRADFPNYPVM DERHLSMRATREMAREE  
EGGFAAALFGMDPPEHTRQRQ LLLPRFTVRQVAARRPAIQRIVDEHLDAM  
EANGSPADLVSAFATPVPTMVVCTHLGV PYQDRTRFEPAVAGLFE PD RAD  
AAMAELTAYLHQ LIETKQSEPGDGVIDHLIANHLRPGAIDRAELVAIASA  
ILVAGTVTTSSAIALGTLALLTAPGQYAALVDNPDLPVGAVNEILRYLSL  
VEQLARVATEDIEIGGKLIRAGDGIIVSFAAGNLDPNVTTHPDRLDVALP  
PTNHLAFSHGIIHHCIGQN LALLELDIAFRALVNRFP TLR LAVPAEQLP TY  
FAGDVPRLACL PVTW

>CYP105CP2 (2562131319) *Salinispora arenicola* CNY694

MTKSMPVQDLPAFPIPRECPYRPSAQHVSLRSGGPMARVRLYNGRTAWLV  
TDSA HARAVLS DYRRVSIKPYHGNYPLLNEEFKVVDSGYADVLFVGDPP  
EHTRQ RQMIMPSFTLRR TAVLRPDIQRIVDDKLDEMMRHGAPGDLVTEFA  
QPVP SPMVMSFLLGVFWEDHEEFETPAHKLFVPELAEEATELGAYLERLI  
QKKEQ PGGT PGGTGLLDD LIRDHLRAGALSRDELVHIAMAMLVAGTDTT  
NVISL GTLALLDNPDQWEALRDNPDDELIPGAVEEILRYTSLIEAFARVAV  
SDIELNGAVIKEGEGILISSAGVNFDPALAPDPGRFDIRRP RPSPSFSFSH  
GIHRC PGDNLARLELEIAFRSLVTRMPNLRTAKPIDQIPSNNDGTLQRL  
YELPVVW

>CYP105BL2 (2562131414) *Salinispora arenicola* CNY694

MSSHAAAAPDPETATPLHTLAPELTFPQFERSTPFDPQAYTELSGRCPV  
APVMS SDGKPSWLITSFEGVRTT LSDPRFSSDM SHPGFPNRTGKPVDDL  
KDTLG AMDGERHRYRRLTGELTVRRAKAMRPVITQITDEALDQLAAVG  
PGADLVKHVALVVP SRVAYHLVGIPSSDYELFTGMATTLMESTSSADQFA  
ALQNMVSYFDTLVTDREHHDRDDLGRMVRRYLATGELTRDMLITLVWTT  
LAAGQ ETTAHMIGLVAALLRHPDQLELLRREPHLLPGAVDELMRYLPMI  
QFGIP RVAMDDVKVDGQTVTAGEGVVALPPLANRDP AVFERPDELDVRRN  
ARQHLTFGYGPHQCPAHALARLELEVYGRLLERFPTLRLADSDADLKVR  
DEDIMYRVSELAVTW

>CYP1051A4 (2562131535) *Salinispora arenicola* CNY694

MATDAAITRARTVPAWKALPAAVRDTHRALVDVGNWSDGDVVRVSLGVSR  
PYVVTNPAHVQEV LHERAAIYPRGDDTALWRSVRKLVGDGILAEGDVWAA  
SRRVLAPMFRPVRINAMVD TMADA IAGAVDDLHGAAVAGTPIDVGRELSR  
IVCSAIMRVFFADRITVQDALRIMKAQETIVTAMAPRILAPLPWWIPMP  
GDRRFRTAVRSIDNILLPVL RQAQRQPDDGDDL SRLVRARADDGQILSE  
KMRDDLVSMVAVTTETSTVVL TWLWPLL ANHPDVADRLYDEIDRVVGGG  
PVRGDHLAELTYTRMVLDELLRLYPAGWILPRRAATDILGGVRINKGAT  
VILSPYVTQRMTAWWGPTAEAFDPERFAAGQEAADGRHRYAYYPFGVGMH  
RCLGEHLFNLEAILIVATLLSRFRFALTDTSM PGVKVAASTRPARTVEMI  
LKPVAPIPAR

>CYP244A4 (2562131806) *Salinispora arenicola* CNY694

MSTTTNTDLTEAPETNMPVDPGLFDCMPDLIAAARVAPVVRIPYLGRHAW  
VVCDRELVKQALTHPKMGKDITLVPEWMRQPGLMVTAQPDPEYARAMIMS  
DGENHARIRRIHAPVLS PRNTERWGERVADKVEGF LDELSQAGSGGSAEV  
NVVTNYTHKIPLAFISEMLGLPPEAEHRLRGITDIMLYSSDYAARREAIG  
GLFGAVEDWVRNPADLRDGVITGLLAASDGPDAAVTEGEVIVWTLGMIIT  
GYETTGS LISTS LYEAIRRPPHERPKTDEDITAWIEETLRVHPPFPHP  
RFPLEDIELGGYLIPKGSVPQVSIAAANRKPGE GADSFEAERRGHGHL  
GLGMHYCIGAPLVRLEAQIAVRGFLRRFPQARLSAESAVQWESEWMIRRM  
SVLPAVLS

>CYP245A7 (2562131810) *Salinispora arenicola* CNY694

MPSATLPRFALTGWNRENIVNPYPVYQRYREVAPVHRGEPGGDAPDTFYV  
FSYDEVVQVLSSSCFGRGRSLDAAQASVPVPAEQKALRAIVENWLVFMDP  
PRHTELRSLNRSFSPRIVTELRPRIARIAQELLSRLGQQVDVDLVESFA  
APLPILVISELLGIPEERRAWLRANAMALQEASSSRAGRVDVDGYARAEVA

AQEFTEYFREQVRLRRGSAGGDLITILANAQERGAPVSLDAIVGTCVHLL  
TAGHETTTNSLAKAVLALREHPAVLDELRGADGLTTDAVEEFLRYDPPVQ  
AVTRWAHQDQTTLGGCDVPRGSRVVALLGSRNDPARFPLPDVLDVRRPAD  
RHLSFGLGIHYCLGATLARAELEIGLQALLDGVPTLGYGTQHVDYADDLV  
FHGPSRLVLVNLGER

>CYP105AB35 (2562132491) *Salinispora arenicola* CNY694

MTETASSRLTDTEFPVQRQCPFAEPVEYEQIREQSSIAMVRLTGGGEAWW  
ISGHEQGRAVLADRRFSSDRKANFPFISTDPATRKRLYAQPLSMISMDG  
AEHAQARRALIGEFTVRRRLAALRPRIQQIVDQCIDEMLTDDQHCVDLVKA  
LSLPVPSLVICELLGVYDDHDFQEHATLVRRNAAPEVRQHSIDELNA  
YLGALIDRKLADPDDDLLGRQIARQHQDGTFRSSIVSLAFLLLLVAGHET  
TANMISLGVVGLLQHPDQLTMKNPDPMPLAIEELLRFFTIVDSVTSRV  
ATEDVRFQDGTINAGDGVVVSGLSADWDPTVFADPDRLDLERGARRHHIAF  
GFGPHQCIGQNLARLELQIVFDTLFRRIPTLRRLAAPLDKIPFKTDAAIYG  
ARELPVAW

>CYP107EU2 (2562133277) *Salinispora arenicola* CNY694

VTVGQTLPLVYSPEFTRDPYAVFARLREQAPVCRVTTHRGMSAWMVTRY  
ADVRALLADSRLAKDGNRIGELMPRHSLKTGAATGFPFGLTTNMVNSDPP  
DHTRLRHLVGREFTGHRVESLRPRIEEIVDDLLDGVAAACGDEADLAEILS  
RRLPIAVIGELLGVPEADRAEFFRWADTLYGGTASPEALGQAYNAIVDYL  
GRLCDAKRDPADLLTALVQVSADEDRLSREELVSMALLLVAGHETTS  
KQISNGVLALLLDPEQLKLLKAQPALAAAEEELLRFEGPSLSASLRFTT  
EPVEVAGVVIPEGEFVLLSLASGNRDPQKFPDPDRLDITRSTQGNLAMGH  
GIHHCVGAAALARLELEIVLSRLVARFPQLQLAVAADDLEWLVNSFFRAPL  
HLPVSLGR

>CYP107Q4 (2562133401) *Salinispora arenicola* CNY694

MTTTAETSATIDLFSPEVVADPFGWYARLREETGPTTGTLNIGTMMGGP  
EMWLVTTRYEDVRQVLTDPRLTNPPADSPLEDIRAGVFKRDLFPDLPW  
MANLLNVSDGEDHTRLRKLVSYALTAHRIGKLRPRVEKITADLLDKLAED  
GKDGSPVDLVEEYCYPLPVTVICELVGIDEPDRAHWRAWGDSMATMNGER  
IPTTLVKCIELARELIEKRAEPQDDLVTALVQAQAEQDNRVSDDEIIGI  
LFSLVTAGHQTTTYLIGNSVILLLENPDQLARLKENPSMWPQAVRELQRL  
GPIQFAQPRFPSEDIELGGVTIPRGAPVAPLLAANTDPRRFPDPNKLII  
DRLAVGSESHLGFQKGIHRCQHLAYQEAQVALQGLFTRFPDLSLAVPR  
EEIPWILRPGFTRTRTLPLKLV

>CYP105G7 (2562133402) *Salinispora arenicola* CNY694

LTIIETTETPPADDTLRAPLPRQFMQRDDPSKLPALAAALAEQAPVGRSTL  
PDGDPFWMVSGYDEARAVLSDPRFSSDRFRYHPRFKKLSGQLGERLRNDK  
ARAGSFINMDPPEHTRYRKLLTGQFTVRRMRQLTVRIEQIVTEQLDVMLA  
KGNSADLVSAFAVPVPSLMICELLGVRYEDRTEFQRRAGLLQTDLPKIQ  
AVENLEAQRAFMRQLVTDKRRNPADDMISGLVHHAGADPPLTDDDELVGIA  
TLLLFLAGLDTTASMLGLGMFMLLQRPQMAVLRDDPPRIGDAVEELLRYL  
TVVSAGLFRFAKEDVVLGDEHIIPAGSTVVVSLMAANRDGRHWPEPETLDV  
TRVRSSHLAFGHGVHQCLGQQLARIELTVGITELLRRLPNVRLAVPPADV  
PLRNDMITYGVHRLPIRWDTF

>CYP105CH2 (2562133674) *Salinispora arenicola* CNY694

VSSLPLPTYPKLRDPADPLLPADYLAIQSEKPIAKVLLPSGRPTWLITG  
HALARQVLTEPCVSVDRKHNFYPYPVNPDAVVAQVARWTYILLGDDPPL



HTERRRLLISEFSVRQAQAMRPRIQQLVDFHLDQLIAAGPGADFSKHFAM  
KVPSAVICEMLGVPFADHDYFQERTALQLRRDVAVADQKQAIDELLAYFE  
QLIQRKSSHPGDDLLSRLIVSNRETEAFDHEALVALGLLLLLVGGHETTAN  
TLTLATATMLERPEVAEQLRTPSLMPSAVEEFLRYFSVAVAVSRIATAD  
LQVGDLVRAGESMLLVNLTARDGTVFPEPHRLDIHRNARNHLAFSHGI  
HQCMGQNLARVEMQIALDTVLRRLPGLHLVTPFEELPFKYRHLVWGIEEL  
KVAW

>CYP107AX1 (2562133835) *Salinispora arenicola* CNY694

MTSRPTAVFDQCLLRDPHSRYNALRDQAPVHHVLTDPGAPAWLVTRYNDV  
RAAFTDPRLSVDKRFSGTDGEHGSSLPPELDAHLLNRDPPDHTRLRLRLAA  
AAFTPRRVADLHPAVERIVSTLLDGLAGHDRAELIGSLASPLPLQVMHEL  
LGLPTQANIDFRTWTNTLLSADANQPAQSRAAMANMRRFLIEQLAHKRAQ  
PGDDLLTGLLAAREDDRLTDELVAMVFLLMFAGYDNTAALIGTVTHAL  
LTNAELHEAVRGGSLALDELIDEVLRWNPAFPLAVRRFAREPIAIAQGTI  
PAGDRIWLCLASANRDPAQFTQPDELGIVGLRRPHLSFGHGIHYCLGAPL  
ARLQTTIAVTSLNRFPEMRLAVPAHDIRWRESFRLRGLIALPVYL

>CYP107AY14 (2562134081) *Salinispora arenicola* CNY694

MKAEPPTPIPRSGAGLGQEYDQLRKTDGVHQVLLPDASLAWLITNPEVAAR  
ALADPRLALNRNRNSRGGWSGFALPPALDANLLNLDAPDHTRLRLRVGPAF  
SPQRVAGLRPGIRRAAEHLLDTLVATSRPTNLVTGYCNPLSVQVIADLMG  
VPEAGRTNLRAWTDMLTSYPPDRDAIRQAVTELHGYYVDLIDLKQQQPG  
DDLLSALVTIEQDGDRLRDELTSLAFLILFAGYENTANLIASAVLWLLD  
HGGLNEVPPIAEAEIEGTLRDEPPAPVAIRRFPTEDIIIRGLTIPAGDTVLL  
SIAAATRGADGNAARLAFGNGPHYCLGAALARVEAEALTVLARRLPGLT  
LAVPPAQVRWRPTFRTHGPAELLVGW

>CYP107AW7 (2562134226) *Salinispora arenicola* CNY694

VETVTGTSTPPPVPIADPYPTLARIRANGPVSIHSDGIPMWVIARYR  
DVRAALADPRFGQDARRAQALADNRVAGVTLGGDIVHMLNSDPPDHTRLR  
RHVQGAFTARRVAAMRPLVERITTSLLDGLTGRTTVDLVQDFAFPLPMLV  
ICELLGFPAEERNAYRSWSTAILTHDDDPAAFATALREMTDYIAVQLRIR  
QTQPGDDILTELLAARDAGQLTDEEIIIGMVFLLLIGGHETTNNLLGTATL  
ALMRNPDQHRWLLANQHALPEAIDEFLRYESPVAMATLRFTTTPVAVDDV  
VIPAGELVLVSLGGANRDPDRFPDADRLILDRDRTGHAFGHGLHRCLGA  
FLGKLEGEVALGALLRRHPRALALAAEVRQLRWRDTIMLRGLESPLVSLHG

>CYP1198B2 (2562134326) *Salinispora arenicola* CNY694

MSGELTDQRAAPDVGGNPLRSLLDHGIRANPYPLFGELREAGPTAVEDGS  
VVLFGHEYEHCSQILRHRDMGSDTSEAPSIKGFVVDDAERAGSSIFFMDQP  
GHGRQRKLVSQSFTPRIVQSFGPQITRIVDGLFEDFQDKGELDVVTDLAY  
PVSIGIICDLFGIPDDERDMLKEWSDDLALSTELPTLGAAIGVLNVFTRD  
EINRFGSVAMAAHAYFADLIHRRRKNPGDDLVSLLATESNGERLTRFEV  
TSVLATLFVAAHESTTNLISGGILALLRNQDQMTVLRENPGVITNVVDES  
LRYDPPVHLAARMARARTTIGGYDLDPGSIVVVLMAAGNRDPRAYENPDV  
FDVNRKIKNVSLAFGAGAHFCIGSGLAKLEAEIAISAFQRLKNPEVDES  
SLEYRRHIVVRGLEHMKVSFQP

>CYP105CP2 (2518454126) *Salinispora arenicola* CNP193

MTKSMPVQDLPAFFIPRECPYRPSAQHVSLRSGGPMKVRLYNGRTAWLV

TDSA HARAVLS DYRRVSIKPYHGNYPLLN EEF EKVVDSGYADV LFGVDPP  
EHTRQRQMIMPSFTLRRTAVLRPD IQRIVDDKLD EMMRHGAPGDLVTEFA  
QPVP SMVISFLLGVPWEDHEEFETPA HKLFVPELAE EATTEL GAYLERLI  
QKKEQPGGTPGGTG LLDLIRDHLRAGALS RDELVHIAMAMLVAGTD TTT  
NVISLGT LALLDNP DQWAALRDN PDELIPGAVEEIL RYTS LIEAFARVAV  
SDIELNGAVIKEGEGILISSAGVNFDPALAPDPGRFDIRRP RPSPFSFSH  
GIHRCPGDNLARLELEIAFRSLVTRMPNLRTAKPIDQIPSNNDGTLQRL  
YELPVVW

>CYP105CN1 (2518454128) *Salinispora arenicola* CNP193

MAAPAPQATTSTTPHPPSYPLPRECPYRPSAGTAHLRDAGPVSTVRLYDG  
RTAWLV TGAAEARALLADSRVSNRADFPNYPVM DERHLSMRATREMAREE  
EGGFAAALFGMDPPEHTRQRQLLLPRFTVRQVAARRPAIQRMVDEHLDAM  
EANGSPADLVSAFATPVPTMVVCTHLGVPYQDRTRFEPAVAGLFEPDRAD  
AAMAE L TAYLHQ LIETKQSEPGDGVIDHLIANHLRPGAIDRAELVAIASA  
ILVAGTVTTSSAIALGTLALLTAPGQYTALVDNPD LVP GAVNEILRYLSL  
VEQLARVATEDIEIGGKLIRAGDGIIVSFAAGNLDPNVTTHPDRLDVALP  
PTNHLAFSHGIHHCIGQNLALLELDIAFRALVSRFPTLRLAVPAEQ LPTY  
FAGDVPR LACLPVTW

>CYP107FS2 (2518454129) *Salinispora arenicola* CNP193

MPVPQGEQNLTTTEVFADPKALIATLGSRQPLHRISLPDGM PAVLVTGNRE  
ARQALSDPRLVRSITAAPELHKYHPLASDDYALSRHMLFADPPDHGRMR  
KLVSTAFTRRRVEQMRPRIQQITDDLIDVIAAKGEADLVETLALPLPIAV  
ISEMLGVFPFADRSEFERHA EVL TGINASSGFDAIIAAGRWFDEYLAGLVQ  
QRRREPQDDLISGMLAAQDKGDRLTDVELRSNALLLLSAGFETTVNLIAN  
GLLALLRHPEAMAALRSEPNLMTTAVDEL LRYDSPVSCVTYHFAQEPVEI  
GGFEIRSGEHV VIAAAAANHDPTVFADPSRLDLRREGSGQILSFSGIHF  
CLGAPLARLEGEIAFGTVLRRLAGRLAVPTDSL VWKASFV LHR LERLPV  
TFTPDRDPNPIDSVHTV

>CYP125G6 (2518454168) *Salinispora arenicola* CNP193

VPTLLNEHVS YDGA AIAIVDS DGATSWIRLA ERVNRVHLLRAHGLDTGD  
RLACVTGNRRETF EVLLAALHTGVTVPVNWHLTVTEIGHILSDSGSRVV  
ITEELHV KAVAAAADGMAGPVAGLV LGDREIEGF AAVEP LLAASPAEPE  
GOVCGATMLYTS GTTGRPKGVVNNLFVTGAPYARVGRLCDYARSVLGVPR  
RERMLLDGPWYHSSQLFFALLSL LQGSRLVIRPYFDPAATLKTIDDHRIT  
VTHLVPTQLVRLLRVDALTRQMFSGASLR RVWHGGGPCPPEVKRSMIDWW  
GPVLVEYYGATEGGVVT LIDSAEWLARPGSVGRAVPPSEVVVVDDGGQPV  
AAGQTGQVFFRRRTGNRFHYHNAPEKTQAAYLAPDTFTYGEVGHVDEDDGY  
LFLTGRAQDMIVSGGVNVYPAEVEAALLRHPVVRDAAVIGVADDEFGERV  
VGIVVPETAVDPDDLATHLDAHCRVSLAGFKVPRTYRVVESLPRDETGKL  
RKDALRSKFGWLSGAAMTVPRPATGQPTAHRPDIAHPTTYVSGVPHDEFA  
RRRRDEPVGWVAEPVLTRHTAAGRTATRGSGFWAVTRYEDVVAASRRVTD  
FSSAAKGAF LTPRT PADLQQA RQLLVNMDDPHHARLRKLVT SVFTPRAV  
RGLLASIDAHA AALVAKVVAAGEFDVVTDLAAELPLLVLADLLGV PKQDR  
ALLYGWSNHLVGFD DPDFGGGDIDAYRTAMAEAFQYALNLGVERRARPTD  
DLVSLLANAEVDGTR L TDREFCNFWLLL VVAGNETTRHLVAGTMQALTEH  
PGE CARLVEGRVP TESAVEELLRWVTPIMQFRRTATRDTEIGGQAVTAGE  
KVVLYYTSANRDATVFAEPDRLDLGRTPNRQLSFGIGPHYCLGAHLARAE  
LTALLRVMSPHLGSLQLTG PVSRLASNFVNGVKAMPAVIGSR

>CYP154M15 (2518454193) *Salinispora arenicola* CNP193

MNDKCPFAALDVTGQDLHGEEARLREQGPAVLVELPGGVKAWSINRYEVI  
RELLMDRRVTKNARKHWPAPFIKGEIPPDWEMISWVAMDNMVTAYGKDHVR  
LRKLVGRAFTQRRADALRPQVVALSTKLLDDL GATPPGEVVDLRERFAYP  
LPAMLVASLIGMSEAALAACSKVIDMMVHTNVSPEEAQAVLRGWRAAMAD  
LIESKRRTPGEDITTDLIAAREEDGSRLSEAELADTIFAILGAGSETTIN  
FFDNAITALLSRPGQLQLLRTGAVTWDDVIDEVLRVESPLAHLPLRYAVE  
DIELDGVTI PQGDPILVNYAAAGRDPALHGGTADEFDLARGDKTHLSFGY  
GPHYCLGAGIARMVATIGLSMLFERFPDL SLAVPATELKRLPTFIMNGHQ  
TLPVRLTAHAR

>CYP107FJ2 (2518454212) *Salinispora arenicola* CNP193

MSETLSTSVLLADAAEQRAWRAKLRGAGPVHRITTSGETGWLIVGHEEA  
RNALVDLRLQGRATATVGHGRMPEDLERALNSHMLNVGPPDHTRLRRLVS  
AAFTRRRIEQMRPRIQELTDELLDGLAGADEADLVAGLALPLPMRVLVDL  
FGIPAEDCADFNWTKVLTSAGAVDLDRLTAAAGEMVAYLRGLLDRKRQV  
PESDLLSALVAVRDGADRLSDELTSMVYLLLTAGYETTVNLIGNGLLNL  
LANPEQLVAFKADPDLLPQVVEEAMRFDSPVQIAVRHSTEPVEIAGQAIP  
SGALILVSLWANRDPDRFTEPEAFRVD RQDNPQLGFGYGFHHCIGAPLA  
RMEGTIAIGTVIRRFPALRLAHPAGSLTWRASMVMHGLTALPVHLR

>CYP154M20 (2518454219) *Salinispora arenicola* CNP193

MERCPYVLDRAGRDLHGEEAKALRARGPVTLVELHGGYTAWSVTSYEIAKQ  
LLVDPRI SKNKTETWPEFREGKVPQDWELYTWVAMDNMQTRDGEEHDLRL  
KLVAQAF TTRQVAKVRPMIEDIVDRLLDDLEKVPAGEVVDIKGRYFYPLS  
TILVCDLLGIPEADRAEALHGT VVNARTTNSAESEANLHQWQSALSKLV  
ETKRREPGNDITTLIIKAREDEQAPLTDDEVIGSLHLLIGGGTETTSNVL  
CNTLIDLLTHPDQMAMIRSGAVGWEEAWEVEVRKDGAVGSMPFRCANADI  
EIGGV TIAKGDVLIN YAAAGRDPERYGDTTAEFDITRADKTNLSFGYGR  
HRCLGPALATMEAMISLPALFERFPDLVLAVPREELKPQGT FVFNGYAEV  
PMLLRS

>CYP248A2 (2518454241) *Salinispora arenicola* CNP193

VLADAVTAFDPTAVDVRRDPYPSYHWLLRHDPVHRGAHQVWVVS RFADVR  
AVLGDERFARTGIRRFWTDLVGPGLLSQIVGDIILFQDEPDHGRLRGVVG  
PAFSPSALRRLEPTIEATVNDLLRPARALGAMDVVADLAYPLALRAVLEL  
LGLPAGDANAIGRSRAVGRTLDRGATAEDMRRGHAAIAEFTDYVERALA  
ERREDGADLLALMLAAHRSQ LMSRNEIVSTVVT FIFTGHETVASQLGNGL  
LSLLDHPEQLELVRRQPHLVPQAVEECLRFDP AVQSNTRQLAADVELHGR  
RLRRDDVVVVLAGAANRDPGRYDRPDELDIRRDVPVPSMSFGAGMRYCLGS  
YLARLQLRTALGAMVALPDLRLVCNPNELAYQPRTMFRGLTRLPVAFTPA  
G

>CYP105W2 (2518454248) *Salinispora arenicola* CNP193

MTGYQDRPTGDQPGAPVPSGSTDPGIGAFPLPRRCPFSPPAEYARLRAEH  
PVVRLPMLGGDTAWVVS RHADV RQVLS DPRMSADRRRP GF PKFAPTTEGQ  
RQASFANFRPPLNWLDPPEHAICRRQIVDEF SVRRVRQSRALVERVVDTH  
LDALTAAPGADLVSTFAYPVSSQVICEVLGVYPYGEHEFFERRSTLMFRR  
STPADERARCAREIRDFLDVVVTDKEHRPGDDL S RLLYRQRAGGVDHE  
AVVSMAFVLLVAGHVTTSNM LALSVLALLTHPARLARLRAE PERFPAAVE  
ELLRYFTVVEAATARTATAEVTIGGV TIAAGEGVVALGQAANRDP RVFEH  
PDEFDPDRDARAH LAFGHGRHICPGQH LARLEMEVALSRLFRRLPGLRLT

MEVSDLPLKEDSNIFGLYALPVAW

>CYP154M13 (2518454261) *Salinispora arenicola* CNP193

MSTGRPVVLDPTGRDIHGEADHLRALGPATLVLELPGGVLAWSINSYEVGK  
ALLSAPNVSKSARRHWPAFYNGEIPPDWEMISWVAMDNISTTFGGDHRRL  
RRLTAKAFGSRRAEQVRPMATHMVNTLLDRMADAADAGEVVDLKAFAFYP  
LPGMLVAELIGMSEEARVAAKVIDMMTATNITPEQAQGVLLGWRDAITD  
LIALKRAQPGDDITSDLIAARDEDGSLLTEQELVDTIFAILGAGSETTIN  
FFDNAITQLLTHPEQLELVKSGQVSWDDVIEEVLRLSPLASLPMRFAVE  
DIQLDGVTIHKGDPIILINYAALGRDPALHGESAGVFDVTRQHKEHLSFGH  
GAHYCLGAGIARMVAKTGLSALFERFPRMTLAVSAKDLVPYPTFIMNGNR  
QLPVHLSGALTWREGEQSALGRA

>CYP154M21 (2518454262) *Salinispora arenicola* CNP193

MEKCPYVLDRAGSDIHKEASNLRRARGPVTLVLELHGGYTASVTSYEVAEQ  
LLMDPRISKNTKAHWPEFRDGNVPQDWELYTWVAMDNMQTRDGKEHDLRL  
KLVAFAFTGRQAVKSRPIIEEIVNRLDDLETAPRGQAVDIKARYFYPLS  
TILVCDLLGIAEEDRDVILHGNVNVNSKTTNTAESEANLHQWQTALGRLV  
ETKRRDPGDDLTTVVIKAGEDEQTPLTDDEVIGSLHLLIGGGTETTANVL  
CHTVVDMLTHTPDQLAMVRSGAVSWESAWEEEVRKDGAVGSMPPFRCATDDV  
EIGGVITIAKGDVLVLINAAAAGRDPERYGDAAAEFDITRADKANLSFGYGR  
HRCGLPALATMEAMVALPALFDRFPNLALAVPPNELKPKQGTFFNGYAEV  
PLLLRS

>CYP208A12 (2518454426) *Salinispora arenicola* CNP193

MTLDTITPRVPLGPPTAALRMLLVMKRDRLGMLTSAAARYGDASRLPVG  
HKALWFFNHPRYAKHVLADNSANYHKGIGLVHARRALGDGLLTSEGD LWR  
KQRKVIQPAFQSRRIAQQAGMIAEEAFALVERLRARAGAGPVELTAEITG  
LTLGVLGRSLLDADLAGFDSIGDSFATVQDQAMFELETNLAVPMWIPLPR  
QIRFRARRRKLQAVVDTLVDGRAGNLADRVDVLSRLILSARGEADPRVGR  
ERLRDELVTLLLAGHETTASTLGWTLSLIDRHGPVWERLHAEAVEVLGDR  
LPEYDDLRLRLRYTVMVVEEAMRLFPPVWLLPRRALAPDTIGEYRVPANAD  
VVISPYTLHRHPEFWPNPERFDPERFAPGQAADRPRYAYLPFGAGPRFCV  
GNNLGMMEAVFVIALLCRHLRLTGVPGHRLVPEPMLSLRIRGGLPLVVRP  
VS

>CYP245A7 (2518455015) *Salinispora arenicola* CNP193

MPSATLPRFALTGWSRENIVNPYPVYQRYREVASVHRGEPGGDAPDTFYV  
FSYDEVVQVLSSNCFGRGRSLDAAKASVPVPAEQKALRAIVENWLVFMDP  
PRHTELRSLLNRSFSPRIVTELRPRIARIAQELLSRLSQQVDVDLVESFA  
APLPILVISELLGIPEERRAWLRANALALQEASSSRAGRDVDGYARAEVA  
AQEFTEYFREQVRLRRGRAGGDLITILANAQQRGAPVSLDAIVGTCVHLL  
TAGHETTTNSLAKAVLALREHPAVLDELGAEGLTTDAVEEFLRYDPPVQ  
AVTRWAHQDATLGGC DIPRGSRVVALLGSANRDPARFPSPDVLDVRRPAD  
RHLSFGLGIHYCLGATLARVELEIGLQALLDGVPPTLGYGTQHVDYADDLV  
FHGPSRLVLVNLGERC

>CYP244A4 (2518455019) *Salinispora arenicola* CNP193

MSTTTNTELTEAPETNMPVDPLFDCMPDLIAAARVAPVVRIPYLGRHAW  
VVCDELVKQALHTHPKMGKDIALVPEWMMRQPGLMVTAQPDPEYARAMIMS

DGENHARIRRIHAPVLSPRNTERWGERVADKVEGFLELSQAGSGGSTEV  
NVVTNYTHKIPLAFISEMLGLPPEAEHRLRGITDIMLYSSDYAARREAIG  
GLFGAVEDWVRNPADLRDGVITGLLAASDGPDAAVTEGEVIVWTLGMIIT  
GYETTGSLISTSLYEAIRRPPHERPKTDEDITAWIEETLRVHPPFPHTW  
RFPLEDIELGGYLIPKGAPVQVSIAAANRKPGEAGDSFDAERRGHGHLSE  
GLGMHYCIGAPLVRLEAQIAVRGFLRRFPQARLSAETAVQWESEWMIRRM  
SVLPAVLS

>CYP125A41 (2518455290) *Salinispora arenicola* CNP193

MTEPRIPAGFDFTDPEVLAHVRPREEFAELRRTAPVWVNAQPRGSAGFDD  
DGYWVVTRYADVMTVSRDSSTYSTRENTAIARLRPDTTREDIEMQRVIML  
NVDPPHEHTKLRAIVSRGFTPRAINALRGSLAERAHIVRDAAVRGVGDV  
TDVACELPLQAI AELIGVPQHRRKVFWDNSQLIGYDDPAYGTDPLTASA  
ELLYAMEMAEERQRSPSDDLVTCLVNAQIDGHELTDEFGFFVMLLAVA  
GNETTRNAITHGMVAFLDNPEQWELFKAERP KSAVEEII RWATPVNVFQR  
TALVDTVLGGQAI SAGQRVALFYGSANFDEAVFEDPERFDITRSPNPHLG  
FGGSGAHFCLGANLARLEIELIFNSIADHLPDIRKVAAPQRLRSGWINGI  
RQMPVRYR

>CYP107AX13 (2518455866) *Salinispora arenicola* CNP193

VTSPPHVAFGHLLRDPHGGYNALRGQAPVHHIRTPDGAPAWLVMRYDDV  
RAALTDPRLSVDKRFSDTDGEHGSSLPPELDAHLLNRDPPDHTRLRLRLAA  
AAFTPRRVADQAPAVATIVDALLDGIADQDQAEIIGALASPLPLQVMHEL  
LGLPTQTSVDFRNWTNTLLSADANQPAQSR SAMATMRFLMGQLARKRAQ  
PGDDLTLGLLAARDDDDRFTDDELLAMVFLLMFAGYDNTAALIGNVTHAL  
LTDAGLHDAVRAGSVLDLSDVDEVLRWNPSFPLAVRRFAREPVTIAGHTI  
PAGDRVWLCLASANRDPAQFTEPDELGITPARRPHLAFGHGIHYCLGAPL  
ARLQTTVAVASLLDRYPGIRLAVPAHEL RWRESFRVRGLAALPVRL

>CYP166A4 (2518456022) *Salinispora arenicola* CNP193

MTDAISFELPWARTDKFDPPTVFDALREQRPLARMRYPDGHVGWIVSSYE  
LVREVLGDPRFSHSCAVGHFPVTHQGQVIPTHPQIPGMFIHMDPPEHTRY  
RRLLTGEFTVRRSRLTGHEGVATEQIEVMREHGAPADLVATFARPLVL  
RVLSGLVLGPLYGERDRYLHAVTLLHDAEADPAEAAAAAYEQAGAYFDEVIE  
RRRRQPEDDLISTLVGDGELTGEELRNIVTLLLFAGYETTESALAVGMFA  
LLYHEDQLARLRADPTKIDAAIEELLRYLTVNQYHTYRTASEDIELHGEV  
INKGDSVTVSLPAANRDPARFACPAELDIERETS GHVAFGFGI HQCLGQN  
LARVELRAGLSALLRAFPNLRLAVPADEVPLRLQGSVFAVKNLPVCW

>CYP1051A1 (2518456150) *Salinispora arenicola* CNP193

MATDAAITRARTVPAWKALPAAVRDTHRALVDVGNWSDGDVVRVSLGVSR  
PYLVTNPAHVQEVLHERAAIYPRGDDTALWRSVRKLVGDGILAEGLAWAA  
SRRVLAPMFRPARINAMVDTMADAIAGAVDDLHGAATAGTPIDVGRELSR  
IVCSAIMRVFFADRITVRDALRIMKAQETIVTAMAPRILAPLVPWWIPMP  
GDRRFRAAVRSIDILLPVL RQAQRQPDDGDDL SRLVRARADDGQALSE  
KMRDDLVSMAVTTTETSTVVLTWLWPLL ANHPDVANRLYDEIDRVVGGG  
PVRGDHLAELTYTRMVLDELLRLYPAGWILPRRAATTDVLGGVRINKGAT  
VILSPYVTQRMTAWWGPTAEAFDPERFAAGREAADGRHRYAYYPFGVMH  
RCLGEHLFNLEAILIVATLLSRFRFALTDTSMPGVKVAASSTRPARTVEMI  
LKPVAPVPAR

>CYP105G5 (2518456170) *Salinispora arenicola* CNP193

LTIIETTETPPADDSLRAPLPRQFMQRDDPSKLPALAAALAEQSPVGRSTL  
PDGDPFWMVSGYDEARAVLSDPRFSSDRFRYHPRFKKLSGQLGERLRNDK  
ARAGSFINMDPPEHTRYRKLLTGQFTVRRMRQLTVRIEQIVTEQVDVMLA  
EGNSADLVSAFAVPVPSLMICELLGVRYEDRTEFQRRRAAGLLQTDLPKQ  
AVENLEAQRAFMQRLVTDKRRTPADDMISGLVHHAGAEPPLTDDELVGIA  
TLLLFAGLDTTASMLGLGMFMLLQRPEQMAVLRDDPSRIGDAVEELLRYL  
TVVSTGLFRFAKEDVVLGDEHIPAGSTVVVSLMAANRDGRHWPEPETLDV  
TRVRSSHLAFGHGVHQCLGQQLARIELTVGITELLRRLPNVRLAVPPADV  
PLRNDMITYGVHRLPILWDTP

>CYP107Q4 (2518456171) *Salinispora arenicola* CNP193

MTTTAETS AETIDLFSPEVVADPFGWYARLREETGPTTGTNLNIGTMMGGP  
EMWLVTTRYEDVRQVLTDPRFLTNPADSPLEDIRAGVFKRLDFPPDLIPW  
MANLLNVSDGEDHTRLRKLVSALT AHRIGKLRPRVEKITADLLDKLAED  
GKDGSPVDLVEEYCYPLPVTVICELVGIDEPDRPHWRAWGDSMATMNGER  
IPTTLVKCIELARELIAKRR AEPQDDLV TALVQAQ AEDQNRVSDDEIIGI  
LFSLV TAGHQTTTYLIGNSVILLLENPDQLARLKENPSMW PQAVRELQRL  
GPIQFAQPRFPSEDIELGGVTIPRGAPVAPLLLAANTDPRRFPDPNKLI I  
DRLAVGSEGLHGF GKGIHRCLGQH LAYQEA E VALQGLFTRFPDLSLAVPR  
EEIPWILRPGFTRTRTLP LKLV

>CYP105J3 (2518456892) *Salinispora arenicola* CNP193

MTDSVAFPQGRVCPHQPAPGYRPLAVQRPLAQVTLYDGRRVWAVTTRDLA  
RRLLVDPRISSDRTNPAWPAIVPIVAAAVNDAQQKVLKIATALVGTDGPE  
HKAQRKMLIPSF TFRMNALRPMIQEIVDQQ LDEM I KSGAPTDLIPAFAS  
AVPVTVLYRLMGIPDDDHGIF EKL SHQLLAGPNANEAYDQLMGYMSRLIA  
ERRRNPEGVLDLLAQHGANDDADHDELVSTLVVQVAGNHGTTGSMIAL  
GLFALLQHPEQLAELRADPSLMPTAVDELLRFLSV PDAVTRLAADDIEVE  
GTIIRKGDGVFFITSLINRDTDVHDAPNSLGWHHSAADHLTFGFGAHQC  
LGQSLARITMEIALGALIERLPSLRLAVPAEEVPFLPAASLQVIAELPIT  
W

>CYP105BL2 (2518457284) *Salinispora arenicola* CNP193

MSSHSAAAPDPETATPLHTLAPELAFFPQFERSAPFDPPQAYTELSGRCPV  
APVSMADGKPSWLITSFEGVRTT LSDPHFSSDM SHPGFPNRTGKPVDDL  
KDTL GAMDGERHRYRRLTGELTVRRAKAMRPVITQITDEALDQLAAAG  
PGADLVKHFVAFVVP SRVACHLVGIP L S DYELFTGMAATLMDSTSSDDQFA  
ALQNMVSYFDTLVTDREHHRDRLD LGHMVRRYLATGELTRDMLIRLAWTT  
MAAGQETT AHMIGLVAALLRHPDQLELLRREPHLLPGAVDELMRYLPLI  
QFGIPRVAMDDVEVDGQTVTAGEGVVALPPLANRDP AVFERPDELDVRRN  
ARQH LTFGYGPHQCPAHALARLELEV VYGRLLERFPTLR LADSDADLKVQ  
DKDIMYRVSELAVTW

>CYP211B2 (2518457440) *Salinispora arenicola* CNP193

MDVSEAI AVLISPSGR LDPYPTYEQ LRAHG PVSQTTAGLFVVTGYAEADM  
VLRDPRFVVLDDDLRDDVFPHWQDSPAIKSIARSMRLTNPPDHSRIRRLA  
AGAFTPRRVAAMREV VTAQADELVDEMIQAGRDGARVDFMDMFAYPLPVA  
VICALLGVPAADRSRFRRWAGDLTGILEPEITPEELAGADAGADELRDYF  
TGLIEQRRRAPADDLTALVQAHDADGDRLSGEELLANLVLLVAGFETT  
TNLLGNGLVLLTRPEAAAALRDEPDLAPGHVDELLRYDSPVQLTTRTVR  
ESVSFAGTELPA GSWLLVLLGAANRDP RRFPDPARFDPGRAQSQPLSFGA

GPHYCLGAGLARLEAQVAFPLLLRRLPELALAGRPSRRTRLTLRGYETLP  
ITVGAVTADRGTAGVAPGTP

>CYP211C1 (2518457849) *Salinispora arenicola* CNP193

VVDVEELLTRYSAQGRQDPFPVYADLHAQGPIAALPPEPERRRVAHAV  
GYDLVGAVLRDPEWSKAPPPGWTEQEILRTLQTSMMFINPPDHGRMRHVF  
AGTFTPRRLGALEPVVNRVADELDRMADAGAGGLDFVAEFAYPLPARVM  
AEFIGIPETELDWYRERVDVIDAFLDVAGKTPQRLAAANAAGAELEAFY  
ELLARRRRTPGEDLISGLVEAVDAGGVELTEDELVSNLIVLFNASFVTTV  
YMLSNGLPVLLAHPEVAAAALATDPVLTAGAVDEILRLQAPVHLLARAAPR  
DTVLGGVPI PQGQNVLLLLIAAANRDPAHFPDPDRFDPWRS GPPSLAFGLG  
LHYCLGAAVSRLEGRALPRLLSRFPRLRIMEQPVYSGSLFLRGIDKLSV  
SPGEGSTRE

>CYP107AY2 (2518457922) *Salinispora arenicola* CNP193

MTAEPTPIPRSGARLGQEYDQLRKTGDVHQVLLPDTSLAWLVTNPEVAAR  
ALADPRLALNRRNSRGGWSGFALPPALDANLLNLDPDHTLRLRLVGPAP  
SPQ RVAALRPGIRRAAEHLLDTLVATSGPTDLVTGYCNPLSVQVIADLMG  
VPEAGRTNLRAWTDMLTSYPPDRDAIRQAVTELHGYYVDLIDIKQQQPG  
DDL LSALVTIEQDGDRLSRDELTSLAFLILFAGYENTANLIASAVLWLLD  
HGGLNVVPSSEAEIEGTLRHEPPAPVAIRRFPTEDIIIGGV TIPAGDTVLL  
SIAAATRGADGNAARLAFGNPPLLPRCGPGPGRGRGGTHRAGPSATRS  
ARRAPFPGPVASDVSHPRPRRTPGRLVAVRDDR MAGHYLGNGQREVADA  
R

>CYP163B16 (2518457980) *Salinispora arenicola* CNP193

VTAADPGRVSGESQTPAHTVDLADPATFANRDLTGFWQQLRDEEPIHWN  
PPTSGRRGFVVVSRYADILDVYRDDVTFTSERGNVLVTLLAGGDAGAGRM  
LAVTDGPRHAELRKLLLRALGPRVLAPVCAAVRANTRQMVREAVTKGEC  
FASDIASRIPMMTISNLLGVPDADRAFLSLTKTALSADDES ISETESAM  
ARNEILLYFQDLMEFRRDHPGEDVVSMLVNSTIDGAPLSDDDIVLNCYSL  
IIIGGETSRLTMIDSVNTLAAHPKQWRRLKDGQCEIDKAVDEVLRWASPS  
MHFGRVAAKDTILRGVQIRADDIVTLWHASGNRDERVFHRPEVFDLGRTP  
NRHLSFGHGPHYCIGSYLAKVEISELLIALRDLTSGFETTGE PQRIRSNL  
LTGFSTMPVRFPVDRAGLARDALDG

>CYP162P1 (2518458360) *Salinispora arenicola* CNP193

MGLPSEVDLAEPDLADPDLYAEGDPDAEWAWLRAHRPVYRNPAGATAEFW  
ALTRYRDALQVYRDPSTFSSERGMVLGVDPVAGDPAAGRMLVVTDP PRHP  
KLRRIVSGIFVPRTMHRLEGRVRS LVDQLLHRVVDGAGRCDFANDVAARL  
PVAIIICELLGVPADEQDWMYHLTSTAFGGGDPAGSAEVS AVERAEAYGDI  
LLYYGELAAERRRRPGDDLVTLLVHADLDGEPLDVEDVLVNCTNLIIGGN  
ETTRHAASGGLLALAQRP ELWRRLRETPTAVPTAVEEVLRWTT PGMHVLR  
TATRDTEIGGVPIRAGERVVVWNAANRDEDFADPQRFDIDRSPNRHIA  
FGQGGHHCLGAALARLELTILFEEMAKQVTNVRLTG PVRVRVRS CVLRGIR  
ALPVELVT

>CYP1005A1 (2518458384) *Salinispora arenicola* CNP193

VSAVLFRSWTKTAGTRWPDVTRVADQSGTEHLVVTRHALVRQVLT DQATY  
RPDNAL EAVTPVPVAAALRVLAGHRFRLPPTLANNGGVSHPAIRALVADAL  
HPTKVAAQR PWTGLVADRVATIRTTLD SGGPVDLYADLTADL PLLVLAR

LVELPDAPVNAVVKQFARAALFVWAPLDADRQLALADEVGRFHQVLRFA  
DTGGGLAAALRATGHSPDVLVGLFLLVAGQETTSQFLTLHRLSGEP  
TIRAALRAGSISVADVVEEGLRLEPPIVWRRVAVDSTLGGTTVAAGTS  
VLLWLARAGRDPVVAAPDEFPRPGQRGSRRHLAFGAGAHRCGLGDQLARME  
AAVVVEQATPLLDGVTVVRPPWYPDNLTFRMPDAFVVR

>CYP211B11 (2515718889) *Salinispora pacifica* CNS103

MDASEAVALLTSPGRLDPYPTIERLRAHGPPVSTAAGFFVVTGYTEADT  
VLRNPRFEVMDDEERDGVFPHWQDSPAMISISRSMIRANPPDHSMRRLA  
AGVFTPRRVAALREVVAQADGLVDEMIRAGRGAAVDFMGSFAYPLPVT  
VICALLGVPTADWARFRHWASDLTGVLPEITPQELAIADAGASELRDYF  
TELIAQRRRAPADDLTALVQAHDADGDRLSGEELLANLVLLLVAGFETT  
TNLLGNGLVLLTHPDSATALRGQPELAPGYVEEFLRYDSPVQLTSRTVR  
ESVSLAGVELPAGSWLLVLLGAANRDPARFTDPARFDPRAQSPPLSFGA  
GAHYCLGAGLARLEAQVAFPLLRRLPELALAGEPTRRHRLTLRGYETLP  
VTVGAVPADPGTPAGVALGTP

>CYP107AW7 (2515719471) *Salinispora pacifica* CNS103

VETVTGTSTPPVPYIADPYPTLARIRANGPVSILHSDEGIPMWVIARYR  
DVRAALADPRFGQDARRAQALADNRVAGVTLGGDIVHMLNSDPPDHTRLR  
RHHVQGAFTARRVAAMRPLVERITTSLLDGLTGRTTVDLVQDFAFPLPLV  
ICELLGFPAEERNAYRSWSTAILTHDDDPAAFATALREMTDYIAVQLRIR  
QTRPGDDILTELLAARDAGQLTDEIIGMVFLLLIGGHETTVNLLGTATL  
ALMRNPDQHRWLLANQHALPEAIDEFLRYESPAMATLRFTTTPVAVDDV  
VIPAGELVLVSLGGANRDPDRFPDADRLILDRRDTGHLAFGHGLHRCLGA  
FLGKLEGEVALGALLRRHPRLALAAEVRQLRWRDTIMLRGLESPLVSLHG

>CYP125A65 (2515719632) *Salinispora pacifica* CNS103

MTEPRIIPVGFDFTDPAVLERRVPREEFAELRRTAPVWWNVQPRGSAGFDD  
DGYWVVTRYADVMASRDSEYSTRENTAIARFQPGTTQADREMQRVIMI  
NVDPPPEHTKLRAIVSRGFTPRAINALRGSLAERAERIVRDAAVRGTGDFV  
TDVACELPLQAIAGELIGVPQHHRKVFWDNSQLIGYDDPAYGVDPMAAAA  
ELLAYAMEMANERQRNPSDDLVTKLVAQIDGEHLTTDEFGGFFVMLLAVA  
GNETTRNAITHGMLAFLEHPDQWELFKAERPRSAVEEIIRWATPVNVFQR  
TALVDTTLGGQAITAGQRVALFYGSANFDESVEEPERFDITRSPNPHLG  
FGSGGVHFCGLGANLARLEIELIFNSIADHMPDIRKVADPQRLRSGWINGI  
REMPVRYR

>CYP208A22 (2515719724) *Salinispora pacifica* CNS103

MTVIADRGGRIPPGPPVTAGLRLLALGRDRLGMMTSAAAEGDVARLPV  
GPKKLYFFNHPDHAKHVLADNHANYQKGIGLVHARRALGDGLLTSEGELW  
RKQRRVIQPAFQNRRLAQYAGAVGQEATRLVARLATRVDPVPVLDLDMT  
RLTLGVLGRTLDAELTGFGVGVGESFAAVQDQAMFELETNTVPTWIPLR  
RQRRFRRARQHLQEVVDVLAERGQAVEGRDDVLSRLILSTRAEADPQLG  
RERLRDELVTLLLAGHETTASTLGWSLHLLDQHPERLRRVRHEARTVLGD  
RVPAYEDLHQLRYTAMVVEEAIRLYPPVWILTRKARAEDEIGGYRVPAGA  
DILICPYTLHRHPRFWAEPERFDPERFDPSRITDRPRYAYIPFGAGPRFC  
VGNNLGMLEATLVLAVLLRDLRLGLELPGRAVVPEPMLSLRVRGGLPMTVR  
RVD

>CYP124M3 (2515719745) *Salinispora pacifica* CNS103



MTVPIELDAVDLSDNDFWTKPLEYRHAVFNALRAQPGLPHFASPEFGSAP  
RGRGYYALTRMDDVLAVSRNPSVFI SGKGNVAMEVPAEF LDQSLITMDNP  
RHARLRRI VSRGFTMKAVTALMDNASQMAKQIVDEVVERGECDAVVDISA  
KLPLGI ICNMMGIPDSQQQFVFEQTNVMLGVQDPEYVGEQNDAMLAMSV  
SQELADLMHELATLRKNPTDDLI SKLLSAEVNGEALTPSEL AHFFILLT  
GAGTETTRNAISWGIQLLTQSPEQREAWLS DIDGVTPTAVEEIVRWSSPV  
ISQRR TVAEDAEPVKLAGQLLGP GDKVLMFYGAANRDPNYFVHPEGFDVR  
RSPNPHVGYGGPGPHFCLGAHLARLEISVMFRELLTRIPDIHATGEPARL  
KSPLINGIKRLPVAFTPGAR

>CYP105AB28 (2515719771) *Salinispora pacifica* CNS103

MTETASTTTPGISSTTTSGPASGEVTD AEFPLERGC PFSTPTEYEQIREH  
SPLAKVRLTTGREAWWIAGHELGRAVLADRRFSSDRRRDNFPFVSTD PET  
RKQLQDQPTSMIGMDGA EHAQARRALMG EFTVRRMAGLRPRIQQIVDQHI  
DEMLSSDQRTADLVEALS LVPVSLVICELLGV PYADHDFQARSGLIRH  
TTPTEVRLRIQKELNTYLGALIDRKVADPTDDLLSRQIAKHHAAGTFDRT  
SLVSM AFLLLIAGHETTANMISLG VVGLLQHDPQLAMIKEDPEKTPPAVE  
ELLRYFTIADTVTARVATEDVQLGGTTINAGDGVVISGLAADHDPTVFTD  
PDRLDLERGARHHVAFGF GPHQCIGQTLARMELQIVFDTLFRRIPTLRLA  
APLDDIPFKSDAFVYGAERLPVAW

>CYP107FH3 (2515721683) *Salinispora pacifica* CNS103

VPIELDEAFVQDPYAVYEKLRAEGPAHRVRMP PGVPLIGGLPVWLITGYD  
AVRAALADSR LSTDLHRIDGLFAQKDPDRSHRGGFSSALASHMMHTDPPD  
HTRLRKLVS KAFTTRAIEALRPRIQQTDELTAELAGHDTV DLLDAFAFP  
LPIRVICLLLGVPVAEQENFRSWSRALVSGHSPEAAAATAATEVAAYLGDL  
VERKRHATTD DVLTA LVAHDVDDRLTHTELVSTAYLLFIAGFETTLNAL  
GNGTLHLM LHRDQWTALRADRALLDNAVEEFLRLESPLKHATFRCATESL  
RIGDAEIAAGDFVLLA IASANRDPRRFPDPHTLDVRRPAAGHLAFGHGIH  
HCLGAPLARVEVRMAFDALLDAFPDMRLATDPAGLRWRNSTIIRGLDSL P  
VHLNN

>CYP2054A3 (2515721688) *Salinispora pacifica* CNS103

MSISADSEQVQGRFPDPYGAHRDDPYTFLAGLG VFYAPLLDAWCVTRRED  
MVAVLRDDRSFSARDHNPRPAVALPDDVNQMFR TWRGAGAVAVGSLDPPA  
HAKIRDVLNIGFTPARVRAFEPTMRAVAADLADRIGDAPEFDFIADFAVP  
FALEVIGRRLGV PDDYLDR CRTWSEQRIELMMAQGDADHDRLREFARGLM  
EFGEFARS LVRDRVADPRDDLISELLHDGKAGRTLTADEVAVQIPTLIFA  
GHMTCAEALGTIFYQQLRSPGGWARVVDRTIPV GDLVEEGLRFDSPLAGM  
YRTATRDVTVGGIRLTAGSRLLLLYGAAGRDSRAHACPAAFRPGDGSSGH  
LAFGHGIHFCLGAGFARAELRVAVEVLAARMPDLGLAPGRPPRF RVPFPL  
RALTEL RVTRSGGGSGP

>CYP161N4 (2515721693) *Salinispora pacifica* CNS103

VNTVAQLPFTQTHVLDVAPALRLLQSRGKVHRVRTPEGVPAWLVTGHAEV  
QQLLDDDRLSRSDPGGRDGGTALLNKLLG PLADHDHPRLSLLEPQFTPER  
LEPLRAVVEKLTEQHLDELATRTPPVDLRPALAMSLPIILVLC EWLGVPAE  
DKGRFSVWTQDAAGVQDPERSQRGLAELFGYCRQLVAAKRQDPGDDVISR  
LIATAGIGDTEVVALTALLLFGGYETTVARIGTG VLLLLTNPDQWAAVRA  
DPALVPATVDELLRRSMPNPHNGGMPRFAVTGFEIDGAAIRAGDLVLLNI  
IAANHDETAFFDPDRLDITRPTAGSLAFGYGRHSCVGAPLARMVLRVALS  
RLITRFPDLRLAVGVDELKLRHETLVGGLVELPV TWGPR

>CYP107AY9 (2515721764) *Salinispora pacifica* CNS103

MSQDQPTRAELAPIPRSGARIGPEYDQLRKTDGDVHQVLLPDTSMWLVTSPDLVSRALADPRLALNRKHSRGGWSGFALPPALDANLLNLDAPDHTRLRRLVGPAFSPQORVAALRPRIQRTAEELAETMVATGSPVDLVTGYCTPLSVQVIADLLGVPDAGRTDLRAWTDMLTSYPPDRDAIRQAVVELHGYVNLIEAKQQRPGDDLSSALVATEQEGDRLTRDELTSLAFLILFAGYENTANLIAS TVLRLLDHGSLRGVRASEAIEETLRLEPPAPAAIRRFPTTEMTIGGATIPAGDTVLLSIAAATRGADVNPARLAFGNPHYCLGAALARVEAEEAITVLARRLPGLALAVPGAPVRWRPTFRTHGPAELLVAW

>CYP1005A6 (2515722044) *Salinispora pacifica* CNS103

VSAVLFRSWTKTAGTHWPAVTRVADQQGTEHLVVTEHALVRQVLTQVTRYRPDNALDAVTPIFVAALRVLAGHRFRLPPTLANNGGVSHPAIRALVADALHPAKVAAQRPWLTELVAERVAAIRATLDSGGSADLHAELSADLPLLVLARLVELPDAPVSAVKQFARAALFELFWAPLDADRQLALADEVGRFHQVLRFA DTGGGLAAALRATGHPPDVLVGALFFLLVAGQETTSQFLTLLHRLAGEPTVRAALRDGSVSVPNVVEEGLRLEPPIVTWRRVAAVDSTLGGTAVPAGTSVLLWLARAGRDPPIVSAPDEFPRPGQRGSRRLAFAGAHRCCLGDQLARMEA AAVVVERVSPLLDGVTVVRAPWYPDNLTFRMPDAFVIRRGPAAGAAER

>CYP107E37 (2515723071) *Salinispora pacifica* CNS103

VTIDQEIREYPPFRESRGIGIDPTYELLRRTEPLARVQLPYGEVSWLVTRYEDVKTVLTDPFRFSRAAAQGKDQPRTRAEMTYEGIIGLDPPDHTRLRRLAGKALTARRVNAIRADAQRIANEYVDEMIAKGSPGDLVELFALPYPVTVICE LLGVPFEDRAQFQIWTGELTSTSEQLMVYAEQLFDYMGKLVAQRRAEPTD DLLGALVKARDEGDRLTEQELLSIAGVGLLLTG VETVSTHIPNFVYALLTHPELMAQLRADRS LVPAAVEELLRMIPLNPAAMFPRYAVDDVTLSGITVRAGQPVLVSLPGANRDPEVFENPETFDFTREQNPHVAFGHGPHHCLGAQLAR MELQVALHTVLD RFPDLRLADGDEGVSWKSGLLVRGPSRLLVGV

>CYP107AX4 (2515723208) *Salinispora pacifica* CNS103

MTSQPAPVFDQLLL RDPHRRYNALRDEAPVHHIRTPDGAPAWLVTRYDDVRAAFTDPRLSVDKRLSSTDGEHGSSLPPELDAHLLNRDPPDHTRLRRLAA AAFTPRRVADLRPAVERIVSTLLDGLVGHDAQELIGSLASPLPLQVMQEL LGLPTQTSVDFFRRWTNTLLSADANQPAQSRSAMANMRRFLVEQLAHKRAR PGDDL TGLLAAREDDRLTDDELVAMLFLLMFAGYDNTAALIGNVVHAL LTNTELPAAVRTGSLALDELVDGVLRWNP SFPLAVRRFAREPITIAGQTI PAGDRIWLCLASANRDPAQFTAPDTLGT TGMRRPHLSFGHGIHYCLGAPL ARLQTTVAVTILLDRFPGIRMAVPAHDIRWRESFRLRGLVALPVFL

>CYP208A12 (2518448907) *Salinispora arenicola* CNP105

MTLDTITPRVPLGPRTAALRMLLV MKRDRLGMLTSAAARYGDASRLPVG HKALWFFNHPRYAKHVLADNSANYHKGIGLVHARRALGDGLLTSEGDLWR KQRKVIQPAFQSRRIAQQAGMIAEEAFALVERLRARAGAGPVELTAE LTGVLGRSLLDADLAGFDSIGDSFATVQDQAMFELET LNAVPMWIPLPR QIRFRARRRKLQAVVDTLVDGRAGNLADRVDVLSRLILSARGEADPRVGR ERLRDELVTLLLAGHETTASTLGWTL SLIDRHPGVWERLHAEAVEVLGDR LPEYDDLRLRLRYTVMVVEEAMRLFPPVWLLPRRALAPDTIGEYRVPANAD VVISPYTLHRHPEFWPNPERFDPERFAPGQAADRPRIAYLPFGAGPRFCV

GNNLGMMEAVFVIALLCRHLRLTGVPGHRLVPEPMLSLRIRGGGLPLVVRP  
VS

>CYP105BL2 (2518449049) *Salinispora arenicola* CNP105

MSSHSAAAPDPETATPLHTLAPELAFFPQFERSAPFDPPQAYTELSGRCPV  
APVSMADGKPSWLITSFEGVRTTSLDPHFSSDMSHPGFNRTGKPVDDL  
KDTLGAMDGERHRYRRLTGELTVRRAKAMRPVITQITDEALDQLAAAG  
PGADLVKHAVFVVPVSRVACHLVGIPLSDYELFTGMAATLMDSTSSDDQFA  
ALQNMVSYFDTLVTDREHHRDDLLGHMVRRYLATGELTRDMLIRLAWTT  
MAAGQETTAHMIGLVAAALLRHPDQLELLRREPHLLPGAVDELMRYLPLI  
QFGIPRVAMDDVEVDGQTVTAGEGVVALPPLANRDPVAFERPDDELVRRN  
ARQHLTFGYGPHQCPAHALARLELEVYGRLLERFPTLRLADSDADLKVQ  
DKDIMYRVSELAVTW

>CYP211B2 (2518449480) *Salinispora arenicola* CNP105

MDVSEAI AVLISPSGRLDPYPTYEQ LRAHG PVSQTTAGLFVVVTGYAEADM  
VLRDPRFVVLDDDLRDDVFPHWQDSPAIXIARSMLRTNPPDHSRIRRLA  
AGAFTPRRVAAMREVVTQADELVDemiQAGRDGARVDFMDMFAYPLPVA  
VICALLGVPAADRSRFRRWAGDLTGILEPEITPEELAGADAGADELRDYF  
TGLIEQRRRAPADDLTALVQAHDADGDRLSGEELLANLVLLVAGFETT  
TNLLGNGLVLLTRPEAAAAALRDEPD LAPGYVDELLRYDSPVQLTTRTVR  
ESVSFAGTELPAGSWLLVLLGAANRDP RRFDPARFDPGRAQSQPLSFGA  
GPHYCLGAGLARLEAQVAFPLLLRRLPELALAGRPSRRTRTLRGYETLP  
ITVGAVTADRGTPAGVAPGTP

>CYP125A41 (2518449849) *Salinispora arenicola* CNP105

MTEPRIPAGFDFTDPEVLAHRVPREEFAELRR TAPVWWNAQPRGSAGFDD  
DGYWVVTRYADVMTVSRSDTYSTRENTAIARLRPDTTREDIEMQRVIML  
NVDPP EHTKLRAIVSRGFTPRAINALRGSLAERA EHIVRDAAVRGVGD FV  
TDVACELPLQAI AELIGVPQHRRKVF DWSNQLIGYDDPAYGTDPLTASA  
ELLAYAMEMA EERQ RSPSDDLVT KL VNAQIDG EHLTTDEF GFFVMLLAVA  
GNETTRNAITHGMVAF LDNPEQWELFKAERP KSAVEEII RWATPVNVFQR  
TALVDTVLGGQAI SAGQRVALFYGSANFDEAVFEDPERFDITRSPNPHLG  
FGGSGAHFCLGANLARLEIELIFNSIADHLPDIRKVAAPQRLRSGWINGI  
RQMPVRYR

>CYP105J3 (2518449999) *Salinispora arenicola* CNP105

MTDSVAFPPQGRVCPHQ PAPGYRPLAVQRPLAQVTLYDGRRVWAVTTRDLA  
RRLLVDPRISSDR TNPAWPAIVPIVAAA VND AQQKVLKIATALVGT DGPE  
HKAQRKMLIPSF TFRMNALRPMIQEIVDQQLD EMIKSGAPTDLIPAFAS  
AVPVTVLYRLMGIPDDDHGIF EKLSHQ LLAGPNANEAYDQLMGYMSRLIA  
ERRRNPGEGVLDDLLAQHGANDDADHDELVSTLVVQVAGNHGTTGSMIAL  
GLFALLQHPEQLAELRADPSLMPTAVDELLRFLSV PDAVTRLAADDIEVE  
GTIIRKGDGVFFITSLINRDTDVHDAPNSLGWHHSAADHLTFGFGAHQC  
LGQSLARITMEIALGALIERLPSRLAVPAEEVPFLPAASLQVIAELPIT  
W

>CYP244A4 (2518450156) *Salinispora arenicola* CNP105

MSTTTNTELTEAPETNMPVD PGLFDCMPDLIAAARVAPVVRIPYLGRHAW  
VVCDELVKQAL THPKMGKDIALVPEWMRQPGLMVTAQPDPEYARAMIMS  
DGENHARIRRIHAPVLS PRNTERWGERVADKVEGF LDELSQAGSGGSTEV  
NVVTNYTHKIPLAFISEMLGLPPEAEHRLRGITDIMLYSSDYAARREAIG

GLFGAVEDWVRNPADLRDGVITGLLAASDGPDAAVTEGEVIVWTLGMIIT  
GYETTGSLISTSLYEAIRPPHERPKTDEDITAWIEETLRVHPPFPHTW  
RFPLEDIELGGYLIPKGAPVQVSIAAANRKPGEAGDSFDAERRGHGHLSE  
GLGMHYCIGAPLVRLEAQIAVRGFLRRFPQARLSAETAVQWESEWMIRRM  
SVLPAVLS

>CYP245A7 (2518450160) *Salinispora arenicola* CNP105

MPSATLPRFALTGWSRENIVNPYPVYQRYREVASVHRGEPGGDAPDTFYV  
FSYDEVVQVLSSNCFGRGRSLDAAKASVPVPAEQKALRAIVENWLVMFMDP  
PRHTELRSLNRSFSRIVTELPRPRIARIAQELLSRLSQQVDVDLVESFA  
APLPILVISELLGIPEERRAWLRANALALQEASSSRAGRDVDGYARAEVA  
AQEFTEYFREQVRLRRGRAGGDLITILANAQQRGAPVSLDAIVGTCVHLL  
TAGHETTTNSLAKAVLALREHPAVLDELRGAEGLTTDAVEEFLRYDPPVQ  
AVTRWAHQDATLGGCDIPRGSRVVALLGSANRDPARFSPDVLDVRRPAD  
RHLSFGLGIHYCLGATLARVELEIGLQALLDGVPTLGYGTQHVDYADDLV  
FHGPSRLVLVNLGERCK

>CYP1005A1 (2518450312) *Salinispora arenicola* CNP105

VSAVLFRSWTKTAGTRWPDVTRVADQSGTEHLVVTRHALVRQVLTQATY  
RPDNALAEAVTPVPVAALRVLAGHRFRLPPTLANNGGVSHPAIRALVADAL  
HPTKVAAQRPWLTGLVADRVATIRTTLDSSGGPVDLYADLTADLPLLVLAR  
LVELPDAPVNAVKKQFARAALFELFWAPLDADRQLALADEVGRFHQVLRFA  
DTGGGLAAALRATGHSPDVLVGALFFLLVAGQETTSQFLTLHRLSGEP  
TIRAALRAGSISVADVVEEGLRLEPPIVWRRVAAVDSTLGGTTVAAGTS  
VLLWLRAGRDPVAVAAPDEFPRPGQGRSRRHLAFGAGAHRCCLGDQLARME  
AAVVVEQATPLLDGVTVVRRPPWYPDNLTFRMPDAFVVRR

>CYP105CP2 (2518450548) *Salinispora arenicola* CNP105

MTKSMPVQDLPAFFIPRECPYRPSAQHVSLRSGGPMKVRLYNGRTAWLV  
TDSAHAARAVLSDYRRVSIKPYHGNYPILLNEEFKVVDSGYADVLFVGDPP  
EHTRQRMIMPSFTLRRTAVLRPDIQRIVDDKLDMMMRHGAPGDLVTEFA  
QPVPSPMVISFLLGVPWEDHEEFETPAHKLFVPELAEAEATTELGAYLERLI  
QKKEQPGGTPGGTGLLDDLIRDHLRAGALSDELVHIAMAMLVAGTDTT  
NVISLGLTALLDNPQWAAALRDNPDDELIPGAVEEILRYTSLIEAFARVAV  
SDIELNGAVIKEGEGILISSAGVNFDPALAPDPGRFDIRRPPRPSFSFSH  
GIHRCPGDNLARLELEIAFRSLVTRMPNLRATAKPIDQIPSNNDGTLQRL  
YELPVVW

>CYP105CN1 (2518450550) *Salinispora arenicola* CNP105

MAAPAPQATTSTTPHPPSYPLPRECPYRPSAGTAHLRDAGPVSTVRLYDG  
RTAWLVGTGAEEARALLADSRVSNRADFPNYPVMDEHLSMRATREMAREE  
EGGFAAALFGMDPPEHTRQRLQLLPRFTVRQVAARRPAIQRMVDEHLDAM  
EANGSPADLVSAFATPVPTMVVCTHLGVYPYQDRTRFEPVAVAGLFEPDRAD  
AAMAELTAYLHQLIETKQSEPGDGVIDHLIANHLRPGAIDRAELVAIASA  
ILVAGTVTTSSAIALGTLALLTAPGQYTALVDNPDLPVAVNEILRYLSL  
VEQLARVATEDIEIGGKLIRAGDGIIVSFAAGNLDPNVTTHPDRLDVALP  
PTNHAFSHGIIHCIGQNLALLELDIAFRALVSRFPTLRLAVPAEQQLPTY  
FAGDVPRCLACLPVTW

>CYP107FS2 (2518450551) *Salinispora arenicola* CNP105

MPVPQGEQNLTTTEVFADPKALIATLGSRQPLHRISLPDGMFAVLVTGNRE  
ARQALSDPRLVRSITAAAPELHKYHPLASDDYALSRHMLFADPPDHGRMR

KLVSTAFTRRRVEQMRPRIQQITDDLIDVIAAKGEADLVETLALPLPIAV  
ISEMLGVPPFADRSEFERHAEVLTGINASSGFDALIAAGRWFDEYLAGLVQ  
QRRREPQDDLISGMLAAQDKGDRLTDVELRSNALLLSAGFETTVNLIAN  
GLLALLRHPEAMAAALRSEPNLMTTAVDELLRYDSPVSCVTYHFAQEPEI  
GGFEIRSGEHVVIAAAAAANHDP TVFADPSRLDLRREGSGQILSFSGIHF  
CLGAPLARLEGEIAFGTVLRRLAGRLAVPTDSLWVKASFVLHRLERLPV  
TFTPDRDPNPIDSVHTV

>CYP125G6 (2518450591) *Salinispora arenicola* CNP105

VPTLLNEHVSYDGAIAIVDS DGATSWIRLAERVNRWVHLLRAHGLDTGD  
RLACVTGNRRETFFVLLAALHTGVTVPVNWHLTVTEIGHILSDSGSRVV  
ITEELHVKAVAAAADGMAGPVAGLVLG DREIEGFAAVEPLLAASPAEPE  
GQVCGATMLYTS GTTGRPKG VVNNLFVTGAPYARVGRLCDYARSVLG VPR  
RERMLLDGPWYHSSQLFFALLSLLQGSRLVIRPYFDPAATLKTIDDHRIT  
VTHLVPTQLVRLLRVDALTRQMFSGASLRRVWHGGGCPPEVKRSMIDWW  
GPVLVEYYGATEGGVVTLIDSAEWLARPGSVGRAVPPSEVVVVDDGGQP  
AAGQTGQVFFRRRTGNRFHYHNAPEKTQAAYLAPDTFTTYGEVGHVDE  
GYLFLTGRAQDMIVSGGVNVYPAEVEAALLRHPVVRDAAVIGVADDEF  
GERVVGIVVPETAVDPDDLATHLDAHCRVSLAGFKVPRTYRVVESLPR  
DETGKL RKDALRSKFGWLSGAAMTVPRPATGQPTAHRPDIAHPTTYV  
SGVPHDEFA RRRRDEPVGWAE PVLTRHTAAGRTATRGSGFWAVTRY  
EDVVAASRRVTD FSSAAKGAF LTPRTPADLQQA RQLLVNMDDPH  
HARLRKLVT SVFTPRAV RGLLASIDAHAAALVAKVVAAGEFDV  
VTDLAAELPLLVLADLLGV PKQDR ALLYGWSNHLVGFD DPDFG  
GGDIDAYRTAMAEAFQYALNLGVERRARPTD DLVSLLANAEVDG  
TRLTDREFCNFWLLLVVAGNETTRHLVAGTMQALTEH PGECARL  
VEGRVPTESAVEELLRWVTPIMQFRRTATRDTEIGGQAVTAGE  
KVVLYYTSANRDATVFAEPDRDLGRTPNRQLSFGIGPHYCLGAHL  
ARAE LTALLRVMSPHLGS LQLTG PVSRLASN FVNGVKAMPAVIGSR

>CYP154M15 (2518450616) *Salinispora arenicola* CNP105

MNDKCPFAALDVTGQDLHG EAARLREQGPAVLVELPGGVKAWSINRYEVI  
RELLMDRRVTKNARKHWP AFIKGEIPPDWEMISWVAMDNMVTAYGKD  
HVR LRKLVGRAFTQRRADALRPQVVALSTKLDDLGATPPGEVVDLRE  
RFAYP LPAMLVASLIGMSEAAALACSKVIDMMVHTNVSP EEAQAVL  
RGWRAAMAD LIESKRRTPGEDITTDLIAAREEDGSRLSEAEADTI  
FAILGAGSETTIN FFDNAITALLSRPGQLQLLRTGAVTWDDVIDE  
VLRVESPLAHLPLRYAVE DIELDGV T I PQGDPILVNYAAAGRDP  
ALHGGTADEFDLARGDKTHLSFGY GPHYCLGAGIARMVATIGLSM  
L FERFPDLSLAVPATELKR LPTFIMNGHQ TLPVRLTAHAR

>CYP107Q4 (2518450828) *Salinispora arenicola* CNP105

MTTTAETS AETIDLFSP EVVADPFGWYARLREETGPTTGTLNIGTMMGGP  
EMWLVTTRYEDVRQVLTDP RFLTNPPADSPLEDIRAGVFKRLDFPPDLIPW  
MANLLNVSDGEDHTRLRKLVS YALTAHRIGKLRPRVEKITADLLDKLAED  
GKDGSPVDLVEEYCYPLPVTVICELVGIDEPDRPHWRAWGDSMATMNGER  
IPTTLVKCIELARELIAKRAEPQDDLVTALVQAQAEQDNRVSDDEIIGI  
LFSLVTAGHQTTTYLIGNSVILLLENPDQLARLKENPSMWPQAVRELQRL  
GPIQFAQPRFPSEDIELGGVTIPRGAPVAPLLLAANTDPRRFPDPNKLI  
IDRLAVGSEGLHGF GKGIHRCLGQH LAYQEA E VALQGLFTRFPDLSLAVPR  
EEIPWILRPGFTRTRTLP LKLV

>CYP105G5 (2518450829) *Salinispora arenicola* CNP105

LTIIETTETPPADDSLRAPLPRQFMQRDDPSKLPALAAALAEQSPVGRSTL

PDGDPFWMVSGYDEARAVLSDFRFSDDRFYHPRFKKLSGQLGERLRNDK  
ARAGSFINMDPPEHTRYRKLLTGQFTVRRMRQLTVRIEQIVTEQVDVMLA  
EGNSADLVSAFAVPVPSLMICELLGVRYEDRTEFQRRAGLLQTDLPKQ  
AVENLEAQRAFMQRLVTDKRRTPADDMISGLVHHAGAEPLTDDDELVGIA  
TLLLFAGLDDTASMLGLGMFMLLQRPEQMAVLRDDPSRIGDAVEELLRYL  
TVVSTGLFRFAKEDVVLGDEHIPAGSTVVVSLMAANRDGRHWPEPETLDV  
TRVRSSHLAFGHGVHQCLGQQLARIELTVGITELLRRLPNVRLAVPPADV  
PLRNDMITYGVHRLPILWDTF

>CYP1051A1 (2518450849) *Salinispora arenicola* CNP105

MATDAAITRARTVPAWKALPAAVRDTHRALVDVGNWSDGDVVRVSLGVSR  
PYLVTNPAHVQEVLHERAAIYPRGDDTALWRSVRKLVGDGILAEGDAAWAA  
SRRVLAPMFRPARINAMVDTMADAIAGAVDDLHGAATAGTPIDVGRELSR  
IVCSAIMRVFFADRITVRDALRIMKAQETIVTAMAPRILAPLVPWWIPMP  
GDRRFRAAVRSIDDILLPVLQRQAQRQPDDGDDLLSRLVRARADDGQALSE  
KRMRDDLVSMVAVTTETSTVVLTWLWPLLANHPDVANRLYDEIDRVVGGG  
PVRGDHLAELTYTRMVLDELLRLYPAGWILPRAATTDVLGGVRINKGAT  
VILSPYVTQRMATAWWGPTAEAFDPERFAAGREAADGRHRYAYYPFGVGMH  
RCLGEHLFNLEAILIVATLLSRFRFALTDTSMPGVKVAASTRPARTVEMI  
LKPVAVPPAR

>CYP105AB8 (2518451465) *Salinispora arenicola* CNP105

MTETASSRHTDTEFPVQRECPFAEPVEYEQIREQSSIAMVRLTGGGEAWW  
ISGHEQGRAVLADRRFSSDRKANFPFVSTDPAIRKRLHAQPLSLISMDG  
AEHTQARRALIGEFTVRRLAALRPRIQQIVDQCIDEMLTTDQHRADLVKT  
LSLPVPSLVICELLGVYPADHDFQEHATLVRRNTASEVRQHSIDELNA  
YLGALIDRKLASPDLLGRQIARQHRDGTDFDRSSMVSLAFLLLVAGHET  
TANMISLGVVGLLQHPEQLAMIKDDDPDKTPLAIEELLRFFTIVDSVTSRV  
ATEDVRFGDDTTINAGDGVVVSGLSADWDPTVFADPDRLDLERGARHHLAF  
GFGPHQCLGQNLARLELQIVFDTLFHRIPTLRLAAPLDKIPFKTDAAIYG  
ARELPVAW

>CYP211C1 (2518451745) *Salinispora arenicola* CNP105

VVDVEELLTRLYSAQGRQDPFPVYADLHAQGPIAALPPEPERRRVAAVAV  
GYDLVGAVLRDPEWSKAPPPGWTEQEILRTLQTSMMFINPPDHGRMRHVF  
AGTFTPRRLGALEPVVNRVADELLDRMADAGAGGLDFVAEFAYPLPARVM  
AEFIGIPETELDWYRERVDVIDAFLDVAGKTPQRLAAANAAGAELEAFYG  
ELLARRRRTPGEDLISGLVEAVDAGGVELTEDELVSNLIVLFNASFVTTV  
YMLSNGLPVLLAHPEVAAALATDPVLTAGAVDEILRLQAPVHLLARAAPR  
DTVLGGVPIPPQGQNVLLLIAAANRDPAHFPDPRDFPWRSGPPSLAFGLG  
LHYCLGAAVSRLEGRALPRLLSRFPRLRIMEQPVYSGSLFLRGIDKLSV  
SPGEGSTRE

>CYP107FJ2 (2518451901) *Salinispora arenicola* CNP105

MSETLSTSVLLADAAEQRAWRAKLRGAGPVHRITTSGETGWLIVGHEEA  
RNALVDLRLQGRATVGHGRMPEDLERALNSHMLNVGPPDHTRLRLRVS  
AAFTRRRIEQMRPIQELTDELLDGLAGADEADLVAGLALPLPMRVLVDL  
FGIPAEDCADFNVTWKVLTSAAGVLDRLTTAAGEMVAYLRGLLDRKRQV  
PESDLLSALVAVRDGADRLSDDELTSMVYLLLTAGYETTVNLIGNGLLNL  
LANPEQLVAFKADPDLQPQVVEAMRFDSPVQIAVRHSTEPVEIAGQAIP  
SGALILVSLWANRDPDRFTEPEAFRVDRQDNPQLGFGYGFHHHCIGAPLA  
RMEGTIAIGTVIRRFALRLAHPAGSLTWRASMVMHGLTALPVHLR

>CYP154M20 (2518451908) *Salinispora arenicola* CNP105

MERCPYVLDRAGRDLHGEAKALRARGPVTLVELHGGYTAWSVTSYEIAKQ  
LLVDPRI SKNTKETWPEFREGKVPQDWELYTWVAMDNMQTRDGEEDRLR  
KLVAQAFTTRQVAKVRPMIEDIVDRLLDDLEKVPAGEVVDIKGRYFYPLS  
TILVCDLLGIPEADRAEALHGTVVNARTTNSAESEANLHQWSALSCLV  
ETKRREPGNDITTLIIKAREDEQAPLTDDEVIGSLHLLIGGGTETTSNVL  
CNTLIDLLTHPDQMAMIRSGAVGWEEAWEVEVRKDGAVGSMPPFRCANADI  
EIGGVTTAKGDLVLINAAAAGRDPERYGDTTAEFDITRADKTNLSFGYGR  
HRCGLPALATMEAMISLPALFERFPDLVLAVPREELKPQGTFFVFNHYAEV  
PMLLRS

>CYP248A2 (2518451930) *Salinispora arenicola* CNP105

VLADAVTAFDPTAVDVRRDPYPSYHWLLRHDPVHRGAHQVWVVS RFADVR  
AVLGDKRFARTGIRRFWTDLVGPGLLSQIVGDIILFQDEPDHGRLRGVVG  
PAFSPSALRRLEPTIEATVNDLLRPARALGAMDVVADLAYPLALRAVLEL  
LGLPAGDANAIGRSRAVGRTLDRGATAEDMRRGHAAIAEFTDYVERALA  
ERREDGADLLALMLAAHRSQLMRNEIVSTVVTFFITGHE TVASQLGNGL  
LSLLDHPEQLELVRRQPHLVPPQAVEECLRFDPVQSNTRQLAADVELHGR  
RLRRDDVVVVLAGAANRDPGRYDRPDELDIRRDPVPSMSFGAGMRYCLGS  
YLARLQLRTALGAMVALPDLRLVCNPNELAYQPRTMFRGLTRLPVAFTPA  
G

>CYP105W2 (2518451937) *Salinispora arenicola* CNP105

MTGYQDRPTGDQPGAPVPSGSTDPGIGAFPLPRRCPFSPPAEYARLRAEH  
PVVRLPMLGGDTAWVVS RHADVRQVLS DPRMSADRRRP GF PKFAPTTEGQ  
RQASFANFRPPLNWLDPPEHAICRRQIVDEF SVRRVRQSRALVERVVDTH  
LDALTAAPGADLVSTFAYPVSSQV ICEVLGVVPYGEHEFFERRSTLMFRR  
STPADERARCAREIRD FLDVVVTDKEHRPGDDL S RLLYRQRRAGGVDHE  
AVVSMAFVLLVAGHVTTSNMLALS VLALLTHPARLARLRAE PERFPAAVE  
ELLRYFTVVEAATARTATAEVTIGGVTTAAAGEGVVALGQAANRDP RVFEH  
PDEFDPDRDARAH LAFGHGRHICPGQHLARLEMEVALSRLFRRLPGLRLT  
MEVSDLPLKEDSNIFGLYALPVAW

>CYP154M13 (2518451950) *Salinispora arenicola* CNP105

MSTGRPVVLDPTGRDIHGEADHLRALGPATLVELPGGVLAWSINSYEVGK  
ALLSAPNVSKSARRHWP AFYNGEIPPDWEMISWVAMDNISTTFGGDHRR  
RRLTAKAFGSRRAEQVRPMATHMVNTLLDRMADAADAGEVVDLKAAFAYP  
LPGMLVAELIGMSEEARVAAAKVIDMMTATNITPEQAQGVLLGWRDAITD  
LIALKRAQPGDDITS DLIARDEDGSLLTEQELVDTIFAILGAGSETTIN  
FFDNAITQLLTHPEQLELVKSGQVSWDDVIEEVLRLSPLASLPMRFAVE  
DIQLDGVTIHKGDPI LINYAALGRDPALHGESAGVFDVTRQHKEHLSFGH  
GAHYCLGAGIARMVAKTGLSALFERFPRMTLAVSAKDLVPYPTFIMNGNR  
QLPVHLSGALTWREGEQSALGRA

>CYP154M21 (2518451951) *Salinispora arenicola* CNP105

MEKCPYVLDRAGSDIHKEASNL RARGPVTLVELHGGYTAWSVTSYEVAKQ  
LLMDPRI SKNTKAHWPEFRDGNVPQDWELYTWVAMDNMQTRDGKEHDRLR  
KLVAFAFTGRQAVKSRPIIEEIVNRLDDLETA PRGQAVDIKARYFYPLS

TILVCDLLGIAEEDRDVILHGNVNSKTTNTAESEANLHQWQTALGRLV  
ETKRRDPGDDLTTVIIKAGEDEQTPLTDDEVIGSLHLLIGGGTETTANVL  
CHTVVMDLTHPDQLAMVRSGAVSWESAWEEEVKRDGAVGSMFRCATDDV  
EIGGVTTIAKGDVLVLINYAAAGRDPERYGDAAAEFDITRADKANLSFGYGR  
HRCGLPALATMEAMVALPALFDRFPNLALAVPPNELKPQGTFFNGYAEV  
PLLLRS

>CYP166A4 (2518452066) *Salinispora arenicola* CNP105

MTDAISFELPWARTDKFDPPTVFDALREQRPLARMRYPDGHVGVWIVSSYE  
LVREVLGDPRFSHSCAVGHFPVTHQGQVIPTHPQIPGMFIHMDPPEHTRY  
RRLLTGFTVRRTSRLTGHVEGVATEQIEVMREHGAPADLVATFARPLVL  
RVLSGLVGLPYGERDRYLHAVTLLHDAEADPAEAAAAAYEQAGAYFDEVIE  
RRRRQPEDDLISTLVGDGELTGEELRNIVTLLLFAGYETTESALAVGMFA  
LLYHEDQLARLRADPTKIDAAIEELLRYLTVNQYHTYRTASEDIELHGEV  
INKGDSVTVSLPAANRDPARFACPAELDIERETS GHVAFGFGI HQCLGQN  
LARVELRAGLSALLRAFPNRLAVPADEVPLRLQGSVFAVKNLPVCW

>CYP163B16 (2518452456) *Salinispora arenicola* CNP105

VTAADPGRVSGESQTPAHTVDLADPATFANRDLTGFWQQLRDEEPIHWN  
PPTSGRRGFVVVSRYADILDVYRDDVTFTSERGNVLVTLLAGGDAGAGRM  
LAVTDGPRHAELRKLLLRALGPRVLAPVCAAVRANTRQMVREAVTKGEC  
FASDIASRIPMMTISNLLGVPDADRAFLSLTKTALSADDESISETESAM  
ARNEILLYFQDLMEFRDHPGEDVVSMLVNSTIDGAPLSDDDIVLNCYSL  
IIGGDETSRLTMIDSVNTLAAHPKQWRRLKDGQCEIDKAVDEVLRWASPS  
MHFGRVAAKDTILRGVQIRADDIVTLWHASGNRDERVFHRPEVFDLGRTP  
NRHLSFGHGPHYCIGSYLAKVEISELLIALRDLTSGFETTGEFPQIRSNL  
LTGFSTMPVRFPDRAGLARDALDG

>CYP107AY2 (2518452677) *Salinispora arenicola* CNP105

MTAEPTPIPRSGARLGQEYDQLRKTGDVHQVLLPDTSLAWLVTNPEVAAR  
ALADPRLALNRRNSRGGWSGFALPPALDANLLNLDAPDHTRLRLVGPAPF  
SPQRVAALRPGIRRAAEHLDTLVATSGPTDLVTGYCNPLSVQVIADLMG  
VPEAGRTNLRATDMLTSYPPDRDAIRQAVTELHGYYVVDLIDIKQQQPG  
DDLSSALVTIEQDGDRLSRDELTSALFLILFAGYENTANLIASAVLWLLD  
HGGLNVVPSSEAIEGTLRHEPPAPVAIRRFPTEDIIIGGV TIPAGDTVLL  
SIAAATRGADGNAARLAFNGPHYCLGAALARVEAEALTVLARRLPGLT  
LAVPPSQVRWRPTFRTHGPAELLVGW

>CYP162P1 (2518453047) *Salinispora arenicola* CNP105

MGLPSEVDLAEPDLADPDLYAEGDPDAEWAWLRAHRPVYRNPAGATAAEFW  
ALTRYRDALQVYRDPSTFSSERGMVLGVDPVAGDPAAGRMLVVTDPPRHP  
KLRRIVSGIFVPRTMHRLEGRVRS LVDQLLHRVVDGAGRCDFANDVAARL  
PVAIIICELLGVPADEQDWMYHLTSTAFGGGDPAGSAEVS AVERAEAYGDI  
LLYYGELAAERRRRPGDDLVTLLVHADLDGEPLDVEDVLVNCTNLIIGGN  
ETTRHAASGGLLALAQRPELWRRRLRETPTAVPTAVEEVL RWTTPGMHVLR  
TATRDTEIGGVPIRAGERVVVWNAANRDEDFADPQRFIDRSPNRHIA  
FGQGGHHCLGAALARLELTILFEEMAKQVTNVRLTGPVRRVRSCVLRGIR  
ALPVELVT

>CYP105BL2 (2515754706) *Salinispora arenicola* CNX482

MSSHSAAPDPETATPLHTLAPELTFPQFERSTPFDPPQAYTELSGRCPV  
APVSMADGKPSWLITSFEGVRTTSLSDPRFSSDMSHPGFNRTGKPVDDL



KDTLGAMDGERHRYRRLMTGELTVRRAKAMRPVITQITDEALDQLAAAG  
PGADLVKHVAFVVPSPRVACHLVGIPFSDYERFTGMAATLMDSTSSADQFA  
ALQNMVSYFDTLVTDREHHDRDDLLGHMVRRYLASGELTRDMLIRLAWTT  
MAAGQETTAHMIIGLGVAALLRHPDQLELLRREPHLLPGAVDELMRYLPLI  
QFGIPRVAMDDVEVDGQTVTAGEGVVTLPPPLANRDPVFERPDELDVRRN  
ARQHLLTFGYGPHQCPAHALARLELEVYGRLLERFPTLRLADSDADLKVQ  
DKDIMYRVSELAVTW

>CYP211B2 (2515755548) *Salinispora arenicola* CNX482

MDVSEAI AVLISPSGRLDPYPTYEQLRAHGVPVSRTTAGLFVV TG YAEADM  
VLRDPRFVVLDDDLRDDVFPHWQDSPAIXIARSMLRTNPPDHSRIRRLA  
AGAFTPRRVAAMREVVTAQADELVDEMIRAGRDGARVDFMDMFAYPLPVA  
VICALLGVPAADRSRFRRWAGDLTGILEPEITPEELAGADAGADELRDYF  
TGLIEQRRRAPADDLTALVQAHDADGDRLSGEELLANLVLLVAGFETT  
TNLLGNGLVLLTRPEAAAAALRDEPD LAPGYVDELLRYDSPVQLTTRTVR  
ESVSFAGTELPAGSWLLVLLGAANRDP RRFPD PARFDPWRAQSQPLSFGA  
GPHYCLGAGLARLEAQVAFPLLLRRLPELALAGRPSRRTRLT LRGYETLP  
ITVGAVTADRGT PAGVAPGTP

>CYP245A7 (2515755668) *Salinispora arenicola* CNX482

MPSATLPRFALTGWSRENIVNPYPVYQRYREVASVHRGEPGGDAPDTFYV  
FSYDEVVQVLSSNCFGRGRSLDAAKASVPVPAEQKALRAIVENWLVFMDP  
PRHTELRSLNRSFSFPRIVTELRPRIARIAQELL SRLGQQVDVDLVESFA  
APLPILVISSELLGPIEERRAWLRANALALQEASSSRAGRVDVDGYARADVA  
AQEFTEYFREQVRLRRGRAGGDLITILANAQERGAPVSLDAIVGTCVHLL  
TAGHETTTNSLAKAVLALREHPAVLDEL RGAEGLTDDAVEEFLRYDPPVQ  
AVTRWAHQD TT LGGCDIPRGRSVVALLGSANRDPARFPSPDVLDVRRPAD  
RHLSFGLGIHYCLGATLARAEEIGLQALLDGVP T L GYGTQHVDYADDLV  
FHGPSRLVLVNLGERCK

>CYP244A4 (2515755672) *Salinispora arenicola* CNX482

MSTTTNTELTEAPETNMPVDPGLFDCMPDLIAAARVAPVVRIPYLGRHAW  
VVCDELVKQALTHPKMGKDIALVPEWMRQPGLMVTAQPDPEYARAMIMS  
DGENHARIRRIHAPVLSRPNTERWGERVADKVEGF LDELSQAGSGGSTEV  
NVVTNYTHKIPLAFISEMLGLPPEAEHRLRGITDIMLYSSDYAARREAIG  
GLFGAVEDWVRNPADLRDGVITGLLAASDGPDAAVTEGEVIVWTLGMIIT  
GYETTGSLISTSLYEAIRPPHERPKTDEDITAWIEETLRVHPPFPHTW  
RFPLEDIELGGYLIPKGAPVQVSIAAANRKPGE GADSFDAERRGHGHL SF  
GLGMHYCIGAPLVRLEAQIAVRGFLRRFPQARLSAETAVQWESEWMIRRM  
SVLPAVLS

>CYP208A12 (2515755837) *Salinispora arenicola* CNX482

MTLDTITPRVPLGPPTAALRMLLV MKRDR LGMLTSAAARYGDASRLPVG  
HKALWFFNHPRYAKHV LADNSANYHKGIGLVHARRALGDGLLTSEGLWR  
KQRKVIQPAFQSRRIAQQAGMIAEEAFALVERLRARAGAGPVELTAE LTG  
LTLGVLGRSLLDADLAGFDSIGDSFATVQDQAMFELET LNAVPMWIPLPR  
QIRFRARRRKLQAVVDTLVDGRAGNLADRVDVLSRLILSARGEADPRVGR  
ERLRDELVTLLL AGHETTASTLGWTL SLIDRH PGVWERLHAEAVEVLGDR  
LPEYDDLRLRLRYTVMVVEEAMRLFPPVWLLPRRALAPDTIGEYRV PANAD  
VVISPYTLHRHPEFWPNPERFDPERFAPGQAADRPRYAYLPFGAGPRFCV  
GNNLGMMEAVFVIALLCRHLRLTGVPGYRLVPEPMLSLRIRGGGLPLVVRP  
VS

>CYP154M5 (2515756365) *Salinispora arenicola* CNX482

VEQSCPYKLDVTGRDVAEAGEAIRARGPVAQVELPGGVQGWSVTGYQAAR  
QVLADPRFAKDPKKWPAYTSGAIPPNWPLIGWLLMDNMTTNDGADHQRLR  
KLVSHGFTPRQVERTRPLIVKIVNDLLDGLSSAGPDEVVDLKGRFATPLP  
ARVICDMFGVPEALRASVLRGAQVNVNTSSISGEEAEANVEQWHRELLELV  
EAKREKPEDDMASLLIAAKEEDGSTLTQEEVVGTLHLMLGAGSETLMNAL  
SYAVLGMLSNPGQYEMVRNGTSSWDDVIEETLRAQAPVAQLPLRYATEDV  
AVGGAVIKAGDPVLMGFTAIGRDPVHGETAGDYDITREDKTHLSFGHGV  
HFCLGAPLARLELKIALPALFERFPNMTLAVRPAQLEPQGTIFMNGHREL  
PVRLGQPATVLA

>CYP105CT1 (2515756382) *Salinispora arenicola* CNX482

MNSPNHMPADRSLTAPTSGCPMALSRGRVGLDVADEIGELRDGGRLGRIT  
TAFGQEATLITRYDEVRAQMADSVVFNVAGVPSPPALVDGGFDTESVRRR  
RTVGNLIMLDPPEHTRLRRMVAAWFTTRRVERLRPRVVEIIDAALDEMER  
SGPPVDLVAMFAKTVPITVICELIGVPEELRERYRRRAERAVSASAVSTP  
LDELRLREAGWVSRELIEYHRENPSDDIIGMLLREHGTDSHDDGITDDE  
LVGLANALLIAGHETTTQMLSMGTLALLRHPDQLALLRDDPSIVAGAVEE  
LLRYVGVVLHGGFVRVATRDTRLGGHRIHAGELVVPALTAANRDPRLITDG  
DRLDITRPPTSHVAFGHGVHFCIGAPLARMELREAFPALLRRFPGLRLAV  
PDSELEFTQGTTVYSLRGLPVTW

>CYP105J3 (2515756773) *Salinispora arenicola* CNX482

MTDSVAFPQGRVCPHQAPAGYRPLAVQRPLAQVTLYDGRRVWAVTTRDLA  
RRLLVDPRISSDRNTNPAWPAIVPIVAAAVNDAQQKVLKIATALVGTDGPE  
HKAQRKMLIPSFTRRMNALRPMIQEIVDQQLDDEMIKSGAPTDLI PAFAS  
AVPVTVLYRLMGIPDDDHGIFEKLSHQLLAGPNANEAYDQLMGYMSRLIA  
ERRRNPEGVLDLLAQHGANDDADHDGLVSTLVVQVAGNHGTTGSMIAL  
GLFALLQHPEQLAELRADPSLMPTAVDELLRFLSVPDAVTRLAADDIEVE  
GTIIRKGDGVFFITSLINRDTDVHDAPNSLGWHHASAADHLTFGFGAHQC  
LGQSLARITMEIALGALIDRLPGLRLAVPAEEVPFLPAASLQVIAELPIT  
W

>CYP107Q4 (2515756986) *Salinispora arenicola* CNX482

MTTTAETS AETIDLFSPEVVADPFGWYARLREETGPTTGTLNIGTMMGGP  
EMWLVTTRYEDVRQVLTDPRLTNPPADSPLEDIRAGVFKRLDFPPDLIPW  
MANLLNVSDGEDHTRLRKLVSYALTAHRIGKLRPRVEKITADLLDKLAED  
GKDGSPVDLVEEYCYPLPVTVICELVGIDEPRPHWRWAGDSMATMNGER  
IPTTLVKCIELARELIAKRAEPQDDLVTALVQAQAEQNRVSDDEIIGI  
LFSLVTAGHQTTTYLIGNSVILLLENPDQLARLKENPSMWFPQAVRELQRL  
GPIQFAQPRFPSEDIELGGVTIPRGAPVAPLLLAANTDPRRFPDPNKLII  
DRLAVGSEHGLGFGKGIHRCLGQHLYQEAEEVALQGLFTRFPDLSLAVPR  
EEIPWILRPGFTTRTRLPLKLV

>CYP105G5 (2515756987) *Salinispora arenicola* CNX482

LTIETTETTPPADDSLAPLPRQFMQRDDPSKLPPALAALAEQSPVGRSTL  
PDGDPFWMVSGYDEARAVLSDPRFSSDRFRYHPRFKKLSGELGERLRNDK  
ARAGSFINMDPPEHTRYRKLLTGQFTVRRMRQLTVRIEQIVTEQVDVMLA  
EGNSADLVSAFAVPVPSLMICELLGVRYEDRTEFQRRRAAGLLQTDLP IKQ  
AVENLEAQRAFMQRLVTDKRRTPADDMISGLVHHAGAEPPLTDDELVGIA  
TLLLFAGLDTTASMLGLGMFMLLQRPEQMAVLRDDPSRIGDAVEELLRYL  
TVVSTGLFRFAKEDVVLGDEHIPAGSTVVVSLMAANRDGRHWPEPETLDV  
TRVRSSHLAFGHGVHQCLGQQQLARIELTVGITELLRRLPNVRLAVPPADV  
PLRNDMITYGVHRLPILWDTF

>CYP1051A1 (2515757011) *Salinispora arenicola* CNX482

MATDAAITRARTVPAWKALPAAVRDTHRAFDVGNWSDGDVVRVSLGVSR  
PYLVTNPAHVQEV LHERAAIYPRGDDTALWRSVRKLVGDGILAEGDWAAA  
SRRVLAPMFRPARINAMVDTMADAIAGAIDDLHGAATAGTPIDVGRELSR  
IVCSAIMRVFFADRITVRDALRIMKAQETIVTAMAPRILAPLVPWWIPMP  
GDRRFRAAVRSIDDILLPVLRQAQRQPDDGDDLLSRLVRARADDGRALSE  
KRMRDDLVSMVAVTETSTVVLTLWLWPLLANHPDVANRLYDEIDRVVGGG  
PVRGDHLAELTYTRMVLDELLRLYPAGWILPRRAATTDILGGVRINKGAT  
VILSPYVTQRMATAWWGPTAEAFDPERFAAGREAADGRHRYAYYPFGVGMH  
RCLGEHLFNLEAILIVATLLSRFRFALTDTSMPGVKVAASTRPARTVEMI  
LKPVAPVPAR

>CYP211C1 (2515757308) *Salinispora arenicola* CNX482

VVDVEELLTRLISAQGRQDPFPVYADLHAQGPIAALPPEPERHRVAAVAV  
GYDLVGAVLRDPEWSKAPPPGWTEQEILRTLQTSMMFINPPDHGRMRHVF  
AGTFTPRRLGALEPVVNRVADELLDRMTDAGAGGLDFVAEFAYPLPARVM  
AEFIGIPETELDWYRERVDVIDAFLDVAGKTPQRLAAANAAGAE LRAFYG  
ELLARRRRTPGEDLISGLVEAVDAGGVELTEDELVSNLIVLFNASFVTTV  
YMLSNGLPVLLAHPEVAAALATDPVLTAGAVDEILRLQAPVHLLARAAPR  
DTVLGGVPI PQGQNVLLLLIAAANRDP AHFPDPDRFDPWRSGPPSLAFGLG  
LHYCLGAAVSRLEGRALPRLLSRFPRLRIMEQPVYSGSLFLRGIDKLSV  
SPGEGSTRE

>CYP125A41 (2515757449) *Salinispora arenicola* CNX482

MTEPRIPAGFDFTDPEVLAHRVPREEFAELRRTPVWWNAQPRGSAGFDD  
DGYWVVTRYADVMTVSRSDTYSTRENTAIARLRPDTTREDIEMQRVIML  
NVDPPPEHTKLRAIVSRGFTPRAINALRGSLAERA EHIVRDAAVRGVGDV  
TDVACELPLQAIAELIGVPQHRRKVFWDWSNQLIGYDDPAYGTDPLTASA  
ELLAYAMEMAERQ RSPSDDLVT KL VNAQIDG EHLTTDEF GFFVMLLAVA  
GNETTRNAITHGMVAFLDNPEQWELFKAERP KSAVEE IIRWATPVNVFQR  
TALVDTVLGGQAISAGQRVALFYGSANFDEAVFEDPERFDITRSPNPHLG  
FGGSGAHFCLGANLARLEIELIFNSIADHLDPDIRKVAAPQRLRSGWINGI  
RQMPVRYR

>CYP107FS2 (2515757515) *Salinispora arenicola* CNX482

MPVPQGEQNLTTTEVFADPKALFATLGSRQPLHRISLPDGMFAVLVTGNRE  
ARQALSDPRLVRSITAAAPELHKYHPLASDDYALSRHMLFADPPDHGRMR  
KLVSTAFTRRRVEQMRPRIQQITDDLIDVIAAKGEADLVETLALPLPIAV  
ISEMLGVPPFADRSEFERHAEVLTGINASSGFDAIIAAGRWFDEYLAELVQ  
QRRREPQDDLISGMLAAQDKGDR LTDVELRSNALLLSAGFETTVNLVAN  
GLLALLRHPEAMAALRSEPNLMTTAVDELRLRYDSPVSCVTYHFAQEPVEI  
GGFEIRSGEHVVIAAAAANHDPTVFADPSRLDLRREGSGQILSFSGIHF  
CLGAPLARLEGEIAFGTVLRRLAGLTLAVPTDSL VWKASFVLHRLERLPV  
TFTPDRA NPIDSVHTV

>CYP105CN1 (2515757516) *Salinispora arenicola* CNX482

MAAPAPQATQSTTPHPPSYPLPRECPYRPSAGTARLRDAGPVSTVRLYDG  
RTAWLVTGAAEARALLADSRVSNRADFPNYPVM DERHLSMRATREMAREE  
EGGFAAALFGMDPPEHTRQRQLLLPRFTVRQVAARRPAIQRIVDEHLDAM

EANGSPADLVSAFATPVPTMVVCTHLGVPHYQDRTRFEPVAVAGLFEPDRAD  
AAMAELTAYLHQLIETKQSEPGDGVIDHLIANHLRPGAIDRAELVAIASA  
ILVAGTVTTSSAIALGTLALLTAPGQYAALVDNPDLPVGA VNEILRYLSL  
VEQLARVATEDIEIGGKLIRAGDGIIVSFAAGNLDPNVTHPDRLDVALP  
PTNHIAFSHGIIHCIGQNLALLELDIAFRALVSRFPTLRLAVPAEQLPY  
FAGDVPRLACLPVTW

>CYP105CP2 (2515757518) *Salinispora arenicola* CNX482

MTKSMPVQDLPAFPIPRECYPYRPSAQHVSLRSGGPMKVRVLYNGRTAWLV  
TDSAHARAVLSDYRRVSIKPYHGNYPLLNEEFEKVVD SGYADVLFGVDP  
EHTRQRQMIMPSFTLRRTAVLRPDVQRIVDDKLDMMRHGAPGDLVTEFA  
QPVPSMVM SFL LGVPWEDHEEFETPAHKLFVPELAEEATTEL GAYLERLI  
QKKEQPGGTGGTGLLDDLRDHLRAGALSRDELVHIAMAMLVAGTDTT  
NVISLGTALLDNPDQWAALRDDPDELIPGAVEEILRYTSLIEAFARVAV  
SDIELNGAVIKEGEGILISSAGVNFDPALAPDPGRFDIRRPPRPSFSFSH  
GIHRCPGDNLARLELEIAFRSLVTRMPNLR TAKPIDQIPSNNDGTLQRL  
YELPVVW

>CYP105W2 (2515757672) *Salinispora arenicola* CNX482

MTGYQDRPTGDQPGAPVPSGSTDPGIGAFPLPRRCPFSPPAEYARLRAEH  
PVVRLPMLGGDTAWVVS RHADVRQVLS DPRMSADRRRP GPFKFAPTTEGQ  
RQASFANFRPPLNWLDPPEHAICRRQIVDEF SVRRVRQSRALVERVVDTH  
LDALTAAPGADLVSTFAYPVPSQV ICEVLGVPHYGEHEFFERRSTLMFRR  
STPADERARCAREIRDFLDMVVTDKERRPGDDVLSRLLYRQRSAGGMDHE  
AVVSMAFVLLVAGHVTTSNMLALSVLALLTHPARLARLRAE PERFPAAVE  
ELLRYFTVVEAATARTTTAEVTIGGV TIAAGEGVVALGQAANRDP RVFEH  
PDEFDPDRDARAHIAFGHGRHICPGQHLARLEMEVALSRLFRRLPGLRLT  
MEVSDLPLKEDSNIFGLYALPVAW

>CYP248A2 (2515757680) *Salinispora arenicola* CNX482

VLADAVTAFDPTAVDVRRDPYPSYHWLLRHDPVHRGAHQVWVSRFADVR  
AVLGDERFARTGIRRFWTDLVGPGLLSQIVGDIILFQDEPDHGRLRGVVG  
PAFSPSALRRLEPTIEATVNDLLRPARALGAMDVVADLAYPLALRAVLEL  
LGLPAGDANAVGRWSRAVGRTLDRGATAEDMRGHAAIAEFADYVERALA  
ERREDGADLLALMLAAHRSQ LMSRNEIVSTVVT FIFTGHETVASQLGNGL  
LSLLDHPEQMELVRRQPHLIPQAVEECLRFDPVQSNTRQLAADVELHGR  
RLRRDDVVVVLAGAANRDPGRYDRPDELDIRRDVPVPSMSFGAGMRYCLGS  
YLARLQLRTALGAMVALPDLRVVCS PNELAYQPR TMFRGLTRLPVAFTPA  
G

>CYP166A4 (2515757834) *Salinispora arenicola* CNX482

MTDAISFELPWARTDKFDPPAVFDALREQRPLARMRYPDGHVGVIVSSYE  
LVREVLGDPRFSHSCAVGHFPVTHQGQVIPTHPQIPGMFIHMDPPEHTRY  
RRLLTGEFTVRRTSRLTG HVEGVATEQIEVMREHGAPADLVATFARPLVL  
RVLSGLVGLPYGERDRYLHAVTLLHDAEADPAEAAAAYEQAGAYFDEVIE  
RRRRQPEDDLISTLVGDGELTGEE LRNIVTLLLFAGYETTESALAVGMFA  
LLHHEDQLARLRADPTKIDAAIEELLRYLT VNQYHTYRTASEDIELHGEV  
INKGDSVTVSLPAANRDPARFACPAELDIDRETSGHVAFGFGI HQCLGQN  
LARVELRAGLSALLRAFPNLR LAVPADEVPLRLQGSVFAVKNLPVCW

>CYP1005A1 (2515758103) *Salinispora arenicola* CNX482

VSAVLFRSWTKTAGTRWPDVTRVADQSGTEHLVVTRHALVRQVLTQATY  
RPDNAMEAVTPIPVAVLRVLAGHRFRLPPTLANNGGVSHPAIRALVADAL  
HPTKVAAQRPWLTGLVADRVASIRTTLDSSGGPVDLYADLTADLPLLVLAR  
LVELPDAPVNAVKKQFARAALFLWAPLDADRQLALADEVGRFHQVLRIFA  
DTGGGLAAALRATGHSPDVLVGALFFLLVAGQETTSQFLTLLHRLSGEP  
TIRAALRAGSISVADVVEEGLRLEPPIVTWRRVAAVDSTLGGTTVAAGTS  
VLLWLARAGRDPVVAAPDEFPRPGQRGSRRLAFGAGAHRCGLGDLARME  
AAVVVEQATPLLDGVTVVRPPWYPDNLTFRMPDAFVVR

>CYP105AB8 (2515758684) *Salinispora arenicola* CNX482

MTETASSRLTDTEFPVQRECPFAEPVEYEQIREQSSIAMVRLTGGGEAWW  
ISGHEQGRAVLADRRFSSDRKANFPFVSTDPAIRKRLHAQPLSLISMDG  
AEHTQARRALIGEFTVRRLAALRPRIQQIVDQCIDEMLTDDQHCADLVKA  
LSLPVPVSLVICELLGVADHDFFQEHTATLVRRNTASEVRQHSIDELNA  
YLGALIDRKLASPDLLGRQIARQHRDGTFRSSMVSLAFLLLVAGHET  
TANMISLGVVGLLQHPEQLAMIKNDPKTPLAIEELLRFFTIVDSVTSRV  
ATEDVRFGDDTTINAGDGVVVSGLSADWDPTVFADPDRLDLERGARRHLAF  
GFGPHQCLGQNLARLELQIVFDTLFRHRIPTLRLAAPLDKIPFKTDAAIYG  
ARELPVAW

>CYP244A11 (2563509557) *Salinispora pacifica* CNY646

MQDPAHTNLAEAPEVTMPTEWRPTDCLPELLAAARVAPVVRTPYLDQHAW  
VVCDELKQALTHPKLGKDVSLAPDWMRQPGQMTAMPPEYARMMVMS  
DGEHHARIRRIHTPVLSQRNAERWSERVAALVDGFLDDLDSTAGVEVNL  
TDYTHKIPLAFTAEMGLPPGAERRLHDITEVMLYSADYALRQQAVGELF  
EAVQEWVRNPAGLREGVITGLLASSDGPDATVTEGEAIVWTLSLIINGYE  
TTGSLISAALYEALRRPARERPHTDEAVAAWIEETLRVQPPVPHTTWRF  
LADLDLGGYLIPKGAQVQISLAAANLDPDEDTDKFDAQRRGRGHLISFGLG  
AHYCIGAPLARVQTKIALRGFLRRFPQARLSADTAPQWESEWMIRRMVSL  
PVLLA

>CYP107AY5 (2563509572) *Salinispora pacifica* CNY646

MRAELASIPRSGVRLGQEYDEFRIAGDVHQVLLPDSSMAWLVTDPVLVSR  
ALADPRLALNRKHSRGWGSFALPPALDANLLNLDAPDHTRLRLRVGPFAF  
SPQVRATLRPRIIRRTAEHLDDTLVAAGGPVDLVTGYCTPLSVQVIADLMG  
VPEAGRDLRTWTDMLTTPPDRAAIRRAVELHGYVNLITAKQQQPG  
DDLSSALVTIEQDGRDLRDELTSALFLILFAGYENTANLIASVLRLLD  
RGGIREVRVPEAIEETLRLEPPAPAAVRRFPTEELTIGSATVPAGDTVLL  
SIAAATRGTDGNATRLAFGNPHFCLGAALARVEAEEALSVALARRLPGLA  
LAVPVAQVRWRPTFRTHGPAELLVTW

>CYP211B20 (2563509908) *Salinispora pacifica* CNY646

MDATEAVTLLMSPLGRLDPYPTYERLRAHGPVVPTAAGYFVVTGYTEADT  
VLRNPRFGVMDDEERDDVFPWHQDSPAMMSISRS MIRANPPDHSRMRRLA  
AGVFTPRRVAALREVVAQAANELIDEMTRAGRGAADVDFMGSFAYPLPVT  
VICALLGVPAADWAQFRRWAGALTGILEPEITHEELAVADAGASGLRDYF  
TELIAERRRAPADDLTALVQAHDADGDRLSGEELLANLVLLLVAGFETT  
TNLLGNGLVLLNQESATALRDQPELAPRYVDELLRYDSPVQLTTRTVR  
ESVPLAGVELPAGSWLLVLLGAANRDPERFTDPAFDPGRAQSPPLSFGA  
GAHYCLGAGLARLEAQVAFPLLLRRLPELALAGEPTRRDLTLRGYETLP  
VTVGAAPADHGT PAGAALGTP

>CYP107AX5 (2563509949) *Salinispora pacifica* CNY646

MTARPAVVFDQRLLRDPYRRYNALRDQAPVHHVTRTPDGAPAWLVTRYDDV  
RAAFTDPRLSVDKRFSTRDGEHGSSLPPELDAHLLNRDPPDHTRLRLRLAA  
AAFTPRRVADLRPAVERTVSTLLDGLAGDGHAEIIGSLAAPLPLRVMHEL  
LGLPTQASVDFRMWTNTLLSADANQPAQSRSAMANMRRFLIEQVAHKRAR  
PGNDLLTGLLAAREDDRLTDDELVAMLFLLMFAGYDNTAALIGNVVHAL  
LTNAELPAAVRTGSLALDELVDGVLRWNPFSFPLAVRRFARESITIAGQKI  
PAGDRIWLCLASANRDPEQFTKPDELGIVDMRRPHLSFGHGIHYCLGAPL  
ARLQTI VAVTSLDRFPGIRLAVPAHTIRWRESFRLRGLVALPVFL

>CYP107AW5 (2563509969) *Salinispora pacifica* CNY646

MEPVTGTPSPPPVPYVADPYPALARIRANGPVSI LHSDEGMAMWVIARYR  
NVRAALADPRFGQDARRAQTLADNRVSGVTLGGDIVHMLNSDPPDHTRLR  
RLVQGAFTARRVAAMRPLVERITTSLLDGLAGRRTVDLVQDFAFPLPMLV  
ICELLGFPAEERSAYRSWSTAILTHNDDPAAFATALREMTDYIAVQLRIR  
QTHPGDDLLTELLAARDAGQLTDDEIVGMVFLLLIGGHETTNNLLGTATL  
ALLRNPDQHRWLLANPHALPEAIDEFLRYESPVAMATLRFTTTSVTVDDV  
VIPADELVLVSLGGANRDPDRFPDADRLILDRGDTGHLAFGHGLHRCLGA  
FLGKLEGEVALGALLRRHPGLTLAAEVRQLRWRDTIMLRGLESPLVSLHG

>CYP245A14 (2563510040) *Salinispora pacifica* CNY646

MPSVTLPFRFTLTGWTREDIINPYPVYQRYREVAAVHRVEANGDAPETFYV  
FSYDEVAQVLSSKCFGRGRSLDAAAASVPVPTDQKALRAIVENWLVFMDP  
PQHTELRSLNRSFSPRIVTGLQPRIARIAQELLGRLGQQVEADLVAGFA  
APLPILVIAELLGIPAERHGWLRANAMALQEASSARARRDVG YARAEAA  
AQEFTEYFREQVRLRRGSAGDDLMTILANAQLRGAPVALEAVVGTGVHLL  
TAGHETTTNALAKAVLALRAHPAVLEELRNADGLTAASIAEFLRYDPPVQ  
AVTRWTHQD T T L G D W D V P R G S R V V A L L G S A N R D P A R F P L P D A L D V R R P A D  
RHLGFGGLGIHYCLGATLARAELEIGLQMLLEGLPALGYS AQRV DYADDMV  
FHGPSRLILVNPGERFCS

>CYP244A6 (2563510044) *Salinispora pacifica* CNY646

MSATTNTELGEAPETTMPVDPLFDCMPDLIAAAARIAPVVRIPYLGRHAW  
VVCDELVKQALTHPRMGKDITLVPEWMRQPGLMVTAQPPPEYAQAMIMS  
DGDTHARIRRIHAPVLSRPNTERWGEQVADKVEGFLDELSQAASGSNAEV  
DVVTNYTHKIPLAFISEMLGLPPEAEHRLRSITDIMLYSSDYAARREAIG  
GLFGAVQEWRNPAGLRDGVITGLLAAVDGPAAVTEGEVIVWTLGMIIT  
GYETTGSLISTSLYEALRRPPHERPKTDADITAWIEETLRVHPPFPHPPTW  
RFPLEDIELGGYRIPKGAPVQVSIAAANKPKGEGADSFDAERRGHGHL SF  
GLGMHYCIGAPLVRLEAKIAVRGFLRRFPRLRSADTAVQWESEWMIRRM  
SLLPAVLS

>CYP125A15 (2563510215) *Salinispora pacifica* CNY646

MTEPRIPVGFDFTDPAVLERRVPREEFAELRRTAPVWWNVQPRGSAGFDD  
DGYWVVTRYADVMASRDSESYSTRENTAIARFQPGTTKADLEMQRVIML  
NVDPPHTKLRAIVSRGFTPRAINALRGSLAERAHIVRDAAVRGAGDFV  
TDVACELPLQAI AELIGVPQHHRKVFWDWSNQLIGYDDPAYGVDPLTAAA  
ELLAYAMEMADERQRNPSDDLVTCLVNAQIDGEHLTTDEF GFFVMLLAVA  
GNETTRNAITHGMLAFLEHPEQWELFKAERPRSAVEEII RWATPVNVFQR  
TALVD T T L G G Q A I S A G Q R V A L F Y G S A N F D E S V F E E P D R F D I T R S P N P H L G  
FGGSGAHFCLGANLARLEIELIFNSIADHIPDIRKAAEPQRLRSGWINGI

REMPVRYR

>CYP208A25 (2563510299) *Salinispora pacifica* CNY646

MTVIADRGGRVPPGPPATAGLRLLLLALGRDRLGMMTSAATEYGDVARLPV  
GPKRLYFFNHPDHAKHVLADNNANYQKGIGLVHARRALGDGLLTSDGELW  
RKQRRVIQPAFQNRRLTQYAGVVGQEATRLAERLATRVDPGPPVDVLDEMT  
RLTLGLVLRGRTLLDAELTGFRGVGESFAAVQDQAMFELETLSAVPTWIPLR  
RQRRFRARRRHLQEVVDVLA AERGQEV EGRDDVLSRLILSTRAEADPQVG  
RQRLRDELVTLLLAGHETTASTLGWSLHLLDQHPRLRDRVRHEATSVLGG  
RVPGYEDLHRLRYTAMVVQEAIRLYPPVWILTRKARGEDEVGGYRVPAGA  
DLLICPYTLHRHPRFWEDPERFDPERFDPAGLTNRPTYAYIPFGAGPRFC  
VGNNLGMLEATLVLAVLLRDLRLEGLPGRAVIPEPMLSLRVRGGLPMTVR  
RAD

>CYP154M17 (2563510325) *Salinispora pacifica* CNY646

MHETCPVLDTAGRDIHGEADRLRERGA AVKVKLPGGVLAWTVTGHSAIKK  
VLLDPNVTKNARTHWP AFINGEIPMDWELISWVAMDNMVTAYGAHLLQLR  
KLSAKAFTPRRVEMMRPRVVALVNQLLDDLAAAGDEVVDLRERFCYPLPA  
RTVADLIGMSEEHRQQTAKAMDMVDTTVTTPAQAEETLAGWRGAMAELIA  
EKRRSPGEDIASDLIAARDDENGAKLTDTELTDTIFAILGAGSETTINFI  
DNAVTALLSHPDQLAMVRSGQISWAEVIEETLRVECPLGNLPLRYAVTDI  
EIEGVTIPKGDPILVNYAAAGRDPALHGETAGQFDVTRPDKEHLSFGRGP  
HYCLGAGIARMVATVGLSTL FERFPDLALAVPKGELQPLPTFIMNGHRAL  
PVR LAAHREAAVAG

>CYP211C10 (2563511023) *Salinispora pacifica* CNY646

VLDVEGLLARLYSVQGRQDPYPVYADLHAQGAIAALAPRPERQ RVA AVAV  
GYDLVASVLRDPEWFKQPPLDWTEQEILRTLQSSMMFINPPDHGRMRHVF  
ARAFTPRRLGALEPVINRVTD ELLDRMADAGPGEVDFVAEFAYPLPARVM  
AEFIGIPEPELAWYRERVDRIDAFLDVAGKTPERLAAANVAGAE LRA FYG  
ELLGHRRRTPGEDLISGLVQAVDAGGVELTEDELISNLIVLFNASFVTTV  
YLLSNGLPVLLAHPEVAAAASANDPGLAAGAVDEILRLQTPVHLLSRAAPR  
DTVLGGVSI PQGQSVLLLLIAAANRDP AHFPDPDRFDPRRSGPSSIAFGLG  
LHYCLGAAVSRLEGR LALPRLLSRFPRLRILEQP VYSGSLFLRGIDKLSV  
SPGGREHP

>CYP113B6 (2563511306) *Salinispora pacifica* CNY646

MTQTDNAPAPPIDLPKGADAQGLLDWFAYMRKHWPVSWDESRQAWHVFN  
RDYLTVTTNPLIFSSDFSPVFPVPELALLMGPGTIGGIDPPRHGPMRKL  
VSQAFTPRRIAQMEARIETITADILEQVRNQDRIDIAADLAYPLPVSVIA  
DMLGIPNEDHEKFREWVDIILSNEGLEYPNLPDDFTETVGP AIAEWSEFL  
YAQIAEKRARPQDDLMSGLLGVEVEGRKLTDEEVVNIVALLLTAGHISSA  
TLLSNLFLVLEQHPEALAAVRADRS LVPGVVEETLRYRSPFNCVFRLLAQ  
DTEIFGQPMRKGQMVIAWIASANRDTEMFSDPDFTDIRRESNKHLAFGYG  
IHHCLGAFLARQEAKVFLNKVLDEFSEYTIHHDGVEFYDPDQLTARRLPV  
DVIRH

>CYP107LA4 (2563511307) *Salinispora pacifica* CNY646

MECPVTAEFSRSYPFSNRDTLTVDPTYAELRSKEPVARVRMPYGGGDAWL  
VTRHADARKALSDPRLSIAAGAGRDVPRASPRIQEAEGLMGMPPEAHARL  
RRLVATAFTPKRIRDIAPRVAGIVDGLVDDLIHADPPADLVRQVARVPV  
KTICALMGVPTEDQHIFRVFSEVLMSSTRYTDDQVEQAVQDFTGYLGGLL

AQRRANRTEDLIGAMLEARDNDDRLSEDELIMLTGGLLVGGHETTASQIA  
SHIFVLLRERTRYEKLCAQPELIPTAVEELLRVSPMWATVGPTRVATEDL  
ELNGASIRAGDAVIFSLTSANLDEDAFPDATEVVLDREPNPHIAFGHGPH  
FCVGASLARLEIQATIEALVRRLPGLRLAVKEDELEWHQGMIIIRSLVSLP  
VKW

>CYP1207A12 (2563511774) *Salinispora pacifica* CNY646

MITVPPTDRYLLDEDLVADPYPYLAELRVAEPVRWSPVHRAWLVTGYEAA  
ASCYAEPAISADRIGPMLAQTPLELLSPEAARAFTIMAGWMVFVDPPEHR  
RLRSVFRGAFGARQVRRNRPMVQEAVTRLTARTGTVGDTVDLVAEFARPL  
PATVAASWMGVPEEDTAMFQRWAIQVGDLAGTVQSPEEHERSQQALLDL  
FDYLRMLVRTRRATPGEDLISAALANGLVGDSVSEDEFVAMLTHVAFAGG  
ETTSNLIAGVTWNLLRRPDQLALLRAEPELAPVAIEELLRFDGPSKMSIR  
HVKNDVELAGQRLRAGQRLYVVVTAGANRDPDYFDHPNELDVRRHPNPHLG  
FGQGGHFCLGAPLARLVAGAALTDLLAAAPGLALATAEVRWQPSLLNRSL  
QELPVRF

>CYP162A9 (2563511873) *Salinispora pacifica* CNY646

MISPDLSDPITYQDGDPLPIWAELRREHPVFENRRADGSRFWAVMTHHLC  
TEVLTNPKVFSSANGMRLDSNPQVLARAAGKMLNVTDPQHDKIRKVSS  
AFTPRTIRRLEANMRATAGRAIDTAIADGGCELTRLAHTLPVSVICDLLG  
VPEQDWEFMAERTRFAWGSTAADDREEVEKVAHAITEIMAYFLDLAADRRK  
HPTEDLVSAHVHGEVDGRALTDDEVLYNCDALLSGGNETTRHATVGGFLA  
FMMNPGEWSAIRQNRDLISSAIQEIYRYTSPVMHSLRTATRDIDFGGMEI  
RSGEYVVAWLPSANRDEQVFEDSDRFNIRRSNRLHGLFIQGNHYCIGAGL  
ATMELRVMFDELLDRVSEVRLAGPVRRLRSNLLWGFDSVPVTFRLAATGG

>CYP163B19 (2563511989) *Salinispora pacifica* CNY646

VSATDPGRVGQDGGQNLARTVDLADPATFAEHDLTNFWQRLRDEEPIYWN  
PPTDGRRGFWVLSRHADILEVYRDDVTFTSERGNVLVTLLAGGDAGAGRM  
LAVTDGARHAELRKLLLRALGPRVLGPVCSAVRMNTRQMVGEAAASGECD  
FATDIASRIPMITISNLLGVPETDRAFLKLTKTALSADDESISETESEM  
ARSEILLYFQDLVEFRKKPGEDVVSMLVSSSIDGVPLSDDDVVLNCSYL  
IIGGDETSRLTMIDSIYTLAANPEQWMRLKDGQCDDIDKAVDEVLRWASPS  
MHFGRTAVRETVIHGERIRVDDIVTLWHSSGNRDERAFSQPEVFDLGRAP  
NRHISFGHGPHYCIGSYLAKVEISELLMALRDLTLGFEVTGEPQIRSNL  
LTGFSTMPVRFVSA

>CYP1005A8 (2563512671) *Salinispora pacifica* CNY646

VSAVLFRSWTKTAGTHWPAVTRVADQQGTDHLVVTAHALVRQVLTQVQTY  
RPDNAMEAVTPIPVAAALRVLAGHRFRLPPTLANNGGVSHPAIRALVADAL  
HPTKVAAQRPWLTAALVAERVAAIRATLDSGGSADLHADLSADLPLLVLAR  
LVELPDAPISAVKQFARAALFWAPLDADRQLALADEVGRFHQVLRFA  
DTGGGLAAALRAAGHPPDVLVGVLFFLLVAGQETTSQFTLLHRLAGEP  
TVRAALRDGSVSVPHVVEEGLRLEPPIVWRRVAAVDSTLGGTAVPAGTS  
VLLWLARAGRDPAIVPAPDEFPRPGQRGSRRLAFGAGAHRLCLGDQLARME  
AAVVVEQVTPLLDGITVVRAPWYPDNLTFRMPDAFVIRR

>CYP105AB30 (2563512849) *Salinispora pacifica* CNY646

MTETASITTPGTSSTTTTTRAASGELTDAEFFVERGCPFSTPAEYEQIREH  
SPIAKVRLTNGGEAWWIAGHELGRAVLADRRFSSDRRRDNFFVSTDPET



RKQLQDQPTSM LGMDGTEHAQARRALMGEFTVRRMAGLRPRIQQIVNQHI  
DEMLSSDQRTADLVEALSLPVPSLVICELLGVVPYADHDFQAHSGPLVRH  
TTPPEVRVRIQRELNTYL GALIDRKVTDPTDDLLSRQIAKQRAAGTFDRT  
SLVSM AFLLLIAGHETTANMISLGVMGLLQHPDQLAMIKDDPEKTPPAVE  
ELLRYFTIADTVTARVATEDVQLGDTTINAGDGVVVSGLAADHDPTVFVD  
PDRIDLERGARHHVAFGFGPHQCIGQTLARLELQIVFDTLFRRIPTLRLA  
APLDDIPFKSDAIVYGA EKLPVAV

>CYP105AH4 (2563512965) *Salinispora pacifica* CNY646

MTLLQAE EKVLNWPFA RTEWGTPPPILAQLRQAPPCAVIIPAGAASERRA  
WLVTRYPDVRQALMDPRLSADELLPGAPVRIQVPQEERPSSFLRMDDPEH  
GRLRGMIA SQFTARRVRQLVPAVQRRTDELLDAFVAGPCPADLHDAFSRK  
LPTLV IASLLGVPEDESAFFVEKTRVTL SQDDLERSFAAYREMTDYLGQL  
AARKAREPQDDLMSQLAVNNLAVGDITMDELVGIARLVLVAGHETTTNQI  
ALNILSLLLDPLRAQVLADDGRLLPQYVEEAMRYWSISQDAIVRLVTE  
LVLGEVQMRAGDAVVISIPAANHDPTVFPEPDRIDVTRSPRDHLQWNGP  
HYCQGAPLARLEMI IALRTL FARLPGLRLATDDVPSLFRRGTVFHGVENL  
PVTW

>CYP105EJ1 (2563513576) *Salinispora pacifica* CNY646

MTGGNSDLPSFPMARRCPHHPPEYAEMRVRGAAVRVNFLGTPVWAITRH  
AEARDLLTDSRVSTDPASPGHPFGALAATAERMAGQLTMDPPEHSAHRR  
MLISEFGVRRVREMRPAIERSVDDLLDGMAGAAADLVEAYGLPLASAIM  
CQLLGVPERDHAFFHDRACAMLGGVFSSRDADVARMEMLAYLDDLVRGHK  
PGQDGVIDRLLTIRHDTGEP THEAIVGMCFM LLLAGHHTTATMIPLGVHT  
LLDHPDQLAQLRAEPALWPVAVDELLRFHSIVDWMSFDRVAIADIDVGDE  
RIHAGEGIFVLGAAANRDERAFERPDDEFNIHRRSRHHLAFGVGIHQCLGQ  
SLARTELEISYRRLFRFPTIRIQPPAAGLSFKYDAAMFGLQELPVTW

>CYP125A41 (2524763461) *Salinispora arenicola* CNS299

MTEPRIPAGFDFTDPEVL AHRVPREEFAELRR TAPVWWNAQPRGSAGFDD  
DGYWVVTRYADVMTVSRSDTYSTRENTAIARLRPDTTREDIEMQRVIML  
NVDPPEHTKLRAIVSRGFTPRAINALRGSLAERAHIVRDAAVRGVGD FV  
TDVACELPLQAI AELIGVPQHHRKVF DWSNQLIGYDDPAYGTDPLTASA  
ELLYAMEMAERQRSPSDDLVT KLVNAQIDGEHLTTDEF GFFVMLLAVA  
GNETTRNAITHGMVAFLDNPEQWELFKAERP KSAVEEII RWATPVNVFQR  
TALVDTVLGGQAI SAGQ RVALFYGSANFDEAVFEDPERFDITRSPNPHLG  
FGGSGAHFCLGANLARLEIELIFNSIADHLPDIRKVAAPQRLRSGWINGI  
RQMPVRYR

>CYP211C1 (2524763610) *Salinispora arenicola* CNS299

VVDVEELLTRLYSAQGRQDPFPVYADLHAQGPIAALPPEPERRRVA AVAV  
GYDLVGAVLRDPEWSKAPPPGWTEQEILRTLQTSMMFINPPDHGRMRHVF  
AGTFTPRRLGALEPVVNRVADELLDRMADAGAGGLDFVAEFAYPLPARVM  
AEFIGIPETELDWYRERVDVIDAFLDVAGKTPQRLAAANAAGAE LRAFYG  
ELLARRRRTPGEDLISGLVEAVDAGGVELTEDELVS NLIVLFNASFVTTV  
YMLSNGLPVLLAHPEVAAALATDPVLTAGAVDEILRLQAPVHLLARAAPR  
DTVLGGVPI PQGQNVLLLI AAANRDP AHFPDPDRFDPWRS GPPSLAFGLG  
LHYCLGAAVSRLEGR LALPRLLSRFPRLRIMEQPVYSGSLFLRGIDKLSV  
SPGEGSTRE

>CYP208A12 (2524764303) *Salinispora arenicola* CNS299

MTLDTITPRVPLGPPRTAALRMLLVMKRDRLGMLTSAAARYGDASRLPVG  
HKALWFFNHPRYAKHVVLADNSANYHKGIGLVHARRALGDGLLTSEGLDWR  
KQRKVIQPAFQSRRIAQQAGMIAEEAFALVERLRARAGAGPVELTAEITG  
LTLGVLGRSLLDADLAGFDSIGDSFATVQDQAMFELETINAVPMWIPLPR  
QIRFRRARRKLQAVVDTLVDGRAGNLADRVDVLSRLILSARGEADPRVGR  
ERLRDELVTLLLAGHETTASTLGWTLSLIDRHPGVWERLHAEAVEVLGDR  
LPEYDDLRLRLRYTVMVVEEAMRLFPPVWLLPRRALAPDTIGEYRVPANAD  
VVISPYTLHRHPEFWPNPERFDPERFAPGQAADRPRYAYLPFGAGPRFCV  
GNNLGMMEAVFVIALLCRHLRLTGVPGYRLVPEPMLSLRIRGGGLPLVVRP  
VS

>CYP1005A1 (2524764527) *Salinispora arenicola* CNS299

VSAVLFRSWTKTAGTRWPDVTRVADQSGTEHLVVTRHALVRQVLTQATY  
RPDNAMEAVTPVPVAALRVLAGHRFRLPPTLANNGGVSHPAIRALVADAL  
HPTKVAQAQRPWLTGLVADRVASIRTTLDSGGPVDLYADLTADLPLLVLAR  
LVELPDAPVNAVQKFARAALELFWAPLDADRQLALADEVGRFHQVLRFA  
DTGGGLAAALRATGHSPDVLVGALFFLLVAGQETTSQFLTLLHRLSGEP  
TIRAALRAGSISVADVVEEGLRLEPPIVTWRRVAAVDSTLGGTTVAAGTS  
VLLWLARAGRDPVVAAPDEFPRPGQRGSRRHLAFGAGAHRCCLGDQLARME  
AAVVVEQATPLLDGVTVVRPPWYPDNLTFRMPDAFVVR

>CYP105W2 (2524765081) *Salinispora arenicola* CNS299

MTGYQDRPTGDQPGAPVPSGSTDPGIGAFPLPRRCFFSPPAEYARLRAEH  
PVVRLPMLGGDTAWVVSRRHADVRQVLSDPMSADRRRPGFPKFAPTEGQ  
RQASFANFRPPLNWLDPPEHAICRRQIVDEFVRRVRQSRALVERVVDTH  
LDALTAAPGADLVSTFAYPVPSQVICEVLGVYPYGEHEFFERRSTLMFRR  
STPADERARCAREIRDFLDMMVTDKERRPGDDVLSRLLYRQRSAGGMDHE  
AVVSMFVLLVAGHVTTSNMLALSVLALLTHPARLARLRAEPPERFPAAVE  
ELLRYFTVVEAATARTTTAEVTIGGVTTAAGEGVVALGQAANRDPRVFEH  
PDEFDPDRDARAHAFGHGRHICPGQHLARLEMEVALSRLFRRLPGLRLT  
MEVSDLPLKEDSNIFGLYALPVAW

>CYP248A2 (2524765089) *Salinispora arenicola* CNS299

VLADAVTAFDPTAVDVRRDPYPSYHWLLRHDPVHRGAHQVWYVSRAFADVR  
AVLGDERFARTGIRRFWTDLVGPGLLSQIVGDIILFQDEPDHGRRLRGVVG  
PAFSPSALRRLEPTIEATVNDLLRPARALGAMDVVADLAYPLALRAVLEL  
LGLPAGDANAVGRWSRAVGRTLDRGATAEDMRRGHAAIAEFADYVERALA  
ERREDGADLLALMLAAHRSQMLSRNEIVSTVVTFTFTGHETVASQLGNGL  
LSLLDHPEQMELMRQPHLVPPQAVEECLRFDPVQSNTRQLAADVELHGR  
RLRRDDVVVVLAGAANRDPGRYDRPDELDIRRDPVPSMSFGAGMRYCLGS  
YLARLQLRTALGAMVALPDLRLVCSPNELAYQPRMTMFRGLTRLPVAFTPA  
G

>CYP107FS2 (2524765151) *Salinispora arenicola* CNS299

MPVPQGEQNLTTTEVFADPKALFATLGSRQPLHRISLPDGMFAVLVTGNRE  
ARQALSDPRLVRSITAAAPELHKYHPLASDDYALSRHMLFADPPDHGRMR  
KLVSTAFTRRRVEQMRPRIQQITDDLIDVIAAKGEADLVETLALPLPIAV  
ISEMLGVFPFADRSEFERHAEVLTGINASSGFDAIIAAGRWFDEYLAELVQ  
QRRREPQDDLISGMLAAQDKGDRLTDVELRSNALLLSAGFETTNNLVAN  
GLLALLRHPEAMAALRSEPNLMTTAVDELRLRYDSPVSCVTYHFAQEPVEI  
GGFEIRSGEHVVIAAAAANHDPTVFADPSRLDLRREGSGQILSFSGIHF  
CLGAPLARLEGEIAFGTVLRLLAGLRLAVPTDSLWKASFVLHRLRLPV  
TFTPDRAPNPIDSVHTV

>CYP105CN1 (2524765152) *Salinispora arenicola* CNS299

MAAPAPQATQSTTPHPPSYPLPRECPYRPSAGTARLRDAGPVSTVRLYDG  
RTAWLVTGAAEARALLADSRVSNRADFPNYPVMDERHLSMRATREMAREE  
EGGFAAALFGMDPPEHTRQRQLLLPRFTVRQVAARRPAIQRIVDEHLDAM  
EANGSPADLVSAFATPVPTMVVCTHLGVVPYQDRTRFEPVAVAGLFEPDRAD  
AAMAELTAYLHQLIETKQSEPGDGVIDHLIANHLRPGAIDRAELVAVASA  
ILVAGTVTTSSAIALGTLALLTAPGQYAALVDNPDLPVPGAVNEILRYLSL  
VEQLARVATEDIEIGGKLIRAGDGIIVSFAAGNLDPNVTTTHPDRLDVALP  
PTNHAFSHGIIHHCIGQNLALLELDIAFRALVSRFPTLRLAVPAEQLPITY  
FAGDVPRLACLPTW

>CYP105CP2 (2524765154) *Salinispora arenicola* CNS299

MTKSMPVQDLPAFFIPRECPYRPSAQHVSLRSGGPMKVRLYNGRTAWLV  
TDSAHARAVLSDYRRVSIKPYHGNYPILLNEEFKVVDSGYADVLFGVDPP  
EHTRQRQMIMPSFTLRRTAVLRPDIQRIVDDKLDMMRHGAPGDLVTEFA  
QPVPSPMVSFLLGVPWDHEEFETPAHKLFVPELAEAEATTELGAYLERLI  
QKKEQPGGTPGGTGLLDDLIRDHLRAGALSDELVHIAMAMLVAGTDTT  
NVISLGTALLDNPDQWAALRDNPDDELIPGAVEEILRYTSLIEAFARVAV  
SDIELNGAVIKEGEGILISSAGVNFDPALAPDPGRFDIRRPPRPSFSFSH  
GIHRCPGDNLARLELEIAFRSLVTRMPNLRKAPIDQIPSNNDGTLQRL  
YELPVVW

>CYP244A4 (2524765615) *Salinispora arenicola* CNS299

MSTTTNTELTEAPETNMPVDPLGDFDCMPDLIAAARVAPVVRIPYLGRHAW  
VVCDELVKQALTHPKMGKDIALVPEWMRQPGMLVTAQPDPEYARAMIMS  
DGENHARIRRIHAPVLSRPNTERWGERVADKVEGFLDELSQAGSGGSAEV  
NVVTNYTHKIPLAFISEMLGLPPEAEHRLRGITDIMLYSSDYAARREAIG  
GLFGAVEDWVRNPADLRDGVITGLLAASDGPDAAVTEGEVIVWTLGMIIT  
GYETTGSLISTSLYEAIRPPHERPKTDEDITAWIEETLRVHPPFPHTW  
RFPLEDIELGGYLIPKGAPVQVSIAAANRKPGEGADSFDAERRGHGHLSE  
GLGMHYCIGAPLVRLEAQIAVRGFLRRFPQARLSAETAVQWESEWMIRRM  
SVLPVLS

>CYP245A7 (2524765619) *Salinispora arenicola* CNS299

MPSATLPRFALTGWSRENIVNPYPVYQRYREVASVHRGEPGGDAPDTFYV  
FSYDEVVQVLSSNCFGRGRSLDAAKASVPVPAEQKALRAIVENWLVMFMDP  
PRHTDLRSLNRSFSPRIVTELPRPRIARIAQELLSRLGQQVDVDLVESFA  
APLPILVISELLGIPEERRAWLRANALALQEASSSRAGRDVDGYARAEVA  
AQEFTEYFREQVRLRRGRAGGDLITILANALERGAPVSLDAIVGTCVHLL  
TAGHETTTNSLAKAVLALREHPTVLDELGAEGLTDAVEEFLRYDPPVQ  
AVTRWAHQDITLGGCDIPGRSRVALLGSANRDPARFSPDVLVRRPAD  
RHLSFGLGIHYCLGATLARAELEIGLQALLDGVPTLGYGTQHVDYADDLV  
FHGPSRLVLVNLGERCK

>CYP166A4 (2524765701) *Salinispora arenicola* CNS299

MTDAISFELPWARTDKFDPPAVFDALREQRPLARMRYPDGHVGWIVSSYE  
LVREVLGDPRFSHSCAVGHFPVTHQGQVIPTHPQIPGMFIHMDPPEHTRY  
RRLLTGEFTVRRTSRLTGHEGVATEQIEVMREHGAPADLVATFARPLVL

RVLSSGLVGLPYGERDRYLHAVTLLHDAEADPAEAAAAAYEQAGAYFDEVIE  
RRRRQPEDDLISTLVGDGELTGEELRNIVTLLLFAGYETTESALAVGMFA  
LLHHEDQLARLRADPTKIDAAIEELLRYLTVNQYHTYRTASEDIELHGEV  
INKGDSVTVSLPAANRDPARFACPAELDIDRETSGHVAFGFGIHQCLGQN  
LARVELRAGLSALLRAFPNRLRLAVPADEVPLRLQGSVFAVKNLPVCW

>CYP211B2 (2524766122) *Salinispora arenicola* CNS299

MDVSEAI AVLISPSGRLDPYPTYEQ LRAHG PVSRTTAGL FVVVTGYAEADM  
VLRDPRFVVLDDDLRDDVFPHWQDSPAIXIARSMLRTNPPDHSRIRRLA  
AGAFTPRRVAAMREVVTAQADELVDEMIRAGRDGARVDFMDMFAYPLPVA  
VICALLGVPAADRSRFRWAGDLTGILEPEITPEELAGADAGADELRDYF  
TGLIEQRRRAPADDLTALVQAHDADGDRLSGEELLANLVLLVAGFETT  
TNLLGNGLVLLTRPEAAAAALRDEPD LAPGYVDELLRYDSPVQLTTRTVR  
ESVSFAGTELPADSWLLVLLGAANRDPRRFPDPARFDPWRAQSQPLSFGA  
GPHYCLGAGLARLEAQVAFPLLLRRLPELALAGRPSRRTRLTLRGYETLP  
ITVGAVTADRGT PAGVAPGTP

>CYP1051A1 (2524766534) *Salinispora arenicola* CNS299

MATDAAITRARTVPAWKALPAAVRDTHRAFVDVGNWSDGDVVRVSLGVSR  
PYLVTNPAHVQEV LHERAAIYPRGDDTALWRSVRKLVGDGILAEGDAWAA  
SRRVLAPMFRPARINAMVDTMADA IAGAFDDLHGAATAGTPIDVGRELSR  
IVCSAIMRVFFADRITVRDALRIMKAQETIVTAMAPRILAPLVPWWIPMP  
GDRRFRAAVRSID DILLPVL RQAQRQPDDGDDL SRLVRARADDGRALSE  
KMRDDLVSMVAVTTETSTVVL TWLWPLL ANHPDVANRLYDEIDRVVGGG  
PVRGDHLAELTYTRMVLDELLRLYPAGWILPRRAATT DVLGGVRINKGAT  
VILSPYVTQRM TAWWGPTAEAFDPERFAAGREAADGRHRYAYYPFGVGMH  
RCLGEHLFNLEAILIVATLLSRFRFALTDTSMPGVKVAASTRPARTVEMI  
LKPVAPVPAR

>CYP105G5 (2524766558) *Salinispora arenicola* CNS299

LTIETTETTPADDSLAPLPRQFMQRDDPSKLPALAAALAEQSPVGRSTL  
PDGDPFWMVSGYDEARAVLSDPRFSSDRFRYHPRFKKLSGQLGERLRNDK  
ARAGSFINMDPPEHTRYRKLLTGQFTVRRMRQLTVRIEQIVTEQVDVMLA  
EGNSADLVSAFAVPVPSLMICELLGVRYEDRTEFQRRRAAGLLQTDLP IKQ  
AVENLEAQRAFMRQLVTDKRRTPADDMISGLVHHAGAEPPLTDDELVGIA  
TLLLFAGLDTTASMLGLGMFMLLQRP EQMAVLRDDPSRIGDAVEELLRYL  
TVVSTGLFRFAKEDVVLGDEHIPAGSTVVVSLMAANRDGRHWPEPETLDV  
TRVRSSHLAFGHGVHQCLGQQ LARIELTVGITELLRRLPNVRLAVPPADV  
PLRNDMITYGVHRLPILWDTL

>CYP107Q4 (2524766559) *Salinispora arenicola* CNS299

MTTTAETS AETIDLFSPEVVADPFGWYARLREETGPTTGTLNIGTMMGGP  
EMWLVTTRYEDVRQVLTDPRFLTNPADSPLEDIRAGVFKRLDFPPDLIPW  
MANLLNVSDGEDHTRLRKLVS YALTAHRIGKLRPRVEKITADLLDKLAED  
GKDGSPVDLVEEYCYPLPVTVICELVGIDEPRPHWRAWGDSMATMNGER  
IPTTLVKCIELARELIAKRRAPQDDLV TALVQAQAEQNRVSDDEIIGI  
LFSLVTAGHQTTTYLIGNSVILLLENPDQLARLKENPSMWPQAVRELQRL  
GPIQFAQPRFPSEDIELGGVTIPRGAPVAPLLLAANTDPRRFPDPNKLII  
DRLAVGSEHGLGFGKGIHRCLGQHLAYQEA E VALQGLFTRFPDLSLAVPR  
EEIPWILRPGFTTRRTLPLKLV

>CYP105CT1 (2524766582) *Salinispora arenicola* CNS299

MNSPNHMPADRSLTAPTSGCPMALSRGRVGLDVADEISELRDGGRLGRIT  
TAFGQEATLITRYDEVRAQMADSVVFNVAGVPSPPALVDGGFDTESVRRR  
RTVGNLIMLDPPEHTRLRRMVAAWFTTRRVERLRPRVVEIIDAALDEMER  
SGPPVDLVAMFAKTVPITVICELIGVPEELRERYRRRAERAVSASAVSTP  
LDELRLREAGWVSRELIEYHRENPSDDIIGMLLREHGTDSDHDDGITDDE  
LVGLANALLIAGHETTTQMLSMGTLALLRHPDQLALLRDDPSIVAGAVEE  
LLRYVGV LHGGFVRVATRDTRLGGHRIHAGELVVPALTAANRDPRLTLDG  
DRLDITRPPTSHVAFGHGVHFCIGAPLARMELREAFPALLRRFPGLRLAV  
PDSELEFTQGTTVYSLRGLPVTW

>CYP154M5 (2524766599) *Salinispora arenicola* CNS299

VEQSCPYKLDVTGRDVHAEGEAI RARGPVAQVELPGGVQGSVTGYQAAR  
QVLADPRFAKDPKKWPAYTSGAIPPNWPLIGWLLMDNMTNDGADHQRLR  
KLVSHGFTPRQVERTRPLIVKIVNDLLDGLSSAGPDEVVDLKGRFATPLP  
ARVICDMFGVPEALRASVLRGAQVNVTSISGEEAEANVEQWHRELLELV  
EAKREKPEDMASLLIAAKEEDGSTLTQEEVVGTLHMLGAGSETLMNAL  
SYAVLGMLSNPGQYEMVRNGTSSWDDVIEETLRAQAPVAQLPLRYATEDV  
AVGGAVIKAGDPVLMGFTAIGRDP AVHGETAGDYDITREDKTHLSFGHGV  
HFCLGAPLARLELKIALPALFERFPNMTLAVRPDQLEPQGT FIMNGHREL  
PVR LGQPATVLA

>CYP105AB8 (2524767302) *Salinispora arenicola* CNS299

MTETASSRLTDTEFPVQRECPFAEPVEYEQIREQSSIAMVRLTGGGEAWW  
ISGHEQGRAVLADRRFSSDRKANFPFVSTDPAIRKRLHAQPLSLISMDG  
AEHTQARRALIGEFTVRRLAALRPRIQQIVDQCIDEMLTDDQHRADLVKT  
LSLPVPSLVICELLGV PYADHDFEQEHTATLVRRNTASEVRQHSIDELNA  
YLGALIDRKLASPDLLGRQIARQHRDGT FDRSSMVSLAFLLLVAGHET  
TANMISLGVVGLLQHPEQLAMIKDDPKTPLAIEELLRFFTIVDSVTSRV  
ATEDVRFGDTTINAGDGVVVSGLSADWDPTVFADPDRLDLERGARHHLAF  
GFGPHQCLGQNLARLELQIVFDTLFHRIPTLRLAAPLDKIPFKTDAAIYG  
ARELPVAW

>CYP105BL2 (2524767401) *Salinispora arenicola* CNS299

MSSHSAAAPDPETATPLHTLAPELTFPQFERSTPFDPPQAYTELSGRCPV  
APVSMADGKPSWLITSFEGVRTTSLSDPRFSSDM SHPGFPNRTGKPVDDL  
KDTLGAMDGERHRYRRLTGELTVRRAKAMRPVITQITDEALDQLAAAG  
PGADLVKHVAFVVP SRVACHLVGIPLSDYELFTGMAATLMDSTSSDDQFA  
ALQNMVSYFDTLVTDREHHRDDLGHMVRRYLATGELTRDMLIRLAWTT  
MAAGQETTAHMI GLGVAALLRHPDQLELLRREPHLLPGAVDELMRYLPLI  
QFGIPRVAMDDVEVDGQTVTAGEGVVALPPLANRDP AVFERPDEL DVRRN  
ARQHLTFGYGPHQCPAHALARLELEVYGRLLERFPTLRLADSDADLKVQ  
DKDIMYRVSELAVTW

>CYP247A7 (2524767451) *Salinispora arenicola* CNS299

VRLTPGAARDIDLDSVNLFDLDLYTSGDPHP IWDVMRAQSPLHHQVLADG  
REFWSVTRYDDVCRVLGDYREFTSERGT VVTHLGEDDIAAGKLLTSTDPP  
RHTQVRRRAIGAKLTARAVASWQDRIRDAIVRFLEPALDGDTFDLAEQALL  
LPAIVTGPLLGI PERDWQELVQLTAMVTAPSDPHFQHGSEATLAISHHE  
LVTYVTEWVKQRRSAGGGDGSLLDHLMSVRVGGAPLTDEEIALDGYSILL  
GANVTTPTVSGTVLALIERPEQFEKAQADPSLLANLVEEGLRWASAACN  
FMRYAVNDTRIGGGTV PAGGAVVAWIGSANRDESYFPDPHQFDITRSGAN  
RQVAFGFGPHYCIGAPLARMTLGIFFEELVQRFSGIELAGEPQHLSYFI

AGMTHLP IVAQKRKTP

>CYP105CH1 (2524767636) *Salinispora arenicola* CNS299

VSSLPLPTYPKLRDPADPLLPPAEYLAIQSEKPIAKVLLPSGRPTWLITG  
HALARQVLTEPCVSVDRRHFNFPYPVPNPDAVVAQVARWTYILLGDDPPL  
HTERRLLISEFTVRQAQAMRPRIQQLVDFHLEQLIAAGPGADFSKHFAM  
KVPSAVICEMLGVPFADHDYFQERTALQLRRDVPVAAQKQAIDELLAYFE  
QLIQEKSSHPGDDVLSRLIVSNRETEAFDHEALVALGLLLLLVGGHETTAN  
TLTLATATMLERPEIAEQLRDPSLMPSAVEEFLRYFSVAVAVSRIATAD  
LQVGGQLVRAGESMLLVLNTIARDGTVFPEPHRLDIRRNARNHLAFSHGI  
HQCMGQNLARVEMQIALDTVLRRLPGLHLVTPFEELPFKYRHLVWGIEEL  
RVAW

>CYP105J3 (2524768166) *Salinispora arenicola* CNS299

MTDSVAFPQGRVCPHQAPAGYRPLAVQRPLAQVTLYDGRRVWAVTTRDLA  
RRLLVDPRISSDRTNPAWPAIVPIVAAVNDAAQKVLKIATALVGTGPE  
HKAQRKMLIPSFTEFRMNALRPMIQEIVDQQLDEMIKSGAPTDLIPAFAS  
AVPVTVLYRLMGIPDDDHGIFEKLSHQLLAGPNANEAYDQLMGYMSRLIA  
ERRRNPGEGLVDDLLAQHGANDDADHDELVSTLVVQVAGNHGTTGSMIAL  
GLFALLQHPEQLAELRADPSLMPTAVDELLRFLSVPDAVTRLAADDIEVE  
GTIIRKGDGVFFITSLINRDTDVHDAPNSLGWHHASAADHLTFGFGAHQC  
LGQSLARITMEIALGALIDRLPSLRLAVPAEEVPFLPAASLQVIAELPIT  
W

>CYP107EU1 (2524768228) *Salinispora arenicola* CNS299

VTIGQTLPLDVYSPEFTRDPYAI FARLREQAPVCRVTTHRGMSAWMVTRH  
ADVRALLADNRLAKDGNRIGELMPRHSTLTGAATGFPPGLTNNMVNSDPP  
DHTRLRHLVGREFTGHRVEGLRPRIEEIVDDLLDGVAACGDEADLAETLA  
RRLPIAVIGELLGVPEADRAEFFRWADTLYGGTASPEALGQAYNAIVDYL  
GRLCDAKRDPADDLLTALVQVSADEDRLSREELVSMALLLLVAGHETTS  
KQISNGVLALLLNPEQLKLLKAQPARTAGAVEELLRFEGPSLSASLRFTT  
EPVEVAGVVIPEGEFVLLSLASGNRDPEKFPDPDRDLITRSTQGNLAMGH  
GIHHCVGAALARLELEIVLSRLVARFPQMQLAVEADDLEWLVNSFFRAPL  
HLPVSLRR

>CYP1198B1 (2524768447) *Salinispora arenicola* CNS299

MSGELTDQRTAPGAGGNPLRSLMDHGIRANPYPLFGELREAGPTAVEDGS  
VVLFGHEYEHCSQILRHRDMGSDTSEAPSIKGFVVDDAERAGSSIFFMDQP  
GHGRQRKLVSKSFTPRIVKSFGPQITHIVDGLFEDFRDKGELDVVTDLAY  
PVSIGIICDLFGIPDDERDMLKEWSDDLALSTELPTLGAAIGVLNVFTRD  
EINRFGSVAMAAHAYFADLIHRRRKNPGDDLVSLLATESNGERLTRFEV  
TSVLATLFVAAHESTTNLISGGILALLRNQDQMAVLRENPGELITNVVDES  
LRYDPPVHLAARMARARTTIGGYDLDPGTIVVVLMAAGNRDPRAYESPDV  
FDVNRKIRNVSLAFGAGAHFCIGSGLAKLEAEIAISAFQRLKNPEVDES  
SLEYRRHIVVRGLEHMKVSFQP

>CYP211B14 (2563520052) *Salinispora pacifica* CNY673

MDASEAVALLMSPPGRLDPYPTYERLRAHGPPVPTAAGFFVVTGYTEADA  
VLRNPRFGVMDDEERDGVFFHWQDSPAMMSISQSMIRANPPDHSRMRRLA  
AGVFTPRRVAALREVVAQADELIDEMIRAGRGGAPVDFLGSFAYPLPVT

VICALLGVPAADWAQFRRWASDLTGVLEPEITPQELAIADAGATELRDYF  
TELIAQRRRDPTDDLTALVQTHDADGDRLSGEELLANLVLLLVAGFETT  
TNLLGNGLFVLLTHPESATALRDQPELAPGYVDELLRYDSPVQLTTRTVR  
ESVPLAGVELPAGSWLLVLLGAANRDPARFTDPARFDPGRAQSPPLSFGA  
GAHYCLGAGLARLEAQVAFPLLLRRLPELALAGEPIRRNRLTLRGYETLP  
VTVGAVAVDHGTPAGAALGTP

>CYP244A5 (2563520364) *Salinispora pacifica* CNY673

MSATTNAELGEAPETDMPVDPGLFDCMPDLIAAARIAPVVRIPYLGRHAW  
VVCDELVKQALTHPKMGKDITLVPEWMRQPGLMVTAQPPPEYARAMIMS  
DGENHARIRRIHAPVLSRNTERWGEQVAAKVEGFDELDELAKAAAGSNAEV  
DVVTNYTHKIPLAFISEMLGLPPAAEHRLRSITDIMLYSSDYAARREAIG  
GLFGAVEEWVRNPDGLRDGVITGLLAGSDGPAAVTEGEVIVWTLGMIIT  
GYETTGSLISTSLYEALRRPPHERPRTDEDITAWIEETLRVHPPFPHTW  
RFPLEDIELGGYLIPKGAPVQVSIAAANRQPGEGADSFDTERRGHGHLSE  
GLGMHYCIGAPLVRLEAKIAVRGFLRRFPQARLSADTAVQWESEWMIRRM  
SFLPAVLS

>CYP244A5 (2563520368) *Salinispora pacifica* CNY673

MTSTTLPRFTLTGWNREDIVNPYPVYRRYREVAAVHRGEAGGDAPETFYV  
FSYDQVAQVLSSSCFGRGRSLDATAASVPVPADQKALRAVVENWLVFMDP  
PRHTELRSLLNRSFSPRIVTGLRPRIARIAQELLSRLGRQVETDLVEGFA  
APLPILVIAELLGIPAERHGWLRNLTALALQEASSSRARRDTAGYARAEAA  
AQEFTEYFREQVRLRRGSAGDDLLTILANAQLRGAPVSLDAVVGTVHLL  
TAGHETTTNSLAKAVLALQAHPAVLEELRGADGLTADSIEELLRYDPPVQ  
AVTRWTHQDRTLGGWEVPRGSRVVALLG SANRDPARFPLPDALDVHRPAD  
RQLGFGGLGIHYCLGATLARAELEIGLQTLKGLPTLGYPAYVDYADDMV  
FHGPSRLILVNPGERFCQ

>CYP107AW6 (2563521076) *Salinispora pacifica* CNY673

VETVTGTSAPLPVPYIADPYPTLARIRANGPVSIHSDGVPMMVVIARYR  
EVRAALADPRFGQDARRAQALADNRVAGVTLGGDIVHMLNSDPPDHTRLR  
RHVQGAFTARRVAAMRPLVERITTSLLDGLAGRKTVDLVQDLAFPLPMLV  
ICELLGFPAEERNAYRSWSTAILTHDDDPAVFATALREMTDYIAVQLRIR  
RSRPGDDLLTELLAARDAGQLTDDEIVGMVFLLLIGGHETTVNLLGTATL  
ALLRNPDQHRWLLANRHALPEAIDEFLRYESPVAMATLRFTTTPVTVDDV  
VIPAGELVLVSLGGANRDPDRFPDADRLILDRRDTGHAFGHGLHRCLGA  
FLGKLEGEVALGALLRRHPKLALATEVRQLQWRDTIMLRGLESPLVSLHG

>CYP107AX9 (2563521091) *Salinispora pacifica* CNY673

VTAQPAPVFDQRLLRDPHRRYNALRDQAPVHRVRTPDGAPAWLVTRYDDV  
RAAFTDPRLSVDKRFSGTDGEHGSSLPPELDAHLLNRDPPDHTRLRLRLAA  
AAFTPRRVADLRPAVEKTVSTLLDGLAGNDHAELIDSLASPLPLQVMHEL  
LGLPTQTSVDFRTWTNTLLSADANQPAQSR SAMANMRRFLIEQVAHKRAQ  
PGDDLLTGLLCVREDDDGLTDDELVAMLFLLMFAGYDNTAALIGNVIHAL  
LTNVELAEAVRTGSLAVDELVDGVLRWNP SFPLAVRRFAREPITIAGQTI  
PAGDRIWLCLASANRDP AHFTEPDEIGIADMRRPHLSFGHGIHYCLGAPL  
ARLQTTVAVASLDFRFP GIRLAVPVQDIQWRESFRLRGLVALPVSL

>CYP208A21 (2563521102) *Salinispora pacifica* CNY673

MTTTSIERRRPPGPPRAAALSMLLTMSRDRLGMMTAAARAYGDAAWLPVG  
HKALYFFNHPDYAKHVLTDNSDNYTKGIGLVHARRALGDGLLTSEGELWR

EQRRVIRPSFRSGRAPDQASVIAEEVASLVERLRARAGGPPVNVVTEFTG  
LTLGVLGRITLLDVDLTALATVGDFAAQQDQAMFELVTL SAVPTWIPLTR  
QRRFRRARAELEIRIVDDLVARRGDVSGRDDVLSRLILSTGAEPDARVRRQ  
RLRDELVTLLLAGHETTASTLGWTLYLIDRHPPVRELRRAEAAEVLGDRL  
PAYRDLPLDRFTTMVVQEAMRLYPPVWLLPRRSRRADRVGPYVWPAGSDV  
VVSPYTMHRHPGFWEPEPDRFDPLRFDPRNAADRPRYAYLPFGAGPRVCVG  
SNLGMTEAVIAVAMLCRELRLVRVPTHAAVPEPMLSLRIRGGLPMSVHLA  
D

>CYP125A66 (2563521519) *Salinispora pacifica* CNY673

MTEPRIPVGFDFDTPAVLERRVPREEFAELRRTAPVWWNAQPKGSAGFDD  
DGYWVVTRYADVMASRDSETYSTRENTAIARFQPGTTQADREMQRVIMI  
NVDPPEHTKLRAIVSRGFTPRAINALRGSLGERAERIVRDAAGRAGAGDFV  
TDVACELPLQAI AELIGVPQHRRKVFDWSNQLIGYDDPAYGVDPLAASA  
ELLAYAMEMAHERQRNPSDDLVTKL VNAQIDGEHLTADEF GFFVMLLAVA  
GNETTRNAITHGMLAFLENPEQWELFKAERPRSAVEEII RWATPVNVFQR  
TALVDTTLAGQAI SAGQRVALFYGSANFDES VFEEPERFDITRSPNPHLG  
FGGSGVHFCLGANLARLEIELIFNSIADHMPDIRKVADPQRLRSGWINGI  
REL PVQYH

>CYP105BL6 (2563521582) *Salinispora pacifica* CNY673

MSSHFAAAPGPETATPLHTLAPELTFPQFERATPFDPPEAYTELSGRCPV  
APVRMADGKPSWLITSFEGVRAALSDPRLSSDMSHPGFNRTGKPVDDL  
KDTLGAMDGERHRYRRMLTGELTVRRAKAMRPVITQITDEALDQLAAAG  
PGADLVKHVALVPPSRVACHLVGIPLSDYELFTGMAAKLMEATSSADQIA  
ALQDMVSYFDKLVTDREHHRDDLLGHMVRRYLSTGELTREMLIRLAWTT  
MAAGQETTAHMI GLGVAALLRHPDQLELLRREPHLMPGAVDELMRYLPMI  
QFGIPRVAMDDVEVDGQTVTAGEGVVALPPLANRDPVFERPDELDVRRN  
ARQHLSFGYGP HQCPAHALARLELEVVSRLLERFPTLRLADGDADLKVQ  
DEDIMYNVSELAVAW

>CYP107AY7 (2563521738) *Salinispora pacifica* CNY673

MRAEPAPI PRSGARLGQEYDQLRKTDGVHQVLLPDTSLAWLVTSTELVSR  
ALADPRLALNRKHSRGWSGFALPPALDANLLNLDAPDHTRLRLRVGPAF  
SPQRVAALRPRIERTAEELVDTLVATGSPVDLVTGYCTPLSVQVIADLLG  
VPEARRTDLRAWTDMLTSYPPDRDAIRQAVVELHGYVVNLIEAKRQRP  
DDL SALVATEQEGDRLTRDELTS LAFLILFAGYENTANLIAS TVLRLLG  
HGS LRGARASEAIEETLRLEPPAPAAIRRFPIEEMTIGGATIPAGDTVLL  
SIAAATRGTDCNSARLAFGNPHFCLGAALARVEAEEAITVLARRLPSLA  
LAAPGAPVRWRPTFRTTHGPAELLVTW

>CYP211C6 (2563521776) *Salinispora pacifica* CNY673

VPDIEGLLARLYSAQGRQDPYPVYADLHAQAAIATLEPRPERQRVA AVAV  
GYDLVA AVL RDPEWFKQPPPGWRDQEILRILQSSMMFINPPDHGRMRHVF  
AGTFTPRRLGALEPVINRVTD ELLDRMADAGPGEVDFVAEFAYPLPARVM  
AEFIGIPATELAWYRERVDRVDAFLDVAGKTPERLAAANAAGAE LRSFYR  
ELLAHRRRTPGDDLISGLVEAVDAGGVELTEDELISNLVVLFNASFVTTV  
YLLSNGLPVLLAHPEVAAALASSPELAAGAVDEILRLQTPVHLLARAAPR  
DTV LGGVSIPQGNVLLLI AAAANRDP AHFPDPDRFDPRRSGPPSLAFGLG  
LHYCLGA AVSRLEGR LALPRLLSRFPRLRILEQPVYSGSLFLRGIDKLSV  
SPGGREHP



>CYP154M16 (2563522687) *Salinispora pacifica* CNY673

MPDRCPVLDPSPGRDIHAEADRLRAQAPAVKVELPGGVHAWSITSYDVVRR  
LLLDRNVTKNARNHWPKFINDIIPPDWEMISWVAMDNMVTAYGKHLVRLR  
RLIAKAFTVQRVETVRPQVEKLVDELDDGLAAETGEVVDLREKFCYPLPA  
LLIADLIGMTEQQRAQTAKAMDLMVDTTVSPEQAQAILTGWRTAMDELIA  
AKRREPFGKDIASDLIAARDDENGGLTDSELTDTIFAILGAGSETTINFL  
DNAVTALVTHPGQLELVRSGRAGWDDVIDEVLRVQCPLASLPLRYAVTDI  
ELDGVTIPQGDPIILINAAAAGRDPALHGDGTAGEFDVTRENKEHVSFGHGP  
HYCLGAGIARLVATIGLSRLEFRFPDLRLAVPAEELQPLPTFIMNGHRAL  
PIRLVPAPAAATAV

>CYP1005A8 (2563522723) *Salinispora pacifica* CNY673

VSAVLFRSWTKTAGPHWPAVTRVADQQGTEHLVVTEHELVRQVLTQVITY  
RPDNALDAVTPIPVPALRVLAGHGFRLLPPTLANNGGVSHPAIRALVADAL  
HPAKVAAQRPWLTKLVAERVAAIGATLDSGGSADLHAELSADLPLLVLAR  
LVELPDAPVSAVKQFARAALFWAPLDADRQLALADEVGRFHQVLRFA  
DTGGGLAAALRTTGHPDVLVGALFFLLVAGQETTSQFLTLHRLAGEP  
TVRAALRDGGVSVANVVEEGLRLEPPIVWRRVAAVDSTLGGTAVPAGTS  
VLLWLARAGRDPAIVPAPNEFRPGQRGSRRLAFGAGAHRCCLGDQLARME  
AAVVVEQAAPLLDGISVVRAPWYPDNLTFRMPDAFVIRR

>CYP105AB34 (2563523864) *Salinispora pacifica* CNY673

MTETASITTPGTSSSTATSGPGSGEVTDTTEFPVERGCPFSTPAEYEQIREH  
SPLTKVRLTTGREAWWIAGHELARAVLADRRFSSDRRRDNFPFVSTDPE  
RKQLQDQPTSMGLMDGAHAQTRRALMGEFTVRRMAGLRPRIQQIVDQHI  
DEMLSSEQRSADLVEALSPLVPVSLVICELLGVPYADHDFQARSGPLVRH  
HTPSKVRVRIQEELNTYLGGGLIDRKVADPTDDLLSRQIAKQHAAGTFDRT  
SLVSMALLLIAGHETTANMISLGVVGLLQHPDQLAMIKNDPEKTPPAVE  
ELLRYFTITDVTARVATEDVQLGDTTITAGDGVVISGLAADHDPTVFTD  
PNQIDLERGARHHVAFGFQPHQCIGQTLARLELQIVFDTLFRRIPTLRRLA  
APLDDIPFKSDAIIYGAEELPVAW

>CYP1037B2 (2563524149) *Salinispora pacifica* CNY673

MSDHLPEINLVDPKLYSHGDPHAQWRWLRDHEPVYRHPATDLPAFWSLTR  
YDHVKSAYRDADTYSSARGILLRPADHGDDPGGGRTLALTDPPRHRQLRE  
LVDGWFAVRAVRTMETDIGGIVKRVVDRALEQGSCDFVTEIAARMPLYVI  
CRMMGIPESDWEHLYSLTSQAFTAGDPVERRFAHLAILDYFDALQEEKAR  
RPGDDLVSILATARIDGSPLGAETVILNCDNLLVGGTENTRITASGGMLA  
FLQHPEQWAVVAGDPAALPSAIEEVLRTSTATHIMRTTTRPVEIAGRHI  
PAGERVIFWLPSANRDESVFEGSESFLVRRQPNRHLLTGHGAHFCLGGVL  
ARAE LRLLYRELLGRSLRVELDGEPEMLDSIVVNGPRTLVPVRLTAGR

>CYP211C1 (2562069341) *Salinispora arenicola* CNY281

VVDVEGLLTRLYSAQGRQDPFPVYADLHAQGPIAALPPEPERRRVA AVAV  
GYDLVGAVLRDPEWSKAPPPGWTEQEILRTLQTSMMFINPPDHGRMRHV  
AGTFTPRRLGALEPVVNRVADELDRMADAGPGEVDFVAEFAYPLPARVM  
AEFIGIPETELDWYRERVVIDAFLDVAGKTPQRLDAANAAGAE LRAFYG  
ELLAHRRRTPGEDLISGLVEAVDAGGVELTEDELISNLIVLFNASFVTTV  
YMLSNGLPVLLAHPEVAATLADDPVLTAGAVDEILRLQAPVHLLARAAPR  
DTVLGGVPI PQGQNVLLVIAAANRDP AHFPDPDRFDPRRS GPPSLAFGLG  
LHYCLGA AVSRLEGRALPRLLSRFPRLRITEQPVYSGSLFLRGIDKLSV  
SPGEGSTRE

>CYP125A41 (2562069484) *Salinispora arenicola* CNY281

MTEPRIPAGFDFTDPEVLAHRVPREEFAELRRRTAPVWWNAQPRGSAGFDD  
DGYWVVTRYADVM TVSRSDTYSTRENTAIARLRPD TTREDIEMQRVIML  
NVDPP EHTKLRAIVSRGFTPRAINALRGSLAERA EHIVRDAAVRGV GDFV  
TDVACELPLQAI AELIGVPQHRRKVF DWSNQLIGYDDPAYGTDPLTASA  
ELLAYAMEMAEERQRSPSDDLVT KL VNAQIDGEHLTTDEF GFFVMLLAVA  
GNETTRNAITHGMVAF LDNPEQWELFKAERPTSAVEE IIRWATPVNVFQR  
TALVDTVLGGQTISAGQRVALFYGSANFDEAVFEDPDRFDITRSPNPHLG  
FGGSGAHFCLGANLARLEIELIFNSIADHLPDIRKVAAPQRLRSGWINGI  
RQMPVRYR

>CYP211B9 (2562069889) *Salinispora arenicola* CNY281

MDVSEAVAVLISP SGR LDPYPTYEQ LRAHG PVSQTTAGLFVVTGYAEADM  
VLRDPRFVVLDDDLRDDVFPHWQDSPAIKSIARSMLRTNPPDHSRLRRLA  
AGAFTPRRVAAMREV VTAQADELVD EMIRAGGDGARVDFMDRFAYPLPVA  
VICALLGVPAADR SRFQRWAGDVTGILEPEITPEELTVADAGANDLRDYF  
TGLIEQRRRV PADDLTTALVQAHDADGDRLSGEELLANLVVLLVAGFETT  
TNLLGNGLV VLLTHPEAAAAALRDQPD LAPGYVDELLRYDSPVQLTTRTVR  
ESVSFAGTEL PAGSWLLLLLGAANRDPRRFPDPARFDPWRAQSQPLSFGA  
GPHYCLGAGLARLEAQVAFPLLLRRLPELALAGRPSRRTRLTLRGYETLP  
ITVGAVAADRGT PAGVAPGTP

>CYP1005A1 (2562069980) *Salinispora arenicola* CNY281

VSAVLFRSWTKTAGTRWPDVTRVADQSGTEHLVVTRHALVRQVLT DQATY  
RPDNAL EAVTPVPVAAALRVLAGHRFRLPPTLANNGGVSHPAIRALVADAL  
HPTKVAAQR PWTGLVADRVA AIRTTLDSGGPVDLYADLTADLPLLVLAR  
LVELPDAPVD AVKQFARA ALELFWAPLDADRQLALADEVGRFHQVLR EFA  
DTGGGLAAALRATGHPPDVLVGALFFLLVAGQETTSQFL TLLLHRLTGEP  
RIRAALRAGSISVADVVEEGLRLEPPIVTWRRVA AVDSTLGGTAVAAGTS  
VLLWLARAGRDP AVVAAPDEF RFGQRGSRRLAFGAGAHRC LGDQLARME  
AAVVVEQVTPLLDGVTVIRPPWYPDNL TFRMPDAFVVRR

>CYP1051A5 (2562070216) *Salinispora arenicola* CNY281

MATDAAVTRARTVPAWKALPAAVRDTHR ALVDIGNWSDGDVVRVSLGVSR  
PYLV TNPAHVQEVLHERAAIYPRGDDTALWRSVRKL VGDGILAEGDAAWAA  
SRRVLAPMFRPVRINAMVDTMADAIAGAVDDLHGAATAGVPIDVGRELSR  
IVCSAIMRVFFADRITVRDALRIMKAQETIVTAMAPRILAPLVPWWIPMP  
GDRRFRAAVRSIDNILLPVLRQAQRQPDDGDDL SRLVVRARADDGQGLSE  
KRMRDDLVSMVAVTTETSTVVLTWLVPLLANHPDVANRLYDEIERVVGGG  
PVRGDHLAELTYTRMVLDELLRLYPAGWILPRRAAAADVLGGVRIDKGAT  
VILSPYATQRM TAWWGPTAEVFDPERFAAGRETADGRHRYAHY PFGVGMH  
RCLGEHLFNLEAILIVATLLSRFRFTLTDTSM PGVKVAASTRPARRVEMI  
VKPVAPIPAR

>CYP166A4 (2562070526) *Salinispora arenicola* CNY281

MTDAISFELPWARTDKFDPPAVFDALREQRPLARMRYPDGHVGVIVSSYE  
LVREVLGDPRFSHSCAVGHFPVTHQGQVIPTHPQIPGMFIHMDPPEHTRY  
RRLLTGEFTVRRTSRLTG HVEAVAAEQIEVMREHGAPADLVATFAQPLVL

RVLSSGLVGLPYGERDRYLHAVTLLHDAEADPAEAAAAAYEQAGAYLDEVIE  
RRRRQPEDDLISTLVGDGELTGEELRNIVTLLLFAGYETTESALAVGMFA  
LLHHEDQLARLRADPTKIDAAIEELLRYLTVNQYHTYRTASEDIELHGEV  
INKGDSVTVSLPAANRDPARFACPAELDIDRETSGHVAFGFGIHQCLGQN  
LARVELRAGLSALLRAFPNRLRLAVSADEVPLRLQGSVFAVKNLPVCW

>CYP1522A2 (2562070920) *Salinispora arenicola* CNY281

VKAAHRDLVLATYHDVQEALSNSALTRSIDADRFRGNILEGVLLMLNGV  
QHRDRRRIENTLFRREVLTYYEQELFPVIEETLDSIVRDGGADLVETGA  
LLAVVLSARTVGIDFGIDSLDQRRRLIQYAAAFTRAVIDVAVVPEDEL  
SAASVALAGFTSTFVRASWDRRMALIAAVDAGERAESDLPRDLLTTLLRH  
RGAQGLDDSQVIRETAFYLEAGADTSAQVLTNSMDLLFAHARRDPSVLSR  
LTQDTFLVQRFVHEAVRLRPTVPRIRRRALTDTVLCGAVVPADTLVELDA  
VAANRDVDIFGPSADEFDPWREVPATVPRYAHAFGGGVHSCIGRNLA VGL  
SLRGDQPPPDNHLFGIVPLMVQALLRSGMRPDPGAEPVPDTFSTRWTRWA  
AYPVVFEAVATA

>CYP245A7 (2562071168) *Salinispora arenicola* CNY281

MPSATLPRFALTGWSRENIINPYPVYQRYREVASVHRGEPGGDAPDTFYV  
FSYDEVVQVLSSNCFGRGRSLDAAKASVPVPAEQKALRVIVENWLVFMDP  
PRHTALRSLLNRSFSPRIVTELPRPRIARIAQELLSRLGQQVDVDLVESFA  
APLPILVISELLGIPEERRAWLRANALALQEASSSRAGRVDVGYARAEVA  
AQEFTAYFREQVRLRRGSAGGDLITILATAKERGAPVSLDAIVGTCVHLL  
TAGHETTNSLAKAVLALREHPAVLDELRGADGVTTDAVEEFLRYDPPVQ  
AVTRWAHQDCTLGGCDIPRGSRVVALLGSANRDPARFPSPDVLVRRPAD  
RNLSFGLGIHYCLGATLARAEEIIGLQALLDGVPTLGYGTQHVDYADDLV  
FHGPSRLVLVNLGERCK

>CYP244A4 (2562071172) *Salinispora arenicola* CNY281

VSATTNTEVTEAPETNMPVDPGLFDCMPDLIAAARVAPVVRIPYLGRHAW  
VVCDELVKQALTHPKMGKDITLVPWMMRQPGLMVTAQPDPEYARAMIMS  
DGDNHARIRRIHAPVLSRPNTERWGERVADKVEGFLDELSQAGSEGSTE  
NVVTNYTHKIPLAFISEMLGLPPEAEHRLRGITDIMLYSSDYAARREAIG  
GLFGAVEDWVRNPAGLRDGVIHGLLAASDGPDAAVTEGEVIVWTLGMIIT  
GYETTGLSLISTSLYEAIIRPPHERPETDEDITAWIEETLRVHPPFPHTW  
RFPLEDIELGGYLIPKGAPVQVSIAAANRKPGEAGDSFDAERRGHGHLSE  
GLGMHYCIGAPLVRLEAQIAVRGFLRRFPRLRLSAETAVQWESEWMIRRM  
SVLPAVLS

>CYP1004B5 (2562071335) *Salinispora arenicola* CNY281

MTAPALAPRFDALDPNVVEDPYPEYARLRAAGPLCRLGPGSWGVTREFADV  
TGLQHDPRLGSEFPAGYHQISVGDGPASAFFQRIIMLYRDPDPDHVRLRRLM  
SRAFSPAVVRRLRSHIEDLVDGLLAPALAAGRMDLVPDELAYPLPVRVVC  
LMGIPPESTDDVRHAMNLGRAFTAVVPEHARAEDVAVRWLREHLGALL  
EQRRSRRGDDLRLSLDAAESGDTLSADEIVDNTVFSFFAGFETTVHMIT  
TGTAALLAHPDQLARLRADRSVTTAVDEFWRWDAPIQGTARYVREPIEI  
GGRTIIRTGRVLVLMIGSANHDEQRFARPDRLDVGRQDNPHVAFGGGAHL  
LGAFARMGAVVFDRLARLAVLEPDGPTVREPNTPFRAVASVPVRIGDV

>CYP1004A5 (2562071339) *Salinispora arenicola* CNY281

MRADTARPHLSAAFLATKDDPYPAYAELRARGPLIRAEELGQWLVTGHGAV  
SALLRDGRLESMPAEYTRLTLGDSPGVDLNRIVLTRTPPDHTWLRRFI

GRALGTPAVRRLHDRIA AATDALLEPALDRGRLDVVTE LAVPLPVGVVCD  
LIGIPTGDRPEVLTRVVALAKVFDAANLTPADLTDINTALPWLHDYLGDL  
LATRRASPGGP TLAGMYWEESASDRLAVADFVDNMLFLFHAGFETTMGLV  
SNGFAALLDHPEQLRRLRADPALVPSAVEEF LRYDAPIQN VIRVAREPVE  
VAGQKIRAGRTVLLLLGAANRDEEVFRDAARLDVGRDPNPHLGFGGGLHH  
CVGTALARLMSVVVFERLVGRVAVLGPAAPAVRRRHASLSYDHLPLAVA  
AR

>CYP125G5 (2562071378) *Salinispora arenicola* CNY281

MSMDVVSTGNRADIAPATYAAGVPYAEFARLRRDEPVSWVPEAALWRRS  
GEGRMLSQGP GFWAVTTTHDGVVSASRQPEV FSSGRQGAFLADPRTTADLE  
QARQLLVNMDAPQHSRVRKLVTA VFTPRAIRALGESVTAHARALVDRAVQ  
QEECDVVADLAAELPLMVLADLLGLPREDRHLLYRWSNNLVGFDDPEYGG  
GDVEAYRKTFFEAFQYALSVADERRRAPRDDMLTLLATSEVDGRRLTDRE  
FCNFWLLL VVAGNETTRHLITG SVLALVDNPTQRERLVADD TLLPSAVDE  
LLRWVSPIMQFRRTAIEDTELCGTPIAAGDKVVLWYASANRDAAVFEAPD  
ELRLHRNP NPHLSFGMGPHFCLGAHLARLEARTMLRELAPHL SRFRLTGP  
VVRLESNFVNGVKS LPGSFTGQ

>CYP107FS3 (2562071415) *Salinispora arenicola* CNY281

MPGTQGEQNL TTEVFADPKALFATLGSRQPLHRISLPDGMPAVLVTGNRE  
ARQALSDPRLVRSITAAAPELHKYHPLASDDYALSRHMLFADPPDHGRMR  
RLVSTAFTRRRVEQMRPRIQRITDDLIDVIAAKGEADLVEALALPLPIAV  
ISDMLGVPPFADRSFERHAEVL TGINASSGFD AIIAAGRWFDEYLAGLVQ  
QRRREPRDDLISGMLAAQDKGDR L TDVELRSNALLLLSAGFETT VNLVAN  
GLLALLRHPEAMAALRSEPKLMTTAVDELLRYDSPVSCVTYHFAQEPVEI  
GGFEIRSGEHVVIATAAANHDPTVFADPSRLDLRREGSGQILSF SHGTHF  
CLGAPLARLEGEVAFGTVLRRLAGLRLAVPADSLIWKASFVLHRLERLPV  
TFTPGP

>CYP105CN4 (2562071416) *Salinispora arenicola* CNY281

MAAPAPQATQSTTPHPPSYPLPRECPYRPSAGTAQLRDAGPVGT VRLYDG  
RTAWLVTGAAEARALLADSRVSNRADFPNYPVM DERHLSMRATREMAREE  
EGGFAAALFGMDPPEHTRQRQLLLPRFTVRRVAARRPAIQ RIVDEHLDAM  
AATGSPADLVSAFATPVPTMVVCTHLGVPYQDRTRFEP AVAGLFEPDRAD  
AAMAELTAYLHQ LIETKQSEPGDGVIDHLIAHHLRPGAIDRAELVAIASA  
ILVAGTVTTSSAIALGLTALLEAPGQYTALVDNPD LVP GAVNEILRYLSL  
VEQLARVATEDIEIGGKLIRAGDGIIVSFAAGNLD PNV TTHPDRLDVALP  
PTNH LAFSHGIHHCIGQNLALLELDIAFRALVTRFPALRLAVPAEQ LPTY  
VAGDVPR LACL PVTW

>CYP105CP2 (2562071418) *Salinispora arenicola* CNY281

MTKSMPVQDLPAFFIPRECPYRPSAQHVSLRSGGPM AKVRLYNGRTAWLV  
TDSAQARAVLSDYRRVSIKPYHGNYPLLNEEF EKVVDSGYADVLFGVDPP  
EHTRQRQMIMPSFTLRRTAVLRPD IQRIVDGKLD EMMRHGAPGDLVTEFA  
QPVP SMVMSFLLGVPWEDHEEFETPAHKLFVPELAEEATTEL GAYLERLI  
QRKEQPGGTPGGTGLLDDLIRDHLQAGALS RDELVHIAMAMLVAGTDTT  
NVISLGLTALLDNPDQWDALRDNPD ELIPGAVEEILRYTSLIEAFARVAV  
SNIEFN GAVIKEGEGILISAAGVNFDPALAPDPGRFDIRRP RPSPFSFSH  
GIHRCPGDNLARLELEIAFRSLVTRMPNLRTAKPIDQIPSNNDGTLQRL  
YELPVVW

>CYP208A20 (2562071537) *Salinispora arenicola* CNY281

MTLDTIAPRVPLGPPRTAALRMLLVMKRDRLGMLTAAAARYGDASRLPVG  
HKALWLFNHPRYAKHVLADNSANYHKGIGLVHARRALGDGLLTSEGDLWR  
KQRKVIQPAFQSRRIAQQAGMIAEEAFALVERLRARAGTGPELTAEALTG  
LTLGVLGRSLLDADLAGFDSIGDSFATVQDQAMFELETNTVPMWIPLPR  
QIRFRARRRKLQAVVDQLVDGRAGNLVDRVDVLSRLILSARGEADPRVGH  
ARLRDELVTLLLAGHETTASTLGWTLSLIDRHFGVWERLHAEAVEVLGDR  
LPEHDDVRRLRYTVMVVEEAMRLFPPVWLLPRRALAPDTIGEYRVPANAD  
VVISPYTLHRHPEFWPNPERFDPERFAPGRAADRPRYAYLPFGAGPRFCV  
GNNLGMMEAVFVIALLCRHLRLTGVPGYRLVPEPMLSLRIRGGLPLVVRP  
VS

>CYP107AY15 (2562072015) *Salinispora arenicola* CNY281

MTAEPTPIPRSGARLGQEYDQLRKTDGVHQVLLPDASLAWLVTNPEVVAR  
ALADPRLALNRRNSRGGWSGFALPPALDANLLNLDAPDHTRLRRLVGPFAF  
SPQ RVAALRPAIRRAAEHLLDTLVATSGPTDLVTGYCNPLSVQVIADLMG  
VPEAGRTNLRATWDTMLTSYPPDRDAIRQAVTDLHGYYVDLIDGKQQQPG  
DDL LSVLV TIEQDGDRLRDELTSLAFLILFAGYENTANLIAS TVLWLLD  
HGGLTEVP ISEAIEETLRHEPPAPVAIRRFPTEDIVIGDATIPAGDTVLI  
SVAAATRGADGNAAKLAFNGPHYCLGAALARVEAEALTVLVRRLPGLT  
LAVPPAQVRWRPTFRTHGPAELLVGW

>CYP105AB8 (2562072230) *Salinispora arenicola* CNY281

MTETASSRLTDTTEFPVQRECPFAEPVEYEQIRERSSIAMVRLTGGGEAWW  
ISGHEQGRAVLADRRFSSDRKANFFVSTDPATRKRLHAQPLSLISMDG  
AEHTQARRALIGEFTVRRLAALRPRIQCIVDQCIDEMLTDDRQCADLVKA  
LSLPVPSLVICELLGVPYADHDFEQEHTATLVRRNTASEVRQHSIDELNA  
YLGALIDRKLANPDDDLLGRQIARQHRDGTFRASMVSLAFLLLVAGHET  
TANMISLGVVGLLQHPEQLTMKNDPKTPLAIEELLRFFTIVDSVTSRV  
ATEDVQFGDTTINAGDGVVVSGLSADWDPTVFADPDRLDLERGARRHHLAF  
GFGPHQCLGQNLARLELQIVFDTLFHRIPTLRLAAPLDTIPFKTDAAIYG  
ARELPVAW

>CYP107AX2 (2562072591) *Salinispora arenicola* CNY281

MTSRPTAVFDHRLLRDPHSRYNALRDQAPVHHVLTDPGAPAWLVTRYDDV  
RAAFTDPRLSVDKRFSGTDGEHGSSLPELDAHLLNRDPPDHTRLRRLAA  
AAFTPRRVADLHPAVERIVSTLLDGLAGHDRAELIGSLASPLPLQVMHEL  
LGLPTQANIDFRTWTNTLLSADANQPAQSRAAMANMRRFLIEQLAHKKAQ  
PGDDLTLGLLAAREDDRLTDELVAMVFLLMFAGYDNTAALIGTVTHAL  
LTTAELHEAVRGGSLALDELIDEVLRWNPAFPLAVRRFARESITIAGQTI  
PAGDRIWLCLASANRDPAQFTQPDELGIVGLRRPHLSFGHGIHYCLGAPL  
ARLQTTIAVTSLLNRFPEMRLAVPAHDIRWRESFRLRGLIALPVFLA

>CYP2611B2 (2562072698) *Salinispora arenicola* CNY281

MTTAARRSDLLPTPPMVPGLPLIGSMLDWQRDHAGFFRNAYERFGPIYSV  
RLGPQRGVVLVGPRYHEFFYKEVDNRLSVPELYRFVVPMFGEVALAATDT  
DTRRRHVGLLQSAFQGRRLTHYTGQAADETHRWLDSLGDGGQFDLWDSLE  
SLVMRIAATTLTGPEVRARIDDFRPLADLARGMDVFLPPNLPLPKFIRR  
DRARRQLIEMIQPVLAERRRRTDGPGDFLQTLVGDAQVRAEGDATLVGLS  
LMTLFTGYITTCQAQLAWALILLRHPDHRESVVAEVDAAARGIDGLVPPET  
RLPRLEWALKEAIRLRPVM SHYARHNRTDMELDGYRLPAGWLTILCPAVA  
HRLPEYFTDPDHYDPGRFAPDRAEDRRHPYAMIGFSGGFYRCPGSAFGMN

EMRVVVAALLARFHLEAPAAEPRPSFDMGVTRPASPCIIGYRTRR

>CYP2098A2 (2562072701) *Salinispora arenicola* CNY281

MTSAAEISYDPFDPPELVQDPHPFYHRIRQLAPVFPSTMSSDMWMVSDDAA  
KVYVVTRYEDLAYVLEHPDLFPSPGNKTGPEDPPEVTEELARGIPKAKTLY  
DSDQPGHSRLRALMQGAWSTQQVEQFIPRIRRWADRTIDGFAADGSAELEF  
ADYADKVMDBAILDFLGIPEEDHEQVHAWDKLWVKVFIPGHPPEDQRAAA  
REIVEYQRYLERLFTERRNDPRDDVASALVHATTEDGDRLTMAELVWGLM  
EMYGAGYGNATAEGLGNMLFLLLSERQRWEELRHQRGALADAVEEGLRLEG  
PVQWLSREAAGDTELGGVTIPKGSVMVLYAAANRDPEAFPEPDDFRTSR  
RGTTHTGAKHVAHGRGIHYCVGAGWSRVALRVGVEALMDRLPDLRLADDF  
TPEFHLPEPMVRCVKSLPAVWPVR

>CYP105BL7 (2562072764) *Salinispora arenicola* CNY281

MSSHSAAPDPETATPLHTLAPELTFPQFERSTPFDPQAYTELSDRCPV  
APIRMPDGKPSWLVTSEFEGVRTALSDPRFSSDMSPGFPNLNGRPVDTV  
KDTLRDMDGERHRYRRTLTGELS VKRTKAMQPVITQITDEALDQLAAAG  
PGADLVKHVALVIPSRVACHLVGVPFSDHELFTGMVNTLMDSNSSADQIV  
AARQGMVSYFDELVTDRHHDRDDLGRMVRRLATGELTRDMVITLAWI  
TMAAGQETTARMIGLGVAALLRHPDQLELLRREPHELLPGAVDELMRYLSV  
IQLGIPRVAIDDVEIDGQTVTAGEGVVALLPLANRDPVAFDRPDELDVRR  
NARQHLTFSYGPHQCPGHALARLELEVVFGRLLERFPTLRLADSDADLKV  
WDKAIVYGVSELAVTW

>CYP248A2 (2562072861) *Salinispora arenicola* CNY281

VLADAVTAFDPTAVDVRRDPYPSYHWLLRHDPVHRGAHQVWYVSRAFVDR  
AVLGDERFARTGIRRFWTDLVGPGLLSQIVGDIILFQDEPDHGRLRGVVG  
PAFSPSALRRLEPTIEATVNDLLRPARALGAMDVVADLAYPLALRAVLGL  
LGLPAGDADAVGRWSQAVGRTLDRGATAEDMRRGHTAIAEFADYVERALA  
ERREDGADLLALMLAAHQRLMSRNEIISTVVTFIFTGHETVASQLGNGL  
LSLLDHPEQWESVRRRPHLLPQAVEECLRFDPVQSNTRQLTADVELHGR  
RLRRDDVVVVLAGAANRDPGRYDRPDELDIRRDPVPSMSFGAGMRYCLGS  
YLARLQLRTALGAMVALPDLRLVTSPNELAYQPRTMFRGLTRLPVAFTPA  
A

>CYP105W2 (2562072869) *Salinispora arenicola* CNY281

MTGYQDPPTGNQPGTPVPSGSTDPGIDAFPLPRRCPPSPPAEYARLRAEH  
PVVRLPMLGGDMAVVSRRHADVRQVLS DPRMSADRRRPGFPKFAPTTEGQ  
RQASFANFRPPLNWLDPPEHAIFRRQIVDEFVSVRVRQLRALVERVVDTH  
LDALAAAVPGADLVSTFAYPVPSQVICEVLGVYPYGEHEFFERRSTLMFRR  
STPADDRARCAREIREFLDVVVTDKERRPGDDVLSRLLQRQRGAGGVDHE  
AAVSMAFVLLVAGHVTTSNMLALSVLALLTHPARLARLRAEPPERFPAAVE  
ELLRYFTVVEAATARTATAEVTIGGVTTAAGEGVVALGQAANRDPGVFEH  
PDEFDPDRDARAHAFGHGRHICPGQHLARLEMEVALSRLFRRLPGLRLT  
MEVSDLPLKEDSNIFGLYALPVAW

>CYP107Q4 (2562072921) *Salinispora arenicola* CNY281

MTTTAETS AETIDLFSPEVVADPFGWYARLREETGPTTGTLNIGTMMGGP  
EMWLVTTRYEDVRQVLTDPFRFLTNPADSPLEDIRAGVFKRLDFPPDLIPW  
MANLLNVSDGEDHTRLRKLVSYALTAHRIGKLRPRVEKITADLLDKLAED

GKDGSPVDLVEEYCYPLPVTVICELVGIDEPDRPHWRAWGDSMATMNGER  
IPTTLVTCIELARELIEKRRAPQDDLVLTALVQAQAEQNRVSDDEIIGI  
LFSLVTAGHQTTTYLIGNSVILLLENPDQLARLKENPSMWPQAVRELQRL  
GPIQFAQPRFPSEDIELGGVTIPRGAPVAPLLLAANTDPRRFPDPNKLI  
DRLAVGSESHLGFKGKIHRCGLGQHLAYQEAVALQGLFTRFPNLSLAVPR  
EEIPWILRPGFTRTRTLPLKLV

>CYP105G8 (2562072922) *Salinispora arenicola* CNY281

LTIETTETPPADDSLRAPLPRKFMQRDDPSKLPALVELAEQAPVGRSTL  
PDGDPFWMVSGYDEARAVLSDPRFSSDRFHYHPRFNKLSGQLGERLRNDK  
ARAGSFINMDPPEHTRYRKLLTGQFTVRRMRQLAARIEQIVTEQLEAMLV  
EGNSADLVSAFAVPVPSLMICELLGVRREDRTEFQHRAAGLLQTDLPKQ  
AVENLEAQRAFMQRLVTDKRRTPADDMISALVHHADADPPLTDDELVGIA  
TLLLFAGLDTTASMLGLGMFVLLQRPEHMAVLRNDPSRIGDAVEELLRYL  
TVVSAGLFRFAKEDVVLGGEHIPAGSTVVVSLMAANRDGRHWSEPEMLDV  
TRARSSHLAFGHGVHQCLGQQARIELTVGITELLRRLPNVRLAVPPGDV  
PLRNDMITYGVHRLPIVWDAP

>CYP162L1 (2562073011) *Salinispora arenicola* CNY281

MSDAVDLLNPATFATCSFHDQLARLRGQPGLYRHPEPNGPGFWVVSRYRD  
ALAVYADPTTFSSRSGIRLGASQAQAAVADQMMVSDPPRHGRIRHVG  
VPFGPTTVARWHDRVADAVAALVDDAVAREHCDVADLTVRLPNEVICAM  
MDLPREDWARIGALTTOGLDSDPDPVTRLDANAEIFLYFSEQLEHRRTRPG  
DDLSSMLLHTGTDLSDREDLIVNCSGVLTGASETTRYAAAAGLLALAHKPK  
LWRLLRDVPTGVNDAVEEVLWRTSPGLHGLRTVTHAVDVGTRLAPGDRV  
TVWNCSANRDGTVFPDAGAFRPNRRPNRHIAFGRGPHVCLGARVARLELR  
ELLTALVRRVETVTVTGEPTWASSNFHGLTALPIHLRPALLPIG

>CYP1037B3 (2562073148) *Salinispora arenicola* CNY281

MPIATDDRPAINLVDPALYAEGDPYRQWRWLRHAPVYRHPATELPGFWA  
ITRYDDVREVYRDVQTFSSAHGILLRPEGHGADPGGGRTLALTDPPRHRA  
LRGHVDAWFTKRSIRSLQPTMEKITATVIDLALEAGECDFVTDIAARVPL  
YVICDMMGIPESDWEMLYTLTSQAFGAADADGQRIAHLEILSYFDDLQRA  
KARRPADDLVSVLATAEVDGVRLPPDDVILNCDNLLVGGTENTRISASGG  
MLELLRHQAQWARLGAEPDLMPAAVDEVLRWTSTATHIARTATRPIEIRG  
TRIAAGDLVTLWLPSVNRDESVFDEPDHFDITRRPNRHLALGFGEHFCG  
NVLARVELTLLYQELLTRGLRIEPTAEPTLLRSIVVNGPESMPVRLHG

>CYP162A6 (2562073472) *Salinispora arenicola* CNY281

VAARLPLSVICDMLGVPPEDWDFMLDRTMVALGSGEDELAMAEAHADIL  
SYYEDLIRRRRREPREDVVLTALVNGVVDGTGLTDEEIFLNCDGLISGGNE  
TTRHATIGGFLALLDNPEQWETLRDDPGLLPGAVQEILRYTSPAMHVLRT  
AVAPTRIGEYALNPGDPVALWLSAGNRDPQVFADPDRFDITRSPNPHLTF  
STGAHYCLGSALATSELTVLFDRLLRVDSAEELTGPPRRTRRSILIWGYDS  
VPVRLTAGSER

>CYP211B11 (2515703518) *Salinispora pacifica* CNT003

MDASEAVALLTSPGRLDPYPTYERLRAHGPPVSTAAGFFVVTGYTEADT  
VLRNPRFEVMDDEERDGVFPHWQDSPAMISISRSMIRANPPDHSMRRLA  
AGVFTPRRVAALREVVAQAQADGLVDEMIRAGRGAADVDFMGSFAYPLPVT  
VICALLGVPAADWARFRHWASDLTGVLPEEITPQELAIADAGASELRDYF  
TELIAQRRRAPADDLTALVQAHDADGDRLSGEELLANLVLLLVAGFETT

TNLLGNGLVLLTHPDSATALRGQPELAPGYVEEFLRYDSPVQLTSRTVR  
ESVSLAGVELPAGSWLLVLLGAANRDPARFTDPARFDPRAQSPPLSFGA  
GAHYCLGAGLARLEAQVAFPLLLRRLPELALAGEPTRRHRLTLRGYETLP  
VTVGAVPADPGTPAGVALGTP

>CYP125A65 (2515703866) *Salinispora pacifica* CNT003

MTEPRI PVGFDFTDPAVLERRVPREEFAELRR TAPVWWNVQPRGSAGFDD  
DGYWVVTRYADVMAVS RDSETYSTRENTAIARFQPGTTQADREMQRVIMI  
NVDPP EHTKLR AIVSRGFTPRAINALRGSLAERAERIVRDAAVRG TGDFV  
TDVACELPLQAIAELIGVPQHRRKVF DWSNQLIGYDDPAYGVDPMAAAA  
ELLAYAMEMANERQRNPSDDLVTQLVNAQIDG EHLTTDEF GFFVMLLAVA  
GNETTRNAITHGMLAFLEHPDQWELFKAERPRSAVEE IIRWATPVNVFQR  
TALVDTTLGGQAITAGQRVALFYGSANFDES VFEEPERFDITRSPNPHLG  
FGSGVHFCLGANLARLEIELIFNSIADHMPDIRKVADPQRLRSGWINGI  
REMPVRYR

>CYP208A22 (2515703955) *Salinispora pacifica* CNT003

MTVIADRGGRIPPGPPV TAGLRLLLALGRDRLGMMTSAAA EYGDVARLPV  
GPKKLYFFNHPDHAKHVLADNHANYQKGIGLVHARRALGDGLLTSEGE LW  
RKQRRVIQPAFQNRRLAQYAGAVGQEATRLVARLATRVDGPPVDVLDEMT  
RLTLGVLGRTLLDAELTGFGVGESFAAVQDQAMFELET LNTVPTWIPLR  
RQRRFRRARQHLQEVVDVLA AERGQAVEGRDDVLSRLILSTRAEADPQLG  
RERLRDELVTLLLAGHETTASTLGWSLHLLDQHPELRERVRHEARTVLGD  
RVPAYEDLHQ LRYTAMVVEEAIRLYPPVWILTRKARAEDEIGGYRVPAGA  
DILICPYTLHRHPRFWAE PERFDPERFDPSRTTDRPRYAYIPFGAGPRFC  
VGNNLGMLEATLVLA VLLRDLRLLEGLPGRAVVPEPMLS LRVRGGLPMTVR  
RVD

>CYP124M3 (2515703976) *Salinispora pacifica* CNT003

MTVPIELDAVDLS DNDFWTKPLEYRHAVFNALRAQPGLPHFASPEFGSAP  
RGRGYALTRMDDVLAASRNPSVFISGKGNVAMEVPAEFLDQSLITMDNP  
RHARLRRIVSRGFTMKAVTALMDNASQMAKQIVDEVVERGECDAVVDISA  
KLPLGIICNMGI PDSQQQFVF EQTNVMLGVQDPEYVGEQNDAMLAMSV A  
SQELADLMHELATLR AKNPTDDLISKLLSAEVNGEALTPSEL AHFFILLT  
GAGTETTRNAISWGIQLLTQSPEQREAWLS DIDGVTPTAVEEIVRWSSPV  
ISQRRTVAEDAEPVKLAGQLLGP GDKVLMFYGAANRDPNYFVHPEGFDVR  
RSPNPHVGYGGPGPHFCLGAHLARLEISVMFRELLTRIPDIHATGEPARL  
KSPLINGIKRLPVAFTPGAR

>CYP107AX4 (2515704002) *Salinispora pacifica* CNT003

MTSQPAPVFDQ LLLRDPHRRYNALRDEAPVHHIRTPDGAPAWLVTRYDDV  
RAAFTDPRLSVDKRLSSTDGEHGSSLPPELDAHLLNRDPPDHTRLRLRLAA  
AAFTPRRVADLRPAVERIVSTLLDGLVGHDQAELIGSLASPLPLQVMQEL  
LGLPTQTSVD FRRWTNTLLSADANQPAQSR SAMANMRRFLVEQLAHKRAR  
PGDDLTLGLLAAREDDRLTDDELVAMLFLLMFAGYDNTAALIGNVVHAL  
LTNTELPAAVRTGSLALDELVDGVLRWNPSFPLAVRRFAREPITIAGQTI  
PAGDRIWLCLASANRDPAQFTAPDTLGTTGMRRPHLSFGHGIHYCLGAPL  
ARLQTTVAVTILLDRFP GIRLAVPAHDIRWRESFRLRGLVALPVFL

>CYP107AW7 (2515704017) *Salinispora pacifica* CNT003

VETVTGTSTPPFPYIADPYPTLARIRANGPV SILHSDEGIPMWVIARYR  
DVRAALADPQFGQDARRAQALADNRVAGVTLLGGDIVHMLNSDPPDHTRLR



RHVQGAFTARRVAAMRPLVERITTSLLDGLTGRTTVDLVQDFAFPLPMLV  
ICELLGFPAEERNAYRSWSTAILTHDDDPAAAFATALREMTDYIAVQLRIR  
QTRPGDDILTELLAARDAGQLTDDEIIGMVFLLLIGGHETTNNLLGTATL  
ALMRNPDQHRWLLANQHALPEAIDEFLRYESPVAMATLRFTTTPVAVDDV  
VIPAGELVLVSLGGANRDPDRFPDADRLILDRRDTGHLAFGHGLHRCCLGA  
FLGKLEGEVALGALLRRHPRALAAEVRQLRWRDTIMLRGLESPLVSLHG

>CYP107FH3 (2515705076) *Salinispora pacifica* CNT003

VPIELDEAFVQDPYAVYEKLRAEGPAHRVRMPGVPVLIIGGLPVWLITGYD  
AVRAALADSRSLSTDHRLDGLFAQKDPDRSHRGGFSSALASHMMHTDPPD  
HTRLRKLVSKAFTTRAIEALRPRIQQTDELTAELAGHDTVDLDDAFAP  
LPIRVICLLLGVPVAEQENFRSWSRALVSGHSPEAAATAATEVAAYLGDL  
VERKRHATTDDVLTALVAAHDVDDRLTHTELVSTAYLLFIAGFETTLNAL  
GNGTLHMLHRDQWTALRADRALLDNAVEEFLRLESPLKHATFRCATESL  
RIGDAEIAAGDFVLLAIASANRDPRRFPDPHTLDVRRPAAGHLAFGHGIH  
HCLGAPLARVEVRMAFDALLDAFPDMRLATDPAGLRWRNSTIIRGLDSL  
P  
VHLNN

>CYP2054A3 (2515705081) *Salinispora pacifica* CNT003

MSISADSEQVQGRFPDPYGAHRDDPYTFLAGLGVFYAPLLDAWCVTRED  
MVAVLRDDRSFSARDHNPRPAVALPDDVNQMFRWTRGAGAVAVGSLDPPA  
HAKIRDVLNIGFTPARVRAFEPTMRAVAADLADRIGDAPEFDFIADFAP  
FALEVIGRRLGVPDDYLDRCRTWSEQRIELMMAQGDADHDRLREFARGLM  
EFGEFARSLVRDRVADPRDDLISELLHDGKAGRTLTADEVAVQIPTLIFA  
GHMTCAEALGTIFYQQLRSPGGWARVVDRTIPVGDVVEEGLRFDSPLAGM  
YRTATRDVTVGGIRLTAGSRLLLLYGAAGRDSRAHACPAAFRPGDGSSGH  
LAFGHGIHFCLGAGFARAELRVAVEVLAARMPDLGLAPGRPPRFRPVFPL  
RALTELVRVTRSGGSGP

>CYP161N4 (2515705086) *Salinispora pacifica* CNT003

VNTVAQLPFTQTHVLDVAPALRLLQSRGKVHRVRTPEGVPAWLVTGHAEV  
QQLDDDDRLSRSDPGGRDGGTALLNKLLGPLADDHPRLRSLLPQFTPER  
LEPLRAVVEKLTEQHLDELAARTPPVDLRPALAMSLPILVLCEWLGVPAE  
DKGRFSVWTQDAAGVQDPERSQRGLAELFGYCRQLVAAKRQDPGDDVISR  
LIATAGIGDTEVVALTALLLFGGYETTVARIGTGVLNLLTNPDQWAAVRA  
DPALVPATVDELLRRSMPNPNHNGMPRFAVTGFEIDGAAIRAGDLVLLNI  
IAANHDETAFFDPDRDLITRPTAGSLAFGYGRHSCVGAPLARMVLRVALS  
RLITRFPDLRLAVGVDELKLRHETLVGGLVELPVWTWGPR

>CYP1005A6 (2515705456) *Salinispora pacifica* CNT003

VSAVLFRSWTKTAGTHWPAVTRVADQQGTEHLVVTEHALVRQVLTQVQTY  
RPDNALDSVTPIPVAAALRVLAGHRFRLPPTLANNGGVSHPAIRALVADAL  
HPAKVAAQRPWLTELVAERVAAIRATLDSGGSADLHAELSADLPLLVLAR  
LVELPDAPVSAVKQFARAALFWAPLDADRQLALADEVGRFHQVLRFA  
DTGGGLAAALRATGHPPDVLVGALFFLLVAGQETTSQFLTLHRLAGEP  
TVRAALRDGSVSVPNVVEEGLRLEPPIVWRRVAAVDSTLGGTAVPAGTS  
VLLWLARAGRDPAIVSAPDEFPRPGQRGSRRLAFGAGAHRCCLGDQLARME  
AAVVVEQVSPLLDGVTVVWRAPWYPDNLTFRMPDAFVIRRGPAAGAAER

>CYP107AY9 (2515706497) *Salinispora pacifica* CNT003

MSQDQPTRAELAPIPRSGARIGPEYDQLRKTDGVHQLVLLPDTSMWLVT  
PDLVSRALADPRLALNRKHSRGGWSGFALPPALDANLLNLDAPDHTRLRR

LVGPAFSPQORVAALRPRIQRTAEELAETMVATGSPVDLVTGYCTPLSVQV  
IADLLGVPEAGRTDLRAWTDMLTSYPPDRDAIRQAVVELHGYYVNLIEA  
KQQRPGDDLSSALVATEQEGDRLTRDELTSALFLILFAGYENTANLIAST  
VLRLLDHGSLRGVVRVSEAIEETLRLEPPAPAAIRRFPTTEMTIGGATIPA  
GDTVLLSIAAATRGADGNPARLAFGNGPHYCLGAALARVEAEEAITVLAR  
RLPGLALAVPGAPVRWRPTFRTHGPAELLVAV

>CYP105AB28 (2515706557) *Salinispora pacifica* CNT003

MTETASTTTTPGISSTTTSGPASGEVTDQFPLERGCFFSTPTEYEQIREH  
SPLAKVRLTTGREAWWIAGHELGRAVLADRRFSSDRRRDNFFVSTDPE  
RKQLRDQPTSMIGMDGAHAQARRALMGFTVRRMAGLRPRIQQIVDQHI  
DEMLSSDQRAADLVEALSLPVPSLVICELLGVYPYADHDFQARSGLIRH  
TTPTEVRLRIQKELNTYLALIDRKVADPTDDLLSRQIAKHHAAGTFDRT  
SLVSMAFLLLIAGHETTANMISLGVVGLLQHPDQLAMIKEDPEKTPPAVE  
ELLRYFTIADTVTARVATEDVQLGGTTINAGDGVVISGLAADHDPTVFTD  
PDRDLERGARHHVAFGFGPHQCIGQTLARMELQIVFDTLFRRIPTLRLA  
APLDDIPFKSDAFVYGAERLPVAV

>CYP162B3 (2515706687) *Salinispora pacifica* CNT003

MSEEPEMHIDLLDPAPFGRNDFWSTFTWLRTHSPVHWHPEPGGDGFWALS  
KHRDIMKVYADSDTFSSGQGMRLGSDPAVAVAVSQRMLIVSDVPHHTRLK  
RALALAFGPQQMPRLKTLVEEVVYELLAESTEHELDLDFIDLAKQLPNRVV  
CVMGIPRADWSWIGALTDAFSDPDDSVRSKAHSEIFLYFIELLRERRA  
RSGDDLISQIAHETLVDEGDGVERPLSDEEIVFNCNGVLSGANETTRYSA  
AGAVHMF AEHPQWELLRTRGQDGIATAAEEILRWTTPGVHALRTATRDT  
EINGTPIAKGDRVTLWNVSANRDEDVFTDPHAFRVDRRPNRHVAFGHGRH  
LCLGARLARFELQALLTGLLAHVVDGFELTGPAVFNSNFTWGIKSLPVRL  
LRSRSFAPAERAAL

>CYP162G1 (2515707145) *Salinispora pacifica* CNT003

VDIDLADPAFFAEQDFVAHFRLREESPLHWNPDGKEPGFWSLTRYDDCA  
RVQKDPVTFSSSEITNTLGQHRWTGDHGAGRMLTHTDGRRHTELRGIVGRA  
FTPRAIATLEPYLRSVVAETFEQALEHRRVDFVETMAMLPVASIAALLGV  
PRADWPMVLKLTAAFGAGDSELGMSRDARIAAAAAHTQLLLLYCQDLMES  
RRRQPGDDIATRLVQAQEDGRLTEEEAMLFFDILLGGNETTRHGAVGGL  
LALIANPEQWAALRREPGLVDSAVQEILRYVSPSRHVLRSVTKDIELYGR  
TVRAGEQIVVWHSSANRDAAVFDHPDEFRLDRDPNPHLGLGSGSHYCVGA  
SLATLELRLTLEALSARVGAARVLEPPVPLASTVINGFKQVIVELTPS

>CYP107E37 (2515707540) *Salinispora pacifica* CNT003

VTIDQEIREYPPFRESRGIGIDPTYELLRRTEPLARVQLPYGEVSWLVTRY  
EDVKTVLTDPRFSRAAAQGKDQPRTRAEMTYEGIIIGLDPPDHTRLRRLAG  
KALTARRVNIAIRADAQRIANEYVDEMIAGKSPGDLVEAFALPYPVTVICE  
LLGVFFEDRAQFRIWTEGLTSTSEQLMVYAEQLFDYMGKLVAQRRAEPTD  
DLLGALVKARDEGDRLTEQELLSIAGVGLLLTGIVETVSTHIPPVYALLT  
HPELMAQLRADRSVPAAVEELLRMIPLNPAAMFPRYAVEDVTLSGITVR  
AGQPVLVSLPGANRDPEVFENPETFDFTREQNPHVAFGHGPHHCLGAQLA  
RMELQVALHTVLDRFPDLRLADGDEGVSWKSGLLVRGPSRLLVGW

>CYP107FH4 (2515707948) *Salinispora pacifica* CNT003

MPPGIGTPIRKNVMTQIPLSPDIIELDDQFMQDPHAVYARLNEKGPLHQV

RIPPGVPVCGGLTVWLVTGYDQVRAALADPRLSTDRLKTEALFAQNQPDS  
TKRGGSSTIANHMLHNDPPDHTRLRLKLVNKAFTSRAVERLVPQIERIAD  
ELLDSLSERETVDLLDLYAFPLTFRVICALIGVPEEDQENFKEWSKQLIS  
GGSAEVAAAASAIMHDYLTRLVASKRDAPGEDVLSALVQARDADDRLAEN  
ELISMAFLLIIGAHETTANTVSNGLLHMLTNLSQWEALARDSLLAGAIE  
EFLRLESPLKHATFRCVTESLWIGDVLPAGDFVLISLAAANRHSGHFPG  
DPQVLDIERQTRGHVAFGHGIHYCLGAPLARVEAHIAFSALLNRYPGMRL  
AADPQDLRWRTSTLIRGLHELPVRLVSAPQGHVGS

>CYP208A24 (2515693045) *Salinispora pacifica* CNT569

VTALADRPSRLYPGPSPWSAPWLLARMARNRLDVMRSVSARYGDAVRLP  
LGPKTLYFFNHPDHAKHVLAENPGSYHKGIGLVHARRTLGDGLLTSEGEL  
WRKQRKTIQPVFQARRIARQAGAI AEEAVGLADRLHTMVGRDEPVDIRHE  
MTDLTLGVLGRTLDDTLGDFGGIGDAFESVQDQAI FEMMSLGAVPTWVP  
LPRQRRFRARRAELOQDVVDQLVARRRAAGGVEGRDDVVSRLIESTGEETD  
PQVARQRMDELVTLLLAGHETTASTLTWAFQLLDQHHDVWERVHAEAVE  
VLGDRI PVYEDLHRLRYTAMVVDEVMRLYPPVWLLPRIAQRDDVVGGYHV  
PAGADLVFCPYTLHRHPEFWPEPDRFNPDRFDPELGTDRPRYAYIPFGAG  
PRFCVGNTLGLMEAVFVIACVARRRLRLSVQPGYRLVPEPMLTLRVRGGLP  
MRVHEA

>CYP125A15 (2515693137) *Salinispora pacifica* CNT569

MTEPRI PAGFDFTDPAVLERRVPREEFAELRRTVPVWWNVQPRGAAGFDD  
DGYWVVTRYADVMASRDSETYSTRENTAIARFQPGTTKADLEMQRVIML  
NVDPPHETKLRAIVSRGFTPRAINALRGSLAERAERIVRDAAVRGTGDFV  
TDVACELPLQAI AELIGVPQHHRKVFWDWSNQLIGYDDPAYGVDPLAAAA  
ELLAYAMEMANERQRNPSDDLVTCLVNAQIDGEHLTTDEF GFFVMLLAVA  
GNETTRNAITHGMLAFLEHPDQWELFKAERPRSAVEEII RWATPVNVFQR  
TALVDTTLGGQAI SAGQRVALFYGSANFDES VFEEPERFDITRSPNPHLG  
FGGSGAHFCLGANLARLEIELIFNSIADHMPDIHKVAEPQRLRSGWINGI  
REMPVRYR

>CYP211C5 (2515693276) *Salinispora pacifica* CNT569

VLDVEDLLARLYSAQGRQDPYPVYANLHAQGAIAALAPRPERQRVA AVAV  
GYDLVA AVL RDPEWFKQPPPDWTEQEILRTLQSSMMFINPPDHGRMRHVF  
AGTFTPRRLGALEPVINRVTDELLDRMADVGPGEVDFVAEFAYPLPARVM  
AEFIGIPATELAWYRERVDRIDEFLDVAGKTPERLAAANAAGADLRAFYR  
ELLARRRRTPGDDLISGLVEAVDAGGVELTEDELISNLVVLFNASFVTTV  
YLLSNGLPVLLAHPEVAAAALANDPELAAGAVDEILRLQTPVHLLARTAPR  
DTVLGGVSI PQGQNVLLLLIAAANRDP AHFPEPDRFDPRRPGPPSLAFGLG  
LHYCLGAAVSRLEGRALPRLLSRFPRLRILEQPVYSGSLFLRGIDKLSV  
SPGGREHP

>CYP125G4 (2515695237) *Salinispora pacifica* CNT569

MSTEIVSTGNRADI AHPATYAAGVPYAEFARLRREEPVSWVPEAPLWRRS  
GEGRILSQGPGFWAVTTHEGVVAASRQPEVFS SGRQGAFLADPRTTADLE  
QARQLLVNMDAPQHARVRRLLVTAVFTPRAIRALGESVTAHARNLVERAVR  
QEECDVVADLAAELPLLVLADLLGLPREDRHLLYQWSNNLVGFDDPEYGG  
GDVEAYRRTFFFAFYALS VADERRRAPREDLMTLLATGEADGRRLTDRE  
FCNFWLLL VVAGNETTRHLITGSVLALVDNPTQRERLVADDTLLPSAVEE  
LLRWVSPIMQFRRTAIVDTLHGTPIAAGDKVVLWYASANRDAAVFEAPD  
ELRLHRNPNPHLSFGMGPHFCLGAHLARLEARAMLRELAPHL SRFRLSGQ

VVRLESNFVNGVKSLPGSFTGQ

>CYP1004A3 (2515695276) *Salinispora pacifica* CNT569

MRANTARPHLSAAFLATKDDPYPAYAELRARGPLTRAELGQWLVTGHGAV  
SALLRDGRLESRMPEYTRLTLGDSPGVDFLHRIVLTRTPPEHTRLRRFI  
GQALGTPVVRRLHDRIAAATDALLEPALDRGRLDVVTELAVPLPVGVVCD  
LIGIPTGDRPAVLTRVTALAKVFDAANLSPADLADINTALPWLHDYFGDL  
LATRRVSPGGPTLAEMYWEESASDRLAVADFVDNMLFLFHAGFETTMGLV  
SNGVAALLNHPEQLGRLRADPALVPSAVEEFLRYDAPIQNVIRVARKPVE  
VAGQKIRAGRTVLLLLGAANRDEKVFADAERLDVGRDPNPHLGFGGGLHH  
CVGTALARLMVAVVFERLVGRVAVLGPAAPAVRRRHASLSYDHLPLVVA  
AR

>CYP1004B4 (2515695280) *Salinispora pacifica* CNT569

MTTSALAPRFDALDPNVVENPYPEYARLRAAGPLCRLGPGSWGVTREFADV  
TSLQHDPRLGSEFPAGYHEVSVGDGPASAFFQRVMLYRDPPDHIRLRLRV  
SGAFTPAVVRRLRAHIEDLVDELLAPALAAGRMDLVSELAYPLPVRVICR  
LMGIPLESAAEDVRHHATNIGRAFTAVVPEQTRVDADEAVSWLREHLGALL  
EKRRSRPGDDLRLSRLDAEESGDNLSTADEIVDNTVFSFFAGFETTVHMIT  
TGTAALLAHPDQLARLRADPSLVTTAVDEFLRWDAPIQGTARYVREPIEI  
GGRTIRRGRVLVLMIGSANHDERRFARPDRLDVGRQDNPHVAFGGGSHLC  
LGAYLARMEGAVVFDRLARLAVLEPDGPTVREPNTPFRAVASVPVRIGDG

>CYP113E2 (2515695301) *Salinispora pacifica* CNT569

MAAVPRLTFADGGKRVLPWFRMRDDQPVWYDQGTSSWNVFRYADIAQIL  
KDPATFSSDPGRSMPELAEEAEGLVAVDPPRHARLRGLISTAFTPRLV  
EQLAPRVRSIGELLNRAFVDRRVEGEFDIIGDLAYLLPVYVIGELLGLP  
ESDRGYLVRAADEFYAISADDPFDGAYMASMQSTLDELGSYMLDHAERRR  
AKPGDDLISALAHAEIDGERLNDREIRNFAILLTLAGHITTTALLGNTLL  
ALGERQDIMLRWRQGQVDTAILLEEVLRHRTPFTEVYRFTTTEVTIGNQV  
VPGDQLRLWIASGNRDERQFADPDFTFVLGRDSKHLGFGGLGIHYCLGASL  
ARMESVVVLGLLAERTTSLVPAVEALSYYDAPGIFCLRSLPVSYRRT

>CYP163B18 (2515695381) *Salinispora pacifica* CNT569

LTRTIDLADPATFATHDLTNFWQRLRDEEPIYWNPPGTGRRGFVWLSRHA  
DILEVYRDDINFTSERGNVLVTLLAGGDAGAGRMLAVTDGPRHAELRKLL  
LRALGPRVLGPVCSAVRTNTRQMIGEAAAASGECDFATDVASRIPMITISN  
LLGVPEADRAALLKMTKTALSADDESSETESEVARSEILLYFQDLVEFR  
RKKPGEDVVSMLVNSSIDGVPLSDDDVVLNCYSLIIGGDETSRLTMIDSI  
YTLAANPEQWMRLKGGRCIDKAVDEVLRWASPSMHFGRTAVRETDIHGE  
WIRVDDIVTLWHASGNRDERAFSQPEVFDLGRAPNRHLSFGHGPHYCIGS  
YLAKVEISELLMALRDLTRGFEIIGEPQIRSNLLTGFTSTMPVRFVSA

>CYP1005A6 (2515695537) *Salinispora pacifica* CNT569

VSGVLFRSWTKTAGTHWPAVTRVADRQGTTEHLLVTQHALVRQVLTQVQTY  
RPDNALDAVTPIPVAAALRVLAGHHFRLPPTLANNGGVSHPAIRALVADAL  
HPAKVAAQRPWLTGLVAERVAAIRATLDAGGSADLHADLSADLPLLVLAR  
LVELPDAPVSAVKQFARAALFLWAPLDADRQLALADEVGRFHQVLRIFA  
DTGGGLAAALRAIGHPPDVLVGALFFLLVAGQETTSQFLTLLHRLAGEP

TVRAALRDGIVSVTNVVEEGLRLEPPIVTWRRVAAADSTLGGIAVPAGTS  
MLLWLARAGRDP AIVPAPDEF R PGRGSRRLHAFGAGAHRC LGDQLARME  
AAVVVEQVTPLLDGVTVV RAPWYPDNLTFRMPDAFVIRR

>CYP107AY3 (2515695857) *Salinispora pacifica* CNT569

MSQDQPTRAELAPIPRSGAQLGQEYDEFNAGDVHQVLLPDSSLAWLVTN  
PELVSRALADPRLALNRRHSQGGWSGFALPPALDANLLNLDAPDHTRLRR  
LVGPAFSPQRVAALRPRI RRTAEHL LDILVATTD PVDLVTGYCTPLSVRV  
IADLMGVPEAGRADLR TWTDTMLTSYPPDRAAIRQAVVELHGYVVS LIAA  
KQQQPGDDLLSVLATIEQDGDRLTRDELTS LAF LILFAGYENTANLIAST  
VLRLLDHGGIRDVRVPAAIEETLRLEPPAPAAVRRFPTEEMTIGGATIPA  
GDTVLLSIAAATRGADGSTTR LAFGNGPHFCLGAALARVEAEEALTVLAR  
RLPGLALAVPVAQVRWRPTFRTHGPAELLVTW

>CYP105AB25 (2515696255) *Salinispora pacifica* CNT569

VPASGDLADVEFPVARGCPFSTPAEYEQIREHSPITKVRLTNGGDAWWIA  
GHELGRAVLADRRFSSDRRRDNFPFVSTD PETRKQLQDQPTSMLGMDGAE  
HAQARRALMGFTVRRMAGLRPRIQQIVDQHIDEMLSSEQRSADLVEALS  
LPVPSLVICELLGV PYADHDF FQAHSGLVRHNT PPEVRARIQRELNTYL  
GALIDRKVTDPTDDLGRQIAKQRAAGTFDR TSLVSM AFLLLIAGHETTA  
NMISLGVVGLLQNP DQLAMIKEDPEKTPPAVEELLRYFTIADTVTARVAT  
EDVQLGGTTINAGDGVVISGLAADHDPTVFTDPDRIDLERGARHHVAFGF  
GPHQCIGQTLARMELQIVFDTLFRRIPTLR LAAPLDDIPFKSDAFVYGAE  
KLPVAW

>CYP113X1 (2515697180) *Salinispora pacifica* CNT569

VTTSETTIPQP NVNDAAIYPWYRMMRDEHPVRRDPVTGWV VYRYDDAR  
HVLTNPQIF SSEMHRMGYPESGLESLPQMDPPRHTRVRRI LGTAFTPHSI  
GEFEPLIVRITNEVIDGFVDKDRVDFVAELAYTVPIAVILEVLGLPSEDR  
VHFYDWARRVMDVTPEQMAQEGYAESLFDMQQDAVSYLREKVHERRGKAG  
DDMLTRLANAQLDGD TLTDD ETANFANVMFAGGHISTMTIANTIDL LDM  
NGQAQRDVRDNPSLLPQAIEEVLRRHPPI TTGLRGSTRDVELGGVTIPKH  
QYVAASFCSANRDERQFTHPDAFDIHRAGEVRHFGFGFGTHHCIGNALGR  
LETRLVVRTLHERFKKITVDRDGEVAWAKPPQMVG YDKLPVVLQPA

>CYP107Q4 (2561682127) *Salinispora arenicola* CNH643

MTTTAETS AETIDLF SPEVVADPFGWYARLREETGPTTGT LNIGTMMGGP  
EMWLVTTRYEDVRQVLTDP RFLTNPPADSPLEDIRAGVFKRLDFPPDLIPW  
MANLLNVSDGEDHTRLRKLVS YALTAHRIGKLRPRVEKITADLLDKLAED  
GKDGSPVDLVEEYCYPLPVTVICELVGIDEPDRPHWRAGDSMATMNGER  
IPTTLVKCIELARELIAKRRAEPQDDLVTALVQAQAE DQNRVSDDEIIGI  
LFSLVTAGHQTTTYLIGNSVILLLENPDQLARLKENPSMWPQAVRELQRL  
GPIQFAQPRFPSEDIELGGVTIPRGAPVAP LLLAANTDPRRFPDPNKLI I  
DRLAVGSEHGLGFGKGIHRCLGQHLAYQEA E VALQGLFTRFPDLSLAVPR  
EEIPWILRPGFTRTRTLPLKLV

>CYP105G5 (2561682128) *Salinispora arenicola* CNH643

LTIIETTETPPADDSLRAPLPRQFMQRDDPSKLPPALAA LAEQSPVGRSTL  
PDGDPFWMVSGYDEARAVLS DPRFSSDRFRYHPRFKKLSGQLGERLRNDK  
ARAGSFINMDPPEHTRYRKLLTGQFTVRRMRQLTVRIEQIVTEQVDVMLA  
EGNSADLVSAFAVPVPSLMICELLGVRYEDRTEFQRR AAGLLQTDLP IKQ  
AVENLEAQRAFMQRLVTDKR RTPADDMISGLVHHAGAEPPLTDDELVGIA

TLLLFAGLDTTASMLGLGMFMLLQRPEQMAVLRDDPSRIGDAVEELLRYL  
TVVSTGLFRFAKEDVVLGDEHYPAGSTVVVSLMAANRDGRHWPEPETLDV  
TRVRSSHLAFGHGVHQCLGQQRLARIELTVGITELLRRLPNVRLAVPPADV  
PLRNDMITYGVHRLPILWDTP

>CYP1051A1 (2561682149) *Salinispora arenicola* CNH643

MATDAAITRARTVPAWKALPAAVRDTHRALVDVGNWSDGDVVRVSLGVSR  
PYLVTNPAHVQEVLHERAAIYPRGDDTALWRSVRKLVGDGILAEGDAWAA  
SRRVLAPMFRPARINAMVDTMADAIAAGVDGLHGAATAGTPIIDVGRELSR  
IVCSAIMRVFFADRI TVRDALRIMKAQETIVTAMAPRILAPLVPWWIPMP  
GDRRFRAAVRSIDDI LPPVLRQAQRQPDDGDDLLSRLVRARADDGQALSE  
KMRDDLVSMVAVTTETSTVVLTWLVPLLANHPDVANRLYDEIDRVVGGG  
PVRGDHLAELTYTRMVLDELLRLYPAGWILPRRAATTDVLGGVRINKGAT  
VILSPYVTQRMATAWWGPTAEAFDPERFAAGREAADGRHRYAYYPFGVGMH  
RCLGEHLFNLEAILIVATLLSRFRFALTDTSMPGVKVAASRTPARTVEMV  
LKPVPAPVPAR

>CYP1005A1 (2561682378) *Salinispora arenicola* CNH643

VSAVLFRSWTKTAGTRWPDVTRVADQSGTEHLVVTRHALVRQVLTQATY  
RPDNALAEAVTPVPVAALRVLAGHRFRLPPTLANNGGASHPAIRALVADAL  
HPTKVAAQRFPWLTGLVADRVATIRTTLDSSGGPVDLYADLTADLPLLVLAR  
LVELPDAPVNAVKKQFARAALFELFWAPLDADRQLALADEVGRFHQVLRFA  
DTGGGLAAALRATGHSPDVLVGALFFLLVAGQETTSQFLTLLHRSVSGEP  
TIRAALRAGSSSVADVVEEGLRLEPPIVTVRRVAAVDSTLGGTTVAAGTS  
VLLWLRAGRDPAVVAAPDEFPRPGQRGSRRLAFGAGAHRCCLGDQLARME  
AAVVVEQATPLLDGVTTVVRPPWYPDNLTFRMPDAFVVR

>CYP105AB8 (2561682543) *Salinispora arenicola* CNH643

MTETASSRLTDTEFPVQRECPFAEPVEYEQIREQSSIAMVRLTGGGEAWW  
ISGHEQGRAVLADRRFSSDRKANFPFVSTDPAIRKRLHAQPLSLISMDG  
AEHTQARRALIGEFTVRRLAALRPRIQQIVDQCIDEMLTTDQHCADLVKT  
LSLPVPSLVICELLGVPYADHDFEQEHTATLVRRNTASEVRQHSIDELNA  
YLGALIDRKLASPDLLGRQIARQHRDGTFRSSMVSLAFLLLVAGHET  
TANMISLGVVGLLQHPEQLAMIKDDPKTPLAIEELLRFFTIVDSVTSRV  
ATEDVRFQDGTINAGDGVVVSGLSADWDPTVFADPDRLDLERGARHHLAF  
GFGPHQCLGQNLARLELQIVFDTLFHRIPTRLRLAAPLDKIPFKTDAAIYG  
ARELPVAV

>CYP211C1 (2561682649) *Salinispora arenicola* CNH643

VVDVEELLTRYSAQGRQDPFPVYADLHAQGPIAALPPEPERRRVA AVAV  
GYDLVGAVLRDPEWSKAPPPGWTEQEILRTLQTSMMFINPPDHGRMRHVF  
AGTFTPRRLGALEPVVNRVADELDRMADAGAGGLDFVAEFAYPLPARVM  
AEFIGIPETELDWYRERVDVIDAFLDVAGKTPQRLAAANAAGAE LRAFYG  
ELLARRRRTPGEDLISGLVEAVDAGGVELTEDELVSNLIVLFNASFVTTV  
YMLSNGLPVLLAHPEVAAAALATDPVLTAGAVDEILRLQAPVHLLARAAPR  
DTVLGGVPI PQGQNVLLLLIAAANRDP AHFPDPDRFDPWRSGPPSLAFGLG  
LHYCLGAAVSRLEGRALPRLLSRFPRLRIMEQPVYSGSLFLRGIDKLSV  
SPGEGSTRE

>CYP208A12 (2561682790) *Salinispora arenicola* CNH643

MTLDTITPRVPLGPPRTAALRMLLVMKRDRLGMLTSAAARYGDASRLPVG  
HKALWFFNHPRYAKHVVLADNSANYHKGIGLVHARRALGDGLLTSEGDLWR  
KQRKVIQPAFQSRRIAQQAGMIAEEAFALVERLRARAGAGPVELTAEITG  
LTLGVLGRSLLDADLAGFDSIGDSFATVQDQAMFELETNAVPMWIPLPR  
QIRFRRARRKLQAVVDTLVDGRAGNLADRVDVLSRLILSARGEADPRVGR  
ERLRDELVTLLLAGHETTASTLGWTLSLIDRHPGVWERLHAEAVEVLGDR  
LPEYDDLRLRLRYTVMVVEEAMRLFPPVWLLPRRALAPDTIGEYRVANAD  
VVISPYTLHRHPEFWPNPERFDPERFAPGQAADRPRYAYLPFGAGPRFCV  
GNNLGMMEAVFVIALLCRHLRLTGVPGHRLVPEPMLSLRIRGGLPLVVRP  
VS

>CYP211B2 (2561683539) *Salinispora arenicola* CNH643

MDVSEAI AVLISPSGRLDPYPTYEQ LRAHGPVSQTTAGLFVVTGYAEADM  
VLRDPRFVVLDDDLRDDVFPHWQDSPAIKSIARSMLRTNPPDHSRIRRLA  
AGAFTPRRVAAMREVVTQADELVDDEMIRAGRDGARVDFMDMFAYPLPVA  
VICALLGVPAADRSRFRRWAGDLTGILEPEITPEELAGADAGADELRDYF  
TGLIEQRRRAPADDLTALVQAHDADGDRLSGEELLANLVVLLVAGFETT  
TNLLGNGLVVLLTRPEAAAAALRDEPDLAPGYVDELLRYDSPVQLTTRTVR  
ESVSFAGTELPAWSWLLVLLGAANRDPRRFPDPARFDPGRAQSQPLSFGA  
GPHYCLGAGLARLEAQVAFPLLLRRLPELALAGRPSRRTRLTLRGYETLP  
ITVGAVTADRGTAGVAPGTP

>CYP244A4 (2561684171) *Salinispora arenicola* CNH643

MSTTTNTELTEAPETNMPVDPGLFDCMPDLIAAARVAPVVRIPYLGRIHAW  
VVCDELVKQALTHPKMGKDIALVPEWMRQPGLMVTAQPDPEYARAMIMS  
DGENHARIRRIHAPVLSRPNTERWGERVADKVEGFDELDSRAGSGGSTEV  
NVVTNYTHKIPLAFISEMLGLPPEAEHRLRGITDIMLYSSDYAARREAIG  
GLFGAVEDWVRNPADLRDGVITGLLAASDGPDAAVTEGEVIVWTLGMIIT  
GYETTGSLISTSLYEAIRRPPHERPKTDEDITAWIEETLRVHPPFPHTW  
RFPLEDIELGGYLIPKGAQVQVSI A AANRKPGE GADSFDAERRGHGHL SF  
GLGMHYCIGAPLVRLEAQIAVRGFLRRFPQARLSAETAVQWESEWMIRRM  
SVLPAVLS

>CYP245A7 (2561684175) *Salinispora arenicola* CNH643

MPSATLPRFALTGWSRENIVNPYPVYQRYREVASVHRGEPGGDAPDTFYV  
FSYDEVVQVLSSNCFGRGRSLDAAKASVPVPAEQKALRAIVENWLVMFMDP  
PRHTELRSLLNRSFSFPRIVTELPRPRIARIAQELL SRLGQQVDVDLVESFA  
APLPILVISELLGIPEERRAWLRANALALQEASSSRAGRDVDGYARA EVA  
AQEFTEYFREQVRLRRGRAGGDLITILANAQERGAPVSLDAIVGTCVHLL  
TAGHETTTNSLAKAVLALREHPAVLDELGAEGLTDDAVEEF LRYDPPVQ  
AVTRWAHQD T T LGGCDIPGRSRVVAL LGSANRDPARFPSPDVLDVRRPAD  
RHLSFGLGIHYCLGATLARA ELEIGLQALLDGVP T L GYGTQHVDYADDLV  
FHGPSRLVLVNLGERCT

>CYP105CP2 (2561684339) *Salinispora arenicola* CNH643

MTKSMPVQDLPAFPPIPRECYPYRPSAQHVSLRSGGPMKVRLYNGRTAWLV  
TDSA HARAVLS DYRRVSIKPYHGNYPLLN EEF EKVVDSGYADVLFGVDPP  
EHTRQRQMIMPSFTLRR TAVLRPDIQRIVDDKLDEM MRHGAPGDLVTEFA  
QPVP SMVISFLLGV PWEDHEEFETPAHKLFVPELAEEATTEL GAYLERLI  
QKKEQPGGTGGTGLLDD LIRDHLRAGALS RDELVHIAMAMLVAGTDTT  
NVISLGT LALLDNPDQWAALRDNPD ELIPGAVEEILRYTSLIEAFARVAV  
SDIELNGAVIKEGEGILISSAGVNFDPALAPDPGRFDIRRP RPSPSFSFSH

GIHRCPGDNLARLELEIAFRSLVTRMPNLRRTAKPIDQIPSNNDGTLQRL  
YELPVVW

>CYP105CN1 (2561684341) *Salinispora arenicola* CNH643

MAAPAPQATPSTTPHPPSYPLPRECPYRPSAGTAHLRDAGPVSTVRLYDG  
RTAWLVTGAAEARALLADSRVSNRADFPNYPVMDERHLSMRATREMAREE  
EGGFAAALFGMDPPEHTRQRQLLLPRFTVRQVAARRPAIQIRIVDEHLDAM  
EANGSPADLVSAFATPVPTMVVCTHLGVPHYQDRTRFEPVAVAGLFEPDRAD  
AAMAELTAYLHQLIETKQSEPGDGVIDHLIANHLRPGAIDRAELVAIASA  
ILVAGTVTTSSAIALGTLALLTAPGQYTALVDNPDLPVPGAVNEILRYLSL  
VEQLARVATEDIEIGGKLIRAGDGIIVSFAAGNLDPNVTTTHPDRLDVALP  
PTNHLAFSHGIHHCIGQNLALLELDIAFRALVSRFPTLRLAVPAEQQLPTY  
FAGDVPRLACLPVTW

>CYP107FS2 (2561684342) *Salinispora arenicola* CNH643

MPVPQGEQNLTTTEVFADPKALFATLGSRQPLHRISLPDGMFAVLVTGNRE  
ARQALSDPRLVRSITAAAPELHXYHPLASDDYALSRHMLFADPPDHGRMR  
KLVSTAFTRRRVEQMRPRIQQITDDDLIDVIAAKGEADLVETLALPLPIAV  
ISEMLGVFPFADRSEFERHAEVLGTINASSGFDIAAAGRWFDEYLAGLVQ  
QRRREPQDDLISGMLAAQDKGDRLLTDVELRSNALLLSAGFETTVNLIAN  
GLLALLRHPEAAMALRSEPNLMTTAVDELRLYDSPVSCVTYHFAQEPVEI  
GGFEIRSGEHVVIAAAAANHDPTVFAAPSRLDLRREGSGQILSFSGIHF  
CLGAPLARLEGEIAFGTVLRRLAGRLAVPTDSLIVWKASFVLHRLRLPV  
TFTPDRDPNPIDSVHTV

>CYP125G6 (2561684380) *Salinispora arenicola* CNH643

VPTLLNEHVSYDGAIAIVDSDGATSWIRLAERVNRVHLLRAHGLDTGD  
RLACVTGNRRETFEVLLAALHTGVTVVPVNWHLTVTEIGHILSDSGSRVV  
ITEELHVKAFAAAADGTAGPVAGLVLDREVEGFAAVEPLLAASPAEPE  
GQVCGATMLYTSGETTGRPKGVVNNLFVTGAPYARVGRLCDYARSVLGVPR  
RERMLLDGPWYHSSQLFFALLSLQGSRLVIRPYFDPAATLKTIDDHRIT  
VTHLVPTQLVRLLRVDALTRQMFSGASLRRVWHGGGCPPEVKRSMIDWW  
GPVLVEYYGATEGGVVTLIDSAEWLARPGSVGRAVPPSEVVVVDDGGQPV  
AAGQTGQVFFRRRTGNRFHYHNAPEKTQAAYLAPDTFTTYGEVGHVDEDGY  
LFLTGRAQDMIVSGGVNVYPAEVEAALLRHPVVRDAAVIGVADDEFGERV  
VGIVVPETAVDPDLLTTHLDAHCRVSLAGFKVPRTYRVVESLPRDETGKL  
RKDALRSKFGWLSGAAMTVPRPATGQPTAHRPDIAHPTTYVSGVPHDEFA  
RRRRDEPVGWAEPLVTRHTAAGRTATRGSGFWAVTRYEDVVAASRRVTD  
FSSAAKGAFLLTDPRTPADLQQARQLLVNMDDPHHARLRKLVTSVFTPRAV  
RGLLASIDAHAAALVAKVVAAGEFDVVTDLAAELPLLVLADLLGVPKQDR  
ALLYGWSNHLVGFDPDFGGGDIDAYRTAMAEAFQYALNLGVERRARPTD  
DLVSLLANAEVDGTRLTDREFCNFWLLLVVAGNETTRHLVAGTMQALTEH  
PGECARLVEGRVPMESAVEELLRWVTPIMQFRRTATRDTEIGGQAVTAGE  
KVVLYYTSANRDATVFAEPDRLDLGRTPNRQLSFGIGPHYCLGAHLARAE  
LTALLRVMSPHLGSLQLTGFPVSRLASNFVNGVKAMPAVIGSR

>CYP154M15 (2561684405) *Salinispora arenicola* CNH643

MNDKCPFAALDVTGQDLHGEEARLREQGPAVLVELPGGVKAWSINRYEVI  
RELLMDRRVTKNARKHWPFAFIKGEIPPDWEMISWVAMDNMVTAYGKDHVR  
LRKLVGRAFTQRRADALRPQVVALSTKLLDDLGTATPPGEVVDLRERFAYP  
LPAMLVASLIGMSEAAALACSKVIDMMVHTNVSPEEAQAVLRGWRAAMAD  
LIESKRRTPGEDITTDLIAAREEDGSRLSEAELADTIFAILGAGSETTIN  
FFDNAITALLSRPGQLQLLRTGGVTWDDVIDEVLRVESPLAHLPLRYAVE



DIELDGVITIPQGDPILVNYAAAGRDPALHGGTADEFDLARGDKTHLSFGY  
GPHYCLGAGIARMVATIGLSMLFERFPDLSLAVPVTELKRLPTFIMNGHQ  
TLPVRLTAHAR

>CYP125A41 (2561684458) *Salinispora arenicola* CNH643

MTEPRIPAGFDFTDPEVLAHRVPREEFAELRRTAPVWWNAQPRGSAGFDD  
DGYWVVTRYADVMTVSRDSDTYSTRENTAIARLRPDTTREDIEMQRVIML  
NVDPPPEHTKLRAIVSRGFTPRAINALRGSLAERAHEHIVRDAAVRGVGVDFV  
TDVACELPLQAI AELIGVPQHHRKVFWDWSNQLIGYDDPAYGTDPLTASA  
ELLAYAMEMAEERQSRSPSDDLVTKLVNAQIDGHELTTFDEFGFFVMLLAVA  
GNETTRNAITHGMVAFLDNPEQWELFKAERP KSAVEEII RWATPVNVFQR  
TALVDTV LGGQAISAGQRVALFYGSANFDEAVFEDPERFDITRSPNPHLG  
FGGSGAHFCLGANLARLEIELIFNSIADHLPDIRKVAAPQRLRSGWINGI  
RQMPVRYR

>CYP166A4 (2561684603) *Salinispora arenicola* CNH643

MTDAISFELPWARTDKFDPPAVFDALREQRPLARMRYPDGHVGWIVSSYE  
LVREVLGDPRFSHSCAVGHFPVTHQGGV IPTHQP IPGMFIHMDPPEHTRY  
RRLLTGEFTVRRSRLTGHEGVATEQIEVMREHGAPADLVATFARPLVL  
RVLSGLVGLPYGERDRYLHAVTLLHDAEADPAEAAAAAYEQAGAYFDEVIE  
RRRRQPEDDLISTLVGDGELTGEELRNIVTLLLFAGYETTESALAVGMFA  
LLHHEDQLARLRADPTKIDAAIEELLRYLTVNQYHTYRTASEDIELHGEV  
INKGDSVTVSLPAANRDPARFACPAELDIDRETSGHVAFGFGI HQCLGQN  
LARVELRAGLSALLRAFPNRLRLAVPADEVPLRLQGSVFAVKNLPVCW

>CYP105BL2 (2561684794) *Salinispora arenicola* CNH643

MSSHSAAAPDPETATPLHTLAPELAFFPQFERSAPFDPPQAYTELSGRCPV  
APVSMADGKPSWLITSFEGVRTTSLDPHFSSDM SHPGFPNRTGKPVDDL  
KDTLGAMDGERHRYRRLMTGELTVRRAKAMRPVITQITDEALDQLAAAG  
PGADLVKHVAFVVP SRVACHLVG IPLSDYELFTGMAATLMDSTSSDDQFA  
ALQNMVSYFDTLVT DREHHRDDLLGHMVRRYLATGELTRDMLIRLAWTT  
MAAGQETTAHMI GLGVAALLRHPDQLELLRREPHLLPGAVDELMRYLPLI  
QFGIPRVAMDDVEVDGQTVTAGEGVVALPPLANRDP AVFERPDELDVRRN  
ARQHLTFGY GPHQCPAHALARLELEVYGRLLERFPTLRLADSDADLKVQ  
DKDIMYRVSELAVTW

>CYP107AX14P (2561685053) *Salinispora arenicola* CNH643

VTSPPHVAFGHLLLRDPHGQYNALRGQAPVHHIRTPDGAPAWLVMRYHDV  
QAALTDLRLSVDKRFSDTDGEHGSSLPPELDAHLLNRDPPDHTRLRLRLAA  
AAFTPRRVADQAPAVATIVDALLDGIADQDQAELIGALASPLPLQVMHEL  
LGLPTQTSVDFRNWTNTLLSADANQPAQSRSAMATMRRFLMGQLARKRAQ  
PGDDLLTGLLAARDDDDRFTDDELLAMVFLLMFAGYDNTAALIGNVTHAL  
LTDAGLHDAVRAGSVDLDSVVDEVLRWNPSFPLAVRRFAREPVTPSRQAI  
ASGSAWPARTATPHSSPNPTN

>CYP107EU1 (2561685738) *Salinispora arenicola* CNH643

VTIGQTL PDLVYSPEFTRDPY AIFARLREQAPVCRVTTHRGMSAWMVTRH  
ADVRALLADNRLAKDGNRIGELIPRHSTLTGAATGFPPGLTTNMVNSDPP  
DHTRLRHLVGREFTGHRVEGLRPRIEEIVDDL LDGVAACGDEADLAETLA  
RRLPIAVIGELLGVPEADRAEFFRWADTLYGGTASPEALGQAYNAIVDYL

GRLCDAKRDPADDDLLTALVQVSADEDRLSREELVSMALLLLLVAGHETTS  
KQISNGVLALLLNPEQLKLLKAQPARTAGAVEELLRFEGPSLSASLRFTT  
EPVEVAGVVIPEGEFVLLSLASGNRDPEKFPDPDRLDITRSTQGNLAMGH  
GIHHCVGAALARLELEIVLIRLVARFPQMQLAVEADDLEWLVNSFFRAPL  
HLPVSLRR

>CYP162P1 (2561686046) *Salinispora arenicola* CNH643

MGLPSEVDLADPDLYAEGDPDAEWAWLRAHRPVYRNPAGATAEFWALTRY  
RDALQVYRDPSTFSSERGMVLGVDPVAGDPAAGRMLVVTDPPRHPKLRI  
VSGIFVPRTMHRLEGRVRSLLVDQLLHRVVDGAGRCDFVNDVAARLPVAII  
CELLGVPADEQDWMYHLTSTAFGGGDPAGSAEVSaveraEAYGDILLYYG  
ELAAERRRRPGDDLVTLLVHADLDGEPLDVEDVLVNCTNLIIGGNETTRH  
AASGGLLALAQRPELWRRLRETPTAVPTAVEEVLRWTTPGMHVLRATRD  
TEIGGVPIRAGERVVVWNAANRDEDVFADPQRFIDRSPNRHIAFGQGG  
HHCLGAALARLELTILFEEMAKQVTNVRLTGPFVRRVRSVLRGIRALPVE  
LVT

>CYP154M21 (2561686133) *Salinispora arenicola* CNH643

MEKCPYVLDRAGSDIHKEASNLARGPVTLVELHGGYTAWSVTSYEVAKQ  
LLMDPRISKNTKAHWPEFRDGNVPQDWELYTWVAMDNMQTRDGKEHDLRL  
KLVAFAFTGRQAVKSRPIIEEIVNRLDDLETA PRGQAVDIKARYFYPLS  
TILVCDLLGIAEEDRDVILHGNVNSKTTNTAESEANLHQWQTALGRLV  
ETKRDPGDDLTTVIIKAGEDEQTPLTDDEVIGSLHLLIGGGTETTANVL  
CHTVVMDMLTHPDQLAMVRSGAVSWESAWEVEVRKDGAVGSMFRCATDDV  
EIGGVTTIAKGDVLVINYAAAGRDPERYGDAAAEFDITRADKANLSFGYGR  
HRCCLGPALATMEAMVALPALFDRFPNLALAVPPNELKPKQGTFFNGYAEV  
PLLLRS

>CYP154M13 (2561686134) *Salinispora arenicola* CNH643

MSTGRPVVLDPTGRDIHGADHLRALGPATLVELPGGVLAWSINSYEVGK  
ALLSAPNVSKSARRHWPAYNGEIPPDWEMISWVAMDNISTTFGGDHRRL  
RRLTAKAFGSRRAEQVRPMATHMVNTLLDRMADAADAGEVVDLKAAFAYP  
LPGMLVAELIGMSEEARVAAAKVIDMMTATNITPEQAQGVLLGWRDAITD  
LIAALKRAQPGDDITSDLIAARDEDGSLLTEQELVDITIFAILGAGSETTIN  
FFDNAITQLLTHPEQLELVKSGQVSWDDVIEEVLRLSPLASLPMRFAVE  
DIQLDGVTIHRGDPILINYAALGRDPALHGESAGVFDVTRQHKEHLSFGH  
GAHYCLGAGIARMVAKTGLSALFERFPRMTLAVSATDLVPYPTFIMNGNR  
QLPVHLSGALTWREGEQSALGRA

>CYP105W2 (2561686147) *Salinispora arenicola* CNH643

MTGYQDRPTGDQPGAPVPSGSTDPGIGAFPLPRRCFPSPPAEYARLRAEH  
PVVRLPMLGGDTAWVVS RHADVRQVLS DPRMSADRRRPGFPKFAPTTEGQ  
RQASFANFRPPLNWLDPP EHAICRRQIVDEF SVRRVRQSRALVERVVDTH  
LDALTAAPGADLVSTFAYPVPSQVICEVLGVPHYGEHEFFERRSTLMFRR  
STPADERARCAREIRDFLDVVVTDKEHRPGDDVLSRLLYRQRRAGGVDHE  
AVVSMAFVLLVAGHVTTSNMLALSVLALLTHPARLARLRAEPPERFPAAVE  
ELLRYFTVVEAATARTATAEVTIGGVTTIAAGEGVVALGQAANRDP RVFEH  
PDEFDPDRDARAHAFGHGRHICPGQHLARLEMEVALSRLFRRLPGLRLT  
MEVSDLPLKEDSNIFGLYALPVAW

>CYP248A2 (2561686155) *Salinispora arenicola* CNH643

VLADAVTAFDPTAVDVRRDPYPSYHWLLRHDPVHRGAHQVWYVSRFADVR

AVLGDERFARTGIRRFWTDLVGPGLLSQIVGDIILFQDEPDHGRLRGVVG  
PAFSPSALRRLEPTIEATVNDLLRPARALGAMDVVADLAYPLALRAVLEL  
LGLPAGDANAVGRWSRAVGRTLDRGATAEDMRRGHAAIAEFADYVERALA  
ERREDGADLLALMLAAHRSQLMSRNEIVSTVVTFIFTGHETVASQLGNGL  
LSLLDHPEQLELVRRQPHLVPAVEECLRFDPVQSNTRQLAADVELHGR  
RLRRDDVVVVLAGAANRDPGRYDRPDELDIRRDPVPSMSFGAGMRYCLGS  
YLARLQLRTALGAMVALPDLRLVCNPNELAYQPRTMFRGLTRLPVAFTPA  
G

>CYP154M20 (2561686177) *Salinispora arenicola* CNH643

MERCPYVLDRAGRDLHGAEAKALRARGPVTLVELHGGYTAWSVTSYEIAKQ  
LLVDPRIKNTKETWPEFREGKVPQDWELYTWVAMDNMQTRDGEEHDRLR  
KLVAQAFTTTRQVAKVRPMIEDIVHRLDDLEKVPAGEVVDIKGRYFYPLS  
TILVCDLLGIPEADRAEALHGTVVNARTTNSAESEANLHQWSALSCLV  
ETKRREPGNDITTLIIKAREDEQAPLTDDEVIGSLHLLIGGGTETTSNVL  
CNTLIDLTLHPDQMAMIRSGAVGWEAAWEEVEVRKDGAVGSMPPFCANADI  
EIGGVTTIAKGDVLVLINAAAAGRDPERYGDTTAEFDITRADKTNLSFGYGR  
HRCLGPALATMEAMISLPALFERFPDLVLAVPRDELKPKQGTFFVNGYAEV  
PMLLRS

>CYP107FJ2 (2561686184) *Salinispora arenicola* CNH643

MSETLSTSVLLADAAEQRAWRAKLRGAGPVHRITTSGETGWLIVGHEEA  
RNALVDLRLQGRTATVGHGRMPEDLERALNSHMLNVGPPDHTRLRRLVS  
AAFTRRRIEQMRPRIQELTDELLDGLAGADEADLVAGLALPLPMRVLVDL  
FGIPAEDCADFNVWTKVLTSAGAVDLDRLTTAAGEMVAYLRGLLDRKRQV  
PESDLLSALVAVRDGADRLSDDELTSMVYLLLTAGYETTVNLIGNGLLNL  
LANPEQLVAFKADPDLLPQVVEEAMRFDSPVQIAVRHSTEPVEIAGQAIP  
SGALILVSLWANRDPDRFTEPEVFRVDRQDNPQLGFGYGFHHHCIGAPLA  
RMEGTVAIGTVIRRFAPALRLAHPASSLTWRASMVMHGLTALPVHLR

>CYP105CH1 (2561686466) *Salinispora arenicola* CNH643

VSSLPLPTYPKLRDPADPLLPAPAEYLAIQSEKPIAKVLLPSGRPTWLITG  
HALARQVLTEPCVSVDRRHPPNFYPVPNPDAVVAQVARWTYILLGDDPPL  
HTERRRLLI SEFTVRQAQAMRPRIQQLVDFHLEQLIAAGPGADF SKHFAM  
KVPSAVICEMLGVPFADHDYFQERTALQLRRDVPVAAQKQAIDELLAYFE  
QLIQEKSSHPGDDVLSRLIVSNRETEAFDHEALVALGLLLLLVGGHETTAN  
TLTLATATMLERPEIAEQLRDPSLMPSAVEEFLRYFSVAVAVSRIATAD  
LQVGGQLVRAGESMLLVNLTIARDGTVFPEPHRLDIRRNARNHLAFSHGI  
HOCMGQNLARVEMQIALDTVLRRLPGLHLVTPFEELPFKYRHLVWGIEEL  
RVAW

>CYP107AY13 (2561686683) *Salinispora arenicola* CNH643

MTAELTPIPRSSARLGQEYDQLRKTDGVHQVLLPDASLAWLVTNPEVAAR  
ALADPRLALNRRNSRGGWSGFALPPALDANLLNLDAPDHTRLRRLVGPAP  
SPQ RVAALRPGIRRAAEHLDDTLVATSRPTDLVTGYCNPLSVQVIADLMG  
VPEAGRNLRAWTDMLTSYPPDRDAIRQAVTELHGYYVDLIDLKQQQPG  
EDLLSVLVTTIEQDGDRLTRDELTSALFLILFAGYENTANLIASAVLWLLD  
HGGLNVVPISEAIEATLRHEPPAPVAIRRFPTEDIIIGGVTI PAGDTVLL  
SIAAATRGADGNAARLAFNGNGPHYCLGAALARIEAEEALTVLARRLPGLT  
LAVPPAQVRWRPTFRTHGPAELLVGW

>CYP105J3 (2561686797) *Salinispora arenicola* CNH643

MTDSVAFPQGRVCPHQAPAGYRPLAVQRPLAQVTLYDGRRVWAVTTRDLA  
RRLLVDPRISSDRTPAWPAIVPIVAAVNDAAQQKVLKIATALVGTGPE  
HKAQRKMLIPSFTRRMNALRPMIQEIVDQQLDDEMIKSGAPTDLIPAFAS  
AVPVTVLYRLMGIPDDDHGIFEKLSHQLLAGPNANEAYDQLMGYMSRLIA  
ERRRNPGEGLVDDLLAQHGANDDADHDELVSTLVVQVAGNHGTTGSMIAL  
GLFALLQHPEQLAELRADPSLMPTAVDELLRFLSVPAVTRLAADDIEVE  
GTVIRKGDGVFFITSLINRDTDVHDAPNSLGWHHASAADHLTFGFGAHQC  
LGQSLARITMEIALGALIDRLPSRLAVPAEEVPFLPAASLQVIAELPIT  
W

>CYP1198B1 (2561687116) *Salinispora arenicola* CNH643

MSGELTDQRTAPGAGGNPLRSLMDHGIRANPYPLFGELREAGPTAVEDGS  
VVLFGHEYEHCSQILRHRDMGSDTSEAPSIKGFVVDDAERAGSSIFFMDQP  
GHGRQRKLVSFSFTPRIVKSFGPQITHIVDGLFEDFRDKGELDVVTDLAY  
PVSIGIICDLFGIPDDERDMLKEWSDDLALSTELPTLGAAIGVLNVFTRD  
EINRFGSVAMAAHAYFADLIHRRRKNPGDDLVSLLATESNGERLTRFEV  
TSVLATLFVAAHESTTNLISGGILALLRNQDQMAVLRENPGITNVVDES  
LRYDPPVHLAARMARARTTIGGYDLDPGTIVVVLMAAGNRDPAYENPDV  
FDVNRKIRNVSLAFGAGAHFCIGSGLAKLEAEIAISAFQRLKHPEVDES  
SLEYRRHIVVRGLEHMKVSFQP

>CYP125A41 (2519869361) *Salinispora arenicola* CNH962

MTEPRIPAGFDFTDPEVLAHRVPREEFAELRRTAPVWWNAQPRGSAGFDD  
DGYWVVTRYADVMTVSRSDTYSTRENTAIARLRPDTTREDIEMQRVIML  
NVDPPEHTKLRAIVSRGFTPRAINALRGSLAERAHIVRDAAVRGVGFV  
TDVACELPLQAI AELIGVPQHRRKVFWDWSNQLIGYDDPAYGTDPLTASA  
ELLAYAMEMAEERQRSPSDDLVTCLVNAQIDGEHLTTDEFGGFVMLLAVA  
GNETTRNAITHGMVAFLDNPEQWELFKAERP KSAVEEII RWATPVNVFQR  
TALVDTV LGGQAI SAGQRVALFYGSANFDEAVFEDPERFDITRSPNPHLG  
FGGSGAHFCLGANLARLEIELIFNSIADHLPDIRKVAAPQRLRSGWINGI  
RQMPVRYR

>CYP211C1 (2519869510) *Salinispora arenicola* CNH962

VVDVEELLTRLYSAQGRQDPFPVYADLHAQGPIAALPPEPERRRVA AVAV  
GYDLVGAVLRDPEWSKAPPPGWTEQEILRTLQTSMMFINPPDHGRMRHVF  
AGTFTPRRLGALEPVVNRVADELDRMADAGAGGLDFVAEFAYPLPARVM  
AEFIGIPETELDWYRERVVIDAFLDVAGKTPQRLAAANAAGAE LRAFYG  
ELLAHRRRTPGEDLISGLLEAVDAGGVELTEDELVSNLIVLFNASFVTTV  
YMLSNGLPVLLAHPEVAAALATDPVLTAGAVDEILRLQAPVHLLARAAPR  
DTV LGGVPI PQGQNVLLLLIAAANRDP AHFPDPDRFDP RRS GPPSLAFGLG  
LHYCLGA AVSRLEGR LALPRLLSRFPRLRIMEQPVYSGSLFLRGIDKLSV  
SPGEGSTRE

>CYP244A4 (2519869691) *Salinispora arenicola* CNH962

MSTTTNTELTEAPETNMPVDPGLFDCMPDLIAAARVAPVVRIPYLRHAW  
VVCDELVKQALTHPKMGKDIALVPEWMRQPGLMVT AQPDPEYARAMIMS  
DGENHARIRRIHAPVLSRPNTERWGERVADKVEGF LDEL SQAGSGGSTEV  
NVVTNYTHKIPLAFISEMLGLPPEAEHRLRGITDIMLYSSDYAARREAIG  
GLFGAVEDWVRNPADLRDGVITGLLAASDGPDAAVTEGEVIVWTLGMIIT  
GYETTGS LISTS LYEAI RPPHERPKTDEDITAWIEETLRVHPPFPHPPTW  
RFPLEDIELGGYLIPKGAPVQVSIAAANRKPGE GADSFDAERRGHGHL SF  
GLGMHYCIGAPLVRLEAQIAVRGFLRRFPQARLSAETAVQWESEWMIRRM

SVLPAVLS

>CYP245A7 (2519869695) *Salinispora arenicola* CNH962

MPSATLPRFALTGWSRENIVNPYPVYQRYREVASVHRGEPGGDAPDTFYV  
FSYDEVVQVLSSNCFGRGRSLDAAKASVPVPAEQKALRAIVENWLVMFMDP  
PRHTELRSLLNRSFSPRIVTELRPRIARIAQELLSRLGQQVDVDLVESFA  
APLPILVISELLGIPEERRAWLRANAMALQEASSSRAGRDDVDGYARAEVA  
AQEFTEYFREQVRLRRGRAGGDLITILANAQQRGAPVSLDAIVGTCVHLL  
TAGHETTNSLAKAVLALREHPAVLDELRGADGLTTDAVEEFLRYDPPVQ  
AVTRWAHQDITLGGYDIPRGSRVVALLGSANRDPARFPSPDVLVRRPAD  
RHLSFGLGIHYCLGATLARAELEIGLQALLDGVPTLGYGTQHVDYADDLV  
FHGPSRLVLVNLGERCK

>CYP211B2 (2519869797) *Salinispora arenicola* CNH962

MDVSEAVAVLISPSGRLDPYPTYEQRLAHGPVSRTTAGLFFVVTGYAADM  
VLRDPRFVVLLDDDLRDDVFPHWQDSPAIKSIARSMLRTNPPDHSRIRRLA  
AGAFTPRRVAAMREVVTQAQADELVDEMIRAGRDGARVDFMDMFAYPLPVA  
VICALLGVPAADRSRFRRWAGDLTGILEPEITPEELAGADAGADELRDYF  
TGLIEQRRRAPADDLTALVQAHDADGDRLSGEELLANLVVLLVAGFETT  
TNLLGNGLVLLTRPEAAAAALRDEPDLPAGYVDELLRYDSPVQLTTRTVR  
ESVSFAGTELPAGSWLLVLLGAANRDPRRFPDPARFDPWRAQSQPLSFGA  
GPHYCLGAGLARLEAQVAFPLLLRRLPELALAGRPSRRTRLTLRGYETLP  
ITVGAVTADRGTPAGVAPGTP

>CYP166A4 (2519870162) *Salinispora arenicola* CNH962

MTYAISFELPWARTDKFDPPAVFDALREQRPLARMRYPDGHVGVIVSSYE  
LVREVLGDPRFSHSCAVGHFPVTHQGQVIPTHPQIPGMFIHMDPPEHTRY  
RRLLTGEFTVRRTSRLTGHEGVATEQIEVMREHGAPADLVATFARPLVL  
RVLSGLVGLPYGERDRYLHAVTLLHDAEADPAEAAAAAYEQAGAYFDEVIE  
RRRRQPEDDLISTLVGDGELTGEELRNIVTLLLFAGYETTESALAVGMFA  
LLYHEDQLARLRADPTKIDAAIEELLRYLTVNQYHTYRTASEDIELHGEV  
INKGDSVTVSLPAANRDPARFACPADLDIDRETSGHVAFGFGIHCQLGQN  
LARVELRAGLSALLRAFPNLRRLAVPADEVPLRLQGSVFAVKNLPVCW

>CYP154M14 (2519870226) *Salinispora arenicola* CNH962

MRRRCPVVIDPAGTDIHAEGARIRTNGSVSQVELPGGVLAWSVTGQQAAR  
QVLSQRFQSKDPRKHWTDYLDGRIGQDFPLIGWVLMNLTAYGSDHSRL  
RKPCAQAFTPRRVQALRPAVERAAVELLDGLAMLSPTESVDLKARYTHPL  
PSRVICDLFGVPEEDRAEMLRGGEVNVDTRVSAEEEEANVERWHQQMLDF  
IANKRQNPGLDLSDLVAAQEANGSRLTDSEMVGTLHIMLATGTEPVKNL  
ITNAVFALLTHPDQLYLLRTGRAGWDDVIQETLRVQAPVAHLPPFRFAVED  
VEIDGVTIGRGDPLLNVFAAIGRDPEVHGETAAEFDITRADKEHLSFGQG  
VYRCIGQPLALLEAEVALRMLFQRFPNLMLAVPPEEVTPQPTFIMNGLDT  
LPVLLKECA

>CYP105BL2 (2519870579) *Salinispora arenicola* CNH962

MSSHSAAAPDPVTATPLHTLAPELTFPQFERSTPFDPPQAYTELSGRCPV  
APVSMADGKPSWLITSFEGVRTTSLSDPRFSSDMSHPGFNRTGKPVDDLL  
KDTLGAMDGERHRYRRLTGELTVRRAKAMRPVITRITDEALDQLAAAG  
PGADLVKHVAFVVPSPRVACHLVGIPLSDYELFTGMAATLMDSTSSDDQFA

ALQNMVSYFDTLVTDREHHDRDDLLGHMVRRYLATGELTRDMLIRLAWTT  
MAAGQETTAHMIIGLVAALLRHPDQLELLRREPHLLPGAVDELMRYLPLI  
QFGIPRVATDDVEVDGQTVTAGEGVVALPPLANRDPVFERPDELDVRRN  
ARQHLTFGYGPHQCPAHALARLELEVYGRLLERFPTLRLADSDADLKVQ  
DKDIMYRVSELAVTW

>CYP1005A1 (2519870845) *Salinispora arenicola* CNH962

MTAGTRWPDVTRVADQSGTEHLVVTRHALVRQVLTQATYRPDNAMEAVT  
PVPVAALRVLAGHRFRLLPPTLANNGGVSHPAIRALVADTLHPTKVAAQRP  
WLTGLVADRVATIRTTLDSGGPVDLYADLTADLPLLVLARLVELPDAPVN  
AVKQFARAALFLWAPLDADRQLALADEVGRFHQVLRREFADTGGGLAAAL  
RATGHSPDVLVGALFFLLVAGQETTSQFLTLLHLRLSSEPTIRAALRAGS  
ISVADVVEEGLRLEPPIVTVRRVAAVDSTLGGTTVAAGTSVLLWLARAGR  
DPAVVAAPDEFPRPGQRGRRLAFGAGAHRCCLGDQLARMEAAVVVEQATP  
LLDGVTVVRRPPWYPDNLTFRMPDAFVVRR

>CYP107FS2 (2519871038) *Salinispora arenicola* CNH962

MPVPQGEQNLTTTEVFADPKALFATLGSRQPLHRISLPDGMFAVLVTGNRE  
ARQALSDPRLVRSITAAAPELHKYHPLASDDYALSRHMLFADPPDHGRMR  
KLVSTAFTRRRVEQMRPRIQQITDDLIDVIAAKGEADLVETLALPLPIAV  
ISEMLGVFPFADRSEFERHAEVLTGINASSGFDALIAAGRWFDEYLAGLVQ  
QRRREPQDDLISGMLAAQDKGDRLTDVELRSNALLLSAGFETTNNLVAN  
GLLALLRHPEAMAALRSEPNLMTTAVDELRLRYDSPVSCVTYHFAQEPVEI  
GGFEIRSGEHVVIAAAANHDPTVVFADPSRLDLRREGSGQILSFSGIHF  
CLGAPLARLEGEIAFGTVLRRLAGRLAVPTDSLWVKASFVLHRLERLPV  
TFTPDRAPNPIDSVHTV

>CYP105CN1 (2519871039) *Salinispora arenicola* CNH962

MAAPAPQATQSTTPHPPSYPLPRECPYRPSAGTARLRDAGPVSTVRLYDG  
RTAWLVGTAAEARALLADSRVSNRADFPNYPVMDEHLSMRATREMAREE  
EGGFAAALFGMDPPEHTRQRLQLLPRFTVRQVAARRPAIQRIVDEHLDAM  
EANGSPADLVSAFATPVPTMVVCTHLGVQYQDRTRFEPVAVAGLFEPDRAD  
AAMAELTAYLHQLIETRQSEPGDGVIDHLIANHLRPGAIDRAELVAIASA  
ILVAGTVTTSSAIALGTLALLTAPGQYAALVDNPDLPVPGAVNEILRYLSL  
VEQLARVATEDIEIGGKLIRAGDGIIVSFAAGNLDPNVTTHPDRLDVALP  
PTNHLAFSHGIHHCIGQNALLELDIAFRALVSRFPTLRLAVPAEQLPY  
FAGDVPRLACLPVTW

>CYP105CP2 (2519871041) *Salinispora arenicola* CNH962

MTKSMPVQDLPAFPPIPRECPYRPSAQHVSLRSGGPMKVRLYNGRTAWLV  
TDSAHARAVLSDYRRVSIKPYHGNYPLLNEEFKVVDSGYADVLFVGDPP  
EHTRQRMIMPSFTLRRTAVLRPDIQRIVDDKLDMMRHGAPGDLVTEFA  
QPVPMSMVSFLLGVFWEDHEEFETPAHKLFVPELAEEATTELGAYLERLI  
QKKEQPGGTGGTGLLDDLRDHLRAGALSRDELVHIAMAMLVAGTDTTT  
NVISLGTALLDNDPDQWAALRDNPDDELIPGAVEEILRYTSLIEAFARVAV  
SDIELNGAVIKEGEGILISSAGVNFDPALAPDPGRFDIRPPRPSFSFSH  
GIHRCPGDNLARLELEIAFRSLVTRMPNLRATATPIDQIPSNNDGTLQRL  
YELPVVW

>CYP105J4 (2519871353) *Salinispora arenicola* CNH962

MTDSVAFFPQGRVCPHQFAPGYRPLAAQSRSLAQVTLYDGRRVWAVTTRDLA  
RRLLVDPRISSDRNTNPAWPAIVPIVAAAVNDAQQKVLRIATALVGTGPE

HKAQRRMLIPSFTRFRMNALRPMIQEIVDQQQLEMIKSGAPTDLIAPAFAS  
AVPVTVLRYRLMGIPDDDHGIFEKLSHQLLAGPHANEAYDQLMDYMSLVA  
ERRRNPGEGLVDDLLAQHGANDDDVDHDELVSTLVVQVAGNHGTTGSMIAL  
GLFALLQHPEQLAELRANPSLMPTAVDELLRFLSVPDVAVTRLAADDIEVE  
GTIIRKGDGVFFITSLINRDTDVHDAPNSLGWHHASADHLTFGFGAHQC  
LGQSLARITMEIALGALIDRLPSLRLAVPAEEVPFLPAASLQVMAELPIT  
W

>CYP107AY2 (2519871654) *Salinispora arenicola* CNH962

MTAEPTPIPRSGTRLGPEYDQLRKTDGVHQVLLPDASLAWLVTNPEVAAR  
ALADPRLALNRRNSRGGWSGFALPPALDANLLNLDAPDHTRLRRLVGPFAF  
SPQRVAALRPGIRRAAEHLLDTLVATSGPTDLVTGYCNPLSVQVIADLMG  
VPEAGRTNLRWTDTMLTSYPPDRDAIRQAVTELHGYYVDLIDIKQQQPG  
DDLSSALVTIEQDGDRLSRDELTSLAFLILFAGYENTANLIASAVRWLLD  
HGGLNVVPISEAIEGTLRHEPPAPVAIRRFPTEDIIIGGV TIPAGDTVLL  
SIAAATRGADGNAARLAFGNPHYCLGAALARVEAEEALTVLARRLPGLT  
LAVPPAQVRWRPTFRTHGPAELLVGW

>CYP208A12 (2519871724) *Salinispora arenicola* CNH962

MTLDTITPRVPLGPPRTAALRMLLVMKRDRLGMLTSAAARYGDASRLPVG  
HKALWFFNHPRYAKHVLADNSANYHKGIGLVHARRALGDGLLTSEGDLWR  
KQRKVIQPAFQSRRIAQQAGMIAEEAFALVERLRARAGAGPVELTAEITG  
LTLGVLGRSLLDADLAGFDSIGDSFATVQDQAMFELETNAVPMWIPR  
QIRFRARRKKLQAVVDTLVDGRAGNLANRVDVLSRLILSARGEADPRVGR  
ERLRDELVTLLLAGHETTASTLGWTLSLIDRHGPGVWERLHAEAVEVLGDR  
LPEYDDLRLRLRYTVMVVEEAMRLFPVWLLPRRALAPDTIGEYRVPANAD  
VVISPYTLHRHPEFWPNPERFDPERFAPGQAADRPRYAYLPFGAGPRFCV  
GNNLGMMEAVFVIALLCRHLRLTGVPGYRLVPEPMLSLRIRGGGLPLVVRP  
VS

>CYP107Q4 (2519871922) *Salinispora arenicola* CNH962

MTTTAETS AETIDLFSPEVVADPFGWYARLREETGPNTGTNLNIGTMMGGP  
EMWLVTTRYEDVRQVLTDPFRFLTNPADSPLEDIRAGVFKRLDFPPDLIPW  
MANLLNVSDGEDHTRLRKLVSALTAHRIGKLRPRVEKITADLLDKLAED  
GKDGSPVDLVEEYCYPLPVTVICELVGIDEPRPHWRAGDSMATMNGER  
IPTTLVKCIELARELIAKRAEPQDDLVTALVQAQAEQDNRVSDDEIIGI  
LFSLVTAGHQTTTYLIGNSVILLLENPDQLARLKENPSMWPQAVRELQRL  
GPIQFAQPRFPSEDIELGGVTIPRGAPVAPLLLAANTDPRRFDPNKLII  
DRLAVGSEHGLGFGKGIHRCLGQHLYQEAEEVALQGLFTRFPDLTLAVPR  
EEIPWILRPGFTTRTRLPLKLV

>CYP105G5 (2519871923) *Salinispora arenicola* CNH962

LTIETTETPAADDSLAPLPRQFMQRDDPSKLPPALAALAEQSPVGRSTL  
PDGDPFWMVSGYDEARAVLSDPRFSSDRFRYHPRFKKLSGQLGERLRNDK  
ARAGSFINMDPPEHTRYRKLLTGQFTVRRMRQLTVRIEQIVTEQLDVMLA  
EGNSADLVSAFAVPVPSLMICELLGVRYEDRTEFQRRAGLLQTDLPKQ  
AVENLEAQRAFMRQLVTDKRTTPADDMISGLVHHAGAEPPLTDELVGIA  
TLLLFAGLDTTASMLGLGMFMMLQRPEQMAVLRDDPSRIGDAVEELLRYL  
TVVSTGLFRFAKEDVVLGDEHIPAGSTVVVSLMAANRDGRHWPEPETLDV  
TRVRSSHLAFGHGVHQCLGQQARIELTVGITELLCLRLPNVRLAVPPADV  
PLRNDMITYGVHRLPILWGTP

>CYP1051A1 (2519871948) *Salinispora arenicola* CNH962

MATDAAKARARTVPAWKALPAAVRGAHRALVDVGNWSDGDVVRVSLGVSR  
PYLVTNPAHVQEVLEHERAAIYPRGDDTALWRSVRKLVGDGILAEGDAAWAA  
SRRVLAPMFRPARINAMVDTMADAIAGAVDDLHEAATAGTFIDVGRELSR  
IVCSAIMRVFFADRITVRDALRIMKAQETIVTAMAPRILAPLVPWWIPMP  
GDRRFRAAVRSIDDILLPVLRLQAQRQPDDGDDLLSRLVRARADDGRALSE  
KRMRDDLVSMVAVTETSTVVLTLWLWPLLANHPDVANRLYDEIDRVVGGG  
PVRGDHLAELTYTRMVLDELLRLYPAGWILPRRAATDVLGGVRINKGAT  
VILSPYVTQRMATAWWGPTAEAFDPERFAAGREAADGRHRYAYYPFGVGMH  
RCLGEHLFNLEAILIVATLLSRFRFALTDTSMPGVKVAASTRPARTVEMI  
LKPVAPVPAR

>CYP105AB36 (2519872093) *Salinispora arenicola* CNH962

MTEAASSRLTDTEFPVQRQCPFAEPVEYEQIREQSSIAMVRLTGGGEAWW  
ISGHEQGRAVLADRRFSSDRKANFPFVSTDPATRKRLHAQPLSMISMDG  
AEHAQARRALIGEFTVRRLAALRPRIQQIVDQCIDEMLTDDQHCVDLVKA  
LSLPVPSLVICELLGVYDDHDFQEHATLVRRNTAPEVRQHCVDELNA  
YLGALIDRKLANPDDDLGRQIARQHGDGTFDRASIVSLAFLLLVAGHET  
TANMISLGVVGLLQHPDQLTMIKKDPDKVPLAIEELLRFFTIVDSVTSRV  
ATEDVRFGDTTINAGDGVVVSGLSADWDPTVFADPDRLDLERGARRHHIAF  
GFGPHQCIGQNLARLELQIVFDTLFRRIPTLRLAAPLDKIPFKTDAAIYG  
ARELPVAW

>CYP105CT1 (2519872427) *Salinispora arenicola* CNH962

MNSPNHMPADRSLTAPASGCPMALSRGRVGLDVADEISELRDGGRLGRIT  
TAFGQEATLITRYDEVRAQMADSVVFNVAGVPSPPALVDGGFDTESVRRR  
RTVGNLIMLDPPEHTRLRRMVAAWFTTRRVERLRPRVVEIIDAALDEMER  
SGPPVDLVAMFAKTVPITVICELIGVPEELRERYRRRAERAVSASAVSTP  
LDELRLREAGWVSRELIEYHRENPSDDIIGMLLREHGTDSHDDGITDDE  
LVGLANALLIAGHETTTQMLSMGTLALLRHPDQLALLRDDPSIVAGAVEE  
LLRYVGVVLHGGFVRVATRDTRLGGHRIHAGELVVPALTAANRDPRLITDG  
DRLDITRPPTSHVAFGHGVHFCIGAPLARMELREAFPALLRRFPGLRLAV  
PDSELEFTQGTTVYSLRGLPVTW

>CYP105W2 (2519872504) *Salinispora arenicola* CNH962

MTGYQDRPTGDQPGAPVPSGSTDPGIGAFPLPRRCPPSPPAEYARLRAEH  
PVVRLPMLGGDTAWVVSRAHADVRLSDPRMSADRRRPGFPKFAPTTEGQ  
RQASFANFRPPLNWLDPPEHAICRRQIVDEFVRRVRQSRALVERVVDTH  
LDALTAGAPGADLVSTFAYPVPSQVICEVLGVYPYGEHEFFERRSTLMFRR  
STPADERARCAREIRDFLDMMVVTDKERRPGDDVLSRLLYRQRSAGGMDHE  
AVVSMAFVLLVAGHVTTSNMLALSVLALLTHPARLARLRAEPPERFPAAVE  
ELLRYFTVVEAATARTTTAEIMIGGVTIAAGEGVVALGQAANRDPRVFEH  
PDEFDPDRDARAHLAFGHGRHICPGQHLARLEMEVALSRLFRRLPGLRLT  
MEVSDLPLKEDSNIFGLYALPVAW

>CYP248A2 (2519872512) *Salinispora arenicola* CNH962

VLADAVTAFDPTAVDVRRDPYPSYHWLLRHDPVHRGAHQVWYVSRAFADVR  
AVLGDERFARTGIRRFWTDLVGPGLLSQIVGDIILFQDEPDHGRLRGVVG  
PAFSPSALRRLEPTIEATVNDLLRPARALGAMDVVADLAYPLALRAVLEL



LGLPAGDANAVGRWSRAVGRTLDRGATAEDMRRGHAAITEFADYVERALA  
ERREDGADLLALMLAAHRSQMSRNEIVSTVVTFIFTGHETVASQLGNGL  
LSLLDHPEQLELVRRQPHLVPQAVEECLRFDPVQSNTQRLAADVELHGR  
RLRRDDVVVVLAGAANRDPGRYDRPDELDIRRDPVPSMSFGAGMRYCLGS  
YLARLQLRTALGAMVALPDLRLVCNPNELAYQPRTMFRGLTRLFPVAFTPA  
G

>CYP107AX4 (2561687179) *Salinispora pacifica* CNR909

MTSQPAPVFDQLLLRDPHRRYNALRDEAPVHHIRTPDGAPAWLVTRYDDV  
RAAFTDPRLSVDKRLSSTDGEHGSSLPELDAHLLNRDPPDHTRLRRLAA  
AAFTPRRVADLRPAVERIVSTLLDGLVGHDQAEIIGSLASPLPLQVMQEL  
LGLPTQTSVDFRRWTNTLLSADANQPAQSRSAMANMRCFLVEQLAHKRAR  
PGDDLLTGLLAAREDDRLTDDELVAMLFLLMFAGYDNTAALIGNVVHAL  
LTNTELPAAVRTGSLALDELVDGVLRWNPSPFLAVRRFAREPITIAGQTI  
PAGDRIWLCLASANRDPAQFTAPDTLGTTGMRRPHLSFGHGIHYCLGAPL  
ARLQTTVAVTILLDRFPGIRMAVPAHDIRWRESFRLRGLVALPVFL

>CYP107AW7 (2561687194) *Salinispora pacifica* CNR909

VETVTGTSTPPVPYIADPYPTLARIRANGPVSILHSDEGIPMWVIARYR  
DVRAALADPRFGQDARRAQALADNRVAGVTLGGDIVHMLNSDPPDHTRLR  
RHHVQGAFTARRVAAMRPLVERITTSLLDGLTGRTTVDLVQDFAFPLPLV  
ICELLGFPAEERNAYRSWSTAILTHDDDPAAAFATALREMTDYIAVQLRIR  
QTRPGDDILTELLAARDAGQLTDEIIGMVFLLLIGGHETTVNLLGTATL  
ALMRNPDQHRWLLANQHALLPEAIDEFLRYESPVAMATLRFTTTPVAVDDV  
VIPAGELVLVLSLGGANRDPDRFPDADRLILDRRDTGHLAFGHGLHRCLGA  
FLGKLEGEVALGALLRRHPRLALAAEVRQLRWRDTIMLRGLESPLPVSLHG

>CYP125A65 (2561687682) *Salinispora pacifica* CNR909

MTEPRIPVGFDFTDPAVLERRVPREEFAELRRTAPVWWNVQPRGSAGFDD  
DGYWVVTRYADVMASRDSETYSTRENTAIARFQPGTTQADREMQRVIMI  
NVDPPPEHTKLRAIVSRGFTPRAINALRGSLAERAERIVRDAAVRGTGDFV  
TDVACELPLQAI AELIGVPQHHRKVFWDWSNQLIGYDDPAYGVDPMAAAA  
ELLAYAMEMANERQRNPSDDLVTKLVAQIDGEHLTTDEFGFFVMLLAVA  
GNETTRNAITHGMLAFLEHPDQWELFKAERPRSAVEEIIRWATPVNVFQR  
TALVDTTLGGQAITAGQRVALFYGSANFDESVEEPERFDITRSPNPHLG  
FGSGSVHFCLGANLARLEIELIFNSIADHMPDIRKVADPQRLRSGWINGI  
REMPVRYR

>CYP208A22 (2561687780) *Salinispora pacifica* CNR909

MTVIADRGGRIPPGPPVTAGLRLLLLALGRDRLGMMTSAAA EYGDVARLPV  
GPKKLYFFNHPDHAKHVLADNHANYQKGIGLVHARRALGDGLLTSEGELW  
RKQRRVIQPAFQNRRLAQYAGAVGQEATRLVARLATRVDPVPVLDLDMT  
RLTLGVLRGRTLLDAELTGFGHVGESFAAVQDQAMFELETNTVPTWIPLR  
RQRRFRRARQHLQEVVDVLA AERGQAVEGRDDVLSRLILSTRAEADPQLG  
RERLRDELVTLLLAGHETTASTLGWSLHLLDQHPELRERVRHEARTVLGD  
RVPAYEDLHQLRYTAMVVEEAIRLYPPVWILTRKARAEDEIGGYRVPAGA  
DILICPYTLHRHPRFWAEPPERFDPERFDPSRITDRPRYAYIPFGAGPRFC  
VGNNLGMLEATLVLA VLLRDLRLGLELPGRAVVPEPMLSLRVRGGLPMTVR  
RVD

>CYP124M3 (2561687801) *Salinispora pacifica* CNR909

MTVPIELDAVDLSDNDFWTKPLEYRHAVFNALRAQPGLPHFASPEFGSAP  
RGRGYYALTRMDDVLAVSRNPSVFI SGKGNVAMEVPAEF LDQSLITMDNP  
RHARLRRIVSRGFTMKAVTALMDNASQMAKQIVDEVVERGECDAVVDISA  
KLPLGII CNMMGIPDSQQQFVFEQTNVMLGVQDPEYVGEQNDAMLAMSV  
SQELADLMHELATLRKNPTDDLLSKLLSAEVNGEALTPSEL AHFFILLT  
GAGTETTRNAISWGIQLLTQSPEQREAWLSIDIGVTPTAVEEIVRWSSPV  
ISQRR TVAEDAEPVKLAGQLLGP GDKVLMFYGAANRDPNYFVHPEGFDVR  
RSPNPHVGYGGPGPHFCLGAHLARLEISVMFRELLTRIPDIHATGEPARL  
KSPLINGIKRLPVAFTPGAR

>CYP105AB28 (2561688033) *Salinispora pacifica* CNR909

MTETASTTTPGISSTTTSGPASGEVTD AEFPLERGC PFSTPTEYEQIREH  
SPLAKVRLTTGREAWWIAGHELGRAVLADRRFSSDRRRDNFPFVSTD PET  
RKQLQDQPTSMIGMDGAEHAQARRALMG EFTVRRMAGLRPRIQQIVDQHI  
DEMLSSDQRTADLVEALS LVPVSLVICELLGV PYADHDFQARSGLIRH  
TTPTEVRLRIQKELNTYLGALIDRKVADPTD DLLSRQIAKHHAAGTFDRT  
SLVSM AFLLLIAGHETTANMISLG VVGLLQHDPQLAMIKEDPEKT PPAVE  
ELLRYFTIADTVTARVATEDVQLGGTTINAGDGVVISGLAADHDPTVFTD  
PDRLDLERGARHHVAFGF GPHQCIGQTLARMELQIVFDTLFRRIPTLRLA  
APLDDIPFKSDAFVYGAERLPVAW

>CYP211B11 (2561688519) *Salinispora pacifica* CNR909

MDASEAVALLTSPPGRLDPYPTYERLRAHG PVVSTAAGFFVVTGYTEADT  
VLRNPRFEVMDDEERDGVFP HWQDSPAMISISRSMIRANPPDHSRMRRLA  
AGVFTPRRVAALREVVAQA DGLVDEMIRAGRGGA AVDFMG SFAYPLPVT  
VICALLGVPAADWARFRHWASDLTGVLEPEITPQELAIADAGASELRDYF  
TELIAQRRRAPADDLT TALVQAHDADGDRLSGEELLANLVLLL VAGFETT  
TNLLGNGLVLLTHPDSATALRGQPELAPGYVEEFLRYDSPVQLTSRTVR  
ESVSLAGVELPAGSWLLVLLGAANRDPARFTD PARFDPRRAQSPPLSFGA  
GAHYCLGAGLARLEAQVAFPLLLRRLPELALAGEPTRRHRLTLRGYETLP  
VTVGAVPADPGTPAGVALGTP

>CYP162B3 (2561690008) *Salinispora pacifica* CNR909

MSEEP EMHIDLLDPAPFGRNDFWSTFTWLRTHSPVHWHPEPGGDGFWALS  
KHRDIMKVYADSDTFSSGQGMRLGSDPA AVAAVSQRMLIVSDVPHHTRLK  
RALALAFGPQQMPRLKTLVEEVVYELLAESTEHELD FIDLAKQLPNRVV  
CVM MGIPRADWSWIGALT TDAFDSPPDSVRSKAHSEIFLYFIELLRERRA  
RSGDDLISQIAHETLVDEGDGVERPLSDEEIVFNCNGVLSGANETTRYSA  
AGAVHMF AEHPEQWELLRTRGQDGIATAAEEILRWTTPGVHALRTATRDT  
EINGTPIAKGDRVTLWNVSANRDEDVFTDPHAFRVDRRPNRHVAFGHGRH  
LCLGARLARFELQALLTG LLAHV DGFELTGPAVFNSSNFTWGIKSLPVRL  
LRSRSFAPAERAAL

>CYP161N4 (2561690064) *Salinispora pacifica* CNR909

VNTVAQLPFTQTHVLDVAPALRLLQSRGKVHRVRTPEGVPAWLVTGHAEV  
QQLLDDDRLSRSDPGGRDGGTALLNKLLG PLADDPRLRSLLEPQFTPER  
LEPLRAVVEKLTEQHLDELATRTPPVDLRPALAMSLPILVLCEWLGVPAE  
DKGRFSVWTQDAAGVQDPERSQRGLAE LFGYCRQLVAAKRQDPGDDVISR  
LIATAGIGDTEVVALTALLLF GGYETTVARIGTGVL LLLTNPDQWAAVRA  
DPALVSATVDELLRRSMPNPHNGGMPRFAVTGFEIDGAAIRAGDLVLLNI  
IAANHDETAFFDPDRLDITRPTAGSLAFGYGRHSCVGAPLARMVLRVALS  
RLITRF PDLRLAVGVDELKLRHETLVGGLVELPV TWGPR

>CYP2054A3 (2561690069) *Salinispora pacifica* CNR909

MSISADSEQVQGRPFDPYGAHRDDPYTFLAGLGVFYAPLLDAWCVTRRED  
MVAVLRDDRSFSARDHNPRPAVALPDDVNQMFRWTRGAGAVAVGSLDPPA  
HAKIRDVLNIGFTPARVRAFEPTMRAVAADLADRIGDAPEFDFIADFAPV  
FALEVIGRRLGVPDDYLDRCRTWSEQRIELMMAQGDADHDRLREFARGLM  
EFGEFARSLVRDRVADPRDDLISELLHDGKAGRTLTADEVAVQIPTLIFA  
GHMTCAEALGTIFYQQLRSPGGWARVVDRTIPVGD LVEEGLRFDSPLAGM  
YRTATRDVTVGGIRLTAGSRLLLLLYGAAGRDSRAHACPAAFRPGDGSSGH  
LAFGHGHIHFCLGAGFARAELRVAVEVLAARMPDLGLAPGRPPRFRPVFPL  
RALTEL RVTRSGGSGP

>CYP107FH3 (2561690075) *Salinispora pacifica* CNR909

VP IELDEAFVQDPYAVYEKLRAEGPAHRVRMPPGVPLIGGLPVWLITGYD  
AVRAALADSR LSTDLHRIDGLFAQKDPDRSHRGGFSSALASHMMHTDPPD  
HTRLRKLVS KAFTTRRAIEALRPRIQQTDELTAELAGHDTV DLLDAFAFP  
LPIRVICLLLGV PVAEQENFRSWSRALVSGHSPEAAATAATEVAAYLGDL  
VERKRHATTD DVLTA LVA AHDVDDRLTHTELVSTAYLLFIAGFETLNAL  
GNGTLHMLHRDQWTALRADRALLDNAVEEFLRLESPLKHATFRCATESL  
RIGDAEIAAGDFVLLAIASANRDP RRPDPHTLDVRRPAAGHLAFGHGHIH  
HCLGAPLARVEVRMAFDALLDAFPDMRLATDPAGLRWRNSTIIRGLDSL P  
VHLNN

>CYP1005A6 (2561690241) *Salinispora pacifica* CNR909

VSAVLF RSWTKTAGTHWPAVTRVADQQGTEHLVVTEHALVRQVLT DQVTY  
RPDNALDAVTPI PVAALRVLAGHRFRLPPTLANNGGVSHPAIRALVADAL  
HPAKVAAQR PWLTELVAERVAAIRATLDSGGSADLHAELSADLPLLVLAR  
LVELPDAPVSAVKQFARAAL EFWAPLDADRQLALADEVGRFHQV LREFA  
DTGGGLAAALRATGHPPDVLVGALFFLLVAGQETTSQFL TLLHLRLAGEP  
TVRAALRDGSVSVPNVVEEGLRLEPPIV TWRRVA AVDSTLGGTAVPAGTS  
VLLWLARAGRDPAIVSAPDEF RPGQRGSRRLAFGAGAHRC LGDQLARME  
AAVVVERVSPLLDGVTVVRAPWYPDNL TFRMPDAFVIRRG PAGAAER

>CYP107AY9 (2561691301) *Salinispora pacifica* CNR909

MSQDQPTRAELAPI PRSGARIGPEYDQLRK TG DVHQVLLPDTSM AVLTS  
PDLVSRALADPRLALNRKHSRGGWSGFALPPALDANLLNDAPDHTRLRR  
LVGPAFSPQRVAALRPRIQRTAEELAETMVATGSPVDLVTGYCTPLSVQV  
IADLLGVPDAGRTDLRAWTDMLTSYPPDRDAIRQAVVELHG YV VNLIEA  
KQQRPGDDL L SALVATEQEGDRLTRDELTS LAFLILFAGYENTANLIAS T  
VLRLLDHGSLRGVRVSEAIEETLRLEPPAPAAIRRFPT EEMTIGGATIPA  
GDTVLLSIAAATRGADGNPARLAFGN GPHYCLGAALARVEAEEAITVLAR  
RLPGLALAVPGAPVRWRPTFRTHGPAELLVAW

>CYP162G1 (2561691418) *Salinispora pacifica* CNR909

VDIDLADPAFFAEQDFVAHFRWLREESPLHWNPDGKEPGFWSLTRYDDCA  
RVQKDPVTFSS EITNTLGQHRWTGDHGAGRMLTHTDGRRHTELRGIVGRA  
FTPRAIATLEPYLR SVVAETFEQALEHRRVDFVETMAMLPVASIAALLGV  
PRADWPMVLKLTAAFGAGDSELGMSRDARIAAAAAHTQ LLLYCQDLMES  
RRRQPGDDIATRLVQAQEDGRLTEEEAMLFFDILLGGNETTRHGAVGGL  
LALIANPEQWAALRREPGLVDSAVQEILRYVSPSRHVLRSVTKDIELYGR  
TVRAGEQIVVWHSSANRDAAVFDHPDEFRLDRDPNPHLGLGSGSHYCVGA  
SLATLELRLTLEALSARVGAARVLEPPVPLASTVINGFKQVIVELTPS

>CYP107E37 (2561691969) *Salinispora pacifica* CNR909

VTIDQEIREYPPFRESRGIGIDPTYELLRRTEPLARVQLPYGEVSWLVTRY  
EDVKTVLTDPFRFSRAAAQGKDQPRTRAEMTYEGIIIGLDPDPDHTRLRRLAG  
KALTARRVNAIRADAQRIANEYVDEMIAGKSPGDLVELFALPYPVTVICE  
LLGVPPFEDRAQFRIWTEGLTSTSEQLMVYAEQLFDYMGKLVAQRRAEPTD  
DLLGALVKARDEGDRLTEQELLSIAGVGLLLTGIVETVSTHIPPVYALLT  
HPELMAQLRADRSLVPAAVEELLRMIPLNPAAMFFPRYAVEDVTLSGITVR  
AGQPVLVSLPGANRDPEVFENPETFDFTREQNPHVAFGHGPHHCLGAQLA  
RMELQVALHTVLD RFPDLRLADGDEGVSWKSGLLVRGPSRLLVGW

>CYP211C1 (2518469277) *Salinispora arenicola* CNX481

VVDVEELLTRLYSAQGRQDPFPVYADLHAQGPIAALPPEPERHRVAAVAV  
GYDLVGAVLRDPEWSKAPPPGWTEQEILRTLQTSMMFINPPDHGRMRHVF  
AGTFTPRRLGALEPVVNRVADELDRMADAGAGGLDFVAEFAYPLPARVM  
AEFIGIPETELDWYRERVDVIDAFLDVAGKTPQRLAAANAAGAELEAFYF  
ELLARRRRTPGEDLISGLVEAVDAGGVELTEDELVSNLIVLFNASFVTTV  
YMLSNGLPVLLAHPEVAAAALATDPVLTAGAVDEILRLQAPVHLLARAAPR  
DTVLGGVPIPPQGQNVLLLIAAAANRDPAHFPDPDRFDPWRS GPPSLAFGLG  
LHYCLGAAVSRLEGRALPRLLSRFPRLRIMEQPVYSGSLFLRGIDKLSV  
SPGEGSTRE

>CYP1005A1 (2518469398) *Salinispora arenicola* CNX481

VSAVLFERSWTKTAGTRWPDVTRVADQSGTEHLVVTRHALVRQVLTQATY  
RPDNALEAVTPIPVAAALRVLAGHRFRLPPTLANNGGVSHPAIRALVADAL  
HPTKVAAQRPWLTGLVADRVASIRTTLDSSGPVDLYADLTADLPLLVLAR  
LVELPDAPVNAVKKQFARAALFWAPLDADRQLALADEVGRFHQVLRFEFA  
DTGGGLAAALRATGHSPDVLVGALFFLLVAGQETTSQFLTLHRLSGEP  
TIRAALRAGSISVADVVEEGLRLEPPIVTVRRVAAVDSTLGGTTVAAGTS  
VLLWLARAGRDPVVAAPDEFPRPGQRGSRRHLAFGAGAHRC LGDQLARME  
AAVVVEQATPLLDGVTVVRPPWYPDNLTFRMPDAFVVRR

>CYP211B2 (2518469781) *Salinispora arenicola* CNX481

MDVSEAI AVLISPSGR LDPYPTYEQLRAHG PVSRTTAGLFVVTGYAEADM  
VLRDPRFVVLDLDDLRDDVFPHWQDSPA KSIARSMLRTNPPDH SRIRRLA  
AGAFTPRRVAAMREV VTAQADELVD EMIRAGRDGARVDFMDMFAYPLPVA  
VICALLGVPAADRSRFRRWAGDLTGILEPEITPEDLAGADAGADELRDYF  
TGLIEQRRRAPADDLTALVQAHDADGDRLS GEELLANLVVLLVAGFETT  
TNLLGNGLVVLLTRPEAAAAALRDEPD LAPGYVDELLRYDSPVQLTTRTVR  
ESVSFAGTELPA GSWLLVLLGAANRDPRRFDPARFDPWRAQS QPLSFGA  
GPHYCLGAGLARLEAQVAFPLLLRRLPELALAGRPSRRTRLT LRGYETLP  
ITVGAVTADRGT PAGVAPGTP

>CYP105BL2 (2518469872) *Salinispora arenicola* CNX481

MSSHSAAPDPETATPLHTLAPELTFPQFERSTPFDPPQAYTELSGRCPV  
APVSMADGKPSWLITSFEGVRTT LSDPRFSSDM SHPGFPNRTGKPVDDL  
KDTLGAM DGERHRYRRLMTGELTVRRAKAMRPVITQITDEALDQLAAAG  
PGADLVKHVAFVVP SRVACHLVGIPFSDYERFTGMAATLMDSTSSADQFA  
ALQNMVSYFDTLVTDREHHDRDDLGHMVRRYLATGELTRDMLIRLAWTT  
MAAGQETT AHMIGLVAALLRHPDQLELLRREPHLLPGAVDELMRYLPLI  
QFGIPRVAMDDVEVDGQTVTAGEGVVTL PPLANRDSAVFERPDELDVRRN  
ARQHLTFGYGPHQC PAHALARLELEVYGRLLERFPTLRLADSDADLKVQ  
DKDIMYRVSELAVTW

>CYP245A7 (2518470633) *Salinispora arenicola* CNX481

MPSATLPRFALTGWSRENIVNPYPVYQRYREVASVHRGEPGGDAPDTFYV  
FSYDEVVQVLSSNCFGRGRSLDAAKASVPVPAEQKALRAIVENWLVMFMDP  
PRHTELRSLLNRSFSPRIVTELPRPRIARIAQELLSRLGQQVDVDLVESFA  
APLPILVISELLGIPEERRAWLRANALALQEASSSRAGRDMMDGYARADVA  
AQEFTEYFREQVRLRRGRAGGDLITILANAQQRGAPVSLDAIVGTCVHLL  
TAGHETTTNSLAKAVLALREHPAVLDELRGADGLTTDAVEEFLRYDPPVQ  
AVTRWAHQDATLGCCDIPRGSRVVALLGSANRDPARFPSPDVLVRRPAD  
RHLSFGLGIHYCLGATLARAELEIGLQALLDGVPTLGYGTQHVDYADDLV  
FHGPSRLVLVNLGERCK

>CYP244A4 (2518470637) *Salinispora arenicola* CNX481

MSTTTNTELTEAPETNMPVDPLFDCMPDLIAAARVAPVVRIPYLGRHAW  
VVCDELVKQALTHPKMGKDIALVPEWMRQPGLMVTAPDPEYARAMIMS  
DGENHARIRRIHAPVLSRPNTERWGERVADKVEGFLELSQAGSGGSTEV  
NVVTNYTHKIPLAFISEMLGLPPEAEHRLRGITDIMLYSSDYAARREAIG  
GLFGAVEDWVRNPADLRDGVITGLLAASDGPDAAVTEGEVIVWTLGMIIT  
GYETTGLSLISTSLYEAIRPPHERPKTDEDITAWIEETLRVHPPFPHPPTW  
RFPLEDIELGGYLIPKGAPVQVSIAAANRKPGEAGDSFDAERRGHGHLSE  
GLGMHYCIGAPLVRLEAQIAVRGFLRRFPQARLSAETAVQWESEWMIRRM  
SVLPAVLS

>CYP166A4 (2518470777) *Salinispora arenicola* CNX481

MTDAISFELPWARTDKFDPPAVFDALREQRPLARMRYPDGHVGVIVSSYE  
LVREVLGDPRFSHSCAVGHFPVTHQGQVIPTHPQIPGMFIHMDPPEHTRY  
RRLLTGEFTVRRTSRLTGHEGVATEQIEVMREHGAPADLVATFARPLVL  
RVLSGLVLGLPYGERDRYLHAVTLHDAEADPAEAAAAYEQAGAYFDEVIE  
RRRRQPEDDLISTLVGGGELTGEELRNIVTLLLFAGYETTESALAVGMFA  
LLHHEDQLARLRADPTKIDAAIEELLRYLTVNQYHTYRTASEDIELHGEV  
INKGDSVTVSLPAANRDPARFACPAELDIDRETSGHVAFGFGIHCQLGQN  
LARVELRAGLSALLRAFPNRLRLAVPADEVPLRLQGSVFVAVKNLPVCW

>CYP125A41 (2518471383) *Salinispora arenicola* CNX481

MTEPRIPAGFDFTDPEVLAHVRVPREEFAELRRAPVWWNAQPRGSAGFDD  
DGYWVVTRYADVMTVSRDSDTYSTRENTAIARLRPDTTREDIEMQRVIML  
NVDPPEHTKLRAIVSRGFTPRAINALRGSLAERAHIVRDAAVRGVGVDFV  
TDVACELPLQAI AELIGVPQHHRKVFWDWSNQLIGYDDPAYGTDPLTASA  
ELLAYAMEMAERQSPSDDLVTCLVNAQIDGELTDEFGFFVMLLAVA  
GNETTRNAITHGMVAFLDNPEQWELFKAERP KSAVEEII RWATPVNVFQR  
TALVDTVLGGQAI SAGQ RVALFYGSANFDEAVFEDPERFDITRSPNPHLG  
FGGSGAHFCLGANLARLEIELIFNSIADHLPDIRKVAAPQRLRSGWINGI  
RQMPVRYR

>CYP105CP2 (2518471603) *Salinispora arenicola* CNX481

MTKSMPVQDLPAFPIPRECYPYRPSAQHVSLRSGGPMKVRLYNGRTAWLV  
TDSA HARAVLS DYRRVSIKPYHGNYP LLNEEF EKVVDSGYADVLFGVDPP  
EHTRQ RQMIMPSFTLRRTAVLRPDVQRI VDDKLDEM MRHGAPGDLVTEFA  
QPVP SMVMSFLLGV PWEDHEEFETPA HKLFVPELAEEATTEL GAYLERLI

QKKEQPGGTPGGTGLLDDLIRDHLRAGALSRDELVHIAMAMLVAGTDTT  
NVISLGLTALLDNPDPQWAALRDDPDELIPGAVEEILRYTSLIEAFARVAV  
SDIELNGAVIKEGEGILISSAGVNFDPALAPDPGRFDIRPPRPSPFSFSH  
GIHRCPGDNLARLELEIAFRSLVTRMPNLRRTAKPIDQIPSNNDGTLQRL  
YELPVVW

>CYP105CN1 (2518471605) *Salinispora arenicola* CNX481

MAAPAPQATQSTTPHPPSYPLPRECPYRPSAGTARLRDAGPVSTVRLYDG  
RTAWLVTGAEEARALLADSRVSNRADFPNYPVMDERHLSMRATREMAREE  
EGGFAAALFGMDPPEHTRQRLQLLPRTVTRQVAARRPAIQIRIVDEHLDAM  
EANGSPADLVSAFATPVPTMVVCTHLGVYPYQDRTRFEPAVAGLFEPDRAD  
AAMAELTAYLHQLIETKQSEPGDGVIDHLIANHLRPGAIDRAELVAIASA  
ILVAGTVTTSSAIALGTLALLTAPGQYAALVDNPDLPVGAVNEILRYLSL  
VEQLARVATEDIEIGGKLIRAGDGIIVSFAAGNLDPNVTTHPDRLDVALP  
PTNHLAFSHGIHHCIGQNLALLELDIAFRALVSRFPTLRLAVPAEQLPY  
FAGDVPRLACLPVTW

>CYP107FS2 (2518471606) *Salinispora arenicola* CNX481

MPVPQGEQNLTTTEVFADPKALFATLGSRQPLHRISLPDGMFAVLVTGNRE  
ARQALSDPRLVRSITAAAPELHKYHPLASDDYALSRHMLFADPPDHGRMR  
KLVSTAFTRRRVEQMRPRIQQITDDLIDVIAAKGEADLVETLALPLPIAV  
ISEMLGVFPFADRSEFERHAEVLTGINASSGFDALIAAGRWFDEYLAELVQ  
QRRREPQDDLISGMLAAQDKGDRLTDVELRSNALLLSAGFETTVNLVAN  
GLLALLRHPEAMAALRSEPNLMTTAVDELLRYDSPVSCVTYHFAQEPVEI  
GGFEIRSGEHVVIAAAAANHDPTVFADPSRLDLRREGSGQILSFSHGIHF  
CLGAPLARLEGEIAFGTVLRRLAGLTLAVPTDSLWVKASFVLHRLERLPV  
TFTPDRAPNPIDSVHTV

>CYP1051A1 (2518471737) *Salinispora arenicola* CNX481

MATDAAITRARTVPAWKALPAAVRGAHRAFDVGNWSDGDVVRVSLGVSR  
PYLVTNPAHVQEVLEHERAAIYPRGDDTALWRSVRKLVGDGILAEGDWAA  
SRRVLAPMFRPARINAMVDTMADAIAGAVDDLHGAATAGTPIDVGRELSR  
IVCSAIMRVFFADRITVGDALRIMKAQETIVTAMAPRILAPLPWWIPMP  
GDRRFRAAVRSIDDIILPVLRLQAQRQPDGDDLLSRLVRARADDGRALSE  
KMRDDLVSMVAVTTETSTVVLTWLWPLLANHPDVANRLYDEIDRVVGGG  
PVRGDHLAELTYTRMVLDELLRLYPAGWILPRRAATTDVLGGVRINKGAT  
VILSPYVTQRMATAWWGPTAEAFDPERFAAGREAADGRHRYAYYPFGVGMH  
RCLGEHLFNLEAILIVATLLSRFRFALTDTSMPGVKVAASTRPARTVEMI  
LKPVAVPPAR

>CYP105G5 (2518471761) *Salinispora arenicola* CNX481

LTIETTETPTDDSLRAPLPRQFMQRDDPSKLPPALAALAEQSPVGRSTL  
PDGDPFWMVSGYDEARAVLSDPRFSSDRFRYHPRFKKLSGELGERLRNDK  
ARAGSFINMDPPEHTRYRKLLTGQFTVRRMRQLTVRIEQIVTEQVDVMLA  
EGNSADLVSAFAVPVPSLMICELLGVRYEDRTEFQRRAGLLQTDLPKQ  
AVENLEAQRAFMQRLVTDKRRTPADDMISGLVHHAGAEPPLTDELVGIA  
TLLLFAGLDTTASMLGLGMFMLLQRPQMAVLRDDPSRIGDAVEELLRYL  
TVVSTGLFRFAKEDVVLGDEHIPAGSTVVVSLMAANRDGRHWPEPETLDV  
TRVRSSHLAFGHGVHQCLGQQARIELTVGITELLRRLPNVRLAVPPADV  
PLRNDMITYGVHRLPILWDTP

>CYP107Q4 (2518471762) *Salinispora arenicola* CNX481

MTTTAETS AETID LFSPEVVAD PFGWYARLREETGPTTGTLNIGTMMGGP  
EMWLVTRYEDVRQVLTDP RFLTNPPADSPLEDIRAGVFKRLDFPPDLIPW  
MANLLNVSDGEDHTRLRKLVS YALTAHRIGKLRPRVEKITADLLDKLAED  
GKDGSPVDLVEEYCYPLPVTVICELVGIDEPDRPHWRAWGDSMATMNGER  
IPTTLVKCIELARELIAKRR AEPQDDLV TALVQAQAE DQNRVSDDEIIGI  
LFSLVTAGHQTTTYLIGNSVILLLENPDQLARLKENPSMWPQAVRELQRL  
GPIQFAQPRFPSEDIELGGVTIPRGAPVAPLLLAANTDPRRFPDPNKLI I  
DRLAVGSEHGLGFGKGIHRCLGQH LAYQEA E VALQGLFTRFPDLSLAVPR  
EEIPWILRPGFTRTRTLPLKLV

>CYP208A12 (2518471990) *Salinispora arenicola* CNX481

MTLDTITPRVPLGPPRTAALRMLLV MKRDRLGMLTSAAAARYGDASRLPVG  
HKALWFFNHPRYAKHVLADNSANYHKGIGLVHARRALGDGLLTSEGD LWR  
KQRKVIQPAFQSRRIAQQAGMIAEEAFALVERLRARAGAGPVELTAE LTG  
LTLGVLGRSLLDADLAGFDSIGDSFATVQDQAMFELET LNAVPMWIPLPR  
QIRFRRARRKLQAVVD TLVDGRAGNLADRVDVLSRLILSARGEADPRVGR  
ERLRDELVTLLLAGHETTASTLGWTL SLIDRHPGVWERLHAEAVEVLGDR  
LPEYDDLRLRLRYTVMVVEEAMRLFPPVWLLPRRALAPDTIGEYRV PANAD  
VVISPYTLHRHPEFWPNPERFDPERFAPGQAADRPYAYLPFGAGPRFCV  
GNNLGMMEAVFVIALLCRHLRLTGVPGYRLVPEPMLSLRIRGGLPLVVRP  
VS

>CYP107AY2 (2518472783) *Salinispora arenicola* CNX481

MTAEPTPIPRSGARLGQEYDQLRK TGDVHQVLLPDASLAWLV TNPEVAAR  
ALADPRLALNRRNSRGGWSGFALPPALDANLLNL DAPDHTRLRRLVGP AF  
SPQ RVAALRPGIRRAAEHL LDTLVATSGPTDLVTGYCNPLSVRVIADLMG  
VPEAGRTNLRAWTDTMLTSYPPDRDAIRQAVTELHG YVVDLIDIKQQQPG  
DDL LSALVTIEQDGDRLSRDELTS LAFLILFAGYENTANLIASAVLWLLD  
HGGLNVVPISEAIEATLRHEPPAPVAIRRFPTEDIIIGGLTIPAGDTVLL  
SVAAATRGADGNAARLAFGNPHYCLGAALARVEAE EALTVLARRLPGLT  
LAVPPSQVRWRPTFRTHGPAELLVGW

>CYP105J3 (2518472924) *Salinispora arenicola* CNX481

MTDSVAFPQGRVCPHPAPGYRPLAVQRPLAQVTLYDGRRVWAVTTRDLA  
RRLLVDPRISSDR TNPAWPAIVPIVAAA VND AQQKVLKIATALVGT DGPE  
HKAQRKMLIPSF TFRMNALRPMIQEIVDQQLDEMIKSGAPTDLIPAFAS  
AVPVTVLYRLMGIPDDDHGIF EKL SHQLLACPNANEAYDQLMGYMSRLIA  
ERRRNPEG EGVLDLLAQHGANDDADHDELVSTLVVQVAGNHGTTGSMIAL  
GLFALLQHPEQLAELRADP SLMPTAVDELLRFLSVPD AVTRLAADDIEVE  
GTIIRKGDGVFFITSLINRDTDVHDAPNSLGWHHASAADHLTFGFGAHQC  
LGQSLARITMEIALGALIDRLPGLRLAVPAEEVPFLPAASLQVIAELPIT  
W

>CYP105AB8 (2518473001) *Salinispora arenicola* CNX481

MTETASSRLTDTEFPVQRECPFAEPVEYEQIREQSSIAMVRLTGGGEAWW  
ISGHEQGRAVLADRRFSSDRKANFPFVSTDPAIRKRLHAQPLSLISMDG  
AEHTQARRALIGEFTVRRLAALRPRIQQIVDQCID EMLTTDQHCADLVKA  
LSLPVPSLVICELLGV PYADHDFEQEHTATLVRRNTASEVRQHS IDELNA  
YLGALIDRKLASPD DDLGRQIARQHRDGTTFDRSSMVSLAFLLLVAGHET  
TANMISLGVVGLLQHPEQLAMIKNDPDKTPLAIEELLRFFTIVDSVTSRV  
ATEDVRFGDTTINAGDGVVVSGLSADWDPTVFADPDRLDLERGARHHLAF  
GFGPHQCLGQNLARLELQIVFDTLFHRIPTLRLAAPLDKIPFKTDAAIYG  
ARELPVAV

>CYP248A2 (2518473455) *Salinispora arenicola* CNX481

VLADAVTAFDPTAVDVRDPYPSYHWLLRHDPVHRGAHQVWYVSRFADVR  
AVLGDERFARTGIRRFWTDLVGPGLLSQIVGDIILFQDEPDHGRLRGVVG  
PAFSPSALRRLEPTIEATVNDLLRPARALGAMDVVADLAYPLALRAVLEL  
LGLPAGDANAVGRWSRAVGRTLDRGATAEDMRRGHAAIAEFADYVERALA  
ERREDGADLLALMLAAHRSQMSRNEIVSTVVTFTFTGHETVASQLGNGL  
LSLLDHPEQMELMRRQPHLVPQAVEECLRFDPAVQSNTRQLAADVALHGR  
RLRRDDVVVVLAGAANRDPGRYDRPDELDIRRDVPVPSMSFGAGMRYCLGS  
YLARLQLRTALGAMVALPDLRLVCSPNELAYQPRTMFRGLTRLPVAFTPA  
G

>CYP105W2 (2518473463) *Salinispora arenicola* CNX481

MTGYQDRPTGDQPGAPVPSGSTDPGIGAFPLPRRCPFSPPAEYARLRAEH  
PVVRLPMLGGDTAWVVSRAHADVRLSDPRMSADRRRPGFPKFAPTTEGQ  
RQASFANFRPPLNWLDPPEHAICRRQIVDEFVSRRVRQSRALVERVVDTH  
LDALTAGAPGADLVSTFAYPVPSQVICEVLGVYPYGEHEFFERRSTLMFRR  
STPADERARCARERIRDFLDVVVTDKERRPGDDVLSRLLYRQRSAGGMDHE  
AVVSMAFVLLVAGHVTTSNMLALSVLALLTHPARLARLRAEPPERFPAAVE  
ELLRYFTVVEAATARTTTAEVTIGGVTTAAGEGVVALGQAANRDPRVFEH  
PDEFDPDRDARAHLAFGHGRHICPGQHLARLEMEVALSRLFRRLPGLRLT  
MEVSDLPLKEDSNIFGLYALPVAW

>CYP154M5 (2518473619) *Salinispora arenicola* CNX481

VEQSCPYKLDVTGRDVAEGEAIARARGPVAQVELPGGVQGWSVTGYQAAR  
QVLADPRFAKDPKKWPAYTSGAIPPNWPLIGWLLMDNMTTNDGADHQRLR  
KLVSHGFTPRQVERTRPLIVKIVNDLLDGLSSAGPDEVVDLKGRFATPLP  
ARVICDMFGVPEALRASVLRGAQVNVTSISGEEAEANVEQWHRELLELV  
EAKREKPDEDMASLLIAAKEEDGSTLTQEEVVGTLHMLMGAGSETLMNAL  
SYAVLGMLSNGQYEMVRNGTSSWDDVIEETLRAQAPVAQLPLRYATEDV  
AVGGAVIKAGDPVLMGFTAIGRDPVHGETAGDYDITREDKTHLSFGHGV  
HFCLGAPLARLELKIALPALFERFPNMTLAVRPDQLEPQGTFFIMNGHREL  
PVR LGQPATVLA

>CYP105CT1 (2518473636) *Salinispora arenicola* CNX481

MNSPNHMPADRSLTAPTSGCPMALSRGRVGLDVADEIGELRDGGRLGRIT  
TAFGQEATLITRYDEVRAQMADSVVFNVAGVPSPPALVDGGFDTESVRRR  
RTVGNLIMLDPPEHTRLRRMVAAWFTTRRVERLRPRVVEIIDAALDEMER  
SGPPVDLVAMFAKTVPITVICELIGVPEELRERYRRRAERAVSASAVSTP  
LDELRLREAGWVSRELIEYHRENPSDDIIGMLLREHGTDSDHDDGITDDE  
LVGLANALLIAGHETTTQMLSMGTLALLRHPDQLALLRDDPSIVAGAVEE  
LLRYVGVLHGGFVRVATRDTRLGGHRIHAGELVVPALTAANRDPRLTDTG  
DRLDITRPPTSHVAFGHGVHFCIGAPLARMELREAFPALLRRFPGLRLAV  
PDSELEFTQGTTVYSLRGLPVTW

>CYP211B13 (2517900732) *Salinispora pacifica* CNT148

MDASEAVALLMSPPGRLDPYPTYERLRAHGTVVPTAAGFFVVTGYTEADT  
VLRNPRFGVMDDEEREGVFPHWQESPAAMMSISQSMIRANPPDHSRMRRLA  
AKAFTPRRVAALREVVAQAADGLVDGMIRAGRGGAPVDFLGSFAYPLPVA



VICALLGVPAADWAQFRRWASDLTGVLEPEITPQELAVADAGARELRDYF  
TELVAQRRRAPADDLTALVQAHDADGDRLSGEELLANLVLLLVAGFETT  
TNLLGNGLVVLNHPDSATALRDQPELAPSYVEELLRYDSPVQLTTRTVR  
ESVPLAGVELPAGSWLLVLLGAANRDPARFTDPARFDPRAQSPPLSFGA  
GAHYCLGAGLARLEAQVAFPLLLRRLPELALAGEPTRRNLTLRGYETLP  
VTVGAVAADHGTPAGVALGTP

>CYP1005A6 (2517901058) *Salinispora pacifica* CNT148

VSAVLFERSWTKTAGTHWPAVTRVADRQGT EHLVVTEHALVRQVLTQVTY  
RPDNALDAVTPIPV TALRVLAGHRFRLPPTLANNGGVNHPAIRALVADAL  
HPAKVAAQRPWLTELVAERVAAIRATLDAGGSADLHAELSADLPLLVLAR  
LVELPDAPVSAVKQFARAALFWAPLDADRQLALADEVGRFHQVLRIFA  
DTGGGLAAALRATGHPPDVLVGALFFLLVAGQETTSQFLTLLHRLAGEP  
TVRAALQDGSVSVTSVVEEGLRLEPPIVWRRVAAVDSTLGGTAVPAGTS  
VLLWLARAGRDP AIVPAPDEF RPGQ RGSRRHLAFGAGAHRC LGDQLARME  
AAVVVEQATPLLDGVTVVRAPWYPDNLTFRMPDAFVIRR

>CYP107AW9 (2517901444) *Salinispora pacifica* CNT148

VETVTGTSAPPPVPYIADPYPTLARIRANGPVSILHSDEGLPMWVIARYQ  
DVRAALADPRFGQDSRRQAALADNRVAGVTLG GDIVHMLNSDPPDHTRLR  
RHHVQGAFTARRVAAMRPLVERITTSLLDGLAGRTTVDLVQDFAFPLPLV  
ICELLGFPAEERNVYRSWSTAILTHDDDPTAFATALREMTDYIAVQLRIR  
QTRPGDDLLTELLAARDAGQLTDDEIIGMVFLLLIGGHETTVNLLGTATL  
ALMRNPDQHRWLLANQPALPEAIDEFLRYESPVAMATLRFTTTPVAVDDV  
VIPAGELVLVSLGGANRDPDRFPDADRLILNRHDTGHLAFGHGLHRCLGA  
LLGKLEGEVALGALLRRYPRLALAAEVRQLRWRDTIMLRGLESPLVSLHG

>CYP107AX11 (2517901456) *Salinispora pacifica* CNT148

MTSPAPVFDQLLLRDPHRRYNALRDEAPVHHIRTPDGAPAWLVTRYDDV  
RAAFTDPRLSVDKRLSSTDGEHGSSLPPELDAHLLNRDPPDHTRLRRFAA  
AAFTPRRVADLRPAVERIVSTLLDGLAGNDHAELIGSLASPLPLQVMQEL  
LGLPTQTSVDFRTWTNTLLSADANQPAQSR SAMASMRFLIEQLAHKRAR  
PGDDLLTGLLAPHADGDRLSDDELVAMLFLLMFAGYDNTAALIGNVAHAL  
LTNAELAEAVRTGSLAVDELVDGVLRWNP SFPLAVRRFAREPVTIAGQLI  
PAGDRIWLCLASANRDP AQFTEPDTL GTTGMRCPHLSFGHGIHYCLGAPL  
ARLQTTVAITSLLDRFP GIRLAVPAQDIRWRESFRLRGLVALPVFLSDGC  
GSGGTYG

>CYP125A66 (2517902687) *Salinispora pacifica* CNT148

MTEPRIPKGFDFTDPAVLERRVPREEFAELRRTAPVWWNAQPKGSAGFDD  
DGYWVVTRYADVMAVSRDSETYSTRENTAIARFQPGTTQADREMQRVIMI  
NVDPPEHTKLRAIVSRGFTPRAINALRGSLAERAERIVRDAAARDTGDFV  
TDVACELPLQAI AELIGVPQHRRKVFDWSNQLIGYDDPAYGVDPMAASA  
ELLAYAMEMAHERQRNPSDDLVTQLVNAQIDGEHLTADEF GFFVMLLAVA  
GNETTRNAITHGMLAFLENPEQWELFKAERPRSAVEEII RWATPVNVFQR  
TALVDTTLAGQAI SAGQRVALFYGSANFDES VFEEPERFDITRSPNPHLG  
FGGSGVHFCLGANLARLEIELIFNSIADHMPDIRQLADPQRLRSGWINGI  
REL PVQYH

>CYP105AB33 (2517903372) *Salinispora pacifica* CNT148

MTETASITTAGASSTATSGPGSGEVTDAEFPVERGCPFSTPAEYEQIREH

APLAKVRLTTGREAWWIAGHELARAVLADRRFSSDRRRDNFFVSTDPET  
RKQLQDQPI SMLGMDGAEHAQARRALMGFTVRRMAGLRPRIQQIVDQHI  
DEMLSSEQRSADLVEALSLPVPSLVICELLGVADHDFQAHGTGPLVRH  
NTPSQVRVRIQEELNTYLGGLIDRKVADPTDDLLSRQIAKQRAAGTFDRT  
SMVSMAFLLLIAGHETTANMISLGVVGLLQHPDQLAKIKEDPEKTPPAVE  
ELLRYFSITDTVTARVATEDVQLGDTTINAGDGVVISGLAADHDPTVFTD  
PTRIDLERGARHHVAFGFGPHQCIGQTLARLELQIVFDTLFRRIPTLRLA  
APLDDIPFKSDAIYGAEEELPVAW

>CYP1223A5 (2517904212) *Salinispora pacifica* CNT148

MREVGRAVQALFGPAGCAEPYPHYEALRRAAPVCPLPDNIVLVSRYAEAE  
RVIRDPRFLMEDAAWIGQSHPGWTEHPSFRSLMLEMVNHNPPDHARLRRL  
VSRAFTPRRVAELRPAVEQLIDDLQMAAREGGTADFMADFALPLPVTV  
IGELLGIPPADRIWFAPRVEAFTDAIEESMRGPSLAEADQAVKELWARLG  
ELADERRRNPRNDMVSELVSVSDSGDDRLSHDELLANLVLLYAAGYETTS  
NLLGNGLAALLERPALKERLRQNPTQASAFVEEMLRFDPPIQIATRYTAQ  
ATTLLGGLNIDAGTQIIIVLIGSANRDPDRFADPDEFDPDRADGGSMVFGVG  
AHYCLGAALARMEAEIAFPRLDRFPAITGHAPGVRRRKSLRGFTQLPIS  
LS

>CYP107AY10 (2517904853) *Salinispora pacifica* CNT148

MYQDQPTRAQLAPIPRSGALLGQEYDQLRKTGDVHQVLLPDTSMAWLVTS  
PELVSRALADPRALNRKHSRGGWSGFALPPALDANLLNLDAPDHTRLRR  
LVGPAFSPQRVAALRPVQRTAEELADTVLATGSPVDLVTGYCTPLSVQV  
IADLLGVPEAGRTDLRAWTDMLTSYPPDRDAIRRAVVELHGYVNVNLIDA  
KQQRPGDDL SALVATEQEGDRLTRDELTSLAFLILFAGYENTANLIAS  
TLRLLDHGSLRGVQASEAVEETLRLEPPAPAAVRRFPTEEMTIGGATIPA  
GDTVLLSIAAATRGADGNSARLAFNGPHFCLGAALARVEAEAEITVLAR  
RLPSLALAVPGAPVRWRPTFRTHGPAELLVTW

>CYP211C4 (2517905018) *Salinispora pacifica* CNT148

VPDIEGLLTRLYSAPGRQDPYPVYADLHAQAAIAALAPRPERQRVAAVAV  
GYDLVAAVLRDPEWGKQPPPGWTDQEILRTLQSSMMFINPPDHGRMRHVF  
AGTFTPRRLGALAPVINRVTDDELDRMADAGPGEVDFVTEFAYPLPARVM  
AEFIGIPATELTWYRERVDRIDAFLDVAGKTPERLAAANAAGAE LRAFYR  
ELLVHRRRMPGEDLISGLVEAVDAGGVELTEEELISNLIVLFNASFVTTV  
YLLSNGLPVLLAEPEVAAALADDPELTAGAVDEILRLQTPVHLLARAAPR  
DTVLLGGVSI PQGQNVLLIIAANRDP AHFPDPDRFDP RRS GP PSLAFGLG  
LHYCLGAAVSRLEGRALPRLLSRFPRLRILEQPVYSGSLFLRGIDRLSV  
SPGGRSIRE

>CYP1278B4 (2517905315) *Salinispora pacifica* CNT148

MPSPVGAVVHPNPYPYAAAMVAERPFFHFDEQLDTWVAASAAAAQAVLTAP  
GCRVRPPHEPVPQGITGTGTPAGDVFGNLVRMTDGE PQHRLKAIVTQTLGAV  
DRSTVAATAMRHARQVLNDSVRTPYEQLMFELPAQVVATLCGLDPAAGGE  
ATRLVGHFVQCIPATASPEQQQRAARAAAGLQELLGSKLDDTQHGLLGDL  
VRMATHVGWTDQAPLLANGVGFLSQTYDATAALMGNTLLALSQQECELPI  
SEMALQRFVREVIRHDAPIQNTRRFTATPIRHGDVEVPAGQAVLVLLAAA  
NRDPAANPDPHMFADRTAPNVFTFSAGAHHCGETLAVTIVTTVVEQLL  
RVGFDPAKLSTQVSYPSPNARIPVLT

>CYP105J3 (2571075757) *Salinispora arenicola* CNH713

MTDSVAFPQGRVCPHQAPGYRPLAVQRPLAQVTLYDGRRVWAVTTRDLA  
RRLLVDPRISSDRTPAWPAIVPIVAAVNDAAQQKVLKIATALVGTGPE  
HKAQRKMLIPSFTEFSRMNALRPMIQEIVDQQLDDEMIKSGAPTDLIPAFAS  
AVPVTVLYRLMGIPDDDHGIFEKLSHQLLAGPNANEAYDQLMGYMSRLIA  
ERRRNPGEGLVDDLLAQHGANDDADHDELVSTLVVQVAGNHGTTGSMIAL  
GLFALLQHPEQLAELRADPSLMPTAVDELLRFLSVPDAVTRLAADDIEVE  
GTIIRKGDGVFFITSLINRDTDVHDAPNSLGWHHASAADHLTFGFGAHQC  
LGQSLARITMEIALGALIERLPSRLAVPAEEVPFLPAASLQVIAELPIT  
W

>CYP125A41 (2571075909) *Salinispora arenicola* CNH713

MTEPRIPAGFDFTDPEVLAHRVPREEFAELRRTPVWWNAQPRGSAGFDD  
DGYWVVTRYADVMTVSRSDTYSTRENTAIARLRPDTTREDIEMQRVIML  
NVDPPPEHTKLRAIVSRGFTPRAINALRGSLAERAHEHIVRDAAVRGVGVDFV  
TDVACELPLQAI AELIGVPQHRRKVFWDWSNQLIGYDDPAYGTDPLTASA  
ELLYAMEMAEERQSPSDDLVTCLVNAQIDGHELTDEFGFFVMLLAVA  
GNETTRNAITHGMVAFLDNPEQWELFKAERPKSAVEEIIIRWATPVNVFQR  
TALVDTVLGGQAI SAGQRVALFYGSANFDEAVFEDPERFDITRSPNPHLG  
FGGSGAHFCLGANLARLEIELIFNSIADHLDPDIRKVAAPQRLRSGWINGI  
RQMPVRYR

>CYP211C1 (2571076059) *Salinispora arenicola* CNH713

VVDVEELLTRLYSAQGRQDPFPVYADLHAQGPIAALPPEPERRRVA AVAV  
GYDLVGAVLRDPEWSKAPPPGWTEQEILRTLQTSMMFINPPDHGRMRHVF  
AGTFTPRRLGALEPVVNRVADELDRMADAGAGGLDFVAEFAYPLPARVM  
AEFIGIPETELDWYRERVVIDAFLDVAGKTPQRLAANAAGAE LRAFYG  
ELLARRRRTPGEDLISGLVEAVDAGGVELTEDELVSNLIVLFNASFVTTV  
YMLSNGLPVLLAHPEVAAALATDPVLTAGAVDEILRLQAPVHLLARAAPR  
DTVLGGVPI PQGQNVLLLLIAAANRDP AHFPDPDRFDPWRSGPPSLAFGLG  
LHYCLGAAVSRLEGRALPRLLSRFPRLRIMEQPVYSGSLFLRGIDKLSV  
SPGEGSTRE

>CYP105AB8 (2571076177) *Salinispora arenicola* CNH713

MTETASSRLTDTEFPVQRECPFAEPVEYEQIREQSSIAMVRLTGGGEAWW  
ISGHEQGRAVLADRRFSSDRKANFPFVSTDPAIRKRLHAQPLSLISMDG  
AEHTQARRALIGEFTVRRLAALRPRIQQIVDQCIDEMLTDDQHRADLVKT  
LSLPVPSLVICELLGVPPYADHDFQEHATLVRNTASEVRQHSIDELNA  
YLGALIDRKLASPDDDLGRQIARQHRDGTFRSSMVSLAFLLLVAGHET  
TANMISLGVVGLLQHPEQLAMIKDDPKTPLAIEELLRFFITIVDSVTSRV  
ATEDVRFGDTTINAGDGVVVSGLSADWDPTVFADPDRDLERGARHHLAF  
GFGPHQCLGQNLARLELQIVFDTLFHRIPTLRLAAPL DKIPFKTDAAIYG  
ARELPVAW

>CYP166A4 (2571076408) *Salinispora arenicola* CNH713

MTDAISFELPWARTDKFDPPAVFDALREQRPLARMRYPDGHVGWIVSSYE  
LVREVLGDPRFSHSCAVGHFPVTHQGQVIPTHPQIPGMFIHMDPPEHTRY  
RRLLTGEFTVRRTSRLTGHVEGVATEQIEVMREHGAPADLVATFARPLVL  
RVLSGLVGLPYGERDRYLHAVTLLHDAEADPAEAAAAAYEQAGAYFDEVIE  
RRRRQPEDDLISTLVGDGELTGEELRNIVTLLLFAGYETTESALAVGMFA  
LLHHEDQLARLRADPTKIDAAIEELLRYLTVNQYHTYRTASEDIELHGEV  
INKGDSVTVSLPAANRDPARFACPAELDIDRETSGHVAFGFGI HQCLGQN  
LARVELRAGLSALLRAFPNRLAVPADEVPLRLQGSVFAVKNLPVCW

>CYP105CH1 (2571076417) *Salinispora arenicola* CNH713

VSSLPLPTYPTLRDPADPLLPPAEYLAIQSEKPIAKVLLPSGRPTWLITG  
HALARQVLTEPCVSVDRRHFNFPYPVNPDAVVAQVARWTYILLGDDPPL  
HTERRLLI SEFTVRQAQAMRPRIQQLVDFHLEQLIAAGPGADFSKHFAM  
KVPSAVICEMLGVPFADHDYFQERTALQLRRDVPVAAQKQAIDELLAYFE  
QLIQEKSSHPGDDVLSRLIVSNREIEAFDHEALVALGLLLLLVGGHETTAN  
TLTLATATMLERPEIAEQLRDPSLMPSAVEEFLRYFSVAVAVSRIATAD  
LQVGGQLVRAGESMLLVLNNTIARDGTVFPEPHRLDIRRNARNHLAFSHGI  
HQC MGQNLARVEMQIALD TVLRRLPGLHLVTPFEELPFKYRHLVWGIEEL  
RVAW

>CYP105BL2 (2571076492) *Salinispora arenicola* CNH713

MSSHSAAAPDPETATPLHTLAPELTFPQFERSTFPDPPQAYTELSGRCPV  
APVSMADGKPSWLITSFEGVRTTSLDPRFSSDMSHPGFNRTGKPVDDL  
KDTLGAMDGERHRYRRLTGTGELTVRRAKAMRPVITQITDEALDQLAAG  
PGADLVKHVAFVVP SRVACHLVGIP LSYELFTGMAATLMDSTSDDQFA  
ALQNMVSYFDTLVTDREHHDRDDLGHMVRRYLATGELTRDMLIRLAWTT  
MAAGQETTAHMI GLGVAALLRHPDQLELLRREPHLLPGAVDELMRYLPLI  
QFGIPRVAMDDVEVDGQTVTAGEGVVALPPLANRDP AVFERPDELDVRRN  
ARQHLTFGYGPHQCPAHALARLELEVYGRLLERFPTLRLADSDADLKVQ  
DKDIMYRVSELAVTW

>CYP162P1 (2571076922) *Salinispora arenicola* CNH713

MGLPSEVDLAEPDLADPDLYAEGDPDAEWAWLRAHRPVYRNPAGATAEFW  
ALTRYRDALQVYRDPSTFSSERGMVLGVDPVAGDPAAGRMLVVTDPPRHP  
KLRRIVSGIFVPRTMHRLEGRVRS LVDQLLHRVVDGAGRCDFVNDVAARL  
PVAIIICELLGVPADEQDWMYHLTSTAFGGGDPAGSAEVS AVERAEAYGDI  
LLYYGELAAERRRRPGDDLVTLLVHADLDGEPLDVEDVLVNCTNLIIGGN  
ETTRHAASGGLLALAQRPELWRRRLRETPTAVPTAVEEVLRWTTPGMHVLR  
TATRDTEIGGVPIRAGERVVVWNAANRDEDVFADPQHFDIDRSPNRHIA  
FGQGGHHCLGAALARLELTILFEEMAKQVTNVRLTGPVRRVRSCVLRGIR  
ALPVELVT

>CYP1005A1 (2571077435) *Salinispora arenicola* CNH713

VSAVLFRSWTKTAGTRWPGVTRVADQSGTEHLVVTRHALVRQVLT DQATY  
RPD NALEAVTPIPVAAALRVLAGHRFRLPPTLANNGGVSHPAIRALVADAL  
HPTKVAAQRPWLTGLVADRVASIRTTLD SGGPVDLYADLTADLPLLVLAR  
LVELPDAPVNAV KQFARAALFWAPLDADRQLALADEVGRFHQVLRIFA  
DTGGGLAAALRATGHSPDVLVGALFFLLVAGQETTSQFL TLLHRLSGEP  
TIRTALRAGSISVADVVEEGLRLEPPIV TWRRVAAVDSTLGGTTVAAGTS  
VLLWLARAGRDP AVVAAPDEF RPGQRGSRRH LAFGAGAHRC LGDQLARME  
AAVVVEQATPLLDGVTIVRPPWYPDNL TFRMPDAFVVR

>CYP211B2 (2571077774) *Salinispora arenicola* CNH713

MDVSEAI AVLISPSGRLDPYPTYEQ LRAHG PVSRTTAGLFVVTGYAEADM  
VLRDPRFVV LDDDLRDDVFPHWQDSPAIKSIARSMLRTNPPDHSRIRRLA  
AGAFTPRRVAAMREV VTAQADELVDEMIRAGR DGARVDFMDMFAYPLPVA  
VICALLGVPAADRSRFRRWAGDLTGILEPEITPEELAGADAGADELRDYF  
TGLIEQRRRAPADDLT TALVQAHDADGGRLSGEELLANLVVLLVAGFETT

TNLLGNGLVLLTRPEAAAAALRDVDPDLAPGYVDELLRYDSPVQLTTRTVR  
ESVSFAGTELPAWSWLLVLLGAANRDPRRFPDPARFDPGRAQSQPLSFGA  
GPHYCLGAGLARLEAQVAFPLLLRRLPELALAGRPSRRTRTLTRGYETLP  
ITVGAVTADRGTPAGVAPGTP

>CYP208A12 (2571078289) *Salinispora arenicola* CNH713

MTLDTITPRVPLGPPTAALRMLLVMKRDRLGMLTSAAARYGDASRLPVG  
HKALWFFNHPRYAKHVLADNSANYHKGIGLVHARRALGDGLLTSEGLWR  
KQRKVIQPAFQSRRIAQQAGMIAEEAFALVERLRARAGAGPVELTAELTG  
LTLGVLGRSLLDADLAGFDSIGDSFATVQDQAMFELETNLAVPMWIPLP  
QIRFRRARRKLQAVVDTLVDGRAGNLADRVDVLSRLILSARGEADPRVGR  
ERLRDELVTLLLAGHETTASTLGWTLSLIDRHGPVWERLHAEAVEVLGDR  
LPEYDDLRLRLRYTVMVVEEAMRLFPPVWLLPRRALAPDTIGEYRVANAD  
VVISPYTLHRHPEFWPNPERFDPERFAPGQAADRPRYAYLPFGAGPRFCV  
GNNLGMMEAVFVIALLCRHLRLTGVPGHRLVPEPMLSLRIRGGLPLVVRP  
VS

>CYP105CP2 (2571078628) *Salinispora arenicola* CNH713

MTKSMPVQDLPAFPIPRECPYRPSAQHVSLRSGGPMKVRLYNGRTAWLV  
TDSAHAARAVLSDYRRVSIKPYHGNYPLLNEEFKVVDSGYADVLFVGDPP  
EHTRQRQMIMPSFTLRRATAVLRPDIQRIVDDKLDVMVRHGAPGDLVTEFA  
QPVPSMVISFLLGVPWEDHEEFETPAHKLFVPELAEEATELGAYLERLI  
QKKEQPGGTPGGTGLLDDLRDHLRAGALSRLDELVHIAMAMLVAGTDTT  
NVISLGLTALLDNPDQWAALRDSPELIPGAVEEILRYTSLIEAFARVAV  
SDIELNGAVIKEGEGILISSAGVNFDPALAPDPGRFDIRRPPRPSFSFSH  
GIHRCPGDNLARLELEIAFRSLVTRMPNLRATAKPIDQIPSNNDGTLQRL  
YELPVVW

>CYP105CN1 (2571078630) *Salinispora arenicola* CNH713

MAAPAPQATPSTIPHPPSYPLPRECPYRPSAGTAHLRDAGPVSTVRLYDG  
RTAWLVGTAAEARALLADSRVSNRADFPNYPVMDERHLSMRATREMAREE  
EGGFAAALFGMDPPEHTRQRQLLLPRFTVRQVAARRPAIQRIVDEHLDAM  
EANGSPADLVSAFATPVPTMVVCTHLGVVPYQDRTRFEPVAGLFEPDRAD  
AAMAELTAYLHQLIETKQSEPGDGVIDHLIANHLRPGAIDRAELVAIASA  
ILVAGTVTTSSAIALGTLALLTAPGQYTALVDNPDLPVPGAVNEILRYLSL  
VEQLARVATEDIEIGGKLIRAGDGIIVSFAAGNLDPNVTTHPDRLDVALP  
PTNHLAFSHGIIHCIGQNALLLELDIAFRALVSRFPTLRLAVPAEQLPY  
FAGDVPRLACLPTW

>CYP107FS2 (2571078631) *Salinispora arenicola* CNH713

MPVPQGEQNLTTTEVFADPKALFATLGSRQPLHRISLPDGMFAVLVTGNRE  
ARQALSDPRLVRSITAAAPELHKYHPLASDDYALSRHMLFADPPDHGRMR  
KLVSTAFTRRRVEQMRPRIQQITDDLIDVIAAKGEADLVETLALPLPIAV  
ISEMLGVFPFADRSEFERHAEVLTGINASSGFDIAAAGRWFDEYLAGLVQ  
QRRREPQDDLISGMLAAQDKGDRDLDVELRSNALLLSAGFETTVNLIAN  
GLLALLRHPEAMAALRSEPNLMTTAVDELLRYDSPVSCVTYHFAQEPVEI  
GGFEIRSGEHVIVAAAAANHDPTVFAAPSRLDLRREGSGQILSFSHGIHF  
CLGAPLARLEGEIAFGTVLRRLAGRLAVPTDSLWVKASFVLHRLERLPV  
TFTPDRLDPNPIDSVHTV

>CYP125G6 (2571078671) *Salinispora arenicola* CNH713

VPTLLNEHVSVDGAAIAIVDSGDGATSWIRLAERVNRWVHLLRAHGLDTGD  
RLACVTGNRRETFEVLLAALHTGVTVVPVNWHLTVTEIGHILSDSGSRVV

ITEELHVKA VAAAADGTAGPVAGLV LGDREVEGF AAVEPL LAAASSAEPE  
GQVCGATMLYTS GTTGRPKGVVNNLFVTGAPYARVGRLCDYARSVLGVPR  
RERMLLDGPWYHSSQLFFALLSLLQGSRLVIRPYFDPAATLKTIDDHRIT  
VTHLVPTQLVRLLRVDALTRQMFSGASLRRVWHGGGPCPPEVKRSMIDWW  
GPVLVEYYYGATEGGVVTLIDSAEWLARPGSVGRAVPPSEVVVVDDGGQPV  
AAGQTGQVFFRRRTGNRFHYHNAPEKTQAAYLAPDTFTTYGEVGHVDEDGY  
LFLTGRAQDMIVSGGVNVYPAEVEAALLRHPVVRDAAVIGVADDEFGERV  
VGIVVPETA VDPDDLATHLDAHCRVSLAGFKVPRTYRVVESLPRDETGKL  
RKDALRSKFGWLSGAAMTVPRPATGQPTAHRPDIAHPTTYVSGVPHDEFA  
RRRDEPVGWVAEPVLTRHTAAGRTATRGSGFWAVTRYEDVVAASRRVTD  
FSSAAKGAF L TDPRTADLQQARQLLVNMDDPHHARLRKLVTSVFTPRAV  
RGLLASIDAHAAALVAKVVAAGEFDVVTDLAAELPLLVLADLLGVPKQDR  
ALLYGWSNHLVGFD DPDFGGGDIDAYRTAMAEAFQYALNLGVERRARPTD  
DLVSLLANAEVDGTRLTDREFCNFWLLLVVAGNETTRHLVAGTMQALTEH  
PGE CARLVEGHVPMESAVEELLRWVTPIMQFRRTATRDTEIGGQAVTAGE  
KVVLYYTSANRDATVFSEPDRLDLGRTPNRQLSFGIGPHYCLGAHLARAE  
LTALLRVMSPHLGSLQLTG PVSRLASNFVNGVKAMPAVIGSR

>CYP154M15 (2571078696) *Salinispora arenicola* CNH713

MNDKCPFAALDVTGQDLHG EAARLREQGPAVLVELPGGVKAWSINRYEVI  
RELLMDRRVTKNARKHWP AFIKGEIPPDWEMISWVAMDNMVTAYGKDHVR  
LRKLVGRAFTQRRADALRPQVVALSTKLLDDL GATPPGEVVDLRERFAYP  
LPAMLVASLIGMSEAAALACSKVIDMMVHTNVSPEEAQAVLQGWRAAMAD  
LIESKRRTPGEDITTDLIAAREEDGSRLSEAELADTIFAILGAGSETTIN  
FFDNAITALLSRPGQLQLLRTGAVTWDDVIDEVL RVESPLAHLPLRYAVE  
DIELDGVTIPQGDPI LVNYAAAGRDPALHGGTADEFDLARGDKTHLSFGY  
GPHYCLGAGIARMVATIGLSMLFERFPDL SLAVPATELKRLP T FIMNGHQ  
TLPVRLTAHAR

>CYP107FJ2 (2571078715) *Salinispora arenicola* CNH713

MSETLSTSVLLADAAEQRAWRAKL RGAGPVHRITTSGETGWLIVGHEEA  
RNALVDLRLQGR TATVGHGRMPEDLERALNSHMLNVGPPDHTRLRLRLVS  
AAFTRRRIEQMRPRIQELTDELLDGLAGADEADLVAGLALPLPMRVLVDL  
FGIPAEDCADFNVT KVLTSAGAVDLDRLT TAAGEMVAYLRGLLDRKRQV  
PESDLLSALVAVRDGADRLSDEL TSMVYLLLTAGYETTVNLIGNGLLNL  
LANPEQLVAFKADPDLLPQVVVEEAMRFDSPVQI AVRHSTEPVEIAGQAIP  
SGALILVSL LWANRDPDRFTDPETFRVDRQDN PQLGFGYGFHHCIGAPLA  
RMEGTIAIGTVIRRF PALRLAHPAGSLTWRASMVMHGLTALPVHLR

>CYP154M20 (2571078721) *Salinispora arenicola* CNH713

MERCPYVLDRAGRDLHG EAALRARGPVT LVELHG GYTAVSVTSYEIAKQ  
LLVDPRISKNTKETWPEFREGKVPQDWELYTWVAMDNMQTRDGEEHDRLR  
KLVAQAFTTRQVAKVRPMIEDIVDRLDDLEKVPAGEVVDIKGRYFYPLS  
TILVCDLLGIPEADRAEALHGTAVNAKTTNSAESEANLHQWQSALSKLV  
ETKRREPGNDITTLIIKAREDEQA PLTDDEVIGSLHLLIGGGTETTSNVL  
CNTLIDL LTHPDQMAMIRSGAVGWEEAWE EEEVRKDGAVGSM PFRCANADI  
EIGGV TIAKGDVLV LINYAAAGRDPERYGDTTAEFDITRADKTNLSFGYGR  
HRCLGPALATMEAMISLPALFERFPDLILAVPRDELKPQGTFFVNGYAEV  
PMLLRS

>CYP248A2 (2571078742) *Salinispora arenicola* CNH713

VLADAVTAFDPTAVDVRRDPYPSYHWLLRHDPVHRGAHQVWYVS RFADVR  
AVLGDERFARTGIRRFWTDLVGPGLLSQIVGDIILFQDEPDHGRLRGVVG

PAFSPSALRRLEPTIEATVNDLLRPARALGAMDVVADLAYPLALRAVLEL  
LGLPAGDANAVGRWSRAVGRTLDRGATAEDMRRGHAAIAEFADYVERALA  
ERREDGADLLALMLAAHRSQMLSRNEIVSTVVTFFITGHETVASQLGNGL  
LSLLDHPEQMELMRRQPHLVPQAVEECLRFDPVQSNTRQLAADVELHGR  
RLRRDDVVVVLAGAANRDPGRYDRPDELDIRRDPVPSMSFGAGMRYCLGS  
YLARLQLRTALGAMVALPDLRLVCSPNELAYQPRTMFRGLTRLPVAFTPA  
G

>CYP105W2 (2571078750) *Salinispora arenicola* CNH713

MTGYQDRPTGDQPGTPVPSGSTDPGIGAFPLPRRCPPSPPAEYARLRAEH  
PVVRLPMLGGDTAWVVSRAHADVQVLSDFRMSADRRRPGFPGFAPTEGQ  
RQASFANFRPPLNWLDPPEHAICRRQIVDEFVSRRVRQSRALVERVVDTH  
LDALTAAPGADLVSTFAYPVPSQVICEVLGVYPYGEHEFFERRSTLMFRR  
STPADERARCAREIRDFLDVVVTDKEHRPGDDVLSRLLYRQRRAGGVDHE  
AVVSMAFVLLVAGHVTTSNMLALSVLALLTHPARLARLRAEPERFPAAVE  
ELLRYFTVVEAATARTATAEVTIGGVTTAAGEGVVALGQAANRDPRVFEH  
PDEFDPDRDARAHAFGHGRHICPGQHLARLEMEVALSRLFRRLPGLRLT  
MEVSDLPLKEDSNIFGLYALPVAW

>CYP154M13 (2571078763) *Salinispora arenicola* CNH713

MSTGRPVVLDPTGRDIHGEADHLRALGPATLVELPGGVLAWSINSYEVGK  
ALLSAPNVSKSARRHWPAYNGEIPPDWEMISWVAMDNISTTFGGDHRRL  
RRLTAKAFGSRRAEQVRPMATHMVNTLLDRMADAADAGEVVDLKAFAFYP  
LPGMLVAELIGMSEEARVAAKVIDMMTATNITPEQAQGVLLGWRDAITD  
LIAALKRAQPGDDITSDLIAARDEDGSLLTEQELVDITIFAILGAGSETTIN  
FFDNAITQLLTHPEQLELVKSGQVSWDDVIEEVLRLLESPLASLPMRFAVE  
DIQLDGVTIHRGDPILINYAALGRDPALHGESAGVFDVTRQHKEHLSFGH  
GAHYCLGAGIARMVAKTGLSALFERFPRMTLAVSAKDLVPYPTFIMNGNR  
QLPVHLSGALTWREGEQSALGRA

>CYP107Q4 (2571078829) *Salinispora arenicola* CNH713

MTTTAETS AETIDLFSPEVVADPFGWYARLREETGPTTGTNLNIGTMMGGP  
EMWLVTTRYEDVRQVLTDPFRFLTNPADSPLEDIRAGVFKRLDFPPDLIPW  
MANLLNVSDGEDHTRLRLKLVSYALTAHRIGKLRPRVEKITADLLDKLAED  
GKDGSPVDLVEEYCYPLPVTVICELVGIDEPRPHWRAGDSMATMNGER  
IPTTLVKCIELARELIAKRRAPQDDLVTALVQAQAEQDNRVSDDEIIGI  
LFSLVTAGHQTTTYLIGNSVILLLENPDQLVRLKENPSMWPQAVRELQRL  
GPIQFAQPRFPSEDIELGGVTIPRGAPVAPLLLAANTDPRRFPDPNKLI  
DRLAVGSEGLHGFKGKGIHRCLGQHLAYQEAEEVALQGLFTRFPDLSLAVPR  
EEIPWILRPGFTTRTRLPLKLV

>CYP105G5 (2571078830) *Salinispora arenicola* CNH713

LTIIETTETPPADDSLRAPLPRQFMQRDDPSKLPALAAALAEQSPVGRSTL  
PDGDPFWMVSGYDEARAVLSDPRFSSDRFRYHPRFKKLSGQLGERLRNDK  
ARAGSFINMDPPEHTRYRKLLTGQFTVRRMRQLTVRIEQIVTEQVDVMLA  
EGNSADLVSAFAVPVPSLMICELLGVRYEDRTEFQRRAGLLQTDLPKQ  
AVENLEAQRAFMQRLVTDKRRTPADDMISGLVHHAGAEPPLTDEDELVGIA  
TLLLLFAGLDTTASMLGLGMFMLLQRPEQMAVLRDDPSRIGDAVEELLRYL  
TVVSTGLFRFAKEDVVLGDEHYPAGSTVVVSLMAANRDGRHWPEPETLDV  
TRVRSSHLAFGHGVHQCLGQQLARIELTVGITELLRRLPNVRLAVPPADV  
PLRNDMITYGVHRLPILWDTF

>CYP1051A1 (2571078850) *Salinispora arenicola* CNH713

MATDAAITRARTVPAWKALPAAVRDTHRALVDVGNWSDGDVVRVSLGVSR  
PYLVTNPAHVQEVLHERAAIYPRGDDTALWRSVRKLVGDGILAEGDAWAA  
SRRVLAPMFRPARINAMVDTMADAIAGAVDDLHGAATAGTPIDVGRELSR  
IVCSAIMRVFFADRITVRDALRIMKAQETIVTAMAPRILAPLVPWWIPMP  
GDRRFRAAVRSIDDILLPVLRLQAQRQPDDGDDLLSRLVRARADDGQALSE  
KRMRDDLVSMVAVTETSTVVLTLWLWPLLANHPDVANRLYDEIDRVVGGG  
PVRGDHLAELTYTRMVLDELLRLYPAGWILPRRAATDVLGGVRINKGAT  
VILSPYVTQRMATAWWGPTAEAFDPERFAAGREAADGRHRYAYYPFGVGMH  
RCLGEHLFNLEAILIVATLLSRFRFALTDTSMPGVKVAASTRPARTVEMI  
LKPVAPVPAR

>CYP244A4 (2571079204) *Salinispora arenicola* CNH713

MSTTTNTELTEAPETNMPVDPGLFDCMPDLIAAARVAPVVRIPYLGRHAW  
VVCDELVKQALTHPKMGKDITLVPWWMRQPGLMVTAQPDPEYARAMIMS  
DGENHARIRRIHAPVLSRPNTERWGERVADKVEGFLELSQAGSGGSTEV  
NVVTNYTHKIPLAFISEMLGLPPEAEHRLRGITDIMLYSSDYAARREAIG  
GLFGAVEDWVRNPADLRDGVITGLLAASDGPDAAVTEGEVIVWTLGMIIT  
GYETTGSLLISTSLYEAIIRPPHERPKTDEDITAWIEETLRVHPPFPHPWT  
RFPLEDIELGGYLIPKGAPVQVSIAAANRKPGEAGDSFDAERRGHGHLSE  
GLGMHYCIGAPLVRLEAQIAVRGFLRRFPQARLSAETAVQWESEWMIRRM  
SVLPAVLS

>CYP245A7 (2571079208) *Salinispora arenicola* CNH713

MPSATLPRFALTGWSRENIVNPYPVYQRYREVASVHRGEPGGDAPDTFYV  
FSYDEVVQVLSSNCFGRGRSLDAAKASVPVPAEQKALRAIVENWLVFMDP  
PRHTELRLSLNRSFSPRIVTELPRPRIARIAQELLSRLGQQVDVDLVESFA  
APLPILVISELLGIPEERRAWLRANALALQEASSSRAGRDVDGYARAEVA  
AQEFTEYFREQVRLRRGRAGGDLITILANAQQRGAPVSLDAIVGTCVHLL  
TAGHETTTNSLAKAVLALREHPAVLDELRGAEGLTTDAVEEFLRYDPPVQ  
AVTRWAHQDITLGGCDIPRGSRVVALLGSANRDPARFSPDVLVDVRRPAD  
RHLSFGLGIHYCLGATLARAELEIGLQALLDGVPRTLGYGTQHVDYADDLV  
FHGPSRLVLVNLGERCT

>CYP107EU1 (2571079293) *Salinispora arenicola* CNH713

VTIGQTLPLDLYVSPEFTRDPYAIFARLREQAPVCRVTTHRGMSAWMVTRH  
ADVRALLADSRLAKDGNRIGELMPRHSTLTGAATGFPPGLTTNMVNSDPP  
DHTRLRHLVGREFTGHRVEGLRPRIEEIVDDLLDGVAACGDEADLAETLA  
RRLPIAVIGELLGVPEADRAEFFCWADTLYGGTASPEALGQAYNAIVDYL  
GRLCDAKRDPADDLLTALVQVSADEDRLSREELVSMALLLVAGHETTS  
KQISNGVLALLLNPEQLKLLKAQPARTAGAVEELLRFEGPSLSASLRFTT  
EPVEVAGVVIPEGEFVLLSLASGNRDPEKFPDPDRLDITRSTQGNLAMGH  
GIHHCVGAALARLELEIVLSRLVARFPQMQLAVEADDLEWLVNSFFRAPL  
HLPVSLRR

>CYP107AY2 (2571079494) *Salinispora arenicola* CNH713

MTAEPTPIPRSGARLGQEYDQLRKTGDVHQVLLPDTSLAWLVTNPEVAAR  
ALADPRLALNRRNSRGGWSGFALPPALDANLLNLDAPDHTRLRLRLVGPAP  
SPQ RVAALRPGIRRAAGHLLDTLVATSGPTDLVTGYCNPLSVQVIADLMG  
VPEAGRTNLRAWTDMLTSYPPDRDAIRRAVTELHGYYVDLIDIKQQQPG



DDLLSTLVETIEQDGDRLSRDELTSIAFLILFAGYENTANLIASAVLWLLD  
HGGLNVVPISEAIEGTLRHEPPAPVAIRRFPTEDIIIGGVITIPAGDTVLL  
SVAAATRGADGNAARLAFGNPHYCLGAALARVEAEEALTVLARRLPGLT  
LAVPPSQVRWRPTFRTHGPAELLVGW

>CYP1198B1 (2571080633) *Salinispora arenicola* CNH713

MSGELTDQRTAPGAGGNPLRSLMDHGIRANPYPLFGELREAGPTAVEDGS  
VVLFGGEYHCSQILRHRDMGSDTSEAPSIKGFVVDDAERAGSSIFFMDQP  
GHGRQKRLVSKSFTPRIVKSFGPQITHIVDGLFEDFRDRGELDVVTDLAY  
PVSIGIICDLFGIPDDERDMLKEWSDDLALSTELPTLGAAIGVLNVFTRD  
EINRFGSVAMAAHAYFADLIHRRRKNPGDDLVSLLATESNGERLTRFEV  
TSVLATLFVAAHESTTNLISGGILALLRNQDQMAVLRENPGITNVVDES  
LRYDPPVHLAARMARARTTIGGYDLDPGTIVVVLMAAGNRDPAYESP  
FDVNRKIRNVSLAFGAGAHFCIGSGLAKLEAEIAISAFQRLKNPEVDES  
SLEYRRHIVVRGLEHMKVSFQP

>CYP154M21 (2571078764) *Salinispora arenicola* CNH713

MEKCPYVLDRAGSDIHKEALNLRARGPVTLVELHGGYTAWSVTSYEVAKQ  
LLMDPRISKNTKAHWPEFRDGNVPQDWELYTWVAMDNMQTRDGKEHDLRL  
KLVAFAFTGRQAVKSRPIIEEIVNRLDDLETAPRGQAVDIKARYFYPLS  
TILVCDLLGIAEEDRDVILHGNVNSKTTNTAESEANLHQWQTALGRV  
ETKRDPGDDLTTVIIKAGEDEQAPLTDDEVIGSLHLLIGGGTETTANVL  
CHTVVMDMLTHPDQLAMVRSGAVSWESAWEVEVRKDGAVGSMFRCATDDV  
EIGGVITIAKGDVLVLINYAAAGRDPERYGDAAAEFDITRADKANLSFGYGR  
HRCGLPALATMEAMVALPALFDRFPNLALAVPPNELKPKQGTFFNGYAEV  
PLLLRS

>CYP166A4 (2524589595) *Salinispora arenicola* CNH963

MTYAISFELPWARTDKFDPPAVFDALREQRPLARMRYPDGHVGVIVSSYE  
LVREVLGDPRFSHSCAVGHFPVTHQGQVIPTHPQIPGMFIHMDPPEHTRY  
RRLLTGEFTVRRTSRLTGHVEGVATEQIEVMREHGAPADLVATFARPLVL  
RVLSGLVGLPYGERDRYLHAVTLLHDAEADPAEAAAAYEQAGAYFDEVIE  
RRRRQPEDDLISTLVGDGELTGEELRNIVTLLLFAGYETTESALAVGMFA  
LLYHEDQLARLRADPTKIDAAIEELLRYLTVNQYHTYRTASEDIELHGEV  
INKGDSVTVSLPAANRDPARFACPADLDIDRETSGHVAFGFGIHCCLGQN  
LARVELRAGLSALLRAFPNLRLAVPADEVPLRLQGSVFVKNLPVCW

>CYP107Q4 (2524589604) *Salinispora arenicola* CNH963

MTTTAETSATIDLFSPEVVADPFGWYARLREETGPNTGTNLIGTMMGGP  
EMWLVTTRYEDVRQVLTDPRLTNPPADSPLEDIRAGVFKRLDFPPDLIPW  
MANLLNVSDGEDHTRLRLKLVSYALTAHRIGKLRPRVEKITADLLDKLAED  
GKDGSPVDLVEEYCYPLPVTVICELVGIDEPRPHWRWAGDSMATMNGER  
IPTTLVKCIELARELIAKRAEPQDDLVTALVQAQAEQDNVSDDEIIGI  
LFSLVTAGHQTTTYLIGNSVILLLENPDQLARLKENPSMWPQAVRELQRL  
GPIQFAQPRFPSEDIELGGVTIPRGAPVAPLLLAANTDPRRFPDPNKLI  
DRLAVGSEGLHGFKGKIHRCGLGQHLAYQEAVALQGLFTRFPDLTLAVPR  
EEIPWILRPGFTRTRTLPLKLV

>CYP105G5 (2524589605) *Salinispora arenicola* CNH963

LTIETTETPAADDSLRAPLPRQFMQRDDPSKLPPALAAAEQSPVGRSTL  
PDGDPFWMVSGYDEARAVLSDFRFSDFRYHPRFKKLSGQLGERLRNDK

ARAGSFINMDPPEHTRYRKLLTGQFTVRRMRQLTVRIEQIVTEQLDVMLA  
EGNSADLVSAFAVPVPSLMICELLGVRYEDRTEFQRRAGLLQTDLPKQ  
AVENLEAQRAFMQRLVTDKRTTPADDMISGLVHHAGAEPPLTDDDELVGIA  
TLLLFAGLDTTASMLGLGMFMILLQRPEQMAVLRDDPSRIGDAVEELLRYL  
TVVSTGLFRFAKEDVVLGDEHIPAGSTVVVSLMAANRDGRHWPEPETLDV  
TRVRSSHLAFGHGVHQCLGQQQLARIELTVGITELLCLLPNVRLAVPPADV  
PLRNDMITYGVHRLPILWGTP

>CYP1051A1 (2524589629) *Salinispora arenicola* CNH963

MATDAAKARARTVPAWKALPAAVRGAHRALVDVGNWSDGDVVRVSLGVSR  
PYLVTNPAHVQEVLHERAAIYPRGDDTALWRSVRKLVGDGILAEGDAWAA  
SRRVLAPMFRPARINAMVDTMADAIAGAVDDLHEAATAGTPIDVGRELSR  
IVCSAIMRVFFADRITVRDALRIMKAQETIVTAMAPRILAPLVPWWIPMP  
GDRRFRAAVRSIDILLPVLRQAQRQPDDGDDLLSRLVRARADDGRALSE  
KRMRDDLVSMAVTTTETSTVVLTWLWPLLANHPDVANRLYDEIDRVVGGG  
PVRGDHLAELTYTRMVLDELLRLYPAGWILPRRAATTDVLGGVRINKGAT  
VILSPYVTQRMATAWWGPTAEAFDPERFAAGREAADGRHRYAYYPFGVGMH  
RCLGEHLFNLEAILIVATLLSRFRFALTDTSMPGVKVAASRTPARTVEMI  
LKPVAPVPAR

>CYP211C1 (2524589891) *Salinispora arenicola* CNH963

VVDVEELLTRYLSAQGRQDPFFVYADLHAQGPIAALPPEPERRRVAAVAV  
GYDLVGAVLRDPEWSKAPPPGWTEQEILRTLQTSMMFINPPDHGRMRHVF  
AGTFTPRRLGALEPVVNRVADELDRMADAGAGGLDFVAEFAYPLPARVM  
AEFIGIPETELDWYRERVVIDAFLDVAGKTPQRLAAANAAGAELEAFY  
ELLAHRRRTPGEDLISGLLEAVDAGGVELTEDELVSNLIVLFNASFVTV  
YMLSNGLPVLLAHPEVAAAALATDPVLTAGAVDEILRLQAPVHLLARAAPR  
DTVLGGVPIPPQGNVLLLIAAAANRDPAHFPDPDRFDPRRSGPPSLAFGLG  
LHYCLGAAVSRLEGRALPRLLSRFPRLRIMEQPVYSGSLFLRGIDKLSV  
SPGEGSTRE

>CYP125A41 (2524590039) *Salinispora arenicola* CNH963

MTEPRIPAGFDFTDPEVLAHRVPREEFAELRRTAPVWWNAQPRGSAGFDD  
DGYWVVTRYADVMTVSRSDTYSTRENTAIARLRPDTTREDIEMQRVIML  
NVDPPHEHTKLRAIVSRGFTPRAINALRGSLAERAHIVRDAAVRGVGFV  
TDVACELPLQAI AELIGVPQHRRKVFWDWSNQLIGYDDPAYGTDPLTASA  
ELLAYAMEMAEERQSPSDDLVTKLVAQIDGEHLTTDEF GFFVMLLAVA  
GNETTRNAITHGMVAFLDNPEQWELFKAERP KSAVEEII RWATPVNVFQR  
TALVDTVLGGQAI SAGQRFALFYGSANFDEAVFEDPERFDITRSPNPHLG  
FGGSAHFCLGANLARLEIELIFNSIADHLPDIRKVAAPQRLRSWINGI  
RQMPVRYR

>CYP211B2 (2524590117) *Salinispora arenicola* CNH963

MDVSEAVAVLISPSGRLDPYPTYEQ LRAHG PVSRTTAGLFVVTGYAEADM  
VLRDPRFVVLDDDLRDDVFPHWQDSPAIKSIARSMLRTNPPDHSRIRRLA  
AGAFTPRRVAAMREVVTQAQADELVDEMIRAGRDGARVDFMDMFAYPLPVA  
VICALLGVPAADRSRFRRWAGDLTGILEPEITPEELAGADAGADELRDYF  
TGLIEQRRRAPADDLTALVQAHDADGDRLSGEELLANLVVLLVAGFETT  
TNLLGNGLVVLTRPEAAAAALRDEPD LAPGYVDELLRYDSPVQLTTRTVR  
ESVSFAGTELPAGSWLLVLLGAANRDPRRFPDPARFDPWRAQSQPLSFGA  
GPHYCLGAGLARLEAQVAFPLLLRRLPELALAGRPSRRTRLTLRGYETLP  
ITVGAVTADRGTAGVAPGTP

>CYP245A7 (2524590355) *Salinispora arenicola* CNH963

MPSATLPRFALTGWSRENIVNPYPVYQRYREVASVHRGEPGGDAPDTFYV  
FSYDEVVQVLSSNCFGRGRSLDAAKASVPVPAEQKALRAIVENWLVFMDP  
PRHTELRSLLNRSFSPRIVTELPRPRIARIAQELLSRLGQQVDVDLVESFA  
APLPILVISELLGIPEERRAWLRANAMALQEASSSRAGRVDVGYARAEVA  
AQEFTEYFREQVRLRRGRAGGDLITILANAQQRGAPVSLDAIVGTCVHLL  
TAGHETTTNSLAKAVLALREHPAVLDELRGADGLTTDAVEEFLRYDPPVQ  
AVTRWAHQDTTLGGYDIPRGSRVVALLGSANRDPARFPSPDVLVRRPAD  
RHLSFGLGIHYCLGATLARAELEIGLQALLDGVPTLGYGTQHVDYADDLV  
FHGPSRLVLVNLGERCK

>CYP244A4 (2524590359) *Salinispora arenicola* CNH963

MSTTTNTELTEAPETNMPVDPLFDCMPDLIAAARVAPVVRIPYLGRHAW  
VVCDELVKQALTHPKMGKDIALVPEWMPQGLMVTAQPDPEYARAMIMS  
DGENHARIRRIHAPVLSRPNTERWGERVADKVEGFLELSQAGSGGSTEV  
NVVTNYTHKIPLAFISEMLGLPPEAEHRLRGITDIMLYSSDYAARREAIG  
GLFGAVEDWVRNPADLRDGVITGLLAASDGPDAAVTEGEVIVWTLGMIIT  
GYETTGSLLISTSLYEAIARRPPHERPKTDEDITAWIEETLRVHPPFPHTW  
RFPLEDIELGGYLIPKGAPVQVSIAAANRKPGEAGDSFDAERRGHGHLSE  
GLGMHYCIGAPLVRLEAQIAVRGFLRRFPQARLSAETAVQWESEWMIRRM  
SVLPAVLS

>CYP154M14 (2524590516) *Salinispora arenicola* CNH963

MRRRCPVVIDPAGTDIHAEGARIRTNGSVSQVELPGGVLAWSVTGQQAAR  
QVLSDQRFKSKDPRKHWTDYLDGRIGQDFPLIGWVMDNLTAYGSDHSRL  
RKPCAQAFTPRRVQALRPAVERAAVELLDGLAMLSPTESVDLKARYTHPL  
PSRVICDLFGVPEEDRAEMLRGGEVNVDTRVSAEEAAAANVERWHQQMLDF  
IANKRQNPQPDLTSDLVAAQEAANGSRLTDSEMVGTLHIMLATGTEPVKNL  
ITNAVFALLTHPDQLYLLRTGRAGWDDVIQETLRVQAPVAHLPPFRFAVED  
VEIDGVTIGRGDPLLVNFAAIGRDPEVHGETAAEFDI TRADKEHLSFGQG  
VYRCIGQPLALLEAEVALRMLFQRFPNLMLAVPPEEVTPQPTFIMNGLDT  
LPVLLKECA

>CYP105BL2 (2524591183) *Salinispora arenicola* CNH963

MSSHSAAPDPVTATPLHTLAPELTFPQFERSTPFDPPQAYTELSGRCPV  
APVSMADGKPSWLITSFEGVRTTSLDPRFSSDMSHPGFNRTGKPVDDL  
KDTLGAMDGERHRYRRLTGELTVRRAKAMRPVITRITDEALDQLAAAG  
PGADLVKHVAFVVPSPRVACHLVGIPLSDYELFTGMAATLMDSTSSDDQFA  
ALQNMVSYFDTLVTDREHHDRDDLGHMVRRYLATGELTRDMLIRLAWTT  
MAAGQETTAHMI GLGVAALLRHPDQLELLRREPHELLPGAVDELMRYLPLI  
QFGIPRVATDDVEVDGQTVTAGEGVVALPPLANRDPVFERPDELDVRRN  
ARQHLTFGYGPHQCPAHALARLELEVYGRLLERFPTLRLADSDADLKVQ  
DKDIMYRVSELAVTW

>CYP105CP2 (2524591304) *Salinispora arenicola* CNH963

MTKSMPVQDLPAFPIPRECYPYRPSAQHVSLRSGGPMKVRLYNGRTAWLV  
TDSAHAARVLSYDYYRVSIPYHGNYP LLNEEFKVVDSGYADVLFVGDPP  
EHTRQRMIMPSFTLRRTAVLRPD IQRIVDDKLDMMRHGAPGDLVTEFA  
QPVPMSMVSFLLGVFWEDHEEFETPAHKLFPVPELAEEATTELGA YLERLI

QKKEQPGGTPGGTGLLDDLIIRDHLRAGALSRDELVHIAMAMLVAGTDTT  
NVISLGLTALLDNPDPQWAALRDNPDDELIPGAVEEILRYTSLIEAFARVAV  
SDIELNGAVIKEGEGILISSAGVNFDPALAPDPGRFDIRRPPRPSFSFSH  
GIHRCPGDNLARLELEIAFRSLVTRMPNLRATATPIDQIPSNNDGTLQRL  
YELPVVW

>CYP105CN1 (2524591306) *Salinispora arenicola* CNH963

MAAPAPQATQSTTPHPPSYPLPRECPYRPSAGTARLRDAGPVSTVRLYDG  
RTAWLVGTGAEEARALLADSRVSNRADFPNYPVMDERHLSMRATREMAREE  
EGGFAAALFGMDPPEHTRQQLLLPRFTVRQVAARRPAIQIRIVDEHLDAM  
EANGSPADLVSAFATPVPTMVVCTHLGVYPYQDRTRFEPAVAGLFEPDRAD  
AAMAEALTAYLHQLIETRQSEPGDGVIDHLIANHLRPGAIDRAELVAIASA  
ILVAGTVTTSSAIALGTLALLTAPGQYAALVDNPDLPVGAVNEILRYLSL  
VEQLARVATEDIEIGGKLIRAGDGIIVSFAAGNLDPNVTTHPDRLDVALP  
PTNHLAFSHGIIHCIGQNLALLELDIAFRALVSRFPTLRLAVPAEQLPY  
FAGDVPRLACLPVTW

>CYP107FS2 (2524591307) *Salinispora arenicola* CNH963

MPVPQGEQNLTTTEVFADPKALFATLGSRQPLHRISLPDGMFAVLVTGNRE  
ARQALSDPRLVRSITAAAPELHKYHPLASDDYALSRHMLFADPPDHGRMR  
KLVSTAFTRRRVEQMRPRIQQITDDLIDVIAAKGEADLVETLALPLPIAV  
ISEMLGVFPFADRSEFERHAEVLTGINASSGFDALIAAGRFDEYLAGLVQ  
QRRREPQDDLISGMLAAQDKGDRLTDVELRSNALLLSAGFETTVNLVAN  
GLLALLRHPEAMAAALRSEPNLMTTAVDELLRYDSPVSCVTYHFAQEPVEI  
GGFEIRSGEHVIAAAAAANHDPTVFADPSRLDLRREGSGQILSFSHGIHF  
CLGAPLARLEGEIAFGTVLRRLAGRLAVPTDSLWVKASFVLRHRLERLPV  
TFTPDRAPNPIDSVHTV

>CYP105J4 (2524591654) *Salinispora arenicola* CNH963

MTDSVAFFPQGRVCPHQAPAGYRPLAAQSRSLAQVTLYDGRRVWAVTTRDLA  
RRLVDPRISSDRNTNPAWPAIVPIVAAAVNDAQQKVLRIATALVGTGPE  
HKAQRRMLIPSFTRFRMNALRPMIQEIVDQQLEMIKSGAPTDLIPAFAS  
AVPVTVLYRLMGIPDDDHGIFEKLSHQLLAGPHANEAYDQLMDYMSLVA  
ERRRNPGEVLDLLAQHGANDVDHDELVSTLVVQVAGNHGTTGSMIAL  
GLFALLQHPEQLAELRANPSLMPTAVDELLRFLSVPDAVTRLAADDIEVE  
GTIIRKGDGVFFITSLINRDTDVHDAPNSLGWHHASADHLTFGFGAHQC  
LGQSLARITMEIALGALIDRLPSLRLAVPAEEVPFLPAASLQVMAELPIT  
W

>CYP208A12 (2524591937) *Salinispora arenicola* CNH963

MTLDTITPRVPLGPRTAALRMLLVMKRDRLGMLTSAAAARYGDASRLPVG  
HKALWFFNHPRYAKHVLADNSANYHKGIGLVHARRALGDGLLTSEGLWR  
KQRKVIQPAFQSRRIAQQAGMIAEEAFALVERLRARAGAGPVELTAEITG  
LTLGVLGRSLLDADLAGFDSIGDSFATVQDQAMFELETNAVPMWIPLPR  
QIRFRARRRKLQAVVDTLVDGRAGNLANRVDVLSRLILSARGEADPRVGR  
ERLRDELVTLLLAGHETTASTLGWTLSLIDRHGPGVWERLHAEAVEVLGDR  
LPEYDDLRLRLRYTVMVVEEAMRLFPVWLLPRRALAPDTIGEYRVANAD  
VVISPYTLHRHPEFWPNPERFDPERFAPGQAADRPRYAYLPFGAGPRFCV  
GNNLGMMEAVFVIALLCRHLRLTGVPGYRLVPEPMLSLRIRGGPLVVRP  
VS

>CYP107AY2 (2524592157) *Salinispora arenicola* CNH963

MTAEPTPIPRSGTRLGPEYDQLRKTDGVHQVLLPDASLAWLVTNPEVAAR  
ALADPRLALNRRNSRGGWSGFALPPALDANLLNLDAPDHTRLRRLVGPAF  
SPQ RVAALRPGIRRAAEHLDDTLVATSGPTDLVTGYCNPLSVQVIADLMG  
VPEAGR TNLRAWTD TMLTSYPPDRDAIRQAVTELHGYVVDLIDIKQQQPG  
DDL LSALVTIEQDGDRLSRDELTS LAFLILFAGYENTANLIASAVRWLLD  
HGGLNVVPISEAI EGT LRHEPPAPVAIRRFPTEDIIIGGV TIPAGDTVLL  
SIAAATRGADGNAARLAFGNPHYCLGAALARVEAE EALT V LARRLPGLT  
LAVPPAQVRWRPTFRTHGPAELLVGW

>CYP105AB36 (2524592262) *Salinispora arenicola* CNH963

MTEAASSRLTDTEFPVQRQCPFAEPVEYEQIREQSSIAMVRLTGGEAWW  
ISGHEQGRAVLADRRFSSDRKANFPFVSTDPATRKRLHAQPLSMISMDG  
AEHAQARRALIGEFTVRRLAALRPRIQQIVDQCIDEMLTDDQHCVDLVKA  
LSLPVPSLVICELLGV PYDDHDFQEH TATLVRRNTAPEVRQHCVDELNA  
YLGALIDRKLANPDDDLGRQIARQH QDGT FDRASIVSLAFLLLVAGHET  
TANMISLG VVGLLQHPDQLTMIKKDPDKVPLAIEELLRFFTIVDSVTSRV  
ATEDVRF GDTTINAGDGVVVSGLSADWDPTVFADPDRLDLERGARHHIAF  
GFGPHQCIGQNLARLELQIVFDTLFRRIPTLRLAAPLDKIPFKTDAAIYG  
ARELPVAW

>CYP1005A1 (2524592506) *Salinispora arenicola* CNH963

MTAGTRWPDVTRVADQSGTEHLVVTRHALVRQVLT DQATYRPD NALEAVT  
PVPVAALRVLAGHRFRLLPPTLANNGGVSHPAIRALVADTLHPTKVAAQRP  
WLTGLVADR VATIRTTLD SGGPVDLYADLTADLPLLV LARLVELPDAPVN  
AVKQFARA ALELFWAPLDADRQLALADEVGRFHQV LREFADTGGGLAAAL  
RATGHSPDVLVGALFFLLVAGQETTSQFL TLLLHRLSGEPTIRAALRAGS  
ISVADVVEEGLRLEPPIV TWRRVA AVDSTLGGTTVAAGTSVLLWLARAGR  
DPAVVAAPDEF RPGQRGSRRLAFGAGAHRC LGDQLARMEAAVVVEQATP  
LLDGVTVVRPPWYPDNL TFRMPDAFVVR

>CYP105CT1 (2524592760) *Salinispora arenicola* CNH963

MNSPNHMPADRSLTAPASGCPMALSRGRVGLDVADEISELRDGGRLGRIT  
TAFGQEATLITRYDEVRAQMADSVVFN VAGVSPSPALVDGGFDTESVRRR  
RTVGNLIMLDPPEHTRLRRMVAAWFTTRRVERLRPRVVEIIDAA LDEMER  
SGPPVDLVAMFAKTVPITVICELIGVPEELRERYRRRAERAVSASAVSTP  
LDELRLREAGWVSRELIEYHRENPSDDIIGMLLREHGTD SHDDGITDDE  
LVGLANALLIAGHETTTQMLSMGTLALLRHPDQLALLRDDPSIVAGAVEE  
LLRYVGVLHGGFVRVATRDTRLGGHRIHAGELVVPALTAANRDPRLT DG  
DRLDITRPPTSHVAFGHGVHFCIGAPLARMELREAF PALLRFPGLRLAV  
PDSELEFTQGT TVYSLRGLPVTW

>CYP248A2 (2524592816) *Salinispora arenicola* CNH963

VLADAVTAFDPTAVDVRRDPYPSYHWLLRHDPVHRGAHQVWYVSRFADVR  
AVLGDERFARTGIRRFWTDLVGPGLLSQIVGDIILFQDEPDHGRLRGVVG  
PAFSPSALRRLEPTIEATVNDLLRPARALGAMDVVADLAYPLALRAVLEL  
LGLPAGDANAVGRWSRAVGRTLDRGATAEDMRRGHAAITEFADYVERALA  
ERREDGADLLALMLAAHRSQ LMSRNEIVSTVVTFIFTGHETVASQLGNGL  
LSLLDHPEQLELVRRQPHLV PQAVEECLRFDAVQSNTRQLAADVELHGR  
RLRRDDVVVVLAGAANRDPGRYDRPDELDIRRDPVPSMSFGAGMRYCLGS  
YLARLQLRTALGAMVALPDLRLVCNPNELAYQPR TMFRGLTRLPVAFTPA  
G

>CYP105W2 (2524592824) *Salinispora arenicola* CNH963

MTGYQDRPTGDQPGAPVPSGSTDPGIGAFPLPRRCPPFSPPAEYARLRAEH  
PVVRLPMLGGDTAWVVSRRHADVRQVLSDFRMSADRRRPGFPGFAPTTTEGQ  
RQASFANFRPPLNWLDPPEHAICRRQIVDEFVSRRVRQSRALVERVVDTH  
LDALTAGAPGADLVSTFAYPVPSQVICEVLGVYPYGEHEFFERRSTLMFRR  
STPADERARCAREIRDFLDMVVTDKERRPGDDVLSRLLYRQRSAGGMDHE  
AVVSMAFVLLVAGHVTTSNMLALSVLALLTHPARLARLRAEPPERFPAAVE  
ELLRYFTVVEAATARTTTAEIMIGGVTTAAGEGVVALGQAANRDP RVFEH  
PDEFDPDRDARAHAFGHGRHICPGQHLARLEMEVALSRLFRRLPGLRLT  
MEVSDLPLKEDSNIFGLYALPVAW

>CYP162A8 (2517954054) *Salinispora pacifica* CNS863

MISPDLSDPFTFYQNGDPLPVWAE LRREHPVYDNRRADGTRI WAVMTHKLC  
TDMLTNPKVFSSANGMRLDSNPRVLARAAGKMLNVTDP PQHDKIRKLVSS  
AFTPTIRIRLEANMRATAGRAIDTAIADGGCELTRLAHKLPVSVICDLLG  
VPEQDWDFMAERTRFAWGSTAADDREEVEKVA AHT EIMAYFLDLAADRRK  
RPMEDLV SALVHGEVDGRALTD EDVLYNCDALLSGGNETTRHATVGGFLA  
FVMNPDEWSAIRQNRDLLPSAIQEIVRYTSPVMHSLRTATRDVEFGGINI  
RAGEYVVAWLPSANRDEQLFDDPDRFNIRRS PNRHLGFIQGNHYCIGAGL  
AAMELRVMFDELLNRVSEVRLAGPARRLR SNLLWGFDSL PVTFFHVGAGR

>CYP161T2P (2517954103) *Salinispora pacifica* CNS863

MARCWAGVPYANWEQFRRWSDDAADMYDQERSVGGYQALRDYIAELAQVR  
LRVSGTDLISDLMESHRTPEGFTLNQVVELGLTLLFAGHETT VTAIDNG  
AVLPATHPEQRARLAGDPSLLDAAVEEILRGSVPRMNFFARPD DTPAGA  
PPRWANTDLVIGDVTVRAGELVLLGLAHANADERFFAESARFDVGRVPNR  
HLTFGNPHFCAGAPLARLEL

>CYP211B19 (2517954499) *Salinispora pacifica* CNS863

MDASEAVALLMSPPGRRDPYPTYERLRAHGPPVATAAGFVV TGYTEADTV  
LRNPRFGVMDDEERDGVFPHWQDSPAMMSISQSMIRANPPDHSRMRRLAA  
GVFTPRRVAALREVVAQADELIDELIRAGRGGAPVDFLG SFAYPLPVTV  
ICALLGVPAADWAQFRRWASELTAVLEPEITPQELAVADAGATELRDYFT  
ELIAQRRRDPADDLT TALVQAHDADGDRLSGEELLANLVLLL VAGFETTT  
NLLGNGLFVLLTHPDSATALRGQPELAPSYVEELLRYDSPVQLTSRTVRE  
SVTLGGVELPAGSWLLVLLGAANRDPARFTD PARFDPGRAQSPPLSFGAG  
AHYCLGAGLARLEAQVAFPLLLRRLPELSLAGEPVRRSR LTLRGYETLPV  
TVGAVAADHGT PAGAARGTP

>CYP105AB29 (2517955342) *Salinispora pacifica* CNS863

MTETASITTPGTSSTTTSGPASGQVTD AEFFPVERGCPFSTPVEYEQIRDH  
SPLAKVRLTTGREAWWIAGHELGRAVLADRRFSSDRRRDNFPFVSTD PET  
RKQLQDQPTSMIGMDGAEHAQARRALMGFTVRRMAGLRPRIQQIVDQHI  
DEMLSSEQRSADLVEALS LVPVSLVICELLGV PYADHDFQAHSGPLIRH  
TTPSEVRLRIQEELNTYL GALIDRKVTDPTDDLLSRQIAKHHAAGTFNRT  
SLVSMAFLLLIAGHETTANMISLG VVGLLQHPDQLAMIKEDPEKTPPAVE  
ELLRYFTIADTVTARVATEDVQLGDTTINAGDGVVISGLAADHDPTVFTD  
PDRIDLERGARRHVAFGFGPHQCIGQTLARLELQIVFDTLFRRIPALRLA  
APLDDIPFKSDAFVYGA EKLPVAW

>CYP211C6 (2517955422) *Salinispora pacifica* CNS863

VPDIEGLLTRLYSAQGRQDPYPVYADLHAQAAIAALEPRPKRQRVAAVAV  
GYDLVAAVLRDPEWFKQPPPDWRDQEILRILQSSMMFINPPDHGRMRHVF  
AGTFTPRRLGALEPVINRVTDDELLDRMADAGPGEVDFVAEFAYPLPARVM  
AEFIGIPATELAWYRERVDRVDAFLDVAGKTPERLAAAANAAGAELRSFYR  
ELLAHRRRTPGEDLISGLVEAVDAGGVELTEDELISNLIVLFNASFVTTV  
YLLSNGLPVLLAHPEVAAALASSPELAAGAVDEILRLQTPVHLLARAAPR  
DMVLGGVSIPOGQSVLLLLIAAANRDPAHFPDPDRFDPRRSSPPSLAFGLG  
LHYCLGAAVSRLEGRALAPRLLSRFPRRLRILEQPVYSGSLFLRGIDKLSV  
SPGGREHP

>CYP125A66 (251795553) *Salinispora pacifica* CNS863

MTEPRIPVGFDFTDPAVLERRVPREEFAELRRTPVWWNAQPKGSAGFDD  
DGYWVVTRYADVMASRDSETYSTRENTAIARFQPGTTQADREMQRVIMI  
NVDPPPEHTKLRAIVSRGFTPRAINALRGSLGERAERIVRDAAGRGTGDFV  
TDVACELPLQAI AELIGVPQHRRKVFWDWSNQLIGYDDPAYGVDPLAASA  
ELLAYAMEMAHERQRNPSDDLVTQLVNAQIDGHELTADFGFFVMLLAVA  
GNETTRNAITHGMLAFLENPEQWELFKAERPRSAVEEIIRWATPVNVFQR  
TALVDTTLAQAI SAGQRVALFYGSANFDES VFEEPERFDITRSPNPHLG  
FGGSGVHFCLGANLARLEIELIFNSIADHMPDIRKVADPQRLRSGWINGI  
RELPRYH

>CYP245A11 (2517955778) *Salinispora pacifica* CNS863

MSSTTLPRFTLTGWNREDIVNPYPVYRRYREVAAVHRGEAGGDAPETFYV  
FSYDQVAQVLSSSCFGRGRSLDATAASVPVPADQKALRAVVENWLVMFMDP  
PRHTELRSLLNRSFSPRIVTGLRPRIARIAQELL SRLGRQVETDLVEGFA  
APLPILVIAELLGIPAGRHWLRTNALALQEASSSRAGRDTAGYARAEAA  
AQEFTEYFREQVHLRRGSTGDDLLTILANAQLRGVPVSLDAVVGTAVHLL  
TAGHETTTNSLAKAVLALQAHPAVLEELRGADGLTADSIEEFLRYDPPVQ  
AVTRWTHQD TTLGGWEVPRGSRVVALLG SANRDPARFPLPDALDVHRPAD  
RHLGFGGLGIHYCLGATLARAELEIGLQTLLNGLPTLGYPAQYVDYADDMV  
FHGPSRLILVNPGERFCQ

>CYP244A5 (2517955782) *Salinispora pacifica* CNS863

MSATTNAELGEAPETSMPIDPGLFDCMPDLIAAARIAPVVRIPYLGRHAW  
VVCDELVKQAL THPKMGKDIALVPEWMRQPGLMVTAQPPPEYARAMIMS  
DGENHARIRRIHAPVLSRPNTERWGEQVADKVEGFLDELSKAAAGSNAEV  
DVVTNYTHKIPLAFISEMLGLPPAAEHRLRSITDIMLYSSDYAARREAIG  
GLFGAVEEWVRNPDGLRDGVITGLLAGSDGPGA AVTEGEVIVWTLGMIIT  
GYETTGSLISTSLYEALRRPPHERPRTDEDITAWIEETLRVHPPFPHPPTW  
RFPLEDIELGGYLIPKGAPVQVSIAAANRQPGE GADSFDAERRGHGHL SF  
GLGMHYCIGAPLVRLEAKIAVRGFLRRFPQARLSADTAVQWESEWMIRRM  
SSLPAVLS

>CYP208A26 (2517956208) *Salinispora pacifica* CNS863

MTVIADRGGRVPPGPPVTAGLRLL LALGRDRLGMLTSAATEFGDVARLPV  
GPKRLYFFNHDPDHAKHVLADNHANYAKGIGLVHARRALGDGLLTSGGELW  
RKQRRVIQPAFLNRRLAQYAGVVGQEATRLAERLATRVDPGPVDVLD EMT  
RLTLGVLGRTL LLD AELTGFGVGESFAAVQDQAMFELETLSAVPTWIPLR  
RQRRFRARRRHLQEVVDVLA AERGQNV EGRDDVLSRLILSTRAEADAALG  
RQRLRDELVTLLLAGHETTASTLGWSLYLLDQHPQLRERVRHEATSVLGD  
RVPGYADLHQLQYTAMVVQEAIRLYPPVWILTRKARAEDEVGGYRV PAGA  
DLLICPYTLHRHPRFWEEPGRFDPERFDPARLTNRPRYAYIPFGAGPRFC

VGNNLGMLEATLVLAVLLRDLRLEGLPGRAVVPEPMLSLRVRGGLPMMVR  
RAD

>CYP1005A8 (2517956417) *Salinispora pacifica* CNS863

VSAVLFRSWTKTVGTHWPAVTRVADQQGTEHLVVTEHELVRQVLTQVTY  
RPDNALDAVTPIPVFALRVLAGHRFRLPPTLANNGGVSHPAIRALVADAL  
HPAKVAAQRPWLTKLVAERVAAIGATLDGGATDLHAELSADLPLLVLAR  
LVELPDAPVSAVKQFARAALALFWAPLDADRQLALADEVGRFHHQVLRFA  
DTGGGLAAALRATGHPPDVLVGALFFLLVAGQETTSQFLTLLHRLAGEP  
TVRAALRDGGVSVANVVEEGLRLEPPIVTWRRVAAVDSTLGGTAVPAGTN  
VLLWLLARAGRDP AIVPAPDEF RPGQRGSRRHLAFGAGAHRC LGDQLARME  
AAVVVEQAAPLLDGISVVRAPWYPDNLTFRMPDAFVIRR

>CYP107AX9 (2517956799) *Salinispora pacifica* CNS863

VTAQPAPVFDQRLRLDPHRRYNALRDQAPVHRVRTPDGAPAWLVTRYDDV  
RAAFIDPRLSVDKRFSGTDGEHGSSLPELDAHLLNRDPPDHTRLRLRLAA  
AAFTPRRVADLRPAVEKTVSTLLDGLAGNDHAELIGSLASPLPLQVMHEL  
LGLPTQTSVDFRTWTNTLLSADANQPAQSRSAMANMRRFLIEQVAHKRAQ  
PGDDLLTGLLCVREDDDGLTDELVAMLFLLMFAGYDNTAALIGNVIHAL  
LTDVELAEAVRTGSLAVDELVDGVLRWNPSFPLAVRRFAREPITIAQGTI  
PAGDRIWLCLASANRDP AHFTEPDEIGIADMRRPHLSFGHGIHYCLGAPL  
ARLQTTVAVAAILFDRFP GIRLAVFPVQDIQWRESFRLRGLVALPVSL

>CYP107AW6 (2517956812) *Salinispora pacifica* CNS863

VETVTGTSAPPPVPYIADPYPTLARIRANGPVSILHSDEGVPMWVIARYR  
EVRAALADPRFGQDARRAQALADNRVAGVTLGGDIVHMLNSDPPDHTRLR  
RHHVQGAFTARRVAAMRPLVERITTSLLDGLAGRKSVDLVQDLAFPLPMLV  
ICELLGFPAEERNAYRSWSTAILTHDDDPAVFATALREMTDYIAVQLRLR  
RSRPGDDLLTELLAARDAGQLTDDEIVGMVFLLLIGGHETTNNLLGTATL  
ALLRNPDQHRWLLANGHALPEAIDEFLRYESPVAMATLRFTTTPVTVDV  
VIPAGELVLVSLGGANRDPDRFPDADRLILD RRDTGHLAFGHGLHRC LGA  
FLGKLEGEVALGALLRRHPKLALATEVRQLQWRDTIMLRGLES LPVSLHG

>CYP163B20 (2517957498) *Salinispora pacifica* CNS863

VTATEAKYVGQVGSRNAASTIDLADPATFAGHDLTNFWQRLRDEEPIYWN  
PPTGGRRGFVLSRHADILEVYRDDMTFTSERGNVLVTLLAGGDAGAGRM  
LAVTDGPRHAELRKLLLRALGPRVLGPVCRAVRANTRQMIGEAAAANGECD  
FATDIASRIPMITISNLLGVPEADRASLLKMTKTALSADDESISD TDSEM  
ARNEILLYFQDFVEFRKNPGEDVVSMLVNSSIDGVPLSDDDIVLNCYSL  
IIGGDETSRLTMIDSINTLAANPGQWRRLKEGRCDIDKAVDEVLRWASPS  
MHFGRTAVRETVIHGERIQVDDIVTLWGASGNRDERAFKRPEVFDLDRAP  
NRHLSFGHGHPHYCIGSYLAKVEISELLIALRDLILGFEVIGAPQRIRSNL  
LSGFSTMPVRFDADRTGLASEAREG

>CYP105BL3 (2517957531) *Salinispora pacifica* CNS863

MSSHSAAAPGPETATPLHTLAPELTFPQFERATPFDPPEAYTELSGRCPV  
APVRMADGKPSWLITSFEGVRAALSDPRLSSDMSHPGFNRTGKPVDDLL  
KDTLGAMDGERHRYRRLTGELTVRRAKAMRPVITQITDEALDQLAAAG



PGADLVTHVALVVPSPRVACHLVGIPLSEYELFTGMAAKLMDSTSNADQIA  
ALQDMVSYFDTLVTDREHHRDDLLGHMVRRYLATGELDREMLIRLAWTT  
MAAGQETTAHMIIGLVAALLRHHPGQLELLRREPHLMPGAVDELMRYLPMI  
QFGIPRVAMDDVEVDGQTVTAGEGVVALPPLANRDPVFFERPELDVRRN  
ARQHLSFGYGPQHCPAHALARLELEVYGRLLERFPTLRLADSDADLKVQ  
DEDIMYSVSELAVAW

>CYP107AY7 (2517957797) *Salinispora pacifica* CNS863

MRAEPAPIPRSGARLGQEYDQLRKTDGVHQVLLPDTSLAWLVTSPELVSR  
ALADPRLALNRKHSRGGWSGFALPPALDANLLNLDAPDHTRLRRLVGPAPF  
SPQ RVAALRPRIERTAEELVDTVATGSPVDLVTGYCTPLSVQVIADLLG  
VPEAGRDTLRAWTDTMLTSYPPDRDAIRQAVVELHGYVNNLIEAKQQRPG  
DDL LSALVATEQEGDRLTRDELTSLAFLILFAGYENTANLIASTVLRLLD  
HGSLRGVRASEAIEETLRLEPPAPAAIRRFPIEETTIGGATIPAGDTVLL  
SIAAATRGTDGNSARLAFGNPHFCLGAALARVEAEEAITVLARRLP SLA  
LAVPGAPVRWRPTFRTHGPAELLVTW

>CYP208A21 (2517958080) *Salinispora pacifica* CNS863

MTTTSIDRRRPPGPPRAAALSMLLTMSRDR LGMMTAAARAYGDAAWLPVG  
HKALYFFNHPDYAKHVLTDNSDNYTKGIGLVHARRALGDGLLTSEGELWR  
EQRRVIRPSFRSGRAPDQASVIAEEVASLVERLRARAGGPPVNVVTEFTG  
LTLGVLGRTLDDVLTALATVGDAFAAVQDQAMFELVTL SAVPTWIPLTR  
QRRFRRARAELEIRIVDDLVARRGDVSGRDDVLSRLILSTGAEPDARVRRQ  
RLRDELVTLLLAGHETTASTLGWTLYLIDGHPPVRERL LAEAVEVLGDRL  
PAYRDL PDLRFTTMVVQEAMRLYPPVWLLPRRSRRADRVGPYRV PAGSDV  
VVSPYTMHRHPGFWEPEPDRFDPLRFDP RNAADRPYAYLPFGAGPRVCVG  
SNLGMMEAVIAVAMLCRELRLVRVPTHA AVPEPMLS LRIRGGLPMSVHLT  
D

>CYP154M16 (2517958092) *Salinispora pacifica* CNS863

MPDRCPVLDP SGRDIHAEADRLRAQAPAVKVELPGGVHAW SITSYDVVKR  
LLLDRNVTKNARNHWPKF INDEIPPDWEMISWVAMDNMVTAYGKHLVRLR  
RLIAKAFTAQRVETVRPQVEKLVDEL LDGLAAETGEVVDLREKFCYPLPA  
LLIAELIGMTEQQRAQTAKAMDLMVDTTVSPDQAQAILTGWRTAMDELIA  
AKRREP GKDIASDLIAARDDENGGLTDSELTD TIFAILGAGSETTINFL  
DNAVTALVTHPGQLELVRSGRAGWDDVIDEVL RVQCPLASLPLRYAVTDI  
ELDGVTIPQGDPI LINYAAAGRDPALHGDTAGEFDVFRENKEHVSFGHGP  
HYCLGAGIARLVATIGLSRLFERFPDLRLAVPAEELQPLPTFIMNGHRAL  
PVRLVPAPAAATAV

>CYP107CT3 (2517958262) *Salinispora pacifica* CNS863

MTGASGDRTGQCPIALDHDFYADPHPAYRVIKENG NKPTPIVLKTGMAYL  
PPGLEAWLVTAYEDVEFVLRDPRFRK SIDEAMPLFAAQSGGTAAARGSLL  
YNNMANNDPPVHTRLRKPLNAMFTSR SVAGRRDVVRSAALETLEKVAGSQ  
TFDLVKDFAFFFSISVISRTLGVPDADRGT FHGWVQTITGDAPPEILRRD  
AGLMVEYLRGLIRGRRESAGNGTDDVLTLLATSLAEDEAVAQAYALLAAG  
YETTANLIVTGFLT LAAHPEQLRRLWSDPGLVPDAVEEMLRHQSPFNLSL  
YRYVTEPVELNGVRI PRGAIVFLAFAAANRDECRFTEPDSFDITQPHRDH  
LAFGGGIHNCIGKHLARMEAQVAFETLIERCPGLAVHTPDEEFDWKASPT  
FRGLRTL RVGPGPAPGGWEREQ

>CYP163B1 (2518148037) *Salinispora tropica* CNB476

VTAA DTGRVSGESQTPAHTVDLADPATFANHDLTGFWQQLRDEEPIHWN  
PPTAGRRGFVVVSRYADILDVYRDDVTFTSERGNVLVTLLAGGDAGAGRM  
LAVTDGPRHAELRKLLLRALGPRVLAPVCAAVRTNTRQMIREAVTKGEC  
FASDIASRIPMMTISNLLGVPDADRAFLLSLTKTALSADDESISETESAM  
ARNEILLYFQDLMEFRRDHPGEDVVSMLVNSSIDGAPLSDDDIVLNCYSL  
IIGGDETSRLTMIDSVNTLAAHPQQWRRLKDGQCEIDKAVDEVLRWASPS  
MHFGRVAARDTILHGVRIRADDIVTLWHASGNRDERVFHRPEVFDLGRTP  
NRHLSFGHGPHYCIGSYLAKVEISELLIALRDLTSGFETTGEPPQIRIRSNL  
LTGFATMPVRFVFPDRAGLARDALDG

>CYP154M1 (2518148410) *Salinispora tropica* CNB476

MRRRCPVVIDPAGTDIHAEGARIRANGSVSQVELPGGVLAWSVTGQQVAR  
KVLSDQRFKSKDPRKHWTDYLEGRIGQDFPLIGWVMDNLTAYGSDHSRL  
RKPCANAFTPRRVEALRPAVERAAVELLGELATVSPTESVDLKARYAHPL  
PSRVICDLFGVPEEDREEMLRGGEVNVDTRVSAEEAAANVERWHQQLDF  
IEEKRRNPGPDLTSDLIAAQQAEGRSLTDSEMVGTLHIMLATGTEPVKNL  
IGNAVFALLTHPEQLDLVRSGRAGWDDVIQETLRMQAPVAHLPRFAVED  
VDIDGVTIRRGDPLLVNFAAIGRDPDVHGDTAAEFDITRADKEHLSFGHG  
VYRCIGQPLALREAEIALRMLFQRFPNLVLAVPPEEVTPQPTFIMNGLDT  
LPVLLKGRA

>CYP208A4 (2518148439) *Salinispora tropica* CNB476

VTVAAAGRTFSGPTGAALLRSLWQLGQDRLGLMTSAARYGDAVRLGVGSR  
SLYFFNHPDHAKHVLADNSGNYTKGLGLVHARRALGDGLLTSEGELWREQ  
RRVIQPVFQAKRVAGQAHAVAEADRLIARLRARRGRGPVNLTDEFTALT  
LGVLGRTLDDANLDAFTTVGAAFEEMQNQAMFEMASMSVPMWVPLPQQL  
RFRRARRELERIVGRLVADRTARGEETGADDALSRLIASTRDEPDGVAR  
RRMRDELVTLLLAGHETTASTLGWTFHLINQDPRVRVRLREEAIDVLGGR  
LPEYADLARLTYTKMVSEAMRLYPPVWMLSRLARDADVVDGYVPVPRAD  
VLICPYTLHRHPAFWFPEPERFDPERFDPEVTTDRPRYAYVPFGAGPRFCV  
GNHLGLMEAVFVAMVSREFDLVAPVGQPVVAEPMLSLRVRGGLSMTVEP  
VS

>CYP125A15 (2518148517) *Salinispora tropica* CNB476

MTEPRIPVGFDFTDPAVLERRVPREEFAELRRTAPVWWNVQPRGSAGFDD  
DGYWVVTRYADVMAVSRSDDTYSTRENTAIARFQPGTTRADLEMQRVIML  
NVDPPHEHTKLRAIVSRGFTPRAINALRGSLAERAERIVRDAAVRGTGDFV  
ADVACELPLQAI AELIGVPQHHRKVFWDWSNQLIGYDDPAYGVDPLTAAA  
ELLAYAMEMANERQLNPSDDLVTKLVNQIDGEHLTTDEF GFFVMLLAVA  
GNETTRNAITHGMLAFLEHPEQWELFKAERPRSAVEEII RWATPVNVFQR  
TALVDTTLGGQAI SAGQRVALFYGSANFDES VFEEPERFDITRSPNPHLG  
FGGSGAHFCLGANLARLEIELIFHSIADHMPDIRKVAEPRRLRSGWINGI  
REMPVRYR

>CYP211C1 (2518148650) *Salinispora tropica* CNB476

VLDVEGLLARLYSEQGRQDPYPVYADLHAQGAIAALAPRPEGQRVA AVAV  
GYDLVGAVLRDPEWSKQPPPGWMEQEILRTLQSSMMFINPPDHGRMRKVF  
AGTFTPRRLGTLEPVINRVADELDRMADAGPGEVDFVAEFAYPLPARVM  
AEFIGIPATELAWYRDRVDRIDAFLDVAGKTPERLAAAANAAAAELRVFYA  
DLLARRRRTPGEDLISGLVEAVDAGGVQLTEDELINNLI VLFNASFVTTV  
YMLSNGLPVLLHEPEVAAAALADDPETAGAIIDEILRLQTPVHLLARAAPR  
DTVLGGVPI PQGQNVLLLLIAAANRDP AHFPDPDRFDPRRP GPPSLAFGLG

LHYCLGAAVSRLEGRILALPRLLSRFPRLRIMEQPVYSGSLFLRGIDKLSV  
SPGGRMHP

>CYP107AW1 (2518148923) *Salinispora tropica* CNB476

MESVTSTSAPPPVPYIADPYPALARIRANGPVSIHLSDEGIPMWVIARYR  
NVRAALADPRFGQDARRAQTADNRVAGVTGGDVIHMLNSDPPDHTRLR  
HLVQGAFTARRVAAMRPLVERITTSLLDGVGGRQTVDLVQDFAFFPLPMLV  
ICELLGFPAEERDAYRSWSTAILTHNDDPAAFATALRDMTDYIEVQLRHR  
RARPGEDLLTELLAARDAGQLTDDEIVGMVFLLLIGGHETTNNLLGTATL  
ALVRNPDQHRWLLANPHALSEAIDEFLRYESPVAMATLRFTTAPVTVDV  
VIPSGELVLVSLGGANRDPDRFPDADRLILDRRDTGHLAFGHGLHRCLGA  
FLGKLEGEVALGALLGRYPGLTLAAEVRQLRWRDTIMLRGLESPLVSLHG

>CYP1005A1 (2518149077) *Salinispora tropica* CNB476

VSAVLFRSWTKTAGTHWPAITRVADQQGTEHLVVTQHALLVRQVLTQDQTY  
RPDNALDAVTPIPVAAALRVLAGHRFRLPPTLANNGGVSHPAIRALVADAL  
HPAKVAAQRPWLTGLVAERVAAIRRTLDSSGSTDLHAELNADLPLLVLAR  
LVELPDAPVSAVKQFARAALFELFWAPLDADRQLALADEVGRFHQVLRIFA  
DTGGGLAAALRATGHPPDVLVGLFFLLVAGQETTSQFLTLLHRLADEP  
TVRAALRADSVSVADVVEEGLRLEPPIVTVRRVAAVDSTLGGSTVAAGTS  
VLLWLARAGRDPVAVPAPDEFPRPGQRGSRRLAFGAGAHRCCLGDQLARME  
AAVVVEQVTPLLDGVTVVRPPWYPDNLTFRMPDAFVVRR

>CYP211B1 (2518149692) *Salinispora tropica* CNB476

MDASEAVALLMSPGRIDPYPTYERLRAHGPPVQTAAGFFVVTGYTEADT  
VLRNARLAFEVMDDELRDDVFPHWQDSPAMKSIARSMIRANPPNHGRMR  
LAAGFTPRRIAALREVVTQADELADEMIRAGRDGAPVDFMGSAFYPLP  
VAVICALLGVPAADWARFRGWASDLTAVLEPEITPQELTVADAGASELRD  
YFTELIAQRRRAPADDLTALVQTHDADGDRLSGEELLANLVLLLVAGFE  
TTTNLLGNGLVLLLAHPDSATALRDQPELAPGYVDELLRYDSPVQLTTRT  
VRESVLLAGVELPAGSWVLVLLGAANRDPERFTDPTRFDPGRAQSPPLSF  
GAGAHYCLGAGLARLEAQVAFPLLLRRLPELALAGEPTRRNRLTLRGYET  
LPVTVSAIAADHGTPAGVARGTP

>CYP1004B1 (2518151008) *Salinispora tropica* CNB476

MTTSALAPRFDALDPNVVEDPYPEYARLRAAGPLCRLGPGSWGVTREFADV  
TNLQHDPRLGSEFPAGYHEISVGDGPASAFFQRMVLYRDPDHIRLRRLM  
SGAFTPAVVRRLRSHIEDLVDELLAPALAAGRMDLVPELAYPLPVRVCR  
LMGIPPESTEDVRHHATNIGRAFTAVVPEQARTEADEAVSWLREHLGALL  
EQRRSHRGDDLLSRLDAAESGDNLDAEIVDNTVFSFFAGFETTVHMIT  
TGTAALLAHPDQLARLRADPSLVTTAVDEFLRWDAPIQGTARYVREPIEI  
GGRTIRRGRLVLMIGSANHDERRFAQPDRLDVGRQDNPHVAFGGGAHL  
LGAFLARMEGAVVFDRLARLAVLEPDGPTVREPNTFFRAYASVPVRIGDR

>CYP1004A1 (2518151012) *Salinispora tropica* CNB476

MRANTARPHLSAAFLATKDDPYPAYAELRARGPLTRAELGQWLVTGHGAV  
SALLRDGRLESMPAEYTRLTLGDSPGVDLHRLVLTPTPEHTRLRRFI  
GRALGTPVVRRLHDRIAAATDALLEPALDRGLDVVTELAVALPVGVVCD  
LIGIPTGDRPAVLTRVTALAKVFDAANLSPADLADINTALPWLHDYFGDL

LAVRRAGSGGPTLTEMYWEESASDRLAVADFVDNMLFLFHAGFETTMGLV  
SNGVAALLNNPEQLGRLRADPALVPSAVEEFLRYDAPIQNVIRVARKPVE  
VAGQKIRAGRTVLLLLGAANRDEEVFADAERLDVGRDPNPHLGFGGGLHH  
CVGTALARLMAVVVFERLVDRTVLGPAAPAVRRRHASLSYDHLPLAVA  
AR

>CYP125G1 (2518151051) *Salinispora tropica* CNB476

MSTEVVSTGNRADIAPATYAAGVPYAEFARLRRDKPVSWVPEAALWRRS  
GEGRILSQGPGFWAVTTHEGVVAASRQPEVFSSGRQGAFLADPRTTADLE  
QARQLLVNMDAPQHARVRKLVTAFTTPRAIRALGDSVTAHARNLVERAVR  
QEECDVVADLAAELPLLVLADLLGLPREDRHLLYQWSNNLVGFDDPEYGG  
GDVEAYRKTFEAFQYALSVAGERRRAPREDLMTLLATSEVDGRRRLTDRE  
FCNFWLLLTVVAGNETTRHLITGSLVLAALVDNPMQRERLVADDTLLPSAVDE  
LLRWVSPIMQFRRTAIVDTELCGTPIAAGDKVVLWYTSANRDAAVFEAPD  
ELRLHRNPNPHLSFGMGPHFCLGAHLARLEARTMLRELAPHLRSRFRLTGP  
VVRLESNFVNGVKSPLGSFTGQ

>CYP107AY1 (2518151210) *Salinispora tropica* CNB476

MRAELAPIPRSGARLGQEYDQLRNAGDVHQVLLPDSSSLAWLVTNPKLVSR  
ALTDPRALNRRHSRGSWSGFALPPALDANLLNLDAPDHTRLRRLVGPAPF  
SPQRVSAALRPRIIRRTAEHLLDTLVATSGPVDLVTGYCTPLSVQVIADLMG  
VPEAGRADLRTWTDMLTSYPPDRDAIRQAVVELHGYVVDLIDTKRQQPG  
DDLSSALVTIEQDGDRLRDELTSALFLILFAGYENTANLIASVLRLLD  
HGGLRGVQLPEAIEETLRLEPPAPAAVRRFPTEEMTIGGATIPAGDIVLL  
SIAAATRGTAAGNAARLAFNGPHFCLGAALARVEAEEALTVLARRLPDLA  
LALPVAQVRWRPTFRTHTGPAELLVTW

>CYP105AB2 (2518151353) *Salinispora tropica* CNB476

MTETASIAATTRTASGQLTDAEFFVQRCGPFTAPTEYEQIREESSIAKVRL  
KNGGEAWWIAGHELGRSVLADRRFSSDRRRDNFFVSTDPETRAQLQSQP  
TSMGLMDGAHAQTRRALMGFTVRRMAGLRPRIQQIVDQHIDEMLATPQ  
RSVDLVEALSPLVPVSLVICELLGVADHDFQGLTGPLLRLHTTPPEVRL  
RIQEELNTYLGTLIDRKLTDPTDDLLSRQIAKHRDNGTFDRASMVSLAFL  
LLVAGHETTANMISLGVVGLLQHPDQLVLIKDDDPDKTPLAVEELLRYFTI  
ADSVTARVATEDVQLGDTTINAGDGVVISGLAADRDPTVFAPDRDLDER  
GARHHVAFGFGPHQCIGQTLARMELRIVFDTLFHRIPTRLRLAAPLDDIPF  
KSDAFVYGIEELPVAW

>CYP107AX1 (2518151593) *Salinispora tropica* CNB476

MTSRPTAVFDQCLLRDPHSRYNALRDQAPVHHVLTDPDGAPAWLVTRYNDV  
RAAFTDPRLSVDKRFSGTDGEHGSSLPPELDAHLLNRDPPDHTRLRRLAA  
AACTPRRVADLHPAVERIVSTLLDGLAGHDRAELIGSLASPLPLQVMHEL  
LGLPTQANIDFRTWTNTLLSADANQPAQSRAAMANMRRFLIEQLAHKRAQ  
PGDDLTLGLLAAREDDRLTDDELVAMVFLLMFAGYDNTAALIGTVTHAL  
LTNAELHEAVRGGSALDELIDEVLRWNPAFPLAVRRFAREPITIAGQTI  
PAGDRIWLCLASANRDPAQFTQPDDELGIIGLRRSHLSFGHGIHYCLGAPL  
ARLQTTIAVTSLLNRFPPEMRLAVPAHDIRWRESFRLRGLIALPVYL

>CYP107E3 (2518152654) *Salinispora tropica* CNB476

VTIDQEIRKYPFCESPGIGIDPTYGLLRSTEPLARVQLPYGEVSWLATRY  
EDVKTVLTDPRFSRAAAQGKDQPRTREEMTYEGIIIGLDPPDHTRLRKLKLAG

KALTARRVNAIRADAQRIANEYVDEMIAGSPGDLVELFALPYPVTVICE  
LLGVPFEDRAQFRIWTEGLTSTSEQLMVYAEQLFGYMGKLVAQRRREPTD  
DLLGALVKARDEGDRLTEQELLSIAGVGLLLTGVEVTVSTHIPNFVYALLT  
HPELMAQLRADRSIVPAAVEELLRMIPLNPAAMFFRYAVEDVTLSGITVR  
AGEPVLVSLPGANRDPEVFENPETFDFTREQNPHVAFGHGPHHCLGAQLA  
RMELQVALHTVLDRFPDLSLADGDEGVSWKSGLLVRGPSRLLVAW

>CYP163B1 (2524768492) *Salinispora tropica* CNT261

VTAADTGRVSGESQTPAHTVDLADPATFANHDLTGFWQQLRDEEPIHWN  
PPTAGRRGFVVVSRYADILDVYRDDVTFTSERGNVLVTLLAGGDAGAGRM  
LAVTDGPRHAELRKLLLRALGPRVLAPVCAAVRTNTRQMIREAVTKGEC  
FASDIASRIPMMTISNLLGVPDADRAFLLSLTKTALSADDESISETESAM  
ARNEILLYFQDLMEFRDHPGEDVVSMLVNSSIDGAPLSDDDIVLNCYSL  
IIGGDETSRLTMIDSVNTLAAHPQQWRRLKDGQCEIDKAVDEVLRWASPS  
MHFGRVAARDTILHGVRIRADDIVTLWHASGNRDERVFRPEVFDLGRTP  
NRHLSFGHGPHYCIGSYLAKVEISELLIALRDLTSGFETT\_GEPQIRSNL  
LTGFATMPVRFVPPDRAGLARDALDG

>CYP107NH1 (2524768763) *Salinispora tropica* CNT261

MTEPVVSLMDPEFWNDPVSAYERLRGSGPLIRMGLPGVPPVWLVTSCHEV  
KSALSDPRFVVDAANVPGHHGPGIVDKMMAASGMPDEFRDYMTNMMFTDG  
KDHSRLRLRLVTPGFSARRIRAMRPRVNQIAEELVESLAEKGSSELIADFS  
APLTTTVICELIGVDRADQAQMGAWMHDTTGERVVSGRAMVNYTRDLIE  
RRRAEPADDMISAMIRSGDEAGDRLSDAEIIAMALLLINAGHHSTAQFIP  
NAVLVLLDHPEQLARLRAEPGQLPGAMDELMRLANPVPIATPRYATEDME  
FAGVAVRRGEALTGSLEAANFDPERFPAPRQLDTGRDLGRGDGHLISFGAG  
PHYCPGAALARLEGEIALDHLRLRRDNLRLAVERDEVYVDVSLGLRMLS  
SLPVRL

>CYP247A8 (2524768769) *Salinispora tropica* CNT261

VRLNPEAGRPVALGSIDLFDPDLLASGDPHSVWDVMRSEAPLHRQVLPDG  
RVFWSVTRYEDVCRVLGDHRAFTSERGTVFVTQLGADDIAAGKLLTSTDPP  
RHTEVRRRAIGRLTARAVAHWEDLVRRVVRFLPALDGGCWDLAERAQH  
LPLIIAGSLLGIPDSWEKLVQLTGMVTAPSDPMFGLDSEAATLAIHHE  
IFDYLSDLVRRRRSVGTGGDSLDDHMLTVRAGAGPLPDEEVVYDSYSLIL  
GANATTPTHTLSGIVTLAERPEQCDKVRADASLIPSMVEEGLRWTSACN  
FMRYATVDTRLTGGTVPAGEAVVAWIASANRDESQFADPHTFDVTRGENR  
HVAFGFGPHYCIGAPLARMTARIFFEELFRLFWSIEIDGEPQHLSNFIA  
GMTHLPVVTRKRAQV

>CYP107Z27 (2524768779) *Salinispora tropica* CNT261

MSCTHPCHSLMDPTLIDDPAGGFSRIRDESPLAHAMVPGVDGPVWLVRH  
ESVRKVLGDRRFVNDPTNVPGSSTPDLWAHAALAQGVPEHYLEHVRSMLO  
LDGEVHARLRLVSRRAFTMRITALRPRMMQLTEELLDLLPAKAEDGVVD  
LVEHFNYVQPISVICALVGVPAADRAAWIRWSRALTMESGTIGDAVTGM  
VDNIRALIEQRRAEAADDLLTDLVRVRDADGDRLSEREMITMVITLVTAG  
HDSTGLLLSNGLAALLTHPDQLAKLRADPSLGPQAFDELMRWCSAIVAAR  
PRYATEDVELEDGLVRRGDVVIPLVLSANYDPEVFEDPHRLDISRVHEQR  
RFHHVGFGDGLHYCLGAALAKHEAAIAITALLERYPGLELAVPAQRLRRA  
RLPLTWRLDSLPLVRLGIGG

>CYP154M1 (2524769135) *Salinispora tropica* CNT261

MRRRCPVVIDPAGTDIHAEGARIRANGSVSQVELPGGVLAWSVTGQQVAR  
KVLSDQRFSDKPRKHWTDYLEGRIGQDFPLIGWVLMNLTAYGSDHSRL  
RKPCANAFTPRRVEALRPAVERAAVELLGELATVSPTESVDLKARYAHL  
PSRVICDLFGVPEEDREEMLRGGEVNVDTRVSAEEEEANVERWHQQMLDF  
IEEKRRNPGPDLTSDLIAAQQAEGRSLTDSEMVGTLHIMLATGTPEPVKNL  
IGNAVFALLTHPEQLDLVRSGRAGWDDVIQETLRMQAPVAHLPPRFATED  
VDIDGVTIRRGDPLLNVFAAIGRDPDVHGDAAEFDITRADKEHLSFGHG  
VYRCIGQPLALREAEIALRMLFQRFPNLVLAVPPEEVTPQPTFIMNGLDT  
LPVLLKGRA

>CYP208A4 (2524769163) *Salinispora tropica* CNT261

VTVAAAGRTFSGPTGAALLRSLWQLGQDRLGLMTSAARYGDAVRLGVGSR  
SLYFFNHPDHAKHVLADNSGNYTKGLGLVHARRALGDGLLTSEGELWREQ  
RRVIQPVFQAKRVAGQAHAAVEEADRLIARLRARRGRGPVNLTDEFTALT  
LGVLRGRTLLDANLDAFTTVGAAFEEMQNQAMFEMASMSMVMWVPLPQQ  
RFRRARRELERIVGRVLADRTARGETGADDALSRLIASTRDEPDGVAR  
RRMRDELVTLLLAGHETTASTLGWTFHLINQDPRVRVRLREEAIDVLGGR  
LPEYADLARLTYTKMVVSEAMRLYPPVWMLSRLARDADVVDGYVPV  
VLICPYTLHRHPAFWPEPERFDPERFDPEVTTDRPRYAYVFPFGAGPRFCV  
GNHLGLMEAVFVAMVSREFDLVAPVGPVVAEPMLSLRVRGGLSMTVEP  
VS

>CYP125A15 (2524769242) *Salinispora tropica* CNT261

MTEPRI PVGFDFTDPAVLERRVPREEFAELRRTAPVWWNVQPRGSAGFDD  
DGYWVVTRYADVMAVSRSDTYSTRENTAIARFQPGTTRADLEMQRVIML  
NVDPPHTKLRAIVSRGFTPRAINALRGSLAERAERIVRDAAVRGTGDFV  
ADVACELPLQAI AELIGVPQHHRKVFDWSNQLIGYDDPAYGVDPLTAAA  
ELLAYAMEMANERQLNPSDDLVTKL VNAQIDGEHLTDEFGFFVMLLAVA  
GNETTRNAITHGMLAFLEHPEQWELFKAERPRSAVEEII RWATPVNVFQR  
TALVDTTLGGQAI SAGQ RVALFYGSANFDES VFEEPERFDITRSPNPHLG  
FGGSGAHFCLGANLARLEIELIFHSIADHMPDIRKVAEPRRLRSGWINGI  
REMPVRYR

>CYP211C1 (2524769375) *Salinispora tropica* CNT261

VLDVEGLLTRLYSEQGRQDPYPVYADLHAQGAIAALAPRPEGQRVA AVAV  
GYDLVGAVLRDPEWSKQPPPGWMEQEILRTLQSSMMFINPPDHGRMRKVF  
AGTFTPRRLGTLEPVINRVADELDRMADAGPGEVDFVAEFAYPLPARVM  
AEFIGIPATELAWYRDRVDRIDAFLDVAGKTPERLAAANAAAAELRVFYA  
DLLARRRRTPGEDLISGLVEAVDAGGVQLTEDELINNLI VLFNASFVTTV  
YMLSNGLPVLLHHEPEVAAAALADDP ELTAGAIDEILRLQTPVHLLARAAPR  
DTVLGGVPI PQGQNVLLLLIAAANRDP AHFPDPDRFDPRRPGPPSLAFGLG  
LHYCLGAAVSRLEGRALPRLLSRFPRLRIMEQPVYSGSLFLRGIDKLSV  
SPGGRMHP

>CYP1005A1 (2524769548) *Salinispora tropica* CNT261

VSAVLFRSWTKTAGTHWPAITRVADQQGTEHLVVTQH ALVRQVLT DQLTY  
RPDNALDAVTPI PVAALRVLAGHRFRLPPTLANNGGVSHPAIRALVADAL  
HPAKVAAQR PWTGLVAERVAAIRRTLDSGGSTDLHAELNADLPLLVLAR  
LVELPDAPVSAVKQFTRAAL ELFWAPLDADRQLALADEVGRFHQVLRIFA  
DTGGGLAAALRATGHPPDVLVGALFFLLVAGQETTSQFLTLLHRLADEP  
TVRAALRADSVSVADVVEEGLRLEPPIVTVRRVAAVDSTLGGSTVAAGTS  
VLLWLARAGRDP AVVPAPDEF RPPGQRGSRRLAFAGAHRC LGDQLARME  
AAVVVEQVTPLLDGVTVVRPPWYPDNLTFRMPDAFVVRR

>CYP107AW1 (2524769683) *Salinispora tropica* CNT261

MESVTSTSAPPPVPYIADPYPALARIRANGPVSIHLSDEGIPMWVIARYR  
NVRAALADPRFGQDARRAQTADNRVAGVTLGGDVIHMLNSDPPDHTRLR  
HLVQGAFTARRVAAMRPLVERITTSLLDGVGGRQTVDLVQDFAFPLPLMLV  
ICELLGFPAEERDAYRSWSTAILTHNDDPAAFATALRDMTDYIEVQLRHR  
RARPGEDLLTELLAARDAGQLTDDIVGMVFLLLIGGHETTVNLLGTATL  
ALVRNPDQHRWLLANPHALSEAIDEFLRYESPVAMATLRFTTAPVTVDDV  
VIPAGELVLVSLGGANRDPDRFPDADRLILDRRDTGHLAFGHGLHRCLGA  
FLGKLEGEVALGALLGRYPGLTLAAEVQRQLRWRDTIMLRGLESPLVSLHG

>CYP211B1 (2524769984) *Salinispora tropica* CNT261

MDASEAVALLMSPGRIDPYPTYERLRAHGPVVQTAAGFFVVTGYTEADT  
VLRNARLAFEVMDDELRDDVFPHWQDSPAMKSIARSMIRANPPNHGRMR  
LAAGFTPRRIAALREVVTQAQADELADEMIRAGRDGAPVDFMGSFAYPLP  
VAVICALLGVPAADWARFRGWASDLTAVLEPEITPQELTVADAGASELRD  
YFTELIAQRRRAPADDLTALVQTHDADGDRLSGEELLANLVLLLVAGFE  
TTTNLLGNGLVVLAAHPDSATALRDQPELAPGYVDELLRYDSPVQLTTRT  
VRESVLLAGVELPAGSWVLVLLGAANRDPERFTDPTRFDPGRAQSPPLSF  
GAGAHYCLGAGLARLEAQVAFPLLLRRLPELALAGEPTRRNRLTLRGYET  
LPVTVSAIAADHGTAPGVARGTP

>CYP107AX1 (2524771324) *Salinispora tropica* CNT261

MTSRPTAVFDQCLLRDPHSRYNALRDQAPVHHVLTDPGAPAWLVTRYNDV  
RAAFTDPRLSVDKRFSGTDGEHGSSLPPELDAHLLNRDPPDHTRLRRLAA  
AACTPRRVADLHPAVERIVSTLLDGLAGHDRAELIGSLASPLPLQVMHEL  
LGLPTQANIDFRTWTNTLLSADANQPAQSRAAMANMRRFLIEQLAHKRAQ  
PGDDLLTGLLAAREDDRLTDDDELVAMVFLLMFAGYDNTAALIGTVTHAL  
LTNAELHEAVRGGSLALDELIDEVLRWNPAFPLAVRRFAREPITIAGQTI  
PAGDRIWLCLASANRDPAQFTQPDELGIIGLRRPHLSFGHGIHYCLGAPL  
ARLQTTIAVTSLNRFPEMRLAVSAHDIRWRESFRLRGLIALPVYL

>CYP107AY1 (2524772252) *Salinispora tropica* CNT261

MRAELAPIPRSGARLGQEYDQLRNAGDVHQVLLPDSSSLAWLVTNPKLVSR  
ALTDPRALNRRHSRGSWSGFALPPALDANLLNLDAPDHTRLRRLVGPAP  
SPQRVSALRPRIIRRTAEHLLDTLVATSGPVDLVTGYCTPLSVQVIADLMG  
VPEAGRADLRTWTDMLTSYPPDRDAIRQAVVELHGYYVDLIDTKRQQPG  
DDLLSALVTIEQDGDRLTRDELTSLAFLILFAGYENTANLIASTVLRLLD  
HGGLRGVQLPEAIEETLRLEPPAPAAVRRFPTEEMTIGGATIPAGDIVLL  
SIAAATRGTAGNAARLAFGNGPHFCLGAALARVEAEEALTVLARRLPDLA  
LALPVAQVRWRPTFRTHGPAELLVTW

>CYP105AB2 (2524772471) *Salinispora tropica* CNT261

MTETASIATTRTASGQLTDAEFFVQRCFPFTAPTEYEQIREESSIAKVRL  
KNGGEAWWIAGHELGRSVLADRRFSSDRRRDNFPFVSTDPETRAQLQSQP  
TSMGLMGDAEHAQTRRALMGFTVRRMAGLRPRIQQIVDQHIDEMLATPQ  
RSVDLVEALSPLVPSLVICELLGVFPYADHDFQGLTGPLLRRHTTPPEVRL  
RIQEELNTYLGTLIDHKLTDPTDDLRSRQIAKHRDNGTFDRASMVSLAFL

LLVAGHETTANMISLGVVGLLQHPDQLVVIKDDPDKTPLAVEELLRYFTI  
ADSVTARVATEDVQLGDTTINAGDGVVISGLAADRDPTVFAEPDRDLER  
GARHHVAFGFGPHQCIGQTLARMELRIVFDTLFRHRIPTLRLAAPLDDIPF  
KSDAFVYGIEELPVAW

>CYP107AY1 (2524772252) *Salinispora tropica* CNT261

MRAELAPIPRSGARLGQEYDQLRNAGDVHQVLLPDSSSLAWLVTNPKLVSR  
ALTDPRRLALNRRHSRGSWSGFALPPALDANLLNLDAPDHTRLRRLVGPAPF  
SPQRVSALRPRIIRRTAEHLDDTLVATSGPVDLVTGYCTPLSVQVIADLMG  
VPEAGRADLRTWDTMLTSYPPDRDAIRQAVVELHGYVVDLIDTKRQQPG  
DDLLSALVTIEQDGDRLTRDELTSLAFLILFAGYENTANLIASVLRLLD  
HGGLRGVQLPEAIEETLRLEPPAPAAVRRFPTEEMTIGGATIPAGDIVLL  
SIAAATRGTAGNAARLAFGNPHFCLGAALARVEAEEALTVLARRLPDLA  
LALPVAQVRWRPTFRTHGPAELLVTW

>CYP105AB2 (2524772471) *Salinispora tropica* CNT261

MTETASIATTRTASGQLTDAEFPVQRCFPFTAPTEYEQIREESSIAKVRL  
KNGGEAWWIAGHELGRSVLADRRFSSDRRRDNFPFVSTDPETRAQLQSQP  
TSM LGMDGAEHAQTRRALMGFTVRRMAGLRPRIQQIVDQHIDEMLATPQ  
RSVDLVEALSPLVPSLVICELLGVPYADHDFQGLTGPLL RHTTPPEVRL  
RIQEELNTYLGT LIDHKLTDPTDDL SRQIAKHRDNGTFDRASMVSLAFL  
LLVAGHETTANMISLGVVGLLQHPDQLVVIKDDPDKTPLAVEELLRYFTI  
ADSVTARVATEDVQLGDTTINAGDGVVISGLAADRDPTVFAEPDRDLER  
GARHHVAFGFGPHQCIGQTLARMELRIVFDTLFRHRIPTLRLAAPLDDIPF  
KSDAFVYGIEELPVAW

>CYP1004B1 (2524772582) *Salinispora tropica* CNT261

MTTSALAPRFDALDPNVVEDPYPEYARLRAAGPLCRLGPGSWGVT RFADV  
TNLQHDPRLGSEFPAGYHEISVGDGPASAFFQRMVLYRDPPDHIRLRRLM  
SGAFTPAVVRRLRSHIEDLVDELLAPALAAGRMDLVPELAYPLPVRVVC R  
LMGIPPESTEDVRHHATNIGRAFTAVVPEQARTEADEAVSWLREHLGALL  
EQRRSHRGDDL SRLLDAEESGDNL SADEIVDNTVFSFFAGFETTVHMIT  
TGTAALLAHPDQLARLRADPSLVTTAVDEF LRWDAPIQGTARYVREPIEI  
GGRTIRRGRVLVLMIGSANHDERRFAQPDRLDVGRQDNPHVAFGGGAHLC  
LGAFLARMEGAVVFDRLARLAVLEPDGPTVREPNTPF RAYASVPVRIGDR

>CYP1004A1 (2524772586) *Salinispora tropica* CNT261

MRANTARPHLSAAFLATKDDPYPAYAELRARGPLTRAELGQWLVTGHGAV  
SALLRDGRLESMPAEYTRLTLGDSPGVDFLHRIVLTRTPPEHTRLRRFI  
GRALGTPVVRRLHDRIAAATDALLEPALDRGRLDVVT ELAVPLPVGVVCD  
LIGIPTGDRPAVLTRVTALAKVFDAANLSPADLADINTALPWLHDYFGDL  
LAVRRAGSGGPTLT EMYWEESASDRLAVADFVDNMLFLFHAGFETTMGLV  
SNGVAALLNNPEQLGRRLADPALVPSAVEEFLRYDAPIQNVIRVARKPVE  
VAGQKIRAGRTVLLLLGAANRDEEVFADAERLDVGRDPNPHLGFGGGLHH  
CVGTALARLMAVVVFERLVDRVTVLGPAAPAVRRRHASLRSYDHLPLAVA  
AR

>CYP125G1 (2524772625) *Salinispora tropica* CNT261

MSTEVVSTGNRADIAPATYAAGVPYAEFARLRRDKPVSWSVPEAALWRRS



GEGRILSQGPFWAVTTHEGVVAASRQPEVFSSGRQGAFLADPRTTADLE  
QARQLLVNMDAPQHARVRKLVTAFTTPRAIRALGDSVTAHARNLVERAVR  
QEECDVVADLAAELPLLVLADLLGLPREDRHLLYQWSNNLVGFDDPEYGG  
GDVEAYRKTFEAFQYALSVAGERRRAPREDLMTLLATSEVDGRRLTDRE  
FCNFWLLLVVAGNETTRHLITGSLVALVDNPMQRERLVADDTLLASAVDE  
LLRWVSPIMQFRRTAIVDTELCGTPIAAGDKVVLWYTSANRDAAVFEAPD  
ELRLHRNPNPHLSFGMGPHFCLGAHLARLEARTMLRELAPHLSRFRLTGP  
VIRLESNFVNGVKSLLPGSFTGQ

>CYP107E3 (2524773359) *Salinispora tropica* CNT261

VTIDQEIRKYPFCESPGIGIDPTYGLLRSTEPLARVQLPYGEVSWLATRY  
EDVKTVLTDPRFSRAAAQKDKQPRTREEMTYEGIIIGLDPPDHTRLRKLKAG  
KALTARRVNAIRADAQRIANEYVDGMIAGKSPGDLVELFALPYPVTVICE  
LLGVPFEDRAQFRIWTEGLTSTSEQLMVYAEQLFGYMGKLVAQRREEPTD  
DLLGALVKARDEGDRLTEQELLSIAGVGLLLTGNETVSTHINPFIYALLT  
HPELMAQLRADRSVPAAVEELLRMIPLNPAAMFPRYAVEDVTLSGITVR  
AGEPVLVSLPGANRDPEVFENPETFDFTREQNPHVAFGHGPHHCLGAQLA  
RMELQVALHTVLDRFPDLSLADGDEGVSWKSGLLVRGPSRLLLA

>CYP107AY1 (2519083200) *Salinispora tropica* CNR699

MRAELAPIPRSGARLGQEYDQLRNAGDVHQVLLPDSSLAWLVNPKLVSR  
ALTDPRALNRRHSRGSWSGFALPPALDANLLNLDAPDHTRLRLRVGPAPF  
SPQRVSALRPRIIRTAEHLLDTLVATSGPVDLVTGYCTPLSVQVIADLMG  
VPEAGRADLRTWTDTMLTSYPPDRDAIRQAVVELHGYVVDLIDTKRQQPG  
DDLSSALVTIEQDGDRLTRDELTSALFLILFAGYENTANLIASVLRLLD  
HGGLRGVQLPEAIEETLRLEPPAPAAVRRFPTEEMTIGGATIPAGDIVLL  
SIAAATRGTAGNAARLAFNGPHFCLGAALARVEAEEALTVLARRLPDLA  
LALPVAQVRWRPTFRTHGPAELLVTW

>CYP163B1 (2519083318) *Salinispora tropica* CNR699

VTAADTGRVSGESQTPAHTVDLADPATFANHDLTGFWQQLRDEEPIHWN  
PPTAGRRGFVVVSRYADILDVYRDDVTFTSERGNVLVTLLAGGDAGAGRM  
LAVTDGPRHAELRKLLLRALGPRVLAPVCAAVRTNTRQMIREAVTKGEC  
FASDIASRIPMMTISNLLGVPDADRAFLLSLTKTALSADDESISETESAM  
ARNEILLYFQDLMEFRDHPGEDVVSMLVNSSIDGAPLSDDDIVLNCYSL  
IIGGDETSRLTMIDSVNTLAAHPQQWRRLKDGQCEIDKAVDEVLRWASPS  
MHFGRVAARDTILHGVRIRADDIVTLWHASGNRDERVFHRPEVFDLGRTP  
NRHLSFGHGPHYICISYLAKVEISELLIALRDLTSGFETTGEFQIRSNL  
LTGFATMPVRFPVDRAGLARDALDG

>CYP154M1 (2519083700) *Salinispora tropica* CNR699

MRRRCPVVIDPAGTDIHAEGARIRANGSVSQVELPGGVLAWSVTGQQVAR  
KVLSDQRFKSKDPRKHWTDYLEGRIQDFPLIGWVMDNLTAYGSDHSRL  
RKPCANAFTPRRVEALRPAVERAAVELLGELATVSPTESVDLKARYAHPL  
PSRVICDLFGVPEEDREEMLRGGEVNVDTRVSAEEAAAANVERWHQQMLDF  
IEEKRRNPGPDLTSDLIAAQQAEGRSLTDSEMVGTLHIMLATGTEPVKNL  
IGNAVFALLTHPEQLDLVRSGRAGWDDVIQETLRMQAPVAHLPPFRFAVED  
VDIDGVTIRRGDPLLVNFAAIGRDPDVHGDAAEFDIITRADKEHLSFGHG  
VYRCIGQPLALREAIALRMLFQRFPNLVLAVPPEEVTQPPTFIMNGLDT  
LPVLLKGRA

>CYP208A4 (2519083728) *Salinispora tropica* CNR699

VTVAAAGRTFSGPTGAALLRSLWQLGQDRLGLMTSAARYGDAVRLGVGSR  
SLYFFNHPDHAKHVLAADNSGNYTKGLGLVHARRALGDGLLTSEGELWREQ  
RRVIQPVFQAKRVAGQAHAVAEADRLIARLRARRGRGFPVNLDEFTALT  
LGVLGRITLLDANLDAFTTVGAAFEEMQNQAMFEMASMSMVMWVPLPQQ  
RFRRARRELERIVGRVLADRTARGEETGADDALSRLIASTRDEPDGVAR  
RRMRDELVTLLLAGHETTASTLGWTFHLINQDPRVRVRLREEAIDVLGGR  
LPEYADLARLTYTKMVVSEAMRLYPPVWMLSRLARDADVVDGYVPV  
PARADVLICPYTLHRHPAFWPEPERFDPERFDPEVTTDRPRYAYVPFGAGPRFCV  
GNHLGLMEAVFVAMVSREFDLVAPVGQPVVAEPMLSLRVRGGLSMTVEP  
VS

>CYP125A15 (2519083807) *Salinispora tropica* CNR699

MTEPRIPVGFDFDPAVLERRVPREEFAELRRTAPVWVWVQPRGSAGFDD  
DGYWVTRYADVMASRSDSTYSTRENTAIARFQPGTTRADLEMQRVIML  
NVDPPHTKLRAIVSRGFTPRAINALRGSLAERAERIVRDAAVRGTGDFV  
ADVACELPLQAIAGELIGVPQHRRKVFWDWSNQLIGYDDPAYGVDPLTAAA  
ELLYAMEMANERQLNPSDDLVTCLVNAQIDGHELTDEFGFFVMLLAVA  
GNETTRNAITHGMLAFLEHPEQWELFKAERPRSAVEEIIRWATPVNVFQR  
TALVDTTLGGQAIASAGQRVALFYGSANFDESVEEPPERFDITRSPNPHLG  
FGGSGAHFCLGANLARLEIELIFHSIADHMPDIRKVAEPRRLRSGWINGI  
REMPVRYR

>CYP211C1 (2519083940) *Salinispora tropica* CNR699

VLDVEGLLTRLYSEQGRQDPYPVYAGLHAQGAIAALAPRPEGQORVAAVAV  
GYDLVGAVLRDPEWSKQPPPGWMEQEILRTLQSSMMFINPPDHGRMRKVF  
AGTFTPRRLGTLEPVINRVADELDRMADAGPGEVDFVAEFAYPLPARVM  
AEFIGIPATELAWYRDRVDRIDAFLDVAGKTPERLAAAANAAAAELRVFYA  
DLLARRRRTPGEDLISGLVEAVDAGGVQLTEDELINNLIVLFNASFVTTV  
YMLSNGLPVLLEHPEVAAALADDPELTAGAIDEILRLQTPVHLLARAAPR  
DTVLGGVPIPGQONVLLIIAAANRDPAHFPDPDRFDPRRPGPPSLAFGLG  
LHYCLGAAVSRLEGRALPRLLSRFPRLRIMEQPVYSGSLFLRGIDKLSV  
SPGGRMHP

>CYP107AW1 (2519084212) *Salinispora tropica* CNR699

MESVTSTSAPPPVPYIADPYPALARIRANGPVSIHLSDEGIPMWVIARYR  
NVRAALADPRFGQDARRAQTLADNRVAGVTLGGDVIHMLNSDPPDHTRLR  
HLVQGAFTARRVAAMRPLVERITTSLLDGVGGRQTVDLVQDFAFPLPLV  
ICELLGFPAEERDAYRSWSTAILTHNDPAAAFATALRDMTDYIEVQLRHR  
RARPGEDLLTELLAARDAGQLTDDEIVGMVFLLLIIGGHETTNNLLGTATL  
ALVRNPDQHRWLLANPHALSEAIDEFLRYESPVAMATLRFTTAPVTVDV  
VIPAGELVLVSLGGANRDPDRFPDADRLILDRRDTGHLAFGHGLHRCLGA  
FLGKLEGEVALGALLGRYPGLTLAAEVRQLRWRDTIMLRGLESPLVSLHG

>CYP211B1 (2519084565) *Salinispora tropica* CNR699

MDASEAVALLMSPLGRIDPYPTYERLRAHGPPVQTAAGFFVVTGYTEADT  
VLRNARLAFEVMDDELRDDVFPHWQDSPAMKSIARSMIRANPPNHGRMR  
LAAGFTPRRIAALREVVTQAQADELADEMIRAGRDGAPVDFMGSFAYPLP  
VAVICALLGVPAADWARFRGWASDLTAVLEPEITPQELTVADAGASELRD  
YFTELIAQRRRAPADDLTALVQTHDADGDRLSGEELLANLVLLLVAGFE  
TTTNLLGNGLVLLAHPDSATALRDQPELAPGYVDELLRYDSPVQLTTRT  
VRESVLLAGVELPAGSWVLVLLGAANRDPERFTDPTRFDPGRAQSPPLSF  
GAGAHYCLGAGLARLEAQVAFPLLLRRLPELALAGEPTRNRRLTLRGYET  
LPVTVSAIAADHGTAGVARGTP

>CYP1005A1 (2519084913) *Salinispora tropica* CNR699

VSAVLFRSWTKTAGTHWPAITRVADQQGTEHLVVTOHALVRQVLTQDQTY  
RPDNALDAVTPIPVAAALRVLAGHRFRLPPTLANNGGVSHPAIRALVADAL  
HPAKVAAQRPWLTGLVAERVAAIRRTLDSGGSTDLHAELNADLPLLVLAR  
LVELPDAPVSAVKQFARAALFLWAPLDADRQLALADEVGRFHQVLRFA  
DTGGGLAAALRATGHPPDVLVGALFFLLVAGQETTSQFLTLLHRLADEP  
TVRAALRADSVSVADVVEEGLRLEPPIVTWRRVAAVDSTLGGSTVAAGTS  
VLLWLARAGRDPVVPAPDEFPRPGQGRSRRHLAFGAGAHRCCLGDQLARME  
AAVVVEQVTPLLDGVTVVRPPWYPDNLTFRMPDAFVVRR

>CYP107AX1 (2519086713) *Salinispora tropica* CNR699

MTSRPTAVFDQCLLRDPHSRYNALRDQAPVHHVLTDPGAPAWLVTRYNDV  
RAAFTDPRLSVDKRFSGTDGEHGSSLPPELDAHLLNRDPPDHTRLRLRLAA  
AACTPRRVADLHPAVERIVSTLLDGLAGHDRAELIGSLASPLPLQVMHEL  
LGLPTQANIDFRTWTNTLLSADANQPAQSRAMMANMRRFLIEQLAHKRAQ  
PGDDLLTGLLAAREDDRLTDDELVAMVFLLMFAGYDNTAALIGTVTHAL  
LTNAELHEAVRGGSLALDELIDEVLRWNPAPFLAVRRFAREPITIAGQTI  
PAGDRIWLCLASANRDPAQFTQPDDELGIIGLRRPHLSFGHGIHYCLGAPL  
ARLQTTIAVTSLNRFPEMRLAVPAHDIRWRESFRLRGLIALPVYL

>CYP113E1 (2519086849) *Salinispora tropica* CNR699

MMATVPRLTFADGGVSVLPWFRQMRDDQPVWYDQGTGSWNVFRYADIAQI  
LTDPATFSSDPGRMTMPPELVEEAEGSLVAVDPPRHGRLRALISTAFTPRL  
VEQLAPRVRSIAERLLDRTFVDRGPEGEFDAIGDVAYLLPVYVIGELLGL  
PETDREYLVRTADEFYAISADDPFDGTYMASMQSTLDSLGTMYMLDQAERR  
RARPGDDLMSALAHAEIDGEQLNDREIRNFAVLLLTAGHITTTALLGNTL  
LALGERRDVMLRWRHGQVDTADVLEEVLRRHTPFTEVYRFTTTEVTIGNQ  
VVPGDQLLRLWIASGNRDERQFADPDFTFVLGRDSRHLGFGGLGIHYCLGAS  
LARMESVVLVLAERTTTTAPAVQGLSYDAPGIFCLRSLPVSYRRS

>CYP105AB2 (2519086951) *Salinispora tropica* CNR699

MTETASIAATTRTASGQLTDAEFPVQRCFPFTAPTEYEQIREESSIAKVRL  
KNGGEAWWIAGHELGRSVLADRRFSSDRRRDNFPFVSTDPETRAQLQSQP  
TSMLGMDGAEHAQTRRALMGFTVRRMAGLRPRIQQIVDQHIDEMLATPQ  
RSVDLVEALSPLVPVSLVICELLGVPPYADHDFQGLTGPLLRTTPPEVRL  
RIQEELNTYLGTLIDHKLTDPTDDLRSRQIAKHRDNGTFDRASMVSLAFL  
LLVAGHETTANMISLGVVGLLQHPDQLVLIKDDPKTPLAVEELLRYFTI  
ADSVTARVATEDVQLGDTTINAGDVVISGLAADRDPTVFAEPDRDLER  
GARHHVAFGFGPHQCIGQTLARMELRIVFDTLFHRIPTLRLAAPLDDIPF  
KSDAFVYGIEELPVAW

>CYP1004B1 (2519087277) *Salinispora tropica* CNR699

MTTSALAPRFDALDPNVVEDPYPEYARLRAAGPLCRLGPGSWGVTFRADV  
TNLQHDPRLGSEFPAGYHEISVGDPASAFFQRVMLYRDPPDHIRLRLRM  
SGAFTPAVVRRLRSHIEDLVDELLAPALAAGRMDLVPELAYPLPVRVVC  
LMGIPPESTEDVRHHATNIGRAFTAVVPEQARTEADEAVSWLREHLGALL  
EQRRSHRGDDLRLDAAESGDNLSDAEIVDNTVFSFFAGFETTVHMIT  
TGTAALLAHPDQLARLRADPSLVTTAVDEFRLWDAPIQGTARYVREPIEI  
GGRTIRRGRVLVLMIGSANHDERRFAQPDRLDVGRQDNPHVAFGGGAHLC  
LGAFLARMEGAVVFDRLARLAVLEPDGPTVREPNTPFRAVASVPVRIGDR

>CYP1004A1 (2519087281) *Salinispora tropica* CNR699

MRANTARPHLSAAFLATKDDPYPAYAELRARGPLTRAELGQWLVTGHGAV  
SALLRDGRLESMPAEYTRLTLGDSFGVDFLHRIVLTRTPPEHTRLRRFI  
GRALGTPVVRRLHDRIAAATDALLEPALDRGRLDVVTELAVPLPVGVVCD  
LIGIPTGDRPAVLTRVTALAKVFDAANLSPADLADINTALPWLHDYFGDL  
LAVRRAGSGGPTLTEMYWEESASDRLAVADFVDNMLFLFHAGFETTMGLV  
SNGVAALLNNPEQLGRLRADPALVPSAVEEFLRYDAPIQNVIRVARKPVE  
VAGQKIRAGRTVLLLLGAANRDEEVFADAERLDVGRDPNPHLGFGGGLHH  
CVGTALARLMAVVVFERLVDRVTVLGPAAPAVRRRHASLRSYDHLPLAVA  
AR

>CYP125G1 (2519087320) *Salinispora tropica* CNR699

MSTEVVSTGNRADIOHPATYAAGVPYAEFARLRRDKPVSWVPEAALWRRS  
GEGRILSQGPFGWAVTTHEGVVAASRQPEVFSGRQGAFLADPRTTADLE  
QARQLLVNMDAPQHARVRKLVTAFTTPRAIRALGDSVTAHARNLVERAVR  
QEECDVVADLAAELPLLVLADLLGLPREDRHLLYQWSNNLVGFDDPEYGG  
GDVEAYRKTFFEAFQYALSVAGERRRAPREDLMTLLATSEVDGRRLTDRE  
FCNFWLLLVLVAGNETTRHLITGSLVALVDNPMQRERLVADDTLPSAVDE  
LLRWVSPIMQFRRTAIVDTELCGTPIGAGDKVVLWYTSANRDAAVFEAPD  
ELRLHRNPNPHLSFGMGPHFCLGAHLARLEARTMLRELAPHLSRFRLTGP  
VIRLESNFVNGVKSLLPGSFTGQ

>CYP107AY17 (2519087537) *Salinispora tropica* CNR699

MTGNPTPIPRSGAQLGQQYDHLRKTGDVHEVLLPDASLAWLVTNPEVAAR  
ALADPRLALNRRHSRGGWSGFALPPSLDANLLNLDAPDHTRLRRLVGPAF  
SPQ RVAALRPGIRRAAEHLDDTLVATSGPTDLVTGYCNPLSVQVIADLMG  
IPEAGRTNLRAWTDTMLTSYPPDRDAIRQAVVELHGYYVDLIDVKQQQPG  
DDL LSALVTIEQDGDRLTRDELTSLAFLILFAGYENTANLIASALWLLN  
HGGLNEVP ISEAIEEALRHEPPAPVAIRRFPTEDIIIGDVTIPAGDTVLL  
SIAAATRGLDGNAARLAFGNGPHYCLGAALARAEAEALAVLARRLPGLT  
LAVPVAQVRWRPTFRTHGPAELLVSR

>CYP107E3 (2519087694) *Salinispora tropica* CNR699

VTIDQEIRKYPFCESPGIGIDPTYGLLRSTEPLARVQLPYGEVSWLATRY  
EDVKTVLTDPRFSRAAAQKQDQPRTREEMTYEGIIIGLDPDHTRLRKLKAG  
KALTARRVNIAIRADAQRIANEYVDEMIAKGSPGDLVELFALPYPVTVICE  
LLGVFPFEDRAQFRIWTEGLTSTSEQLMVYAEQLFGYMGKLVQRRREEPTD  
DLLGALVKARDEGDRLTEQELLSIAGVGLLLTG VETVSTHIPNFVYALLT  
HPELMAQLRADRS LVPAAVEELLRMIPLNPAAMFP RYAVEDVTLSGITVR  
AGEPVLVSLPGANRDPEVFENPETFDFTREQNPHVAFGHGPHHCLGAQLA  
RMELQVALHTVLD RFPDL SLADGDEGVSWKSGLLVRGPSRLLVAV

>CYP107AY2 (2515971470) *Salinispora arenicola* CNQ748

MTAEPTPIPRSGARLGQEYDQLRKTGDVHQVLLPDASLAWLVTNPEVAAR  
ALADPRLALNRRNSRGGWSGFALPPALDANLLNLDAPDHTRLRRLVGPAF  
SPQ RVAALRPGIRRAAEHLDDTLVATSGPTDLVTGYCNPLSVQVIADLMG  
VPEAGRTNLRAWTDTMLTSYPPDRDAIRRAVTE LHGYVVDLIDIKQQQPG  
DDL STLVTIEQDGDRLSRDELTSLAFLILFAGYENTANLIASAVLWLLD

HGGLNVVPISEAIEATLRHEPPAPVAIRRFPTEDIIIGGV TIPAGDTVLL  
SVAAATRGADGNAARLAFNGPHYCLGAALARVEAEEALTVLARRLPGLT  
LAVPPSQVRWRPTFRTHGPAELLVGW

>CYP105CT1 (2515971499) *Salinispora arenicola* CNQ748

MNSPNHMPADRSLTAPTSGCPMALSRGRVGLDVADEISELRDGGRLGRIT  
TAFGQEATLITRYDEVRAQMADSVVFNVAGVPSPPALVDGGFDTESVRRR  
RTVGNLIMLDPPEHTRLRRMVAAWFTTRRVERLRPRVVEIIDAALDEMER  
SGPPVDLVAMFAKTVPIVICELIGVPEELRERYRRRAERAVSASAVSTP  
LDELRLRLREAGWVSRELIEYHRENPSDDIIGMLLREHGTDSDHDDGITDDE  
LVGLANALLIAGHETTTQMLSMGTLALLRHPDQLALLRDDPSIVAGAVEE  
LLRYVGV LHGGFVRVATRDTRLGGHRIHAGELVVPALTAANRDPRLTDTG  
DRLDITRPPTSHVAFGHGVHFCIGAPLARMELREAFPALLRRFPGLRLAV  
PDSELEFTQGT TVYSLRGLPVTW

>CYP154M5 (2515971516) *Salinispora arenicola* CNQ748

VEQSCP YKLDVTGRDVHAEGEAI RARGPVAQVELPGGVQGSVTGYQAAR  
QVLADPRFAKDPKKWPAYTSGAIPP NWPLIGWLLMDNM TNDGADHQRLR  
KLVSHGFTPRQVERTRPLIVKIVNDLLDGLSSAGPDEVVDLKGRFATPLP  
ARVICDMFGVPEALRASVLRGAQVNV TSSISGEEAEANVEQWHRELLLV  
EAKREKPD EDDMASLLIAAKEEDGSTLTQEEVVGTLHLMLGAGSETLMNAL  
SYAVLGMLSNPGQYEMVRNGTSSWDDVIEETLRAQAPVAQLPLRYATEDV  
AVGGAVIKAGDPVLMGFTAIGRDP AVHGETAGDYDITREDKTHLSFGHGV  
HFCLGAPLARLELKIALPALFERF PNM TLAVRPDQLEPQGT FIMNGHREL  
PVR LGQPATVLA

>CYP105CP2 (2515972023) *Salinispora arenicola* CNQ748

MTKSMPVQDLPAFFIPRECPYRPSAQHVSLRSGGPMKVRLYNGRTAWLV  
TDSA HARAVLSDYRRVSIKPYHGNYPLLNEEF EKVVDSGYADVLFGVDPP  
EHTRQRQMIMPSFTLRRTAVLRPDIQRIVDDKLD EMMRHGAPGDLVTEFA  
QPVP SMVMSFLLGVPWEDHEEFETPAHKLFVPELAE EATTEL GAYLERLI  
QKKEQPGGTPGGTG LDDLI RDHLRAGALS RDELVHIAMAMLVAGTDTT  
NVISLGT LALLDNPDQWAALRDN PDELIPGAVEEILRYTSLIEAFARVAV  
SDIELNGAVIKEGEGILISSAGVNFDPALAPDPGRFDIRRP RPSPFSFSH  
GIHRCPGDNLARLELEIAFRSLVTRMPNLRTAKPIDQIPSNNDGTLQRL  
YELPVVW

>CYP105CN1 (2515972025) *Salinispora arenicola* CNQ748

MAAPAPQATQSTTPHPPSYPLPRECPYRPSAGTARLRDAGPVSTVRLYDG  
RTAWLV TGAAEARALLADSRVSNRADFPNYPVM DERHLSMRATREMAREE  
EGGFAAALFGMDPPEHTRQRQLLLPRFTVRQVAARRPAIQRIVDEHLDAM  
EANGSPADLVSAFATPVPTMVVCTHLGVPYQDRTRFEP AVAGLFEPDRAD  
AAMAE LTAYLHQ LIETKQSEPGDGVIDHLIANHLRPGAIDRAELVAIASA  
ILVAGTVTTSSAIALGTLALLTAPGQYAALVDNPD LVPGAVNEILRYLSL  
VEQLARVATEDIEIGGKLIRAGDGIIVSFAAGNLDPNVTTHPDRLDVALP  
PTNH LAFSHGIHHCIGQNLALLELDIAFRALVSRFPTLRLAVPAEQ LPTY  
FAGDV PRLACLPVTW

>CYP107FS2 (2515972026) *Salinispora arenicola* CNQ748

MPVPQGEQNLTTTEVFADPKALFATLGSRQPLHRISLPDGM PAVLVTGNRE  
ARQALSDPRLVRSITAAAPELHKYHPLASDDYALSRHMLFADPPDHGRMR

KLVSTAFTRRRVEQMRPRIQQITDDLIDVIAAKGEADLVETLALPLPIAV  
ISEMLGVPPFADRSEFERHAEVLTGINASSGFDALIAAGRWFDEYLAELVQ  
QRRREPQDDLISGMLAAQDKGDRLTDVELRSNALLLSAGFETTIVNLVAN  
GLLALLRHPEAMAAALRSEPNLMTTAVDELRLRYDSPVSCVTYHFAQEPVEI  
GGFKIRSGEHVVIAAAAAANHDPVTFADPSRLDLRREGSGQILSFSGIHF  
CLGAPLARLEGEIAFGTVLRLRAGLRLAVPADSLVWKASFVLHRLRLRPV  
TFTPDRAFPNIDSVHTV

>CYP248A2 (2515972094) *Salinispora arenicola* CNQ748

VLADAVTAFDPTAVDVRRDPYPSYHWLLRHDPVHRGAHQVWYVSRFADVR  
AVLGDERFARTGIRRFWTDLVGPGLLSQIVGDIILFQDEPDHGRLRGVVG  
PAFSPSALRRLEPTIEATVNDLLRPARALGAMDVVADLAYPLALRAVLEL  
LGLPAGDANAVGRWSRAVGRTLDRGATAEDMRRGHAAIAEFADYVERMLA  
ERREDGADLLALMLAAHRSQLMRNEIVSTVVTFFITGHETVASQLGNGL  
LSLLDHPEQLELMRRQPHLVPPQAVEECLRFDPVQSNTRQLAADVELHGR  
RLRRDDVVVVLAGAANRDPGRYDRPDELDIRRDPVPSMSFGAGMRYCLGS  
YLARLQLRTALGAMVALPDLRLACSPNELAYQPRTMFRGLTRLPAFTPA  
G

>CYP105W2 (2515972102) *Salinispora arenicola* CNQ748

MTGYQDRPTGDQPGAPVPSGSTDPGIGAFPLPRRCPFSPPAEYARLRAEH  
PVVRLPMLGGDTAWVVSRRHADVRQVLSDFRMSADRRRPFGFPKFAPTTEGQ  
RQASFANFRPPLNWLDPPEHAICRRQIVDEFVSRRVRQSRALVERVVDTH  
LDALTAAPGADLVSTFAYPVPSQVICEVLGVYPYGEHEFFERRSTLMFRR  
STPADERARCAREIRDFLDMVVTDKERRPGDDVLSRLLYRQRSAGGMDHE  
AVVSMAFVLLVAGHVTTSNMLALSVLALLTHPARLARLRAEPPERFPAAVE  
ELLRYFTVVEAATARTTTAEVTIGGVTTAAGEGVVALGQAANRDPRVFEH  
PDEFDPDRDARAHLAFGHGRHICPGQHLARLEMEVALSRLFRRLPGLKLT  
MEVSDLPLKEDSNIFGLYALPVAW

>CYP211B2 (2515972469) *Salinispora arenicola* CNQ748

MDVSEAIAVLISPGRLDPYPTYEQRLAHGPVSRTTAGLFVVTGYAEADM  
VLRDPRFVVLDDDLRDDVFPHWQDSPAIXIARSMLRTNPPDHSRIRRLA  
AGAFTPRRVAAMREVVTAQADELVDEMIRAGRDGARVDFMDMFAYPLPVA  
VICALLGVPAADRSRFRRWAGDLTGILEPEITPEELAGADAGADELRDYF  
TGLIEQRRRAPADDLTALVQAHDADGDRLSGEELLANLVLLVAGFETT  
TNLLGNGLVLLTRPEAAAALRDEPDLAPGYVDELLRYDSPVQLTTRTVR  
ESVSFAGTELPADSWLLVLLGAANRDPRRFPDPARFDPGRAQSQPLSFGA  
GPHYCLGAGLARLEAQVAFPLLLRRLPELALAGRPSRRTRLTLRGYETLP  
ITVGAVTADRGTPAGVAPGTP

>CYP211C1 (2515972713) *Salinispora arenicola* CNQ748

VVDVEELLTRLYSAQGRQDPFFVYADLHTQGPIAALPPEPERRRVAHAV  
GYDLVGAVLRDPEWSKAPPPGWTEQEILRTLQTSMMFINPPDHGRMRHV  
AGTFTPRRLGALEPVVNRVADELDRMADAGAGGLDFVAEFAYPLPARVM  
AEFIGIPETELDWYRERVVIDAFLDVAGKTPQRLAAANAAGAELEAFY  
ELLARRRRTPGEDLISGLVEAVDAGGVELTEDELVSNLIVLFNASFVTTV  
YMLSNGLPVLLAHPEVAAAALATDPVLTAGAVDEILRLQAPVHLLARAAPR  
DTVLGGVPIPPQGNVLLLVAAAANRDPAHFPDPDRFDPWRSGPPSLAFGLG  
LHYCLGAAVSRLEGRALPRLLSRFPRLRIMEQPVYSGSLFLRGIDKLSV  
SPGEGSTRE

>CYP125A41 (2515972860) *Salinispora arenicola* CNQ748

MTEPRIPAGFDFTDPEVLAHVRVPREEFAELRRTAPVWWNAQPRGSAGFDD  
DGYWVVTRYADVMTVSRSDTYSTRENTAIARLRPDTTREDIEMQRVIML  
NVDPPHEHTKLRAIVSRGFTPRAINALRGSLAERAHIVRDAAVRGVGVDFV  
TDVACELPLQAI AELIGVPQHRRKVFWDWSNQLIGYDDPAYGTDPLTASA  
ELLAYAMEMAERQSRSPSDDLVTCLVNAQIDGHELTDEFGFFVMLLAVA  
GNETTRNAITHGMVAFLDNPEQWELFKAERP KSAVEEII RWATPVNVFQR  
TALVDTVLGGQAI SAGQ RVALFYGSANFDEAVFEDPERFDITRSPNPHLG  
FGGSGAHFCLGANLARLEIELIFNSIADHL PDIRKVAAPQRLRSGWINGI  
RQMPVRYR

>CYP245A7 (2515973180) *Salinispora arenicola* CNQ748

MPSATLPRFALTGWSRENIVNPYPVYQRYREVASVHRGEPGGDAPDTFYV  
FSYDEVVQVLSSNCFGRGRSLDAAKASVPVPAEQKALRAIVENWLVFMDP  
PRHTELRLSLNRSFSPRIVTEL RPRIARIAQELLSRLGQQVDVDLVESFA  
APLPILVISELLGIPEERRAWLRANALALQEASSSRAGRVDVGYARAEVA  
AQEFTEYFREQVRLRRGRAGGDLITILANAQERGAPVSLDAIVGTCVHLL  
TAGHETTTNSLAKAVLALREHPAVLDELRGAEGLTTDAVEEFLRYDPVQ  
AVTRWAHQD TT LGGCDIPRGSRVVALLGSANRDQARFSPDVLDVRRPAD  
RHLSFGLGIHYCLGATLARAEEIIGLQALLDGVP T LGYGTQHVDYADDLV  
FHGPSRLVLVNLGERCK

>CYP244A4 (2515973184) *Salinispora arenicola* CNQ748

MSTTTNTELTEAPETNMPVDPGLFDCMPDLIAAARVAPVVRIPYLGRHAW  
VVCDELVKQAL THPKMGKDIALVPEWMRQPGLMVTAQPDPEYARAMIMS  
DGENHARIRRIHAPVLSRPNTERWGERVADKVEGF LDEL SQAGSGGSAEV  
NVVTNYTHKIPLAFISEMLGLPPEAEHRLRGITDIMLYSSDYAARREAIG  
GLFGAVEDWVRNPADLRDGVITGLLAASDGPDAAVTEGEVIVWTLGMIIT  
GYETTGSLISTSLYEAIRPPHERPKTDEDITAWIEETLRVHPPFPHTW  
RFPLEDIELGGYLIPKGAPVQVSIAAANRKPGE GADSFDAERRGHGHL SF  
GLGMHYCIGAPLVRLEAQIAVRGFLRRFPQARLSAETAVQWESEWMIRRM  
SVLPAVLS

>CYP1005A1 (2515973557) *Salinispora arenicola* CNQ748

VSAVLFRSWTKTAGTRWPDVTRVADQSGTEHLVVTRHALVRQVLTDQATY  
RPDNAL EAVTPVPVAALRVLAGHRFRLPPTLANNGGASHPAIRALVADAL  
HPTKVAAQRPWLTGLVADRVASIRTTLD SGGPVDLYADLTADLPLLVLAR  
LVELPDAPVNAVQKFARAAL EFWAPLDADRQLALADEVGRFHQVLR EFA  
DTGGGLAAALRATGHSPDVLVGALFFLLVAGQETTSQFLTLLHRLSGEP  
TIRAALRAGSSSVADVVEEGLRLEPPIVTWRRVA AVDSTLGGTTVAAGTS  
VLLWLARAGRDP AVVAAPDEF R PGQRGSRRLAFGAGAHRC LGDQLARME  
AAVVVEQATPLLDGVT VVRPPWYPDNLTFRMPDAFVVRR

>CYP208A12 (2515973993) *Salinispora arenicola* CNQ748

MTLDTITPRVPLGPRTAALRMLLVMKRDRLGMLTSAAARYGDASRLPVG  
HKALWFFNHPRYAKHVLADNSANYHKGIGLVHARRALGDGLLTSEGDLWR  
KQRKVIQPAFQSRRIAQQAGMIAEEAFALVERLRARAGAGPVELTAE L TG  
LTLGVLGRSLLDADLAGFDSIGDSFATVQDQAMFELET LNAVPMWIPLPR  
QIRFRARRRKLQAVVDTLVDGRAGNLADRVDVLSRLILSARGEADPRVGR  
ERLRDELVTLLLAGHETTASTLGWTL SLIDRHPGVWERLHAEAVEVLGDR  
LPEYDDLRLRLRYTVMVVEEAMRLFPPVWLLPRRALAPDTIGEYRVPANAD  
VVISPYTLHRHPEFWPNPERFDPERFAPGQAADRPRYAYLPFGAGPRFCV

GNNLGMMEAVFVIALLCRHLRLTGVPGYRLVPEPMLSLRIRGGGLPLVVRP  
VS

>CYP107Q4 (2515974371) *Salinispora arenicola* CNQ748

MTTTAETS AETIDLFSPEVVADPFGWYARLREETGPTTGTNLNIGTMMGGP  
EMWLVTTRYEDVRQVLTDPRFLTNPFPADSPLEDIRAGVFKRLDFPPDLIPW  
MANLLNVSDGEDHTRLRKLVSALT AHRIGKLRPRVEKITADLLDKLAED  
GKDGSPVDLVEEYCYPLPVTVICELV GIDEPDRPHWRAWGDSMATMNGER  
IPTTLVKCIELARELIAKRR AEPQDDLV TALVQAQ AEDQNRVSDDEIIGI  
LFSLVTAGHQTTTYLIGNSVILLLENPDQLARLKENPSMWPQAVRELQRL  
GPIQFAQPRFPSEDIELGGVTIPRGAPVAPL LLAANTDPRRFPDPNKLI I  
DRLAVGSEGLHGF GKG IHRCLGQHLAYQEA E VALQGLFTRFPDLSLAVPR  
EEIPWILRPGFTRTRTLPLKLV

>CYP105G5 (2515974372) *Salinispora arenicola* CNQ748

LT IETTETTPADDSLAPLPRQFMQRDDPSKLPPALAAAEQSPVGRSTL  
PDGDPFWMVSGYDEARAVLSDPRFSSDRFRYHPRFKKLSGQLGERLRNDK  
ARAGSFINMDPPEHTRYRKL LTGQFTVRRMRQLTVRIEQIVTEQVDVMLA  
EGNSADLVSAFAVPVPSLMICELLGVRYEDRTEFQRR AAGLLQTDLP IKQ  
AVENLEAQRAFMQRLVTDKR RTPADDMISGLVHHAGAEPPLTDDELVGIA  
TLLL FAGLDTTASMLGLGMFMLLQRPEQMAVLRDDPSRIGDAVEELLRYL  
TVVSTGLFRFAKEDVVLGDEH IPAGSTVVVSLMAANRDGRHWPEPETLDV  
TRVRSSHLAFGHGVHQCLGQQ LARIELTVGITELLRRLPNVRLAVPPADV  
PLRNDMITYGVHRLPILWDTP

>CYP1051A1 (2515974396) *Salinispora arenicola* CNQ748

MATDAAITRARTVPAWKALPAAVRDTHRA FVDVGNWSDGDVVRVSLGVSR  
PYLVTNPAHVQEVLHERAAIYPRGDDTALWRSVRKLVGDGILAEGDAWAA  
SRRVLAPMFRPARINAMVD TMADA IAGAVDDLHGAATAGTPIDVGRELSR  
IVCSAIMRVFFADRITVRDALRIMKAQETIVTAMAPRILAPLVPWWI PMP  
GDRRFRAAVRSIDDI LLPVLRQAQRQPDDGDDL SRLVRARADDGRALSE  
KMRDDLVSMVAVTTETSTVVL TWLWPLL ANHPDVANRLYDEIDRVVGGG  
PVRGDHLAELTYTRMVLDELLRLYPAGWILPRRAATTDVLGGVRINKGAT  
VILSPYVTQRMTAWWGPTAEAFDPERFAAGREAADGRHRYAYYPFGVGMH  
RCLGEHLFNLEAILIVATLLSRFRFALTDTSMPGVKVAASTRPARTVEMI  
LKPVAPVPAR

>CYP105CH1 (2515974494) *Salinispora arenicola* CNQ748

VSSLPLPTYPKLRDPADPLLPAP EYLAIQSEKPIAKVLLPSGRPTWLITG  
HALARQVLTEPCVSVD RRRHPNFYPVPNPDAVVAQVARWTYILLGDDPPL  
HTERRRL LISEFTVRQAQAMRPRIQQLVDFHLEQLIAAGPGADFSKHFAM  
QVPSAVICEMLGVPFADHDYFQERTALQLRRDVPVAAQKQAIDELLAYFE  
QLIQEKSSHPGDDVLSRLIVSNRETEAFDHEALVALG LLLL VGGHETTAN  
TLTLATATMLERPEIAEQLR TDPSLMPSAVEEFLRYFSVAVAVSRIATAD  
LQVGGQLVRAGESMLLV LNTIARDGT VFP EPHRLDIRRNARNHLAFSHGI  
HQCMGQNLARVEMQIALD TVLRRLPGLHLVTPFEELPFKYRHLVWGIEEL  
RVAW

>CYP105BL2 (2515974569) *Salinispora arenicola* CNQ748

MSSHSAAPDPETATPLHTLAPELTFPQFERSTPFDPPQAYTELSGRCPV  
APVSMADGKPSWLITSFEGVRTTLSDPRFSSDM SHPGFPNRTGKPVDDLL



KDTLGAMDGERHRYRRMLTGELTVRRAKAMRPVITQITDEALDQLAAAG  
PGADLVKHFVAVVPSRVACHLVGIPLSDYELFTGMAATLMDSTSSDDQFA  
ALQNMVSYFDTLVTDREHHDRDDLLGHMVRRYLATGELTRDMLIRLAWTT  
MAAGQETTAHMI GLGVAALLRHPDQLELLRREPHLLPGAVDELMRYLPLI  
QFGIPRVAMDDVEVDGQTVTAGEGVVALPPLANRDPVFERPDELDVRRN  
ARQHLTFGYGPHQCPAHALARLELEVYGRLLERFPTLRLADSDADLKVQ  
DKDIMYRVSELAVTW

>CYP105AB8 (2515975039) *Salinispora arenicola* CNQ748

MTETASSRLTDTEFPVQRECPFAEPVEYEQIRERSSIAMVRLTGGGEAWW  
ISGHEQGRAVLADRRFSSDRKANFPFVSTDPVVRKRLHAQPLSLISMDG  
AEHTQARRALIGEFTVRRLAALRPRIQQIVDQCIDEMLTDDQHRADLVKT  
LSLPVPSLVICELLGVADHDFQEHATLVRRNTASEVRQHSIDELNA  
YLGALIDRKLASPDLLGRQIARQHRDGTFRSSMVSLAFLLLVAGHET  
TANMISLGVVGLLQHPEQLAMIKDDPKTPLAIEELLRFFTIVDSVTSRV  
ATEDVRFGDTTINAGDGVVVSGLSADWDPTVFADPDRLDLERGARHHLAF  
GFGPHQCLGQNLARLELQIVFDTLFHRIPTLRLAAPLDKIPFKTDAAIYG  
ARELPVAW

>CYP107EU1 (2515975506) *Salinispora arenicola* CNQ748

VTIGQTLPLDVYSPEFTRDPYAI FARLREQAPVCRVTTHRGMSAWMVTRH  
ADVALLADNRLAKDGNRIGELMPRHSTLTGAATGFPPGLTTNMVNSDPP  
DHTRLRHLVGREFTGHRVEGLRPRIEEIVDDLLDGVAACGDEADLAETLA  
RRLPIAVIGELLGVPEADRAEFFRWADTLYGGTASPEALGQAYNAIVDYL  
GRLCDAKRDVPADDLLTALVQVSADEDRLSREELVSMALLLLLVAGHETTS  
KQISNGVLALLLNPEQLKLLKAQPARTAGAVEELLRFEGPSLSASLRETT  
EPVEVAGVVIPEGEFVLLSLASGNRDPEKFPDPDRDLITRSTQGNLAMGH  
GIHHCVGAALARLELEIVLSRLVARFPQMQLAVEADDLEWLVNSFFRAPL  
HLPVSLRR

>CYP166A4 (2515975736) *Salinispora arenicola* CNQ748

MTDAISFELPWARTDKFDPPAVFDALREQRPLARMRYPDGHVGVIVSSYE  
LVREVLGDPRFSHSCAVGHFPVTHQGQVIPTHPQIPGMFIHMDPPEHTRY  
RRLLTGEFTVRRTSRLTGHEGVATEQIEVMREHGAPADLVATFARPLVL  
RVLSGLVGLPYGERDRYLHAVTLLHDAEADPAEAAAAAYEQAGAYFDEVIE  
RRRRQPEDDLISTLVGDGELTGEELRNIVTLLLFAGYETTESALAVGMFA  
LLHHEDQLARLRADPTKIDAAIEELLRYLTVNQYHTYRTASEDIELHGEV  
INKGDSVTVSLPAANRDPARFACPAELDIDRETSGHVAFGFGI HQCLGQN  
LARVELRAGLSALLRAFPNRLRLAVPADEVPLRLQGSVFAVKNLPVCW

>CYP105J3 (2515975757) *Salinispora arenicola* CNQ748

MTDSVAFFPQGRVCPHQ PAPGYRPLAVQRPLAQVTLYDGRRVWAVTTRDLA  
RRLLVGPRISSDRNTNPAWPAIVPIVAAAVNDAQQKVLKIATLVGTDGPE  
HKAQRKMLIPSFTRRMNALRPMIQEIVDQQLDemiQSGAPTDLIPAFAS  
AVPVTVLYRLMGIPDDDHGIFEKLSHQLLAGPNANEAYDQLMGYMSRLIA  
ERRRNPGEVLDLLAQHGANDDADHDELVSTLVVQVAGNHGTTGSMIAL  
GLFALLQHPEQLAELRADPSLMPTAVDELLRFLSVPAVTRLAADDIEVE  
GTIIRKGDGVFFITSLINRDTDVHDAPNSLGWHHASAADHLTFGFGAHQC  
LGQSLARITMEIALGALIDRLPSLRLAVPAEEVPFLPAASLQVIAELPIT  
W

>CYP1198B1 (2515976073) *Salinispora arenicola* CNQ748

MSGELTDQRTAPGAGGNPLRSLMDHGIRANPYPLFGELREAGPTAVEDGS  
VVLFGHEYEHCSQILRHRDMGSDTSEAPSIKGFVVDDAERAGSSIFFMDQP  
GHGRQRKLVSKSFTPRIVKSFGPQITHIVDGLFEDFRDKGELDVVTDLAY  
PVSIGIICDLFGIPDDERDMLKEWSDDLALSTELPTLGAAIGVLNVFTRD  
EINRFGSVAMAAHAYFADLIHRRRKPNPGDDLVSLLATESNGERLTRFEV  
TSVLATLFVAAHESTTNLISGGILALLRNQDQMAVLRNPGGLITNVVDES  
LRYDPPVHLAARMARATTIGGYDLDPGTIVVVLMAAGNRDPRAYENPDV  
FDVNRKIRNVSLAFGAGAHFCIGSGLAKLEAEIAISAFQRLKHPEVDES  
SLEYRRHIVVRGLEHMKVSFQP

>CYP1005A1 (2516216083) *Salinispora arenicola* CNS-991

MSAVLFRSWTKTAGTRWPDVTRVADQSGTEHLVVTRHALVRQVLTQATY  
RPDNALAEAVTPIPVAAALRVLAGHRFRLPPTLANNGGVSHPAIRALVADAL  
HPTKVAAQRPWLTGLVADRVASIRTTLDSGGPVDLYADLTADLPLLVLAR  
LVELPDAPVNAVVKQFARAALFWAPLDADRQLALADEVGRFHQVLRFA  
DTGGGLAAALRATGHSPDVLVGALFFLLVAGQETTSQFLTLLHRLSGEP  
TIRAALRAGSISVADVVEEGLRLEPPIVTVRRVAAVDSTLGGTTVAAGTS  
VLLWLARAGRDPVVAAPDEFPRPGQRGSRRLAFGAGAHRC LGDQLARME  
AAVVVEQATPLLDGVTVVRPPWYPDNLTFRMPDAFVVRR

>CYP211B2 (2516216429) *Salinispora arenicola* CNS-991

MDVSEAI AVLISPSGRLDPYPTYEQLRAHGVPVSQTTAGLFVVTGYAEADM  
VLRDPRFVVLDDDLRDDVFPHWQDSPA KSIARSMLRTNPPDHSRI RRLA  
AGAFTPRRVAAMREVVTAQADELVD EMIQAGR DGARVDFMDMFAYPLPVA  
VICALLGVPAADR SRFRRWAGDLTGILEPEITPEELAGADAGADELRDYF  
TGLIEQRRRAPADDLTALVQAHDADGDRLSGEELLANLVVLLVAGFETT  
TNLLGNGLVVLTRPEAAAAALRDEPD LAPGYVDELLRYDSPVQLTTRTVR  
ESVSFAGTEL PAGSWLLVLLGAANRDPRRFDPARFDPGRAQSQPLSF GA  
GPHYCLGAGLARLEAQVAFPLLLRRLPELALAGRPSRRTRLT LRGYETLP  
ITVGAVTADRGT PAGVAPGTP

>CYP154M21 (2516216524) *Salinispora arenicola* CNS-991

MEKCPYVLDRAGSDIHKEASNL RARGPVTLVELHGGYTAWSVTSYEVAKQ  
LLMDPRISKNTKAHWPEFRDGNVPQDWEL YTWAMD NMQTRDGKEHDRLR  
KLVA PAFTGRQAVKSRPIIEEIVNRLLDDLETA PRGQAVDIKARYFYPLS  
TILVCDLLGIAEEDRDVILHGNVVNSKTTNTAE ESEANLHQWQTALGR LV  
ETKRRDPGDDLTTVVIKAGEDEQTPLTDDEVIGSLHLLIGGGTETTANVL  
CHTVVDM LTHPDQLAMVRSGAVSWESAWEEEVRKDGAVGSM PFRCATDDV  
EIGGV TIAKGDVLV LINYAAA GRDPERYGDAAA EFDITRADKANLSFGYGR  
HRCLGPALATMEAMVALPALFDRFPNLALAVPPNELKPQGT FIFNGYAEV  
PLLLRS

>CYP154M13 (2516216525) *Salinispora arenicola* CNS-991

MSTGRPVVLDPTGRDIHG EADHLRALGPATLV ELPGGVLAWSINSYEVGK  
ALLSAPNVSKSARRHWP AFYNGEIPPDWEMISWVAMDNISTTFGGDHRR L  
RRLTAKAFGSRRAEQVRPMATHMVNTLLDRMADAADAGEVVDLKAAFAYP  
LPGMLVAELIGMSEEARVAAAKVIDMMTATNITPEQAQGVLLGWRDAITD  
LIA LKRAQPGDDITSDLIAARDEDGSLLTEQELVD TIFAILGAGSETTIN  
FFDNAITQLLTHPEQLELVKSGQVSWDDVIEEVLRL ESPLASLPMRFAVE  
DIQLDGVTIHRGDPILINYAALGRDPALHGESAGVFDVTRQHKEHLSFGH

GAHYCLGAGIARMVAKTGLSALFERFPRMTLAVSAKDLVPYPTFIMNGNR  
QLPVHLSGALTWREGEQSALGRA

>CYP105W2 (2516216541) *Salinispora arenicola* CNS-991

MTGYQDRPTGDQPGAPVPSGSTDPGIGAFPLPRRCPFSPPAEYARLRAEH  
PVVRLPMLGGDTAWVVSRRHADVRQVLSDFRMSADRRRPFGFPKFAPTTEGQ  
RQASFANFRPPLNWLDPPEHAICRRQIVDEFVSRRVRQSRALVERVVDTH  
LDALTAAPGADLVSTFAYPVSSQVICEVLGVYPYGEHEFFERRSTLMFRR  
STPADERARCAREIRDFLDVVVTDKHRPGDDLRSRLLYRQRRAGGVDHE  
AVVSMAFVLLVAGHVTTSNMLALSVLALLTHPARLARLARAEPPERFPAAVE  
ELLRYFTVVEAATARTATAEVTIGGVTIAAGEGVVALGQAANRDPVFEH  
PDEFDPDRDARAHLAFGHGRHICPGQHLARLEMEVALSRLFRRPLGLRLT  
MEVSDLPLKEDSNIFGLYALPVAW

>CYP248A2 (2516216548) *Salinispora arenicola* CNS-991

MLADAVTAFDPTAVDVRRDPYPSYHWLLRHDPVHRGAHQVWYVSRFADVR  
AVLGDERFARTGIRRFWTDLVGPGLLSQIVGDIILFQDEPDHGRLRGVVG  
PAFSPSALRRLEPTIEATVNDLLRPARALGAMDVVADLAYPLALRAVLEL  
LGLPAGDANAVGRWSRAVGRTLDRGATAEDMRGHAIAEFADYVERALA  
ERREDGADLLALMLAAHRSQLMsrNEIVSTVVTFFITGHETVASQLGNGL  
LSLLDHPEQLELVRRQPHLVPPQAVEECLRFDPVQSNTRQLAADVELHGR  
RLRRDDVVVVLAGAANRDPGRYDRPDELDIRRDVPVPSMSFGAGMRYCLGS  
YLARLQLRTALGAMVALPDLRLVCNPNELAYQPRTMFRGLTRLPVAFTPA  
G

>CYP154M20 (2516216572) *Salinispora arenicola* CNS-991

MERCPYVLDRAGRDLHGEAKALRARGPVTLVELHGGYTAWSVTSYEIAKQ  
LLVDPRISKNTKETWPEFREGKVPQDWELYTWVAMDNMQTRDGEHDLRL  
KLVAQAFTTRQVAKVRPMIEDIVDRLLDDLEKVPAGEVVDIKGRIFYPLS  
TILVCDLLGIPEADRAEALHGTVVNARTTNSAESEANLHQWQSALSKLV  
ETKRREPGNDITTLIIKAREDEQAPLTDDEVIGSLHLLIGGGTETTSNVL  
CNTLIDLTHPDQMAMIRSGAVGWEEAWEVEVRKDGAVGSMPFRCANADI  
EIGGVTIAKGDVLINIAAAGRDPERYGDTTAEFDITRADKTNLSFGYGR  
HRCLGPALATMEAMISLPALFERFPDLVLAVPRDELKPQGTFFVNGYAEV  
PMLLRS

>CYP107FJ2 (2516216579) *Salinispora arenicola* CNS-991

MSETLSTSVLLADAAEQRAWRAKLRGAGPVHRITTSQGETGWLIVGHEEA  
RNALVDLRLQGRTATVGHGRMPEDLERALNSHMLNVGPPDHTRLRLRVS  
AAFTRRRIEQMRPRIQELTDELLDGLAGADEADLVAGLALPLPMRVLVDL  
FGIPAEDCADFNVTWTKVLTSAGAVDLDRLTAAAGEMVAYLRGLLDRKRQV  
PESDLSALVAVRDGADRLSDELTSMVYLLLTAGYETTVNLIGNGLLNL  
LANPEQLVAFKADPDLQPQVVEEAMRFDSPVQIAVRHSTEPVEIAGQAIP  
SGALILVSLWANRDPDRFTEPEAFRVDRQDNQPLGFGYGFHHHCIGAPLA  
RMEGTIAIGTVIRRFPALRLAHPAGSLTWRASVMVMHGLTALPVHLR

>CYP154M15 (2516216598) *Salinispora arenicola* CNS-991

MNDKCPFAALDVTGQDLHGEAARLREQGPAVLVELPGGVKAWSINRYEVI  
RELLMDRRVTKNARKHWPFAIKGEIPPDWEMISWVAMDNMVTAYGKDHVR  
LRKLVGRAFTQRRADALRPQVVALSTKLLDDLGGATPPGEVVDLRERFAYP  
LPAMLVASLIGMSEAALAACSKVIDMMVHTNVSPEEAQAVLRGWRAAMAD

LIESKRRTPGEDITTDLIAAREEDGSRLSEAEADTIFAILGAGSETTIN  
FFDNAITALLSRPGQLQLLRTGAVTWDDVIDEVLRVESPLAHLPLRYAVE  
DIELDGVTTIPQGDPILVNYAAAGRDPALHGGTADEFDLARGDKTHLSFGY  
GPHYCLGAGIARMVATIGLSMLFERFPDLSLAVPATELKRLPTFIMNGHQ  
TLPVRLTVHAR

>CYP125G6 (2516216623) *Salinispora arenicola* CNS-991

MPTLLNEHVSYDGAIAIVDSDGATSWIRLAERVNRWVHLLRAHGLDTGD  
RLACVTGNRRETFFEVLLAALHTGVTVPVNVHLLTVTEIGHILSDSGSRVV  
ITEELHVKAFAAAADGTAGPVAGLVLGDRVEGFAAVEPLLAASPAEPE  
GQVCGATMLYTSGTTGRPKGVVNNLFVTGAPYARVGRLCDYARSVLGVPR  
RERMLLDGPWYHSSQLFFALLSLLQGSRLVIRPYFDPAATLKTIDDHRT  
VTHLVPTQLVRLLRVDALTRQMFSGASLRRVWHGGGPPPEVKRSMIDWW  
GPVLVEYYGATEGGVVTLIDSAEWLARPGSVGRAVPPSEVVVVDDGGQPV  
AAGQTGQVFFRRRTGNRFHYHNAPEKTQAAYLAPDTFTTYGEVGHVDEDGY  
LFLTGRAQDMIVSGGVNVYPAEVEAALLRHPVVRDAAVIGVADDEFGERV  
VGIVVPETAVDPDDFATHLDAHCRVSLAGFKVPRTYRVVESLPRDETGKL  
RKDALRSKFGWLSGAAMTVPRPATGQPTAHRPDIAHPTTYVSGVPHDEFA  
RRRRDEPVGWVAEPVLTRHTAAGRTATRGSGFWAVTRYEDVVAASRRVTD  
FSSAAKGAFLLTDPRTPADLQQAQQLLVNMDDPHHARLRKLVTSTVFTPRAV  
RGLLASIDAHAAALVAKVVAAGEFDVVTDLAAELPLLVLADLLGVPKQDR  
ALLYGWSNHLVGFDPDFGGGDIDAYRTAMAEAFQYALNLGVERRARPTD  
DLVSLLANAEVDGTRLTDREFCNFWLLLVVAGNETTRHLVAGTMQALTEH  
PGECARLVEGRVPMESAVEELLRWVTPIMQFRRTATRDTEIGGQAVTAGE  
KVVLYYTSANRDATVFAEPDRDLGRTPNRQLSFGIGPHYCLGAHLARAE  
LTALLRVMSPHLGLSLQLTGVPVSRLASNFNFGVKAMPAVIGSR

>CYP107FS2 (2516216661) *Salinispora arenicola* CNS-991

MPVPQGEQNLTTTEVFADPKALFATLGSRQPLHRISLPDGMPAVLVTGNRE  
ARQALSDPRLVRSITAAAPELHKYHPLASDDYALSRHMLFADPPDHGRMR  
KLTVSTAFTRRRVEQMRPRIQQITDDLIDVIAAKGEADLVETLALPLPIAV  
ISEMLGVPPFADRSEFERHAEVLGTGINASSGFDAAIAAGRWFDYLAGLVQ  
QRRREPQDDLISGMLAAQDKGDRLTDVELRSNALLLSAGFETTUNLIAN  
GLLALLRHPAEMAALRSEPNLMATAVDELLRYDSPVSCVYHFAQEPVEI  
GGFEIRSGEHVVIAAAAANHDPTVFADPSRLDLRREGSGQILSFSGIHF  
CLGAPLARLEGEIAFGTVLRLRAGLRLAVPTDSLWVKASFVLHRLRLRPV  
TFTPDRDPNLIDSVHTV

>CYP105CN1 (2516216662) *Salinispora arenicola* CNS-991

MAAPAPQATTSTTPHPPSYPLPRECPYRPSAGTAHLRDAGPVSTVRLYDG  
RTAWLVGTAAAEARALLADSRVSNRADFPNYPVMDERHLSMRATREMAREE  
EGGFAAALFGMDPPEHTRQRLQLLPRFTVRQVAARRPAIQRIVDEHLDAM  
EANGSPADLVSAFATPVPTMVVCTHLGVYPYQDRTRFEPVAGLFEPPDRAD  
AAMAELTAYLHQLIETKQSEPGDGVIDHLIANHLRPGAIDRAELVAIASA  
ILVAGTVTTSSAIALGLTALLTAPGQYAALVDNPDLPVPGAVNEILRYLSL  
VEQLARVATEDIEIGGKLIRAGDGIIVSFAAGNLDPNVTTHPDRLDVALP  
PTNHLAFSHGIHHCIGQNLALLELDIAFRALVSRFPTLRLAVPAEQLPY  
FAGDVPRLACLPTW

>CYP105CP2 (2516216664) *Salinispora arenicola* CNS-991

MTKSMPVQDLPAFFIPRECPYRPSAQHVSLRSGGPMKVRLYNGRTAWLV  
TDSAHAARAVLSDYRRVSIKPYHGNYPLLNEEFKVVDSGYADVLFVDP  
EHTRQRQMIMPSFTLRRRTAVLRPDIQRIVDDKLDEMRRHGAPGDLVTEFA

QPVPMSMVISFLLGVPWEDHEEFETPAHKLFVPELAEEATTELGAYLERLI  
QKKEQPGGTPGGTGLLDDLIRDHLRAGALSRDELVHIAMAMLVAGTDTT  
NVISLGLTLALLDNPDQWAALRDNPDDELIPGAVEEILRYTSLIEAFARVAV  
SDIELNGAVIKEGEGILISSAGVNFDPALAPDPGRFDIRRPPRPSFSFSH  
GIHRCPGDNLARLELEIAFRSLVTRMPNLRITAKPIDQIPSNNDGTLQRL  
YELPVVW

>CYP244A4 (2516216886) *Salinispora arenicola* CNS-991

MSTTTNTELTEAPETNMPVDPGLFDCMPDLIAAARVAPVVRIPYLGRIHAW  
VVCDELVKQALTHPKMGKDIALVPEWMRQPGMLVTAQPDPEYARAMIMS  
DGENHARIRRIHAPVLSRNTERWGERVADKVEGFLDELSQLAGSGGSTEV  
NVVTNYTHKIPLAFISEMLGLPPEAEHRLRGITDIMLYSSDYAARREAIG  
GLFGAVEDWVRNPADLRDGVITGLLAASDGPDAAVTEGEVIVWTLGMIIT  
GYETTGLSLISTSLYEAIRRPPHERPKTDEDITAWIEETLRVHPPFPHTW  
RFPLEDIELGGYLIPKGAPVQVSIAAANRKPGEAGDSFDAERRGHGHLSE  
GLGMHYCIGAPLVRLEAQIAVRGFLRRFPQARLSAETAVQWESEWMIRRM  
SVLPAVLS

>CYP245A7 (2516216890) *Salinispora arenicola* CNS-991

MPSATLPRFALTGWSRENIVNPYPVYQRYREVASVHRGEPGGDAPDTFYV  
FSYDEVVQVLSSNCFGRGRSLDAAKASVPVPAEQKALRAIVENWLVFMDP  
PRHTELRSLNRSFSPRIVTELRPRIARIAQELLSRLGQQVDVLDVESFA  
APLPILVISELLGIPEERRAWLRANALALQEASSSRAGRDVDGYARA EVA  
AQEFTEYFREQVRLRRGRAGGDLITILANAQQRGAPVSLDAIVGTCVHLL  
TAGHETTTNSLAKAVLALREHPAVLDELRGAEGLTTDAVEEFLRYDPPVQ  
AVTRWAHQDTTLGGCDIPRGSRVVALLGSANRDPARFSPDVLDVRRPAD  
RHLSFGLGIHYCLGATLARAELEIGLQALLDGVPRTLGYGTQHVDYADDLV  
FHGPSRLVLVNLGERCK

>CYP105AB8 (2516217099) *Salinispora arenicola* CNS-991

MTETASSRLTDTEFPVQRECPFAEPVEYEQIREQSSIAMVRLTGGGEAWW  
ISGHEQGRAVLADRRFSSDRKANFPFVSTDPAIRKRLHAQPLSLISMDG  
AEHTQARRALIGEFTVRRLAALRPRIQQIVDQCIDEMLTDDQHRADLVKT  
LSLPVPSLVICELLGVPYADHDFQEHATLVRRTASEVRQHSIDELNA  
YLGALIDRKLASPDLLGRQIARQHRDGTFRSSMVSLAFLLLVAGHET  
TANMISLGVVGLLQHPEQLAMIKDDPKTPLAIEELLRFFTIVDSVTSRV  
ATEDVRFQDGTINAGDGVVVVSGLSADWDPTVFADPDRLDLERGARRHHLAF  
GFGPHQCLGQNLARLELQIVFDTLFRHRIPTLRLAAPLDKIPFKTDAAIYG  
ARELPVAW

>CYP211C1 (2516217223) *Salinispora arenicola* CNS-991

MVDVEELLTRLISAQGRQDFFPVYADLHARGPIAALPPEPERRRVA AVAV  
GYDLVGAVLRDPEWSKAPPPGWTEQEILRTLQTSMMFINPPDHGRMRHVF  
AGTFTPRRLGALEPVVNRVADELDRMADAGAGGLDFVAEFAYPLPARVM  
AEFIGIPETELDWYRERVVIDAFLDVAGKTPQRLAAANAAGAE LRAFYG  
ELLARRRRTPGEDLISGLVEAVDAGGVELTEDELVSNLIVLFNASFVTTV  
YMLSNGLPVLLAHPEVAAAALATDPVLTAGAVDEILRLQAPVHLLARAAPR  
DTVLGGVPIPPGQNVLLLLIAAANRDPAHFPDPDRFDPWRSGPPSLAFGLG  
LHYCLGAAVSRLEGRALPRLLSRFPRLRIMEQPVYSGSLFLRGIDKLSV  
SPGEGSTRE

>CYP125A41 (2516217373) *Salinispora arenicola* CNS-991

MTEPRIPAGFDFTDPEVLAHRVPREEFAELRRTAPVWWNAQPRGSAGFDD  
DGYWVVTRYADVMTVSRSDTYSTRENTAIAARLRPDTTREDIEMQRVIML  
NVDPPHEHTKLRAIVSRGFTPRAINALRGSLAERAHIVRDAAVRGVGFV  
TDVACELPLQAI AELIGVPQHRRKVFWDWSNQLIGYDDPAYGTDPLTASA  
ELLAYAMEMAERQRSPSDDLVTCLVNAQIDGELTTDEF GFFVMLLAVA  
GNETTRNAITHGMVAFLDNPEQWELFKAERP KSAVEEII RWATPVNVFQR  
TALVDTV LGGQAI SAGQ RVALFYGSANFDEAVFEDPERFDITRSPNPHLG  
FGGSGAHFCLGANLARLEIELIFNSIADHL PDIRKVAAPQRLRSGWINGI  
RQMPVRYR

>CYP105J3 (2516217524) *Salinispora arenicola* CNS-991

MTDSVAFFPQGRVCPHQ PAPGYRPLAVQRPLAQVTLYDGRRVWAVTTRDLA  
RRLLVDPRISSDRTNPAWPAIVPIVAAVND AQQKVLKIATALVGT DGPE  
HKAQRKMLIPSF TFRMNALRPMIQEIVDQQLDEMIQSGAPTDLIPAFAS  
AVPVTVLYRLMGIPDDDHGIF EKLSHQ LLAGPNANEAYDQLMGYMSRLIA  
ERRRNPGEGLVDDL LAQHGANDDADHDELVSTLVVQVAGNHGTTGSMIAL  
GLFALLQHPEQLAELRADPSLMPTAVDELLRFLSV PDAVTRLAADDIEVE  
GTII RQGDGVFFITSLINRDTDVHDAPNSLGWHHASAADHLTFGFGAHQC  
LGQSLARITMEIALGALIDRLPSLRLAVPAEEVPFLPAASLQVIAELPIT  
W

>CYP247A7 (2516217639) *Salinispora arenicola* CNS-991

MRLTPGAARDIDLDSVNLFDLDLYTSGDPHPIWDMRAQSPLHHQVLADG  
REFWSVTRYDDVCRVLGDYREFTSERGT VVTHLGEDDIAAGKLLTSTDPP  
RHTQVRRRAIGAKLTARAVASWQDRIRDAIVRFLEPALDGDTFDLAEQALL  
LPAIVTGPLLGI PERDWQELVQLTAMVTAPSDPHFQHGSEAATLAISHHE  
LVTYVTEWVKQRRSAGGGDGSLLDHLMSVRVGGAPLTDEEIALDGYSILL  
GANVTTPTVSGTVLALIERPEQFEKAQADPSLLANLVEEGLRWASAACN  
FMRYAVNDTRIGGGTVPAGGAVVAWIGSANRDESYFPDPHQFDITRSGAN  
RQVAFGFGPHYCIGAPLARMTLGIFFEEELVQRFGSIELAGEPQHLSYFI  
AGMTHLP IVAQKRKTP

>CYP107EU1 (2516217773) *Salinispora arenicola* CNS-991

MTIGQTL PDLVYSPEFTRDPYAIFARLREQAPVCRVTTHRGMSAWMVTRH  
VDVRALLADNRLAKDGNRIGELMPRHSTLTGAATGFPPGLTNNMVNSDPP  
DHTRLRHLVGREFTGHRVEGLRPRIEEIVDDL LDGVAACGDEADLAETLA  
RRLPIAVIGELLGVPEADRAEFFRWADTLYGGTASPEALGQAYNAIVDYL  
GRLCDAKRDVPADDLLTALVQVSADEDRLSREELVSMALLLLVAGHETTS  
KQISNGVLALLLNPEQLKLLKAQPARTAGAVEELLRFEGPSLSASLRFTT  
EPVEVAGVVIPEGEFVLLSLASGNRDPEKFPDPDRLDITRSTQGNLAMGH  
GIHHCVGAALARLELEIVLSRLVARFPQMQLAVEADDLEWL VNSFFRAPL  
HLPVSLRR

>CYP1198B1 (2516217780) *Salinispora arenicola* CNS-991

MSGELTDQRTAPGAGGNPLRSLMDHGIRANPYPLFGELREAGPTAVEDGS  
VVLFGHEYEHCSQILRHRDMGSDTSEAPSIKGFVVD DAERAGSSI FMDQP  
GHGRQRKLVS KSFTPRIVKSFGPQITHIVDGLFEDFRDRGELDVVTDLAY  
PVSIGIICDLFGIPDDERDMLKEWSDDLALSTELPTLGAAIGVLNVFTRD  
EINRFGSVAMAAHAYFADLIHRRRKNP GDDLVSLLATESNGERLTRFEV  
TSVLATLFVAAHESTTNLISGGILALLRNQDQMAVLRENPG LITNVVDES  
LRYDPPVHLAARMARATTIGGYDLDPGTIVVVLMAAGNRDP RAYENPDV

FDVNRKIRNVSLAFGAGAHFCIGSGLAKLEAEIAISAFQRLKHPEVDES  
SLEYRRHIVVRGLEHMKVAFQP

>CYP105CH1 (2516217788) *Salinispora arenicola* CNS-991

MSSLPLPTYPKLRDPADPLLPPAEYLAIQSEKPIAKVLLPSGRPTWLITG  
HALARQVLTEPCVSVDRRHFNFPYPVPNPDAVVAQVARWTYILLGDDPPL  
HTERRLLISEFTVRQAQAMRPRIQQLVDFHLEQLIAAGPGADFSKHFAM  
KVPSAVICEMLGVPFADHDYFQERTALQLRRDVPVAAQKQAIDELLAYFE  
QLIQEKSSHPGDDVLSRLIVSNRETEAFDHEALVALGLLLLVGGHETTAN  
TLTLATATMLERPEIAEQLRTDPSLMPSAVEEFLRYFSVAVAVSRIATAD  
LQVGGQLVRAGESMLLVLTNIARDGTVFPEPHRLDIRRNARNHLAFSHGI  
HQCMGQNLARVEMQIALDTVLRRLPGLHLVTPFEELPFKYRHLVWGIEEL  
RVAW

>CYP105BL2 (2516217866) *Salinispora arenicola* CNS-991

MSSHSAAPDPETATPLHTLAPELAFFQFERSAPFDPPQAYTELSGRCPV  
APVSMADGKPSWLITSFEGVRTTSLSDPRFSSDMSHPGFNRTGKPVDDL  
KDTLGAMDGERHRYRRLMTGELTVRRAKAMRPVITQITDEALDQLAAAG  
PGADLVKHVAFVVPSPRVACHLVGIPLSYELFTGMAATLMDSTSSDDQFA  
ALQNMVSYFDTLVTDREHHDRDDLGHMVRRYLATGELTRDMLIRLAWTT  
MAAGQETTAHMIIGLVAALLRHPDQLELLRREPHLLPGAVDELMRYLPLI  
QFGIPRVAMDDVEVDGQTVTAGEGVVALPPLANRDPVFERPDELDVRRN  
ARQHLTFGYGPHQCPAHALARLELEVYGRLLERFPTLRLADSDADLKVQ  
DKDIMYRVSELAVTW

>CYP162P1 (2516218305) *Salinispora arenicola* CNS-991

MGLPSEVDLAEPDLADPDLYAEGDPDAEWAWLRAHRPVYRNPAGATAEFW  
ALTRYRDALQVYRDPSTFSSERGMVLGVDPVAGDPAAGRMLVVTDPPRHP  
KLRRIVSGIFVPRMTMRLEGRVRSVLDQLLHRVVDGAGRCDFVNDVAARL  
PVAIIICELLGVPADQDWMYHLTSTAFGGGDPAGSAEVS AVERAEAYGDI  
LLYYGELAAERRRRPGDDLVTLLVHADLDGEPLDVEDVLVNCTNLIIGGN  
ETTRHAASGGLLALAQRPELWRRRLRETPTAVPTAVEEVLRWTTPGMHVLR  
TATRDTEIGGVPIRAGERVVVWNAANRDEDVFADPQHFDIDRSPNRHIA  
FGQGGHHCLGAALARLELTILFEEMAKQVTNVRLTGPVRRVRSCVLRGIR  
ALPVELVT

>CYP107AY2 (2516219477) *Salinispora arenicola* CNS-991

MTAEPTPIPRSGARLGQEYDQLRKTGDVHQVLLPDASLAWLVTNPEVAAR  
ALADPRLALNRRNSRGGWSGFALPPALDANLLNLDAPDHTRLRLRVGPAF  
SPQRVAALRPGIRRAAEHLLDTLVATSGPTDLVTGYCNPLSVQVIADLMG  
VPEAGRNLRAWTDMLTSYPPDRDAIRQAVTELHGYYVDLIDIKQQQPG  
DDLSSALVTIEQDGDRLSRDELTSLAFLILFAGYENTANLIASAVLWLLD  
HGGLNVVPISEAIEGTLRHEPPAPVAIRRFPTEDIIIGGV TIPAGDTVLL  
SIAAATRGADGNAARLAFNGPHYCLGAALARVEAEALTVLARRLPGLT  
LAVPPSQVRWRPTFRTHGPAELLVSW

>CYP208A12 (2516220231) *Salinispora arenicola* CNS-991

MTLDTITPRVPLGPPRTAALRMLLVMKRDLGMLTSAAARYGDASRLPVG  
HKALWFFNHPRYAKHVLADNSANYHKGIGLVHARRALGDGLLTSEGDLWR  
KQRKVIQPAFQSRRIAQQAGMIAEEAFALVERLRARAGAGPVELTAELTG  
LTLGVLGRSLLDADLAGFDSIGDSFATVQDQAMFELETNNAVPMWIPLPR

QIRFRRARRKLQAVVDTLVDGRAGNLADRVDVLSRLILSARGEADPRVGR  
ERLRDELVTLLLAGHETTASTLGWTLSLIDRHGPVWERLHAEAVEVLGDR  
LPEYDDLRLRYTVMVVEEAMRLFPVWLLPRRALAPDTIGEYRVPANAD  
VVISPYTLHRHPEFWPNPERFDPERFAPGQAADRPYAYLPFGAGPRFCV  
GNNLGMMEAVFVIALLCRHLRLTGVPGHRLVPEPMLSLRIRGGLPLVVRP  
VS

>CYP166A4 (2516221074) *Salinispora arenicola* CNS-991

MTDAISFELPWARTDKFDPPAVFDALREQRPLARMRYPDGHVGVWIVSSYE  
LVREVLGDPRFSHSCAVGHFPVTHQGQVIPTHPQIPGMFIHMDPPEHTRY  
RRLLTGEFTVRRTSRLTGHEVERVATEQIEVMREHGAPADLVATFARPLVL  
RVLSGLVGLPYGERDRYLHAVTLLHDAEADPAEAAAAAYEQAGAYFDEVIE  
RRRRQPEDDLISTLVGDGELTGEELRNIVTLLLFAGYETTESALAVGMFA  
LLYHEDQLARLRADPTKIDAAIEELLRYLTVNQYHTYRTASEDIELHGEV  
INKGDSVTVSLPAANRDPARFACPAELDIERETS GHVAFGFGI HQCLGQN  
LARVELRAGLSALLRAFPNRLRLAVPADEVPLRLQGSVFAVKNLPVCW

>CYP107Q4 (2516221098) *Salinispora arenicola* CNS-991

MTTTAETS AETIDLFSPEVVADPFGWYARLREETGPTTGTLNIGTMMGGP  
EMWLVTRYEDVRQVLTDPRLTNPPADSPLEDIRAGVFKRLDFPPDLIPW  
MANLLNVSDGEDHTRLRKLVS YALTAHRIGKLRPRVEKITADLLDKLAED  
GKDGSPVDLVEEYCYPLPVTVICELVGIDEPRPHWRWAGDSMATMNGER  
IPTTLVKCIELARELIANRAEPQDDLVTALVQAQAEQDNVSDDEIIGI  
LFSLVTAGHQTTTYLIGNSVILLLENPDQLARLKENPSMWPAVRELQRL  
GPIQFAQPRFSEDIELGGVTIPRGAPVAPLLLAANTDPRRFPDPNKLII  
DRLAVGSEGLGF GKGIHRCLGQHLAYQEA EVALQGLFTRFPDLSLAVPR  
EEIPWILRPGFTTRTTLPLKLV

>CYP105G5 (2516221099) *Salinispora arenicola* CNS-991

MTIETTETTPPADDSLAPLPRQFMQRDDPSKLPALAAAEQSPVGRSTL  
PDGDPFWMVSGYDEARAVLSDPRFSSDRFRYHPRFKKLSGQLGERLRNDK  
ARAGSFINMDPPEHTRYRKLLTGQFTVRRMRQLTVRIEQIVTEQVDVMLA  
EGNSADLVSAFAVPVPSLMICELLGVRYEDRTEFQRRRAAGLLQTDLPKQ  
AVENLEAQRAFMQRLVTDKRRTPADDMISGLVHHAGAEPPLTDDDELVGIA  
TLLLFAGLDTTASMLGLGMFMLLQRP EQMAVLRDDPSRIGDAVEELLRYL  
TVVSTGLFRFAKEDVVLGDEHIPAGSTVVVSLMAANRDGRHWPEPETLDV  
TRVRSSHLAFGHGVHQCLGQQQLARIELTVGITELLRRLPNVRLAVPPADV  
PLRNDMITYGVHRLPILWDTP

>CYP1051A1 (2516221119) *Salinispora arenicola* CNS-991

MATDAAITRARTVPAWKALPAAVRDTHRAFDVGVNWSGDGVVRVSLGVSR  
PYLVTNPAHVQEVLHERAAIYPRGDDTALWRSVRKLVGDGILAEGDAAWAA  
SRRVLAPMFRPARINAMVDTMADAIAGAVDDLHGAATAGTPIDVGRELSR  
IVCSAIMRVFFADRITVRDALRIMKAQETIVTAMAPRILAPLVPWWIPMP  
GDRRFRAAVRSIDDI LLPVLRQAQRQPDDGDDL SRLVVRARADDGQALSE  
KRMRDDLVSMAVTTTETSTVVL TWMP LLANHPDVANRLYDEIDRVVGGG  
PVRGDHLAELTYTRMVLDELLRLYPAGWILPRRAATTDVLGGVRINKGAT  
VILSPYVTQRMATAWWGPTAEAFDPERFAAGREAADGRHRYAYYPFGVGMH  
RCLGEHLFNLEAILIVATLLSRFRFALTDTSMPGVKVAAS TRPARTVEMI  
LKPVAVPPAR



>CYP244A4 (2562106138) *Salinispora arenicola* CNY244

MSTTTNTELTEAPETNMPVDPGLFDCMPDLIAARVAPVVRIPYLGRIHAW  
VVCDELVKQALHTPKMGKDIALVPEWMRQPGMLMVTAPDPEYARAMIMS  
DGENHARIRRIHAPVLSRPNTERWGERVADKVEGFDELDSQAGSGGSTEV  
NVVTNYTHKIPLAFISEMLGLPPEAEHRLRGITDIMLYSSDYAARREAIG  
GLFGAVEDWVRNPADLRDGVITGLLAASDGPDAAVTEGEVIVWTLGMIIT  
GYETTGSLISTSLYEAIRRPPHERPKTDEDITAWIEETLRVHPPFPHTW  
RFPLEDIELGGYLIPKGAPVQVSIAAANRKPGEAGDSFDAERRGHGHLST  
GLGMHYCIGAPLVRLEAQIAVRGFLRRFPQARLSAETAVQWESEWMIRRM  
SVLPAVLS

>CYP245A7 (2562106142) *Salinispora arenicola* CNY244

MPSATLPRFALTGWSRENIVNPYPVYQRYREVASVHRGEPGGDAPDTFYV  
FSYDEVVQVLSSNCFGRGRSLDAAKASVPVPAEQKALRAIVENWLVFMDP  
PRHTELRLSLNRSFSPRIVTELPRPRIARIAQELLSRLGQQVDVDLIVESFA  
APLPILVISELLGIPEERRAWLRANALALQEASSSRAGRVDVGYAQAEVA  
AQEFTEYFREQVRLRRGRAGGDLITILANAQERGAPVSLDAIVGTCVHLL  
TAGHETTTNSLAKAVLALREHPAVLDELRGAEGLTTDAVEEFLRYDPVQ  
AVTRWAHQDCTLGGCDIPGRSRVVALLG SANRDPARFPSPDVLVRRPAD  
RHLSFGLGIHYCLGATLARAELEIGLQALLDGVPRTLGYGTQHVDYADDLV  
FHGPSRLVLVNLGERCT

>CYP208A12 (2562107007) *Salinispora arenicola* CNY244

MTLDTITPRVPLGPPRTAALRMLLVMKRDRLGMLTSAAARYGDASRLPVG  
HKALWFFNHPRYAKHVLADNSANYHKGIGLVHARRALGDGLLTSEGDLWR  
KQRKVIQPAFQSRRIAQQAGMIAEEAFALVERLRARAGAGPVELTAELTG  
LTLGVLGRSLLDADLAGFDSIGDSFATVQDQAMFELETNAVPMWIPLPR  
QIRFRARRRKLQAVVDTLVDGRAGNLANRVDVLSRLILSARGEADPRVGR  
ERLRDELVTLLLAGHETTASTLGWTLSLIDRHGPVWERLHAEAVEVLGDR  
LPEYDDLRLRLRYTVMVVEEAMRLFPPVWLLPRRALAPDTIGEYRVPANAD  
VVISPYTLHRHPEFWPNPERFDPERFAPGQAADRPRYAYLPFGAGPRFCV  
GNNLGMMEAVFVIALLCRHLRLTGVPGYRLVPEPMLSLRIRGGLPLVVRP  
VS

>CYP105J3 (2562107202) *Salinispora arenicola* CNY244

MTDSVAFFPQGRVCPHQPAPGYRPLAVQRPLAQVTLYDGRRVWAVTTRDLA  
RRLLVDPRISSDRNTNPAWPAIVPIVAAAVNDAQQKVLKIATALVGTGPE  
HKAQRKMLIPSFTFRMRNALRPMIQEIVDQQLEDEMIKSGAPTDLIPAFAS  
AVPVTVLRLMGIPTDDHGI FEKLSHQLLAGPNANEAYDQLMGYMSRLIA  
ERRRNPGEGLDDLLAQHGANDDADHDELVSTLVVQVAGNHGTTGSMIAL  
GLFALLQHPEQLAELRADPSLMPTAVDELLRFLSVPAVTRLAADDIEVE  
GTIIRKGDGVFFITSLINRDTDVHDAPNSLGWHHASAADHLTFGFGAHQC  
LGQSLARITMEIALGALIDRLPSRLAVPAEEVPFLPAASLQVIAELPIT  
W

>CYP125A41 (2562107378) *Salinispora arenicola* CNY244

MTEPRIPAGFDFTDPEVLAHRVPREEFAELRRTAPVWWNAQPRGSAGFDD  
DGYWVVTRYADVMTVSRSDTYSTRENTAIARLRPDTTREDIEMQRVIML  
NVDPPHETKLRAIVSRGFTPRAINALRGSLAERAHIVRDAAVRGVGDV  
TDVACELPLQAI AELIGVPQHRRKVFWDWSNQLIGYDDPAYGTDPLTASA  
ELLAYAMEMAERQSPSDDLVTCLVNAQIDGHELTDEFGGFFVMLLAVA  
GNETTRNAITHGMVAFLDNPEQWELFKAERP KSAVEEIIIRWATPVNVFQR

TALVDTVLGQQAISAGQRVALFYGSANFDEAVFEDPERFDITRSPNPHLG  
FGGSGAHFCLGANLARLEIELIFNSIADHLPDIRKVAAPQRLRSGWINGI  
RQMPVRYR

>CYP211C1 (2562107526) *Salinispora arenicola* CNY244

VVDVEELLTRLYSAQGRQDPFFVYADLHAQGPIAALPPEPERRRVA AVAV  
GYDLVGAVLRDPEWSKAPPPGWTEQEILRTLQTSMMFINPPDHGRMRHVF  
AGTFTPRRLGALEPVVNRVADELDRMADAGAGGLDFVAEFAYPLPARVM  
AEFIGIPETELDWYRERVVIDAFLDVAGKTPQRLAAANAAGAE LRAFYG  
ELLARRRTPGEDLISGLVEAVDAGGVELTEDELVSNLIVLFNASFVTTV  
YMLSNGLPVLLAHPEVAAAALATDPVLTAGAVDEILRLQAPVHLLARAA PR  
DTVLGGVPI PQGQNVLLLLIAAANRDP AHFPDPDRFDPWRSGPPSLAFGLG  
LHYCLGAAVSRLEGRALPRLLSRFPRLRIMEQPVYSGSLFLRGIDKLSV  
SPGEGSTRE

>CYP105BL2 (2562107575) *Salinispora arenicola* CNY244

MSSHSAAPDPETATPLHTLAPELTFPQFERSTPFDPQAYTELSGRCPV  
APVSMADGKPSWLITSFEGVRTTSLSDPRFSSDMSHPGFPDRTGKPVDDL  
KDTLGAMDGERHRYRRLMTGELTVRRAKAMRPVITQITDEALDQLAAAG  
PGADLVKHVAFVVP SRVACHLVGIPLSDYELFTGMAATLMDSTSSDDQFA  
ALQNMVSYFDTLVTDREHHRD DLLGHMVRRYLATGELTRDMLIRLAWTT  
MAAGQETTAHMI GLGVAALLRHPDQLELLRREPHLLPGAVDELMRYLPLI  
QFGIPRVAMDDVEVDGQTVTAGEGVVALPPLANRDP AVFERPDELDVRRN  
ARQHLTFFGYGPHQCPAHALARLELEVYGRLLERFPTLRLADSDADLKVQ  
DKDIMYRVSELA VTW

>CYP107AY2 (2562108145) *Salinispora arenicola* CNY244

MTAEPTPIPRSGARLGQEYDQLRKTGDVHQVLLPDASLAWLV TNPEVAAR  
ALADPRLALNRRNSRGGWSGFALPPALDANLLNLDAPDHTRLRRLVGP AF  
SPQ RVAALRPGIRRAAEHL DTLVATSGPTDLVTGYCNPLSVQVIADLMG  
VPEAGRTNLRATDTMLTSYPPDRDAIRRAVTELHG YVVLDIDIKQQQPG  
DDLSTLVTIEQDGDRLSRDELTS LAFLILFAGYENTANLIASAVLWLLD  
HGGLNVVPISEAIEGTLRHEPPAPVAIRRFPTEDIIIGGV TI PAGDTVLL  
SVAAATRGADGNAARLAFGNPHYCLGAALARVEAE EALTVLARRLPGLT  
LAVPPSQVRWRPTFRTHGPAELLVGW

>CYP105CT1 (2562108171) *Salinispora arenicola* CNY244

MNSPNHMPADRSLTAPTSGCPMALSRGRVGLDVADEISELRDGGRLGRIT  
TAFGQEATLITRYDEVRAQMADSVVFNVAGVPSPPALVDGGFDTESVRRR  
RTVGNLIMLDPPEHTRLRRMVAAWFTTRRVERLRPRVVEIIDAALDEMER  
SGPPVDLVAMFAKTVPI TVICELIGVPEELRERYRRRAERAVSASAVSTP  
LDELRLREAGWVSRELIEYHRENPSDDIIGMLLREHGTD SHDDGITDDE  
LVGLANALLIAGHETTTQMLSMGTLALLRHPDQLALLRDDPSIVAGAVEE  
LLRYVGVLHGGFVRVATRDTRLGGHRIHAGELVVPALTAANRDPRL LTDG  
DRLDITRPPTSHVAFGHGVHFCIGAPLARMELREAF PALLRFPGLRLAV  
PDSELEFTQGT TVYSLRGLPVTW

>CYP154M5 (2562108187) *Salinispora arenicola* CNY244

VEQSCP YKLDVTGRDVHAEGEAIRARGPVAQVELPGGVQGWSVTGYQAAR  
QVLADPRFAKDPKKWPAYTSGAIPPNWPLIGWLLMDNMTTNDGADHQRLR  
KLVS HGFTPRQVERTRPLIVKIVNDLLDGLSSAGPDEVVDLKGRFATPLP

ARVICDMFGVPEALRASVLRGAQVNVNTSSISGEEAEANVEQWHRELLELV  
EAKREKPDEDMASLLIAAKEEDGSTLTQEEVVGTLHMLGAGSETLMNAL  
SYAVLGMLSNPGQYEMVRNGTSSWDDVIEETLRAQAPVAQLPLRYATEDV  
AVGGAVIKAGDPVLMGFTAIGRDPVHGETAGDYDITREDKTHLSFGHGV  
HFCLGAPLARLELKIALPALFERFPHMTLAVRPDQLEPQGTFFIMNGHREL  
PVRLGQPATVLA

>CYP105AB8 (2562108778) *Salinispora arenicola* CNY244

MTETASSRLTDTEFPVQRECPFAEPVEYEQIREQSSIAMVRLTGGGEAWW  
ISGHEQGRAVLADRRFSSDRKANFPFVSTDPAIRKRLHAQPLSLISMDG  
AEHTQARRALIGEFTVRRLAALRPRIQQIVDQCIDEMLTDDQHRADLVKT  
LSLPVPSLVICELLGVPYADHDFQEHATLVRRTASEVRQHSIDELNA  
YLGALIDRKLASPDDDLLGRQIARQHRDGTFRSSMVSLAFLLLVAGHET  
TANMISLGVVGLLQHPEQLAMIKDDPKTPLAIEELLRFFTIVDSVTSRV  
ATEDVRFGDDTTINAGDGVVVSGLSADWDPTVFADPDRDLERGARHHLAF  
GFGPHQCLGQNLARLELQIVFDTLFRHRIPTLRLAAPLDKIPFKTDAAIYG  
ARELPVAW

>CYP166A4 (2562108976) *Salinispora arenicola* CNY244

MTDAISFELPWARTDKFDPPAVFDALREQRPLARMRYPDGHVGWIVSSYE  
LVREVLGDPRFSHSCAVGHFPVTHQGQVIPTHPQIPGMFIHMDPPEHTRY  
RRLLTGEFTVRRTSRLTGHEGVATEQIEVMREHGAPADLVATFARPLVL  
RVLSGLVGLPYGERDRYLHAVTLLHDAEADPAEAAAAAYEQAGAYFDEVIE  
RRRRQPEDDLISTLVGDGELTGEELRNIVTLLLFAGYETTESALAVGMFA  
LLHHEDQLARLRADPTKIDAAIEELLRYLTVNQYHTYRTASEDIELHGEV  
INKGDSVTVSLPAANRDPARFACPAELDIDRETSGHVAFGFGIHQCLGQNL  
LARVELRAGLSALLRAFPNLRALVPADEVPLRLQGSVFAVKNLPVCW

>CYP1005A1 (2562109416) *Salinispora arenicola* CNY244

VSAVLFERSWTKTAGTRWPDVTRVADQSGTEHLVVTRHALVRQVLTDAQTY  
RPDNALAEAVTPVPVAALRVLAGHRFRLPPTLANNGGVSHPAIRALVADAL  
HPTKVAAQRPWLTGLVADRVASIRTTLDSSGPPVDLYADLTADLPLLVLAR  
LVELPDAPVNAVQKFARAALFLWAPLDADRQLALADEVGRFHQVLREFA  
DTGGGLAAALRATGHSPDVLVGALFFLLVAGQETTSQFLTLLHRLSGEP  
TIRAALRAGSISVADVVEEGLRLEPPIVTVRRVAAVDSTLGGTTVAAGTS  
VLLWLARAGRDPVVAAPDEFPRPGQRGSRRHLAFGAGAHRCCLGDQLARME  
AAVVVEQATPLLDGVTVVRPPWYPDNLTFRMPDAFVVRR

>CYP1051A1 (2562109667) *Salinispora arenicola* CNY244

MATDAAITRARTVPAWKALPAAVRDTHRAFDVGNWSDGDVVRVSLGVSR  
PYLVTNPAHVQEVLHERAAIYPRGDDTALWRSVRKLVGDGILAEGDAWAA  
SRRVLAPMFRPARINAMVDTMADAIAGAIDDLHGAATAGTPIDVGRELSR  
IVCSAIMRVFFADRITVRDALRIMKAQETIVTAMAPRILAPLVPWWIPMP  
GDRRFRAAVRSIDILLPVLRQAQRQPDDGDDLLSRLVRARADDGRALSE  
KMRDDLVSMVAVTTETSTVVLTWLWPLLANHPDVANRLYDEIDRVVGGG  
PVRGDHLAELTYTRMVLDELLRLYPAGWILPRRAATDILGGVRINKGAT  
VILSPYVTQRMTAWWGPTAEAFDPERFAAGREAADGRHRYAYYPFGVGMH  
RCLGEHLFNLEAILIVATLLSRFRFALTDTSMPGVKVAASTRPARTVEMI  
LKPVAPVPAR

>CYP105G5 (2562109691) *Salinispora arenicola* CNY244

LTIIETTETPPADDSLRAPLPRQFMQRDDPSKLPALAAAEQSPVGRSTL  
PDGDPFWMVSGYDEARAVLSDPRFSSDRFRYHPRFKKLSGQLGERLRNDK  
ARAGSFINDPPEHTRYRKLLTGQFTVRRMRQLTVRIEQIVTEQVDVMLA  
EGNSADLVSAFAVPVPSLMICELLGVRYEDRTEFQRRRAAGLLQTDLPKQ  
AVENLEAQRAFMQRLVTDKRRTPADDMISGLVHHAGAEPPLTDDELVGIA  
TLLLFAGLDTTASMLGLGMFMLLQRPEQMAVLRDDPSRIGDAVEELLRYL  
TVVSTGLFRFAKEDVVLGDEHIPAGSTVVVSLMAANRDGRHWPEPETLDV  
TRVRSSHLAFGHGVHQCLGQQQLARIELTVGITELLRRLPNVRLAVPPADV  
PLRNDMITYGVHRLPILWDTP

>CYP107Q4 (2562109692) *Salinispora arenicola* CNY244

MTTTAETSATIDLFSPEVVADPFGWYARLREETGPTTGTNLNIGTMMGGP  
EMWLVTTRYEDVRQVLTDPRFLTNPADSPLEDIRAGVFKRLDFPPDLIPW  
MANLLNVSDGEDHTRLRKLVSALTAKHRIGKLRPRVEKITADLLDKLAED  
GKDGSPVDLVEEYCYPLPVTVICELVGIDEPRPHWRAGDSMATMNGER  
IPTTLVKCIELARELIAKRAEPQDDLVLTALVQAQAEQNRVSDDEIIGI  
LFSLVTAGHQTTTYLIGNSVILLLENPDQLARLKENPSMWFPQAVRELQRL  
GPIQFAQPRFPSEDIELGGVTIPRGAPVAPLLLAANTDPRRFPDPNKLII  
DRLAVGSEHGLGFKGKIHRCGLQHAYQEAEEVALQGLFTRFPDLSLAVPR  
EEIPWILRPGFTRTRTLPLKLV

>CYP107FS2 (2562109988) *Salinispora arenicola* CNY244

MPVPQGEQNLTTTEVFADPKALFATLGSRQPLHRISLPDGMFAVLVTGNRE  
ARQALSDPRLVRSITAAAPELHKYHPLASDDYALSRHMLFADPPDHGRMR  
KLVSTAFTRRRVEQMRPRIQQITDDDLIDVIAAEGEADLVETLALPLPIAV  
ISEMLGVFPFADRSEFERHAEVLTGINASSGFDALIAAGRWFDLYLAELVQ  
QRRREPQDDLISGMLAAQDKGDRLTDVELRSNALLLSAGFETTVNLVAN  
GLLALLRHPEAMAALRSEPNLMTTAVDELLRYDSPVSCVTYHFAQEPVEI  
GGFEIRSGEHVIVAAAAANHDPTVFADPSRLDLRREGSGQILSFSGIHF  
CLGAPLARLEGEIAFGTVLRLRAGLRLAVPTDSLWVKASFVLHRLRLRPV  
TFTPDRAFPNIDSVHTV

>CYP105CN1 (2562109989) *Salinispora arenicola* CNY244

MAAPAPQATQSTTPHPPSYPLPRECPYRPSAGTARLRDAGPVSTVRLYDG  
RTAWLVTGAAEARALLADSRVSNRADFPNYPVMDERHLSMRATREMAREE  
EGGFAAALFGMDPPEHTRQRLQLLPRFTVRQVAARRPAIQRIVDEHLDAM  
EANGSPADLVSAFATPVPTMVVCTHLGVVPYQDRTRFEPAVAGLFEPDRAD  
AAMAELTAYLHQLIETKQSEPGDGVIDHLIANHLRPGAIDRAELVAIASA  
ILVAGTVTTSSAIALGTLALLTAPGQYAALVDNPDLPVPGAVNEILRYLSL  
VEQLARVATEDIEIGGKLIRAGDGIIVSFAAGNLDPNVTTHPDRLDVALP  
PTNHLAFSHGIHHCIGQNLALLELDIAFRALVSRFPTLRPAVPAEQLPY  
FAGDVPRLACLPTW

>CYP105CP2 (2562109991) *Salinispora arenicola* CNY244

MTKSMPVQDLPAFPPIPRECPYRPSAQHVSLRSGGPMKVRLYNGRTAWLV  
TDSA HARAVLSDYRRVSIKPYHGNYPLLNEEFKVVDSGYADVLFVGDPP  
EHTRQRMIMPSFTLRRTAVLRPDIQIRIVDDKLDMMRHGAPGDLVTEFA  
QPVPMSMVSFLLGVFWEDHEEFETPAHKLFVPELAAEEATTELGAYLERLI  
QKKEQPGGTPGGTGLLDDLRDHLRAGALSRLDELVHIAMAMLVAGTDTT  
NVISLGTALLDNDPDQWAALRDNPDDELIPGAVEEILRYTSLIEAFARVAV  
SDIELNGAVIKEGEGILISSAGVNFDPALAPDPGRFDIRPPRPSFSFSH  
GIHRCPGDNLARLELEIAFRSLVTRMPNLRKAPIDQIPSNNDGTLQRL  
YELPVVW

>CYP105W2 (2562110371) *Salinispora arenicola* CNY244

MTGYQDRPTGDQPGAPVPSGSTDPGIGAFPLPRRCPPFSPPAEYARLRAEH  
PVVRLPMLGGDTAWVVSRRHADVRQVLSDPRMSADRRRPGFPKFAPTTEGQ  
RQASFANFRPPLNWLDPPEHAICRRQIVDEFVRRVRQSRALVERVVDTH  
LDALTAAPGADLVSTFAYPVPSQVICEVLGVPYGEHEFFERRSTLMFRR  
STPADERARCAREIRDFLDMVVTDKERRPGDDVLSRLLYRQRAGGMDHE  
AVVSMAFVLLVAGHVTTSNMLALSVLALLTHPARLARLRAEPPERFPAAVE  
ELLRYFTVVEAATARTTTAEVTIGGVTTAAGEGVVALGQAANRDP RVFEH  
PDEFDPDRDARAHLAFGHRHICPGQHLARLEMEVALSRLFRRLPGLRLT  
MEVSDLPLKEDSNIFGLYALPVAW

>CYP248A2 (2562110379) *Salinispora arenicola* CNY244

VLADAVTAFDPTAVDVRRDPYPSYHWLLRHDPVHRGAHQVWYVS RFADVR  
AVLGDERFARTGIRRFWTDLVGPGLLSQIVGDIILFQDEPDHGRLRGVVG  
PAFSPSALRRLEPTIEATVNDLLRPARALGAMDVVADLAYPLALRAVLEL  
LGLPAGDANAVGRWSRAVGRTLDRGATAEDMRRGHAAIAEFADYVERVLA  
ERREDGADLLALMLAAHRSQIMSRNEIVSTVVTFFITGHE TVASQLGNGL  
LSLLDHPEQMELMRQPHLLPHAVEECLRFDPVQSNT RQLAADVELHGR  
RLRRDDVVVVLAGAANRDPGRYDRPDELDIRRDPVPSMSFGAGMRYCLGS  
YLARLQLRTALGAMVALPDLRLACNPNELAYQPRTMFRGLTRLPVAFTPA  
G

>CYP211B2 (2562110444) *Salinispora arenicola* CNY244

MDVSEAI AVLISPSGRLDPYPTYEQ LRAHGVPVSRTTAGLFVVTGYAEADM  
VLRDPRFVVLDLDDLRDDVFPHWQDSPAIXIARSMLRTNPPDHSRIRRLA  
AGAFTPRRVAAMREVVTQADELVD EMIRAGRDGARVDFMDMFAYPLPVA  
VICALLGVPAADRSRFRRWAGDLTGILEPEITPEELAGADAGADELRDYF  
TGLIEQRRRAPADDLTALVQAHDADGDRLSGEELLANLVVLLVAGFETT  
TNLLGNGLVVLLTRPEAAAAALRDEPD LAPGYVDELLRYDSPVQLTTRTVR  
ESVSFAGTELPTGSWLLVLLGAANRDPRRFPDPARFDPGRAQSQPLSFGA  
GPHYCLGAGLARLEAQVAFPLLLRRLPELALAGRPSRRTRLTLRGYETLP  
ITVGAVTADRGTAGVAPGTP

>CYP105CH1 (2562110527) *Salinispora arenicola* CNY244

VSSLPLPTYPKLRDPADPLLPAPAEYLAIQSEKPIAKVLLPSGRPTWLITG  
HALARQVLTEPCVSVDRRHNPFPYPVPNPDAVVAQVARWTYILLGDDPPL  
HTERRRL LISEFTVRQAQAMPRIQQLVDFHLEQLIAAGPGADFSKHFAM  
KVPSAVICEMLGVPFADHDYFQERTALQLRRDVPVAAQKQAIDELLAYFE  
QLIQEKSSHGDDVLSRLIVSNRETEAFDHEALVALG LLLL VGGHETTAN  
TLTLATATMLERPEIAEQLRDPSLMPSAVEEFLRYFSVAVAVSRIATAD  
LQVGGQLVRAGESMLLV LNTIARDGTVFPEPHRLDIRRNARNHLAFSHGI  
HQCMGQNLARVEMQIALD TVLRRLPGLHLVAPFEELPFKYRHLVWGIEEL  
RVAW

>CYP107EU1 (2562110738) *Salinispora arenicola* CNY244

VTIGQTL PDLVYSPEFTRDPYAI FARLREQAPVCRVTTHRGMSAWMVTRH  
ADVRALLADNRLAKDGNRIGELMPRHSTLTGAATGFPPGLTTNMVNSDPP  
DHTRLRHLVGREFTGHRVEGLRPRIEEIVDDLLDGVAACGDEADLAETLA

RRLPIAVIGELLGVPEADRAEFFRWADTLYGGTASPEALGQAYNAIVDYL  
GRLCDAKRDPVADDLLTALVQVSADEDRLSREELVSMALLLLVAGHETTS  
KQISNGVLALLLNPEQLKLLKAQPARTAGAVEELLRFEGPSLSASLRFTT  
EPVEVAGVVIPEGEFVLLSLASGNRDPEKFPDPDRLDITRSTQGNLAMGH  
GIHHCVGAALARLELEIVLSRLVARFPQMQLAVEADDLEWLVNSFFRAPL  
HLPVSLRR

>CYP1198B1 (2562110922) *Salinispora arenicola* CNY244

MSGELTDQRTAPGAGGNPLRSLMDHGIRANPYPLFGELREAGPTAVEDGS  
VVLFGHEYHCSQILRHRDMGSDTSEAPSIKGFVVDDAERAGSSIFFMDQP  
GHGRQRKLVSKSFTPRIVKSFGPQIAHIVDGLFEDFRDRGELDVVTDLAY  
PVSIGIICDLFGIPDDERMLKEWSDDLALSTELPTLGAAIGVLNVFTRD  
EINRFGSVAMAAHAYFADLIHRRRNKPGDDLVSLLATESNGERLTRFEV  
TSVLATLFVAAHESTTNLISGGILALLRNQDQMAVLRENPGITNVVDES  
LRYDPPVHLAARMARARTTIGGYDLDPGTIVVVLMAAGNRDPAYESP  
FDVNRKIRNVSLAFGAGAHFCIGSGLAKLEAEIAISAFQRLKHPEVDES  
SLEYRRHIVVRGLEHMKVSFQP

>CYP154AJ2 (2515924165) *Salinispora pacifica* CNT854

VDDSLFVIDPAGADIHGEGARLRASGPITRVLLPGGVEAWSVTGYHAAR  
QVLADARFAKNARQHWPAYVNGDLGPDFPLIAWARMDNMSTADGESHA  
RRLVAGAFSPQRIALQPRVERAVARALDELAAQAAERPGEPIDLKERYA  
HPVAARVIGELLGVDPDGDGILDRAGYIESTPQRAAEFALLRSKIETL  
VAAKRRAPGEDLISDLIAAQPSGCPVAGAGAGSDAELVGLAQLMLNTGAE  
PARNLITNTVLALLTRPGQRAQVMSGEVSWGDVVEETLRDAPVAHL  
PFRFATEDVTIAGTTISRGDVPLVGYAATGRDPELHGATAGEFDARRAD  
KRHLAFGHGVHRCVGPALTRMEVRIAVEALFTRFPGVRLAVEPKELVGQ  
GTFIMNGRRELPVQGLCAQP

>CYP211C9 (2515924223) *Salinispora pacifica* CNT854

VPDIEGLLARLYSARGRQDPYPVYADLHAQAAIAALTPGPGRQRVAAV  
GYDLVAAVLRDPEWCKQPPPGWRDQEILRILQSSMMFINPPDHGRMRH  
VFAETFTPRRLGALELVINRVTDDELDRMADAGPGEVDFVAEFAYPLP  
ARVMAEFIGIPTTELAWYRERVDRIDAFLDVAGKTPERLAAANAAGAE  
LRAFYRELLARRRRTPEGDLISGLVEAVDAGGVELTEDELISNLIVLF  
NASFVTTVYLLSNGLPVLLAHPQVAAALADNPPELAAGAVDEILRLQTP  
VHLLARAAPRDTVLGGVSIPOGQNVLLLIAAANRDPAHFPDPDRFDPR  
RSGPSSLAFLGLLHYCLGAAVSRLEGRALPRLLSRFPRLRILEQPVYSG  
SLFLRGIDKLSVSPGGRSIRE

>CYP125A65 (2515924357) *Salinispora pacifica* CNT854

MTEPRIPVGFDFDPTVLERRVPREEFAELRRAPVWVNVQPRGSAGFDD  
DGYWVVTRYADVMASRDSETYSTRENTAIARFQPGTTRADLEMQRVIML  
NVDPPPEHTKLRAIVSRGFTPRAIHALRGSLAERAERIVRDAAVRGTGDF  
VTDVACELPLQAIABELIGVPQHHRKVFWDWSNQLIGYDDPAYGVDPMA  
AAAAELLGYAMEMADERQRNPSSDDLVTKLVAQIDGHLTTDEFGGFFVML  
LAVAGNETTRNAITHGMLAFLEHPEQWELFKAERPRSAVEEIIRWATPV  
NVFQRTALVDTTLGGQAIASAGQRVALFYGSANFDESVEEPPERFDITR  
SPNPHLGFEGSGVHFCLGANLARLEIELIFNSIADHMPDIRKAADPQRLR  
SGWINGIREMPVRYR

>CYP107AX10 (2515924383) *Salinispora pacifica* CNT854

MTAQAPAPVFDQRLLRDPHRRYNALRDQAPVHHVVRTPDGAPAWLVTRYDDV  
RAAFTDPRLSVDKRFSGTDGEHGSSLPELDAHLLNRDPPDHTRLRLRLAA  
AAFTPRRVADLRPAVERTVSTLLDGLAGNDHAELIGSLASPLPLQVMHEL  
LGLPTQTSVDFRTWTNTLLSADANQPAQSRSAMANMRRFLVEQVAHKRAR  
PGDDLLTGLLCVREDDDGLTDDDELVAMLFLLMFAGYDNTAALIGNVIHAL  
LTNAELAEAVRTRSLALDELVDGVLRWNPSFPLAVRRFAREPLTIAGQAI  
PAGDRIWLCLASANRDPAHFTEPDEIGIADMRRPHLSFGHGIHYCLGAPL  
ARLQTTVAVASLFDRFPGIRLAMPVQDIQWRESFRLRGLVALPVFL

>CYP107AW6 (2515924396) *Salinispora pacifica* CNT854

VETVTGTSAPPPVPYIADPYPTLARIRANGPVSIHLSDEGVPMWVIARYR  
EVRAALADPRFGQDARRAQALADNRVAGVTLGGDIVHMLNSDPPDHTRLR  
RHVQGAFTARRVAAMRPLVERITTSLLDGLAGRKTVDLVQDLAFPLPMLV  
ICELLGFPAEERNAYRSWSTAILTHDDDPAVFATALREMTDYIAVQLRLR  
RSRPGDDLLTELLTARDAGQLTDDIVGMVFLLLLIGGHETTVNLLGTATL  
ALLRNPDQHRWLLANQHALPEAIDEFLRYESPVAMATLRFTTTPVTVDDV  
VIPAGELVLVSLGGANRDPDRFPDADRLILDRRDTGHLAFGHGLHRCLGA  
FLGKLEGEVALGALLRRHPKLALAAEVRQLQWRDTIMLRGLESPLVSLHG

>CYP245A11 (2515924480) *Salinispora pacifica* CNT854

MSSTTLPRFTLTGWTREDIVNPYPVYRRYREVAAVHRGEAGGDAPETFYV  
FSYDEVAQVLSSSCFGRGRSLDATAASVPVPADQKALRAVVENWLVMFMDP  
PRHTELRSLNRSFSFPRIVTGLRPRIARIAQELL SRLGQQVETDLVEGFA  
APLPILVIAELLGIPAERHGWLRNTAIALQEASSSRARRD TDGYARAEAA  
AQEFTEYFREQVCLRRGSTGDDLLTILANAQLRGAPVSLDAVVGTAHVLL  
TAGHETTTNSLAKAVLALQAHPAVLEELRGADRLTADSIEEFRLYDPPVQ  
AVTRWTHQD TT LGGWDPVPRGSRVVAL LGSANRDPARFPLPDALDVRRPAD  
RHLGFGGLGIHYCLGATLARAEEIGLQTLNGLPTLGYPAYVDYADDMV  
FHGPSRLILVNPGERFC

>CYP244A5 (2515924484) *Salinispora pacifica* CNT854

MSATTNAELDEAPETAMPVDPGLFDCMPDLIAAARIAPVVRIPYLG RHAW  
VVCDELVKQAL THPKMGKDITLVPEWMRQPGLMVTAQPPPEYARAMIMS  
DGENHARIRRIHAPVLSRPNTERWGEQVADKVEGF LDELSQAAAAGSGAEV  
DVVTNYTHKIPLAFISEMLGLPPVAEHRLRSITDIMLYSSDYAARREAIG  
GLFGAVEEWVRNPAGLRDGVITGLLAGSDGPGAAVTEGEVIVWTLGMIIT  
GYETTGSLISTSLYEALRRPPHERPRTDEDITAWIEETLRVHPPFPHTW  
RFPLEDIELGGYLIPKGAPVQVSIAAANRQPGEGADSFDAERRGHGHL SF  
GLGMHYCIGAPLVRLEAKIAVRGFLRRFPQARLSADTAVQWESEWMIRRM  
SFLPAVLS

>CYP105BL3 (2515925457) *Salinispora pacifica* CNT854

MSSHSAAAPDPETATPLHTLAPELTFPQFERATPFDPPEAYTELSGRCPV  
APVRMADGKPSWLITSFEGVRAALSDPRLSSDM SHPGFPNRTGKPVDDL  
KDTLGAMDGERHRYRRMLTGELTVRRAKAMRPVITQITDEALDQLAAAG  
PGADLVTHVALVVP SRVACHLVGIP LSEYELFTGMAAKLMDSTSSADQIA  
ALQDMVSYFDTLVT DREHHDRDDLGHMVRRYLATGELDREMLIRLAWTT  
MAAGQETTAHMI GLGVAALLRHPDQLELLRREP HLMPGAVDELMRYLPMI  
QFGIPRVAMDDVEVDGQTVTAGEGVVALPPLANRDP AVFERPDELDVRRN  
ARQHLSFGYGP HQCPAHALARLELEVYGRLLERFPTLRLADSDADLKVQ  
DEDIMYRVSELAVAW

>CYP208A27 (2515926031) *Salinispora pacifica* CNT854

MTVITKRGGRVPPGPPVTTAGLRLLLLALGRDRLGMLTSAATEYGDVARLPV  
GPKRLYFFNHPDHAKHVLAADNHANYAKGIGLVNARRALGDGLLTSDEGLW  
RRQRRVIQPAFLNRRLTQYAGVVQGEATRLAERLATRVDPGPPVDVLDEMT  
RLTLGVLGRTLDDAELTGFGHVGESFAAVQDQAMFELETLSAVPTWIPLR  
RQRRFRARRHLQEVVDVLAAERGQDVEGRDDVLSRLILSTRAEADPALG  
RQRLRDELVTLLLAGHETTASTLGWSLYLLDKHPQLRERVRHEATSVLGD  
RVPGYADLHQLQYTAMVVQEAIRLYPPVWILTRKARAEDEVGGYRVPAGA  
DLLICPYTLHRHPRFWEEPGRFDPERFDPARLANRPRYAYIPFGAGPRFC  
VGNNLGMLEATLVLAVALRLDLRLEGLPGRAVVPEPMLSRLVRGGLPMMVR  
RAD

>CYP107FH3 (2515926136) *Salinispora pacifica* CNT854

VPIELDEAFVQDPYAVYERLRAEGPAHRVRMPPGVPLIGGLPVWLITGYD  
AVRAALADSRLSTDLHRIDGLFAQKDPDRSHRGGFSSALASHMMHTDPPD  
HTRLRKLVSQAFTTRAIEALRPRIQQTDELIADLAGHDTVDDLDAFAFP  
LPIRVICLLLGVPVAEQENFRSWSRALVSGHSPEAAATAATEVAAYLGDL  
VERKRQATTDDVLTALVTAHDVDDRLTHTELVSTAYLLFIAGFETTLNAL  
GNGTLHLMLHRDQWTALRADRALLDNAVEEFRLRESPLKHATFRCATESL  
RIGDAEIAAGDFVLLAIASANRDPRRFPDPHTLDVRRPAAGHLAFGHGIH  
HCLGAPLARVEVRMAFDALLDAFPDLRLATDPAGLRWRNSTIIRGLDSL  
VHLNN

>CYP2054A3 (2515926140) *Salinispora pacifica* CNT854

MPISADSEQVQGRFPDPYGAHRDDPYAFLAGLVFYAPLLDAWCVTRED  
MVAVLRDDRSFSARDHNPRPAVALPDDVNQMFRTWGAGAVAVGSLDPPA  
HAKIRDVLNIGFTPARVRAFEPTMRAVATDLADRIGDAPEFDFIADFVFP  
FALEVIGRRLGVPDDYLDRCRTWSEQRIELMMAQGDADHDRLREFARGLM  
EFGEFARSLVRDRVADPRDDLISELLHDGKAGRTLTADEVAVQIPTLIFA  
GHMTCAEALGTIFYQQLRSPGGWARVVDRTIPVGDVVEEGLRFDSPLAGM  
YRTATRDVTVGGIRLTAGSRLLLLYGAAGRDSRAHACPAAFRPGDGSSGH  
LAFGHGIHFCLGAGFARAELRVAVEVLAARMPDLGLAPGRPPRFRPVFPL  
RALTELRVTRSGGGCGP

>CYP161N4 (2515926145) *Salinispora pacifica* CNT854

VNTVAQLPFTQTHVLDVAPALRLLQSRGKVHRVRTPEGVPAWLVTGHAEV  
QQLLDDDLRSRSDPGGRDGGTALLNKLLGPLADDHPRLRSLLFPQFTPER  
LEPLRAIVEKLTEQHLDELATRTPPVDLRPALAMSLPILVLCEWLGVPAE  
DKDRFSAWTQDAAGVQDPERSQRGLAELFGYCRQLVAAKRQDPGDDVISR  
LIATAGIGDTEVVALTALLLFGGYETTVARIGTGVLNLTNPQWAAVRA  
DPALVPATVDELLRRSMPNPHNGGMPRFALTGFEIDGAAIRAGDLVLLNI  
IAANHDETAFFDPDRDLVTRPTAGSLAFGYGRHSCVGAPLARMVLRVALS  
RLITRFPDLCLAVGVDGLKLRHETLVGGGLVELPVWTGPR

>CYP211B16 (2515926328) *Salinispora pacifica* CNT854

MDASEAVALLMSPGRDPYPTYERLRAHGPPVATAAGFFVVTGYAEADA  
VLRNPRFAVMDDEERDGVFPHWQDSPAMMSISQSMIRANPPDHSMRRLA  
AGVFTPRRVAALREVVAQADELIDEMIRAGRGGAPVDFLGGFAYPLPVT  
VICALLGVPAADWAQFRRWAGDLTGVLPEITPQELAVADAGATELRDYF



TELIAQRRRDPADDLTALVQTHDADGDRLSGEELLANLVLLLVAGFETT  
TNLLGNGLFVLLTHPESATALRDQPELAPSYVDELLRYDSPVQLTSRTVR  
ESVPLAGVELPAGSWLLVLLGAANRDPARFTDPARFDPGRAQSPPLSFGA  
GAHYCLGAGLARLEAQVAFPLLLRRLPELALAGEPVRRSRLTLRGYETLP  
VTVGAVAADHGTPAGAALGTP

>CYP107AY8 (2515927224) *Salinispora pacifica* CNT854

MRAEPAPIPRSGARLGQEYDQLRKTDGVHQVLLPDTSLAWLVTSPELVSR  
ALADPRLALNRKHSRGGWSGFALPPALDANLLNLDAPDHTRLRRLVGPAP  
SPQ RVAALRPRIQRVAEELADTVVATGSPVDLVTGYCTPLSVQVIADLLG  
VPEAGRDTLRAWTDMLTSYPPDRDAIRQAVVELHGYYVNLIEAKQQRPG  
DDLLSALVATEQEGDRLTRDELTSLAFLILFAGYENTANLIASTVLRLLD  
HGSLRGVRASEEIEETLRLEPPAPAAIRRFPTTEMTIGGATIPAGDTVLL  
SIAAATRGTDHSARLAFNGPHFCLGAALARVEAEEAITVLARRLP SLA  
LAVPGAPARWRPTFRTHGPAELLVTW

>CYP1197A2 (2515927587) *Salinispora pacifica* CNT854

VSLRLRLFELGADDPYDFYRHLRESGPVQWDDWMRTWLVLGYDEISALSKD  
ERLSGARIDSFYERLPTGSRSGIAPLKNALSDMMLFTEPPRH TKLRQLIR  
PGLTPRFIREMRPLVQTVVDDLLDRVLPTGRMDVIHDLSEPLSRDVIARL  
AGVDGPGTG LLENWQGLLHEFFTQSQA AIPRINALRDVFDRGAVARRAGT  
ADDMFSRMIAGQLGRAEYTDDEVFANFLLLLIDAGQATTHLIGNAVLALI  
DHPDQLQLLREHP ELGVGA AHELLRYDTSVQFTSRVALEDITIGGQHIAA  
GQSVALVLGSGNRDPRHYPNPDRLDLRRRAADHLSFGHGIHYCLGAALAL  
TEIEIAVTTLLRRTRDLRPAETGRDWLESVNFRFLQRLPVRFTAV

>CYP1226A3 (2515927769) *Salinispora pacifica* CNT854

MTRTLRTPTSAPGRLPVLGHGLHMKRRPAEFLLELQSGEPVVTIALGRRP  
AYVVDHTLTMRELLRDGDTFVRGGPMTERFRSMFGNGLGISEGEFHRRQR  
ALIQPAFHNRKVIHYTELMSRTVAGTRDSWRDQQLAVEKEMDELALTNV  
VEVIFAGDRSVDRARFMAATTTVLGGLFRRITDVTGVLTRLPTQANRDYD  
AAAEYL RATIRRVIAEYRAAGTDHGDLLSMMLFARDEDGRPAMSDQQVHD  
EVM TFFIAGSNTIANTLCWALHQIGADA EVERRLYAEVDRVLDGRAAGYA  
DVANLEYTRQVLAETLRLRTQGLFN RVTARDAELGGYLIPAGSAVLYSF  
HAVVHNPR IYEPERFDPDRWRPERARALPHGAFMPFATGVHGCIGDQFA  
WTEMIVSLASIVARWRLEPVPGHQPKVPAMTMPVDSLPM TVRLRSR

>CYP105AB27 (2515928423) *Salinispora pacifica* CNT854

MTETASITTPGTSSTTTSEPASGQVTD AEF PVERGCPFSTPVEYEQIRDH  
SPLAKVRLTTGREAWWIAGHELGRAVLADRRFSSDRRRDNFPFVSTD PET  
RKQLQDQPTSMIGMDGA EHAQARRALMG EFTVRRMAGLRPRIQQIVDQHI  
DEMLSSDERTADLVEALS LPVPSLVICELLGV PYADRDFQARS GPLIRH  
TTPTEVRLRIQEELNTYLGALIDRKVTEPTDDLLSRQIAKQRAAGTFDRT  
SLVSMAFLLLIAGHETTANMISLG VVGLLQHPDQLAMIKDDPEKTPPAVE  
ELLRYFTIADTVTARVATEDVQLGGTTINAGDGVVISGLAADHDPTVFTD  
PDRLDL ERGARHHVAFGFGPHQCIGQTLARMELQIVFDTLFRRIPTLR LA  
APLDDIPFKSDAFVYGA EKLPVAW

>CYP1005A8 (2515928547) *Salinispora pacifica* CNT854

VSAVLFRSWTKTAGTHWPPVTRVADQQGTEHLVVTEHELVRQVLT DQVTY  
RPDNALDAVTPIVPALRVLAGHRFRLPPTLANNGGVSHPAIRALVADAL  
HPAKVAAQR PWLTKLVAERVA AIGATLD SGSSADLHAELSADLPLLVLAR

LVELPDAPVSAVKQFARAALFWAPLDADRQLALADKVGRFHQVLRFA  
DTGGGLAAALRATGHPPDVLVGALFFLLVAGQETTSQFLTLHRLAGEP  
TVRAALRDGSVSVANVVEEGLRLEPPIVWRRVAVDSTLGGTAVPAGTS  
MLLWLARAGRDPAIVPAPDEFPRPGQRGSRRHLAFGAGAHRCGLGDQLARME  
AAVVVEQATPLLDGTSVVRAPWYPDNLTFRMPDAFVIRR

>CYP163B1 (2562097046) *Salinispora tropica* CNY681

VTAADTGRVSGESQTPAHTVDLADPATFANHDLTGFWQQLRDEEPIHWN  
PPTAGRRGFVVSRADILDVYRDDVTFTSERGNVLVTLLAGGDAGAGRM  
LAVTDGPRHAELRKLLLRALGPRVLAPVCAAVRTNTRQMIREAVTKGED  
FASDIASRIPMTTISNLLGVPDADRAFLLSLTKTALSADDESISETESAM  
ARNEILLYFQDLMEFRRDHPGEDVVSMLVNSSIDGAPLSDDDIVLNCYSL  
IIGGETSRLTMIDSVNTLAAHPQQWRRLKDGQCEIDKAVDEVLRWASPS  
MHFGRVAARDTILHGVRIRADDIVTLWHASGNRDERVFHRPEVFDLGRTP  
NRHLSFGHGPHYCIGSYLAKVEISELLIALRDLTSGFETTGEPRIRSNL  
LTGFATMPVRFPDRAGLARDALDG

>CYP107AW1 (2562097685) *Salinispora tropica* CNY681

MESVTSTSAPPPVPYIADPYPALARIRANGPVSIHLSDEGIPMWVIARYR  
NVRAALADPRFGQDARRAQTADNRVAGVTLLGGDVIHMLNSDPPDHTRLR  
HLVQGAFTARRVAAMRPLVERITTSLLDGVGGRQTVDLVQDFAFPLPLV  
ICELLGFPAEERDAYRSWSTAILTHNDDPAAFATALRDMTDYIEVQLRHR  
RARPGEDLLTELLAARDAGQLTDDIVGMVFLLLIIGGHETTNNLLGTATL  
ALVRNPDQHRWLLANPHALSEAIDEFLRYESPVAMATLRFTTAPVTVDDV  
VIPAGELVLVSLGGANRDPDRFPDADRLILDRRDTGHLAFGHGLHRCLGA  
FLGKLEGEVALGALLGRYPGLTLAAEVRQLRWRDTIMLRGLESPLVSLHG

>CYP154M1 (2562097748) *Salinispora tropica* CNY681

MRRRCPVVIDPAGTDIHAEGARIRANGSVSQVELPGGVLAWSVTGQQVAR  
KVLSDQRFKSKDPRKHWDYLEGRIGQDFPLIGWVMDNLTAYGSDHSRL  
RKPCANAFTPRRVEALRPAVERAAVELLGEATVSPTESVDLKARYAHPL  
PSRVICDLFGVPEEDREEMLRGGEVNVDTRVSAEEAAANVERWHQQMLDF  
IEEKRRNPGPDLTSDLIAAQQAEGRSLTDSEMVGTLHIMLATGTEPVKNL  
IGNAVFALLTHPEQLDLVRSRAGWDDVIQETLRMQAPVAHLPPFRFAVED  
VDIDGVTIRRGDPLLVNFAAIGRDPDVHGDAAEFDI TRADKEHLSFGHG  
VYRCIGQPLALRAEIALRMLFQRFPNLVLAVPPEEVTPQPTFIMNGLDT  
LPVLLKGRA

>CYP208A4 (2562097776) *Salinispora tropica* CNY681

VTVAAAGRTFSGPTGAALLRSLWQLGQDRGLMTSAARYGDVRLGVGSR  
SLYFFNHPDHAKHVLADNSGNYTKGLGLVHARRALGDGLLTSEGELWREQ  
RRVIQPVFQAKRVAGQAHAAVEADRLIARLRARRGRGPVNLTDEFTALT  
LGVLGRITLLDANLDAFTTVGAAFEEMQNQAMFEMASMSMVPWVPLPQQ  
RFRRARRELERIVGRVLADRTARGEETGADDALSRLIASTRDEPDGVAR  
RRMRDELVTLLLAGHETTASTLGWTFHLINQDPRVRVRLREEAIDVLGGR  
LPEYADLARLTYTKMVVSEAMRLYPVWMLSRLARDADVVDGYVPVPRAD  
VLICPYTLHRHPAFWPEPERFDPERFDPEVTTDRPRYAYVPFGAGPRFCV  
GNHLGLMEAVFVAMVSREFDLVAPVGQPVVAEPMLSLRVRGGLSMTVEP  
VS

>CYP125A15 (2562097855) *Salinispora tropica* CNY681

MTEPRIPVGFDFTDPAVLERRVPREEFAELRRTAPVWWNVQPRGSAGFDD

DGYWVVTRYADVMASRSDSTYSTRENTAIARFQPGTTRADLEMQRVIML  
NVDPPPEHTKLRAIVSRGFTPRAINALRGSLAERAERIVRDAAVRGTGDFV  
ADVACELPLQAI AELIGVPQHRRKVFWDWSNQLIGYDDPAYGVDPLTAAA  
ELLAYAMEMANERQLNPSDDLVTCLVNAQIDGHELTDEFGFFVMLLAVA  
GNETTRNAITHGMLAFLEHPEQWELFKAERPRSAVEEIIIRWATPVNVFQR  
TALVDTTLGGQAI SAGQRVALFYGSANFDES VFEEPERFDITRSPNPHLG  
FGGSGAHFCLGANLARLEIELIFHSIADHMPDIRKVAEPRRLRSGWINGI  
REMPVRYR

>CYP211C1 (2562097988) *Salinispora tropica* CNY681

VLDVEGLLTRLYSEQGRQDPYPVYADLHAQGAIAALAPRPEGQRVA AVAV  
GYDLVGAVLRDPEWSKQPPPGWMEQEILRTLQSSMMFINPPDHGRMRKVF  
AGTFTPRRLGTLEPVINRVADELDRMADAGPGEVDFVAEFAYPLPARVM  
AEFIGIPATELAWYRDRVDRIDAFLDVAGKTPERLAAANAAAAELRVFYA  
DLLARRRRTPGEDLISGLVEAVDAGGVQLTEDELINNLIVLFNASFVTTV  
YMLSNGLPVLLHEHPEVAAALADDPELTAGAIDEILRLQTPVHLLARAAPR  
DTVLGGVPI PQGQNVLLLI AAANRDP AHFPDPDRFDPRRPGPPSLAFGLG  
LHYCLGAAVSRLEGRALPRLLSRFPRLRIMEQPVYSGSLFLRGIDKLSV  
SPGGRMHP

>CYP105AB2 (2562098173) *Salinispora tropica* CNY681

MTETASIATTRTASGQLTDAEFFVQRCFPFTAPTEYEQIREESSIAKVRL  
KNGGEAWWIAGHELGRSVLADRRFSSDRRRDNFFVSTDPETRAQLQSQP  
TSMLGMDGAEHAQPRALMGEGFTVRRMAGLRPRIQQIVDQHIDEMLATPQ  
RSVDLVEALSLPVPSLVICELLGVADHDFFQGLTGPLLRRHTTPEVRL  
RIQEELNTYLGTLIDHKLTDPTDDLLSRQIAKHRDNGTFDRASMVSLAFL  
LLVAGHETTANMISLGVVGLLQHPDQLV I IKDDPDKTPLAVEELLRYFTI  
ADSVTARVATEDVQLGDTTINAGDGVVISGLAADRDPTVFAEPDRDLER  
GARHHVAFGFGPHQCIGQTLARMELRIVFDTLFHRIPTLRLAAPLDDIPF  
KSDAFVYGIEELPVAW

>CYP211B1 (2562098683) *Salinispora tropica* CNY681

MDASEAVALLMSPGLRIDPYPTYERLRAHGPPVQTAAGFFVVTGYTEADT  
VLRNARLAFEVMDDELRDDVFPHWQDSPAMKSIARSMIRANPPNHGRMR  
LAAGFTPRRIAALREVVTQAQADELADEMIRAGRDGAPVDFMGSFAYPLP  
VAVICALLGVPAADWARFRGWASDLTAVLEPEITPQELTVADAGASELRD  
YFTELIAQRRRAPADDLTALVQTHDADGDRLSGEELLANLVLLLVAGFE  
TTTNLLGNGLVLLAHPDSATALRDQPELAPGHVDELLRYDSPVQLTTRT  
VRESVLLAGVELPAGSWVLVLLGAANRDPERFTDPTRFDPGRAQSPPLSF  
GAGAHYCLGAGLARLEAQVAFPLLLRRLPELALAGEPTRRNRLTLRGYET  
LPVTVSAIAADHGTPAGVARGTP

>CYP1005A1 (2562099000) *Salinispora tropica* CNY681

VSAVLFRSWTKTAGTHWPAITRVADQQGTEHLVVTQHALVRQVLT DQLTY  
RPDNALDAVTPI PVAALRVLAGHRFRLPPTLANNGGVSHPAIRALVADAL  
HPAKVAAQRPWLTGLVAERVAAIRRTLDSGGSTD LHAELNADLPLLVLAR  
LVELPDAPVSAVKQFARAALFWAPLDADRQLALADEVGRFHQVLRIFA  
DTGGGLAAALRATGHPPDVLVGALFFLLVAGQETTSQFLTLHRLADEP  
TVRAALRADSVSVADVVEEGLRLEPPIVTVRRVA AVDSTLGGSTVAAGTS  
VLLWLARAGRDP AVVPAPDEF R PGQRGSRRLAFA GAGAHRC LGDQLARME  
AAVVVEQVTPLLDGVTVVRPPWYPDNLTFRMPDAFVVR

>CYP107AX1 (2562099824) *Salinispora tropica* CNY681

MTSRPTAVFDQCLLRDPHSRYNALRDQAPVHHVLTDPGAPAWLVTRYNDV  
RAAFTDPRLSVDKRFSGTDGEHGSSLPPELDAHLLNRDPDPDHTRLRLRLAA  
AACTPRRVADLHPAVERIVSTLLDGLAGHDRAELIGSLASPLPLQVMHEL  
LGLPTQANIDFRTWTNTLLSADANQPAQSRAAMANMRRFLIEQLAHKRAQ  
PGDDLLTGLLAAREDDRLTDELIVAMVFLLMFAGYDNTAALIGTVTHAL  
LTNAELHEAVRGGSLALDELIDEVLRWNPAFPLAVRRFAREPITIAGQTI  
PAGDRIWLCLASANRDPAQFTQPDELGIIGLRRSHLSFGHGIHYCLGAPL  
ARLQTTIAVTSLNRFPEMRLAVPAHDIRWRESFRLRGLIALPVYL

>CYP113E1 (2562100020) *Salinispora tropica* CNY681

MMATVPRLTFADGGVSVLPWFRQMRDDQPVWYDQGTGSWNVFRYADIAQI  
LTDPATFSSDPGRMTPELVEEAEGSLVAVDPPRHGRLRALISTAFTPRL  
VEQLAPRVRSIAERLLDRTFVDRGPEGEFDAIGDVAYLLPVYVIGELLGL  
PETDREYLVRTADEFYAISADDPFDGTYMASMQSTLDGLGTYMLDQAERR  
RARPGDDLMSALAHAEIDGEQLNDREIRNFAVLLLTAGHITTTALLGNTL  
LALGERRDVMLRWRHGQVDTADVLEEVLRHRTPFTEVYRFTTTEVTIGNQ  
VVPGDQLRLRWIASGNRDERQFADPDTFVLGRDSRHLGFGGLGIHYCLGAS  
LARMESVVLVLAERTTTLAPAVQGLSYDAPGIFCLRSLPVSYRRS

>CYP125G1 (2562100587) *Salinispora tropica* CNY681

MSTEVVSTGNRADIAPATYAAGVPYAEFARLRRDKPVSWSVPEAALWRRS  
GEGRILSQGPFWAVTTHEGVVAASRQPEVFSSGRQGAFLADPRTTADLE  
QARQLLVNMDAPQHARVRKLVTAFTTPRAIRALGDSVTAHARNLVERAVR  
QEECDVVADLAAELPLLVLADLLGLPREDRHLLYQWSNNLVGFDDPEYGG  
GDVEAYRKTTFFEAQYALSVAGERRRAPREDLMTLLATSEVDGRRLTDRE  
FCNFWLLLVVAGNETTRHLITGSLVLAALVDNPMQRERLVADDTLLPSAVDE  
LLRWVSPIMQFRRTAIVDTELCTPIAAGDKVVLWYTSANRDAAVFEAPD  
ELRLHRNPNPHLSFGMGPHFCLGAHLARLEARTMLRELAPHLRSRFLTGP  
VVRLESNFVNGVKSPLPGSFTGQ

>CYP1004A1 (2562100626) *Salinispora tropica* CNY681

MRANTARPHLSAAFLATKDDPYPAYAELRARGPLTRAELGQWLVTGHGAV  
SALLRDGRLESMPAEYTRLTLGDSPGVDFLHRIVLTRTPPEHTRLRRFI  
GRALGTPVVRRLHDRIAAATDALLEPALDRGRLDVVTTELAVPLPVGVVCD  
LIGIPTGDRPAVLTRVTALAKVFDAANLSPADLADINTALPWLHDYFGDL  
LAVRRAGSGGPTLTEMYYEESASDRLAVADFVDNMLFLFHAGFETTMGLV  
SNGVAALLNNPEQLGRRLRADPALVPSAVEEFLRYDAPIQN VIRVARKPVE  
VAGQKIRAGRTVLLLLGAANRDEEVFADAERLDVGRDPNPHLGFGGGLHH  
CVGTALARLMAVVVFERLVDVTVLGPAAPAVRRRRHASLRSYDHLPLAVA  
AR

>CYP1004B1 (2562100630) *Salinispora tropica* CNY681

MTTSALAPRFDALDPNVVEDPYPEYARLRAAGPLCRLGPGSWGVTFRADV  
TNLQHDPRLGSEFPAGYHEISVGDGPASAFFQRMVLYRDPDPDHIRLRLRM  
SGAFTPAVVRRLRSHIEDLVDELLAPALAAGRMDLVPELAYPLPVRVVCR  
LMGIPPESTEDVRHHATNIGRAFTAVVPEQARTEADEAVSWLREHLGALL  
EQRRSHRGDDLLSRLLDAAESGDNLSADEIVDNTVFSFFAGFETTVHMIT  
TGTAALLAHPDQLARLRADPSLVTTAVDEFWRWDAPIQGTARYVREPIEI  
GGRTIRRGVVLVLMIGSANHDERRFAQPDRLDVGRQDNPHVAFGGGAHLC  
LGAFLARMEGAVVFDRLARLAVLEPDGPTVREPNTPFRAVASVPVRIGDR

>CYP107AY1 (2562100665) *Salinispora tropica* CNY681

MRAELAPIPRSGARLGQEYDQLRNAGDVHQVLLPDSSSLAWLVTNPKLVSR  
ALTDPRALNRRHSRGSWSGFALPPALDANLLNLDAPDHTRLRRLVGPAPF  
SPQRVSALRPRIIRRTAEHLLDTLVATSGPVDLVTGYCTPLSVQVIADLMG  
VPEAGRDLRTWTDTMLTSYPPDRDAIRQAVVELHGYVVDLIDTKRQQPG  
DDLLSALVTIEQDGDRLTRDELTSLAFLILFAGYENTANLIASVLRLLD  
HGGLRGVQLPEAIEETLRLEPPAPAAVRRFPTEEMTIGGATIPAGDIVLL  
SIAAATRGTAGNAARLAFGNPHFCLGAALARVEAEEALTVLARRLPDLA  
LALPVAQVRWRPTFRTHGPAELLVTW

>CYP107E3 (2562101138) *Salinispora tropica* CNY681

VTIDQEIRKYPFCESPGIGIDPTYGLLRSTEPLARVQLPYGEVSWLATRY  
EDVKTVLTDPRFSRAAAQGKDQPRTREEMTYEGIIGLDPPDHTRLRKLKAG  
KALTARRVNAIRADAQRIANEYVDEMIAGSPGDLVELFALPYPVTVICE  
LLGVPFEDRAQFRIWTEGLTSTSEQLMVYAEQLFGYMGKLVAQRREEPTD  
DLLGALVKARDEGDRLTEQELLSIAGVGLLLTGVEVTVSTHIPNFVYALLT  
HPELMAQLRADRSVLPAAVEELLRMIPLNPAAMFPRYAVEDVTLSGITVR  
AGEPVLVSLPGANRDPEVFENPETFDFTREQNPHVAFGHGPHHCLGAQLA  
RMELQVALHTVLDRFPDLSLADGDEGVSWKSGLLVRGPSRLLVAW

>CYP162A8 (2518088078) *Salinispora pacifica* DSM 45543

MISPDLSDPFTFYQNGDPLPVWAE LRREHPVYDNRRADGTRIWA VMTHKLC  
TDMLTNPKVFSSANGMRLDSNPRVLARAAGKMLNVTDP PQHDKIRKLVSS  
AFTPTTIRRLLEANMRATAGRAIDTAIADGGCELTRLAHKLPVSVICDLLG  
VPEQDWDFMAERTRFAWGSTAADDREEVEKVAHA TEIMAYFLDLAADRRK  
RPMEDLV SALVHGEVDGRALTD EDVLYNCDALLSGGNETTRHATVGGFLA  
FVMNPDEWSAIRQNRDLLPSAIQEIVRYTSPVMHSLRTATRDVEFGGINI  
RAGEYVVAWLPSANRDEQLFDDPDRFNIRRS PNRHLGFIQGNHYCIGAGL  
AAMELRVMFDELLNRVSEVRLAGPARRLR SNLLWGFDSL PVTTFHVAGAR

>CYP161T2P (2518088127) *Salinispora pacifica* DSM 45543

MARCWAGVPYANWEQFRRWSDDAADMYDQERSVGGYQALRDYIAELAQVR  
LRVSGTDLISDLMESHRTEPEGFTLNQVVELGLTLLFAGHETT VTAIDNG  
AVLPATHPEQARLAGDPSLLDAAVEEILRGSVPRMNF FARPD DTD PAGA  
PPRWANTDLVIGDVTVRAGELVLLGLAHANADERFFAESARFDVGRV PNR  
HLTFGNPHFCAGAPLARLEL\*ELSVALLERFPGLRLAVPAERLEPRANL  
LTGGMTRVPVTW

>CYP105AB29 (2518088779) *Salinispora pacifica* DSM 45543

MTETASITTPGTSSTTTSGPASGQVTD AEFPVERGCPFSTPVEYEQIRDH  
SPLAKVRLTTGREAWWIAGHELGRAVLADRRFSSDRRDNFPFVSTD PET  
RKQLQDQPTSMIGMDGAEHAQARRALMG EFTVRRMAGLRPRIQQIVDQHI  
DEMLSSEQRSADLVEALS LPVPSLVICELLGV PYADHDFQAHSGPLIRH  
TTPSEVRLRIQEELNTYL GALIDRKVTDPTD DLSRQIAKHHAAGTFNRT  
SLVSM AFLLLIAGHETTANMISLG VVGLLQHPDQLAMIKEDPEKTPPAVE  
ELLRYFTIADTVTARVATEDVQLGDTTINAGDGVVISGLAADHDPTVFTD  
PDRIDLERGARRHVAFGFGPHQCIGQTLARLELQIVFDTLFRRIPALRLA  
APLDDIPFKSDAFVYGA EKLPVAW

>CYP107CL2 (2518088818) *Salinispora pacifica* DSM 45543

MHDPYPVYVGM RDSAPVRLSDANAGR TW FVP RYHDVIDVLRDDRFSAALK  
APAFINQFPPEQRVQFQPFNQSIAGWVVLQDPPAHRQLRQLMNKGFT RHL  
VAALRPKVTEIATGLVD T MATRRSGDFMTDFAQPFPAAVIATMFGVPAAD  
LSAFISWSDDIVLFADSLRPTVEVARAAQNGLLSMTEFFRQLLPQRRADP  
GDDVISLLVSVRDNGEQLTDEQVLNCAQLIVAGHETTRNLVANGWLWTL  
SHPDQLAKLWADPSLMTSAIREMMRFESPLQFVRRVARDDFDYLGVR IQA  
QDGVVTMLGSANRDPAFFTEPDRFDITRNPTGHVALSYGPHICLGAALAE  
METEVALGLLLERFPDLRAVDEQPERVMNPMLRGGGGDV RAGRRVRRQRH  
RAEPGRVNDPVVVVSATDEVLRDPAAGPHLLTGQERARLGSFGSESARRD  
FIAAHLVLRLCAARLLGTGPAQVSFGQFCPGCHATR HGRPLLTD RPD IHL  
STSHTAGVAAAAGHAPVGV D VERHGRQ RSAALMRRVLAPAEFALVTEHP  
DPRHAF L P YREREPGGLDSLGDGGGAVTSPEPSGGASGGAVRDHRAQPGD  
ERQH GATDRQ RGERDPAEVSHHRRVHQHIQRFGGEHHEGRQGERGNSAR

>CYP1005A8 (2518089058) *Salinispora pacifica* DSM 45543

MSAVLFRSWTKTVGTHWPAVTRVADQQGTEHLVVTEHELVRQVLTDQVTY  
RPDNALDAVTPIPV PALRVLAGHRFRLPPTLANNGGVSHPAIRALVADAL  
HPAKVAAQR PWLTKLVAERVA AIGATLDSGGATDLHAELSADLPLLVLAR  
LVELPDAPVSAVKQFARAALALFWAPLDADRQLALADEVGRFHQVLREFA  
DTGGGLAAALRATGHPPDVLVGALFFLLVAGQETTSQFLTLLHRLAGEP  
TVRAALRDGGVSVANVVEEGLRLEPPIV TWRRVAAVDSTLGGTAVPAGTN  
VLLWLARAGRDPAIVPAPDEF R PGQRGSRRHLAFGAGAHRC LGDQLARME  
AAVVVEQAAPLLDGISVVRAPWYPDNL TFRMPDAFVIRR

>CYP211B19 (2518089405) *Salinispora pacifica* DSM 45543

MDASEAVALLMSPFGRDPYPTYERLRAHGPPVVATAAGFVVTGYTEADTV  
LRNPRFGVMDDEERDGVFPHWQDSPAMMSISQSMIRANPPDHSRMRRLAA  
GVFTPRRVAALREVVAQADELIDELIRAGRGGAPVD FLGSFAYPLPVTV  
ICALLGVPAADWAQFRRWASELTAVLEPEITPQELAVADAGATELRDYFT  
ELIAQRRRDPADDLT TALVQAHDADGDRLSGEELLANLVLLL VAGFETTT  
NLLGNGLFVLLTHPDSATALRGQPELAPSYVEELLRYDSPVQLTSRTVRE  
SVTLGGVELPAGSWLLVLLGAANRDPARFTD PARFDPGRAQSPPLSFGAG  
AHYCLGAGLARLEAQVAFPLLLRRLPELSLAGEPVRRSRLTLRGYETLPV  
TVGAVAADHGTPAGAARGTP

>CYP244A5 (2518089754) *Salinispora pacifica* DSM 45543

MSATTNAELGEAPETSMPIDPGLFDCMPDLIAAARIAPVVRIPYLGRHAW  
VVCDRELVKQALTHPKMGKDIALVPEWMRQPGLMVTAQPPPEYARAMIMS  
DGENHARIRRIHAPVLSRPNTERWGEQVADKVEGF LDELSKAAAGSNAEV  
DVVTNYTHKIPLAFISEMLGLPPAAEHRLRSITDIMLYSSDYAARREAIG  
GLFGAVEEWVRNPDGLRDGVITGLLAGSDGPGA AVTEGEVIVWTLGMIIT  
GYETTGLISTSLYEALRRPPHERPRTDEDITAWIEETLRVHPPFPHPPTW  
RFPLEDIELGGYLIPKGAPVQVSIAAANRQPGEGADSFDAERRGHGHL SF  
GLGMHYCIGAPLVRLEAKIAVRGFLRRFPQARLSADTAVQWESEWMIRRM  
SSLPAVLS

>CYP245A11 (2518089758) *Salinispora pacifica* DSM 45543

MSSTTLPRFTLTGWNREDIVNPYPVYRRYREVA AVHRGEAGGDAPETFYV  
FSYDQVAQVLSSSCFGRGRSLDATAASVPVPADQKALRAVVENWL VFMDP  
PRHTELRSLLNRSFSPRIVTGLRPRIARIAQELLSRLGRQVETDLVEGFA

APLPILVIAELLGIPAGRHGWLRTNALALQEASSSRAGRDTAGYARAEAA  
AQEFTEYFREQVHLRRGSTGDDLLTILANAQLRGVPVSLDAVVGTAVHLL  
TAGHETTTNSLAKAVLALQAHPAVLEELRGADGLTADSIEEFLRYDPPVQ  
AVTRWTHQDTTLGGWEVPRGSRVVALLG SANRDPARFPLPDALDVHRRPAD  
RHLGFGGLGIHYCLGATLARAELEIGLQTLNGLPTLGYPAQYVDYADDMV  
FHGPSRLILVNPGERFCQ

>CYP107AW6 (2518089845) *Salinispora pacifica* DSM 45543

METVTGTSAPPPVPYIADPYPTLARIRANGPVSIHLSDEGVPMWVIARYR  
EVRAALADPRFGQDARRAQALADNRVAGVTLGGDIVHMLNSDPPDHTRLR  
RHVQGAFTARRVAAMRPLVERITTSLLDGLAGRKSVDLVQDLAFPLPMLV  
ICELLGFPAEERNAYRSWSTAILTHDDDDPAVFATALREMTDYIAVQLRLR  
RSRPGDDLLTELLAARDAGQLTDDEIVGMVFLLLIGGHETTVNLLGTATL  
ALLRNPQHRWLLANGHALPEAIDEFLRYESPVAMATLRFTTTPVTVDDV  
VIPAGELVLVSLGGANRDPDRFPDADRLILDRRDTGHLLAFGHGLHRCLGA  
FLGKLEGEVALGALLRRHPKLALATEVRQLQWRDTIMLRGLESPLVSLHG

>CYP107AX9 (2518089858) *Salinispora pacifica* DSM 45543

MTAQPAFVFDQRLLRDPHRRYNALRDQAPVHRVRTPDGAPAWLVTRYDDV  
RAAFIDPRLSVDKRFSGTDGEHGSSLPPELDAHLLNRDPPDHTRLRLRLAA  
AAFTPRRVADLRPAVEKTVSTLLDGLAGNDHAELIGSLASPLPLQVMHEL  
LGLPTQTSVDFRTWTNTLLSADANQPAQSRSAMANMRRFLIEQVAHKRAQ  
PGDDLLTGLLCVREDDDDGLTDDELVAMLFLLMFAGYDNTAALIGNVIHAL  
LTDVELAEAVRTGSLAVDELVDGVLRWNPFSFPLAVRRFAREPITIAQGTI  
PAGDRIWLCLASANRDPAHFTEPDEIGIADMRRPHLSFGHGIHYCLGAPL  
ARLQTTVAVAAILFDRFPGIRLAVPVQDIQWRESFRLRGLVALPVSL

>CYP208A21 (2518089872) *Salinispora pacifica* DSM 45543

MTTTSIDRRRPPGPPRAAALSMLLTMSRDRLGMMTAAARAYGDAAWLPVG  
HKALYFFNHPDYAKHVLTDNSDNYTKGIGLVHARRALGDGLLTSEGELWR  
EQRRVIRPSFRSGRAPDQASVIAEEVASLVERLRARAGGPPVNVVTEFTG  
LTLGVLGRTLLDVDLTALATVGDFAAAVQDQAMFELVTL SAVPTWIPLTR  
QRRFRARRAELEIRIVDDLVARRGDVSGRDDVLSRLILSTGAEPDARVRQ  
RLRDELVTLLLAGHETTASTLGWTLYLIDGHPPVRELLAEAVEVLGDRL  
PAYRDLPLDRFTTMVVQEAMRLYPPVWLLPRRSRRADRVGPYRVPAGSDV  
VVSPYTMHRHPGFWEPEPDRFDPLRFDPRNAADRPRYAYLPFGAGPRVCVG  
SNLGMMEAVIAVAMLCRELRLVRVPTHAAVPEPMLSLRIRGGLPMSVHLT  
D

>CYP154M16 (2518089884) *Salinispora pacifica* DSM 45543

MPDRCPVLDPGRDIHAEADRLRAQAPAVKVELPGGVHAWTSITSYDVVKR  
LLLDNRNVTKNARNHWPKFINDEIPPDWEMISWVAMDNMVTAYGKHLVRLR  
RLIAKAFTAQRVETVRPQVEKLVDELDDGLAAETGEVVDLREKFCYPLPA  
LLIAELIGMTEQQRAQTAKAMDLMVDTTVSPDQAQAILTGWRTAMDELIA  
AKRREP GKDIASDLIAARDDENGGLTDSELTDITIFAILGAGSETTINFL  
DNAVTALVTHPGQLELVRSGRAGWDDVIDEVLRVQCPLASPLRYAVTDI  
ELDGVTIPQGDPIILINYAAAGRDPALHGDTAGEFDVFRENKEHVSFGHGP  
HYCLGAGIARLVATIGLSRLFERFPDLRLAVPAEELQPLPTFIMNGHRAL  
PVRLVPAPAAATAV

>CYP211C6 (2518090136) *Salinispora pacifica* DSM 45543

MPDIEGLLTRLYSAQGRQDPYPVYADLHAQAAIAALEPRPKRQRVAHAV

GYDLVA AVL RDPEWFKQPPPDWRDQEILRILQSSMMFINPPDHGRMRHVF  
AGTFTPRRLGALEPVINRVTD ELLDRMADAGPGEVDFVAEFAYPLPARVM  
AEFIGIPATELAWYRERVDRVDAFLDVAGKTPERLAAANAAGAE LRSFYR  
ELLAHRRRTPEGEDLISGLVEAVDAGGVELTEDELISNLIVLFNASFVTTV  
YLLSNGLPVLLAHPEVAAAALASSPELAAGAVDEILRLQTPVHLLARAAPR  
DMVLGGVSI PQGQSVLLLLIAAANRDP AHFPDPDRFDPRRSSPPSLAFGLG  
LHYCLGAAVSRLEGR LALPRLLSRFPRLRILEQPVYSGSLFLRGIDKLSV  
SPGGREHP

>CYP125A66 (2518090267) *Salinispora pacifica* DSM 45543

MTEPRIPVGFDFTDPAVLERRVPREEFAELRR TAPVWWNAQPKGSAGFDD  
DGYWVVTRYADVMASRDSETYSTRENTAIARFQPGTTQADREMQRVIMI  
NVDPPEHTKLRAIVSRGFTPRAINALRGSLGERAERIVRDAAGRGTGDFV  
TDVACELPLQAI AELIGVPQHRRKVFDWSNQLIGYDDPAYGVDPLAASA  
ELLAYAMEMAHERQRNPSDDLVTQLVNAQIDGEHLTADEF GFFVMLLAVA  
GNETTRNAITHGMLAFLENPEQWELFKAERPRSAVEEII RWATPVNVFQR  
TALVDTTLAGQAI SAGQRVALFYGSANFDES VFEEPERFDITRSPNPHLG  
FGGSGVHFCLGANLARLEIELIFNSIADHMPDIRKVADPQRLRSGWINGI  
REL PVR YH

>CYP208A26 (2518090359) *Salinispora pacifica* DSM 45543

MTVIADRGGRVPPGPPV TAGLRLLLALGRDRLGMLTSAATEFGDVARLPV  
GPKRLYFFNHPDHAKHVLADNHANYAKGIGLVHARRALGDGLLTSGGELW  
RKQRVVIQPAFLNRRLAQYAGVVGQEATRLAERLATRV DGPVDVLDEMT  
RLTLGVLGRITLLDAELTGFGHGVGESFAAVQDQAMFELETLSAVPTWIPLR  
RQRRFRARRHLQEVVDVLA AERGQNV EGRDDVLSRLILSTRAEADAALG  
RQRLRDELVTLLLAGHETTASTLGWSLYLLDQHPQLRERVRHEATSVLGD  
RVPGYADLHQLYTAMVVQEAIRLYPPVWILTRKARAEDEVGGYRVPAGA  
DLLICPYTLHRHPRFWEEPGRFDPERFDPARLTNRPRYAYIPFGAGPRFC  
VGNNLGMLEATLVLA VLLRDLRLEGLPGRAVVPEPMLS LRVRGGGLPMMVR  
RAD

>CYP105BL3 (2518090791) *Salinispora pacifica* DSM 45543

MSSHSAAAPGPETATPLHTLAPELTFPQFERATPFDPPEAYTELSGRCPV  
APVRMADGKPSWLITSFEGVRAALSDPRLSSDMSHPGFPNRTGKPVDDL  
KDTLGAMDGERHRYRRLTGELTVRRAKAMRPVITQITDEALDQLAAAG  
PGADLVTHVALVVP SRVACHLVGIPLSEYELFTGMAAKLMDSTSNADQIA  
ALQDMVSYFDTLVTDREHHRDRLDLGHMVRRYLATGELDREMLIRLAWTT  
MAAGQETTAHMI GLGVAALLRHGPGQLELLRREPHLMPGAVDELMRYLPMI  
QFGIPRVAMDDVEVDGQTVTAGEGVVALPPLANRDP AVFERPDEL DVRN  
ARQHLSFGYGPHQCPAHALARLELEVYGRLLERFPTLRLADSDADLKVQ  
DEDIMYSVSELAVAW

>CYP163B20 (2518090824) *Salinispora pacifica* DSM 45543

MTATEAKYVGQVGSRNAASTIDLADPATFAGHDLTNFWQRLRDEEPIYWN  
PPTGGRRGFVWLSRHADILEVYRDDMTFTSERGNVLVTLLAGGDAGAGRM  
LAVTDGPRHAELRKLLLRALGPRVLGPVCRAVRANTRQMIGAAAANGECD  
FATDIASRIPMITISNLLGVPEADRASLLKMTKTALSADDESISD TDSEM  
ARNEILLYFQDFVEFRKNPGE DVVSM LVNSSIDGVPLSDDDIVLNCYSL  
IIGGDETSRLTMIDSINTLAANPGQWRRLKEGRCDIDKAVDEVLRWASPS  
MHFGRTAVRETVIHGERIQVDDIVTLWGASGNRDERAFKRPEVFDLDRAP  
NRHLSFGHGPHYICIGSYLAKVEISELLIALRDLILGFEVIGAPQIRSNL  
LSGFSTMPVRFDADRTGLASEAREG



>CYP107CT3 (2518091855) *Salinispora pacifica* DSM 45543

MTGASGDRGTGQCPIALDHDIFYADPHPAYRVIKENGKNKPTPIVLKTGMAYL  
PPGLEAWLVTAYEDVEFVLRDPRFRKSID EAMPLFAAQSGGTAAARGSL  
YNNMANNDPPVHTRLRKPLNAMFTSR SVAGRRDVVRSAALETLEKVAGSQ  
TFDLVKDFAFFFSISVISRTLGVPDADRGTFHGWVQTITGDAPPEILRRD  
AGLMVEYLRGLIRGRRESAGNGTDDVLTLLATSLAEDEAVAQAYALLAAG  
YETTANLIVTGFLTAAHPEQLRRLWSDPGLVPDAVEEMLRHQSPFNLSL  
YRYVTEPVELNGVRI PRGAIVFLAFAAANRDECRFTEPD SFDITQPHRDH  
LAFGGGIHNCIGKHLARMEAQVAFETLIERCPGLAVHTPDEEFDWKASPT  
FRGLRTLVRVGP GPAPGGWEREQ

>CYP107AY7 (2518092421) *Salinispora pacifica* DSM 45543

MRAEPAPI PRSGARLGQEYDQLRKTDGVHQVLLPDTSLAWLVTSP ELVSR  
ALADPRLALNRKHSRGGS GFALPPALDANLLNLDAPDHTRLRLRVGPAF  
SPQ RVAALRPRIERTAEELVDTVVATGSPVDLVTGYCTPLSVQVIADLLG  
VPEAGRTDLRAWTD TMLTSYPPDRDAIRQAVVELHGYVVN LIEAKQQRPG  
DDL LSALVATEQEGDRLTRDELTS LAFLILFAGYENTANLIAS TVLRLLD  
HGSLRGVRASEAIEETLRLEPPAPAAIRRFPIEETTIGGATIPAGDTVLL  
SIAAATRGTDGNSARLA FGNGPHFCLGAALARVEAEEAITVLARRLP SLA  
LAVPGAPVRWRPTFRTHGPAELLVTW

>CYP107Q4 (2518491485) *Salinispora arenicola* CNY260

MTTTAETS AETIDLFSPEVVADPF GWYARLREETGPTTGT LNIGTMMGGP  
EMWLVTTRYEDVRQVLT DPRFLTNP PADSPLEDIRAGVFKRLDFPPDLIPW  
MANLLNVSDGEDHTRLRKLVS YALTAHRIGKLRPRVEKITADLLDKLAED  
GKDGSPVDLVEEYCYPLPVT VICELVGIDEPRPHWRAWGDSMATMNGER  
IPTTLVKCIELARELIAKRRAEPQDDLVTALVQAQAE DQNRVSDDEIIGI  
LFSLVTAGHQTTTYLIGNSVILLLENPDQLARLKENPSMWPQAVRELQRL  
GPIQFAQPRFPSEDIELGGVTIPRGAPVAPLLLAANTDPRRFPDPNKLI I  
DRLAVGSEHGLGFGKGIHRCLGQH LAYQEA E VALQGLFTRFPDLSLAVPR  
EEIPWILRPGFTRTRTLPLKLV

>CYP105G5 (2518491486) *Salinispora arenicola* CNY260

LTIETTETTPADDSLRA PLPRQFMQRDDPSKLPPALAA LAEQSPVGRSTL  
PDGDPFWMVSGYDEARAVLS DPRFSSDRFRYHPRFKKLSGQLGERLRNDK  
ARAGSFINMDPPEHTRYRKLLTGQFTVRRMRQLTVRIEQIVTEQVDVMLA  
EGNSADLVSAFAVPVPSLMICELLGVRYEDRTEFORRAAGLLQTDLP IKQ  
AVENLEAQRAFMQRLVTDKRRTPADDMISGLVHHAGAEPPLTDDEL VGIA  
TLLLLFAGLDTTASMLGLGMFMLLQRPEQMAVLRDDPSRIGDAVEELLRYL  
TVVSTGLFRFAKEDVVLGDEH IPAGSTVVVSLMAANRDGRHWPEPETLDV  
TRVRSSHLAFGHGVHQCLGQQ LARIELTVGITELLRRLPNVRLAVPPADV  
PLRNDMITYGVHRLPILWDT P

>CYP1051A1 (2518491510) *Salinispora arenicola* CNY260

MATDAAITRARTVPAWKALPAAVRDTHR ALVDVGNWSDGDVVRVSLGVSR  
PYLVTNPAHVQEVLHERAAIYPRGDDTALWRSVRKLVGDGILAEGDAWAA  
SRRVLAPMFRPARINAMVD TMADAIAGAVDDLHGAATAGTPIDVGRELSR  
IVCSAIMRVFFADRITVRDALRIMKAQETIVTAMAPRILAPLPWWIPMP  
GDRRFRAAVRSID DILLPVLRQAQRQPDDGDDL SRLVVRARADDGRALSE  
KMRDDLVSMVAVT TETSTVVLTWLWPLL ANHPDVANRLYDEIDRVVGGG  
PVRGDHLAELTYTRMVLD ELLRLYPAGWILPRRAATTDVLGGVRINKGAT

VILSPYVTQRMATAWWGPAAEAFDPERFAAGREAADGRHRYAYYPFGVGMH  
RCLGEHLFNLEAILIVATLLSRFRFALTDTSMPGVKVAASSTRPARTVEMI  
LKPVPVPPAR

>CYP1005A1 (2518491765) *Salinispora arenicola* CNY260

VSAVLFRSWTKTAGTRWPDVTRVADQSGTEHLVVTRHALVRQVLTDQATY  
RPDNAMEAVTPIPVAAALRVLAGHRFRLPPTLANNGGVSHPAIRALVADAL  
HPTKVAAQRPWLTLGLVADRVASIRTTLDSSGFPVDLYADLTADLPLLVLAR  
LVELPDADPVNAVQKFARAALFLFWAPLDADRQLALADEVGRFHVQLREFA  
DTGGGLAAALRATGHSPDVLVGALFFLLVAGQETTSQFLTLLHRLSGEP  
TIRAALRAGSSSVAHVVEEGLRLEPPIVTWRRVAAVDSTLGGTTVAAGTS  
VLLWLLARAGRDPVVAAPDEFPRPGQRGSRRHLAFGAGAHRCCLGDQLARME  
AAVVVEQATPLLDGVTVVRPPWYPDNLTFRMPDAFVVR

>CYP105BL2 (2518491966) *Salinispora arenicola* CNY260

MSSHSAAAPDPETATPLHTLAPELTFPQFERSTPFDPPQAYTELSGRCPV  
APVSMADGKPSWLITSFEGVRTTLSDPRFSSDMSHPGFNRTGKPVDDL  
KDTLGAMDGERHRYRRLMTGELTVRRAKAMRPVITQITDEALDQLAAAG  
PGADLVKHVAFVVPSPRVACHLVGIPLSYELFTGMAATLMDSTSSDDQFA  
ALQNMVSYFDTLVTDREHHDRDDLGHMVRRYLATGELTRDMLIRLAWTT  
MAAGQETTAHMIIGLVAALLRHPDQLELLRREPHLLPGAVDELMRYLPLI  
QFGIPRVAMDDVEVDGQTVTAGEGVVALPPLANRDPVFERPDELDVRRN  
ARQHLTFGYGPHQCPAHALARLELEVYGRLLERFPTLRLADSNADLKVQ  
DKDIMYRVSELAVTW

>CYP105J3 (2518492408) *Salinispora arenicola* CNY260

MTDSVAFFPQGRVCPHQPAPGYRPLAVQRPLAQVTLYDGRRVWAVTTRDLA  
RRLLVDPRISSDRNTNPAWPAIVPIVAAAVNDAQQKVLKIATALVGTGPE  
HKAQRKMLIPSFTRFRMNALRPMIQEIVDQQLDEMIKSGAPTDLIPAFAS  
AVPVTVLYRLMGIPDDDHGIFEKLSHQLLAGPNANEAYDQLMGYMSRLIA  
ERRRNPGEGLVDDLQAQHGANDDADHDELVSTLVVQVAGNHGTTGSMIAL  
GLFALLQHPEQLAELRADPSLMPTAVDELLRFLSVPDAVTRLAADDIEVE  
GTIIRKGDGVFFITSLINRDTDVHDAPNSLGWHHASAADHLTFGFGAHQC  
LGQSLARITMEIALGALIDRLPSLRLAVPAEEVPFLPAASLQVIAELPIT  
W

>CYP125A41 (2518492584) *Salinispora arenicola* CNY260

MTEPRIPAGFDFTDPEVLAHRVPREEFAELRRTPVWVWNAQPRGSAGFDD  
DGYWVVTRYADVMTVSRSDTYSTRENTAIARLRPDTTREDIEMQRVIML  
NVDPPEHTKLRAIVSRGFTPRAINALRGSLAERAHIVRDAAVRGVGDV  
TDVACELPLQAI AELIGVPQHHRKVFWDWSNQLIGYDDPAYGTDPLTASA  
ELLAYAMEMAEERQSPSDDLVTCLVNAQIDGELTTDEFGFFVMLLAVA  
GNETTRNAITHGMVAFLDNPEQWELFKAERP KSAVEEII RWATPVNVFQR  
TALVDTV LGGQAI SAGQVALFYGSANFDEAVFEDPERFDITRSPNPHLG  
FGGSGAHFCLGANLARLEIELIFNSIADHLPDIRKVAAPQRLRSGWINGI  
RQMPVRYR

>CYP211C1 (2518492733) *Salinispora arenicola* CNY260

VVDVEELLTRYLSAQGRQDPFPVYADLHAQGPIAALPPEPERRRVA AVAV  
GYDLVGAVLRDPEWSKAPPPGWTEQEILRTLQTSMMFINPPDHGRMRHVF  
AGTFTPRRLGALEPVVNRVADELLDRMADAGAGGLDFVAEFAYPLPARVM  
AEFIGIPETELDWYRERVDVIDAFLDVAGKTPQRLAAANAAGAE LRAFYG

ELLARRRRTPGEDLISGLVEAVDAGGVELTEDELVSNLIVLFNASFVTTV  
YMLSNGLPVLLAHPEVAAALATDPVLTAGAVDEILRLQAPVHLLARAAPR  
DTVLGGVPIPGQGNVLLLIAAANRDPAHFPDPDRFDPWRS GPPSLAFGLG  
LHYCLGAAVSRLEGRLLPRLLSRFPRLRIMEQPVYSGSLFLRGIDKLSV  
SPGEGSTRE

>CYP208A12 (2518493652) *Salinispora arenicola* CNY260

MTLDTITPRVPLGPRTAALRMLLVMKRDRLGMLTSAAARYGDASRLPVG  
HKALWFFNHPRYAKHVLADNSANYHKGIGLVHARRALGDGLLTSEGLWR  
KQRKVIQPAFQSRRIAQQAGMIAEEAFALVERLRARAGAGPVELTAEITG  
LTLGVLGRSLLDADLAGFDSIGDSFATVQDQAMFELETINAVPMWIPLPR  
QIRFRARRRKLQAVVDTLVDGRAGNLADRVDVLSRLILSARGEADPRVGR  
ERLRDELVTLLLAGHETTASTLGWTLSLIDRHGPGVWERLHAEAVEVLGDR  
LPEYDDLRLRLRYTVMVVEEAMRLFPPVWLLPRRALAPDTIGEYRVPANAD  
VVISPYTLHRHPEFWPNPERFDPERFAPGQAADRPRYAYLPFGAGPRFCV  
GNNLGMMEAVFVIALLCRHLRLTGVPGYRLVPEPMLSLRIRGGGLPLVVRP  
VS

>CYP211B2 (2518494206) *Salinispora arenicola* CNY260

MDVSEAI AVLISPSGRLDPYPTYEQ LRAHG PVSRTTAGLFVVTGYAEADM  
VLRDPRFVVLDDDLRDDVFPHWQDSPAIKSIARSMRLTNPPDHSRIRRLA  
AGAFTPRRVAAMREVVTQADELVDDEMIRAGRDGARVDFMDMFAYPLPVA  
VICALLGVPAADRSRFRRWAGDLTGILEPEITPEELAGADAGADELRDYF  
TGLIEQRRRAPADDLTALVQAHDADGDRLSGEELLANLVVLLVAGFETT  
TNLLGNGLVVLLTRPEAAAAALRDEPD LAPGYVDELLRYDSPVQLTTRTVR  
ESVSFAGTELPADSWLLVLLGAANRDPRRFPDPARFDPGRAQSQPLSFGA  
GPHYCLGAGLARLEAQVAFPLLLRRLPELALAGRPSRRTRLTLRGYETLP  
ITVGAVTADRGTAGVAPGTP

>CYP105W2 (2518494322) *Salinispora arenicola* CNY260

MTGYQDRPTGDQPGAPVPSGSTDPGIGAFPLPRRCPFSPPAEYARLRAEH  
PVVRLPMLGGDTAWVVS RHADVRQVLS DPRMSADRRRP GF PKFAPTTEGQ  
RQASFANFRPPLNWLDPPEHAICRRQIVDEF SVRRVRQSRALVERVVDTH  
LDALTAAPGADLVSTFAYPVPSQVICEVLGVYPYGEHEFFERRSTLMFRR  
STPADERAR CAREIRDFLDMVVT DKEHRPGDDVLSRLLYRQRRAGGVDHE  
AVVSMAFVLLVAGHVTTSNMMLALSVLALLTHPARLARLRAE PERFPAAVE  
ELLRYFTVVEAATARTATAEVTIGGV TIAAGEGVVALGQAANRDP RVFEH  
PDEFDPDRDARAHLAFGYGRHICPGQHLARLEMEVALSRLFRRLPGLRLT  
MEVSDLPLKEDSNIFGLYALPVAW

>CYP248A2 (2518494330) *Salinispora arenicola* CNY260

VLADAVTAFDPTAVDVRRDPYPSYHWLLRHDPVHRGAHQVWYVSRFADVR  
AVLGDERFARTGIRRFWTDLVGPGLLSQIVGDIILFQDEPDHGRLRGVVG  
PAFSPSALRRLEPTIEATVNDLLRPARALGAMDVVADLAYPLALRAVLEL  
LGLPAGDANAVGRWSRAVGRTLDRGATAEDMRRGHAAIAEFADYVERVLA  
ERREDGADLLALMLAAHRSQ LMSRNEIVSTVVT FIFTGHETVASQLGNGL  
LSLLDHPEQMELMRQPHLLPHAVEECLRFDP AVQSNT RQLAADVELHGR  
RLRRDDVVVVLGAANRDPGRYDRPDELDIRRDVPVSM SFGAGMRYCLGS  
YLARLQLRTALGAMVALPDLRLVCSPNELAYQPR TMFRGLTRLPVAFTPA  
G

>CYP107FS2 (2518494390) *Salinispora arenicola* CNY260

MPVPQGEQNLTTTEVFADPKALFATLGSRQPLHRISLPDGMFAVLVTGNRE  
ARQALSDPRLVRSITAAAPELHKYHPLASDDYALSRHMLFADPPDHGRMR  
KLVSTAFTRRRVEQMRPRIQQITDDLIDVIAAKGEADLVETLALPLPIAV  
ISEMLGVPFADRSEFERHAEVLTGINASSGFDAIIAAGRWFDEYLAELVQ  
QRRREPQDDLISGMLAAQDKGDRLTDVELRSNALLLSAGFETTVNLVAN  
GLLALLRHPEAMAALRSEPNLMTTAVDELLRYDSPVSCVTYHFAQEPVEI  
GGFEIRSGEHVVIAAAAAANHDPTVFADPSRLDLRREGSGQILSFSGIHF  
CLGAPLARLEGEIAFGTVLRRLAGLRLAVPTDSLWVKASFVLRRLERLPV  
TFTPDRAPNPIDSVHTV

>CYP105CN1 (2518494391) *Salinispora arenicola* CNY260

MAAPAPQATQSTTPHPPSYPLPRECPYRPSAGTARLRDAGPVSTVRLYDG  
RTAWLVTGAEEARALLADSRVSNRADFPNYPVMDEHLSMRATREMAREE  
EGGFAAALFGMDPPEHTRQRLQLLPRFTVRQVAARRPAIQRIVDEHLDAM  
EANGSPADLVSAFATPVPTMVVCTHLGVPYQDRTRFEPVAGLFEPDRAD  
AAMAEALTAYLHQLIETKQSEPGDGVIDHLIANHLRPGAIDRAELVAIASA  
ILVAGTVTTSSAIALGTLALLTAPGQYAALVDNPDLPVPGAVNEILRYLSL  
VEQLARVATEDIEIGGKLIRAGDGIIVSFAAGNLDPNVTHPDRLDVALP  
PTNHLAFSHGIIHCIGQNLALLELDIAFRALVSRFPTLRLAVPAEQLPY  
FAGDVPRLACLPTVW

>CYP105CP2 (2518494393) *Salinispora arenicola* CNY260

MTKSMPVQDLPAFPIPRECPYRPSAQHVSLRSGGPMKVRVLYNGRTAWLV  
TDSAHARAVLSDYRRVSIKPYHGNYPILLNEEFKVVDSGYADVLFGVDP  
EHTRQRMIMPSFTLRRTAVLRPDIQRIVDDKLDMMRHGAPGDLVTEFA  
QPVPSMVSFLLGVPWEDHEEFETPAHKLFVPELAEAEATTELGAULERLI  
QKKEQPGGTPGGTGLLDDLIRDHLRAGALSRDELVHIAMAMLVAGTDTT  
NVISLGTALLDNPDQWAALRDNPDDELIPGAVEEILRYTSLIEAFARVAV  
SDIELNGAVIKEGEGILISSAGVNFDPALAPDPGRFDIRRPPRPSFSFSH  
GIHRCPGDNLARLELEIAFRSLVTRMPNLRRTAKPIDQIPSNNDGTLQRL  
YELPVVW

>CYP107AY2 (2518494544) *Salinispora arenicola* CNY260

MTAEPTPIPRSGARLGQEYDQLRKTGDVHQVLLPDASLAWLVTNPEVAAR  
ALADPRLALNRRNSRGGWSGFALPPALDANLLNLDAPDHTRLRLRVGPAF  
SPQ RVAALRPGIRRAAEHLDDLVTATSGPTDLVTGYCNPLSVQVIADLMG  
VPEAGRNLRAWTDMLTSYPPDRDAIRRAVTELHGYYVDLIDIKQQQPG  
DDLSTLVITIEQDGRLSRDELTSLAFLILFAGYENTANLIASAVLWLLD  
HGGLNVVPISEAIEGTLRHEPPAPVAIRRFPTEDIIIGGVITIPAGDTVLL  
SVAAATRGADGNAARLAFGNGPHYCLGAALARVEAEALTVLARRLPGLT  
LAVPPSQVRWRPTFRTHGPAELLVGW

>CYP105CT1 (2518494570) *Salinispora arenicola* CNY260

MNSPNHMPADRSLTAPTSGCPMALSRGRVGLDVADEISELRDGGRLGRIT  
TAFGQEATLITRYDEVRAQMADSVFNVAGVPSPPALVDGGFDTESVRRR  
RTVGNLIMLDPPEHTRLRRMVAAWFTTRRVERLRPRVVEIIDAALDEMER  
SGPPVDLVAMFAKTVPITVICELIGVPEELRERYRRRAERAVSASAVSTP  
LDELRLREAGWVSRELIEYHRENPSDDIIGMLLREHGTDSDHDDGITTDE  
LVGLANALLIAGHETTTQMLSMGTLALLRHPDQLALLRDDPSIVAGAVEE  
LLRYVGV LHGGFVRVATRDTRLGGHRIHAGELVVPALTAANRDPRLTLDG  
DRLDITRPPTSHVAFGHGVHFCIGAPLARMELREAFPALLRRFPGLRLAV  
PDSELEFTQGTTVYSLRGLPVTW

>CYP154M5 (2518494587) *Salinispora arenicola* CNY260

VEQSCPYKLDVTGRDVHAEGEAI RARGPVAQVELPGGVQGWSVTGYQAAR  
QVLADPRFAKDPKKWPAYTSGAIPPNWPLIGWLLMDNMTTNDGADHQRLR  
KLVSHGFTPRQVERTRPLIVKIVNDLLDGLSSAGPDEVVDLKGRFATPLP  
ARVICDMFGVPEALRASVLRGAQVNVVTSSISGEEAEANVEQWHRELLELV  
EAKREKPDDEDMASLLIAAKEEDGSTLTQEEVVGTLLHMLGAGSETLMNAL  
SYAVLGMLSNPGQYEMVRNGTSSWDDVIEETLRAQAPVAQLPLRYATEDV  
AVGGAVIKAGDPVLMGFTAIGRDPVHGETAGDYDITREDKTHLSFGHGV  
HFCLGAPLARLELKIALPALFERFPNMTLAVRPDQLEPQGTIFMNGHREL  
PVRLGQPATVLA

>CYP166A4 (2518494730) *Salinispora arenicola* CNY260

MTDAISFELPWARTDKFDPPAVFDALREQRPLARMRYPDGHVGVIVSSYE  
LVREVLGDPRFSHSCAVGHFPVTHQGQVIPTHPQIPGMFIHMDPPEHTRY  
RRLLTGEFTVRRTSRLTGHVEGVATEQIEVMREHGAPADLVATFARPLVL  
RVLSGLVGLPYGERDRYLHAVTLLHDAEADPAEAAAAAYEQAGAYFDEVIE  
RRRRQPEDDLISTLVGDGELTGEELRNIVTLLLLFAGYETTESALAVGMFA  
LLHHEDQLARLRADPTKIDAAIEELLRYLTVNQYHTYRTASEDIELHGEV  
INKGDSVTVSLPAANRDPARFACPAELDIDRETSGHVAFGFGIHCCLGQN  
LARVELRAGLSALLRAFPNRLRLAVPADEVPLRLQGSVFAVKNLPVCW

>CYP245A7 (2518495028) *Salinispora arenicola* CNY260

MPSATLPRFALTGWSRENIVNPYPVYQRYREVASVHRGEPGGDAPDTFYV  
FSYDEVVQVLSSNCFGRGRSLDAAKASVPVPAEQKALRAIVENNLVFMDF  
PRHTELRSLLNRSFSPRIVTELPRPRIARIAQELL SRLGQQVDVDLVESFA  
APLPILVISELLGIPEERRAWLRANALALQEASSSRAGRDVDGYARAEVA  
AQEFTEYFREQVRLRRGRAGGDLITILANAQERGAPVSLDAIVGTCVHLL  
TAGHETTTNSLAKAVLALREHPAVLDELRGAEGLTTDAVEEFLRYDPPVQ  
AVTRWAHQDITLGGCDIPRGSRVVALLGSANRDPARFSPDVLDVRRPAD  
RHLSFGLGIHYCLGATLARAELEIGLQALLDGVP T L G Y G T Q H V D Y A D D L V  
FHGPSRLVLVNLGERCK

>CYP244A4 (2518495032) *Salinispora arenicola* CNY260

MSTTTNTELTEAPETNMPVDPLGFDLDCMPDLIAAARVAPVVRIPYLGRHAW  
VVCDELVKQALHTPKMGKDIALVPEWMMRQPLMVTAQPDPEYARAMIMS  
DGENHARIRRIHAPVLSRPNTERWGERVADKVEGFLDELSQAGSGGSTEV  
NVVTNYTHKIPLAFISEMLGLPPEAEHRLRGITDIMLYSSDYAARREAIG  
GLFGAVEDWVRNPADLRDGVITGLLAASDGPDAAVTEGEVIVWTLGMIIT  
GYETTGSLLISTSLYEAIRPPHERPKTDEDITAWIEETLRVHPPFPHTW  
RFPLEDIELGGYLIPKGAPVQVSIAAANRKPGEAGDSFDAERRGHGHLSE  
GLGMHYCIGAPLVRLEAQIAVRGFLRRFPQARLSTETAVQWESEWMIRRM  
SVLPAVLS

>CYP105AB8 (2518495664) *Salinispora arenicola* CNY260

MTETASSRLTDTEFPVQRECPFAEPVEYEQIREQSSIAMVRLTGGGEAWW  
ISGHEQGRAVLADRRFSSDRKVNFPFVSTDPAIRKRLHAQPLSLISMDG  
AEHTQARRALIGEFTVRRLAALRPRIQQIVDQCIDEMLTDDQHRADLVKT  
LSLPVPSLVICELLGVADHDFQEHATLVRRTASEVRQHSIDELNA  
YLGALIDRKLASPDLLGRQIARQHRDGTFRSSMVSLAFLLLVAGHET  
TANMISLGVVGLLQHPEQLAMIKDDPKTPLAIEELLRFFTIVDSVTSRV  
ATEDVRFGDTTINAGDGVVVVSGLSADWDPTVFADPDRLDLERGARRHHLAF

GFQPHQCLGQNLARLELQIVFDTLFHRIPTLRLAAPLDKIPFKTDAAIYG  
ARELPVAW

>CYP105CH1 (2518495956) *Salinispora arenicola* CNY260

VSSLPLPTYPKLRDPADPLLPPAEYLAIQSEKPIAKVLLPSGRPTWLITG  
HALARQVLTEPCVSVDRRHFNFPYPVPNPDAVVAQVARWTYILLGDDPPL  
HTERRLLI SEFTVRQAQAMRPRIQQLVDFHLEQLIAAGPGADFSKHFAM  
KVPSAVICEMLGVPFADHDYFQERTALQLRRDVPVAAQKQAIDELLAYFE  
QLIQEKSSHPGDDVLSRLIVSNRETEAFDHEALVALGLLLLLVGGHETTAN  
TLTLATATMLERPEIAEQLRTDPSLMPSAVEEFLRYFSVAVAVSRIATAD  
LQVGGQLVRAGESMLLVLNLTARDGTVFPEPHRLDIRRNARNHLAFSHGI  
HQCMGQNLARVEMQIALDTVLRRLPGLHLVAPFEELPFKYRHLVWGIEEL  
RVAW

>CYP1114C1 (2518496450) *Salinispora arenicola* CNY260

MVTTTNQVVDYNPLLLLEPDYTTYRKLRLDEAPVYRGYCDAGEFWALS RFA  
DVQAAVRDWETFSSAEGNDLDDTGLLFGPGPSMDICDPSVHTRQRAVLKR  
EFRREVVETRLQPAARRKVRQLLDRFGGTDQDFDAQEFGYPLPFGVICDW  
LGLPASDHEQLMRWHATMLSRSPGKVALPPGVMYAQHEMFDYLR EAVTWR  
CVKPDQDDLTVLANALNGGVMSDEV LGNAFFLFDAGIVSTSALLSSTLL  
HLHAFKEQQRLLWSHPPELVPTAVEEMLRYDAPFQWFTRVTTREVELHGLP  
VPAGARVVLIWGAANRDERYWTDPEL RVNRRPQRHLSFSDGIHRCLGAG  
LARMEARVLEELIPAFADYSIMGPVERRITP SERTIARMPLAVRWSSER  
RRADDGA

>CYP107EU1 (2518496497) *Salinispora arenicola* CNY260

VTIGQTL PDLVYSPEFTRDPYAIFARLREQAPVCRVTTHRGMSAWMVTRH  
ADVRALLADNRLAKDGNRIGELMPRHSTLTGAATGFP PGLTNNMVNSDPP  
DHTRLRHLVGREFTGHRVEGLRPRIEEIVDDLLDGVAACGDEADLAETLA  
RRLPIAVIGELLGVPEADRAEFFRWADTLYGGTASPEALGQAYNAIVDYL  
GRLCDAKRDPADDLLTALVQVSADEDRLSREELVSMALLLLVAGHETTS  
KQISNGVLALLLNPEQLKLLKAQPARTAGAVEELLRFEGPSLSASLRFTT  
EPVEVAGVVIPEGEFVLLSLASGNRDPEKFPDPDRLDITRSTQGNLAMGH  
GIHHCVGAALARLELEIVLSRLVARFPQMQLAVEADDLEWLVNSFFRAPL  
HLPVSLRR

>CYP1198B1 (2518496630) *Salinispora arenicola* CNY260

MSGELTDQRTAPGAGGNPLRSLMDHGIRANPYPLFGELREAGPTAVEDGS  
VVLFGHEYHCSQILRHRDMGSDTSEAPSIKGFVVDDAERAGSSIFFMDQP  
GHGRQRKLVSKSFTPRIVKSFGPQITHIVDGLFEDFRDKGELDVVTDLAY  
PVSIGIICDLFGIPDDERDMLKEWSDDLALSTELPTLGAAIGVLNVFTRD  
EINRFGSVAMAAHAYFADLIHRRRKNPGDDLVSLLATESNGERLTRFEV  
TSVLATLFVAAHESTTNLISGGILALLRNQDQMAVLRENPG LITNVVDES  
LRYDPPVHLAARMARARTTIGGYDLDPGTIVVVLMAAGNRDP RAYENPDV  
FDVNRKIRNVSLAFGAGAHFCIGSGLAKLEAEIAISAF AQRLKHPEVDES  
SLEYRRHIVVRGLEHMKVSFQP

>CYP208A12 (2526200382) *Salinispora arenicola* CNT799

MTLDTITPRVPLGP PRTAALRMLLVMKRDLGMLTSAAARYGDASRLPVG  
HKALWFFNHPRYAKHVLADNSANYHKGIGLVHARRALGDGLLTSEGD LWR  
KQRKVIQPAFQSRRIAQQAGMIAEEAFALVERLRARAGAGPVELTAE L TG

LTLGVLGRSLLDADLAGFDSIGDSFATVQDQAMFELETNAVPMWIPLPR  
QIRFRARRRKLQAVVDTLVDGRAGNLADRVDVLSRLILSARGEADPRVGR  
ERLRDELVTLLLAGHETTASTLGWTLSLIDRHGFWERLHAEAVEVLGDR  
LPEYDDLRLRLRYTVMVVEEAMRLFPVWLLPRRALAPDTIGEYRVANAD  
VVISPYTLHRHPEFWPNERFDPERFAPGQAADRPRYAYLPFGAGPRFCV  
GNNLGMMEAVFVIALLCRHLRLTGVPGHRLVPEPMLSLRIRGGGLPLVVRP  
VS

>CYP105BL2 (2526201160) *Salinispora arenicola* CNT799

MSSHSAAPDPETATPLHTLAPELAFFQFERSAPFDPPQAYTELSGRCPV  
APVSMADGKPSWLITSFEGVRTTLSDPRFSSDMSHPGFNRTGKPVDDL  
KDTLGAMDGERHRYRRLMTGELTVRRAKAMRPVITQITDEALDQLAAAG  
PGADLVKHVAFVVP SRVACHLVGIPLSDYELFTGMAATLMDSTSSDDQFA  
ALQNMVSYFDTLVTDRHHDRDDLLGHMVRRYLATGELTRDMLIRLAWTT  
MAAGQETTAHMI GLGVAALLRHPDQLELLRREPHLLPGAVDELMRYLPLI  
QFGIPRVAMDDVEVDGQTVTAGEGVVALPPLANRDPVFERPDELDVRRN  
ARQHLTFGYGP HQCPAHALARLELEVYGRLLERFPTLRLADSDADLKVQ  
DKDIMYRVSELAVTW

>CYP105CH1 (2526201235) *Salinispora arenicola* CNT799

VSSLPLPTYPKLRDPADPLLPAPAEYLAIQSEKPIAKVLLPSGRPTWLITG  
HALARQVLTEPCVSVDRRHFNFPYPVPNPDAVVAQVARWTYILLGDDPPL  
HTERRRLLI SEFTVRQAQAMRPRIQQLVDFHLEQLIAAGPGADFSKHFAM  
KVPSAVICEMLGVFPADHDYFQERTALQLRRDVPVAAQQAIDELLAYFE  
QLIQEKSSHPGDDVLSRLIVSNRETEAFDHEALVALGLLLL VGGHETTAN  
TLTLATATMLERPEVAEQLRTPSLMPSAVEEFLRYFSVAVAVSRIATAD  
LQVGGLVRAGESMLLVNLT IARDGTVFPEPHRLDIRRNARNHLAFSHGI  
HQCMGQNLARVEMQIALD TVLRRLPGLHLVAPFEELPFKYRHLVWGIEEL  
RVAW

>CYP105AB8 (2526201312) *Salinispora arenicola* CNT799

MTETASSRHTDTEFPVQRECPFAEPVEYEQIREQSSIAMVRLTGGGEAWW  
ISGHEQGRAVLADRRFSSDRKANFPFVSTDPAIRKRLHAQPLSLISMDG  
AEHTQARRALIGEFTVRRLAALRPRIQQIVDQCIDEMLTDDQHRADLVKT  
LSLPVPSLVICELLGVPYADHDFQEHATLVRRTASEVRQHSIDELNA  
YLGALIDRKLASPDLLGRQIARQHRDGTFRSSMVSLAFLLLVAGHET  
TANMISLGVVGLLQHPEQLTMIKDDPKTPLAIEELLRFFTIVDSVTSRV  
ATEDVRFGDTTINAGDGVVVSGLSADWDPTVFADPDRLDLERGARRHHLAF  
GFGPHQCLGQNLARLELQIVFDTL FHRIPTLRLAAPL DKIPFKTDAAIYG  
ARELPVAW

>CYP107AX13 (2526201415) *Salinispora arenicola* CNT799

VTSPPHVAFGHLLRDPHGQYNALRGQAPVHHIRTPDGAPAWLVMRYDDV  
RAALTDPRLSVDKRFSDTDGEHGSSLPELDAHLLNRDPPDHTRLRLRLAA  
AAFTPRRVADQAPAVATIVDALLDGIAGQDQAEIIVGLASPLPLQVMHEL  
LGLPTQTSVDFRNWTNTLLSADANQPAQSR SAMATMRQFLMGQLARKRAQ  
PGDDLLTGLLAARDDDRFTDDELLAMVFLLMFAGYDNTAALIGNVTHAL  
LTDAGLHDAVRAGSVDDLSDVDEVLRWNPSFPLAVRRFAREPVTIAGHTI  
PAGDRVWLCLASANRDPAQFTEPDELGITPARRPHLAFGHGIHYCLGAPL  
ARLQTTVAVASLLDRYPGIRLAVPAHELRLWRESFRVRGLAALPVRL

>CYP166A4 (2526201572) *Salinispora arenicola* CNT799

MTDAISFELPWARTDKFDPPAVFDALREQRPLARMRYPDGHVGVIVSSYE  
LVREVLGDPRFSHSCAVGHFPVTHQGQVIPTHPQIPGMFIHMDPPEHTRY  
RRLLTGEFTVRRTSRLTGHVERVATEQIEVMREHGAPADLVATFARPLVL  
RVLSGLVGLPYGERDRYLHAVTLLHDAEADPAEAAAAAYEQAGAYFDEVIE  
RRRRQPEDDLISTLVGDGELTGEELRNIVTLLLFAGYETTESALAVGMFA  
LLYHEDQLARLRADPTKIDAAIEELLRYLTVNQYHTYRTASEDIELHGEV  
INKGDSVTVSLPAANRDPARFACPAELDIERETS GHVAFGFGI HQCLGQN  
LARVELRAGLSALLRAFPNRLRAVPADDEVPLRLQGSVFAVKNLPVCW

>CYP1005A1 (2526201725) *Salinispora arenicola* CNT799

VSAVLFRSWTKTAGTRWPDVTRVADQSGTEHLVVTRHALVRQVLTDAQTY  
RPDNAMEAVTPIPVAAALRVLAGHRFRLPPTLANNGGVSHPAIRALVADAL  
HPTKVAAQRFPWLTGLVADRVASIRTTLDSSGGPVDLYADLTADLPLLVLAR  
LVELPDAPVNAVKKQFARAALFWAPLDADRQLALADEVGRFHQVLRIFA  
DTGGGLAAALRATGHSPDVLVGALFFLLVAGQETTSQFLTLLHRLSGEP  
TIRAALRAGSISVADVVEEGLRLEPPIVWRRVAAVDSTLGGTTVAAGTS  
VLLWLARAGRDPVVAAPDEFPRPGQRGSRRLAFGAGAHRLGDLQARME  
AAVVVEQATPLLDGVTIVRPPWYPDNLTFRMPDAFVVR

>CYP105CP2 (2526202354) *Salinispora arenicola* CNT799

MTKSMFPVQDLPAFFIPRECPYRPSAQHVSLRSGGPMKVRLYNGRTAWLV  
TDSAHARAVLSDYRRVSIKPYHGNYP LLNEEFKVVDSGYADVLFVGDPP  
EHTRQQRIMPSFTLRRTAVLRPDIQRIVDDKLDEMRRHGAPGDLVTEFA  
QPVPMSVISFLLGVPWEDHEEFETPAHKLFVPELAEAEATTELGA YLERLI  
QKKEQPGGTPGGTGLLDDLI RDHLRAGALSRDELVHIAMAMLVAGTDTT  
NVISLGTALALLDNPQWAAALRDNPDDELIPGAVEEILRYTSLIEAFARVAV  
SDIELNGAVIKEGEGILISSAGVNFDPALAPDPGRFDIRPPRPSFSFSH  
GIHRCPGDNLARLELEIAFRSLVTRMPNLR TAKPIDQIPSNNDGTLQRL  
YELPVVW

>CYP105CN1 (2526202356) *Salinispora arenicola* CNT799

MAAPAPQATPSTTPHPPSYPLPRECPYRPSAGTAHLRDAGPVSTVRLYDG  
RTAWLVTGAAEARALLADSRVSNRADFPNYPVM DERHLSMRATREMAREE  
EGGFAAALFGMDPPEHTRQRLPRFTVRQVAARRPAIQRIVDEHLDAM  
EANGSPADLVSAFATPVPTMVVCTHLGVYPYQDRTRFEPVAVAGLFEPDRAD  
AAMAELTAYLHQ LIETKQSEPGDGVIDHLIANHLRPGAIDRAELVAIASA  
ILVAGTVTTSSAIALGTLALLTAPGQYTALVDNPDLPV GAVNEILRYLSL  
VEQLARVATEDIEIGKKLIRAGDGIIVSFAAGNLDPNVTTHPDRLDVALP  
PTNHAFSHGIHHCIGQNLALLELDIAFRALVSRFPTLRLAVPAEQLP TY  
FAGDVPRLACL PVTW

>CYP107FS2 (2526202357) *Salinispora arenicola* CNT799

MPVPQGEQNLTTTEVFADPKALFATLGSRQPLHRISLPDGM PAVLVTGNRE  
ARQALSDPRLVRSITAAAPELHKYHPLASDDYALSRHMLFADPPDHGRMR  
KLVSTAFTRRRVEQMRPRIQQITDDLIDVIAAKGEADLVETLALPLPIAV  
ISEMLGVFPFADRSEFERHAEVLTGINASSGFDAIIAAGRWFDEYLAGLVQ  
QRRREPQDDLISGMLAAQDKGDR LTDVELRSNALLLSAGFETT VNLIAN  
GLLALLRHPEAMAALRSEPNLMTTAVDELRLYDSPVSCVTYHFAQEPVEI  
GGFEIRSGEHVVI AAAANHDPTVFAAPSRLDLRREGSGQILSF SHGIHF  
CLGAPLARLEGEIAFGTVLRLLAGRLAVPTDSL VWKASFVLHRLRLPV  
TFTPDRDPNPIDSVHTV



>CYP125G6 (2526202396) *Salinispora arenicola* CNT799

VPTLLNEHVS YDGA AIAIV DSDGATSWIRLA ERVNRVHLLRAHGLDTGD  
RLACVTGNRRETF EVLLAALHTGVTVPVNVHLLTVTEIGHILSDSGSRVV  
ITEELHV KAVAAAADGTAGPVAGLV LGDREVEGFAAVE PLLAAA SPAEPE  
GQVCGATMLYTS GTTGRPKGVVNNLFVTGAPYARVGRLCDYARSVLGVPR  
RERMLLDGFWYHSSQLFFALLSLLQGSRLVIRPYFDPAATLKTIDDHRIT  
VTHLVPTQLVRLLRVDALTRQMFSGASLRRVWHGGGPCPPEVKRSMIDWW  
GPVLVEYYGATEGGVVT LIDSAEWLARPGSVGRAVPPSEVVVVDDGGQSV  
AAGQTGQVFFRRRTGNRFHYHNAPEKTQAAYLAPDTFTYGEVGHVDEG DY  
LFLTGRAQDMIVSGGVNVYPAEVEAALLRHPVVRDAAVIGVADDEFGERV  
VGIVVPETA VDPDDLATHLDAHCRVSLAGFKVPRTYRVVESLPRDET GKL  
RKDALRSKFGWLSGAAMTVPRPATGQPTAHRPDIAHPTTYVSGVPHDEFA  
RRRRDEPVGWVAEPVLTRHTAAGRTATRGSGFWAVTRYEDVVAASRRVTD  
FSSAAKGAF LTPRTPADLQQARQLLVNMDDPHHARLRKLVTSVFTPRAV  
RGLLASIDAHA AALVAKVVAAGEFDVVTDLAAELPLLVLADLLGVPKQDR  
ALLYGWSNHLVGFD DPDFGGGDIDAYRTAMAEAFQYALNLGVERRARPTD  
DLVSLLANAEVDGTR LTRDREFCNFWLLLVVAGNETTRHLVAGTMQALTEH  
PGE CARLVEGRVPMESAVEELLRWVTPIMQFRRTATRDTEIGGQAVTAGE  
KVVLYYTSANRDATVFAE PERLDLGRTPNRQLSFGIGPHYCLGAHLARAE  
LTALLRVMSPHLGSLQLTG PVSRLASNFVNGVKAMPAVIGSR

>CYP154M15 (2526202421) *Salinispora arenicola* CNT799

MNDKCPFAALDVTGQDLHGEEAARLREQGPAVLVELPGGVKAW SINRYEVI  
RELLMDRRVTKNARKHWP AFIKGEIPPDWEMISWVAMDNMVTAYGKDHVR  
LRKLVGRAFTQRRADALRPQVVALSTKLLDDL GATPPGEVVDLRERFAYP  
LPAMLVASLIGMSEAALAACSKVIDMMVHTNVSPEEAQAVLQGWRAAMAD  
LIESKRRTPGEDITTDLIAAREEDGSRLSEAELADTIFAILGAGSETTIN  
FFDNAITALLSRPGQLQLLRTGAVTWDDVIDEVL RVESPLAHLPLRYAVE  
DIELDGVTIPQGDPI LVNYYAAGRDPALHGGTADEFDLARGDKTHLSFGY  
GPHYCLGAGIARMVATIGLSMLFERFPDL SLAVPATELKR LPTFIMNGHQ  
TLPVRLTVHAR

>CYP125A41 (2526202700) *Salinispora arenicola* CNT799

MTEPRIPAGFDFTDPEVL AHRVPREEFAELRR TAPVWWNAQPRGSAGFDD  
DGYWVVTRYADVMTVSRSDTYSTRENTAIARLRPD TTREDIEMQRVIML  
NVDPPEHTKLRAIVSRGFTPRAINALRGSLAERA EHIVRDAAVRGV GDFV  
TDVACELPLQAI AELIGVPQHRRKVFWDWSNQLIGYDDPAYGTDPLTASA  
ELLAYAMEMAEERQ RSPSDDLVTKL VNAQIDGEHLTTDEF GFFVMLLAVA  
GNETTRNAITHGMVAF LDNPEQWELFKAERP KSAVEEII RWATPVNVFQR  
TALVDTVLGGQAI SAGQ RVALFYGSANFDEAVFEDPERFDITRSPNPHLG  
FGGSGAHFCLGANLARLEIELIFNSIADHL PDIRKVAAPQRLRSGWINGI  
RQMPVRYR

>CYP107Q4 (2526202775) *Salinispora arenicola* CNT799

MTTTAETS AETIDLFSPEVVADPFGWYARLREETGPTTGTLNIGTMMGGP  
EMWLVTTRYEDVRQVLTDP RFLTNPPADSPLEDIRAGVFKRLDFPPDLIPW  
MANLLNVSDGEDHTR LRKLVS YALTAHRIGKLRPRVEKITADLLDKLAED  
GKDGSPVDLVEEYCYPLPVTVICELVGIDEPDRPHWRAWGDSMATMNGER  
IPTTLVKCIELARELIANRRAEPQDDLV TALVQAQAE DQNRVSDDEIIGI  
LFSLVTAGHQTTTYLIGNSVILLLENPDQLARL KDNPSMWPQAVRELQRL  
GPIQFAQPRFPSEDIELGGVTIPRGAPVAPLLLAANTDPRRFPDPNKLI I  
DRLAVGSEGLGFGKG IHRCLGQHLAYQEA E VALQGLFTRFPDLSLAVPR  
EEIPWILRPGFTTRTRLPLKLV

>CYP105G5 (2526202776) *Salinispora arenicola* CNT799

LTIIETTETPPADDSLRAPLPRQFMQRDDPSKLPALAAALAEQSPVGRSTL  
PDGDPFWMVSGYDEARAVLSDFRFSDDRFYHPRFKKLSGQLGERLRNDK  
ARAGSFINMDPPEHTRYRKLLTGQFTVRRMRQLTVRIEQIVTEQVDVMLA  
EGNSADLVSAFAVPVPSLMICELLGVRYEDRTEFQORRAAGLLQTDLPKQ  
AVENLEAQRAFMQRLVTDKRRTPADDMISGLVHHAGAEPPLTDDDELVGIA  
TLLLFAGLDTTASMLGLGMFMLLQRPEQMAVLRDDPSRIGAAVEELLRYL  
TVVSTGLFRFAKEDVVLGDEHIPAGSTVVVSLMAANRDGRHWPDPETLDV  
TRVRSSHLAFGHGVHQCLGQQQLARIELTVGITELLRRLPNVRLAVPPADV  
PLRNDMITYGVHRLPILWDTP

>CYP1051A1 (2526202801) *Salinispora arenicola* CNT799

MATDAAITRARTVPAWKALPAAVRDTHRAFDVGNWSDGDVVRVSLGVSR  
PYLVTNPAHVQEVLEHERAAIYPRGDDTALWRSVRKLVGDGILAEGDAAWAA  
SRRVLAPMFRPARINAMVDTMADAIAGAIDDLHGAATAGTPIDVGRELSR  
IVCSAIMRVFFADRITVRDALRIMKAQETIVTAMAPRILAPLVPWWIPMP  
GDRRFRAAVRSIDILLPVLRQAQRQPDDGDDLLSRLVHARADDGRALSE  
KRMRDDLVSMVAVTTETSTVVLTWLWPLLANHPDVANRLYDEIDRVVGGG  
PVRGDHLAELTYTRMVLDLRLYPAGWILPRRAATTDILGGVRINKGAT  
VILSPYVTQRMATAWWGPTAEAFDPERFAAGREAADGRHRYAYYPFGVGMH  
RCLGEHLFNLEAILIVATLLSRFRFALTDTSMPGVKVAASTRPARTVEMI  
LKPVAVPVAR

>CYP244A4 (2526203096) *Salinispora arenicola* CNT799

MSTTTNTELTEAPETNMPVDPLFDCMPDLIAAARVAPVVRIPYLGRHAW  
VVCDELVKQALTHPKMGKDIALVPEWMRQPLMVTAQPDPEYARAMIMS  
DGENHARIRRIHAPVLSRPNTERWGERVADKVEGFLDELSQAGSGGSTEV  
NVVTNYTHKIPLAFISEMLGLPPEAEHRLRGITDIMLYSSDYAARREAIG  
GLFGAVEDWVRNPADLRDGVITGLLAASDGPDAAVTEGEVIVWTLGMIIT  
GYETTGSLISTSLYEAIRRPPHERPKTDEDITAWIEETLRVHPPFPHTW  
RFPLEDIELGGYLIPKGAPVQVSIAAANRKPGEAGDSFDAERRGHGHLSE  
GLGMHYCIGAPLVRLEAQIAVRGFLRRFPQARLSAETAVQWESEWMIRRM  
SVLPAVLS

>CYP245A7 (2526203100) *Salinispora arenicola* CNT799

MPSATLPRFALTGWSRENIVNPYPVYQRYREVASVHRGEPGGDAPDTFYV  
FSYDEVVQVLSSNCFGRGRSLDAAKASVPVPAPAEQKALRAIVENWLVFMDP  
PRHTELRSLLNRSFSPRIVTELPRPRIARIAQELLSRLGQQVDVDLVESFA  
APLPILVISELLGIPEERRAWLRANALALQEASSSRAGRDVDGYARAEVA  
AQEFTEYFREQVRLRRGRAGGDLITILANAQQRGAPVSLDAIVGTCVHLL  
TAGHETTTNSLAKAVLALREHPTVLDELGAEGLTDDAVEEFLRYDPPVQ  
AVTRWAHQDITLGGCDIPRGSRVVALLGSANRDPARFSPDVLVDVRRPAD  
RHLSFGLGIHYCLGATLARAELEIGLQALLDGVPTLGYGTQHVDYADDLV  
FHGPSRLVLVNLGERCK

>CYP162P1 (2526203451) *Salinispora arenicola* CNT799

MGLPSEVDLAEPDLADPDLYAEGDPDAEWAWLRAHRPVYRNPAGATAEFW  
ALTRYRDALQVYRDPSTFSSERGMVLGVDPVAGDPAAGRMLVVTDPPRHP  
KLRRIVSGIFVPRTMHRLEGRVRSLLVDQLLHRVVGAGRCDFVNDVAARL

PVAIIICELLGVPADEQDWMYHLTSTAFGGGDPAGSAEVS AVERAEAYGDI  
LLYYGELAAERRRRPGDDLVTLLVHADLDGEPLDVEDVLVNCTNLIIGGN  
ETTRHAASGGLLALAQRPELWRRRLRETPTAVPTAVEEVLRWTTPGMHVLR  
TATRDTEIGGVPIRAGERVVVWNAANRDEDVFADPQRFIDIDRSPNRHIA  
FGQGGHHCLGAALARLELTILFEEMAKQVTNVRLTGPVRRVRSCVLRGIR  
ALPVELVT

>CYP211C1 (2526203841) *Salinispora arenicola* CNT799

VVDVEELLTRLYSAQGRQDPFPVYADLHARGPIAALPPEPERRRVA AVAV  
GYDLVGAVLRDPEWSKAPPPGWTEQEILRTLQTSMMFINPPDHGRMRHVF  
AGTFTPRRLGALEPVVNRVADELDRMADAGAGGLDFVAEFAYPLPARVM  
AEFIGIPETELDWYRERVVIDAFLDVAGKTPQRLAAANAAGAE LRAFYG  
ELLARRRRTPGEDLISGLVEAVDAGGVELTEDELVSNLIVLFNASFVTTV  
YMLSNGLPVLLAHPEVAAALATDPVLTAGAVDEILRLQAPVHLLARAAPR  
DTVLGGVPI PQGQNVLLLLIAAANRDP AHFPDPDRFDPWRSGPPSLAFGLG  
LHYCLGAAVSRLEGRALPRLLSRFPRLRIMEQPVYSGSLFLRGIDKLSV  
SPGEGSTRE

>CYP107FJ2 (2526204007) *Salinispora arenicola* CNT799

MSETLSTSVLLADAAEQRAWRAKLRGAGPVHRITTSGETGWLIVGHEEA  
RNALVDLRLQGRTATVGHGRMPEDLERALNSHMLNVGPPDHTRLRLRLVS  
AAFTRRRIEQMRPRIQELTDELLDGLAGADEADLVAGLALPLPMRVLVDL  
FGIPAEDCADFNVTKVLTSAGAVDLDRLTAAAGEMVAYLRGLLDRKRQV  
PESDLSALVAVRDGADRLSDELTSMVYLLLTAGYETTVNLIGNGLLNL  
LANPEQLVAFKADPDLLPQVVVEAMRFDSPVQIAVRHSTEPVEIAGQAIP  
SGALILVSLWLWANRDPDRFTEPEAFRVDRQDNPQLGFGYGFHHCIGAPLA  
RMEGTIAIGTVIRRF PALRLAHPAGSLTWRASMVMHGLTALPVHLR

>CYP154M20 (2526204014) *Salinispora arenicola* CNT799

MERCPYVLDRAGRDLHGEAKALRARGPVTLVLELHGGYTAWSVTSYEIAKQ  
LLVDPRI SKNTKETWPEFREGKVPQDWELYTWVAMDNMQTRDGE EHDLRL  
KLVAQAF TTRQVAKVRPMIEDIVDRLLDDLEKVPAGEVVDIKGRYFYPLS  
TILVCDLLGIPEADRAEALHGTVVNARTTNSAE ESEANLHQWQSALSKLV  
ETKRREPGNDITTLIIKAREDEQAPLTDDEVIGSLHLLIGGGTETTSNVL  
CNTLIDL LTHPDQMAMIRSGAVGWEEAWE EEEVRKDGAVGSMFPFCANADI  
EIGGV TIAKGDVLVINYAAAGRDPERYGDTTAEFDITRADKTNLSFGYGR  
HRC LGPALATMEAMISLPALFERFPDLVLAVPRDELKPQGT FVFNGYAEV  
PMLLRS

>CYP248A2 (2526204036) *Salinispora arenicola* CNT799

VLADAVTAFDPTAVDVRRDPYPSYHWLLRHDPVHRGAHQVWYVSRFADVR  
AVLGDERFARTGIRRFWTDLVGPGLLSQIVGDIILFQDEPDHGRLRGVVG  
PAFSPSALRRLEPTIEATVNDLLRPARALGAMDVVADLAYPLALRAVLEL  
LGLPAGDANAVGRWSRAVGRTLDRGATAEDMRRGHAAIAEFADYVERALA  
ERREDGADLLALMLAAHRSQ LMSRNEIVSTVVTFIFTGHETVASQLGNGL  
LSLLDHPEQLELMRRQPHLVPQAVEECLRFDP AVQSNTRQLAADVELHGR  
RLRRDDVVVVLAGAANRDPGRYDRPDELDIRRDVPVSM SFGAGMRYCLGS  
YLARLQLRTALGAMVALPDLRLVCNPNELAYQPR TMFRGLTRLPVAFTPA  
G

>CYP105W2 (2526204043) *Salinispora arenicola* CNT799

MTGYQDRPTGDQPGAPVPSGSTDPGIGAFPLPRRCFFSPPAEYARLRAEH  
SVVRLPMLGGDTAWVVSRRHADVRQVLS DPRMSADRRRP GPFKFAPTTEGQ  
RQASFANFRPPLNWLDPPEHAICRRQIVDEF SVRRVRQSRALVERVVDTH  
LDALTAAPGADLVSTFAYPVSSQVICEVLGVPYGEHEFFERRSTLMFRR  
STPADERARCAREIRDFLDVVVTDKEHRPGDDLLSRLLYRQRRAGGVDHE  
AVVSMAFVLLVAGHVTTSNMLALSVLALLTHPARLARLRAEPPERFPAAVE  
ELLRYFTVVEAATARTATAEVTIGGVTTIAAGEGVVALGQAANRDP RVFEH  
PDEFDPDRDARAHLAFGHGRHICPGQHLARLEMEVALSRLFRRLPGLRLT  
MEVSDLPLKEDSNIFGLYALPVAW

>CYP154M13 (2526204056) *Salinispora arenicola* CNT799

MSTGRPVVLDPTGRDIHGADHLRALGPATLVLPGGVLAWSINSYEVGK  
ALLSAPNVSKSARRHWP AFYNGEIPPDWEMISWVAMDNISTTFGGDHRRL  
RRLTAKAFGSRRAEQVRPMATHMVNTLLDRMADAADAGEVVDLKAAFAYP  
LPGMLVAELIGMSEEARVAAAKVIDMMTATNITPEQAQGVLLGWRDAITD  
LIALKRAQPGDDITSDLIAARDEDGSLLTEQELVDTIFAILGAGSETTIN  
FFDNAITQLLTHPEQLELVKSGQVSWDDVIEEVLRLSPLASLPMRF AVE  
DIQLDGVTTIHRGDPI LINYAALGRDPALHGESAGVFDVTRQHKEHLSFGH  
GAHYCLGAGIARMVAKTGLSALFERFPRMTLAVSAKDLVPYPTFIMNGNR  
QLPVHLSGALTWREGEQSALGRA

>CYP154M21 (2526204057) *Salinispora arenicola* CNT799

MEKCPYVLD RAGSDIHKEASNL RARGPVTLVELHG GYTAWSVTSYEVAKQ  
LLMDPRISKNTKAHWPEFRDGNVPQDWELYTWVAMDNMQTRDGKEHDLRL  
KLVA PAFTGRQAVKSRPIIEEIVNRLLDDLETA PRGQAVDIKARYFYPLS  
TILVCDLLGIAEEDRDVILHGNVNSKTTNTAESEANLHQWQTALGR LV  
ETKRRDPGDDLT TVI IKAGEDEQTPLTDDEVIGSLHLLIGGGTETTANVL  
CHTVVDM LTHPDQLAMVRSGAVSWESAWEEEV RKDGAVGSMPFRCATDDV  
EIGGVTTIAKGDVLV LINYAAAGRDPERYGDAAAEFDITRADKANLSFGYGR  
HRCLGPALATMEAMVALPALFDRFPNLALAVPPNELKPQGT FIFNGYAEV  
PLLLRS

>CYP107AY2 (2526204214) *Salinispora arenicola* CNT799

MTAEPTPIPRSGARLGQEYDQLRKTDGVHQVLLPDASLAWLV TNPEVAAR  
ALADPRLALNRRNSRGGS GFALPPALDANLLNLDAPDHTRLRLRVGP AF  
SPQRVAALRP GIRRAAEHL LDTLVATSGPTDLVTGYCNPLSVQVIADLMG  
VPEAGRTNLRAWTD TMLTSYPPDRDAIRRAVTELHG YVVDLIDIKQQQPG  
DDL LSALVTIEQDGDRLSRDELTS LAFLILFAGYENTANLIASAVLWLLD  
HGGLNVVPSSEAIEGTLRH EPPAPVAIRRFPTEDTII GDVTIPAGDTVLL  
SVAAATR GADGNAARLA FGNPHYCLGAALARVEAEEALTVLARRLPGLT  
LAVPPSQVRWRPTFRTHGPAELLVGW

>CYP211B2 (2526204396) *Salinispora arenicola* CNT799

MDVSEAI AVLISPSGR LDPYPTYEQ LRAHG PVSQTTAGLFVVTGYAEADM  
VLRDPRFVV LDDDLRDDVFPHWQDSPA IKS IARSMLRTNPPDHSRIRRLA  
AGAFTPRRVAAMREV VTAQADELVDEMIRAGRDGARVDFMDMFAYPLPVA  
VICALLGVPAADRSRFRRWAGDLTGILEPEITPEELAGADAGADELRDYF  
TGLIEQRRRAPADDLT TALVQAHDADGDRLSGEELLANLVVLLVAGFETT  
TNLLGNGLV VLLTRPEAAAAALRDEPD LAPGYVDELLRYDSPVQLTTRTVR  
ESVSFAGTELPAGSWLLVLLGAANRDP RRFDPARFDPGRAQSQPLSFGA  
GPHYCLGAGLARLEAQVAFPLLLRRLPELALAGRPSRRTRLTLRGYETLP  
ITVGAVTADRGT PAGVAPGTP

>CYP105J3 (2526204740) *Salinispora arenicola* CNT799

MTDSVAFPQGRVCPHPAPGYRPLAVQRPLAQVTLYDGRRVWAVTTRDLA  
RRLLVDPRISSDRTNPAWPAIVPIVAAAVNDAQQKVLKIATALVGTGPE  
HKAQRKMLIPSFTRRMNALRPMIQEIVDQQLDEMIKSGAPTDLIPAFAS  
AVPVTVLRYRLMGIPDDDHGIFEKLSHQLLAGPNANEAYDQLMGYMSRLIA  
ERRRNPGEGVLDDLLAQHGANDDADHDELVSTLVVQVAGNHGTTGSMIAL  
GLFALLQHPEQLAELRADPSLMPTAVDELLRFLSVPAVTRLAADDIEVE  
GTIIRKGDGVFFITSLINRDTDVHDAPNSLGWHHASAADHLTFGFGAHQC  
LGQSLARITMEIALGALIERLPSRLAVPAEEVPFLPAASLQVIAELPIT  
W

>CYP107EU1 (2526205072) *Salinispora arenicola* CNT799

VTIGQTLPLDVYSPEFTRDPYAIFARLREQAPVCRVTTHRGMSAWMVTRH  
ADVRALLADNRLAKDGNRIGELMPRHSTLTGAATGFFPPGLTNNMVNSDPP  
DHTRLRHLVGREFTGHRVEGLRPRIEEIVDDLLDGVAACGDEADLAETLA  
RRLPIAVIGELLGVPEADRAEFFRWADTLYGGTASPEALGQAYNAIVDYL  
GRLCDAKRDVPADDLLTALVQVSADEDRLSREELVSMALLLLVAGHETTS  
KQISNGVLALLLNPEQLKLLKAQPARTAGAVEELLRFEGPSLSASLRFTT  
EPVEVAGVVIPEGEFVLLSLASGNRDPEKFPDPDRDLITRSTQGNLAMGH  
GIHHCVGAALARLELEIVLSRLVARFPMQLAVEADDLEWLVNSFFRAPL  
HLPVSLRR

>CYP1198B1 (2526205161) *Salinispora arenicola* CNT799

MSGELTDQRTAPGAGGNPLRSLMDHGI RANPYPLFGELREAGPTAVEDGS  
VVLFGHEYEHCSQILRHRDMGSDTSEAPSIKGFVVDDAERAGSSIFFMDQP  
GHGRQRKLVSFSFTPRIVKSFGPQITHIVDGLFEDFRDRGELDVVTDLAY  
PVSIGIICDLFGIPDDERDMLKEWSDDLALSTELPTLGAAIGVLNVFTRD  
EINRFGSVAMAAHAYFADLIHRRRKNPGDDLVSLLATESNGERLTRFEV  
TSVLATLFVAAHESTTNLISGGILALLRNQDQMAVLRENPGITNVVDES  
LRYDPPVHLAARMARATTIGGYDLDPGTIVVVILMAAGNRDPRAYENPDV  
FDVNRKIRNVSLAFGAGAHFCIGSGLAKLEAEIAISAFQRLKHPEVDES  
SLEYRRHIVVRGLEHMKVAFQP

>CYP1005A1 (2562079372) *Salinispora arenicola* CNH718

VSAVLFERSWTKTAGTRWPDVTRVADQSGTEHLVVTRHALVVRQVLTQATY  
RPDNAMEAVTPVPVAALRVLAGHRFRLPPTLANNGGVSHPAIRALVADAL  
HPTKVAAQRPWLTGLVADRVASIRTTLDSGGPVDLYADLTADLPLLVLAR  
LVELPGAPVNAVKKQFARAALFWAPLDADRQLALADEVGRFHQVLRIFA  
DTGGGLAAALRATGHSPDVLVGALFFLLVAGQETTSQFLTLHRLSGEP  
TIRAALRAGSSSVADVVEEGLRLEPPIVTVRRVAAVDSTLGGTTVAAGTS  
VLLWLRAGRDPVVAAPDEFPRPGQSGRRHLAFGAGAHRC LGDQLARME  
AAVVVEQATPLLDGVTVVRPPWYPDNLTFRMPDAFVVRR

>CYP211B2 (2562079684) *Salinispora arenicola* CNH718

MDVSEAI AVLISPSGR LDPYPTYEQ LRAHG PVSRTTAGLFVVTGYAEADM  
VLRDPRFVVLDDDLRDDVFPHWQDSPAIKSIARSMRLTNPPDHSRIRRLA  
AGAFTPRRVAAMREVVTQADELVD EMIRAGRDGARVDFMDMFAYPLPVA  
VICALLGVPAADRSRFRRWAGDLTGILEPEITPEELAGADAGADELRDYF

TGLIEQRRRAPADDLTALVQAHDADGDRLSGEEELLANLVVLLVAGFETT  
TNLLGNGLVLLTRPEAAAAALRDEPD LAPGYVDELLRYDSPVQLTTRTVR  
ESVSFAGTELPA GSWLLVLLGAANRDP RRFDPARFDPWRAQS QPLSFGA  
GPHYCLGAGLARLEAQVAFPLLLRRLPELALAGRPSRRTRLT LRGYETLP  
ITVGAVTADRGT PAGVAPGTP

>CYP125A41 (2562080288) *Salinispora arenicola* CNH718

MTEPRIPAGFDFTDPEVLAHRVPREEFAELRR TAPVWWNAQPRGSAGFDD  
DGYWVVTRYADVMTVSRDS DTYSTRENTAIARLRPD TTREDIEMQRVIML  
NVDPPEHTKLRAIVSRGFTPRAINALRGSLAERA EHIVRDAAVRGVGD FV  
SDVACELPLQAIAELIGVPQHRRKVF DWSNQLIGYDDPAYGTDPLTASA  
ELLAYAMEMAERQRSPSDDLVT KLVNAQIDG EHLTTDEF GFFVMLLAVA  
GNETTRNAITHGMVAF LDNPEQWELFKAERP KSAVEEII RWATPVNVFQR  
TALVDTV LGGRAISAGQRVALFYGSANFDEAVFEDPERFDITRSPNPHLG  
FGGSGAHFCLGANLARLEIELIFNSIADHLPDIRKVAAPQRLRSGWINGI  
RQMPVRYR

>CYP211C1 (2562080437) *Salinispora arenicola* CNH718

VVDVEELLTRL YSAQGRQDPFPVYADLHAQGPIAALPPEPERRRVA AVAV  
GYDLVGAVLRDPEWSKAPPPGWTEQEILRTLQTSMMFINPPDHGRMRHVF  
AGTFTPRRLGALEPVVNRVADELLDRMADAGAGGLDFVAEFAYPLPARVM  
AEFIGIPETELDWYRERVDVIDAFLDVAGKTPQRLAAANAAGAE LRAFYG  
ELLARRRRTPGEDLISGLVEAVDAGGVELTEDELVS NLIVLFNASFVTTV  
YMLSNGLPVLLAHPEVAAALATDPVLTAGAVDEILRLQAPVHLLARAAPR  
DTV LGGVPI PQGQNVLLLI AAANRDP AHFPDPDRFDPWRSGPPSLAFGLG  
LHYCLGAAVSRLEGR LALPRLLSRFPRLRIMEQP VYSGSLFLRGIDKLSV  
SPGEGSTRE

>CYP208A12 (2562080625) *Salinispora arenicola* CNH718

MTLDTITPRVPLGP PRTAALRMLLV MKDRDLGMLTSAAARYGDASRLPVG  
HKALWFFNHPRYAKHVLADNSANYHKGIGLVHARRALGDGLLTSEGD LWR  
KQRKVIQPAFQSRRIAQQAGMIAEEAFALVERLRARAGTG PVELTAELTG  
LTLGVLGRSLLDADLAGFDSIGDSFATVQDQAMFELET LNAVPMWIPLPR  
QIRFRARRRKLQAVVDTLVDGRAGNLAGRVDVLSRLILSARGEADPRVGR  
ERLRDELVTLLLAGHETTASTLGWTL SLIDRHPGVWERLHAEAVEVLGDR  
LPEYDDLRLRLRYTVMVVEEAMRLFPPVWLLPRRALAPDTIGEYRV PANAD  
VVISPYTLHRHPEFWPNPERFDPERFAPGQAADRPRYAYLPFGAGPRFCV  
GNNLGMMEAVFVIALLCRHLRLTGVPGYRLVPEPMLSLRIRGGLPLVVRP  
VS

>CYP244A4 (2562081432) *Salinispora arenicola* CNH718

MSTTTNTELTEAPETNMPVD PGLFDCMPDLIAAARVAPVVRIPYLGRHAW  
VVC DRELVKQAL THPKMGKDITLVPEWMRQPGLMVTAQPDPEYARAMIMS  
DGENHARIRRIHAPVLS PRNTERWGERVADKVEGF LDELSQAGSGGSTEV  
NVVTNYTHKIPLAFISEMLGLPPEAEHRLRGITDIMLYSSDYAARREAIG  
GLFGAVEDWVRNPADLRDGVITGLLAASDGPDAAVTEGEVIVWTLGMIIT  
GYETTGS LISTS LYEAIRRPPHERPKTDEDITAWIEETLRVHPPFP HPTW  
RFPLEDIELGGYLI PKGAPVQVSIAAANRKPGE GADSFDAERRGHGHL SF  
GLGMHYCIGAPLVRLEAQIAVRGFLRRFPQARLSAETAVQWESEWMIRRM  
SVLPVAVLS

>CYP245A7 (2562081436) *Salinispora arenicola* CNH718

MPSATLPRFALTGWSRENIVNPYPVYQRYREVASVHRGEPGGDAPDTFYV

FSYDEVVQVLSSNCFGRGRSLDAAKASVPVPAEQKALRAIVENWLVMFMDP  
PRHTELRSLLNRSFSPRIVTELRPRIARIAQELLSSRLGQQVDVDLVESFA  
APLPILVISELLGIPEERRAWLRANALALQEASSSRAGRDVDGYARAEVA  
AQEFTEYFREQVRLRRGRAGGDLITILANAQERGAPVSLDAIVGTCVHLL  
TAGHETTTNSLAKAVLALREHPAVLDELRGAEGLTTDAVEEFLRYDPPVQ  
AVTRWAHQDTTLGGCDIPGRSRVVALLG SANRDPARFPSPDVLDVRRPAD  
RHLSFGLGIHYCLGATLARAELEIGLQALLDGVPTLGYGTQHVDYADDLV  
FHGPSRLVLVNLGERCK

>CYP105CT1 (2562081631) *Salinispora arenicola* CNH718

MNSPNHMPADRSILTAPTSGCPMALSRGRVGLDVADEISELRDGGRLGRIT  
TAFGQEATLITRYDEVRAQMADSVVFNVAGVPSPPALVDGGFDTESVRRR  
RTVGNLIMLDPPEHTRLRRMVAAWFTTRRVERLRPRVVEIIDAALDEMER  
SGPPVDLVAMFAKTVPITVICELIGVPEELRERYRRRAERAVSASAVSTP  
LDELRLREAGWVSRELIEYHRENPSDDIIGMLLREHGTDSHDDGITDDE  
LVGLANALLIAGHETTTQMLSMGTLALLRHPDQLALLRDDPSIVAGAVEE  
LLRYVGVLHGGFVRVATRDTRLGGHRIHAGELVVPALTAANRDPRLLTG  
DRLDITRPPTSHVAFGHGVHFCIGAPLARMELREAFPALLRRFPGLRLAV  
SDSELEFTQGTTVYSLRGLPVTW

>CYP154M5 (2562081648) *Salinispora arenicola* CNH718

VEQSCPYKLDVTGRDVHAEGEAIRARGPVAQVELPGGVQGSVVTGYQAAR  
QVLADPRFAKDPKKWPAYTSGAIPPNWPLIGWLLMDNMTTNDGADHQRLR  
KLVSHGFTPRQVERTRPLIVKIVNDLLDGLSSAGPDEVVDLKGRAFATPLP  
ARVICDMFGVPEALRASVLRGAQVNVTSISGEEAEANVEQWHRELLELV  
EAKREKPEDDMASLLIAAKEEDGSTLTQEEVVGTLLHMLGAGSETLMNAL  
SYAVLGMLSNPGQYEMVRNGTSSWDDVIEETLRAQAPVAQLPLRYATEDV  
AVGGAVIKAGDPVLMGFTAIGRDPVHGETAGDYDITREDKTHLSFGHGV  
HFCLGAPLARLELKIALPALFERFPHMTLAVRPDQLEPQGTFFIMNGHREL  
PVRLGQPATVLA

>CYP166A4 (2562081915) *Salinispora arenicola* CNH718

MTDAISFELPWARTDKFDPPAVFDALREQRPLARMRYPDGHVGIWVSSYE  
LVREVLGDPRFSHSCAVGHFPVTHQGGQVIPTHPQIPGMFIHMDPPEHTRY  
RRLLTGEFTVRRSRLTGHEGVATEQIEVMREHGAPADLVATFARPLVL  
RVLSGLVLGPLYGERDRYLHAVTLLHDAEADPAEAAAAAYEQAGAYFDEVIE  
RRRRQPEDDLISTLVGDGELTGEELRNIVTLLLFAGYETTESALAVGMFA  
LLHHEDQLARLRADPTKIDAAIEELLRYLTVNQYHTYRTASEDIELHGEV  
INKGDSVTVSLPAANRDPARFACPAELDIDRETSGHVAFGFGIHCQLGQN  
LARVELRAGLSALLRAFPNRLRLAVPADEVPLRLQGSVFAVKNLPVCW

>CYP105BL2 (2562082353) *Salinispora arenicola* CNH718

MSSHSAAAPDPETATPLHTLAPELTFPQFERSTPFDPPQAYTELSGRCPV  
APVSMADGKPSWLITSFEGVRTTLSDPRFSSDMSHPGFNRTGKPVDDLL  
KDTLGAMDGERHRYRRLMTGELTVRRAKAMRPVITQITDEALDQLAAAG  
PGADLVKHVAFVVPVSRVACHLVGIPFSDYELFTGMAATLMDSTSSDDQFA  
ALQNMVSYFDTLVTDREHHDRDDLLGHMVRRYLATGELTRDMLIRLAWTT  
MAAGQETTAHMIIGLVAALLRHPDQLELLRREPHLLPGAVDELMRYLPLI  
QFGIPRVAMDDVEVDGQTVTAGEGVVALPPLANRDPVFERPDELDVRRN  
ARQHLTFGYGPHQCPAHALARLELEVYGRLLERFPTLRLADSDADLKVQ  
DKDIMYRVSELAVTW

>CYP1051A1 (2562082469) *Salinispora arenicola* CNH718

MATDAAITRARTVPAWKALPAVVRDTHRALVDVGNWSDGDVVRVSLGVSR  
PYLVTNPAHVQEVLHERAAIYPRGDDTALWRSVRKLVGDGILAEGLAWAA  
SRRVLAPMFRPARINAMVDTMADAIAGAVDDLHEAATAGTPIDVGRELSR  
VVCSAIMRVFFADRITVRDALRIMKAQETIVTAMAPRILAPLVPWWIPMP  
GDRRFRAAVRSIDDILLPVLRLQAQRQPDDGDDLLSRLVRARADDGRALSE  
KMRDDLVSMAVTTETSTVVLTWLWPLLANHPDVANRLYDEIDRVVGGG  
PVRGDHLAELTYTRMVLDELLRLYPAGWILPRRAATTDVLGGVRINKGAT  
VILSPYVTQRMATAWWGPTAEAFDPERFAAGREAADGRHRYAYYPFGVGMH  
RCLGEHLFNLEAILIVATLLSRFRFALTDTSMPGVKVAASTRPARTVEMI  
LKPVAPVPAR

>CYP107FS2 (2562082753) *Salinispora arenicola* CNH718

MPVPQGEQNLTTTEVFADPKALFATLGSRQPLHRISLPDGMFAVLVTGNRE  
ARQALSDPRLVRSITAAAPELHKYHPLASDDYALSRHMLFADPPDHGRMR  
KLVSTAFTRRRVEQMRPRIQQITDDLIDVIAAKGEADLVETLALPLPIAV  
ISEMLGVPPFADRSEFERHAEVLGTINASSGFDAAIAAGRWFDEYLAELVQ  
QRRREPQDDLI SGMLAAQDKGDRLTDVELRSNALLLLSAGFETTVNLVAN  
GLLALLRHPEAAMAALRSEPNLMTTAVDELRLYDSPVSCVTYHFAQEPVEI  
GGFEIRSGEHVVIAAAAANHDPTVFADPSRLDLRREGSGQILSFSGIHF  
CLGAPLARLEGEIAFGTVLRLRAGLRLAVPTDSLWKASFVLHRLRLRPV  
TFTPDRAFPNIDSVQTV

>CYP105CN1 (2562082754) *Salinispora arenicola* CNH718

MAAPAPQATQSTTPHPPSYPLPRECPYRPSAGTARLRDAGPVSTVRLYDG  
RTAWLVGTAAEARALLADSRVSNRADFPNYPVMDERHLSMRATREMAREE  
EGGFAAALFGMDPPEHTRQRQLLLPRFTVRQVAARRPAIQRIVDEHLDAM  
EANGSPADLVSAFATPVPTMVVCTHLGVPYQDRTRFEPVAVAGLFEPDRAD  
AAMAELTAYLHQLIETKQSEPGDGVIDHLIANHLRPGAIDRAELVAIASA  
ILVAGTVTTSSAIALGTLALLTAPGQYAALVDNPDLPVAVNEILRYLSL  
VEQLARVATEDIEIGGKLIRAGDGIIVSFAAGNLDPNVTTHPDRLDVALP  
PTNHLAFSHGIIHCIGQNLALLELDIAFRALVSRFPTLRLAVPAEQLPY  
FAGDVPRCLACLPVTW

>CYP105CP2 (2562082756) *Salinispora arenicola* CNH718

MTKSMPVQDLPAFFIPRECPYRPSAQHVSLRSGGPMKVRLYNGRTAWLV  
TDSAHARAVLSDYRRVSIKPYHGNYPILLNEEFKVVDSGYADVLFGVDPP  
EHTRQRQMIMPSFTLRRTAVLRPDIQRIVDDKLDEMRRHGAPGDLVTEFA  
QPVPMSVMVSFLLGVPWEDHEEFETPAHKLFVPELAEEATELGAYLERLI  
QKKEQPGGTPGGTGLLDDLIRDHLRAGALSRDELVHIAMAMLVAGTDTT  
NVISLGTALLLDNPQWAAALRDNPDDELIPGAVEEILRYTSLIEAFARVAV  
SDIELNGAVIKEGEGILISSAGVNFDPALAPDPGRFDIRPPRPSFSFSH  
GIHRCPGDNLARLELEIAFRSLVTRMPNLRATAKPIDQIPSNNDGTLQRL  
YELPVVW

>CYP105W2 (2562082870) *Salinispora arenicola* CNH718

MTGYQDRPTGDQPGAPVPSGSTDPGIGAFPLPRRCPPSPPAEYARLRAEH  
PVVRLPMLGGDTAWVVSRAADVQLVLSDPMSADRRRPFGPKFAPTTEGQ  
RQASFANFRPPLNWLDPPEHAICRRQIVDEFVRRVRQSRALVERVVDTH  
LDALTAAPGADLVSTFAYPVPSQVICEVLGVPYGEHEFFERRSTLMFRR  
STPADERARCAREIRDFLDMVVTDKERRPGDDVLSRLLYRQRSAGGVDHE  
AVVSMAFVLLVAGHVTTSNMLALSVLALLTHPARLARLRAEPERFPAAVE



ELLRYFTVVEAATARTTTAEVTIGGVTTIAAGEGVVALGQAANRDP RVFEH  
PDEFDPDRDARAH LAFGHGRHICPGQHLARLEMEVALSRLFRRLPGLRLT  
MEVSDLPLKEDSNIFGLYALPVAW

>CYP248A2 (2562082878) *Salinispora arenicola* CNH718

VLADAVTAFDPTAVDVRRDPYPSYHWLLRHDPVHRGAHQVWYVS RFADVR  
AVLGDERFARTGIRRFWTDLVGPGLLSQIVGDIILFQDEPDHGRLRGVVG  
PAFSPSALRRLEPTIEATVNDLLRPARALGAMDVVADLAYPLALRAVLEL  
LGLPAGDANAVGRWSRAVGRTLDRGATAEDMRRGHAAIAEFADYVERALA  
ERREDGADLLALMLAAHRSQMLMSRNEIVSTVVTFFITGHETVASQLGNGL  
LSLLDHPEQMELMRRQPHLVPQAVEECLRFDPAVQSNTRQLAADVELHGR  
RLRRDDVVVVLAGAANRDPGRYDRPDELDIRRDPVPSMSFGAGMRYCLGS  
YLARLQLRTALGAMVALPDLRLVCSPNELAYQPRTMFRGLTRLPVAFTPA  
G

>CYP107EU1 (2562083303) *Salinispora arenicola* CNH718

VTIGQTLPLDVYSPEFTRDPYAI FARLREQAPVCRVTTHRGMSAWMVTRH  
ADVRALLADSRLAKDGNRIGELMPRHSTLTGAATGFFPGLTTNMVNSDPP  
DHTRLRHLVGREFTGHRVEGLRPRIEEIVDDLLDGVAACGDEADLAETLA  
RRLPIAVIGELLGVPEADRAEFFCWADTLYGGTASPEALGQAYNAIVDYL  
GRLCDAKRDPADDLLTALVQVSADEDRLSREELVSMALLLVAGHETTS  
KQISNGVLALLLNPEQLKLLKAQPARTAGAVEELLRFEGPSLSASLRFTT  
EPVEVAGVVIPEGEFVLLSLASGNRDPEKFPDPDRLDITRSTQGNLAMGH  
GIHHCVGAALARLELEIVLSRLVARFPQMQLAVEADDLEWLVNSFFRAPL  
HLPVSLRR

>CYP105J3 (2562083351) *Salinispora arenicola* CNH718

MTDSVAFPQGRVCPYQPAPGYRPLAVQRPLAQVTLYDGRRVWAVTTRDLA  
RRLLVDPRISSDRNTNPAWPAIVPIVAAAVNDAQQKVLKIATALVGTGPE  
HKAQRKMLIPSFTRRMNALRPMIQEIVDQQLEMIKSGAPTDLVAAFAS  
AVPVTVLYRLMGIPDDDHGIFEKLSHQLLAGPNANEAYDQLMGYMSRLIA  
ERRRNPGEGLVGLDLAQHGANDDVHDDELVSTLVVQVAGNHGTTGSMIAL  
GLFALLQHPEQLAELRADPSLMPTAVDELLRFLSVPDAVTRLAADDIEVE  
GTIIRKGDGVFFITSLINRDTDVHDAPNSLGWHHASAADHLTFGFGAHQC  
LGQSLARITMEIALGALIDRLPSLRLAVPAEEVPFLPAASLQVIAELPIT  
W

>CYP105AB8 (2562083496) *Salinispora arenicola* CNH718

MTETASSRLTDTEFPVQRECPFAEPVEYEQIREQSSIAMVRLTGGEAWW  
ISGHEQGRAVLADRRFSSDRKANFPFVSTDPAIRKRLHAQPLSLISMDG  
AEHTQARRALIGEFTVRRLAALRPRIQQIVDQCIDEMLTDDQHRADLVKT  
LSLPVPSLVICELLGVADHDFFQEHTATLVRRNTASEVRQHSIDELNA  
YLGALIDRKLASPDLLGRQIARQHRDGTFRSSMVSLAFLLLVAGHET  
TANMISLGVVGLLQHPEQLAMIKDDPKTPLAIEELLRFFTIVDSVTSRV  
ATEDVRFGDTTINAGDGVVVSGLSADWDPTVFADPDRLDLERGARHHLAF  
GFGPHQCLGQNLARLELQIVFDTL FHRIPTLRLAAPLDKIPFKTDAAIYG  
ARELPVAW

>CYP107Q4 (2562083569) *Salinispora arenicola* CNH718

MTTTAETS AETIDLFSPEVVADPFGWYARLREETGPTTGTLNIGTMMGGP  
EMWLVTREYEDVRQVLTDPRFLTNPADSPLEDIRAGVFKRLDFPPDLIPW

MANLLNVSDGEDHTRLRKLVSYALTAHRIGKLRPRVEKITADLLDKLAED  
GKDGSPVDLVEEYCYPLPVTVICELVGIDEPDRPHWRAWGDSMATMNGER  
IPTTLVKCIELARELIAKRRAPQDDLVLTALVQAQAEQNRVSDDEIIGI  
LFSLVTAGHQTTTYLIGNSVILLLENPDQLARLKENPSMWPQAVRELQRL  
GPIQFAQPRFPSEDIELGGVTIPRGAPVAPLLLAANTDPRRFPDPNKLI  
DRLAVGSEHGLGFGKGIHRCCLGQHLAYQEAVALQGLFTRFPDLSLAVPR  
EEIPWILRPGFTRTRTLPLKLV

>CYP105G5 (2562083570) *Salinispora arenicola* CNH718

LTIETTETPPADDSLRAPLPRQFMQRDDPSKLPALAAAEQSPVGRSTL  
PDGDPFWMVSGYDEARAVLSDPRFSSDRFRYHPRFKKLSGQLGERLRNDK  
ARAGSFINMDPPEHTRYRKLLTGQFTVRRMRQLTVRIEQIVTEQVDVMLA  
EGNSADLVSAFAVPVPSLMICELLGVRYEDRTEFQRRAGLLQTDLPKQ  
AVENLEAQRAFMQRLVTDKRRTPADDMISGLVHHAGAEPPLTDDDELVGIA  
TLLLFLAGLDTTASMLGLGMFMLLQRPQMAVLRDDPSRIGDAVEELLRYL  
TVVSTGLFRFAKEDVVLGDEHIPAGSTVVVSLMAANRDGRHWPEPETLDV  
TRVRSSHLAFGHGVHQCLGQQRLARIELTVGITELLRRLPNVRLAVPPADV  
PLRNDMITYGVHRLPILWDTP

>CYP105CH1 (2562083621) *Salinispora arenicola* CNH718

VSSLPLPTYPTLRDPADPLLPAPAEYLAIQSEKPIAKVLLPSGRPTWLITG  
HALARQVLTEPCVSVDRRHFNFPYPVPNPDAVVAQVARWTYILLGDDPPL  
HTERRRLLISEFTVRQAQAMRPRIQQLVDFHLEQLIAAGPGADFSKHFAM  
KVPSAVICEMHGVFPADHDYFQERTALQLRRDVPVAAQQAIDELLAYFE  
QLIQEKSSHPGDDVLSRLIVSNRETEAFDHEALVALGLLLLVLVGHETTAN  
TLTLATATMLERPEIAEQLRDTPSLMPSAVEEFLRYFSVAVAVSRIATAD  
LQVGGQLVRAGESMLLVNLTARDGTVFPEPHRLDIRRNARNHLAFSHGI  
HQCMGQNLARVEMQIALDTVLRRLPGLHLVTPFEELPFKYRHLVWGIEEL  
RVAW

>CYP1198B1 (2562084099) *Salinispora arenicola* CNH718

MSGELTDQRTAPGAGGNPLRSLMDHGIRANPYPLFGELREAGPTAVEDGS  
VVLFGHEYEHCSQILRHRDMGSDTSEAPSIKGFVVDDAERAGSSIIFMDQP  
GHGRQRKLVSQSFTPRIVKSFGPQITHIVDGLFEDFRDKGELDVVTDLAY  
PVSIGIICDLFGIPDDERDMLKEWSDDLALSTELPTLGAAIGVLNVFTRD  
EINRFGSVAMAAHAYFADLIHRRRNKPNPGDDLVSLLATESNGERLTRFEV  
TSVLATLFVAAHESTTNLISGGILALLRNQDQMAVLRNPNGLITNVVDES  
LRYDPPVHLAARMARATTIGGYDLDPGTIVVVLMAAGNRDPRAYESPDV  
FDVNRKIRNVSLAFGAGAHFCIGSGLAKLEAEIAISAFQAQRLKNPEVDES  
SLEYRRHIVVRGLEHMKVVSFQP

>CYP105J3 (2515976160) *Salinispora arenicola* CNH646

MTDSVAFFPQGRVCPHQAPAGYRPLAVQRPLAQVTLYDGRRVWAVTTRDLA  
RRLLVDPRISSDRNTNPAWPAIVPIVAAAVNDAQQKVLKIATALVGTGPE  
HKAQRKMLIPSFTFRRMNALRPMIQEIVDQQLEMIKSGAPTDLIPAFAS  
AVPVTVLYRLMGIPDDDHGIFEKLSHQLLAGPNANEAYDQLMGYMSRLIA  
ERRRNPGEVLDLLAQHGANDDADHDELVSTLVVQVAGNHGTTGSMIAL  
GLFALLQHPEQLAELRADPSLMPTAVDELLRFLSVPDVAVTRLAADDIEVE  
GTVIRKGDGVFFITSLINRDTDVHDAPNSLGWHHASAADHLTFGFGAHQC  
LGQSLARITMEIALGALIDRLPSLRLAVPAEEVPFLPAASLQVIAELPIT  
W

>CYP125A41 (2515976314) *Salinispora arenicola* CNH646

MTEPRIPAGFDFTDPEVLAHVRVPREEFAELRRRTAPVWWNAQPRGSAGFDD  
DGYWVVTRYADVMTVSRSDTYSTRENTAIAARLRPDTTREDIEMQRVIML  
NVDPPHEHTKLRAIVSRGFTPRAINALRGSLAERAHIVRDAAVRGVGDFFV  
TDVACELPLQAI AELIGVPQHRRKVFWDWSNQLIGYDDPAYGTDPLTASA  
ELLAYAMEMAEERQSRSPSDDLVTCLVNAQIDGHELTDEFGFFVMLLAVA  
GNETTRNAITHGMVAFLDNPEQWELFKAERP KSAVEEII RWATPVNVFQR  
TALVDTVLGGQAI SAGQ RVALFYGSANFDEAVFEDPERFDITRSPNPHLG  
FGGSGAHFCLGANLARLEIELIFNSIADHLPDIRKVAAPQRLRSGWINGI  
RQMPVRYR

>CYP211C1 (2515976465) *Salinispora arenicola* CNH646

VVDVEELLTRLYSAQGRQDPFPVYADLHAQGPIAALPPEPERRRVA AVAV  
GYDLVGAVLRDPEWSKAPPPGWTEQEILRTLQTSMMFINPPDHGRMRHV  
AGTFTPRRLGALEPVVNRVADELDRMADAGAGGLDFVAEFAYPLPARVM  
AEFIGIPETELDWYRERVDVIDAFLDVAGKTPQRLAANAAGAE LRAFYG  
ELLARRRRTPGEDLISGLVEAVDAGGVELTEDELVSNLIVLFNASFVTTV  
YMLSNGLPVLLAHPEVAAAALATDPVLTAGAVDEILRLQAPVHLLARAAPR  
DTV LGGVPI PQGQNVLLLLIAAANRDP AHFPDPDRFDPWRSGPPSLAFGLG  
LHYCLGAAVSRLEGRALPRLLSRFPRLRIMEQPVYSGSLFLRGIDKLSV  
SPGEGSTRE

>CYP105AB8 (2515976571) *Salinispora arenicola* CNH646

MTETASSRLTDTEFPVQRECPFAEPVEYEQIREQSSIAMVRLTGGGEAWW  
ISGHEQGRAVLADRRFSSDRKANFPFVSTDPAIRKRLHAQPLSLISMDG  
AEHTQARRALIGEFTVRRLAALRPRIQQIVDQCIDEMLTDDQHCADLVKT  
LSLPVPSLVICELLGVADHDFQEHATLVRRNTASEVRQHSIDELNA  
YLGALIDRKLASPDLLGRQIARQHRDGTFRSSMVSLAFLLLVAGHET  
TANMISLGVVGLLQHPEQLAMIKDDPKTPLAIEELLRFFTIVDSVTSRV  
ATEDVRFGDTTINAGDGVVVSGLSADWDPTVFADPDRDLERGARHHHLAF  
GFGPHQCLGQNLARLELQIVFDTLFHRIPTLRLAAPLDKIPFKTDAAIYG  
ARELPVAW

>CYP162P1 (2515977027) *Salinispora arenicola* CNH646

MGLPSEVDLADPDLYAEGDPDAEWAWLRAHRPVYRNPAGTTAEFWALTRY  
RDALQVYRDPSTFSSSERGMVLGVDPVAGDPAAGRMLVVTDPPRHPKL RRI  
VSGIFVPRMTMRLEGRVRS LVDQLLHRVVDGAGRCDFVNDVAARLPVAII  
CELLGVPADEQDWMYHLTSTAFGGGDPAGSAEVS AVERAEAYGDILLYG  
ELAAERRRRPGDDLVTLLVHADLDGEPLDVEDVLVNCTNLIIGNETTRH  
AASGGLLALAQRP ELWRRRLRETPTAVPTAVEEVLRWTTPGMHVLR TATRD  
TEIGGVPIRAGERVVVWNAANRDEDVFADPQRFDIDRSPNRHIAFGQGG  
HHCLGAALARLELTILFEEMAKQVTNVRLTG PVRVRVRSVLRGIRALPVE  
LVT

>CYP208A12 (2515977582) *Salinispora arenicola* CNH646

MTLDTITPRVPLGPRTAALRMLLVMKRDRLGMLTSAAARYGDASRLPVG  
HKALWFFNHPRYAKHVLADNSANYHKIGLVHARRALGDGLLTSEGDLWR  
KQRKVIQPAFQSRRIAQQAGMIAEEAFALVERLRARAGAGPVELTAELTG  
LTLGVLGRSLLDADLAGFDSIGDSFATVQDQAMFELET LNAVPMWIPLPR  
QIRFRARRRKLQAVVDTLVDGRAGNLADRVDVLSRLILSARGEADPRVGR  
ERLRDELVTLLLAGHETTASTLGWTL SLIDRHPGVWERLHAEAVEVLGDR  
LPEYDDLRLRLRYTVMVVEEAMRLFPPVWLLPRRALAPDTIGEYRVPANAD

VVISPYTLHRHPEFWPNPERFDPERFAPGQAADRPRYAYLPFGAGPRFCV  
GNNLGMMEAVFVIALLCRHLRLTGVPGHRLVPEPMLSLRIRGGLPLVVRP  
VS

>CYP107Q4 (2515978128) *Salinispora arenicola* CNH646

MTTTAETSAETIDLFSPEVVADPFGWYARLREETGPTTGTNLNIGTMMGGP  
EMWLVTTRYEDVRQVLTDPRFLTNPADSPLEDIRAGVFKRLDFPPDLIPW  
MANLLNVSDGEDHTRLRKLVSYALTAHRIGKLRPRVEKITADLLDKLAED  
GKDGSPVDLVEEYCYPLPVTVICELVGIDEPDRPHWRAWGDSMATMNGER  
IPTTLVKCIELARELIAKRRAE PQDDLVTALVQAQAE DQNRVSDDEIIGI  
LFSLVTAGHQTTTYLIGNSVILLLENPDQLARLKENPSMWPQAVRELQRL  
GPIQFAQPRFPSEDIELGGVTIPRGAPVAPLLLAANTDPRRFPDPNKLI I  
DRLAVGSEGLHGFKGKIHRC LGQHLAYQEA E VALQGLFTRFPDLSLAVPR  
EEIPWILRPGFTRTRTLPLKLV

>CYP105G5 (2515978129) *Salinispora arenicola* CNH646

LTIIETTETPPADDSLAPLPRQFMQRDDPSKLPALAAAEQSPVGRSTL  
PDGDPFWMVSGYDEARAVLSDRFSSDRFRYHPRFKKLSGQLGERLRNDK  
ARAGSFINMDPPEHTRYRKLLTGQFTVRRMRQLTVRIEQIVTEQVDVMLA  
EGNSADLVSAFAVPVPSLMICELLGVRYEDRTEFQRRAGLLQTDLPKQ  
AVENLEAQRAFMQRLVTDKRRTPADDMISGLVHHAGAEPPLTDDDELVGIA  
TLLLFAGLDTTASMLGLGMFMLLQRP EQMAVLRDDPSRIGDAVEELLRYL  
TVVSTGLFRFAKEDVVLGDEHI PAGSTVVVSLMAANRDGRHWPEPETLDV  
TRVRSSHLAFGHGVHQCLGQQ LARIELTVGITELLRRLPNVRLAVPPADV  
PLRNDMITYGVHRLPILWDTP

>CYP1051A1 (2515978150) *Salinispora arenicola* CNH646

MATDAAITRARTVPAWKALPAAVRDTHRALVDVGNWSDGDVVRVSLGVSR  
PYLVTNPAHVQEV LHERAAIYPRGDDTALWRSVRKLVGDGILAE GDAWAA  
SRRVLAPMFRPARINAMVDTMADAIAGAVDGLHGAATAGTPI DVGRELSR  
IVCSAIMRVFFADRITVRDALRIMKAQETIVTAMAPRILAPLPWWIPMP  
GDRRFRAAVRSID DILLPVLRQAQRQPDDGDDL SRLVRARADDGQALSE  
KMRDDLVSMVAVTTETSTVVLTWLWPLL ANHPDVANRLYDEIDRVVGGG  
PVRGDHLAELTYTRMVLD ELLRLYPAGWILPRRAATTDVLGGVRINKGAT  
VILSPYVTQRM TAWWGPTAEAFDPERFAAGREAADGRHRYAYYPFGVGMH  
RCLGEHLFNLEAILIVATLLSRFRFALTDTSMPGVKVA ASTRPARTVEMV  
LKPVAPVPAR

>CYP107AX14P (2515978416) *Salinispora arenicola* CNH646

VTSPPHVAFGHLLLRDPHGQYNALRGQAPVHHIRTPDGAPAWLVMRYHDV  
QAALTDLRLSVDKRFSDTDGEHGSSLPPELDAHLLNRDPPDHTRLRRLAA  
AAFTPRRVADQAPAVATIVDALLDGIADQDQAELIGALASPLPLQVMHEL  
LGLPTQTSVDFRNWNTNLLSADANQPAQSR SAMATMRFLMGQLARKRAQ  
PGDDL LTGLLAARD DDDRFTDDELLAMVFLLMFAGYDNTAALIGNVTHAL  
LTDAGLHDAVRAGSVLDL SVVDEVLRWNPSFPLAVRRFAREPVTPSRQAI  
ASGSAWPARTATPHSSPNPTN

>CYP244A4 (2515978750) *Salinispora arenicola* CNH646

MSTTTNTELTEAPETNMPVDPGLFDCMPDLIAAARVAPVVRIPYLGRHAW  
VVCDELVKQAL THPKMGKDIALVPEWMRQPGLMVTAQPDPEYARAMIMS  
DGENHARIRRIHAPVLSRPNTERWGERVADKVEGF LDELSQAGSGGSTEV

NVVTNYTHKIPLAFISEMLGLPPEAEHRLRGITDIMLYSSDYAARREAIG  
GLFGAVEDWVRNPADLRDGVITGLLAASDGPDAAVTEGEVIVWTLGMIIT  
GYETTGSLISTSLYEAIRRPPHERPKTDEDITAWIEETLRVHPPFPHTW  
RFPLEDIELGGYLIPKGAPVQVSIAAANRKPGEADSFDAERRGHGHLSE  
GLGMHYCIGAPLVRLEAQIAVRGFLRRFPQARLSAETAVQWESEWMIRRM  
SVLPAVLS

>CYP245A7 (2515978754) *Salinispora arenicola* CNH646

MPSATLPRFALTGWSRENIVNYPYPVYQRYREVASVHRGEPGGDAPDTFYV  
FSYDEVVQVLSSNCFGRGRSLDAAKASVPVPAEQKALRAIVENWLVFMDP  
PRHTELRSLNRSFSPRIVTELRPRIARIAQELL SRLGQQVDVDLVESFA  
APLPILVISELLGIPEERRAWLRANALALQEASSSRAGRVDVGYARAEVA  
AQEFTEYFREQVRLRRGRAGGDLITILANAQERGAPVSLDAIVGTCVHLL  
TAGHETTTNSLAKAVLALREHPAVLDELRGAEGLTTDAVEEFLRYDPPVQ  
AVTRWAHQDCTLGGCDIPRGSRVVALLGSANRDPARFSPDVLVDVRRPAD  
RHLSFGLGIHYCLGATLARAELEIGLQALLDGVPTLGYGTQHVDYADDLV  
FHGPSRLVLVNLGERCT

>CYP166A4 (2515979022) *Salinispora arenicola* CNH646

MTDAISFELPWARTDKFDPPAVFDALREQRPLARMRYPDGHVGWIVSSYE  
LVREVLGDPRFSHSCAVGHFPVTHQGQVIPTHPQIPGMFIHMDPPEHTRY  
RRLLTGEFTVRRTSRLTGHEGVATEQIEVMREHGAPADLVATFARPLVL  
RVLSGLVGLPYGERDRYLHAVTLLHDAEADPAEAAAAAYEQAGAYFDEVIE  
RRRRQPEDDLISTLVGDGELTGEELRNIVTLLLFAGYETTESALAVGMFA  
LLHHEDQLARLRADPTKIDAAIEELLRYLTVNQYHTYRTASEDIELHGEV  
INKGDSVTVSLPAANRDPARFACPAELDIDRETSGHVAFGFGIHQCLGQN  
LARVELRAGLSALLRAFPNRLRLAVPADEVPLRLQGSVFAVKNLPVCW

>CYP105BL2 (2515979296) *Salinispora arenicola* CNH646

MSSHSAAPDPETATPLHTLAPELAFPPQFERSAPFDPPQAYTELSGRCPV  
APVSMADGKPSWLITSFEGVRTTSLDPHFSSDMSHPGFPNRTGKPVDDL  
KDTLGAMDGERHRYRRLMTGELTVRRAKAMRPVITQITDEALDQLAAAG  
PGADLVKHVAFVVPSPRVACHLVGIPLSYELFTGMAATLMDSTSSDDQFA  
ALQNMVSYFDTLVTDREHHDRDDLGHMVRRYLATGELTRDMLIRLAWTT  
MAAGQETTAHMIGLGVAALLRHPDQLELLRREPHLLPGAVDELMRYLPLI  
QFGIPRVAMDDVEVDGQTVTAGEGVVALPPLANRDPVFERPDELDVRRN  
ARQHLTFGYGPHQCPAHALARLELEVYGRLLERFPTLRLADSDADLKVQ  
DKDIMYRVSELAVTW

>CYP107FS2 (2515979781) *Salinispora arenicola* CNH646

MPVPQGEQNLTEVFADPKALFATLGSRQPLHRISLPDGMFAVLVTGNRE  
ARQALSDPRLVRSITAAPELHKYHPLASDDYALSRHMLFADPPDHGRMR  
KLVSTAFTRRRVEQMRPRIQQITDDLIDVIAAKGEADLVETLALPLPIAV  
ISEMLGVFPFADRSEFERHAEVLTGINASSGFDAAIAAGRWFDEYLAGLVQ  
QRRREPQDDLISGMLAAQDKGDRLTDVELRSNALLLSAGFETTVNLIAN  
GLLALLRHPAEMAALRSEPNLMTTAVDELRLRYDSPVSCVTYHFAQEPVEI  
GGFEIRSGEHVVIAAAAANHDPTVFAPSRDLRREGSGQILSFSGIHF  
CLGAPLARLEGEIAFGTVLRLRAGLRLAVPTDSLWKASFVLHRLRLPV  
TFTPDRDPNPIDSVHTV

>CYP105CN1 (2515979782) *Salinispora arenicola* CNH646

MAAPAPQATPSTTPHPPSYPLPRECPYRPSAGTAHLRDAGPVSTVRLYDG  
RTAWLVGTGAEEARALLADSRVSNRADFPNYPVMDERHLSMRATREMAREE  
EGGFAAALFGMDPPEHTRQORQLLLPRFTVRQVAARRPAIQRIVDEHLDAM  
EANGSPADLVSAFATPVPTMVVCTHLGVPYQDRTRFEPVAGLFEFDRAD  
AAMAELTAYLHQLIETKQSEPGDGVIDHLIANHLRPGAIDRAELVAIASA  
ILVAGTVTTSSAIALGTLALLTAPGQYTALVDNPDLPVGA VNEILRYLSL  
VEQLARVATEDIEIGGKLIRAGDGIIVSFAAGNLDPNVTTHPDRLDVALP  
PTNHAFSHGIIHHCIGQNLALLELDIAFRALVSRFPTLRLAVPAEQLPY  
FAGDVPRLACLPTW

>CYP105CP2 (2515979784) *Salinispora arenicola* CNH646

MTKSMFPVQDLPAFPPIPRECPYRPSAQHVSLRSGGPMAKVRLYNGRTAWLV  
TDSA HARAVLS DYRRVSIKPYHGNYP LLNEEF EKVVDSGYADVLFGVDP  
EHTRQORQMIMPSFTLRRTAVLRPDIQRI VDDKLDEM MRHGAPGDLVTEFA  
QPVP SMVISFLLGVPWEDHEEFETPAHKLFPVPELAE EATTEL GAYLERLI  
QKKEQPGGTGGTGLLDDLI RDHLRAGALS RDELVHIAMAMLVAGTDTT  
NVISLGLTALLDNPDQWAALRDNPD ELIPGAVEEILRYTSLIEAFARVAV  
SDIELNGAVIKEGEGILISSAGVNFDPALAPDPGRFDIRRPPRPSFSFSH  
GIHRCPGDNLARLELEIAFRSLVTRMPNLRTAKPIDQIPSNNDGTLQRL  
YELPVVW

>CYP154M21 (2515980120) *Salinispora arenicola* CNH646

MEKCPYVLDRAGSDIHKEASNL RARGPVTLVELHGGYTAWSVTSYEVAKQ  
LLMDPRISKNTKAHWPEFRDGNVPQDWELYT WVAMDNMQTRDGKEHDLR  
KLVA PAFTGRQAVKSRPIIEEIVNRLLDDLETA PRGQAVDIKARYFYPLS  
TILVCDLLGIAEEDRDVILHGNV VNSKTTNTAE ESEANLHQWQTALGR LV  
ETKRDPGDDLTTV I IKAGED EQTPLTDDEVIGSLHLLIGGGTETTANVL  
CHTVVDMLTHPDQLAMVRSGAVSWESAWEE EVRKDGAVGSMPPFRCATDDV  
EIGGV TIAKGDVLV L INYAAAGRDPERYGDAAAEFDITRADKANLSFGYGR  
HRCLGPALATMEAMVALPALFDRFPNLALAVPPNELKPGGT FIFNGYAEV  
PLLLRS

>CYP154M13 (2515980121) *Salinispora arenicola* CNH646

MSTGRPVVLDPTGRDIHG EADHLRALGPATLVELPGGVLAWSINSYEVGK  
ALLSAPNVSKSARRHWPAFYNGEIPPDWEMISWVAMDNISTTFGGDHRRL  
RRLTAKAFGSRRAEQVRPMATHMVNTLLDRMADAADAGEVVDLKA AFAYP  
LPGMLVAELIGMSEEARVAAAKVIDMMTATNITPEQAQGVLLGWRDAITD  
LIALKRAQPGDDITS DLIAARDEDGSLLTEQELVD TIFAILGAGSETTIN  
FFDNAITQLLTHPEQLELVKSGQVSWDDVIEEVLRL ESPLASLPMRFAVE  
DIQLDGVTIHRGDPILIN YAAALGRDPALHGESAGVFDVTRQHKEHLSFGH  
GAHYCLGAGIARMVAKTGLSALFERFPRMTLAVSAKDLVPYPTFIMNGNR  
QLPVHLSGALTWREGEQSALGRE

>CYP105W2 (2515980134) *Salinispora arenicola* CNH646

MTGYQDRPTGDQPGAPVPSGSTDPGIGAFPLPRRC PFSPPAEYARLRAEH  
PVVRLPMLGGDTAWVVS RHADV RQVLS DPRMSADRRRPGFPKFAPTTEGQ  
RQASFANFRPPLNWLDPPEHAICRRQIVDEF SVRRVRQSRALVERVVDTH  
LDALTAAPGADLVSTFAYPVPSQVICEVLGVPYGEHEFFERRSTLMFRR  
STPADERARCAREIRDFLDVVVTDKEHRPGDDVLSRLLYRQRRAGGVDHE  
AVVSMAFVLLVAGHVTTSNM LALSVLALLTHPARLARLRAE PERFFAAVE  
ELLRYFTVVEAATARTATAEVTIGGV TIAAGEGVVAVGQAANRDP RVFEH  
PDEFDPDRDARAHLAFGHGRHICPGQH LARLEMEVALSRLFRRLPGLRLT

MEVSDLPLKEDSNIFGLYALPVAW

>CYP248A2 (2515980142) *Salinispora arenicola* CNH646

VLADAVTAFDPTAVDVRRDPYPSYHWLLRHDPVHRGAHQVWYVSRFADVR  
AVLGDERFARTGIRRFWTDLVGPGLLSQIVGDIILFQDEPDHGRLRGVVG  
PAFSPSALRRLEPTIEATVNDLLRPARALGAMDVVADLAYPLALRAVLEL  
LGLPAGDANAVGRWSRAVGRTLDRGATAEDMRRGHAAIAEFADYVERALA  
ERREDGADLLALMLAAHRSQLMRNEIVSTVVTFTFTGHETVASQLGNGL  
LSLLDHPEQLELVRRQPHLVPQAVEECLRFDPVQSNTRQLAADVELHGR  
RLRRDDVVVVLAGAANRDPGRYDRPDELDIRRDVPSPMSFGAGMRYCLGS  
YLARLQLRTALGAMVALPDLRLVCNPNELAYQPRTMFRGLTRLPVAFTPA  
G

>CYP154M20 (2515980164) *Salinispora arenicola* CNH646

MERCPYVLDRAGRDLHGEAKALRARGPVTLEVELHGGYTAWSVTSYEIAKQ  
LLVDPRI SKNTKETWPEFREGKVPQDWELYTWVAMDNMQTRDGEEHDLRL  
KLVAQAFRTTRQVAKVRPMIEDIVDRLLDDLEKVPAGEVVDIKGRYFYPLS  
TILVCDLLGIPEADRAEALHGTVVNARTTNSAESEANLHQWQSALSKLV  
ETKRREPGNDITTLIIKAREDEQAPLTDDEVIGSLHLLIGGGTETTSNVL  
CNTLIDLTHPDQMAMIRSGAVGWEEAWEVEVRKDGAVGSMPPFRCANADI  
EIGGVTIKAGDLVLINAAAAGRDPERYGDTTAEFDITRADKTNLSFGYGR  
HRCCLGPALATMEAMISLPALFERFPDLVLAVPRDELKPQGTFFVNGYAEV  
PMLLRS

>CYP107FJ2 (2515980171) *Salinispora arenicola* CNH646

MSETLSTSVLLADAAEQRAWRAKLRGAGPVHRITTSGETGWLIVGHEEA  
RNALVDLRLQGRATATVGHGRMPEDLERALNSHMLNVGPPDHTRLRLRLVS  
AAFTRRRIEQMRPIQELTDELLDGLAGADEADLVAGLALPLPMRVLVDL  
FGIPAEDCADFNVTWKVLTSAGAVDLDRLTAAAGEMVAYLRGLLDRKRQV  
PESDLLSALVAVRDGADRLSDELTSMVYLLLTAGYETTVNLIGNGLLNL  
LANPEQLVAFKADPDLLPQVVEEAMRFDSPVQIAVRHSTEPVEIAGQAIP  
SGALILVSLWANRDPDRFTEPEVFRVDRQDNPQLGFGYGFHHCIGAPLA  
RMEGTVAIGTVIRRFAPALRLAHPASSLTWRASMVMHGLTALPVHLR

>CYP211B2 (2515980211) *Salinispora arenicola* CNH646

MDVSEAI AVLISPSGRLDPYPTYEQ LRAHG PVSQT TAGLFVVTGYAEADM  
VLRDPRFVVLDLDDLRDDVFPHWQDSPAIXIARSMLRTNPPDHSRIRRLA  
AGAFTPRRVAAMREVVTAQADELVDEMIRAGRDGARVDFMDMFAYPLPVA  
VICALLGVPAADRSRFRRWAGDLTGILEPEITPEELAGADAGADELRDYF  
TGLIEQRRRAPADDLTALVQAHDADGDRLSGEELLANLVLLVAGFETT  
TNLLGNGLVLLTRPEAAAAALRDEPD LAPGYVDELLRYDSPVQLTTRTVR  
ESVSFAGTELPAGSWLLVLLGAANRDPRRFPDPARFDPGRAQSQPLSFGA  
GPHYCLGAGLARLEAQVAFPLLLRRLPELALAGRPSRRTRLTLRGYETLP  
ITVGAVTADRGTAGVAPGTP

>CYP125G6 (2515980273) *Salinispora arenicola* CNH646

VPTLLNEHVSYDGAAIAIVDS DGATSWIRLAERVNRVHLLRAHGLDTGD  
RLACVTGNRRETFEVLLAALHTGVTVPVNWHLTVTEIGHILSDSGSRVV  
ITEELHVKA VAAAADGTAGPVAGLV LGDREVEGF AA VEPL LAAA SPAEPE  
QVCGATMLYTS GTTGRPKGVVNNLFVTGAPYARVGRLCDYARSVLGVPR

RERMLLDGPWYHSSQLFFALLSLLQGSRLVIRPYFDPAATLKTIDDHRIT  
VTHLVPTQLVRLLRVDALTRQMFSGASLRRVWHGGGPCPPEVKRSMIDWW  
GPVLVEYYGATEGGVVTLIDSAEWLARPGSVGRAVPPSEVVVVDDGGQPV  
AAGQTGQVFFRRRTGNRFHYHNAPEKTQAAYLAPDTFTYGEVGHVDEDGY  
LFLTGRAQDMIVSGGVNVYPAEVEAALLRHPVVRDAAVIGVADDEFGERV  
VGIVVPETAVIDPDDLATHLDAHCRVSLAGFKVPRTYRVVESLPRDETGKL  
RKDALRSKFGWLSGAAMTVPRPATGQPTAHRPDIAHPTTYVSGVPHDEFA  
RRRRDEFPVGWVAEPVLTRHTAAGRTATRGSGFWAVTRYEDVVAASRRVTD  
FSSAAKGAFITDPRTPADLQQARQLLVNMDDPHHARLRKLVTSVFTPRAV  
RGLLASIDAHAAALVAKVVAAGEFDVVTDLAAELPLLVLADLLGVPKQDR  
ALLYGWSNHLVGFDDPDFGGGDI DAYRTAMAEAFQYALNLGVERRARPTD  
DLVSLLANAEVDGTRLTDREFCNFWLLLVVAGNETTRHLIAGTMQALTEH  
PGECARLVEGRVPMESAVEELLRWVTPIMQFRRTATRDTEIGGQAVTAGE  
KVVLYYTSANRDATVFAEPDRLDLGRTPNRQLSFGIGPHYCLGAHLARAE  
LTALLRVMSPHLGLSLQLTGPVSRLASNFVNGVKAMPAVIGSR

>CYP154M15 (2515980298) *Salinispora arenicola* CNH646

MNDKCPFAALDVTGQDLHGEEARLREQGPAVLVELPGGVKAWSINRYEVI  
RELLMDRRVTKNARKHWPFIKGEIPPDWEMISWVAMDNMVTAYGKDHVR  
LRKLVGRAFTQRRADALRPQVVALSTKLDDLGATPPGEVVDLRERFAYP  
LPAMLVASLIGMSEAALAACSKVIDMMVHTNVSPEEAQAVLRGWRAAMAD  
LIESKRRTPGEDITDITAREEDGSRLSEAELADTIFAILGAGSETTIN  
FFDNAITALLSRPGQLQLLRTGAVTWDDVIDEVLRVESPLAHLPLRYAVE  
DIELDGVITIPQGDPILVNYYAAGRDPALHGGTADEFDLARGDKTHLSFGY  
GPHYCLGAGIARMVATIGLSMLFERFPDLSLAVPVTELKRLPTFIMNGHQ  
TLPVRLTAHAR

>CYP1005A1 (2515980585) *Salinispora arenicola* CNH646

VSAVLFRSWTKTAGTRWPDVTRVADQSGTEHLVVTRHALVRQVLTQATY  
RPDNAMEAVTPVPVAALRVLAGHRFRLPPTLANNGGASHPAIRALVADAL  
HPTKVAAQRPWLTGLVADRVATIRTTLDSGGPVDLYADLTADLPLLVLAR  
LVELPDAPVNAVQKFARAALFWAPLDADRQLALADEVGRFHQVLRFA  
DTGGGLAAALRATGHSPDVLVGALFFLLVAGQETTSQFLTLLHHRVSGEP  
TIRAALRAGSSSVADVVEEGLRLEPPIVTVRRVAAVDSTLGGTTVAAGTS  
VLLWLARAGRDPVVAAPDEFPRPGQRGSRRLAFGAGAHRCCLGDQLARME  
AAVVVEQATPLLDGVTVVRPPWYPDNLTFRMPDAFVVRR

>CYP107AY13 (2515980797) *Salinispora arenicola* CNH646

MTAELTPIPRSSARLGQEYDQLRKTDGVHQVLLPDASLAWLVTNPDVAAR  
ALADPRLALNRRNSRGGWSGFALPPALDANLLNLDAPDHTRLRRLVGPAF  
SPQRVAALRPGIRRAAEHLDTLVATSRPTDLVTGYCNPLSVQVIADLMG  
VPEAGRTNLRAWTDMTLSYPPDRDAIRQAVTELHGYYVDLIDLKQQQPG  
EDLLSVLVTTIEQDGDRLTRDELTSLAFLILFAGYENTANLIASAVLWLLD  
HGGLNVVPISEAIEATLRHEPPAPVAIRRFPTEDIIIGGLTIPAGDTVLL  
SIAAATRGADGNAARLAFGNPHYCLGAALARIEAEEALTVLARRLPGLT  
LAVPPAQVRWRPTFRTHGPAELLVGW

>CYP245A7 (2517943078) *Salinispora arenicola* CNY280

MPSATLPRFALTGWSRENIVNPYPVYQRYREVASVHRGEPGGDAPDTFYV  
FSYDEVVQVLSSNCFGRGRSLDAAKASVPVPAEQKALRAIVENWLVMFDP  
PRHTELRSLLNRSFSPRIVTELPRPRIARIAQELLSRLGQQVDVDLVESFA  
APLPILVISELLGIPEERRAWLRANALALQEASSSRAGRVDVGYARAEVA  
AQEFTEYFREQVRLRRGRAGGDLITILANAQQRGAPVSLDAIVGTCVHLL



TAGHETTTNSLAKAVLALREHPTVLDELGAEGLTDDAVEEFLRYDPPVQ  
AVTRWAHQDQDTTLGGCDIPRGSRVVALLGSANRDPARFPSPDVLDVRRPAD  
RHLSFGLGIHYCLGATLARAELEIGLQALLDGVPTLGYGTQHVDYADDLV  
FHGPSRLVLVNLGERCK

>CYP244A4 (2517943082) *Salinispora arenicola* CNY280

MSTTTNTELTEAPETNMPVDPGLFDCMPDLIAAARVAPVVRIPYLGRHAW  
VVCDELVKQALTHPKMGKDIALVPEWMRQPGMLMVTAPDPPEYARAMIMS  
DGENHARIRRIHAPVLSPRNTERWGERVADKVEGFLDELSQAGSGGSTEV  
NVVTNYTHKIPLAFISEMLGLPPEAEHRLRGITDIMLYSSDYAARREAIG  
GLFGAVEDWVRNPADLRDGVITGLLAASDGPDAAVTEGEVIVWTLGMIIT  
GYETTGSLISTSLYEAIRRPPHERPKTDEDITAWIEETLRVHPPFPHPPTW  
RFPLEDIELGGYLIPKGAPVQVSIAAANRKPGEGADSFDAERRGHGHLSE  
GLGMHYCIGAPLVRLEAQIAVRGFLRRFPQARLSAETAVQWESEWMIRRM  
SVLPAVLS

>CYP105CP2 (2517943299) *Salinispora arenicola* CNY280

MTKSMPVQDLPAFPIPRECPYRPSAQHVSLRSGGPMKVRLYNGRTAWLV  
TDSAHAARVLSYDYYRVSIPKPYHGNYPILLNEEFKVVDSGYADVLFVDP  
EHTRQRMIMPSFTLRRTAVLRPDIQRIVDDKLDEMHRGAPGDLVTEFA  
QPVPSMVISFLLGVPWEDHEEFETPAHKLFVPELAEEATTELGAYLERLI  
QKKEQPGGTGGTGLLDDLRDHLRAGALSRDELVHIAMAMLVAGTDTT  
NVISLGLTALLDNDPQWAALRDNDELIPGAVEEILRYTSLIEAFARVAV  
SDIELNGAVIKEGEGILISSAGVNFDPALAPDPGRFDIRRPPRPSFSFSH  
GIHRCPGDNLARLELEIAFRSLVTRMPNLRATAKPIDQIPSNNDGTLQRL  
YELPVVW

>CYP105CN1 (2517943301) *Salinispora arenicola* CNY280

MAAPAPQATTSTTPHPPSYPLPRECPYRPSAGTAHLRDAGPVSTVRLYDG  
RTAWLVGTAAEARALLADSRVSNRADFPNYPVMDEHLSMRATREMAREE  
EGGFAAALFGMDPPEHTRQRLQLLPRFTVRQVAARRPAIQIRIVDEHLDAM  
EANGSPADLVSAFATPVPTMVVCTHLGVYPYQDRTRFEPVAGLFEPRAD  
AAMAELTAYLHQLIETKQSEPGDGVIDHLIANHLRPGAIDRAELVAIASA  
ILVAGTVTTSSAIALGLTALLTAPGQYAALVDNPDLPVPGAVNEILRYLSL  
VEQLARVATEDIEIGGKLIRAGDGIIVSFAAGNLDPNVTTHPDRLDVALP  
PTNHLAFSHGIIHCIGQNALLELDIAFRALVSRFPTLRLAVPAEQLPY  
FAGDVPRLACLPTVW

>CYP107FS2 (2517943302) *Salinispora arenicola* CNY280

MPVPQGEQNLTEVFADPKALFATLGSRQPLHRISLPDGMFAVLVTGNRE  
ARQALSDPRLVRSITAAAPELHKYHPLASDDYALSRHMLFADPPDHGRMR  
KLVSTAFTRRRVEQMRPIQQITDDLIDVIAAKGEADLVETLALPLPIAV  
ISEMLGVFPFADRSEFERHAEVLTGINASSGFDIAAAGRWFDEYLAGLVQ  
QRRREPQDDLISGMLAAQDKGDRLTDVELRSNALLLSAGFETTVNLIAN  
GLLALLRHPEAMAALRSEPNLMTTAVDELRLRYDSPVSCVTYHFAQEPVEI  
GGFEIRSGEHVVIAAAAANHDPTVFADPSRLDLRREGSGQILSFSGIHF  
CLGAPLARLEGEIAFGTVLRRLAGRLAVPTDSLWKASFVLHRLERLPV  
TFTPDRDPNLIDSVHTV

>CYP125G6 (2517943341) *Salinispora arenicola* CNY280

VPTLLNEHVSYDGAIAIVDSGDGATSWIRLAERVNVRWVHLLRAHGLDTGD  
RLACVTGNRRRETFFEVLLAALHTGVTVPVNVHLLTVTEIGHILSDSGSRVV  
ITEELHVKAFAAAADGTAGPVAGLVLDREVEGFAAVEPLLAASPAEPE  
GQVCGATMLYTSGETGRPKGVVNNLFVTGAPYARVGRLCDYARSVLGVPR  
RERMLLDGPWYHSSQLFFALLSLLQGSRLVIRPYFDPAATLKTIDDHRIT  
VTHLVPTQLVRLLRVDALTRQMFSGASLRRVWHGGGPCPPEVKRSMIDWW  
GPVLVEYYGATEGGVVTLIDSAEWLARPGSVGRAVPPSEVVVVDDGGQP  
AAGQTGQVFFRRRTGNRFHYHNAPEKTQAAYLAPDTFTYGEVGHVDE  
LFLTGRAQDMIVSGGVNVYPAEVEAALLRHPVVRDAAVIGVADDEFGERV  
VGIVVPETTVDPDDLATHLDAHCRVSLAGFKVPRTYRVVESLPRDET  
RKDALRSKFGWLSGAAMTVPRPATGQPTAHRPDIAHPTTYVSGVPHDEFA  
RRRDEPVGWVAEPVLTRHTAAGRTATRGSGFWAVTRYEDVVAASRRVTD  
FSSAAKGAFLTDPRTPADLQQAQQLLVNMDDPHHARLRKLVTSTVFT  
RGLLASIDAHAALVAKVVAAGEFDVVTDLAAELPLLVLADLLGV  
PKQDRALLYGWSNHLVGFDPDFGGGDDIDAYRTAMAEAFQYALNLG  
VERRARPTDLVSLLANAEVDGTRLTDRFCNFWLLLVVAGNETTRHLV  
AGTMQALTEHPGECARLVEGRVPMESAVEELLRWVTPIMQFRRTATRD  
TEIGGQAVTAGEKVVLYYTSANRDATVFAEPDRLDLGRTPNRQLSFGI  
GPHYCLGAHLARAE LTALLRVMSPHLGLSLQLTGPVSRLASNFVNGV  
KAMPAVIGSR

>CYP154M15 (2517943366) *Salinispora arenicola* CNY280

MNDKCPFAALDVTGQDLHGEEARLREQGPAVLVELPGGVKAWSINRYEVI  
RELLMDRRVTKNARKHWPFIKGEIPPDWEMISWVAMDNMVTAYGKDHVR  
LRKLVGRAFTQRRADALRPQVVALSTKLLDDLGGATPPGEVVDLRERFAYP  
LPAMLVASLIGMSEAAALACSKVIDMMVHTNVSPEEAQAVALRGWRAAMAD  
LIESKRRTPGEDITTDLIAAREEDGSRSLSEAELADTIFAILGAGSETTIN  
FFDNAITALLSRPGQLQLLRTGAVTWDDVIDEVLRVESPLAHLPLRYAVE  
DIELDGVTIPQGDPILVNYYAAGRDPALHGGTADEFDLARGDKTHLSFGY  
GPHYCLGAGIARMVATIGLSMLFERFPDLVLAVPATELKRLP TFIMNGHQ  
TLPVRLTAHAR

>CYP107FJ2 (2517943385) *Salinispora arenicola* CNY280

MSETLSTSVLLADAAEQRAWRAKLRGAGPVHRITTSQSGETGWLIVGHEEA  
RNALVDLRLQGRATVGHGRRMPEDLERALNSHMLNVGPPDHTRLRRLVS  
AAFTRRRIEQMRPRIQELTDELDDGLAGADEADLVAGLALPLPLRVLDL  
FGIPAEDCADFNWTKVLTSAGAVDLRLTTAAGEMVAYLRGLLDRKRQV  
PESDLSALVAVRDGADRLSDDELTSMVYLLLTAGYETTVNLIGNGLLNL  
LANPEQLVAFKADPDLLPQVVEEAMRFDSPVQIAVRHSTEPVEIAGQAIP  
SGALILVSLWANRDPDRFTEPEAFRVDRQDNPNQLGFGYGFHHICIGAPLA  
RMEGTIAIGTVIRRFAPALRLAHPAGSLTWRASMVMHGLTALPVHLR

>CYP154M20 (2517943392) *Salinispora arenicola* CNY280

MERCPYVLDRAGRDLHGEEAKALRARGPVTLVELHGGYTAVSVTSYEIAKQ  
LLVDPRISKNTKETWPEFREGKVPQDWELYTWVAMDNMQTRDGEHDLRLR  
KLVAQAFTTRQVAKVRPMIEDIVDRLLDDLEKVPAGEVVDIKGRYFYPLS  
TILVCDLLGIPEADRAEALHGTVVNARTTNSAESEANLHQWQSALSKLV  
ETKRREPGNDITTLIIKAREDEQAPLTDDEVIGSLHLLIGGGTETTSNVL  
CNTLIDLTLHPDQMAMIRSGAVGWEEAAWEEVVRKDGAVGSMPFRCANADI  
EIGGVTTIAKGDVLVINYAAAGRDPERYGDTTAEFDITRADKTNLSFGYGR  
HRCLGPALATMEAMISLPALFERFPDLVLAVPRDELKPQGTFFVFNGYAEV  
PMLLRS

>CYP248A2 (2517943414) *Salinispora arenicola* CNY280

VLADAVTAFDPTAVDVRRDPYPSYHWLLRHDPVHRGAHQVWYVSRFADVR  
AVLGDERFARTGIRRFWTDLVGPGLLSQIVGDIILFQDEPDHGRLRGVVG  
PAFSPSALRRLEPTIEATVNDLLRPARALGAMDVVADLAYPLTLRAVLEL  
LGLPAGDANAIGRWSRAVGRTLDRGATAEDMRRGHAAIAEFADYVERALA  
ERREDGADLLALMLAAHRSQLMsrNEIVSTVVTFFITGHETVASQLGNGL  
LSLLDHPEQLELVRRQPHLVPPQAVEECLRFDPVQSNTRQLAADVELHGR  
RLRRDDVVVVLAGAANRDPGRYDRPDELDIRRDPVPSMSFGAGMRYCLGS  
YLARLQLRTALGAMVALPDLRLVCNPNELAYQPRTMFRGLTRLPVAFTPA  
G

>CYP105W2 (2517943421) *Salinispora arenicola* CNY280

MTGYQDRPTGDQPGAPVPSGSTDPGIGAFPLPRRCPFSPPAEYARLRAEH  
PVVRLPMLGGDTAWVVSRAHADVRLSDPRMSADRRRPGFPKFAPTTEGQ  
RQASFANFRPPLNWLDPPEHAICRRQIVDEFVSRRVRQSRALVERVVDTH  
LDALTAAPGADLVSTFAYPVSSQVICEVLGVYPYGEHEFFERRSTLMFRR  
STPADERARCAREIRDFLDVVVTDKHRPGDDLRSRLLYRQRRAGGVDHE  
AVVSMAFVLLVAGHVTTSNMLALSVLALLTHPARLARLRAEPERFPAAVE  
ELLRYFTVVEAATARTATAEVTIGGVTTAAGEGVVALGQAANRDPRVFEH  
PDEFDPDRDARAHLAFGHGRHICPGQHLARLEMEVALSRLFRRLPGLRLT  
MEVSDLPLKEDSNIFGLYALPVAW

>CYP154M13 (2517943434) *Salinispora arenicola* CNY280

MSTGRPVVLDPTGRDIHGEADHLRALGPATLVELPGGVLAWSINSYEVGK  
ALLSAPNVSKSARRHWPAYNGEIPPDWEMISWVAMDNISTTFGGDHRRRL  
RRLTAKAFGSRRAEQVRPMATHMVNTLLDRMADAADAGEVVDLKAAFAYP  
LPGMLVAELIGMSEEARVAAAKVIDMMTATNITPEQAQGVLLGWRDAITD  
LIALKRAQPGDDITSDLIAARDEDGSLLTEQELVDITFAILGAGSETTIN  
FFDNAITQLLTHPEQLELVKSGQVSWDDVIEEVLRLSPLASLPMRFAVE  
DIQLDGVTIHRGDPILINYAALGRDPALHGESAGVFDVTRQHKEHLSFGH  
GAHYCLGAGIARMVAKTGLSALFERFPRMTLAVSAKDLVPYPTFIMNGNR  
QLPVHLSGALTWREGEQSALGRA

>CYP154M21 (2517943435) *Salinispora arenicola* CNY280

MEKCPYVLDRAGSDIHKEASNLARGPVTLVELHGGYTAVSVTSYEVAKQ  
LLMDPRISKNTKAHWPEFRDGNVPQDWELYTWVAMDNMQTRDGKEHDRLR  
KLVAFAFTGRQAVKSRPIIEEIVNRLDDLETAPRGQAVDIKARYFYPLS  
TILVCDLLGIAEEDRDVILHGNVVNSKTTNTAESEANLHQWQTALGRLV  
ETKRRDPGDDLTTVVIKAGEDEQTPLTDDEVIGSLHLLIGGGTETTANVL  
CHTVVDMMLTHPDQLAMVRSAGVSWESAWEVEVRKDGAVGSMFRCATDDV  
EIGGVTTIAKGDVLINIAAAGRDPERYGDAAAEFDI TRADKANLSFGYGR  
HRCLGPALATMEAMVALPALFDRFPNLALAVPPNELKPKQGTTFIFNGYAEV  
PLLLRS

>CYP125A41 (2517944000) *Salinispora arenicola* CNY280

MTEPRIPAGFDFTDPEVLAHRVPREEFAELRRTAPVWWNAQPRGSAGFDD  
DGYWVVTRYADVMTVSRSDTYSTRENTAIARLRPDTTREDIEMQRVIML  
NVDPPHTKLRAIVSRGFTPRAINALRGLAERAHIVRDAAVRGVGVDFV  
TDVACELPLQAI AELIGVPQHHRKVFWDWSNQLIGYDDPAYGTDPLTASA  
ELLAYAMEMAERQSPSDDLVTCLVNAQIDGELTTDEFGGFFVMLLAVA  
GNETTRNAITHGMVAFLDNPEQWELFKAERP KSAVEEII RWATPVNVFQR  
TALVDTV LGGQAI SAGQ RVALFYGSANFDEAVFEDPERFDITRSPNPHLG  
FGGSGAHFCLGANLARLEIELIFNSIADHLDPDIRKVAAPQRLRSGWINGI

RQMPVRYR

>CYP211C1 (2517944151) *Salinispora arenicola* CNY280

VVDVEELLTRLYSAQGRQDPFPVYADLHAQGPIAALPPEPERRRVAHAV  
GYDLVGAVLRDPEWSKAPPPGWTEQEILRTLQTSMMFINPPDHGRMRHVF  
AGTFTPRRLGALEFVVNRVADELDRMADAGAGGLDFVAEFAYPLPARVM  
AEFIGIPETELDWYRERVDVIDAFLDVAGKTPQRLAAANAAGAELEAFY  
ELLARRRRTPGEDLISGLVEAVDAGGVELTEDELVSNLIVLFNASFVTTV  
YMLSNGLPVLLAHPEVAAAALATDPVLTAGAVDEILRLQAPVHLLARAAPR  
DTVLGGVPI PQGQNVLLLI AAANRDP AHFPDPDRFDPWRS GPPSLAFGLG  
LHYCLGAAVSRLEGRALPRLLSRFPRLRIMEQPVYSGSLFLRGIDKLSV  
SPGEGSTRE

>CYP208A12 (2517944540) *Salinispora arenicola* CNY280

MTLDTITPRVPLGPPRTAALRMLLVMKRDRLGMLTSAAARYGDASRLPVG  
HKALWFFNHPRYAKHVLADNSANYHKGIGLVHARRALGDGLLTSEGDLWR  
KQRKVIQPAFQSRRIAQQAGMIAEEAFALVERLRARAGAGPVELTAEITG  
LTLGVLGRSLLDADLAGFDSIGDSFATVQDQAMFELETINAVPMWIPLPR  
QIRFRARRRKLQAVVDTLVDGRAGNLADRVDVLSRLILSARGEADPRVGR  
ERLRDELVTLLLAGHETTASTLGWTLSLIDRHGPVWERLHAEAVEVLGDR  
LPEYDDLRLRLRYTVMVVEEAMRLFPPVWLLPRRALAPDTIGEYRVPANAD  
VVISPYTLHRHPEFWPNPERFDPERFAPGQAADRPRYAYLPFGAGPRFCV  
GNNLGMMEAVFVIALLCRHLRLTGVPGHRLVPEPMLSLRIRGGLPLVVRP  
VS

>CYP1005A1 (2517945663) *Salinispora arenicola* CNY280

VSAVLFRSWTKTAGTRWPDVTRVADQSGTEHLVVTRHALVRQVLTDAQTY  
RPDNAMEAVTPI PVAALRVLAGHRFRLPPTLANNGGVSHPAIRALVADAL  
HPTKVAAQRPWLTGLVADRVASIRTTLDSGGPVDLYADLTADLPLLVLAR  
LVELPDAPVNAVQKFARAALFWAPLDADRQLSLADEVGRFHQVLRFA  
DTGGGLAAALRATGHSPDVLVGALFFLLVAGQETTSQFLTLHRLSGEP  
TIRAALRAGSISVADVVEEGLRLEPPIVWRRVAAVDSTLGGTTVAAGTS  
VLLWLARAGRDPVVAAPDEFPRPGQRGSRRLAFGAGAHRC LGDQLARME  
AAVVVEQATPLLDGVTVVRPPWYPDNLTFRMPDAFVVRR

>CYP166A4 (2517945873) *Salinispora arenicola* CNY280

MTDAISFELPWARTDKFDPPAVFDALREQRPLARMRYPDGHVGWIVSSYE  
LVREVLGDPRFSHSCAVGHFPVTHQGQVIPHQP IPGMFIHMDPPEHTRY  
RRLLTGEFTVRRTSRLTGHEGVATEQIEVMREHGAPADLVATFARPLVL  
RVLSGLVGLPYGERDRYLHAVTLLHDAEADPAEAAAAAYEQAGAYFDEVIE  
RRRRQPEDDLISTLVGDGELTGEELRNIVTLLLFAGYETTESALAVGMFA  
LLHHEDQLARLRADPTKIDAAIEELLRYLTVNQYHTYRTASEDIELHGEV  
INKGDSVTVSLPAANRDPARFACPAELDIDRETSGHVAFGFGIHQCLGQN  
LARVELRAGLSALLRAFPNRLAVPADEVPLRLQGSVFAVKNLPVCW

>CYP105BL2 (2517946183) *Salinispora arenicola* CNY280

MSSHSAAPDPETATPLHTLAPELAFFQFERSAPFDPPQAYTELSGRCPV  
APVSMADGKPSWLITSFEGVRTTLSDPRFSSDMSHPGFPNRTGKPVDDLL  
KDTLGAMDGERHRYRRLMTGELTVRRAKAMRPVITQITDEALDQLAAAG  
PGADLVKHVAFVVP SRVACHLVGIPLSDYELFTGMAATLMDSTSSDDQFA  
ALQNMVSYFDTLVTDREHHRDDLLGHMVRRYLATGELTRDMLIRLAWTT

MAAGQETTAHMI GLGVAALLRHPDQLELLRREPHLLPGAVDELMRYLPLI  
QFGIPRVAMDDVEVDGQTVTAGEGVVALPPLANRDPVFERPDELDVRRN  
ARQHLTFGYGPHQCPAHALARLELEVYGRLLERFPTLRLADSDADLKVQ  
DKDIMYRVSELAVTW

>CYP1051A1 (2517946385) *Salinispora arenicola* CNY280

MATDAAITRARTVPAWKALPAAVRDTHRAFVDVGNWSDGDVVRVSLGVSR  
PYLVTNPAHVQEVLHERAAIYPRGDDTALWRSVRKLVGDGILAEGDAWAA  
SRRVLAPMFRPARINAMVDTMADA IAGAVDDLHGAATAGTPIDVGRELSR  
IVCSAIMRVFFADRITVRDALRIMKAQETIVTAMAPRILAPLVPWWIPMP  
GDRRFRAAVRSID DILLPVLRQAQRQPDDGDDLLSRLVRARADDGQALSE  
KMRDDDLVSMVAVTTETSTVVLTWMMWPLL ANHPDVANRLYDEIDRVVGGG  
PVRGDHLAELTYTRMVLDELLRLYPAGWILPRAATTDVLGGVRINKGAT  
VILSPYVTQRMATAWWGPTAEAFDPERFAAGREAADGRHRYAYYPFGVGMH  
RCLGEHLFNLEAILIVATLLSRFRFALTDTSMPGVKVAASRTPARTVEMI  
LKPVAPVPAR

>CYP105G5 (2517946405) *Salinispora arenicola* CNY280

LTIETTETTPADDSLAPLPRQFMQRDDPSKLPPALAALAEQSPVGRSTL  
PDGDPFWMVSGYDEARAVLSDRFSSDRFRYHPRFKKLSGQLGERLRNDK  
ARAGSFINMDPPEHTRYRKLLTGQFTVRRMRQLTVRIEQIVTEQVDVMLA  
EGNSADLVSAFAVPVPSLMICELLGVRYEDRTEFQRRAGLLQTDLPKQ  
AVENLEAQRAFMQRLVTDKRRTPADDMISGLVHHAGAEPPLTDDELVGIA  
TLLLFAGLDTTASMLGLGMFMLLQRP EQMAVLRDDPSRIGDAVEELLRYL  
TVVSTGLFRFAKEDVVLGDEHI PAGSTVVVSLMAANRDGRHWPEPETLDV  
TRVRSSHLAFGHGVHQCLGQQLARIELTVGITELLRRLPNVRLAVPPADV  
PLRNDMITYGVHRLPILWDTP

>CYP107Q4 (2517946406) *Salinispora arenicola* CNY280

MTTTAETS AETIDLFSPEVVADPFGWYARLREETGPTTGTLNIGTMMGGP  
EMWLVTTRYEDVRQVLTDP RFLTNPADSPLEDIRAGVFKRDLFPDLPW  
MANLLNVSDGEDHTRLRKLVSYALTAHRIGKLRPRVEKITADLLDKLAED  
GKDGSPVDLVEEYCYPLPVTVICELVGIDE PDRPHWRAWGDSMATMNGER  
IPTTLVKCIELARELIANRAEPQDDLV TALVQAQAEQDNRVSDDEIIGI  
LFSLVTAGHQTTTYLIGNSVILLLENPDQLARLKENPSMWPQAVRELQRL  
GPIQFAQPRFPSEDIELGGVTIPRGAPVAPLLAANTDPRRFPDPNKLII  
DRLAVGSEHGLGFGKGIHRCLGQHLAYQEA E VALQGLFTRFPDLSLAVPR  
EEIPWILRPGFTRTRTLPLKLV

>CYP105AB8 (2517946962) *Salinispora arenicola* CNY280

MTETASSRLTDTEFPVQRECPFAEPVEYEQIREQSSIAMVRLTGGGEAWW  
ISGHEQGRAVLADRRFSSDRKANFPFVSTDPAIRKRLHAQPLSLISMDG  
AEHTQARRALIGEFTVRRLAALRPRIQQIVDQCIDEMLTDDQHRADLVKT  
LSLPVPSLVICELLGVADHDFFQEHTATLVRRNTASEVRQHSIDELNA  
YLGALIDRKLASPD DDLGRQIARQHRDGTFRSSMVSLAFLLLVAGHET  
TANMISLGVVGLLQHPEQLAMIKDDPKTPLAIEELLRFFTIVDSVTSRV  
ATEDVRFGDDTTINAGDGVVVSGLSADWDPTVFADPDRLDLERGARRHHLAF  
GFGPHQCLGQNLARLELQIVFDTL FHRIPTLRLAAPLDKIPFKTDAAIYG  
ARELPVAW

>CYP211B2 (2517947129) *Salinispora arenicola* CNY280

MDVSEAI AVLISPSGRLDPYPTYEQ LRAHG PVSQTTAGLFVVVTGYAEADM

VLRDPRFVVLDDDLRDDVFPHWQDSPAIKSIARSMRLRTNPPDHSRIRRLA  
AGAFTPRRVAAMREVVTQADELVDemiQAGRDGARVDFMDMFAYPLPVA  
VICALLGVPAADRSRFRRWAGDLTGILEPEITPEELAGADAGADELRDYF  
TGLIEQRRRAPADDLTALVQAHDADGDRLSGEELLANLVVLLVAGFETT  
TNLLGNGLVVLTRPEAAAAALRDEPD LAPGYVDELLRYDSPVQLTTRTVR  
ESVSFAGTELPAGSWLLVLLGAANRDPRRFPDPARFDPGRAQSQPLSFGA  
GPHYCLGAGLARLEAQVAFPLLLRRLPELALAGRPSRRRLTLRGYETLP  
ITVGAVTADRGT PAGVAPGTF

>CYP247A7 (2517947169) *Salinispora arenicola* CNY280

VRLTPGAARDIDLDSVNLFDLDLYTSGDPHPIDVDMRAQSPLHHQVLADG  
REFWSVTRYDDVCRVLGDYREFTSERGTVVTHLGEDDIAAGKLLTSTDPP  
RHTQVRRRAIGAKLTARAVASWQDRIRDAIVRFLEPALDGDTFDLAEQALL  
LPAIVTGPLLGIPEWDQELVQLTAMVTAPSDPHFQHGSEAATLAISHHE  
LVTVVTEWVKQRRSAGGGDGSLLDHLMSVRVGGAPLTDEEIALDGYSILL  
GANVTTPTHTVSGTVLALIERPEQFEKAQADPSLLANLVEEGLRWASAACN  
FMRYAVNDTRIGGGTVPAGGAVVAWIGSANRDESYFPDPHQFDITRSGAN  
RQVAFGFGPHYCIGAPLARMTLGIFFEEELVQRFGSIELAGEPQHLSYFI  
AGMTHLP IVAQKRKTP

>CYP162P1 (2517947251) *Salinispora arenicola* CNY280

MGLPSEVDLAEPDLADPDLYAEGDPDAEWAWLRAHRPVYRNPAGATAEFW  
ALTRYRDALQVYRDPSTFSSERGMVLGVDPVAGDPAAGRMLVVTDPPRHP  
KLRRIVSGIFVPRTMHRLEGRVRSVLDQLLHRVVDGAGRCDFVNDVAARL  
PVAIIICELLGVPADEQDWMYHLTSTAFGGGDPAGSAEVS AVERAEAYGDI  
LLYYGELAAERRRRPGDDLVTLLVHADLDGEPLDVEDVLVNCNLIIGGN  
ETTRHAASGGLLALAQRPELWRRRLRETPTAVPTAVEEVLRWTTFGMHVLR  
TATRDEIIGGVPIRAGERVVVWNAANRDEDVFADPQHFDIDRSPNRHIA  
FGQGGHCLGAALARLELTILFEEMAKQVTNVRLTGPVRRVRSCVLRGIR  
ALPVELVT

>CYP105CH1 (2517947292) *Salinispora arenicola* CNY280

VSSLPLPTYPKLRDPADPLLPPAEYLAIQSEKPIAKVLLPSGRPTWLITG  
HALARQVLTEPCVSVDRRHNPFPYPVNPDAVVAQVARWTYILLGDDPPL  
HTERRRLLI SEFTVRQAQAMRPRIQQLVDFHLEQLIAAGPGADF SKHFAM  
KVPSAVICEMLGVPFADHDYFQERTALQLRRDVPVAAQKQAIDELLAYFE  
QLIQEKSSHPGDDVLSRLIVSNRETEAFDHEALVALGLLLLVGGHETTAN  
TLTLATATMLERPEIAEQLRTPSLMPSAVEEFLRYFSVAVAVSRIATAD  
LQVGGQLVRAGESMLLVNLT IARDGTVFPEPHRLDIRRNARNHLAFSHGI  
HQCMGQNLARVEMQIALD TVLRRLPGLHLVAPFEELPFKYRHLVWGIEEL  
RVAW

>CYP107AY2 (2517947640) *Salinispora arenicola* CNY280

MTAEPTPIPRSGARLGQEYDQLRKTGDVHQVLLPDASLAWLVTNPEVAAR  
ALADPRLALNRRNSRGGWSGFALPPALDANLLNLDAPDHTRLRRLVGPAP  
SPQ RVAALRPGIRRAAEHLLDTLVATSGPTDLVTGYCNPLSVQVIADLMG  
VPEAGR TNLRAWTDMLTSYPPDRDAIRQAVTELHGYYVDLIDIKQQQPG  
DDL LSALVTIEQDGDRLSRDELTS LAFLILFAGYENTANLIASAVLWLLD  
HGGLNVVPSSEAIEATLRHEPPAPVAIRRFPTEDIIIGDVTIPAGDTVLL  
SVAAATRGADGNAARLAFNGNGPHYCLGAALARVEAEALTVLARRLPGLT  
LAVPPSQVRWRPTFRTHGPAELLVGW

>CYP107EU1 (2517947725) *Salinispora arenicola* CNY280

VTIGQTLPLDVYSPEFTRDPYAIFARLREQAPVCRVTTTHRGMSAWMVTRH  
ADVRALLADNRLAKDGNRIGELMPRHSTLTGAATGFPPGLTTNMVNSDPP  
DHTRLRYLVGREFTGHRVEGLRPRIEEIVDDLLDGVAACGDEADLAETLA  
RRLPIAVIGELLGVPEADRAEFFRWADTLYGGTASPEALGQAYNAIVDYL  
GRLCDAKRDPVADDLLTALVQVSADEDRLSREELVSMALLLLLVAGHETTS  
KQISNGVLALLLNPEQLKLLKAQPARTAGAVEELLRFEGPSLSASLRFTT  
EPVEVAGVVIPEGEFVLLSLASGNRDPEKFPDPDRLDITRSTQGNLAMGH  
GIHHCVGAALARLELEIVLSRLVARFPQMLAVEADDLEWLVNSFFRAPL  
HLPVSLRR

>CYP1223D1 (2517947814) *Salinispora arenicola* CNY280

MSTVVSAMQTLRSEAGRADPFPIYAELHKLGAVCAVDDPAERYQFVVHGY  
DAVNHVLRDPAYRVTDAEMLERGGLRWREHPSLVAVLTSMFFTNEPRHAR  
LRGMYSRIVTSRRVNALRGQIVAIVDDLLARMAERGAGGEPLDFMAEFAP  
PMPGNVICEMMGVPDGRSWFIPRAHIFGDLLDLGKSSAELLRTADEATV  
ELTEYFGKLIALRQKDPDDMISGFAQLQATAERIPEPELLASLLTFFNA  
GFASTSHLLGNGVPLLAGQPRTIEAIQRDDVAARHVEEILRVAPPTHMAV  
RVTGEDRTVAGLTMPAGSLLLVLLAAANHDPARFPDPGRFDPNRPDNRPL  
TFGAGAHFCLGAPLTRLEGQVAFPMFLDRFPKLAPVGEATKTNRLTSLGY  
QTLPVALS

>CYP107NF1 (2517947815) *Salinispora arenicola* CNY280

MPGYSLDSPARLDTDDFVADAHGVFATLREVAPAVPVIINGGIHAWLITR  
YDVAKQAFSTDDMAKDVAAHWRFAHAGEVPFTGDVAVAARRNILSTDPDPH  
TRLRSALAAAFPRRVEALRGWIGRIVADLLNSIASAGSADLVADFALPI  
PMTVICELFGVPEEHRPHIRSWTETLFHGAEPDRMRQASDDIDSLLAEVI  
ASRRARPGDDFTSTLVRAQDEGQLSTVELVMLLRAMLGGNETTINLLGN  
AAAALLRWPDPQRATLTADPQRWPDAAIEEVLRRDGPIQNSIWRFATTDIKI  
GEVTIPCGDAIIIALAAAGRDGRRFADPDRFDIGRTDQAHLAFGRGIHHC  
IGAPLARLEAAVALPALFARLPDLRLATSWEQLRYRRSTMSRSLVSLPVK  
FTPASPDHPAHP

>CYP1902A1 (2517947831) *Salinispora arenicola* CNY280

MVAIGRITYNPVGPAFFIDPYPHYAQLRAENPVHHTKYGFVVLTRQKQIV  
EAYRHPALSRNTMLWEDFATWRRGSTDGPLERMMANWLV MIDPPRHTPLR  
AIHEQVFTRRLDLAATSVVESIVSELLAPGRAAGGMDLVGEFADRIPVYL  
INHLLDLPRADWDRIEWSRAIALTNEPMLTSKVL RAGEDARTAMGEYFD  
PLIACRRATPGDDVLSGLAVTEVDGVRLTSEELQDSLAFLYQAGHPTSTH  
LISLAVHSLLRNPDQLDRLRADPSLIPDAVEELHRYDGPVQMNDRVAVED  
VHLFGEHLHRGQLVRLCVASANRDEDHHPQAARLDVTRTVTDQLGYGHGL  
HHCVGAHLGRVQAQAALRALLAAAPGLRLTGDRRLRFLPSASNRGLVALPV  
AF

>CYP105J3 (2517947916) *Salinispora arenicola* CNY280

MTDSVAFPQGRVCPHQ PAPGYRPLAVQRPLAQVTLYDGRRVWAVTTRDLA  
RRLLVDPRISSDRNTNPAWPAIVPIVAAAVNDAQQEV LKIALVGTDGPE  
HKAQRKMLIPSF TFRMNALRPMIQEIVDQQLDEMIKSGAPTDLIPAFAS  
AVPVTVLYRLMGIPDDDHGIF EKLSHQLLAGPNANEAYDQLMGYMSRLIA  
ERRRNPGEGLVDDLLAQHGANDDADHDELVSTLVVQVAGNHGTTGSMIAL  
GLFALLQHPEQLAELRADPSLMPTAVDELLRFLSVPDAVTRLAADDIEVE  
GTIIRKGDGVFFITSLINRDTDVHDAPNSLGWHHASAADHLTFGFGAHQC  
LGQSLARITVEIALGALIERLPSRLAVPAEEVPFLPAASLQVIAELPIT  
W

>CYP163B16 (2517948026) *Salinispora arenicola* CNY280

VTAADPGRVSGESQTPAHTVDLADPATFANRDLTGFWQQLRDEEPIHWN  
PPTSGRRGFVVVSRYADILDVYRDDVTFTSERGNVLVTLLAGGDAGAGRM  
LAVTDGPRHAELRKLLLRALGPRVLAPVCAAVRANTRQMVREAVTKGEC  
FASDIASRIPMMTISNLLGVPDADRAFLSLTKTALSADDESISETESAM  
ARNEILLYFQDLMEFRRDHPGEDVVSMLVNSTIDGAPLSDDDIVLNCYSL  
IIGGDETSRLTMIDSVNTLAAHPKQWRRLKDGQCEIDKAVDEVLRWASPS  
MHFGRAAAKDTILRGVQIRADDIVTLWHASGNRDERVFHRPEVFDLGRT  
NRHLSFGHGPHYCIGSYLAKVEISELLIALRDLTSGFETTGEFPQIRSNL  
LTGFSTMPVRFVPDRAGLARDALDG

>CYP1198B1 (2517948519) *Salinispora arenicola* CNY280

MSGELTDQRTAPGAGGNPLRSLMDHGIRANPYPLFGELREAGPTAVEDGS  
VVLFGGEYEHCSQILRHRDMGSDTSEAPSIKGFVVDDAERAGSSIFFMDQP  
GHGRQKRLVSKSFTPRIVKSFGPQITHIVDGLFEDFRDRGELDVVTDLAY  
PVSIGIICDLFGIPDDERDMLKEWSDDLALSTELPTLGAAIGVLNVFTRD  
EINRFGSVAMAAHAYFADLIHRRRKPNPGDDLVSLLATESNGERLTRFEV  
TSVLATLFVAAHESTTNLISGGILALLRNQDQMAVLRENPGELITNVVDES  
LRYDPPVHLAARMARARTTIGGYDLDPGTIVVVLMAAGNRDPRAYENPDV  
FDVNRKIRNVSLAFGAGAHFCIGSGLAKLEAEIAISAFQRLKHPEVDES  
SLEYRRHIVVRGLEHMKVAFQP

>CYP154M19 (2528442769) *Salinispora pacifica* CNY202

LNTTAPILLDPTGRDVHAEGDRLRAQGPIAQVELPGGVRAWSVVGDMVR  
KVLADNRFADKDPQHWPAFINGEVGDEFPLIGWVLMNMTTSDGADHTRL  
RKLTAFAFTLRTEAMRPQIKNIATELLDDLAAPPAGEIVDLKGSYAYPL  
PTRVICDLFGVPEHLRREVMRGGEVNVNTTISHEEAVANVEQWHQAMHDL  
VEMKRQNPGGDLLSMLIKTQAEDGTRLNDSEMAGTLHMLGAGSETTTNL  
ISKAVVMLLTYPDQFALVRSGQVTWKDVIEETLRVQAPIAQLPFRFTTEE  
VQIGGVTPKGDVPLIGFAAAGRDPRRHGVDADRFDLTRDDKEHLSFGYG  
VHCLGAPLARLEAAIALPLLFERFPELALAVPANEIDPQGSFLLNGAST  
LPVHLGRAA

>CYP125A15 (2528443473) *Salinispora pacifica* CNY202

MTEPRIPVGFDFTDPAVLERRVPREEFAELRRTAPVWWNVQPRGSAGFDD  
DGYWVVTRYADVMAVSRSDTYSTRENTAIARFQPGTTKADLEMQRVIML  
NVDPPPEHTKLRAIVSRGFTPRAINALRGSLAERAERIVRDATVHGTGDFV  
TDVACELPLQAIAGELIGVPQQHRRKVFDWSNQLIGYDDPAYGVDPLAAAA  
ELLAYAMEMADERQRNPSDDLVTKLVAQIDGHELTDEFGFFVMLLAVA  
GNETTRNAITHGMLAFLDHPDQWELFKAERPRSAVEEIIIRWATPVNVFQR  
TALVDTTLGGQAIASAGQRVALFYGSANFDESVEFQPERFDITRSPNPHLG  
FGGSGAHFCLGANLARLEIELIFNSIADHMPDIRKVAEPQRLRSGWINGI  
REMPVRYR

>CYP211B10 (2528443926) *Salinispora pacifica* CNY202



MDASEAVALLMSPPGRLDPYPTYERLRAHGPPVVSTAAGFFVVTGYAEADT  
VLRNPRFGVMDDDKERDDVFPWHQDSPAMMSISRSMIRANPPDHSRMRLA  
AGVFTPRRIAALREVVAQAADGLVDEMIRAGRGAPVDFMGGFAYPLPVT  
VICALLGVPAAADWAQFRRWASDLTGVLEPEITSEELAVADAGASELRDYF  
TELVAQRRRAPADDLTALVQEHADGDRLSGEELLANLVLLLVAGFETT  
TNLLGNGLVLLTHPDSATALRDQPELAPSYVDELLRYDSPVQLTTRTVR  
ESVPIAGVELPAGSWLLILLGAANRDPARFTDPTRFDPGRAQSPPLSFGA  
GAHYCLGAGLARLEAQVAFPLLLRRLPELALAGEPTRRNRLTLRGYETLP  
VTVGAVSADHGTPAGAALGTP

>CYP154AJ3 (2528445062) *Salinispora pacifica* CNY202

VDDESLFVIDPAGADIHGEGARLRASGPVTRVLLPGGVEAWSVTGYHAAR  
QVLADARFAKNARQHWPAYVNGDLGPDFPLIAWARMDNMSTTDGESHARQ  
RRLVAGAFSPORIAALQPRVERAVARALDELAQAQAEQPGEPIDLKERYA  
HLVAARVIGELLGVPDSDPDGILDRAGYIESTPQRAAAEFALLRSKIEAL  
VAAKRRTPEGDLISDLIAAQPGGCPVTGAGAGSDAELVGLAQLMLNTGAE  
PARNLITNTVLALLTRPGQRAQVMGGEVSWGDVVEETLRTDAPVAHLPPFR  
FATEEVTIAGTTISPQDPVLVGYAATGRDPELHGATAGEFDARRADKRHL  
AFGHGVHRCVGPALTRMEVRIAVQALFTRFPGVRLAVEPKELVGQGTIFIM  
NGRRELPVQGLCAQP

>CYP105BL4 (2528445137) *Salinispora pacifica* CNY202

MSSHSAAAPDPETATPLHTLAPELTFPQFERSMPFPDPPEAYTELSGRCPV  
APVRMSDGNPSWLTISFKGVRAALSDPRFSSDMSHPGFNRTGKPVDDL  
KDTLGAMDGERHRYRRLMTGELTVKRAKAMPVITQITDEALDQLAAAG  
PGADLVKHVAFVVPSPRVACHLVGIPFSEYELFTGLAAKLMESTSSADQVA  
ALQDMVSYFDKLVTDREHHRDDLLGHMVRRYLATGELTREMLIRLAWTT  
MAAGQETTAHMI GLGVAALLRHPDQLELLRREPHLMPGAVDELMRYLPMI  
QFGIPRVAMDDVEVDGQTVTAGEGVVALPPLANRDPVFERPDEL DVRN  
ARQHLTFGYGP HQCPAHALARLELEVVSRLLEFPTLRLADSDADLKVQ  
DKDIMYRVSELAVTW

>CYP1005A6 (2528445213) *Salinispora pacifica* CNY202

VSAVLFRSWTKTAGTHWPAVTRVADQQGTEHLVVTEHALVRQVLTQVTY  
RPDNALDAVTPIPVAAALRVLAGHRFRLPPTLANNGGVSHPTIRALVADAL  
HPAKVAAQRPWLTGLVAERVAAIRATLDAGGSADLHAELSADLPLLVLAR  
LVELPDAPVSAVKQFARAALFELFWAPLDADRQLALADEVGRFHQVLRFA  
DTGGGLAAALRATGHPPDVLVGALFFLLVAGQETTSQFLTLLHRLAGEP  
TVRAALRDGSVSVTNVVEEGLRLEPPIVTVRRVAAVDSTLGGIAVPAGTS  
VLLWLLARAGRDPAIVPTPDEFRPGQGRSRRHLAFGAGAHRCCLGDQLARME  
AAVVVEQATPLLDGVTVVRAWPYPDNLTFRMPDAFVIRR

>CYP211C3 (2528445655) *Salinispora pacifica* CNY202

VLDVEGLLARLYSAQGRQDPYPVYADLHAQGAIAALAPRPERQRVAAVAV  
GYDLVAAVLRDPEWFKQPPPDWTEQEILRTLQSSMMFINPPDHGRMRHV  
AGTFTPRRLGALEPVINRVTDDELLDRMADVGPGEVDFVAEFAYPLPARVM  
AEFIGIPATELAWYRERVDRIDAFLDVAGKTPERLAAANAAGAE LRAFYG  
ELLARRRRTPGDDLISGLVEAVDAGGVELTEDELISNLVVLFNASFVTTV  
YLLSNGLPVLLAHPELAAALANDPELAAGAVDEILRLQTPVHLLARAAPR  
DTVLGGVPI PQGQNVLLLI AAANRDPAHFPEPDRFDPRRRGPSSLAFLG  
LHYCLGAAVSRLLEGRALPRLLSRFPRLRILEQPVYSGSLFLRGIDKLSV  
SPGGREHP

>CYP107AY4 (2528446024) *Salinispora pacifica* CNY202

MMSQDQPMRAELAPVPRSGARLGQEYDEFKAGDVHQVLLPDSSSLAWLVT  
NPELVSRALADPRLALNRRHSRGGWSGFALPPALDANLLNLDAPDHTRLR  
RLVGPAFSPQORVAALRPRIIRRTAERLLDTLVAAGSPVDLVTGYCTPLSVQ  
VIADLLGVPEAGRADLRTWTDMLTSYPPDRAAIRQTVVELHGYVNNLIA  
AKQQQPGDDLLSALITIEQDGDRLTRDELTSLAFLILFAGYENTANLIAS  
TVLRLLDHGGVREVQISDAIEETLRLDPPAPAAIRRFPTTEMTIGGATIP  
AGDTVLLSIAAATRGADGNATRLAFGNPFPFCLGAALARVEAEETLTVLA  
RRLPGLALAVPVAQVRWRPTFRTHGPAELLVTW

>CYP245A15 (2528446252) *Salinispora pacifica* CNY202

MPSATLPRFTLTGTWTREDIINPYPVYQRYREVAAVHRGEAGGGAPETFYV  
FSYDEVSRVLSSSCFGRGRSLDAAAASVPVPTEQKALRAIVENWLVFMDP  
PRHTELRSLLNRSFSPRIVTGLRPRIARIAQELL SRLGQQAEDLVEGFA  
APLPILVIAELLGIPAERHRWLRANAVALQEASSSRARRDVG YARAEAA  
AQEFTDYFREQVCLRRGSTGDDLM TILANAQLRGAPVGLDAVVGTCVHLL  
TAGHETTTNSLAKAVLALRAHPAVLEELRRTDGLTADSIEEF LRYDPPVQ  
AVTRWTHQD TTIGDW DVPGRSRVVAL LGSANRDPARFPLPDALDLHRPTD  
RQLGFGLGIHYCLGATLARTELEIGLQTL LDGLPTLGDSAQYVDYADDMV  
FHGPSRLILINPGERFRS

>CYP244A5 (2528446256) *Salinispora pacifica* CNY202

MSATTNAELGEAPETTMPVDPGLFDCMPDLIAAARIAPVVRI PYLGRHAW  
VVCDELVKQAL THPKMGKDITL VPEWMRQPGLMVTAQPPPEYARAMIMS  
DGENHARIRRIHAPVLS PRNTERWGEQVAGKVEGFLDELSQAASGRNAEV  
DVVTNYTHKIPLAFISEMLGLPPEAEHRLRSITDIMLYSSDYAARREAIG  
GLFGAVEEWVRNPAGLRDGVITGLLAASDGPGA AVTEGEVIVWTLGMIIT  
GYETTGSLISTSLYEALRRPPHERPKSDEDITAWIEETLRVHPPFP HPTW  
RFPLEDIELGGYLIPKGAPVQLSIAAANREPGE GADSFDAERRGHGHLSE  
GLGMHYCIGAPLVRLEAKIAVRGFLRRFP RARLSADTAVQWESEWMIRRM  
SALPAVLS

>CYP208A23 (2528446757) *Salinispora pacifica* CNY202

MTVIADRGGVRPPGPPATAGLRLL LALGRDRLGMLTSAATEYGDVARLPV  
GPKRLYFFNHPDHAKHVLADNNANYQKGIGLVHARRALGDGLLTS DGELW  
RKQRRVIQPAFLNRRLAQYAGVVGQEATRLAERLATRAGGPPVDVLDEMT  
QLTLGVLGRTL LLD AELTG FHVGVDSFAAVQDQAMFELETLSAVPTWIPLR  
RQRRFRARRRHLQEVVDVLA AERGQDVEGRE DVLSRLIVSTRAEADPEVG  
RQRLRDELVTLLLAGHETTASTLGWSLHLLDKHPQLRERVRQEATSVLGD  
RVPVYEDLHRLQYTAMVVQEAIRLYPPVWILTRKARAEDEVGGYRVPAGA  
DLLICPYTLHRHPRFWEEPERFDPERFDPARLTNRPRYAYIPFGAGPRFC  
VGNNLGMLEATLVLAVLLRDLRLLEGLPGRAVVPEPMLSRLVRGGLPMTVR  
RVD

>CYP105AB24 (2528446814) *Salinispora pacifica* CNY202

MPETASITTTGTASTATTGAASGKVTD AEFFPVARGCPFSTPAEYEQIREH  
SPIAKVRLTTGREAWWIAGHELGRAVLADRRFSSDRRRDNFPFVSTD PET  
RKQLQDQPTSMLGMDGAEHAQTRRALMG EFTVRRMAGLRPRIQQIVDQHI

DEMLSSEQRSADLVEALSLPVPSLVICELLGVVPYADHDFQGLTGPLL RH  
TTPPEAR GRIQEELNTYLGT LIDRKLTDPTDDLGRQIAKQHAAGTFDRT  
SLVSM AFLLLVAGHETTANMISLGVVGLLQHPDQLAMIKNDPEKTPPAVE  
ELLRYFTIADTVTARVATEDVQLGDTTINAGDGVVISGLAADHDP TVFTD  
PDRIDLERGARRHHVAFGFGPHQCIGQTLARMELQIVFDTLFRR IPTLRLA  
APLDDIPFKSDAFVYGA EKLPVAV

>CYP107AX4 (2528447187) *Salinispora pacifica* CNY202

MTSQPAPVFDQ LLLRDPHRRYNALRDEAPVHHIRTPDGAPAWLVTRYDDV  
RAAFTDPRLSVDKRLSST DGEHGSSLPELDAHLLNRDPPDHTRLRRLAA  
AAFTPRRVADLRPAVERIVSTLLDGLVGHDQAE LIGSLASPLPLQVMQEL  
LGLPTQTSVDFRRWNTNLLSADANQPAQSR SAMANMRRFLVEQLAHKRAR  
PGDDLLTG LLAAREDDRLTDDELVAMLFLLMFAGYDNTAALIGNVVHAL  
LTNTELPAAVRTGSLALDELVDGVLRWNP SFPLAVRRFA REPIT IAGQTI  
PAGDRIWLCLASANRDPAQFTAPDTLGTTGMRRPHLSFGHGIHYCLGAPL  
ARLQTTVAVTILLDRFPGIRLGLRRFPCLTWVWSVGQDVPVQEGPRHGR  
QEEHGSASAAVGGGGGV RVAAGRAGQGRWSLVGRSGWAPRGDHPHGP GIS  
ARRRTGCPRRRGRRRRGVGS

>CYP208A12 (2562124610) *Salinispora arenicola* CNY679

MTLDTITPRVPLGP PRTAALRMLLVMKRDRLGMLTSAAARYGDASRLPVG  
HKALWFFNHPRYAKHVLADNSANYHKGIGLVHARRALGDGLLTSEGLWR  
KQRKVIQPAFQSRRIAQQAGMIAEEAFALVERLRARAGAGPVELTAE L TG  
LTLGVLGRSLLDADLAGFDSIGDSFATVQDQAMFELET LNAVPMWIPLPR  
QIRFRRARRKLQAVVDTLVDGRAGNLADRVDVLSRLILSARGEADPRVGR  
ERLRDELVTLLLAGHETTASTLGWTLSLIDRH PGVWERLHAEAVEVLGDR  
LPEYDDLRLRLRYTVMVVEEAMRLFPPVWLLPRRALAPDTIGEYRV PANAD  
VVISPYTLHRHPEFWPNPERFDPERFAPGQAADRPRYAYLPFGAGPRFCV  
GNNLGMMEAVFVIALLCRHLRLTGVP GHRLVPEPMLSLRIRGGLPLVVRP  
VS

>CYP1005A1 (2562124949) *Salinispora arenicola* CNY679

VSAVLFRSWTKTAGTRWPDVTRVADQSGTEHLVVTRHALVRQVLTDQATY  
RPDNAL EAVTPVPVAAALRVLAGHRFRLPPTLANNGGASHPAIRALVADAL  
HPTKVAAQRPWLTGMVADRVATIRTTLDSGGPVDLYADLTADLPLLV LAR  
LVELPDAPVNAV KQFARAAL EFWAPLDADRQLALADEVGRFHQV LREFA  
DTGGGLAAALRATGHSPDVLVGALFFLLVAGQETTSQFL TLLHLRLSGEP  
TIRAALRAGSSSVADVVEEGLRLEPPIVTWRRVA AVDSTLGTTVAAGTS  
VLLW LARAGRDP AVVAAPDEF RPGQRGSRRLAFGAGAHRC LGDQLARME  
AAVVVEQATPLLDGVTVVRPPWYPDNLTFRMPDAFVVRR

>CYP1051A1 (2562125182) *Salinispora arenicola* CNY679

MATDAAITRARTVPAWKALPAAVRDTHRA FVDVGNWSDGDVVRVSLGVSR  
PYLVTNPAHVQEVLHERAAIYPRGDDTALWRSVRKLVGDGILAE GDAWAA  
SRRVLAPMFRPARINAMVDTMADA IAGAVDGLHGAATAGTPIDVGREL SR  
IVCSAIMRVFFADRITVRDALRIMKAQETIVTAMAPRILAPLVPWWI PMP  
GDRRFRAAVRSIDDILLPVLRQAQRQPDDGDDLLSRLVRARADDGQAL SE  
KMRDDLVSMAVTTETSTVVL TWLWPLLANHPDVANRLYDEIDRVVGGG  
PVRGDHLAELTYTRMVLD ELLRLYPAGWILPRRAATTDVLGGVRINKGAT  
VILSPYVTQRM TAWWGPTAEAFDPERFAAGREAADGRHRYAYYPFGVGMH  
RCLGEHLFNLEAILIVATLLSRFRFALTDTSMPGVKVA ASTRPARTVEMV

LKPVAPVPAR

>CYP105G5 (2562125207) *Salinispora arenicola* CNY679

LTIETTETPPADDSLRAPLPRQFMQRDDPSKLPALAAALAEQSPVGRSTL  
PDGDPFWMVSGYDEARAVLSDFRFSDDRFYHPRFKKLSGQLGERLRNDK  
ARAGSFINMDPPEHTRYRKLLTGQFTVRRMRQLTVRIEQIVTEQVDVMLA  
EGNSADLVSAFAVPVPSLMICELLGVRYEDRTEFQRRAGLLQTDLPKIQ  
AVENLEAQRAFMQRLVTDKRRTPADDMISGLVHHAGAEPPLTDDELVGIA  
TLLLFAGLDTTASMLGLGMFMLLQRPEQMAVLRDDPSRIGDAVEELLRYL  
TVVSTGLFRFAKEDVVLGDEHIPAGSTVVVSLMAANRDGRHWPEPETLDV  
TRVRSSHLAFGHGVHQCLGQQQLARIELTVGITELLRRLPNVRLAIPPADV  
PLRNDMITYGVHRLPILWDTP

>CYP107Q4 (2562125208) *Salinispora arenicola* CNY679

MTTTAETS AETIDLFSPEVVADPFGWYARLREETGPTTGTNLNIGTMMGGP  
EMWLVTTRYEDVRQVLTDPFRFLTNPADSPLEDIRAGVFKRLDFPPDLIPW  
MANLLNVSDGEDHTRLRLKLVSYALTAHRIGKLRPRVEKITADLLDKLAED  
GKDGSPVDLVEEYCYPLPVTVICELVGIDEPDRPHWRAWGDSMATMNGER  
IPTTLVKCIELARELIAKRAEPQDDLVTALVQAQAEQDNRVSDDEIIGI  
LFSLVTAGHQTTTYLIGNSVILLLENPDQLARLKENPSMWPQAVRELQRL  
GPIQFAQPRFPSEDIELGGVTIPRGAPVAPLLLAANTDPRRFPDPNKLI  
DRLAVGSEHGLGFGKGIHRCLGQHLAYQEAEEVALQGLFTRFPDLSLAVPR  
EEIPWILRPGFTTRTRLPLKLV

>CYP125A41 (2562125760) *Salinispora arenicola* CNY679

MTEPRIPAGFDFTDPEVLAHRVPREEFAELRRTPVWVWNAQPRGSAGFDD  
DGYWVVTRYADVMTVSRSDTYSTRENTAIARLRPDTTREDIEMQRVIML  
NVDPPPEHTKLRAIVSRGFTPRAINALRGSLAERAHIVRDAAVRGVGDV  
TDVACELPLQAI AELIGVPQHRRKVFWDWSNQLIGYDDPAYGTDPLTASA  
ELLYAMEMAEERQSPSDDLVTKLVAQIDGHLTTDEFGFFVMLLAVA  
GNETTRNAITHGMVAFLDNPEQWELFKAERP KSAVEEII RWATPVNVFQR  
TALVDTVLGGAISAGQRVALFYGSANFDEAVFEDPERFDITRSPNPHLG  
FGGSGAHFCLGANLARLEIELIFNSIADHLPDIRKVAAPQRLRSGWINGI  
RQMPVRYR

>CYP211C1 (2562125911) *Salinispora arenicola* CNY679

VVDVEELLTRLISAQGRQDPFPVYADLHAQGPIAALPPEPERRRVA AVAV  
GYDLVGAVLRDPEWSKAPPPGWTEQEILRTLQTSMMFINPPDHGRMRHVF  
AGTFTPRRLGALEPVVNRVADELDRMADAGAGGLDFVAEFAYPLPARVM  
AEFIGIPETELDWYRERVVIDAFLDVAGKTPQRLAAANAAGAE LRAFYG  
ELLARRRRTPGEDLISGLVEAVDAGGVELTEDELVSNLIVLFNASFVTTV  
YMLSNGLPVLLAHPEVAAALATDPVLTAGAVDEILRLQAPVHLLARAAPR  
DTVLGGVPI PQGQNVLLLIAAANRDP AHFPDPDRFDPWRSGPPSLAFGLG  
LHYCLGA AVSRLEGRALPRLLSRFPRLRIMEQPVYSGSLFLRGIDKLSV  
SPGEGSTRE

>CYP244A4 (2562126096) *Salinispora arenicola* CNY679

MSTTTNTELTEAPETNMPVDPGLFDCMPDLIAAARVAPVVRIPYLGRHAW  
VVCDELVKQALTHPKMGKDIALVPEWMRQPGMLVTAQPDPEYARAMIMS  
DGENHARIRRIHAPVLSRPNTERWGERVADKVEGFLDELSQAGSGGSTEV  
NVVTNYTHKIPLAFISEMLGLPPEAEHRLRGITDIMLYSSDYAARREAIG  
GLFGAVEDWVRNPANLRDGVITGLLAASDGPDAAVTEGEVIVWTLGMIIT

GYETTGSLISTSLYEAIRRPPHERPKTDEDITAWIEETLRVHPPFPHPTW  
RFPLEDIELGGYLIPKGAPVQVSIAAANRKPGEADSFDERRGHGHLST  
GLGMHYCIGAPLVRLEAQIAVRGFLRRFPQARLSAETAVQWESEWMIRRM  
SVLPAVLS

>CYP245A7 (2562126100) *Salinispora arenicola* CNY679

MPSATLPRFALTGWSRENIVNPYPVYQRYREVASVHRGEPGGDAPDTFYV  
FSYDEVVQVLSSNCFGRGRSLDAAKASVPVPAEQKALRAIVENWLVFMDP  
PRHTELRSLNRSFSPRIVTELRPRIARIAQELL SRLGQQVDVDLVESFA  
APLPILVISELLGIPEERRAWLRANALALQEASSSRAGRDVDGYARAEVA  
AQEFTEYFREQVRLRRRAGGDLITILANAQERGAPVSLDAIVGTCVHLL  
TAGHETTTNSLAKAVLALREHPAVLDELRGAEGLTTDAVEEFLRYDPPVQ  
AVTRWAHQDTALGGCDIPGRSRVVALLG SANRDPARFPSPDVL DVRRPAD  
RHLSFGLGIHYCLGATLARAELEIGLQALLDGVPTLGYGTQHVDYADDLV  
FHGPSRLVLVNLGERCT

>CYP105CP2 (2562126263) *Salinispora arenicola* CNY679

MTKSMPVQDLPAFPIPRECYPYRPSAQHVSLRSGGPMKVRLYNGRTAWLV  
TDSAHARAVLSDYRRVSIKPYHGNYP LLNEEF EKVVDSGYADVLFGVDPP  
EHTRQRQMIMPSFTLRRTAVLRPDIQRIVDDKLDEM MRHGAPGDLVTEFA  
QPVPSPMVISFLLGVPWEDHEEFETPAHKLFVPELAEEATTEL GAYLERLI  
QKKEQPGGTPGGTGLLDDLIRDHLRAGALS RDELVHIAMAMLVAGTDTT  
NVISLGLTALLDNPDQWAALRDNPD ELIPGAVEEILRYTSLIEAFARVAV  
SDIELNGAVIKEGEGILISSAGVNFDPALAPDPGRFDIRRP RPSPFSFSH  
GIHRCPGDNLARLELEIAFRSLVTRMPNLRTAKPIDQIPSNNDGTLQRL  
YELPVVW

>CYP105CN1 (2562126265) *Salinispora arenicola* CNY679

MAAPAPQATPSTTPHPPSYPLPRECYPYRPSAGTAHLRDAGPVSTVRLYDG  
RTAWLV TGAAEARALLADSRVSNRADFPNYPVM DERHLSMRATREMAREE  
EGGFAAALFGMDPPEHTRQRQLLLPRFTVRQVAARRPAIQRIVDEHLDAM  
EANGSPADLVSAFATPVPTMVVCTHLGV PYPQDRTRFEPAVAGLFEPDRAD  
AAMAELTAYLHQLIETKQSEPGDGVIDHLIANHLRPGAIDRAELVAIASA  
ILVAGTVTTSSAIALGTLALLTAPGQYTALVDNPD LVP GAVNEILRYLSL  
VEQLARVATEDIEIGGKLIRAGDGIIVSFAAGNLDPNVTTHPDRLDVALP  
PTNH LAFSHGIHHCIGQN LALLELDIAFRALVSRFPTLRLAVPAEQ LPTY  
FAGDVPRLACL PVTW

>CYP107FS2 (2562126266) *Salinispora arenicola* CNY679

MPVPQGEQNLTTTEVFADPKALFATLGS RQPLHRISLPDGM PAVLVTGNRE  
ARQALSDPRLVRSITAAAPELHKYHPLASDDYALSRHMLFADPPDHGRMR  
KLVSTAFTRRRVEQMRPRIQQITDDLIDVIAAKGEADLVETLALPLPIAV  
ISEMLGVFPADRSEFERHAEVLTGINASSGFD AIIAAGRWFDEYLAGLVQ  
QRRREPQDDLISGMLAAQDKGDR LTDVELRSNALLLSAGFETTVNLIAN  
GLLALLRHPEAMAALRSEPNLMTTAVDELLRYDSPVSCVTYHFAQEPVEI  
GGFEIRSGEHVVIAAAAANHDPTVFAAPSRLDLRREGSGQILSFSHGIHF  
CLGAPLARLEGEIAFGTVLRRLAGRLAVPTDSL VWKASFVLHRLERLPV  
TFTPDRDPNPIDSVHTV

>CYP125G6 (2562126304) *Salinispora arenicola* CNY679

VPTLLNEHVSYDGA AIAIVDS DGATSWIRLAERVNRWVHLLRAHGLDTGD  
RLACVTGNRRETFEVLLAALHTGVTVVPVNWHLTVTEIGHILSDSGSRVV

ITEELHVKAVAAAADGTAGPVAGLVLGDRVEGFAAVEPLLAASPAEPE  
GQVCGATMLYTSGETGRPKGVVNNLFVTGAPYARVGRLCDYARSVLGVP  
RERMLLDGPWYHSSQLFFALLSLLQGSRLVIRPYFDPAATLKTIDDHRI  
VTHLVPTQLVRLLRVDALTRQMFSGASLRRVWHGGGPCPPEVKRSMIDW  
GPVLVEYYGATEGGVVTLIDSAEWLARPGSVGRAVPPSEVVVVDDGGQPV  
AAGQTGQVFFRRRTGNRFHYHNAPEKTQAAYLAPDTFTTYGEVGHVDEDSY  
LFLTGRAQDMIVSGGVNVYPAEVEAALLRHPVVRDAAVIGVADDEFGERV  
VGIVVPETAVDPDDLATHLDAHCRVSLAGFKVPRTYRVVESLPRDETGKL  
RKDALRSKFGWLSGAAMTVPRPATGQPTAHRPDIAHPTTYVSGVPHDEFA  
RRRDEPVGWVAEPVLTRHTAAGRTATRGSGFWAVTRYEDVVAASRRVTD  
FSSAAKGAFLLTDPRTPADLQQARQLLVNMDDPHHARLRKLVTSVFTPRAV  
RGLLASIDAHAAALVAKVVAAGEFDVVTDLAAELPLLVLADLLGVPKQDR  
ALLYGWSNHLVGFDDPDFGGGDIDAYRTAMAEAFQYALNLGVERRARPTD  
DLVSLLANAEVDGTRLTDREFCNFWLLLVVAGNETTRHLIAGTMQALTEH  
PGECARLVEGRVPMESAVEELLRWVTPIMQFRRTATRDTEIGGQAVTAGE  
KVVLYYTSANRDATVFAEPDRLDLGRTPNRQLSFGIGPHYCLGAHLARAE  
LTALLRVMSPHLGSLQLTGFPVSRLASNFVNGVKAMPAVIGSR

>CYP154M15 (2562126329) *Salinispora arenicola* CNY679

MNDKCPFAALDVTGQDLHGEEARLREQGPAVLVELPGGVKAWSINRYEVI  
RELLMDRRVTKNARKHWPFAFIKGEIPPDWEMISWVAMDNMVTAYGKDHVR  
LRKLVGRAFTQRRADALRPQVVALSTKLLDDLGAFTPPGEVVDLRERFAYP  
LPAMLVASLIGMSEAAALACSKVIDMMVHTNVSPEEAQAVLRGWRAAMAD  
LIESKRRTPGEDITTDLITAREEDGSRLSEAELADTIFAILGAGSETTIN  
FFDNAITALLSRPGQLQLRTGAVTWDDVIDEVLRVESPLAHLPLRYAVE  
DIELDGVTIPQGDPILVNYAAAGRDPALHGGTADEFDLARGDKTHLSFGY  
GPHYCLGAGIARMVATIGLSMLFERFPDLSLAVPVTELKRLPTFIMNGHQ  
TLPVRLTAHAR

>CYP211B2 (2562126497) *Salinispora arenicola* CNY679

MDVSEAIAVLISPSGRLDPYPTYEQRLAHGPVSQTTAGLFVVTGYAADM  
VLRDPRFVVLLDDDLRDDVFPHWQDSPAIXIARSMLRTNPPDHSRIRRLA  
AGAFTPRRVAAMREVVTQAQADELVDEMIRAGRDGARVDFMDMFAYPLPVA  
VICALLGVPAADRSRFRRWAGDLTGILEPEITPEELAGADAGADELRDYF  
TGLIEQRRRAPADDLTALVQAHDADGDRLSGEELLANLVVLLVAGFETT  
TNLLGNGLVLLTRPEAAAAALRDEPD LAPGYVDELLRYDSPVQLTTRTVR  
ESVSFAGTELPAGSWLLVLLGAANRDPRRFPDPARFDPGRAQSQPLSFGA  
GPHYCLGAGLARLEAQVAFPLLLRRLPELALAGRPSRRTRLTLRGYETLP  
ITVGAVTADRGTPAGVAPGTP

>CYP105BL2 (2562126646) *Salinispora arenicola* CNY679

MSSHSAAPDPETATPLHTLAPELAFFQFERSAPFDPPQAYTELSGRCPV  
APVSMADGKPSWLITSFEGVRTTSLDPHFSSDMSHPGFPNRTGKPVDDL  
KDTLGAMDGERHRYRRLMTGELTVRRAKAMRPVITQITDEALDQLAAAG  
PGADLVKHVAFVVPVSRVACHLVGIPLSDYELFTGMAATLMDSTSSDDQFA  
ALQNMVSYFDTLVTDREHHRDDLLGHMVRRYLATGELTRDMLIRLAWTT  
MAAGQETTAHMIIGLVAALLRHPDQLELLRREPHLLPGAVDELMRYLPLI  
QFGIPRVAMDDVEVDGQTVTAGEGVVALPPLANRDPVFERPDELDVRN  
ARQHLLTFGYGPHQCPAHALARLELEVYGRLLERFPTLRLADSDADLKVQ  
DKDIMYRVSELAVTW

>CYP166A4 (2562127004) *Salinispora arenicola* CNY679

MTDAISFELPWARTDKFDPPAVFDALREQRPLARMRYPDGHVGWIVSSYE

LVREVLGDPRFSHSCAVGHFPVTHQGQVIPTHPQIPGMFIHMDPPEHTRY  
RRLLTGEFTVRRTSRLTGHVEGVATEQIEVMREHGAPADLVATFARPLVL  
RVLSGLVGLPYGERDRYLHAVTLLHDAEADPAEAAAAYEQAGAYFDEVIE  
RRRRQPEDDLISTLVGDGELTGEELRNIVTLLLFAGYETTESALAVGMFA  
LLHHEDQLARLRADPTKIDAAIEELLRYLTVNQYHTYRTASEDIELHGEV  
INKGDSVTVSLPAANRDPARFACPAELDIDRETSGHVAFGFGIHCCLGQN  
LARVELRAGLSALLRAFPNRLRLAVPADEVPLRLQGSVFVAVKNLPVCW

>CYP105J3 (2562127118) *Salinispora arenicola* CNY679

MTDSVAFPQGRVCPHPAPGYRPLAVQRPLAQVTLYDGRRVWAVTTRDLA  
RRLLVDPRISSDRTPAWPAIVPIVAAAANDAQQKVLKIATALVGTGPE  
HKAQRKMLIPSFTFRMNALRPMIQEIVDQQLDDEMIKSGAPTDLIPAFAS  
AVPVTVLYRLMGLPDDDHGIFEKLSHQLLAGPNANEAYDQLMGYMSRLIA  
ERRRNPGEVGLDDLLAQHGANDDADHDELVSTLVVQVAGNHGTTGSMIAL  
GLFALLQHPEQLAELRADPSLMPTAVDELLRFLSVPDAVTRLAADDIEVE  
GTVIRKGDGVFFITSLINRDTDVHDAPNSLGWHHASAADHLTFGFGAHQC  
LGQSLARITMEIALGALIDRLPSLRLAVPAEEVPFLPAASLQVIAELPIT  
W

>CYP154M21 (2562127561) *Salinispora arenicola* CNY679

MEKCPYVLDRAGSDIHKEASNLARGPVTLVELHGGYTAWSVTSYEVAKQ  
LLMDPRISKNTKAHWPEFRDGNVPQDWELYTWVAMDNMQTRDGKEHDLRL  
KLVAFAFTGRQAVKSRPIIEEIVNRLDDLETAAPRGQAVDIKARYFYPLS  
TILVCDLLGIAEEDRDVILHGNVNSKTTNTAESEANLHQWQTALGRV  
ETKRRDPGDDLTTVIKAGEDEQTPLTDDDEVIGSLHLLIGGGTETTANVL  
CHTVVDMLTHPDQLAMVRSGAVSWESAWEEVVRKDGAVGSMPPFRCATDDV  
EIGGVTTIAKGDVLVLINYAAAGRDPERYGDAAAEFDITRADKANLSFGYGR  
HRCLGPALATMEAMVALPALFDRFPNLALAVPPNELKPPQGTFFNGYAEV  
PLLLRS

>CYP154M13 (2562127562) *Salinispora arenicola* CNY679

MSTGRPVVLDPTGRDIHGEADHLRALGPATLVELPGGVLAWSINSYEVGK  
ALLSAPNVSKSARRHWPAYNGEIPPDWEMISWVAMDNISTTFGGDHRRRL  
RRLTAKAFGSRRAEQVRPMATHMVNTLLDRMADAADAGEVVDLKAAAFAYP  
LPGMLVAELIGMSEEARVAAAKVIDMMTATNITPEQAQGVLLGWRDAITD  
LIAALKRAQPGDDITSDLIAARDEDGSLLTEQELVDITFAILGAGSETTIN  
FFDNAITQLLTHPEQLELVKSGQVSWDDVIEEVLRLSPLASLPMRFVE  
DIQLDGVTIHRGDPILINYAALGRDPALHGESAGVFDVTRQHKEHLSFGH  
GAHYCLGAGIARMVAKTGLSALFERFPRMTLAVSAKDLVPYPTFIMNGNR  
QLPVHLSGALTWREGEQSALGRA

>CYP105W2 (2562127574) *Salinispora arenicola* CNY679

MTGYQDRPTGDQPGAPVPSGSTDPGIGAFPLPRRCFFSPPAEYARLRAEH  
PVVRLPMLGGDTAWVVSRRHADVRQVLS DPRMSADRRRP GPFKFAPTTEGQ  
RQASFANFRPPLNWLDPPEHAICRRQIVDEF SVRRVRQSRALVERVVDTH  
LDALTAAPGADLVSTFAYPVPSQVICEVLGVYPYGEHEFFERRSTLMFR  
STPADERARCAIREDFLDVVVTDKEHRPGDDVLSRLLYRQRRAGVDHE  
AVVSMAFVLLVAGHVTTSNMLALSVLALLTHPARLARLRAEPPERFPAAVE  
ELLRYFTVVEAATARTATAEVTIGGVTTIAAGEGVVALGQAANRDP RVFEH  
PDEFDPDRDARAHAFGHGRHICPGQHLARLEMEVALSRLFRRLPGLRLT  
MEVSDLPLKEDSNIFGLYALPVAW

>CYP248A2 (2562127582) *Salinispora arenicola* CNY679

VLADAVTAFDPTAVDVRRDPYPSYHWLLRHDPVHRGAHQVWYVSRFADV  
AVLGDERFARTGIRRFWTDLVGPGLLSQIVGDIILFQDEPDHGRLRGVVG  
PAFSPSALRRLEPTIEATVNDLLRPARALGAMDVVADLAYPLALRAVLEL  
LGLPAGDANAVGRWSRAVGRTLDRGATAEDMRRGHAAIAEFADYVERALA  
ERREDGADLLALMLAAHRSQMSRNEIVSTVVTFIFTGHETVASQLGNGL  
LSLLDHPEQLELVRRQPHLVPPQAVEECLRFDPVQSNTRQLAADVELHGR  
RLRRDDVVVVLAGAANRDPGRYDRPDELDIRRDVPVPSMSFGAGMRYCLGS  
YLARLQLRTALGAMVALPDLRLVCNPNELAYQPRMTMFRGLTRLPPVAFTPA  
G

>CYP154M20 (2562127603) *Salinispora arenicola* CNY679

MERCPYVLDRAGRDLHGEAKALRARGPVTLEVELHGGYTAWSVTSYEIAKQ  
LLVDPRIKNTKETWPEFREGKVPQDWELYTWVAMDNMQTRDGEHDLRL  
KLVAQAFRTTRQVAKVRPMIEDIVDRLLDDLEKVPAGEVVDIKGRYFYPLS  
TILVCDLLGIPEADRAEALHGTVVNARTTNSAESEANLHQWQSALSKLV  
ETKRREPGNDITTLIIKAREDEQAPLTDDEVIGSLHLLIGGGTETTSNVL  
CNTLIDLLTHPDQMAMIRSGAVGWEEAAWEEVVRKDGAVGSMPPFRCANADI  
EIGGVTIAGKDLVLINAAAAGRDPERYGDTTAEFDITRADKTNLSFGYGR  
HRCGLPALATMEAMISLPALFERFPDLVLAVPRDELKPQGTFFVNGYAEV  
PMLLRS

>CYP107FJ2 (2562127610) *Salinispora arenicola* CNY679

MSETLSTSVLLADAAEQRAWRAKLRGAGPVHRITTSGETGWLIVGHEEA  
RNALVDLRLQGRATATVGHGRMPEDLERALNSHMLNVGPPDHTRLRLRLVS  
AAFTRRRIEQMRPRIQELTDELDDGLAGADEADLVAGLALPLPMRVLVDL  
FGIPAEDCADFNVTWKVLTSAGAVDLRLTTAAGEMVAYLRGLLDRKRQV  
PESDLSALVAVRDGADRLSDELTSMVYLLLTAGYETTVNLIGNGLLNL  
LANPEQLVAFKADPDLQPQVVEEAMRFDSPVQIAVRHSTEPVEIAGQAIP  
SGALILVSLWANRDPDRFTEPEVFRVDRQDNQQLGFGYGFHHHCIGAPLA  
RMEGTVAIGTVIRRFAPALRLAHPASSLTWRASMVMHGLTALPVHLR

>CYP107EU1 (2562127619) *Salinispora arenicola* CNY679

VTIGQTLPLVYSPEFTRDPYAI FARLREQAPVCRVTTHRGMSAWMVTRH  
ADVALLADNRLAKDGNRIGELIPRHSTLTGAATGFPPGLTTNMVNSDPP  
DHTRLRHLVGREFTGHRVEGLRPRIEEIVDDLLDGVAACGDEADLAETLA  
RRLPIAVIGELLGVPEADRAEFFRWADTLYGGTASPEALGQAYNAIVDYL  
GRLCDAKRDPVADDLLTALVQVSADEDRLSREELVSMALLLLVAGHETTS  
KQISNGVLALLLNPEQLKLLKAQPARTAGAVEELLRFEGPSLSASLRFTT  
EPVEVAGVVIPEGEFVLLSLASGNRDPEKFPDPDRLDITRSTQGNLAMGH  
GIHHCVGGAALARLELEIVLIRLVARFPQMQLAVEADDLEWLNVNSFFRAPL  
HLPVSLRR

>CYP105AB8 (2562127867) *Salinispora arenicola* CNY679

MTETASSRLTDTEFPVQRECPFAEPVEYEQIREQSSIAMVRLTGGGEAWW  
ISGHEQGRAVLADRRFSSDRKANFPFVSTDPAIRKRLHAQPLSLISMDG  
AEHTQARRALIGEFTVRRLAALRPRIQQIVDQCIDEMLTDDQHCADLVKA  
LSLPVPSLVICELLGVYPYADHDFEQEHTATLVRRNTASEVRQHSIDELNA  
YLGELIDRKLASPDLLGRQIARQHRDGTFRSSMVSLAFLLLVAGHET  
TANMISLGVVGLLQHPEQLAMIKNDPKTPLAIEELLRFFTIVDSVTSRV  
ATEDVRFGDTTINAGDGVVVSGLSADWDPTVFADPDRLDLERGARRHHLAF  
GFGPHQCLGQNLARLELQIVFDTLFHRIPTLRLAAPLDKIPFKTDAAIYG



ARELPVAW

>CYP107AX14P (2562128189) *Salinispora arenicola* CNY679

VTSPPHVAFGHLLLRDPHGYNALRGQAPVHHIRTPDGAPAWLVMRYDDV  
RAALTDPRLSVDKRFSDTDGEHGSSLPPELDAHLLNRDPPDHTRLRLRLAA  
AAFTPRRVADQAPAVATIVDALLDGIAGQDQAEIIGALASPLPLQVMHEL  
LGLPTQTSVDFRNWTNTLLSADANQPAQSRSAMATMRRFLMGQLARKRAQ  
PGDDLLTGLLAARDDDDRFDTDELLAMVFLLMFAGYDNTAALIGNVTHAL  
LTDAGLHDAVRAGSVDLDSVVDEVLRWNPSFPLAVRRFAREFVTPSRQAI  
ASGSAWPARTATPHSSPNPTN

>CYP105CH1 (2562128255) *Salinispora arenicola* CNY679

VSSLPLPTYPKLRDPADPFLPPAEYLAIQSEKPIAKVLLPSGRPTWLITG  
HALARQVLTEPCVSVDRRHPNFPYPVPNPDAVVAQVARWTYILLGDDPPL  
HTERRRLLISEFTVRQAQAMRPRIQQLVDFHLEQLIAAGPGADFSKHFAM  
KVPSAVICEMLGVPFADHDYFQERTALQLRRDVPVAAQKQAIIDELLAYFE  
QLIQEKGSHPGDDVLSRLIVSNRETEAFDHEALVALGLLLLLVGGHETTAN  
TLTLATATMLERPEIAEQLRTPSLMPSAVEEFLRYFSVAVAVSRIATAD  
LQVGGQLVRAGESMLLVLNTIARDGTVFPEPHRLDIRRNARNHLAFSHGI  
HQCMGQNLARVEMQIALDTVLRRLPGLHLVTPFEELPFKYRHLVWGIEEL  
RVAW

>CYP244A7 (2562128414) *Salinispora arenicola* CNY679

VRVTSSNLAAEPEVTMPVDLRPTDCLPELLAAARVAPVVRIPIYLDQHAW  
IVCDRELVKQALTHPKLGKDITLAPDWMRKPGQMTAMPPEYARMMITS  
DGENHSRIRRLHAPVLSRPNTERWGKRVATLADELLDELDSGDNAEVNVV  
TDYTHKVPLAFTSEMLGLPPGAERRLHDITEVMLYSADYALRQQAEEELF  
EAVQDWRNPAGLYDGVITGLLASSDEEDVTVTEGEVIVWTLISLVINGYE  
TAGSLISAALYEALRRPVREPRHTDEEDIAAWIEETLRVQPPVPHTTWRFA  
LEDLSLGGYLIPKGAQVQVSI AAANRDPNEDTDGFD AERRGRGHL SFGRG  
VHYCIGAPLARLQAQIALHGFLQRFPRARLSADTAPQWESEWMIRMSVL  
PALLA

>CYP162P1 (2562128465) *Salinispora arenicola* CNY679

MGLPSEVDLADPDLYAEGDPDAEWAWLRAHRPVYRNPAGATAEFWALTRY  
RDALQVYRDPSTFSSSERGMVLGVDPVAGDPAAGRMLVVTDPVRHPKLRRI  
VSGIFVPRMTMRLEGRVRSVLDQQLLHRVVDGAGRCDFVNDVAARLPVAII  
CELLGVPADEQDWMYHLTSTAFGGGDPAGSAEVS AVERAEAYGDILLYYG  
ELAAERRRRPGDDLVTLLVHADLDGEPLDVEDVLVNCTNLIIGNETTRH  
AASGGLLALAQRPELWRRRLRETPTAVPTAVEEVLRWTTPGMHVLRATRD  
TEIGGVPIRAGERVVVWNAANRDEDFADPQRFIDRSPNRHIAFGQGG  
HHCLGAALARLELTILFEEMAKQVTNVRLTGPPVRRVRSVLRGIRALPVE  
LVT

>CYP1198B1 (2562128996) *Salinispora arenicola* CNY679

MSGELTDQRTAPGAGGNPLRSIMDHGIRANPYPLFGELREAGPTAVEDGS  
VVLFGHEYEHCSQILRHRDMGSDTSEAPSIKGFVVDDAERAGSSIFFMDQP  
GHGRQRKLVSFSFTPRIVKSFGPQITHIVDGLFEDFRDKGELDVVTDLAY  
PVSIGIICDLFGIPDDERDMLKEWSDDLALSTELPTLGAAIGVLNVFTRD  
EINRFGSVAMAAHAYFADLIHRRRKNPGDDLVSLLATESNGERLTRFEV  
TSVLATLFVAAHESTTNLISGGILALLRNQDQMAVLRENPGITNVVDES

LRYPDPVHLAARMARARTTIGGYDLDPGTIVVVLMAAGNRDPRAYENPDV  
FDVNRKIRNVSLAFGAGAHFCIGSGLAKLEAEIAISAFQRLKHPEVDES  
SLEYRRHIVVRGLEHMKVSFQP

>CYP105BL2 (2516006570) *Salinispora arenicola* CNX891

MSSHSAAAPDPETATPLHTLAPELTFPQFERSTPFDPPQAYTELSGRCPV  
APVSMADGKPSWLITSFEGVRTTSLDPRFSSDMSHPGFNRTGKPVDDL  
KDTLGAMGGERHRYRRMLTGELTVRRAKAMRPVITQITDEALDQLAAAG  
PGADLVKHVAFVVPVSRVACHLVGIPFSDYERFTGMAATLMDSTSSADQFA  
ALQNMVSYFDTLVTDREHHRDDLLGHMVRRYLASGELTRDMLIRLAWTT  
MAAGQETTAHMITGLGVAALLRHPDQLELLRREPHLLPGAVDELMRYLPLI  
QFGIPRVAMDDVEVDGQTVTAGEGVVTLPLPLANRDPVFERPDELDVRRN  
ARQHLTFGYGPHQCPAHALARLELEVVGRLLEFPTLRLADSDADLKVQ  
DKDIMYRVSELAVTW

>CYP1005A1 (2516006744) *Salinispora arenicola* CNX891

VSAVLFRSWTKTAGTRWPDVTRVADQSGTEHLVVTRHALVRQVLTQATY  
RPDNAMEAVTPIPVAVLRVLAGHRFRLPPTLANNGGVSHPAIRALVADAL  
HPTKVAAQRPWLTGLVADRVASIRTTLDSSGGPVDLYTDLTADLPLLVLAR  
LVELPDAPVNAVKKQFARAALFLWAPLDADRQLALADEVGRFHQVLRIFA  
DTGGGLAAALRATGHSPDVLVGALFFLLVAGQETTSQFLTLHRLSGEP  
TIRAALRAGSISVADVVEEGLRLEPPIVTWRRVAAVDSTLGGTTVAAGTS  
VLLWLARAGRDPVVAAPDEFPRPGQSGRRHLAFGAGAHRCCLGDQLARME  
AAVVVEQATPLLDGVTVVRPPWYPDNLTFRMPDAFVVRR

>CYP211B2 (2516007610) *Salinispora arenicola* CNX891

MDVSEAI AVLISPSGRLDPYPTYEQ LRAHG PVSRTTAGLFVVTGYAEADM  
VLRDPRFVVLDLDDLRDDVFPHWQDSPAIXIARSMLRTNPPDHSRIRRLA  
AGAFTPRRVAAMREVVTQADELVDLMIRAGRDGARVDFMDMFAYPLPVA  
VICALLGVPAADRSRFRRWAGDLTGILEPEITPEELAGADAGADELRDYF  
TGLIEQRRRAPADDLTALVQAHDADGDRLSGEELLANLVVLLVAGFETT  
TNLLGNGLVVLLTRPEAAAAALRDEPD LAPGYVDELLRYDSPVQLTTRTVR  
ESVSFAGTELPADSWLLVLLGAANRDPRRFPDPARFDPGRAQSQPLSFGA  
GPHYCLGAGLARLEAQVAFPLLLRRLPELALAGRPSRRTRLTLRGYETLP  
ITVGAVTADRGTAPGAVPGTP

>CYP245A7 (2516007809) *Salinispora arenicola* CNX891

MPSATLPRFALTGWSRENIVNPYPVYQRYREVASVHRGEPGGDAPDTFYV  
FSYDEVVQVLSSNCFGRGRSLDAAKASVPVPAEQKALRAIVENWLVMFMDP  
PRHTELRSLLNRSFSPRIVTEL RPRIARIAQELLSRLGQQVDVDLVESFA  
APLPILVISELLGIPEERRAWLRANALALQEASSSRAGRDVDGYARADVA  
AQEFTEYFREQVRLRRGRAGGDLITILANAQQRGAPVSLDAIVGTCVHLL  
TAGHETTTNSLAKAVLALREHPAVLDELGAEGLTDDAVEEFLRYDPPVQ  
AVTRWAHQD TTLGGCDIPGRSRVALLGSANRDPARFSPDVLVRRPAD  
RHLSFGLGIHYCLGATLARAELEIGLQALLDGVP TLGYGTQHVDYADDLV  
FHGPSRLVLVNLGERCK

>CYP244A4 (2516007813) *Salinispora arenicola* CNX891

MSTTTNTELTEAPETNMPVDPLGFDMPDLIAAARVAPVVRIPYLGRHAW  
VVCDELVKQAL THPKMGKDIALVPEWMRQPGLMVTAQPDPEYARAMIMS  
DGENHARIRRIHAPVLSRPNTERWGERVADKVEGFLDELSQAGSGGSTEV

NVVTNYTHKIPLAFISEMLGLPPEAEHRLRGITDIMLYSSDYAARREAIG  
GLFGAVEDWVRNPADLRDGVITGLLAASDGPDAAVTEGEVIVWTLGMIIT  
GYETTGSLISTSLYEAIRRPPHERPKTDEDITAWIEETLRVHPPFPHTW  
RFPLEDIELGGYLIPKGAPVQVSIAAANRKPGEGADSFDAERRGHGHLSE  
GLGMHYCIGAPLVRLEAQIAVRGFLRRFPQARLSAETAVQWESEWMIRRM  
SVLPAVLS

>CYP105CP2 (2516008441) *Salinispora arenicola* CNX891

MTKSMPVQDLPAFPIPRECYPYRPSAQHVSLRSGGPMKVRLYNGRTAWLV  
TDSA HARAVLS DYRRVSIKPYHGNYPLLNEEFKVVDSGYADVLFVGDPP  
EHTRQRQMIMPSFTLRRTAVLRPDVQRIVDDKLDMMRHGAPGDLVTEFA  
QPVPMSMVSFLLGVPWEDHEEFETPAHKLFVPELAEEATTEL GAYLERLI  
QKKEQPGGTPGGTGLLDDLRDHLRAGALSRDELVHIAMAMLVAGTDTT  
NVISLGTALLLDNPQWAALRDDPDELIPGAVEEILRYTSLIEAFARVAV  
SDIELNGAVIKEGEGILISSAGVNFDPALAPDPGRFDIRRP RPSPFSFSH  
GIHRCPGDNLARLELEIAFRSLVTRMPNLR TAKPIDQIPSNNDGTLQRL  
YELPVVW

>CYP105CN1 (2516008443) *Salinispora arenicola* CNX891

MAAPAPQATQSTTPHPPSYPLPRECYPYRPSAGTARLRDAGPVSTVRLYDG  
RTAWLVGTGAEEARALLADSRVSNRADFPNYPVMDERHLSMRATREMAREE  
EGGFAAALFGMDPPEHTRQRQLLLPRFTVRQVAARRPAIQRIVDEHLDAM  
EANGSPADLVSAFATPVPTMVVCTHLGVYPYQDRTRFEPAVAGLFEPDRAD  
AAMAELTAYLHQLIETKQSEPGDGVIDHLIANHLRPGAIDRAELVAIASA  
ILVAGTVTTSSAIALGTALLLTAPGQYAALVDNPDLPVGAVNEILRYLSL  
VEQLARVATEDIEIGGKLIRAGDGIIVSFAAGNLDPNVTTHPDRLDVALP  
PTNHLAFSHGIIHCIGQNLALLELDIAFRALVSRFPTLRLAVPAEQLPY  
FAGDVPRLACLPVTW

>CYP107FS2 (2516008444) *Salinispora arenicola* CNX891

MPVPQGEQNLTTTEVFADPKALFATLGSRQPLHRISLPDGM PAVLV TGNRE  
ARQALSDPRLVRSITAAAPELHKYHPLASDDYALSRHMLFADPPDHGRMR  
KL VSTAFTRRRVEQMRPRIQQITDDLIDVIAAKGEADLVETLALPLPIAV  
ISEMLGVFPFADRSEFERHAEVLTGINASSGFDAIIAAGRWFDEYLAELVQ  
QRRREPQDDLISGMLAAQDKGDRITDVELRSNALLLLSAGFETT VNLVAN  
GLLALLRHPEAMAALRSEPNLMTTAVDELLRYDSPVSCVTYHFAQEPVEI  
GGFEIRSGEHVVIAAAAANHDPTVFADPSRLDLRREGSGQILSFSHGIHF  
CLGAPLARLEGEIAFGTVLRRLAGLTLAVPTDSL VWKASFVLHRLERLPV  
TFTPD RAPNPIDSVHTV

>CYP248A2 (2516008503) *Salinispora arenicola* CNX891

VLADAVTAFDPTAVDVRRDPYPSYHWLLRHDPVHRGAHQVWYVSRFADVR  
AVLGDERFARTGIRRFWTDLVGPGLLSQIVGDIILFQDEPDHGRLRGVVG  
PAFSPSALRRLEPTIEATVNDLLRPARALGAMDVVADLAYPLALRAVLEL  
LGLPAGDANAVGRWSRAVGRTLDRGATAEDMRRGHAAIAEFADYVERALA  
ERREDGADLLALMLAAHRSQIMSRNEIVSTVVTFIFTGHETVASQLGNGL  
LSLLDHPEQLELVRRQPHLVPAVEECLRFDPVQSNTRQLAADVELHGR  
RLRRDDVVVVLAGAANRDPGRYDRPDELDIRRDPVPSMSFGAGMRYCLGS  
YLARLQLRTALGAMVALPDLRVVCSPNELAYQPRTMFRGLTRLPVAFTPA  
G

>CYP105W2 (2516008510) *Salinispora arenicola* CNX891

MTGYQDRPTGDQPGAPVPSGSTDPGIGAFPLPRRCPPFSPPAEYARLRAEH  
PVVRLPMLGGDTAWVVSRRHADVRQVLS DPRMSADRRRP GPFKFAPTTEGQ  
RQASFANFRPPLNWLDPPEHAICRRQIVDEF SVRRVRQSRALVERVVDTH  
LDALTAAPGADLVSTFAYPVPSQVICEVLGVYPYGEHEFFERRSTLMFRR  
STPADERARCAREIRDFLDMVVT DKERRPGDDVLSRLLYRQRSAGGMDHE  
AVVSMAFLLL VAGHVTT SNMLALS V LALLTHPARLARLRAE PERFPAAVE  
ELLRYFTVVEAATARTTTAEVTIGGV TIAAGEGVVALGQAANRDPRVFEH  
PDEFDPDRDARAHLAFGHGRHICPGQHLARLEMEVALSRLFRRLPGLRLT  
MEVSDLPLKEDSNIFGLYALPVAW

>CYP107Q4 (2516008914) *Salinispora arenicola* CNX891

MTTTAETS AETID LFSPEVVAD PFGWYARLREETGPTTGTLNIGTMMGGP  
EMWLVTTRYEDVRQVLTDP RFLTNPPADSPLEDIRAGVFKRLDFPPDLIPW  
MANLLNVSDGEDHTRLRKLVSYALTAHRIGKLRPRVEKITADLLDKLAED  
GKDGSPVDLVEEYCYPLPVTVICELVGIDEPDRPHWRAWGDSMATMNGER  
IPTTLVKCIELARELIAKRR AEPQDDLV TALVQAQAE DQNRVSDDEIIGI  
LFSLVTAGHQTTTYLIGNSVILLLENPDQLARLKENPSMWPQAVRELQRL  
GPIQFAQPRFPSEDIELGGVTIPRGAPVAPLLLAANTDPRRFPDPNKLI I  
DRLAVGSEHGLGFGKGIHRCLGQHLAYQEA E VALQGLFTRFPDLSLAVPR  
EEIPWILRPGFTRTRTLPLKLV

>CYP105G5 (2516008915) *Salinispora arenicola* CNX891

LTIETTETPTDDSLRAPLPRQFMQRDDPSKLPALAAALAEQSPVGRSTL  
PDGDPFWMVSGYDEARAVLS DPRFSSDRFRYHPRFKKLSGELGERLRNDK  
ARAGSFINMDPPEHTRYRKLLTGQFTVRRMRQLTVRIEQIVTEQVDVMLA  
EGNSADLVSAFAVPVPSLMICELLGVRYEDRTEFQRR AAGLLQTDLP IKQ  
AVENLEAQRAFMQRLVTDKR RTPADD MISGLVHHAGAEPPLTDDELVGIA  
TLLL FAGLDTTASMLGLGMFMLLQRPEQMAVLRDDPSRIGDAVEELLRYL  
TVVSTGLFRFAKEDVVLGDEHIPAGSTVVVSLMAANRDGRHWPEPETLDV  
TRVRSSHLAFGHGVHQCLGQQ LARIELTVGITELLRRLPNVRLAVPPADV  
PLRNDMITYGVHRLPILWDTP

>CYP1051A1 (2516008948) *Salinispora arenicola* CNX891

MATDAAITRARTVPAWKALPAAVRGAHRALVDVGNWSDGDVVRVSLGVSR  
PYLVTNPAHVQEV LHERAAIYPRGDD TTLWRSVRKLVGDGILAEGDAWAA  
SRRVLAPMFRPARINAMVDTMADA IAGAVDDLHGAATAGT PIDVGRELSR  
IVCSAIMRVFFADRITVRDALRIMKAQETIVTAMAPRILAPLVPWWI PMP  
GDRRFRAAVRSID DILLPVLRQAQRQPDDGDDL SRLV RARADDGRALSE  
KMRDDLVSMVAVT TETSTVVL TWLWPLL ANHPDVANRLYDEIDRVVGGG  
PVRGDHLAELTYTRMVLD ELLRLYPAGWILPRRAATTDVLGGVRINKGAT  
VILSPYVTQRMTAWWGPTAEAFDPERFAAGREAADGRHRYAYYPFGVGMH  
RCLGEHLFNLEAILIVATLLSRFRFALTDTSMPGVKVA ASTRPARTVEMV  
LKPVAPV PAR

>CYP211C1 (2516009248) *Salinispora arenicola* CNX891

VVDVEELLTRLYSAQGRQDPFPVYADLHAQGPIAALPPEPERRRVA AVAV  
GYDLVGAVLRDPEWSKAPPPGWTEQEILRTLQTSMMFINPPDHGRMRHVF  
AGTFTPRRLGALEPVVNRVADELLDRMADAGAGGLDFVAEFAYPLPARVM  
AEFIGIPETELDWYRERVDVIDAFLDVAGKTPQRLAAANAAGAE LRAFYG  
ELLARRRHTPGEDLISGLVEAVDAGGVELTEDELVS NLIVLFNASFVTTV

YMLSNGLPVLLAHPEVAAALATDPVLTAGAVDEILRLQAPVHLLARAAPR  
DTVLGGVPIPIQGQNVLLLIAAANRDPAHFPDPDRFDPWRS GPPSLAFGLG  
LHYCLGAAVSRLEGRLLALPRLLSRFPRLRIMEQPVYSGSLFLRGIDKLSV  
SPGEGSTRE

>CYP105CT1 (2516009362) *Salinispora arenicola* CNX891

MNSPNHMPADRSLTAPTSGCPMALSRGRVGLDVADEIGELRDGGRLGRIT  
TAFGQEATLITRYDEVRAQMADSVVFNVAGVPSPPALVDGGFDTESVRRR  
RTVGNLIMLDPPEHTRLRRMVAAWFTTRRVERLRPRVVEIIDAALDEMER  
SGPPVDLVAMFAKTVPITVICELIGVPEELRERYRRRAERAVSASAVSTP  
LDELRLRLREAGWVSRELIEYHRENPSDDIIGMLLREHGTDSDDDGITDDE  
LVGLANALLIAGHETTTQMLSMGTLALLRHPDQLALLRDDPSIVAGAVEE  
LLRYVGVVLHGGFVRVATRDTRLGGHRIHAGELVVPALTAANRDPRLTDTG  
DRLDITRPPTSHVAFGHGVHFCIGAPLARMELREAFPALLRRFPGLRLAV  
PDSELEFTQGT TVYSLRGLPVTW

>CYP154M5 (2516009378) *Salinispora arenicola* CNX891

VEQSCPYKLDVTGRDVHAEGEAIARARGPVAQVELPGGVQGWSVTGYQAAR  
QVLADPRFAKDPKKWPAYTSGAIPPNWPLIGWLLMDNMTTNDGADHQRLR  
KLVS HGFTPRQVERTRPLIVKIVNDLLDGLSSAGPDEVVDLKGRFATPLP  
ARVICDMFGVPEALRASVLRGAQVNVVTSSISGEEAEANVEQWHRELLELV  
EAKREKPDEDMASLLIAAKEEDGSTLTQEEVVGTLHLMLGAGSETLMNAL  
SYAVLGMLSNPGQYEMVRNGTSSWDDVIEETLRAQAPVAQLPLRYATEDV  
AVGGAVIKAGDPVLMGFTAIGRDPVHGETAGDYDITREDKTHLSFGHGV  
HFCLGAPLARLELKIALPALFERFPMNTLAVRPAQLEPQGTIFMNGHREL  
PVR LGQPATVLA

>CYP125A41 (2516009512) *Salinispora arenicola* CNX891

MTEPRI PAGFDFTDPEVLAHRVPREEFAELRR TAPVWWNAQPRGSAGFDD  
DGYWVVTRYADVMTVSRSDTYSTRENTAIARLRPDTTREDIEMQRVIML  
NVDPP EHTKLRAIVSRGFTPRAINALRGSLAERAHIVRDAAVRGVGD FV  
TDVACELPLQAI AELIGVPQHHRKVFWDWSNQLIGYDDPAYGTDPLTASA  
ELLYAMEMAERQRSPSDDLVT KL VNAQIDG EHLTTDEF GFFVMLLAVA  
GNETTRNAITHGMVAFLDNPEQWELFKAERP KSAVEEII RWATPVNVFQR  
TALVDTVLGGQAI SAGQRVALFYGSANFDEAVFEDPERFDITRSPNPHLG  
FGGSGAHFCLGANLARLEIELIFNSIADHLPDIRKVAAPQRLRSGWINGI  
RQMPVRYR

>CYP105AB8 (2516009903) *Salinispora arenicola* CNX891

MTETASSRLTDTEFPVQRECPFAEPVEYEQIREQSSIAMVRLTGGGEAWW  
ISGHEQGRAVLADRRFSSDRKANFPFVSTDPAIRKRLHAQPLSLISMDG  
AEHTQARRALIGEFTVRRLAALRPRIQQTV DQCIDEMLTTDQHCADLVKA  
LSLPVPSLVICELLGV PYADHDFEQEHTATLVRRNTASEVRQHSIDELNA  
YLGALIDRKLASPD DDLGRQIARQHRDGT FDRSSMVSLAFLLLVAGHET  
TANMISLG VVGLLQHPEQLAMIKNDPKTPLAIEELLRFFTIVDSVTSRV  
ATEDVRFGDTTINAGDGVVVSGLSADWDPTVFADPDRLDLERGARHHLAF  
GFGPHQCLGQNLARLELQIVFDTL FHRIPTLRLAAPLDKIPFKTDAAIYG  
ARELPVAW

>CYP113T2 (2516010391) *Salinispora arenicola* CNX891

MSVTKCVWTAPPADEEALAGWFRDREPVERAPGGGWHVFGYPEAKAVLAD

HGAFSNGVTRPVPDDSPMRLYREGNLTWSDPFRHRQLRALLTQVFTPRIV  
AGLEPMIEETVASALAGIRHKDQVLFVREFASPVVATVIARMLKISDNGL  
RLFQQWSQALLAIADPGAERNGLQTVLTQTQIAEAFHRLIARRRAAPSD  
DLASGLMAAEVNGERLSDAEIAGLIALLMSTGQASTLTLVNSIIVLARHP  
ESAAMLRTPELLAPAIDEVMRYRSETTRVDRKTVRDVVVGGEIPAGQT  
VSVWIAAANRDPVFERPDVFNIERSPNPHIAFGHGIHYCLGAPLARVEI  
PAALRRLLGATAGFTVDPAGTRLLDPRLMSGASEVAVRFDWKQA

>CYP285A9 (2516010401) *Salinispora arenicola* CNX891

MKLTKPAEHEPVDLEKADLVDPVHVGEGDPHAIWHAMRERDPVHWQQVDE  
RLGYWSATRYEDVARVLRDHRVFTSEHGTLNLLGKKDPASRKQLPATDP  
PRHTKMRSVPQALNSKVLERHREQIREEAQRLLASVPDGEEDFAEMVG  
KLPMAVTGTLMGLDREDWPQLTYLTSQAIAPDDPEFVLPEGGEATLARAH  
RELFAAFEQSLSRKKGKNGDLIDVLRTEMDDGRKLRPGEIVSNSYSLL  
LGANVTTPHPVNAAMGELAKDGKYADWASHPELFESGINEALRWSSPASH  
FLRYAKTDVELSGVTIRQGEVAAWIGSANRDATVFPDPYEFDIRRDPRN  
HLAFGVGPHYCVGHAVARLALHELFEGLLDQFSGFEPAGEPQHLHSNFIA  
GMKHLPLVATRRAEERNRG

>CYP208A12 (2516010420) *Salinispora arenicola* CNX891

MTLDTITPRVPLGPPRTAALRMLLVMKRDRLGMLTSAAARYGDASRLPVG  
HKALWFFNHPRYAKHVLADNSANYHKGIGLVHARRALGDGLLTSEGLWR  
KQRKVIQPAFQSRRIAQQAGMIAEEAFALVERLRARAGAGPVELTAELTG  
LTLGVLGRSLLDADLAGFDSIGDSFATVQDQAMFELETNLAVPMWIPLP  
QIRFERRARRKLQAVVDTLVDGRAGNLADRVDVLSRLILSARGEADPRVGR  
ERLRDELVTLLLAGHETTASTLGWTLSLIDRHPGVWERLHAEAVEVLGDR  
LPEYDDLRLRLRYTVMVVEEAMRLFPPVWLLPRRALAPDTIGEYRVPANAD  
VVISPYTLHRHPEFWPNPERFDPERFAPGQAADRPRYAYLPFGAGPRFCV  
GNNLGMMEAVFVIALLCRHLRLTGVPGYRLVPEPMLSLRIRGGLPLVVRP  
VS

>CYP1269A2 (2516010699) *Salinispora arenicola* CNX891

MTTPRTDRPYGTPGIGSAVPERGTVRTEGMALDAGQRRRLQLAQGLLWLR  
AASGDPFAALLRDHDEDEAALYARLGGGAPIWRSSTGTWVTRHRTATAL  
TADPAVEDRIVGWRPLGIPVMPLGEQDLGLHPENREALLSLARAEEVAEDA  
LVERRPRWAVAVRRRLDRAGDGRIDLAELAAGISVDMLAEQLDLPGTEMG  
WFSDLASHAGLAADGLLCPQDMRRTDMLAGIAELRERFAGRPFAMILAV  
FGVRVCADLLRNALAALLAEPAGWAGLRAEPASAAAVVDEILRHDPPVRV  
QLLEAVADTTAHGVPI TAGDQISVLLAVANRDAEVFPEPDVYRPGRPVSP  
DRPVLLPGWPAGPVLPLARAQTVTALTELAGRFVLEAAGPVIREVRAPV  
TRAIRELPARADRRVRRP

>CYP105J3 (2516011001) *Salinispora arenicola* CNX891

MTDSVAFPQGRVCPHQPA PGYRPLAVQRPLAQVTLYDGRRVWAVTTRDLA  
RRLLDVDPRISSDRNTNPAWPAIVPIVAAVNDAAQQKVLKIATLVGTDGPE  
HKAQRKMLIPSFTRRMNALRPMIQEIVDQQLDEMIKSGAPTDLIPAFAS  
AVPVTVLYRLMGIPDDDHGIFEKLSHQLLACPNANEAYDQLMGYMSRLIA  
ERRRNPGEGLVDDLQAQHGANDDADHDELVSTLVVQVAGNHGTTGSMIAL  
GLFALLQHPEQLAELRADPSLMPTAVDELLRFLSVPDAVTRLAADDIEVE  
GTIIRKGDGVFFITSLINRDTDVHDAPNSLGWHHASAADHLTFGFGAHQC  
LGQSLARITMEIALGALIDRLPGLRLAVPAEEVPFLPAASLQVIAELPIT  
W

>CYP166A4 (2516011205) *Salinispora arenicola* CNX891

MTDAISFELPWARTDKFDPPAVFDALREQRPLARMRYPDGHVGWIVSSYE  
LVREVLGDPRFSHSCAVGHFPVTHQGQVIPTHPQIPGMFIHMDPPEHTRY  
RRLLTGEFTVVRTSRLTGHVEGVATEQIEVMREHGAPADLVATFARPLVL  
RVLSGLVGLPYGERDRYLHAVTLLHDAEADPAEAAAAAYEQAGAYFDEVIE  
RRRRQPEDDLISTLVGGGELSGEELRNIVTLLLFAGYETTESALAVGMFA  
LLHHEDQLARLRADPTKIDAAIEELLRYLTVNQYHTYRTASEDIELHGEV  
INKGDSVTVSLPAANRDPARFACPAELDIDRETSGHVAFGFGIHCCLGQN  
LARVELRAGLSALLRAFPNRLRLAVPADEVPLRLQGSVFAVKNLPVCW

>CYP107AX4 (2515713557) *Salinispora pacifica* CNT855

MTSQPAPVFDQLLLRDPHRRYNALRDEAPVHHIRTPDGAPAWLVTRYDDV  
RAAFTDPRLSVDKRLSSTDGEHGSSLPPELDAHLLNRDPPDHTRLRLRLAA  
AAFTPRRVADLRPAVERIVSTLLDGLVGHDAQAELIGSLASPLPLQVMQEL  
LGLPTQTSVDFRRWTNTLLSADANQPAQSRSAMANMRRFLVEQLAHKRAR  
PGDDLLTGLLAAREDDRLTDDELVAMLFLLMFAGYDNTAALIGNVVHAL  
LTNTELPAAVRTGSLALDELVDGVLRWNPSFPLAVRRFAREPIITAGQTI  
PAGDRIWLCLASANRDPAQFTAPDTLGTGMRRPHLSFGHGIHYCLGAPL  
ARLQTTVAVTILLDRFPGIRLAVPAHDIRWRESFRLRGLVALPVFL

>CYP107AW7 (2515713571) *Salinispora pacifica* CNT855

VETVTGTSTPPPVPYIADPYPTLARIRANGPVSILHSDEGIPMWVIARYR  
DVRAALADPRFGQDARRAQALADNRVAGVTLGGDIVHMLNSDPPDHTRLR  
RHVQGAFTARRVAAMRPLVERITTSLLDGLTGRTTVDLVQDFAFPLPMLV  
ICELLGFPAEERNAYRSWSTAILTHDDDPAAAFATALREMTDYIAVQLRIR  
QTRPGDDILTELLAARDAGQLTDDEIIGMVFLLLIGGHETTVNLLGTATL  
ALMRNPDQHRWLLANQHALPEAIDEFLRYESPVAMATLRFTTTPVAVDDV  
VIPAGELVLVSLGGANRDPDRFPDADRLILDRDGTGHLAFGHGLHRCLGA  
FLGKLEGEVALGALLRRHPRLALAAEVRQLRWRDTIMLRGLESPLVSLHG

>CYP125A65 (2515714402) *Salinispora pacifica* CNT855

MTEPRIPVGFDFTDPAVLERRVPREEFAELRRTAPVWWNVQPRGSAGFDD  
DGYWVVTRYADVMASRDSETYSTRENTAIARFQPGTTQADREMQRVIMI  
NVDPPHEHTKLRAIVSRGFTPRAINALRGSLAERAERIVRDAAVRGTGDFV  
TDVACELPLQAI AELIGVPQHRRKVFWDWSNQLIGYDDPAYGVDPMAAAA  
ELLAYAMEMANERQNRNPSDDLVTQLVNAQIDGHELTDEFGFFVMLLAVA  
GNETTRNAITHGMLAFLEHPDQWELFKAERPRSAVEEIIRWATPVNVFQR  
TALVDTTLGGQGITAGQRVALFYGSANFDESVEEPERFDITRSPNPHLG  
FGGSGVHFCLGANLARLEIELIFNSIADHMPDIRKVADPQRLRSGWINGI  
REMPVRYR

>CYP211B11 (2515714987) *Salinispora pacifica* CNT855

MDASEAVALLTSPPGRLDPYPTYERLRAHGPPVSTAPGFFVVTGYTEADT  
VLRNPRFEVMEDEERDGVFPHWQDSPAMISISRSMIRANPPDHSMRRLA  
AGVFTPRRVAALREVVAQAADGLVDEMIRAGRGAADVFMGSFAYPLPVT  
VICALLGVPTADWARFRHWASDLTGVLPEIITPQELAIADAGASELRDYF  
TELIAQRRRAPADDLTALVQAHDADGDRLSGEELLANLVLLLVAGFETT  
TNLLGNGLVLLTHPDSATALRGQPELAPGYVEEFLRYDSPVQLTSRTVR  
ESVSLAGVELPAGSWLLVLLGAANRDPARFTDPAFDPARRAQSPPLSFGA  
GAHYCLGAGLARLEAQVAFPLLLRRLPELALAGEPTRRHRLTLRGYETLP  
VTVGAVPADPGTPAGVALGTP

>CYP105AB28 (2515715437) *Salinispora pacifica* CNT855

MTETASTTTTPGISSTTTSGPASGEVTDAQFPLERGCPFSTPTEYEQIREH  
SPLAKVRLTTGREAWWIAGHELGRAVLADRRFSSDRRRDNFPFVSTDPE  
RKQLQDQPTSMIGMDGAEHAQARRALMGFTVRRMAGLRPRIQQIVDQHI  
DEMLSSDQRTADLVEALSLPVPSLVICELLGVYPYADHDFQARSGLIRH  
TTPTEVRLRIQKELNTYLGALIDRKVADPTDDLRSQIAKHHAAGTFDRT  
SLVSMAFLLLIAGHETTANMISLGVVGLLQHPDQLAMIKEDPEKTAPAVE  
ELLRYFTTIADTVTARVATEDVQLGDTTINAGDGVVISGLAADHDPTVFTD  
PDRDLERGARHHVAFGFGPHQCIGQTLARMELQIVFDTLFRRIPTLRLA  
APLDDIPFKSDAFVYGAERLPVAW

>CYP107FH3 (2515715936) *Salinispora pacifica* CNT855

VPIELDEAFVQDPYAVYEKLRAEGPAHRVRMPPGVPLIGGLPVWLITGYD  
AVRAALADSRSLSTDHLRIDGLFAQKDPDRSHRGGFSSALASHMMHTDPPD  
HTRLRKLVSKAFTTRAIEALRPRIQQTTDELTAELAGHDTVDDLDAFAFP  
LPIRVICLLLGVPVAEQENFRSWSRALVSGHSPEAAATAATEVAAYLGDL  
VERKRHATTDDVLTALVAAHDVDDRLTHTELVSTAYLLFIAGFETTLNAL  
GNGTLHMLHRDQWTALRADRALLDNAVEEFLRLESPLKHATFRCATESL  
RIGDAEIAAGDFVLLAIASANRDPRRFPDPHTLDVRRPAAGHLAFGHGIH  
HCLGAPLARVEVRMAFDALLDAFPDMRLATDPAGLRWRNSTIIRGLDSL  
VHLNN

>CYP2054A3 (2515715941) *Salinispora pacifica* CNT855

MSISADSEQVQGRFPDPYGAHRDDPYTFLAGLGVFYAPLLDAWCVTQRED  
MVAVLRDDRSFSARDHNPRPAVALPDDVNQMFRTWRGAGAVAVGSLDPPA  
HAKIRDVLNIGFTPARVRAFEPTMRAVAADLADRIGDAPEFDFIADFAVP  
FALEVIGRRLGVPPDDYLDRCRTWSEQRIELMMAQGDADHDRLREFARGLM  
EFGEFARSLVRDRVADPRDDLISELLHDGKAGRTLTADEVAVQIPTLIFA  
GHMTCAEALGTIFYQQLRSPGGWARVVDRTIPVGDVVEEGLRFDSPLAGM  
YRTATRDVTVGGIRLTAGSRLLLLYGAAGRDSRAHACPAAFRPGDGSSGH  
LAFGHGIHFCLGAGFARAELRVAVEVLAARMPDLGLAPGRPPRFRPVFPL  
RALTEL RVTRSGGGSGP

>CYP161N4 (2515715946) *Salinispora pacifica* CNT855

VNTVAQLPFTQTHVLDVAPALRLLQSRGKVHRVRTPEGVPAWLVTGHAEV  
QQLLDDDLRSRSDPGGRDGGTALLNKLLGPLADDHPRLRSLLEPQFTPER  
LEPLRAVVEKLTEQHLDELAARTPPVDLRPALAMSLPILVLCEWLGVP  
AE DKGRFSVWTQDAAGVQDPERSQRGLAELFGYCRQLVAAKRQDPGDDVISR  
LIATAGIGDTEVVALTALLLFGGYETTVARIGTGVLNLLTNPDQWAAVRA  
DPALVPATVDELLRRSMPNPNHNGMPRFAVTGFEIDGAAIRAGDLVLLNI  
IAANHDETAFPDPDRDLITRPTAGSLAFGYGRHSCVGAPLARMVLRVALS  
RLITRFPELRLAVGVDELKLRHETLVGGGLVELPVTWGP

>CYP208A22 (2515716025) *Salinispora pacifica* CNT855

MTVIADRGGRIPPGPPVTAGLRLLLLALGRDRLGMMTSAAA EYGDVARLPV  
GPKKLYFFNHPDHAKHVLADNHANYQKGIGLVHARRALGDGLLTSEGELW  
RKQRRVIQPAFQNRRLAQYAGAVGQEATRLVARLATRVDPGPPVDVLDEMT  
RLTLGVLGRTLDDAELTGFGHVGESFAAVQDQAMFELETNTVPTWIPLR  
RQRRFRRARQHLQEVVDVLA AERGQAVEGRDDVLSRLILSTRAEADPQLG  
RERLRDELVTLLLAGHETTASTLGWSLHLLDQHPELRERVRHEARTVLGD  
RVPAYEDLHQLRYTAMVVEEAIRLYPPVWILTRKARAEDEIGGYRVPAGA



DILICPYTLHRHPRFWAEPERFDPERFDPSRTTDRPRYAYIPFGAGPRFC  
VGNNLGMLEATLVLAVLLRDLRLEGLPGRAVVPEPMLSLRVRGGLPMTVR  
RVD

>CYP1278B5 (2515716726) *Salinispora pacifica* CNT855

MPSPIGTVVHPNYPYPYAAAMVAERPLHFDEQLDTWVAASAAAVQAVLTAP  
GCWVRPPHEPVPQGITGTAGDVFGNLVRMTDGEPOHRLKAIVTQTLGAV  
DRTTVAATAAQRAQQILNDPVRTPYEQLMFELPAQVVAMLCGLDPAAGGE  
ASRLVGRFVQCIPAAASPEQQQRAARAAAGLQELLGPKLDDTQHGLLGDL  
VRMATQVNWTDRAPLLANGIGVLSQTYDATAALMGNTLLALSQQERERPA  
GETALERFVREVIRHDAPVQNTRRFTTTPIRHGAVEVPAGQAILVLLAAA  
NRDPAANPNPHTFRADRTAPTFTFSAGAHRRPGEMLAVTVVTTVVEQLL  
KVGFEPAASLSTQVTYRPSPNTRIPVLTDQAGT

>CYP107N4 (2515716908) *Salinispora pacifica* CNT855

MTTRDLRFGAFLSPLHPPGSDPTWLIANDLALVEHVDRLGFDEFWIGHH  
SGGWGIVSSPEVFLAAAAERTRHLRLGTGVVSLPYHNPFMVASRIVQLDH  
MTRGRVMLGVGAGSLPSDAHMI GVEPGQQRPRTAELDAVLHLLRSDEPL  
TMSTDWFDLRDARLQLRPYQHDLEVAISSAASPFMSRLAGRHGLSPLSFS  
AGLPGVGVANLPRQWAHAETATGAGRVVSRDDWRLVSVHVAPTTEQAY  
AEVRSGRHWLQGYFGDLIGLPVTPEGVEPGEELEAMVESGGAI VGS PRD  
CIEAIERLQGVTTGGFGTLLVTVDWAGPQQVRNSFELLASEVVP HFRGSL  
RRIEDSRRVWTQQRGVLVPKAVTALQAVLAPEPPTPETRPEAAPAPSGAP  
AYPFGPPEKLEPDPHWARLREHEPVSRVTL PFGGEAWLATRYKDVRTVFA  
DRRFSRAAAVAEGAPRFFSQQPPDAILSMDDPDHTRLRRLVGKAFGPKR  
MEQLRPRVQQITDELLAEMERRHPVVDLVEDFSIPLSVTVICELLGVPT  
DRDRFRVWSNAVLSTTAFTPEQAARYQAELHTYL GELVARHRAKPGDNLL  
GQLASNQDEDVLSESELLRLGESILIAGHETTASHIPNFVYTLLRHPEAL  
EKL RGE PALIPDAVQELLRFVPIGAVDGM PRVATEDLQLQGV LIRK GDAV  
LPSMG SANHDERAFADPDRLDITRGSNPHVAFGN GPHHCLGAPLAVVELE  
IALSSLLTRFTGLRLAVPEDELRWKNGLIVRGLEAMPVTW

>CYP107AY9 (2515717548) *Salinispora pacifica* CNT855

MSQDQPTRAELAPIPRSGARIGPEYDQLRKTGDVHQVLLPDTSMALVTS  
PDLVSRALADPRLALNRKHSRGWSGFALPPALDANLLNDAPDHTRLRR  
LVGPAFSPQRVAALRPRIQRTAEELAETMVATGSPVDLVTGYCTPLSVQV  
IADLLGVPDAGRTDLRAWTDMLTSYPPDRDAIRQAVVELHGYVVNLIEA  
KQQRPGDDL LSALVATEQEGDRLTRDELTS LAFLILFAGYENTANLIAS T  
VLRLLDHGSLRGVRVSEAIEETLRLEPPAPAAIRRFPT EMTIGGATIPA  
GDTVLLSIAAATRGADGNPARLAFGN GPHYCLGAALARVEAEEAITVLAR  
RLPGLALAVPGAPVRWRPTFRTHGPAELLVAV

>CYP1005A6 (2515717700) *Salinispora pacifica* CNT855

VSAVLFRSWTKTAGTHWPAVTRVADQQGTEHLVVTEHALVRQVLT DQVTY  
RPDNALDAVTPI PVAALRVLAGHRFRLPPTLANNGGVSHPAIRALVADAL  
HPAKVAAQR PWLT ELVAERVA AIRATLDSGGSADLHAELSADLPLLVLAR  
LVELPDAPVSAVKQFARAAL ELFWAPLDADRQLALADEVGRFHQV LREFA  
DTGGGLAAALRATGHPPDVLVGALFFLLVAGQETTSQFL TLLLHRLAGEP  
AVRAALRDGSVSVPNVVEEGLRLEPPIV TWRRVA AVDSTLGGTAVPAGTS  
VLLWLARAGRDPAIVSAPDEF RFGQQGSRRHLAFGAGAHRC LGDQLARME  
AAVVVERVSPLLDGVTVVRAPWYPDNL TFRMPDAFVIRRG PAGAAER

>CYP107E37 (2515718055) *Salinispora pacifica* CNT855

VTIDQEIREYPPFRESRGIGIDPTYELLRRTEPLARVQLPYGEVSWLVTRY  
EDVKTVLTDPRFSRAAAQGKDQPRTRAEMTYEGIIIGLDPPDHTRLRRLAG  
KALTARRVNAIRADAQRIANEYVDEMIAKGSPGDLVELFALPYPVTVICE  
LLGVPFEDRAQFRIWTEGLTSTSEQLMVYAEQLFDYMGKLVAQRRAEPTD  
DLLGALVKARDEGDRLTEQELLSIAGVGLLLTGIVETVSTHIPPVYALLT  
HPELMAQLRADRSLVPAAVEELLRMIPLNPAAMFPRYAVEDVTLSGITVR  
AGQPVLVSLPGANRDPEVFENPETFDFTREQNPHVAFGHGPHHCLGAQLA  
RMELQVALHTVLDLRFDPDLRLADGDEGVSWKSGLLVRGPSRLLVGW

>CYP211B19 (2517958869) *Salinispora pacifica* CNS996

MDASEAVALLTSPPGRRDPYPTYERLRAHGPPVATAAGFVVTGYTEADTV  
LRSRPFVMDDEERDGVFPHWQDSPAMMSISQSMIRANPPDHSRMRRLAA  
GVFTPRRVAALREVVAQADELIDELIRAGRGAPVDFLGSFAYPLPVTV  
ICALLGVPAADWAQFRRWASELTAVLEPEITPQELAVADAGATELRDYFT  
ELIAQRRRDPADDLTALVQAHAAGDRLSGEELLANLVLLLIVAGFETTT  
NLLGNGLFVLLTHPDSATALRGQPELAPSYVEELLRYDSPVQLTSRTVRE  
SVTLGGVELPAGSWLLVLLGAANRDPARFTDPARFDPGRAQSPPLSFGAG  
AHYCLGAGLARLEAQVAFPLLLRRLPELSLAGEPVRRSRLTLRGYETLPV  
TVGAVAADHGTPAGAALGTP

>CYP105AB29 (2517959662) *Salinispora pacifica* CNS996

MTETASITTPGTSSTTTSGPASGQVTDAEFFPVERGCPFSTPVEYEQIRDH  
SPLAKVRLTTGREAWWIAGHELGRAVLADRRFSSDRRRDNFPFVSTDPE  
RKQLQDQPTSMIGMDGAEHAQARRALMGFTVRRMAGLRPRIQQIVDQHI  
DEMLSSEQRSADLVEALSPLVPSLVICELLGVADHDFQAHSGPLIRH  
TTPSEVRLRIQEELNTYLALIDRKVTDPTDDLLSRQIAKQHAAGTFNRT  
SLVSM AFLLLIAGHETTANMISLGVVGLLQHPDQLAMIKEDPEKTPPAVE  
ELLRYFTIADTVTARVATEDVQLGDTTINAGDGVVISGLAADHDPTVFTD  
PDRIDLERGARRHVAFGFGPHQCIGQTLARLELQIVFDTLFRRIPTLRLA  
APLDDIPFKSDAFVYGAEKLPVAV

>CYP244A5 (2517960241) *Salinispora pacifica* CNS996

MSATTNAELGEAPETSMPIDPGLFDCMPDLIAAARIAPVVRIPYLGRHAW  
VVCDELVKQALTHPKMGKDIALVPEWMRQFGLMVTAQPPPEYARAMIMS  
DGENHARIRRIHAPVLSRPNTERWGEQVADKVEGFLDELSKAAAGSNAEV  
DVVTNYTHKIPLAFISEMLGLPPAAEHRLRSITDIMLYSSDYAARREAIG  
GLFGAVEEWVRNPDGLRDGVITGLLAGSDGPGAAVTEGEVIVWTLGMIIT  
GYETTGLSLISTSLYEALRRPPHERPRTDEDITAWIEETLRVHPPFPHTW  
RFPLEDIELGGYLIPKGAPVQVSIAAANRQPGEGADSFDAERRGHGHLSE  
GLGMHYCIGAPLVRLEAKIAVRGFLRRFPQARLSADTAVQWESEWMIRRM  
SSLPAVLS

>CYP245A11 (2517960245) *Salinispora pacifica* CNS996

MSSTTLPRFTLTGWNREDIVNPYPVYRRYREVAAVHRGEAGGDAPETFYV  
FSYDQVAQVLSSSCFGRGRSLDATAASVPVPADQKALRAVVENWLVFMDP  
PRHTELRSLLNRSFSPRIVTGLRPRIARIAQELLSRLGGQVETDLVEGFA  
APLPILVIAELLGIPAGRHWLRTNALALQEASSSRARRDTAGYARAEAA  
AQEFTEYFREQVRLRRGSTGDDLLTILANAQLRGVPVSLDAVVGTAVHLL  
TAGHETTTNSLAKAVLALQAHPAVLEELRGADGLTADSIEEFRLRYDPPVQ  
AVTRWTHQDCTLGGWEVPRGSRVALLGSANRDPARFPLPDALDVHRPAD  
RHLGFGGLGIHYCLGATLARAELEIGLQTLNGLPTLGYPAQYVDYADDMV  
FHGPSRLILVNPGERFCQ

>CYP211C6 (2517960273) *Salinispora pacifica* CNS996

VPDIEGLLTRLYSAQGRQDPYPVYADLHAQAAIAALEPRPERQRVAHAV  
GYDLVAAVLRDPDFWKQPPPDWRDQEILRILQSSMMFINPPDHGRMRHVF  
AGTFTPRRLGALEPVINRVTDDELLDRMADAGPGGVDFVAEFAYPLPARVM  
AEFIGIPATELAWYRERVDRVDAFLDVAGKTPERLAAANAAGAE LRSFYR  
ELLAHRRRTPGEDLISGLVEAVDAGGVELTEDELISNLIVLFNASFVTTV  
YLLSNGLPVLLAHPEVAAALASSPELAAGAVDEILRLQTPVHLLARAAPR  
DMVLGGVSI PQGQSVLLLLIAAANRDPAHFPAPDRFDP RRSPPSLAFGLG  
LHYCLGAAVSRLEGRLLPRLLSRFPRLRILEQPVYSGSLFLRGIDKLSV  
SPGGREHP

>CYP125A66 (2517960404) *Salinispora pacifica* CNS996

MTEPRIPVGFDFTDPAVLERRVPREEFAELRR TAPVWWNAQPKGSAGFDD  
DGYWVVTRYADVMASRDSETYSTRENTAIARFQPGTTQADREMQRVIMI  
NVDPP EHTKLRAIVSRGFTPRAINALRGS LGERAERIVRDAAGRGTGDFV  
TDVACELPLQAI AELIGVPQHHRKVF DWSNQLIGYDDPAYGV DPLAASA  
ELLYAMEMAHERQRNPSDDLVTQLVNAQIDGEHLTADEFGFFVMLLAVA  
GNETTRNAITHGMLAFLENPEQWELFKAERPRSAVEEII RWATPVNVFQR  
TALVDTTLAGQAI SAGQRVALFYGSANFDES VFEEPERFDITRSPNPHLG  
FGSGGVHFC LGANLARLEIELIFNSIADHMPDIRKVADPQRLRSGWINGI  
REL PVRYH

>CYP107CL2 (2517960446) *Salinispora pacifica* CNS996

LQITPEFMHDPYPVYVGM RDSAPIHLS DANAGRTWFVPRYHDVIDVLRDD  
RFS AALKAPAFINQFPPEQRAQFQPFNQSIAGWVVLQDPPAHRQLRQLMN  
KGFT RHLVAALRPKVTEIATGLVD TMATRRSGDFMTDFAQFPFAAVIATM  
FGVPAADLSAFISWSDDIVL FAGSLRPTVEVARAAQNGLLSMTEFFRQLL  
PQRRADPGDDVISLLVSVRDNGEQLTDEQVLANCAQLIVAGHETTRNLVA  
NGLWTTLLSHPDQLAKLRADPSLMTSAIREMMRFESPLQFVRRVARDDFDY  
LGVRIQAQDGVV TMLGSANRDPAFFTEPDRFDITRNPTGHVALGYGPHIC  
LGAALAEMETEVALG LLLERFPDLRAVDEQPERVMNPMLRGFAELRLSW

>CYP1056B2 (2517960455) *Salinispora pacifica* CNS996

LRHVDFLSPELGDELWRVFARYRREQPVVWVSSVRMFCVFRHADIR TALT  
SPDFTVDY PFRVSRQVFGPTLLDFDGRHTILRRRLGGLLVGRDDNVAFT  
GPIERSVADVLDGLDG VAGFDFVPTVARRLPEAVTAAFLGIPQADREWVY  
AHLRYLLDHLDGSSRDFAVATELRREVSALVGRLLADPGQAEHTVLGR LG  
NARRAGELDPEDAVGMALLVLAAGVETSTGMLANTMATLARFPRWATAGR  
DDDVLGRVVREVLRWQPPQMDTVRFARRDTTLAGVPI PAGRPLKLLLAS  
GNRDEDVFTEAE EFRPDREERASLSFGHGAHSCLGTHLAVAVATRFFAAF  
LRRHPGATVPGPV PPIGGWTFRQPVTLPVRLGGPDPVGATATEGGQR

>CYP107AW6 (2517960795) *Salinispora pacifica* CNS996

VETVTGTSAPPPVPYIADPYPTLARIRANGPV SILHSDEGVPMWVIARYR  
EVRAALADPRFGQDARRAQALADNRVAGVTLG GDIVHMLNSDPPDHTRLR  
RHHVQGAFTARRVAAMRPLVERITTSLLDGLAGRKTVDLVQDLAFPLPMLV  
ICELLGFPAEERNAYRSWSTAILTHDDDPAVFATALREMTDYIAVQLRLR  
RSRPGDDLLTELLAARDAGQLTDDEIVGMVFLLLIGGHETTVNLLGTATL  
ALLRNPDQHRWLLANGHALPEAIDEFLRYESPVAMATLRFTTTPTVTDDV  
VIPAGELVLVSLGGANRDPDRFPDADRLILD RRD TGHLAFGHGLHRC LGA

FLGKLEGEVALGALLRRHPKLALATEVRQLQWRDTIMLRGLESIPVSLHG

>CYP107AX9 (2517960807) *Salinispora pacifica* CNS996

VTAQPAPVFDQRLLRDPHRRYNALRDQAPVHRV RTPDGAPAWLVTRYDDV  
RAAFIDPRLSVDKRFSGTDGEHGSSLPPELDAHLLNRDPPDHTRLRLRLAA  
AAFTPRRVADLRPAVEKTVSTLLDGLAGNDHAELIGSLASPLPLQVMHEL  
LGLPTQTSVDFRTWTNTLLSADANQPAQSRSAMANMRRFLIEQVAHKRAQ  
PGDILLTGLLCVREDDDGTLTDELVAMLFLLMFAGYDNTAALIGNVIHAL  
LTNVELAEAVRTGSLAVDELVDGVLRWNP SFPLAVRRFAREPIT IAGRTI  
PAGDRIWLCLASANRDP AHFTEPDEIGIADMRRPHLSFGHGIHYCLGAPL  
ARLQTTVAVASLFD RFPGVRLAVPVQDIQWRESFRLRGLVALPVSL

>CYP208A21 (2517960820) *Salinispora pacifica* CNS996

MTTTSIDRRRPPGPPRAAALSMLLTMSRDRLGMMTAAARAYGDAAWLPVG  
HKALYFFNHPDYAKHVLTDNSDNYTKGIGLVHARRALGDGLLTSEGELWR  
EQRRVIRPSFRSGRAPDQASVIAEEVASLVERLRARAGPPVNVVTEFTG  
LTLGVLGRITLLDVDLTALATVGDAFAAVQDQAMFELVTL SAVPTWIPLTR  
QRRFRRARAELEIRIVDDLVAGRGDVSGRDDVLSRLILSTGAEPDARVRRQ  
RLRDELVTLLLAGHETTASTLGWTLYLIDRHPPVRELRRAEAVEVLGDRL  
PVYRDLPLDRFTTMVVQEAMRLYPPVWLLPRRSRRADRVGPYRVPAGSDV  
VVSPYTMHRHPGFWEFDPDRFDPLRFDPRNAADRPRYAYLPFGAGPRVCVG  
SNLGMMEAVIAVAMLCRELRLVRVP THAAVPEPMLSRLIRGGLPMSVHLA  
D

>CYP154M16 (2517960832) *Salinispora pacifica* CNS996

MPDRCPVLDP SGRIHAEADRLRAQAPAVKVELPGGVHAW SITSYDVVKR  
LLLDRNVTKNARNHWPKFINDEIPPDWEMISWVAMDNMVTAYGKHLVRLR  
RLIAKAFTAQRVETVRPQVEKLVDEL LDGLAAETGEVVDLREKFCYPLPA  
LLIAELIGMTEQQRAQTAKAMDLMVDTTVSPDQAQAILTGWRTAMDELIA  
AKRREP GKDIASDLIAARDDENGGLT DSELTD TIFAILGAGSETTINFL  
DNAVTALVTHPGQLELVRSGRAGWDDVIDEVL RVQCPLASLPLRYAVTDI  
ELDGVTIPQGDPI LINYAAAGRDPALHGD TAGEFDVFRENKEHVSFGHGP  
HYCLGAGIARLVATIGLSRLFERFPDLRLAVPVEELQPLPTFIMNGHRAL  
PVRLVPAPAAATAV

>CYP163B20 (2517960938) *Salinispora pacifica* CNS996

VTATEAKYVGQVGNRNVASTIDLADPATFAGHDLTNFWQRLRDEEPIYWN  
PPTGGRRGFVWLSRHADILEVYRDDMTFTSERGNVLVTLLAGGDAGAGRM  
LAVTDGPRHAELRKLLLRALGPRVLGPVCRAVRANTRQMIGEAAAANGECD  
FATDIASRIPMITISNLLGVPEADRASLLKMTKTALSADDESISD TDSEM  
ARNEILLYFQDFVEFRKNPGE DVVSMLVNSSIDGVPLSDDDIVLNCYSL  
IIGGDETSRLTMIDSINTLAANPGQWRRLKEGRCDIDKAVDEVLRWASPS  
MHFGRTAVRETVIHGERIQVDDIVTLWGASGNRDERAFKRPEVFDLDRAP  
NRHLSFGHGHPHYCIGSYLAKVEISELLIALRDLILGFEVIGVPQIRIRSNL  
LSGFSTMPVRFDADRTGLASEAREG

>CYP105BL1 (2517960971) *Salinispora pacifica* CNS996

MSAHPAATPGSGPAPSLNELTPELTYPQFDRPNPFDPPE TYTELSSRCPV  
APVRMPSGQSSWLITSFEGARKVLS DPRFSADMSRPGFPNLNDKPVDVVL  
KDTLRHVDGEEHMHYRRTLTGEFSVKRMEALRPVITQFTDDALDQLAAAG  
SGADLIK HVARVVP SRVVCHLIGVPFSDFEFFNEMVSTLMDTSSSADQIR  
SAKQGLDSYFDQLITDREHHDQDDLGRMVRRYLATGELTREEVAELAWI  
TLAGGQETT PHMIGLVATLLRHPDQLKLLQQEPALLPGAMDELLRYLTV

VHLGMPRVAVADVEIDGQTVAAAGEGVVALLPLANRDPSVFERPNELDIRR  
NARQHLTFSYGP HQCPGH TLARLELEVVFGR LMERFPNLRLADENTELKT  
RDKAIVYGLTELAVAW

>CYP1005A8 (2517961658) *Salinispora pacifica* CNS996

VSAVLFRSWTKTVGTHWPAVTRVADQQGTEHLVVTEHELVRQVLTDQVTY  
RPDNALDAVTPIPVPALRVLAGHRFRLPPTLANNGGVSHPAIRALVADAL  
HPAKVAAQRPWLTKLVAERVAAIGATLDSGGAADLHAELSADLPLLVLAR  
LVLELPDAPVSAVKQFARAALALFWAPLDADRQLALADEVGRFHVQLREFA  
DTGGGLAAALRATGHPPDVLVGALFFLLVAGQETTSQFLTLLHLRLAGEP  
AVRAALRDGDVSVANVVEEGLRLEPPIVTWRRVAAVDSTLGGTAVPAGTS  
VLLWLARAGRDPAIVPAPDEFPRPGQRGSRRHLAFGAGAHRC LGDQLARME  
AAVVVEQAAPLLDGISVVRAPWYPDNLTFRMPDAFVIRR

>CYP162A8 (2517961674) *Salinispora pacifica* CNS996

MISPDLSDP TFYQNGDPLPVWAE LRREHPVYDNRRADGTRI WAVMTHKLC  
TDMLTNPKVFSSANGMRLDSNPRVLARAAGKMLNVTDPQHDKIRKLVSS  
AFTPRTIRRLEANMRATAGRAIDTAIADGGCELTRLAHKLPVSVICDLLG  
VPEQDWDFMAERTRFAWGSTAADDREEVEKVAAHTEIMAYFLDLAADRRK  
RPMEDLV SALVHGEVDGRALTD EDVLYNCDALLSGGNETTRHATVGGFLA  
FVMNPDEWSAIRQNRDLLPSAIQEIVRYTSPVMHSLRTATRDVEFGGINI  
RAGEYVVAWLP SANRDEQLFDDPDRFNIRRS PNRHLGFIQGNHYCIGAGL  
ATMELGVMFDELLNRVSEVRLAGPARRLR SNLLWGFD SLPVTFHVGAGR

>CYP1278A3 (2517962062) *Salinispora pacifica* CNS996

MPSPVGAVVHPNPYPYAAAMVAERPFFHFDEQLD TWVAASAAAVQAVLTAP  
GCRVRPPHEPVPQGITGTGPAGDVFGNLVRMADGEPQHRLKAIVTQTLGAV  
DRSDVAATAMQRRARQVLNDSVRTPYEQLMFELPAQVVATLCGLDPAAGGE  
ATRLVGHFVQCIPATASPEQQQRAAQAAVGLQELLGPKLDDTQHGLLGDL  
VRLATHVWGADRAPLLANGIGFLSQTYDATAALMGNTLLALSQQECELPT  
SEMALQRFVREVIRHDAPIQNTRRFTATPIRHGDVEVPAGQAVLVLLAAA  
NRDPAANPDPHMFRA DRTPNVFTFSAGAHHC PGETLAVTIVTTVVEQLL  
TVGFHPAKLSTRVTYRSPNARIPVLTE

>CYP107AY7 (2517962194) *Salinispora pacifica* CNS996

MRAEPAPIPRSGARLGQEYDQLRKTDGVHQVLLPDTSLAWLVTSPELVSR  
ALADPRLALNRKHSRGGWSGFALPPALDANLLNL DAPDHTRLRRLVGPAF  
SPQ RVAALRPRIERTAEELVDTVVATGSPVDLVTGYCTPLSVQVIADLLG  
VPEAGR TD LRAWTD TMLTSYPPDRDAIRQAVVELHG YV VNLIEAKQQRPG  
DDL LSALVATEQEGDRLTRDELTS LAFLILFAGYENTANLI ASTVLRLLD  
HGSLRGVRASEAIEETLRLEPPAPAAIRRFPIEETTIGGATIPAGDTVLL  
SIAAATRGTDGNSARLAFGN GPHFCLGAALARVEAEEAITVLARRLP SLA  
LAVPGAPVRWRPTFRTHGPAELLVTW

>CYP2091A1 (2517962610) *Salinispora pacifica* CNS996

VRAGPATTTAPGIPVHLERGAHWLHRVRDDDPY AALLTG FDEDPVPAYER  
IRARGPLWRSSVGDWVTADHEVATLVERDPRFAPAGLAADV RGWAGLNPA  
ALDRHRNAVRRRC DQLTDALPARFDLVTDYAE RVAAEAVADLLGRSTVPV  
GRLAEVLHAVRTGPDGD LAPQRLRDQRAFDDGLAE LRRLAPEHPTGPAPT  
AGPDPLL LATFGARITVN LIVGVLLAATRQ PATT AHSGIAALLAETVRHD  
PPLTMYPVCLRADVETTGQRLRTGDRLVVVVAGANRDP RVFHEPDRFMPH

RALAGPDRRI RTPGPAYRALADCCHAQAVMAVEALRRRHPR LWPGPVLR  
RGRAPVTRGPARCPIVTEHREVEDR

>CYP107CT3 (2517962824) *Salinispora pacifica* CNS996

MIGASGDR TGQCPIALDHD FYADPH PAYRVIKENG NKPTPIVLKTGMAYL  
PPGLEAWLV TAYEDVEFVLRDPRFRK SIDEAMPLFAAQSGGTVAARGSL  
YNNMANNDP PVHTRLRKPLNAMFTARSVAGRRDVVRSAALETLEKVAGSQ  
TFDLVQDFAFPFSISVISRTLGVPDADRGT FHGWVQTITGDAPPEILRRD  
AGLMVEYLRGLIRGRRESAGNGTDDVLTLLATSLAEDEAVAQAYALLAAG  
YETTANLIVTGFLT LAAHPEQLRRLWSDPGLVPDAVEEMLRHQSPFNLSL  
YRYVTEPVELNGVRI PRGAIVFLAFAAANRDECRFTEPDSFDITQPHRDH  
LAFGGGIHNCIGKHLARMEAQVAFETLIERCPGLAVHTPDEEFDWKASPT  
FRGLRTL RVGPGPAPGGWEREQ

>CYP113R3 (2517963774) *Salinispora pacifica* CNS996

MTSSAGQKDPSEELFSWLRTMLETRPVYRDEENGWQVFGYADISRTLADT  
TTFSSDTARAFNPPQPDLDFFDMGNLVTTDPPRHRKLRSVISSMFTPRAV  
AGLSARIERITHSLDSDV DGEERFELVETLTYALPITVICELIGLPMQDE  
PLFRVWGDALGTIDAATVPPEQLENEVAPAI REMNEYLLAHARKRRRQPA  
DDVISRLANAKIDDRPLEDGEIVGVIGLTMFAGHATTMALTGNAVLLFDS  
HPEVDAAVRADRDLLPGAIEEILRLKPPFPRLARITTTDTEIGSHAVPAG  
ELVTPWIAAANRDATRFDPETFDIHRNTGGHLVFGQGS HFCLGAPLARL  
EGRIALNALLDRYAKISIDHDCGLEFENPWQLISPRRLPVAVKPL

>CYP105BL2 (2515745073) *Salinispora arenicola* CNT850

MSSHSAAAPDPETATPLHTLAPELAFFQFERSAPFDPPQAYTELSGRCPV  
APVSMADGKPSWLITSFEGVRTTLSDPRFSSDM SHPGFPNRTGKPVDDL  
KDTLGAMDGERHRYRRLMTGELTVRRAKAMRPVITQITDEALDQLAAAG  
PGADLVKHVAFVVP SRVACHLVGIPLSDYELFTGMAATLMDSTSSDDQFA  
ALQNMVSYFDTLVTDREHHDRDDLGHMVRRYLATGELTRDMLIRLAWTT  
MAAGQETTAHMI GLGVAALLRHPDQLELLRREPHLLPGAVDELMRYLPLI  
QFGIPRVAMDDVEVDGQTVTAGEGVVALPPLANRDP AVFERPDEL DVRRN  
ARQHLTFGYGPHQCPAHALARLELEVYGRLLERFPTLRLADSDADLKVQ  
DKDIMYRVSELAVTW

>CYP208A12 (2515745906) *Salinispora arenicola* CNT850

MTLDTITPRVPLGPPTAALRMLLV MKRDRLGMLTSAAARYGDASRLPVG  
HKALWFFNHPRYAKHVLADNSANYHKGIGLVHARRALGDGLLTSEGLWR  
KQRKVIQPAFQSRRIAQQAGMIAEEAFALVERLRARAGAGPV ELTAELTG  
LTLGVLGRSLLDADLAGFDSIGDSFATVQDQAMFELET LNAVPMWIPLPR  
QIRFRARRRKLQAVVDTLVDGRAGNLADRVDVLSRLILSARGEADPRVGR  
ERLRDELVTLLLAGHETTASTLGWTL SLIDRHPGVWERLHAEAVEVLGDR  
LPEYDDLRLRLRYTVMVVEEAMRLFPPVWLLPRRALAPDTIGEYRV PANAD  
VVISPYTLHRHPEFWPNPERFDPERFAPGQAADRPRYAYLPFGAGPRFCV  
GNNLGMMEAVFVIALLCRHLRLTGVP GHRLVPEPMLSLRIRGGLPLVVRP  
VS

>CYP1005A1 (2515746317) *Salinispora arenicola* CNT850

VSAVLFRSWTKTAGTRWPDVTRVADQSGTEHLVVTRHALVRQVLT DQATY  
RPDNAL EAVTPI PVAALRVLAGHRFRLPPTLANNGGVSHPAIRALVADAL  
HPTKVAAQR PWLTGLVADRVASIRTTLD SGGPVDLYADLTADLPLLVLAR

LVELPDAPVNAVKQFARAALFELFWAPLDADRQLALADEVGRFHQVIREFA  
DTGGGLAAALRATGHSPDVLVGALFFLLVAGQETTSQFLTLHRLSGEP  
TIRAALRAGSISVADVVEEGLRLEPPIVWRRVAAVDSTLGGTTVAAGTS  
VLLWLARAGRDPVVAAPDEFRPGQRGSRRLAFGAGAHRCCLGDQLARME  
AAVVVEQATPLLDGVTIVRPPWYPDNLTFRMPDAFVVR

>CYP166A4 (2515746438) *Salinispora arenicola* CNT850

MTDAISFELPWARTDKFDPPAVFDALREQRPLARMRYPDGHVGWIVSSYE  
LVREVLGDPRFSHSCAVGHFPVTHQGQVIPTHPQIPGMFIHMDPPEHTRY  
RRLLTGEFTVRRSRLTGHERVATEQIEVMREHGAPADLVATFARPLVL  
RVLSGLVGLPYGERDRYLHAVTLLHDAEADPAEAAAAAYEQAGAYFDEVIE  
RRRRQPEDDLISTLVGDGELTGEELRNIVTLLLFAGYETTESALAVGMFA  
LLYHEDQLARLRADPTKIDAAIEELLRYLTVNQYHTYRTASEDIELHGEV  
INKGDSVTVSLPAANRDPARFACPAELDIERETS GHVAFGFGIHCCLGQN  
LARVELRAGLSALLRAFPNRLRLAVPADEVPLRLQGSVFVKNLPVCW

>CYP107AX13 (2515746595) *Salinispora arenicola* CNT850

VTSPPHVAFGHLLRDPHGQYNALRGQAPVHHIRTPDGAPAWLVMRYDDV  
RAALTDPRLSVDKRFSDTDGEHGSSLPPELDAHLLNRDPPDHTRLRLRLAA  
AAFTPRRVADQAPAVATIVDALLDGIAGQDQAEILVGLASPLPLQVMHEL  
LGLPTQTSVDFRNWTNTLLSADANQPAQSRSAMATMRQFLMGQLARKRAQ  
PGDDLLTGLLAARDDDDRFTDDELLAMVFLMFAGYDNTAALIGNVTHAL  
LTDAGLHDAVRAGSVDLDSVVDEVLRWNPSFPLAVRRFAREFVPTIAGHTI  
PAGDRVWLCLASANRDPAQFTEPDELGITPARRPHLAFGHGHIHYCLGAPL  
ARLQTTVAVASLLDRYPGIRLAVPAHELRLWRESFRVRGLAALPVRL

>CYP105CP2 (2515746729) *Salinispora arenicola* CNT850

MTKSMPVQDLPAFFIPRECPYRPSAQHVSLRSGGPMKVRLYNGRTAWLV  
TDSA HARAVLSDYRRVSIKPYHGNYPLNEEFEKVVD SGYADVLFVGDPP  
EHTRQRQMIMPSFTLRRTAVLRPDIQRIVDDKLDEM MRHGAPGDLVTEFA  
QPVP SMVISFLLGVPWEDHEEFETPAHKLFVPELAEAEATTEL GAYLERLI  
QKKEQPGGTGGTGLLDDLRDHLRAGALS RDELVHIAMAMLVAGTDTTT  
NVISLGLTALLDNPQWAAALRDNPDDELIPGAVEEILRYTSLIEAFARVAV  
SDIELNGAVIKEGEGILISSAGVNFDPALAPDPGRFDIRRPPRPSFSFSH  
GIHRCPGDNLARLELEIAFRSLVTRMPNLR TAKPIDQIPSNNDGTLQRL  
YELPVVW

>CYP105CN1 (2515746731) *Salinispora arenicola* CNT850

MAAPAPQATPSTTPHPPSYPLPRECPYRPSAGTAHLRDAGPVSTVRLYDG  
RTAWLV TGAAEARALLADSRVSNRADFPNYPVM DERHLSMRATREMAREE  
EGGFAAALFGMDPPEHTRQRQLLPRFTVRQVAARRPAIQRIVDEHLDAM  
EANGSPADLVSAFATPVPTMVVCTHLGVYPYQDRTRFEPAVAGLFEPDRAD  
AAMAELTAYLHQLIETKQSEPGDGVIDHLIANHLRPGAIDRAELVAIASA  
ILVAGTVTTSSAIALGTLALLTAPGQYTALVDNPDLPV GAVNEILRYLSL  
VEQLARVATEDIEIGGKLIRAGDGIIVSFAAGNLDPNVTTHPDRLDVALP  
PTNH LAFSHGIIHCIGQNLALLELDIAFRALVSRFPTLRLAVPAEQLPY  
FAGDVPRLACLPTW

>CYP107FS2 (2515746732) *Salinispora arenicola* CNT850

MPVPQGEQNLTTTEVFADPKALFATLGSRQPLHRISLPDGM PAVLVTGNRE

ARQALSDPRLVRSITAAAPELHKYHPLASDDYALSRHMLFADPPDHGRMR  
KLVSTAFTRRRVEQMRPRIQQITDDLIDVIAAKGEADLVETLALPLPIAV  
ISEMLGVFPFADRSEFERHAEVLTGINASSGFDALIAAGRWFDEYLAGLVQ  
QRRREPQDDLISGMLAAQDKGDRLTDVELRSNALLLLSAGFETTVNLIAN  
GLLALLRHPEAMAAALRSEPNLMTTAVDELRLRYDSPVSCVTYHFAQEPVEI  
GGFEIRSGEHVVIAAAAANHDPTVFAAPSRLDLRREGSGQILSFSGIHF  
CLGAPLARLEGEIAFGTVLRLRRLAGLRLAVPTDSLWVKASFVLHRLRLPV  
TFTPDRDPNFIDSVHTV

>CYP125G6 (251574677) *Salinispora arenicola* CNT850

VPTLLNEHVSYDGAIAIVDSGATSWIRLAERVNRVHLLRAHGLDGTGD  
RLACVTGNRRETFEVLLAALHTGVTVPVNVHLLTVTEIGHILSDSGSRVV  
ITEELHVKAFAAAADGTAGPVAGLVLGDRVEGFAAVEPLLAASPAEPE  
GQVCGATMLYTSGTTGRPKGVVNNLFVTGAPYARVGRLCDYARSVLGVP  
RERMLLDGFPWYHSSQLFFALLSLLQGSRLVIRPYFDPAATLKTIDDHRIT  
VTHLVPTQLVRLLRVDALTRQMFSGASLRRVWHGGGCPPEVKRSMIDWW  
GPVLVEYYGATEGGVVTLIDSAEWLARPGSVGRAVPPSEVVVVDDGGQSV  
AAGQTGQVFFRRRTGNRFHYHNAPEKTQAAYLAPDTFTYGEVGHVDEG  
LFLTGRAQDMIVSGGVNVYPAEVEAALLRHPVVRDAAVIGVADDEFGERV  
VGIVVPETAVDPDDLATHLDAHCRVSLAGFKVPRTYRVESLPRDETGKL  
RKDALRSKFGWLSGAAMTVPRPATGQPTAHRPDIAHPTTYVSGVPHDEFA  
RRRRDEPVGWVAEPVLTRHTAAGRTATRGSGFWAVTRYEDVVAASRRVTD  
FSSAAKGAFLLTDPRTPADLQQAQQLLVNMDDPHHARLRKLVTSTVFTPRV  
RGLLASIDAHAAALVAKVVAAGEFDVVTDLAAELPLLVLADLLGVPKQDR  
ALLYGWSNHLVGFDPDFGGGDIDAYRTAMAEAFQYALNLGVERRARPTD  
DLVSLLANAEVDGTRLTDREFCNFWLLLVVAGNETTRHLVAGTMQALTEH  
PGECARLVEGRVPMESAVEELLRWVTPIMQFRRTATRDTEIGGQAVTAGE  
KVVLYYTSANRDATVFAEPEERLDLGRTPNRQLSFGIGPHYCLGAHLARAE  
LTALLRVMSPHLGSLQLTGVPVSRLASNFVNGVKAMPAVIGSR

>CYP154M15 (2515746796) *Salinispora arenicola* CNT850

MNDKCPFAALDVTGQDLHGEEARLREQGPAVLVELPGGVKAWSINRYEVI  
RELLMDRRVTKNARKHWPFIKGEIPPDWEMISWVAMDNMVTAYGKDHVR  
LRKLVGRAFTQRRADALRPQVVALSTKLLDDLGGATPPGEVVDLRERFAYP  
LPAMLVASLIGMSEAALAACSKVIDMMVHTNVSPEEAQAVLQGWRAAMAD  
LIESKRRTPGEDITTDLIAAREEDGSRLSEAELADTIFAILGAGSETTIN  
FFDNAITALLSRPGQLQLLRTGAVTWDDVIDEVLRVESPLAHLPLRYAVE  
DIELDGVTIPQGDPILVNYYAAGRDPALHGGTADEFDLARGDKTHLSFGY  
GPHYCLGAGIARMVATIGLSMLFERFPDLSLAVPATELKRLLPTFIMNGHQ  
TLPVRLTVHAR

>CYP125A41 (2515747243) *Salinispora arenicola* CNT850

MTEPRIPAGFDFTDPEVLAHRVPREEFAELRRTAPVWVNAQPRGSAGFDD  
DGYWVVTRYADVMTVSRSDTYSTRENTAIARLRPDTTREDIEMQRVIML  
NVDPPPEHTKLRAIVSRGFTPRAINALRGSLAERAHIVRDAAVRGVGDV  
TDVACELPLQAIAGELIGVPQHRRKVFWDWSNQLIGYDDPAYGTDPLTASA  
ELLAYAMEMAEERQSPSDDLVTKLVAQIDGHLTTDEFGGFFVMLLAVA  
GNETTRNAITHGMVAFLDNPEQWELFKAERPKSAVEEIIRWATPVNVFQR  
TALVDTVLLGGQAIASAGQVALFYGSANFDEAVFEDPERFDITRSPNPHLG  
FGGSGAHFCLGANLARLEIELIFNSIADHLPDIRKVAAPQRLRSGWINGI  
RQMPVRYR

>CYP1051A1 (2515747397) *Salinispora arenicola* CNT850



MATDAAITRARTVPAWKALPAAVRDTHRAFDVGNWSDGDVVRVSLGVSR  
PYLVTNPAHVQEVLEHERAAIYPRGDDTALWRSVRKLVGDGILAEGDAAWAA  
SRRVLAPMFRPARINAMVDTMADAIAGAIDDLHGAATAGTPIDVGRELSR  
IVCSAIMRVFFADRITVRDALRIMKAQETIVTAMAPRILAPLVPWWIPMP  
GDRRFRAAVRSIDILLPVLRQAQRQPDDGDDLLSRLVHARADDGRALSE  
KMRDDLVSMAVATTETSTVVLTWLVPLLANHPDVANRLYDEIDRVVGGG  
PVRGDHLAELTYTRMVLDELLRLYPAGWILPRRAATTDILGGVRINKGAT  
VILSPYVTQRMATAWWGPTAEAFDPERFAAGREAADGRHRYAYYPFGVGMH  
RCLGEHLFNLEAILIVATLLSRFRFALTDTSMPGVKVAASTRPARTVEMI  
LKPVAPVPPAR

>CYP105G5 (2515747423) *Salinispora arenicola* CNT850

LTIETTETPPADDSLAPLPRQFMQRDDPSKLPPALAAAEQSPVGRSTL  
PDGDPFWMVSGYDEARAVLSDPRFSSDRFRYHPRFKKLSGQLGERLRNDK  
ARAGSFINMDPPEHTRYRKLLTGQFTVRRMRQLTVRIEQIVTEQVDVMLA  
EGNSADLVSAFAVPVPSLMICELLGVRYEDRTEFQRRAGLLQTDLPKQ  
AVENLEAQRAFMQRLVTDKRRTPADDMISGLVHHAGAEPPLTDDELVGIA  
TLLLFLAGLDTTASMLGLGMFMLLQRPEQMAVLRDDPSRIGAAVEELLRYL  
TVVSTGLFRFAKEDVVLGDEHIPAGSTVVVSLMAANRDGRHWPDPETLDV  
TRVRSSHLAFGHGVHQCLGQQALARIELTVGITELLRRLPNVRLAVPPADV  
PLRNDMITYGVHRLPILWDTF

>CYP107Q4 (2515747424) *Salinispora arenicola* CNT850

MTTTAETSATIDLFSPEVVADPFGWYARLREETGPTTGTLNIGTMMGGP  
EMWLVTTRYEDVRQVLTDPFRFLTNPADSPLEDIRAGVFKRLDFPPDLIPW  
MANLLNVSDGEDHTRLRKLVSYALTAHRIGKLRPRVEKITADLLDKLAED  
GKDGSPVDLVEEYCYPLPVTVICELVGIDEPDRPHWRAWGDSMATMNGER  
IPTTLVKCIELARELIANRAEPQDDLVLTALVQAQAEQDQNRVSDDEIIGI  
LFSLVTAGHQTTTYLIGNSVILLLENPDQLARLKDNPSPMPQAVRELQRL  
GPIQFAQPRFPSEDIELGGVTIPRGAPVAPLLLAANTDPRRFPDPNKLI  
DRLAVGSEHGLGFGKGIHRCLGQHLAYQEAVALQGLFTRFPDLSLAVPR  
EEIPWILRPGFTRTRTLPLKLV

>CYP244A4 (2515747478) *Salinispora arenicola* CNT850

MSTTTNTELTEAPETNMPVDPGLFDCMPDLIAAARVAPVVRIPYLGRHAW  
VVCDELVKQALTHPKMGKDIALVPEWMRQPGMLVTAQPDPEYARAMIMS  
DGENHARIRRIHAPVLSRPNTERWGERVADKVEGFLDELSQAGSGGSTEV  
NVVTNYTHKIPLAFISEMLGLPPEAEHRLRGITDIMLYSSDYAARREAIG  
GLFGAVEDWVRNPADLRDGVITGLLAASDGPDAAVTEGEVIVWTLGMIIT  
GYETTGLISTSLYEAIRPPHERPKTDEDITAWIEETLRVHPPFPHPPTW  
RFPLEDIELGGYLIPIKGAPVQVSIAAANRKPGEAGDSFDAERRGHGHLSE  
GLGMHYCIGAPLVRLEAQIAVRGFLRRFPQARLSAETAVQWESEWMIRRM  
SVLPAVLS

>CYP245A7 (2515747482) *Salinispora arenicola* CNT850

MPSATLPRFALTGWSRENIVNPYPVYQRYREVASVHRGEPGGDAPDTFYV  
FSYDEVVQVLSSNCFGRGRSLDAAKASVPVPAEQKALRAIVENWLVFMDP  
PRHTELRSLLNRSFSPRIVTELPRPRIARIAQELLRLGQQVDVDLVESFA  
APLPILVISELLGIPEERRAWLRANALALQEASSRAGRVDVGYARAEVA  
AQEFTEYFREQVRLRRGRAGGDLITILANAQQRGAPVSLDAIVGTCVHLL  
TAGHETTTNSLAKAVLALREHPTVLDELGAEGLTDDAVEEFLRYDPPVQ  
AVTRWAHQDITLGGCDIPRGSRVVALLGSANRDPARFSPDVLDVRRPAD  
RHLSFGLGIHYCLGATLARAEEIIGLQALLDGVPITLGYGTQHVDYADDLV  
FHGPSRLVLVNLGERCK

>CYP211C1 (2515747985) *Salinispora arenicola* CNT850

VVDVEELLTRLYSAQGRQDPFPVYADLHARGPIAALPPEPERRRVAAVAV  
GYDLVGAVLRDPEWSKAPPPGWTEQEILRTLQTSMMFINPPDHGRMRHVF  
AGTFTPRRLGALEPVVNRVADELDRMADAGAGGLDFVAEFAYPLPARVM  
AEFIGIPETELDWYRERVDVIDAFLDVAGKTPQRLAAANAAGAELEAFYF  
ELLARRRRTPGEDLISGLVEAVDAGGVELTEDELVSNLIVLFNASFVTTV  
YMLSNGLPVLLAHPEVAAAALATDPVLTAGAVDEILRLQAPVHLLARAAPR  
DTVLGGVPIFQGNVLLLLIAAANRDPAHFPDPDRFDPWRSGPPSLAFGLG  
LHYCLGAASRLRGRALPRLLSRFPRLRIMEQPVYSGSLFLRGIDKLSV  
SPGEGSTRE

>CYP154M21 (2515748195) *Salinispora arenicola* CNT850

MEKCPYVLDRAAGSDIHKESNLRRARGPVTLVELHGGYTAVSVTSYEVAKQ  
LLMDPRISKNTKAHWPEFRDGNVPQDWELYTWVAMDNMQTRDGKEHDLRL  
KLVAFAFTGRQAVKSRPIIEEIVNRLLDDLETAPRGQAVDIKARYFYPLS  
TILVCDLLGIAEEDRDVILHGNVVNSKTTNTAESEANLHQWQTALGRV  
ETKRRDPGDDLTTVIIKAGEDEQTPLTDDDEVIGSLHLLIGGGTETTANVL  
CHTVVDMLTHTPDQLAMVRSGAVSWESAWEEEVKRDGAVGSMPPFRCATDDV  
EIGGVTTIAKGDVLVINYAAAGRDPERYGDAAAEFDITRADKANLSFGYGR  
HRCGLPALATMEAMVALPALFDRFPNLALAVPPNELKPPQGTFFNGYAEV  
PLLLRS

>CYP154M13 (2515748196) *Salinispora arenicola* CNT850

MSTGRPVVLDPTGRDIHGEADHLRALGPATLVELPGGVLAWSINSYEVGK  
ALLSAPNVSKSARRHWPAYNGEIPPDWEMISWVAMDNISTTFGGDHRRRL  
RRLTAKAFGSRRAEQVRPMATHMVNTLLDRMADAADAGEVVDLKAAFAYP  
LPGMLVAELIGMSEEARVAAAKVIDMMTATNITPEQAQGVLLGWRDAITD  
LIALKRAQPGDDITSDLIAARDEDGSLLTEQELVDTIFAILGAGSETTIN  
FFDNAITQLLTHPEQLELVKSGQVSWDDVIEEVLRLSPLASLPMRFAVE  
DIQLDGVTTIHRGDPILINYAALGRDPALHGESAGVFDVTRQHKEHLSFGH  
GAHYCLGAGIARMVAKTGLSALFERFPRMTLAVSAKDLVPYPTFIMNGNR  
QLPVHLSGALTWREGEQSALGRA

>CYP105W2 (2515748209) *Salinispora arenicola* CNT850

MTGYQDRPTGDQPGAPVPSGSTDPGIGAFPLPRRCFPSPPAEYARLRAEH  
SVVRLPMLGGDTAWVVSRRHADVRQVLSDFRMSADRRRPGFPKFAPTTEGQ  
RQASFANFRPPLNWLDPPEHAICRRQIVDEFVSRRVRQSRALVERVVDTH  
LDALTAAPGADLVSTFAYPVSSQVICEVLGVYPYGEHEFFERRSTLMFRR  
STPADERARCAREIRDFLDVVVTDKEHRPGDDLLSRLLYRQRRAGGVDHE  
AVVSMAFVLLVAGHVTTSNMLALSVLALLTHPARLARLRAEPERFPAAVE  
ELLRYFTVVEAATARTATAEVTIGGVTTAAGEGVVALGQAANRDPVFEH  
PDEFDPDRDARAHAFGHGRHICPGQHLARLEMEVALSRLFRRLPGLRLT  
MEVSDLPLKEDSNIFGLYALPVAW

>CYP248A2 (2515748216) *Salinispora arenicola* CNT850

VLADAVTAFDPTAVDVRRDPYPSYHWLLRHDPVHRGAHQVWVVSRLFADVR  
AVLGDERFARTGIRRFWTDLVGPGLLSQIVGDIILFQDEPDHGRLRGVVG  
PAFSPSALRRLEPTIEATVNDLLRPARALGAMDVVADLAYPLALRAVLEL  
LGLPAGDANAVGRWSRAVGRTLDRGATAEDMRRGHAAIAEFADYVERALA  
ERREDGADLLALMLAAHRSQMSRNEIVSTVVTFIFTGHETVASQLGNGL  
LSLLDHPEQLELMRRQPHLVPPQAVEECLRFDPVQSNTROLAADVELHGR  
RLRRDDVVVVLAGAANRDPGRYDRPDELDIRRDPVPSMSFGAGMRYCLGS  
YLARLQLRTALGAMVALPDLRLVCNPNELAYQPRMTFRGLTRLPVAFTPA

>CYP154M20 (2515748239) *Salinispora arenicola* CNT850

MERCPYVLDRAGRDLHGEAKALRARGPVTLEVELHGGYTAWSVTSYEIAKQ  
LLVDPRISKNTKETWPEFREGKVPQDWELYTWVAMDNMQTRDGEEDRLR  
KLVAQAFTTRQVAKVRPMIEDIVDRLLDDLEKVPAGEVVDIKGRYFYPLS  
TILVCDLLGIPEADRAEALHGTVVNARTTNSAESEANLHQWQSALSCLV  
ETKRREPGNDITTLIIKAREDEQAPLTDDEVIGSLHLLIGGGTETTSNVL  
CNTLIDLTHPDQMAMIRSGAVGWEAAWEEVEVRKDGAVGSMPPFRCANADI  
EIGGVTTIAKGDVLVINYAAAGRDPERYGDTTAEFDITRADKTNLSFGYGR  
HRCGLPALATMEAMISLPALFERFPDLVLAVPRDELKPQGTFFVNGYAEV  
PMLLRS

>CYP107FJ2 (2515748246) *Salinispora arenicola* CNT850

MSETLSTSVLLADAAEQRAWRAKLRGAGPVHRITTSGETGWLIVGHEEA  
RNALVDLRLQGRATVGHGRMPEDLERALNSHMLNVGPPDHTRLRLRLVS  
AAFTRRRIEQMRPRIQELTDELLDGLAGADEADLVAGLALPLPMRVLVDL  
FGIPAEDCADFNVTWKVLTSAAGVDLDRLLTTAAGEMVAYLRGLLDRKRQV  
PESDLSALVAVRDGADRLSDELTSMVYLLLTAGYETTVNLIGNGLLNL  
LANPEQLVAFKADPDLLPQVVEEAMRFDSPVQIAVRHSTEPVEIAGQAIP  
SGALILVSLWANRDPDRFTEPEAFRVDRQDNPLGFGYGFHHHCIGAPLA  
RMEGTIAIGTVIRRFAPALRLAHPAGSLTWRASMVMHGLTALPVHLR

>CYP105AB8 (2515748415) *Salinispora arenicola* CNT850

MTETASSRHTDTEFPVQRECPFAEPVEYEQIREQSSIAMVRLTGGEAWW  
ISGHEQGRAVLADRRFSSDRKANFPFVSTDPAIRKRLHAQPLSLISMDG  
AEHTQARRALIGEFTVRRLAALRPRIQQIVDQCIDEMLTDDQHRADLVKT  
LSLPVPSLVICELLGVADHDFFQEHTATLVRRNTASEVRQHSIDELNA  
YLGALIDRKLASPDLLGRQIARQHRDGTFRSSMVSLAFLLLVAGHET  
TANMISLGVVGLLQHPEQLTMIKDDPKTPLAIEELLRFFTTIVDSVTSRV  
ATEDVRFQDGTINAGDGVVVSGLSADWDPTVFADPDRLDLERGARRHHLAF  
GFGPHQCLGQNLARLELQIVFDTLFHRIPTLRLAAPLDKIPFKTDAAIYG  
ARELPVAW

>CYP162P1 (2515748449) *Salinispora arenicola* CNT850

MGLPSEVDLAEPDLADPDLYAEGDPDAEWAWLRAHRPVYRNPAGATAEFW  
ALTRYDALQVYRDPSTFSSERGMVLGVDPAAGRMLVVTDPVRHP  
KLRRIVSGIFVPRMTMRLEGRVRSVLDQLLHRVVGAGRCDFVNDVAARL  
PVAIIICELLGVPADEQDWMYHLTSTAFGGGDPAGSAEVSASVERAEAYGDI  
LLYYGELAAERRRRPGDDLVTLLVHADLDGEPLDVEDVLVNCTNLIIGGN  
ETTRHAASGGLLALAQRPELWRRLRETPTAVPTAVEEVLRWTTPGMHVLR  
TATRDTEIGGVPIRAGERVVVWNAANRDEDVFADPQRFIDIDRSPNRHIA  
FGQGGHCLGAALARLELTILFEEMAKQVTNVRLTGPFVRRVRSCVLRGIR  
ALPVELVT

>CYP107AY2 (2515748588) *Salinispora arenicola* CNT850

MTAEPTPIPRSGARLGQEYDQLRKTDGDVHQVLLPDASLAWLVTNPEVAAR  
ALADPRLALNRRNSRGGWSGFALPPALDANLLNLDAPDHTRLRLRVGPAPF  
SPQ RVAALRPGIRRAAEHLLDTLVATSGPTDLVTGYCNPLSVQVIADLMG  
VPEAGRTNLRAWTDMLTSYPPDRDAIRRAVTELGHYVVDLIDIKQQQPG  
DDL SALVTIEQDGDRLSRDELTSALFLILFAGYENTANLIASAVLWLLD

HGGLNVVPSSEAIEGTLRHEPPAPVAIRRFPTEDTIIGDVTIPAGDTVLL  
SVAAATRGADGNAARLAFNGPHYCLGAALARVEAEEALTVLARRLPGLT  
LAVPPSQVRWRPTFRTHGPAELLVGW

>CYP211B2 (2515748721) *Salinispora arenicola* CNT850

MDVSEAI AVLISPSGRLDPYPTYEQLRAHG PVSQTTAGLFVVTGYAEADM  
VLRDPRFVVLDDDLRDDVFPFWQDSPAIKSIARSMRLTNPPDHSRIRRLA  
AGAFTPRRVAAMREVVTQADELVD EMIRAGRDGARVDFMDMFAYPLPVA  
VICALLGVPAADRSRFRRWAGDLTGILEPEITPEELAGADAGADELRDYF  
TGLIEQRRRAPADDLTALVQAHDADGDRLSGEELLANLVVLLVAGFETT  
TNLLGNGLVVLLTRPEAAAAALRDEPD LAPGYVDELLRYDSPVQLTTRTVR  
ESVSFAGTELPAGSWLLVLLGAANRDP RRFDPARFDPGRAQSQPLSFGA  
GPHYCLGAGLARLEAQVAFPLLLRRLPELALAGRPSRRTRLTLRGYETLP  
ITVGAVTADRGTPAGVAPGTP

>CYP105CH1 (2515749056) *Salinispora arenicola* CNT850

VSSLPLPTYPKLRDPADPLLPPAEYLAIQSEKPIAKVLLPSGRPTWLITG  
HALARQVLTEPCVSVDRRHFNFPYPVPNPDAVVAQVARWTYILLGDDPPL  
HTERRRL LISEFTVRQAQAMRPRIQQLVDFHLEQLIAAGPGADFSKHFAM  
KVPSAVICEMLGVPFADHDYFQERTALQLRRDVPVAAQKQAIDELLAYFE  
QLIQEKSSHPGDDVLSRLIVSNRETEAFDHEALVALGLLLLVGGHETTAN  
TLTLATATMLERPEVAEQLR TDPSLMPSAVEEFLRYFSVAVAVSRIATAD  
LQVGGQLVRAGESMLLV LNTIARDGTVFPEPHRLDIRRNARNHLAFSHGI  
HQCMGQNLARVEMQIALD TVLRRLPGLHLVAPFEELPFKYRHLVWGIEEL  
RVAW

>CYP105J3 (2515749213) *Salinispora arenicola* CNT850

MTDSVAFPPQGRVCPHQ PAPGYRPLAVQRPLAQVTLYDGRRVWAVTTRDLA  
RRLLVDPRISSDRTNPAWPAIVPIVAAAVNDAQQKVLKIATALVGTGPE  
HKAQRKMLIPSF TFRMNALRPMIQEIVDQQ LDEMIKSGAPTDLIPAFAS  
AVPVTVLYRLMGIPDDDHGIF EKLSHQLLAGPNANEAYDQLMGYMSRLIA  
ERRRNPGEGLVDDL LAQHGANDDADHDELVSTLVVQVAGNHGTTGSMIAL  
GLFALLQHPEQLAELRADPSLMPTAVDELLRFLSV PDAVTRLAADDIEVE  
GTIIRKGDGVFFITSLINRDTDVHDAPNSLGWHHASAADHLTFGFGAHQC  
LGQSLARITMEIALGALIERLP SLRLAVPAEEVPFLPAASLQVIAELPIT  
W

>CYP107EU1 (2515749294) *Salinispora arenicola* CNT850

VTIGQTL PDLVYSPEFTRDPYAI FARLREQAPVCRVTTHRGMSAWMVTRH  
ADV RALLADNRLAKDGNRIGELMPRHSTLTGAATGFPPGLTTNMVNSDPP  
DHTRLRHLVGREFTGHRVEGLRPRIEEIVDDLLDGVAACGDEADLAETLA  
RRLPIAVIGELLGVPEADRAEFFRWADTLYGGTASPEALGQAYNAIVDYL  
GRLCDAKRDPADDLLTALVQVSADEDRLSREELVSMALLLLVAGHETTS  
KQISNGVLALLLNPEQLKLLKAQPARTAGAVEELLRFEGPSLSASLRFTT  
EPVEVAGVVIPEGEFVLLSLASGNRDPEKFPDPDRLDITRSTQGNLAMGH  
GIHHCVGAAALARLELEIVLSRLVARFPQMQLAVEADDLEWLVNSFFRAPL  
HLPVSLRR

>CYP1198B1 (2515749744) *Salinispora arenicola* CNT850

MSGELTDQRTAPGAGGNPLRSLMDHGIRANPYPLFGELREAGPTAVEDGS  
VVLFG EYEHCSQILRHRDMGSDTSEAPSIKGFVVDDAERAGSSIFFMDQP

GHGRQKRLVSKSFTPRIVKSFGPQITHIVDGLFEDFRDRGELDVVTDLAY  
PVSIGIICDLFGIPDDERDMLKEWSDDLALSTELPTLGAAIGVLNVFTRD  
EINRFGSVAMAAHAYFADLIHRRRKPNPGDDLVSLLATESNGERLTRFEV  
TSVLATLFVAAHESTTNLISGGILALLRNQDQMAVLRENPGIITNVVDES  
LRYDPPVHLAARMARARTTIGGYDLDPGTIVVVLMAAGNRDPRAYENPDV  
FDVNRKIRNVSLAFGAGAHFCIGSGLAKLEAEIAISAFQRLKHPEVDES  
SLEYRRHIVVRGLEHMKVAFQP

>CYP105CT1 (2550298082) *Salinispora arenicola* CNT-088

MNSPNHMPADRSLTAPTSGCPMALSRGGVGLDVADEISELRDGGRLGRIT  
TAFGQEATLITRYDEVRAQMADSVVFNAGVPSPPALVDGGFDTESVRRR  
RTVGNLIMLDPPEHTRLRRMVAAWFTTRRVERLRPRVVEIIDAAALDEMER  
SGPPVDLVAMFAKTVPITVICELIGVPEELRERYRRRAERAVSASAVSTP  
LDELRLREAGWVSRELIEYHRENPSDDIIGMLLREHGTDSDDDGITDDE  
LVGLANALLIAGHETTTQMLSMGTLALLRHPDQLALLRDDPSIVAGAVEE  
LLRYVGVLHGGFVRVATRDTRLGGHRIHAGELVVPALTAANRDPRLTLDG  
DRLDITRPPTSHVAFGHGVHFCIGAPLARMELREAFPALLRRFPGLRLAV  
PDSELEFTQGTTVYSLRGLPVTW

>CYP125A41 (2550299254) *Salinispora arenicola* CNT-088

MTEPRIIPAGFDFTDPEVLAHRVPREEFAELRRTAPVWWNAQPRGSAGFDD  
DGYWVVTRYADVMTVSRSDTYSTRENTAIARLRPDTTREDIEMQRVIML  
NVDPPHEHTKLRAIVSRGFTPRAINALRGSLAERAHEHIVRDAAVRGVGDV  
SDVACELPLQAI AELIGVPQHHRKVFWDNSQLIGYDDPAYGTDPLTASA  
ELLAYAMEMAERQQRSPSDDLVTCLVNAQIDGELTDEFGFFVMLLAVA  
GNETTRNAITHGMAAFLDNPEQWELFKAERPKSAREVEEIRWATPVNVFQR  
TALVDTVLGGQAI SAGQVALFYGSANFDEAVFEDPERFDITRSPNPHLG  
FGGSGAHFCLGANLARLEIELIFNSIADHLPDIRKVAAPQRLRSGWINGI  
RQMPVRYR

>CYP248A2 (2550299356) *Salinispora arenicola* CNT-088

VLADAVTAFDPTAVDVRRDPYPSYHWLLRHDPVHRGAHQVWYVSRFADVR  
AVLGDERFARTGIRRFWTDLVGPGLLSQIVGDIILFQDEPDHG

>CYP107FS2 (2550299391) *Salinispora arenicola* CNT-088

MPVPQGEQNLTTTEVFADPKALFATLGSRQPLHRISLPDGMFAVLVTGNRE  
ARQALSDPRLVRSITAAAPELHKYHPLASDDYALSRHMLFADPPDHGRMR  
KLVSTAFTRRRVEQMRPRIQQITDDLIDVIAAKGEADLVETLALPLPIAV  
ISEMLGVPFADRSEFERHAEVLGTGINASSGFDIAAAGRWFDEYLAELVQ  
QRRREPQDDLISGMLAAQDKGDRLTDVELRSNALLLSAGFETTVNLVAN  
GLLALLRHPEAMAALRSEPNLMTTAVDELLRYDSPVSCVTYHFAQEPVEI  
GGFEIRSGEHVVIAAAAAANHDPTVFADPSRLDLRREGSGQILSFSGIHF  
CLGAPLARLEGEIAFGTVLRLLAGRLAVPTDSLWVKASFVLRRLERLPV  
TFTPDRAPNPIDSVHTV

>CYP105CN1 (2550299392) *Salinispora arenicola* CNT-088

MAAPAPQATQSTTPHPPSYPLPRECPYRPSAGTARLRDAGPVSTVRLYDG  
RTAWLVTGAAEARALLADSRVSNRADFPNYPVMDERHLSMRATREMAREE  
EGGFAAALFGMDPPEHTRQRQLLPRFTVRQVAARRPAIQRIVDEHLDAM  
EANGSPADLVSAFATPVPTMVCVTHLGVYPYQDRTRFEPVAVAGLFEPDRAD

AAMAELTAYLHQLIETKQSEPGDGVIDHLIANHLRPGAIDRAELVAIASA  
ILVAGTVTTSSAIALGTLALLTAPGQYAALVDNPDLPVPGAVNEILRYLSL  
VEQLARVATEDIEIGGKLIRAGDGIIVSFAAGNLDPNVTTHTPDRLDVALP  
PTNHAFSHGIIHCIGQNLALLELDIAFRALVSRFPTLRLAVPAEQLPY  
FAGDVPRLACLPVTW

>CYP105CP2 (2550299394) *Salinispora arenicola* CNT-088

MTKSMPVQDLPAFPIPRECPIYRPSAQHVSLRSGGPMKVRLYNGRTAWLV  
TDSAHAARVLSYRRVSIKPYHGNYPLLNEEFEKVVDSDGYADVLFGVDPP  
EHTRQRQMIMPSFTLRRITAVLRPDIQRIVDDKLDMMRHGAPGDLVTEFA  
QPVPMSVMSFLLGVPWEDHEEFETPAHKLFVPELAEEATTELGAYLERLI  
QKKEQPGGTPGGTGLLDDLRDHLRAGALSDELVHIAMAMLVAGTDTT  
NVISLGTALLDNDPDQWAALRDNDELIPGAVEEILRYTSLIEAFARVAV  
SDIELNGAVIKEGEGILISSAGVNFDPALAPDPGRFDIRPPRPSFSFSH  
GIHRCPGDNLARLELEIAFRSLVTRMPNLRITAKPIDQIPSNNDGTLQRL  
YELPVVW

>CYP211C1 (2550299403) *Salinispora arenicola* CNT-088

VAVGYDLVGAVLRDPEWSKAPPPGWTEQEILRTLQTSMMFINPPDHGRMR  
HVFAGTFTPRRLGALEPVVNRVADELDRMADAGAGGLDFVAEFAYPLPA  
RVMAEFIGIPATELDWYRERVDVIDAFLDVAGKTPQRLAANAAGAE  
FYGELLARRRTPGEDLISGLVEAVDAGGVELTEDELVSNLIVLFNASFV  
TTVYMLSNGLPVLLAHPEVAAAALATDPVLTAGAVDEILRLQAPVHLLARA  
APRDTVLGVPPIQGGQNVLLLVAAANRDPAHFPDPDRFDPWRSGPPSLAF  
GLGLHYCLGAASVRLEGRALPRLLSRFPRLRIMEQPVYSGSLFLRGIDK  
LSVSPGEGSTRE

>CYP244A4 (2550299624) *Salinispora arenicola* CNT-088

MSTTTNTELTEAPETNMPVDPGLFDCMPDLIAAARVAPVVRIPYLG  
VVCDELVKQALTHPKMGKDIALVPEWMRQPGMLVTAQPDPEYARAMIMS  
DGENHARIRRIHAPVLSRPNTERWGERVADKVEGFLDELSQAGSGGSTEV  
NVVTNYTHKIPLAFISEMLGLPPEAEHRLRGITDIMLYSSDYAARREAIG  
GLFGAVEDWVRNPADLRDGVITGLLAASDGPDAAVTEGEVIVWTLGMIIT  
GYETTGSLISTSLYEAIRPPHERPKTDEDITAWIEETLRVHPPFPHTW  
RFPLEDIELGGYLIPKGAPVQVSIAAANRKPGEAGDSFDAERRGHGHSF  
GLGMHYCIGAPLVRLEAQIAVRGFLRRFPQARLSAETAVQWESEWMIRRM  
SVLPAVLS

>CYP107Q4 (2550300485) *Salinispora arenicola* CNT-088

MTTTAETSATIDLFSPEVVADPFGWYARLREETGPTTGTNLNIGTMMGGP  
EMWLVTTRYEDVRQVLTDPRLTNPPADSPLEDIRAGVFKRLDFPPDLIPW  
MANLLNVSDGEDHTRLRKLVSALTARHIGKLRPRVEKITADLLDKLAED  
GKDGSPVDLVEEYCYPLPVTVICELVGIDEPRPHWRAGDSMATMNGER  
IPTTLVKCIELARELIAKRAEPQDDLVLTALVQAQAEQNRVSDDEIIGI  
LFSLVTAGHQTTTYLIGNSVILLLENPDQLARLKENPSMWPAVRELQRL  
GPIQFAQPRFPSEDIELGGVTIPRGAPVAPLLAANTDPRRFPDPNKLII  
DRLAVGSEHGLGFKGKIHRCGLGQHLAYQEAVALQGLFTRFPDLSLAVPR  
EEIPWILRPGFTRTRTLPLKLV

>CYP105G5 (2550300486) *Salinispora arenicola* CNT-088

LTIIETTETPPADDSLRAPLPRQFMQRDDPSKLPALAAAEQSPVGRSTL  
PDGDPFWMVSGYDEARAVLSDPRFSSDRFRYHPRFKKLSGQLGERLRNDK  
ARAGSFINMDPPEHTRYRKLLTGQFTVRRMRQLTVRIEQIVTEQVDVMLA  
EGNSADLVSAFAVPVPSLMICELLGVRYEDRTEFQRRRAAGLLQTDLPKQ  
AVENLEAQRAFMQRLVTDKRRTPADDMISGLVHHAGAEPPLTDDELVGIA  
TLLLFAGLDTTASMLGLGMFMLLQRPEQMAVLRDDPSRIGDAVEELLRYL  
TVVSTGLFRFAKEDVVLGDEHIPAGSTVVVSLMAANRDGRHWPEPETLDV  
TRVRSSHLAFGHGVHQCLGQQLARIELTVGITELLRRLPNVRLAVPPADV  
PLRNDMITYGVHRLPILWDTP

>CYP1051A1 (2550300505) *Salinispora arenicola* CNT-088

MATDAAITRARTVPAWKALPAAVRDTHRAFDVGNWSDGDVVRVSLGVSR  
PYLVTNPAHVQEVLHERAAIYPRGDDTALWRSVRKLVGDGILAEGDAWAA  
SRRVLAPMFRPARINAMVDTMADAIAGAFDDLHGAATAGTPIDVGRELSR  
IVCSAIMRVFFADRITVRDALRIMKAQETIVTAMAPRILAPLPWWIPMP  
GDRRFRAAVRSIDDILLPVLRQAQRQPDGDDLLSRLVRARADDGRALSE  
KRMRDDLVSMAVATTETSTVVLTWLWPLLANHPDVANRLYDEIDRVVGGG  
PVRGDHLAELTYTRMVDELRLYPAGWILPRRAATDVLGGVRINKGAT  
VILSPYVTQRMATAWWGPTAEAFDPERFAAGREAADGRHRYAYYPFGVMH  
RCLGEHLFNLEAILIVATLLSRFRFALTDTSMPGVKVAASTRPARTVEMI  
LKPVAPVPAR

>CYP211B2 (2550300908) *Salinispora arenicola* CNT-088

MDVSEAI AVLISPSGRLDPYPTYEQ LRAHG PVSRTTAGL FVV TGYAEADM  
VLRDPRFVVLDDDLRDDVFPHWQDSPAIXIARSMLRTNPPDHSRIRRLA  
AGAFTPRRVAAMREVVTAAQADELVDEMIRAGRDGARVDFMDMFAYPLPVA  
VICALLGVPAADRSRFRRWAGDLTGILEPEITPEELAGADAGADELRDYF  
TGLIEQRRRAPADDLTALVQAHDADGDRLSGEELLANLVVLLVAGFETT  
TNLLGNGLVVLTRPEAAAAALRDEPD LAPGYVDELLRYDSPVQLTTRTVR  
ESVSFAGTELPADSWLLVLLGAANRDPRRFPDPARFDPGRAQSQPLSFGA  
GPHYCLGAGLARLEAQVAFPLLLRRLPELALAGRPSRRTRLTLRGYETLP  
ITVGAVTADRGT PAGVAPGTP

>CYP105AB8 (2550301157) *Salinispora arenicola* CNT-088

MTETASSRLTDTEFPVQRECPFAEPVEYEQIREQSSIAMVRLTGGGEAWW  
ISGHEQGRAVLADRRFSSDRKANFPFVSTDPAIRKRLHAQPLSLISMDG  
AEHTQARRALIGEFTVRRLAALRPRIQQIVDQCIDEMLTDDQHRADLVKA  
LSLPVPSLVICELLGVYPYADHDFQEHATLVRRNTASEVRQHSIDELNA  
YLGALIDRKLASPDLLGRQIARQHRDGTFRSSMVSLAFLLLVAGHET  
TANMISLGVVGLLQHPEQLAMIKDDPKTPLAIEELLRFFTTIVDSVTSRV  
ATEDVRLGDTTINAGDGVVVSGLSADWDPTVFADPDRLDLERGARHHLAF  
GFGPHQCLGQNLARLELQIVFDTL FHRIPTLRLAAPLDKIPFKTDAAIYG  
ARELPVAW

>CYP245A7 (2550301247) *Salinispora arenicola* CNT-088

PPVQAVTRWAHQDTTLGGCDIPRGSRVVALLGSANRDPARFPSPDVLDVR  
RPADRHL SFG LGIHYCLGATLARAEELEIGLQALLDGVP TLGYGTQHVDYA  
DDL VFHGPSRLVLVNLGERCK

>CYP154M5 (2550301334) *Salinispora arenicola* CNT-088

VEQSCP YKLDVTGRDVHAEGEAI RARGPVAQVELPGGVQGSV TGYQAAR

QVLADPRFAKDPKKWPAYTSGAIPPNWPLIGWLLMDNMTTNDGADHQRLR  
KLVSHGFTPRQVERTRPLIVKIVNDLLDGLSSAGPDEVVDLKGRFATPLP  
ARVICDMFGVPEALRASVLRGAQVNVTSISGEEAEANVEQWHRELLELV  
EAKREKPDDEMASLLIAAKEEDGSTLTQEEVVGTLHLMLGAGSETLMNAL  
SYAVLGMLSNPGQYEMVRNGTSSWDDVIEETLRAQAPVAQLPLRYATEDV  
AVGGAVIKAGDPVLMGFTAIGRDPVHGETAGDYDITREDKTHLSFGHGV  
HFCLGAPLARLELKIALPALFERFPNMTLAVRPDQLEPQGTFFIMNGHREL  
PVRLGQPATVLA

>CYP105CH1 (2550302278) *Salinispora arenicola* CNT-088

VSSLPLPTYPKLRDPADPLLPAPAEYLAIQSEKPIAKVLLPSGRPTWLITG  
HALARQVLTEPCVSVDRRHPNFPYPVPNPDAVVAQVARWTYILLGDDPPL  
HTERRRLLI SEFTVRQAQAMRPRIQQLVDFHLEQLIAAGPGADFSKHFAM  
KVPSAVICEMLGVPFADHDYFQERTALQLRRDVPVAAQKQAIDELLAYFE  
QLIQEKSSHPGDDVLSRLIVSNRETEAFDHEALVALGLLLLLVGGHETTAN  
TLTLATATMLERPEIAEQLRDPSLMPSAVEEFLRYFSVAVAVSRIATAD  
LQVGGQLVRAGESMLLVNLTARDGTVPFEPHRLDIRRNARNHLAFSHGI  
HQCMGQNLARVEMQIALDTVLRRLPGLHLVAPFEELPFKYRHLVWGIEEL  
RVAW

>CYP1198B1 (2550302288) *Salinispora arenicola* CNT-088

MSGELTDQRTAPGAGGNPLRSLMDHGIRANPYPLFGELREAGPTAVEDGS  
VVLFGHEYHCSQILRHRDMGSDTSEAPSIKGFVVDDAERAGSSIFFMDQP  
GHGRQRLVSKSFTPRIVKSFGPQIAHIVDGLFEDFRDRGELDVVTDLAY  
PVSIGIICDLFGIPDDERDMLKEWSDDLALSTELPTLGAAIGVLNVFTRD  
EINRFGSVAMAAHAYFADLIHRRRKPNPGDDLVSLLATESNGERLTRFEV  
TSVLATLFVAAHESTTNLISGGILALLRNQDQMAVLRENPGITNVVDES  
LRYDPPVHLAARMARARTTIGGYDLDPGTIVVVLMAAGNRDPAYESP  
FDVNRKIRNVSLAFGAGAHFCIGSGLAKLEAEIAISAFQRLKHPEVDES  
SLEYRRHIVVRGLEHMKVSFQP

>CYP107EU1 (2550302320) *Salinispora arenicola* CNT-088

VTIGQTLPLVYSPEFTRDPYAI FARLREQAPVCRVTTHRGMSAWMVTRH  
ADVRALLADNRLAKDGNRIGELMPRHSTLTGAATGFPPGLTTNMVNSDPP  
DHTRLRHLVGREFTGHRVEGLRPRIEEIVDDLLDGVAACGDEADLAETLA  
RRLPIAVIGELLGVPEADRAEFFRWADTLYGGTASPEALGQAYNAIVDYL  
GRLCDAKRDPADLLTALVQVSADEDRLSREELVSMALLLVAGHETTS  
KQISNGVLALLLNPEQLKLLKAQPARTAGAVEELLRFEGPSLSASLRFTT  
EPVEVAGVVIPEGEFVLLSLASGNRDPEKFPDPDRDLITRSTQGNLAMGH  
GIHHCVGAALARLELEIVLSRLVARFPQMQLAVEADDLEWLVNSFFRAPL  
HLPVSLRR

>CYP248A2 (2550302578) *Salinispora arenicola* CNT-088

ALAEERREDGADLLALMLAAHRSQILMSRNEIVSTVVTFIFTGHETVASQLG  
NGLLSLLDHPEQMELMRRQPHLVPAVEECLRFDPVQSNTRQLVADVEL  
HGRRLRRDDVVVVLAGAANRDPGRYDRPDELDIRRDPVPSMSFGAGMRYC  
LGSYLARLQLRTALGAMVALPDLRLVCSPNELAYQPRMTMFRGLTRLPVAF  
TPAG

>CYP245A7 (2550302811) *Salinispora arenicola* CNT-088

MPSATLPRFALTGWSRENIVNPYPVYQRYREVASVHRGEPGGDAPDTFYV



FSYDEVVQVLSSNCFGRGRSLDAAKASVPVPAEQKALRAIVENWLVMFMDP  
PRHTELRSLLNRSFSPRIVTELPRPRIARIAQELLSSRLGQQVDVLDVESFA  
APLPILVISELLGIPEERRAWLRANALALQEASSSRAGRDVDGYARAEVA  
AQEFTEYFREQVRLRRGRAGGDLITILANAQQRGAPVSLDAIVGTCVHLL  
TAGHETTTNSLAKAVLALREHPAVLDEL

>CYP208A12 (2550303181) *Salinispora arenicola* CNT-088

MTLDTITPRVPLGPPTAALRMLLVMKRDRLGMLTSAAARYGDASRLPVG  
HKALWFFNHPRYAKHVLADNSANYHKGIGLVHARRALGDGLLTSEGLWR  
KQRKVIQPAFQSRRIAQQAGMIAEEAFALVERLRARAGAGPVELTAEITG  
LTLGVLGRSLLDADLAGFDSIGDSFATVQDQAMFELETINAVPMWIPLPR  
QIRFRARRRKLQAVVDTLVDGRAGNLADRVDVLSRLILSARGEADPRVGR  
ERLRDELVTLLLAGHETTASTLGWTLSLIDRHGPGVWERLHAEAVEVLGDR  
LPEYDDLRLRLRYTVMVVEEAMRLFPPVWLLPRRALAPDTIGEYRVPANAD  
VVISPYTLHRHPEFWNPFRFDPERFAPGQAADRPRYAYLPFGAGPRFCV  
GNNLGMMEAVFVIALLCRHLRLTGVPGYRLVPEPMLSLRIRGGPLVVRP  
VS

>CYP166A4 (2550303626) *Salinispora arenicola* CNT-088

MTDAISFELPWARTDKFDPPAVFDALREQRPLARMRYPDGHVGVIVSSYE  
LVREVLGDPRFHSKCAVGHFPVTHQGGQVIPTHPQIPGMFIHMDPPEHTRY  
RRLLTGEFTVRRTSRLTGHVEGVATEQIEVMREHGAPADLVATFARPLVL  
RVLSGLVGLPYGERDRYLHAVTLLHDAEADPAEAAAAYEQAGAYFDEVIE  
RRRRQPEDDLISTLVGGGELTGEELRNIVTLLLFAGYETTESALAVGMFA  
LLHHEDQLARLRADPTKIDAAIEELLRYLTVNQYHTYRTASEDIELHGEV  
INKGDSVTVSLPAANRDPARFACPAELDIDRETSGHVAFGFGIHCQLGQN  
LARVELRAGLSALLRAFPNRLRLAVPADEVPLRLQGSVFAVKNLPVCW

>CYP105BL2 (2550303802) *Salinispora arenicola* CNT-088

MSSHSAAPDPETATPLHTLAPELTFPQFERSTPFDPQAYTELSGRCPV  
APVSMADGKPSWLITSFEGVRTTSLDPRFSSDMSHPGFNRTGKPVDDL  
KDTLGAMDGERHRYRRLMTGELTVRRAKAMRPVITQITDEALDQLAAAG  
PGADLVKHVAFVVPSPRVACHLVGIPLSYELFTGMAATLMDSTSSDDQFA  
ALQNMVSYFDTLVTDREHHDRDDLGHMVRRYLATGELTRDMLIRLAWTT  
MAAGQETTAHMIGLGVAALLRHPDQLELLRREPHLLPGAVDELMRYLPLI  
QFGIPRVAMDDVEVDGQTVTAGEGVVALPPLANRDPVFERPDELDVRN  
ARQHLTFGYGPHQCBAHALARLELEVYGRLLERFPTLRLADSDADLKVQ  
DKDIMYRVSELAVTW

>CYP1005A1 (2550303875) *Salinispora arenicola* CNT-088

AGVTPAPGLRAGAHRCGLDQLARMEAAVVVEQATPLLDGVTVVRPPWYPD  
NLTFRMPDAFVVR

>CYP1005A1 (2550303876) *Salinispora arenicola* CNT-088

VSAVLFRSWTKTAGTRWPDVTRVADQSGTEHLVVTRHALVRQVLTQATY  
RPDNAMEAVTPVPVAALRVLGHRFRLPPTLANNGGVSHPAIRALVADAL  
HPTKVAAQRPWLTGLVADRVASIRTTLDSSGGPVDLYADLTADLPLLVLAR  
LVELPDAPVNAVKKQFARAALFWAPLDADRQLALADEVGRFHVQLREFA  
DTGGGLAAALRATGHSPDVLVGALFFLLVAGQETTSQFLTLLHRLSGEP

TIRAALRAGSISVADVVEEGLRLEPPIVTWRRVAAVDSTLGGTTVAAGTS  
VLLWL

>CYP105W2 (2550304237) *Salinispora arenicola* CNT-088

MTGYQDRPTGDQPGAPVPSGSTDPGIGAFPLPRRCFSPPAEYARLRAEH  
PVVRLPMLGGDTAWVVSRRHADVRQVLSDPRMSADRRRPGFPGFAPTTGQ  
RQASFANFRPPLNWLDPPEHAICRRQIVDEFVRRVRQSRALVERVVDTH  
LDALTAAPGADLVSTFAYPVPSQVICEVLGVYPYGEHEFFERRSTLMFRR  
STPADERARCAREIRDFLDMVVTDKERRPGDDVLSRLLYRQRRAGGMDHE  
AVVSMAFVLLVAGHVTTSNMIALSVLALLTHPARLARLRAEPERFPAAVE  
ELLRYFTVVEAATARTTTAEVTIGGVTIAAGEGVVALGQAANRDPRVFEH  
PDEFDPDRDARAHLAFGHGRHICPGQHLARLEMEVALSRLFRRLPGLRLT  
MEVSDLPLKEDSNIFGLYALPVAW

>CYP107AW10 (2561673213) *Salinispora pacifica* CNT133A

VETVTGTSTPPPMPIADPYPTLARIRANGPVSIHSDGIPMWVIARYR  
DVRTALADPRFGQDARRAQALADNRVAGVTLGGDIVHMLNSDPPDHTRLR  
RHHVQGAFTARRVAAMRPLVERITTSLLDGLTGRTTVDLVQDFAFPLPMLV  
ICELLGFPAEERNAYRSWSTTILTHDDDPAAAFATALREMTDYIAVQLRIR  
QTRPGDDILTELLAARDAGQLTDEEIIIGMVFLLLIGGHETTNNLLGTAIL  
ALMRNPDQHRWLLANQHALPKAIDEFLRYESPAMATLRFTTTPVTIDDV  
VIPAGELVLVSLGGANRDPDRFPEADRLILDRRDTGHLAFGHGLHRCCLGA  
FLGKLEGEVALGALLRRHPRLALAAEVRQLRWRDTIMLRGLESPLVSLHG

>CYP211B11 (2561673563) *Salinispora pacifica* CNT133A

MDASEAVALLISPPGRLDPYPTYERLRAHGPPVSTAPGFFVVTGYTEADT  
LLRNPRFEVMEDEERDGVFPQWQDSPAMISISRSMIRANPPDHSRMRRLA  
AGVFTPRRVAALREVVAQAADGLVDEMIRAGRGAAVDFMGSFAYPLPVT  
VICALLGVPTADWARFRHWASDLTGVLPEEITPQELAIADAGASELRDYF  
TELIAQRRRAPADDLTALVQAHDADGDRLSGEELLANLVLLLVAGFETT  
TNLLGNGLVLLTHPDSATALRGQPELAPGYVEEFRLRYDSPVQLTSRMVR  
ESVSLAGVELPAGSWLLVLLGAANRDPARFTDPARFDPRRSQSPPLSFGA  
GAHYCLGAGLARLEAQVAFPLLLRRLPELALAGEPTRRHRLTLRGYETLP  
VTVGAVPADPGTPAGVALGTP

>CYP125A65 (2561673645) *Salinispora pacifica* CNT133A

MTEPRIPVGFDFTDPAVLERRVPREEFAELRRAPVWWNVQPRGSAGFDD  
DGYWVVTRYADVMAVSRDSEYSTRENTAIARFQPGTTQADREMQRVIMI  
NVDPPPEHTKLRAIVSRGFTPRAINALRGSLAERAHEHIVRDAAVRGTGDFV  
TDVACELPLQAI AELIGVPQHHRKVF'DWSNQLIGYDDPAYGVDPMAAAA  
ELLAYAMEMANERQRNPSDDLVTCLVNAQIDGEHLTTDEFGGFFVMLLAVA  
GNETTRNAITHGMLAFLEHPDQWELFKAERPRSAVEEIIIRWATPVNVFQR  
TALVDTTLGGQAITAGQRVALFYGSANFDESVEEPERFDITRSPNPHLG  
FGGSGVHFCLGANLARLEIELIFNSIADHMPDIRKVADPQRLRSGWINGI  
REMPVRYR

>CYP244A12 (2561674687) *Salinispora pacifica* CNT133A

MQDTAHVNLA EAPTVTMPIELRPTDCLPELLAAARVAPIVRTPYLDQHAW  
VVCDELVKQALTHPKLGKDVALAPDWMRQPGQMVTAMPPPEYARMVMS  
DGEHHARIRRIHAPVLSRNTGRWSERVAAL IAGFLDNLDSADGTEVNLI  
TDYTQKIPLAFTA EMLGLPPGVERRLHDITEVMLYSADYALRQHAVGELF  
EAVQEWVRDPAELRDGVITGLLASTDGP DARVTEGEAIVWTL SLIINGYE

TTGSLISAALYEALRRPAPERPHTDEAVAAWIEETLRVQPPVPHTTWRFALADLDLGGYLIPKGAPVQISLAAANLDPDEAADSFDAQRRGRGHLSFGLGAHYCIGAPLARVQTKIALRGFLRRFPQARLSADTAPRWESEWMIRMSVLPVLLA

>CYP107AY8 (2561674709) *Salinispora pacifica* CNT133A

MRAELAPIPRSGARLGPEYDQLRKTGDVHQVLLPDTSMAWLVTSPELVSRALADPRLALNRKHSRGGWSGFALPPALDANLLNLDAPDHTRLRRLVGPAPSPQRVAALRPRIQRSAEELAETVVATGSPVDLVTSYCTPLSVQVIADLLGVPEAGRTDLRAWTDMLTSYPPDRDAIRQAVVELHGYVNNLIEAKRQRPGLDGLLSALVATEQEGDRLTRDELTSIAFLILFAGYENTANLIASTVLRLLGHGSLRGVRVPEAIEETLRLEPPAPAAIRRFPTTEMTIGGATIPAGDTVLLSIAAATRGADGNPARLAFGNPHFCLGAALARVEAEEAITVLARRLPGLALAVPGASVRWRPTFRTHGPAELLVAW

>CYP208A30 (2561675070) *Salinispora pacifica* CNT133A

MTVTAAGRTFSGPTGSALLRSLWQLGRDRLGLMTSAARYGDAVRLGVGSRSLYFFNHPDHAKHVLADNSGNYTKGIGLVHARRALGDGLLTSEGELWREQRRVMQPVFQAKRIAGQAHAVAEADRLRLARRRGGGPVNLTDEFTALT LGVLGRTLDDAKLDAFASVGAAFEEMQNQAMFEMASMSLVPMWVPLPQQLRFRRARRELERIVGRLVADRTARGEVTGADDALSRLIAATQDEPDPGFARRMRDELVTLLLAGHETTASTLSWTFHLVNQHPWVRGRLRKEAIEVLGDR LPEYADLARLTYTKMVVSEAMRLYPPVWMLSRLARDADVVDGYVPVADADVLICPYTLHRHPAFWPEPERFDPERFDPGAVTDRPRYAYVPFGAGPRFCIGNHLGLMEAVFVVMVVSREFELVAPVGPVVAEPMLSLRIRGGLSMTVEPVS

>CYP1005A6 (2561675753) *Salinispora pacifica* CNT133A

VSAVLFRSWTKTAGTHWPAVTRVADQQGTEHLVVTEHALVRQVLTQVQTYRPDNALDAVTPIPVAAALRVLAGHRFRLPPTLANNGGTSHPAIRALVADALHPAKVAAQRPWLTELVAERIAAIRATLDSGGSADLHAELSADLPLLVLARLVELPDAPVSAVKQFARAALFVWAPLDADRQLALADEVGRFHQVLRFEADTGGGLAAALRATGHPPDVLVGALFFLLVAGQETTSQFLTLLHLRLAGEPTVRAALRDGSVSVPNVVEEGLRLEPPIVTVRRVAAVDSTLGGTAVPAGTSVLLWLARAGRDPAIVPAPDEFPRPGQRGSRRHLAFGAGAHRCCLGDQLARMEA AAVVVERVTPLLDGVTVVRAPWYPDNLTRMPDAFVIRR

>CYP107LA2 (2561676342) *Salinispora pacifica* CNT133A

MECPVTARSSRFYFPFSDRADLILDPTYGELRSKEPVARVRMPYGGGDAWL VTRHADAKKALSDPRLSIAAGAGRDVPRASPRIQEAEGLMGMPPEAHARL RRLVATAFTPRRVRDIAPRVAEIAADRLVNDVIETGPPADLVRQIALPVPI TIICELMGVPAEDQHVFVRVFSDALMSSTRYTDDEVDQAVQEFETAYLGGLL TQRRAHRTDDLIGALIEARDDGERLSEELIMLTGGLLVGGHETTASQIA SHLLVLLRDRARYETLSARPELIPTAVEELLRVAPMWVTVGPTRIATEDL ELNGVTIRAGDAVIFSLSSANLDEDAFPDATDVVLDRPNPHIAFGHGPH FCIGANLARLEIQSTIGALVRRRLPGLRLAVEENDLEWRRGMIVRSLAALPVTW

>CYP113B7 (2561676343) *Salinispora pacifica* CNT133A

MTQTDNAPMPFLDLPGKADAQGLLDWFAYMREHSPVSWDETRQAWHVFN YQDYLTVTTNPLIFSSDSFSPVFPVPPPELALLMGPGTIGGIDPPRHGPMRKL

VSQAFTPRRIAQMEDIETITADIFEQVRGQERIDIAADLAYPLPVTVIA  
DMLGIPNEDHEKFREWVDIILSNEGLEYPNLPDDFTETVGPAAEWSEFL  
YAQIAEKRRARPQDDLMSSGLLAVEVEGRRLTDEEVVNIVALLLTAGHISSA  
TLLSNLFLVLEEHPAALAAVRADRSVPGVVEETLRWRSPFNCIFRLLAQ  
DTEIFGQPMRKGQMVIAWIASANRDTEVFAEPDFTDIRRKSNNKHLAFGYG  
IHHCLGAFLARQEAQVFLNQVLDEFSEFTIDHDGVEFYDPDQLTARRLPV  
QVVR

>CYP163B20 (2561676835) *Salinispora pacifica* CNT133A

VTATDAKDVGVGSRNVASTIDLADPATFAGHDLTNFWQRLRDEEPIYWN  
PPTSGRRGFVWLSRHADILEVYRDDMTFTSERGNVLVTLLAGGDAGAGRM  
LAVTDGPRHTELRLKLLLRALGPRVLGPVCRAVRANTRQMIGEAAAANGECD  
FATDIASRIPMITISNLLGVPEADRASLLKMTKTALSADDESISDSDSEM  
ARNEILLYFQDFVEFRKNPGEDEVVSMVLNSSIDGVPLSDDDIVLNCYSL  
IIGGDETSRLTMIDSINTLAANPGQWRRLKEGRCDIDKAVDEVLRWASPS  
MHFGRTAVRETVIHGERIQVDDIVTLWGASGNRDERAFKQPEVFDLGRVP  
NRHLSFGHGPHYICISYLAKVEISELLIALRDLILGFVIGEPQIRSNL  
LSGFSTMPVRFDADRTGLASEAREG

>CYP105AB37 (2561676961) *Salinispora pacifica* CNT133A

MTETASTTTPGISSATTTPRISSTTTSGPASGEVTDAEFFPVKRGCPFFSTPT  
EYEQIREHSPKAVRLTTGREAWWIAGHELGRAVLADRRFSSDRRRDNFP  
FVSTDPETKKQLQDQPTSMIGMDGAHAQARRALMGFTVRRMAGLRPRI  
QQIVDQIHIDEMSSDQRTADLVEALSLPVPSLVICELLGVYPYADHDFQ  
RSGPLIRHTTSTEVRRLRIQKELNTYLGALIDRKVTDPTDDLRSQIAKHH  
AAGTFDRTSLVSMFAFLLLIAGHETTANMISLGVVGLLQHPDQLVMIKEDP  
EKTPPAVEELLRYFTIADTVTARVATEDVQLGDTTINAGDGVVISGLAAD  
HDPTVFTDPDRLDLERGARRHVAFGFGPHQCIGQTLARMELQIVFDTLFR  
RIPTLRLAAPLDDIPFKSDAFVYGAERLPVAV

>CYP107E37 (2561677041) *Salinispora pacifica* CNT133A

VTIDQEIRKYPFRESPIGIGIDPTYELLRRTEPLARVQLPYGEVSWLVTRY  
EDVKTVLTDPRFSRAAAQGKDQPRTRAEMTYEGIIIGLDPDPDHTRLRLLAG  
KALTARRVNAIRADAQRIANEYVDEMIAKGSPGDLVELFALPYPVTVICE  
LLGVPFEDRAQFRIWTEGLTSTSEQLMVYAEQLFGYMGKLVAQRRAEPTD  
DLLGALVKARDEGDRLTEQELLSIAGVGLLLTGVEVTVSTHINPFIYALLT  
HPELMAQLRADRSVPAAVEELLRMIPLNPAAMFPRYAVEDVTLSGITVR  
AGQPVLVSLPGANRDPEVFENPETFDFTRDQNPVAFGHGPHHCLGAQLA  
RMELQVALHTVLDLRFDPDLRLADGDEGVSWKSGLLVRGPSRLLVGW

>CYP107AX6 (2561677097) *Salinispora pacifica* CNT133A

MTSPAPVFDQLLLCDPHRRYNALRDEAPVHHIRTPDGAPAWLVTRYHDV  
RAAFTDPRLSVDKRLSSTDGEHGSSLPPELDAHLLNRDPPDHTRLRLRLAA  
AAFTPRRIADLRPAVERIVSTLLDGLAGHDQAELIGSLASPLPLQVMQEL  
LGLPTQTSVDFRTWTNTLLSADANQPAQSRSAMANMRRFLVEQLAHKRAQ  
PGDDLLTGLLAAREGDWLTDDDELVAMFLFLMFAGYDNTAALIGNVAHAL  
LTNAELPAAVHTGSLAVDELVDGVLRWNPSFPLAVRRFAREPIITIAQAI  
PAGDRIWLCLASANRDPAQFTEPDTLGTGMRRPHLSFGHGIHYCLGAPL  
ARLQTTVAVTSLLDLRFPGIRLAVPAQDIRWRESFRLRGLVALPVFL

>CYP211B2 (2563513881) *Salinispora arenicola* CNY666

MDASEAVALLMSPPGRLDPYPTYERLRAHGPPVPTAAGFFVVTGYTEADT  
VLRTPRFRGVMDDDEERDSVFPWHQESPAAMMSIAQSMIRANPPDHSRMRLA  
AKAFTPRRVAALREVVAQAADGLVDEMIRAGRGGAPVDFLASFAYPLPVA  
VICALLGVPAADWAQFRRWASDLTGVLEPEITPQELAVADAGAGELRDYF  
TELVAQRRRAPADDLTALVRAHDADGDRLSGEELLANLVLLLVAGFETT  
TNLLGNGLVLLDHPDSATALRDQPELAPGYVEELLRYDSPVQLTTRTVR  
ESVPLAGVELPAGSWLLVLLGAANRDPARFTDPARFDPRAQSPPLSFGA  
GAHYCLGAGLARLEAQVAFPLLLRRLPELALAGEPIRRNRRLTLRGYETLP  
VTVGAVAADHGTAPAGVALGTP

>CYP1005A6 (2563514182) *Salinispora arenicola* CNY666

VSAVLFRSWTKTAGTHWPAVTRVADQQGTEHLVVTEHALVRQVLTQVTV  
RPDNALDAVTPIPVAAALRVLAGHRFRLPPTLANNGGVNHPAIRALVADAL  
HPTKVAAQRPWLTELVAERVAAIRATLDSGGSADLHAELSADLPLLVLAR  
LVELPDAPVSAVKQFARAALFWAPLDTDRQLALADEVGRFHQVLRFA  
DTGGGLAAALRATGHPPDVLVGALFFLLVAGQETTSQFLTLLHRLAGEP  
TVRAALRDGSVSVPNVVEEGLRLEPPIVTWRRVAAVDSTLGGTAVPAGTS  
VLLWLARAGRDPPIVPAPDEFPRPGQRGSRRHLAFGAGAHRCGLGDLARME  
AAVVVERVTPLLDGVTVVRAPWYPDNLTFRMPDAFVIRRRPAGSAEH

>CYP208A29 (2563514392) *Salinispora arenicola* CNY666

MTTSSNRQRPFGPPRAAALSMLLTMSRDRLGMMTAAAGAYGDAAWLPVG  
HKALYLFNHPDYAKHVLNTENSNDNYTKGIGLVHARRALGDGLLTSEGELWR  
EQRRVIRPSFRSGRAPDQASVIAEEVARLVERLRARAGGPPVNVVTEFTG  
LTLGVLGRTLDDVLTALATVGDAFAAVQDQAMFELVTL SAVPTWIPLTR  
QRRFRARAELERIVDELVARRGDVSGRDDVLSRLIRSTGAEPDARVRRQ  
RLRDELVTLLLAGHETTASTLGWTLYLIDRHPPVRERLRAEAVEVLGDRL  
PAYRDLPLRFTTMVVQEAMRLYPPVWLLPRRSRRADRVGPYLV PAGSDV  
VVSPYTMHRHPEFWPEPDRFDPLRFDPRNAADRPRYAYLPFGAGPRVCVG  
SNLGTMEAVIAVAMLCRELRLVRVPHTAAVPEPMLSLRIRGGLPMSVHLA  
D

>CYP154M16 (2563514407) *Salinispora arenicola* CNY666

MPDRCPVLDPSGRDIHAEADRLRAQAPAVKVELPGGVHAWISITSYDVVKR  
LLLDNRNVTKNARNHWPKFINGEIPPDWEMISWVAMDNMVTAYGKHLVRLR  
RLIAKAFTAQRVETVRPQVEKLVDLDDGLAAETGEVVDLREKFCYPLPA  
LLIAELIGMTEQQRAQTAKAMDLMVDTTVSPEQAQAILTGWRTAMDELIA  
AKRREP GKDIASDLIAARDDENGGQLTDSLELDTIFAILGAGSETTINFL  
DNAVTALVTHPGQLELVRSRGRAGWDDVIDEVLRVQCPLASLPLRYAVTDI  
ELDGVTIPQGDPIILINYAAAGRDPALHGDTAGEFDVTREHKEHVSFGHGP  
HYCLGAGIARLVATIGLSRLFERFPDLRLAVPAEELQPLPTFIMNGHRGL  
PVRLVPAPAAATAV

>CYP125A66 (2563515640) *Salinispora arenicola* CNY666

MTEPRIPVGFDFTDPAVLERRVPREEFAELRRAPVWWNAQPKGSAGFDD  
DGYWVVTRYADVMASRDSETYSTRENTAIARYQPGTTQADLEMQRVIMI  
NVDPPEHTKLRAIVSRGFTPRAIDALRGSLAERAERIVRDAAVRGTGDFV  
TDVACELPLQAI AELIGVPQHHRKVFWDWSNQLIGYDDPAYGVDPLAAAA  
ELLAYAMEMAHERQRNPSEDLVTKLVNAQIDGEHLTADEF GFFVMLLAVA  
GNETTRNAITHGMLAFFENPEQWELFKAERPRSAVEEII RWATPVNVFQR  
TALVDTTLGGQAI SAGQRVALFYGSANFDES VFEEPERFDITRSPNPHLG  
FGGSGVHFCLGANLARLEIELIFNSIADHMPDISKLADPQRLRSGWINGI

RELPVQYH

>CYP107EP2 (2563516684) *Salinispora arenicola* CNY666

MTTLPDAGLRARMAGYYDILEKAADQGDLYARLLRGPADPYPVYEQIRAL  
GPLPRSALGTWVTTDHQIANKVLRDRRFVRLADGQKVPEFMNFDNSILG  
LDPPNHARLRKLTIPALNPRMAGRWRDRADQLCAQFIDELPTDGSADFDM  
TEFAQKLPVTVIADLVGIPDDLPRFRSRLSRRIAPLLDGVVSFHKVRGVD  
LAIDELTDMFRGIIKLRQENPGDDLISQMLPAIDDGRLTMDELEPLCMFL  
PLAGSETTVNLIGNVRLALLANPEQWDMLRADPAGLAAGVVEETLRFDPP  
VQQYRRVAHQEIELAGEILPVDGELAILAAAAANRDPVDFDDPHRYDITRR  
SAADTLSFSAGIHYCLGAPLARVEAEEAFRAIATRLPDLRVAGEPRRRDS  
FIIHGMLHFPLSTG

>CYP107NE1 (2563517046) *Salinispora arenicola* CNY666

MTTAGTRLLFDLRDPALQDDRYGYYRRVRDVEPVHRSPLGYWVITGYDEC  
DAVLRSPGVSTDFTDPPQWARVRGGPDSPVVASARRWMLTRGGGDHRRLR  
RMVSRALSPAAMARLRPRIRTLNVEMIDAMGEGEADLISGLALPLPVVVV  
CELVGIPLADADRCRQWTNTIADVVDPMVTPMRMRMNEAVPEFSAYIAE  
RLAERRAEPRDDLSSILLEPDARGDRLSDEDIAAQILVLFNAGHETSVNV  
IGNGMVSLQLQNPDLRLRLREHPELVERSFDLSRHNSAVQIMARQTVAPV  
QVGGVTIPAGASVFIVLGAHHDPVKYPDPERFDVTRTGTSPLIIFGSGPH  
YCIAATLGRMEVVIAFEELLRRYSSIELATTELPWYSHFTFLLGLRSLPL  
RLTYAR

>CYP107AY11 (2563517542) *Salinispora arenicola* CNY666

MSQDQPTRAELAPIPRSGARIGPEYDQLRKAGDVHQVLLPDSSSLAWLVTS  
PELVSRALADPRLALNRKHSRGGWSGFALPPALDANLLNLDAPDHTRLRR  
LVGPAFSPQORVAALRPRIQRTAEELADTVVATGSPVDLVTGYCTPLSVQV  
IADLLGVPEAGRADLRAWTDMLTSYPPDRDAIRQAVVELHGYYVNLIEA  
KQQRPGDDLSSALVATEQEGDRLTRDELTSLAFLILFAGYENTANLIAS  
VLRLLDDGSLRGVRASEAIEETLRLEPPAPAAIRRFPTTEMTIGGATIPA  
GDTVLLSIVAATRGADANPARLAFGNGPHFCLGAGLARVEAEEAITVLAR  
RLPSLALAVPGAPVRWRPSPFRTHGPAELLVAW

>CYP162A7 (2563517680) *Salinispora arenicola* CNY666

MISPDLSDPIFYQNSDPLPVWERLRREHPVYDNRRANGARFWAVMTHKLC  
TDMLTNPKVFSSANGMRLDSNPQVLARAAGKMLNVTDPQHDKIRKLVSS  
AFTPTIRRLEANMRATAGRAIDLAIADGSCELTRLAHKLPVSVICDLLG  
VPEQDWDFMAERTRFAWGSTAADDREEVEKVAHAHEIMAYFLDLAADRRK  
RPMEDLVLSALVHGEVDGRALTDDEVLYNCDALLSGGNETTRHATVGGLLA  
FVMNPDEWSAIRQNRDLLPSAIQEVVRYTSPVMHSLRTATRDVELGGINI  
RAGEYVVAWLPSANRDEQLFDDPDRFNVRSPNRHLGFIQGNHHCIGSGL  
ATMELTVMFDELLNRVSEVRLAGPVRRLRSNLLWGFDSLFPVTFHAGAGR

>CYP1278A5 (2563518156) *Salinispora arenicola* CNY666

MPSPVGAVVHPNPYPYYAAMVAERPFFHFDEQLDTWVAASAAAAQAVLTAP  
GCRVRPPHEPVPQGIGTGPAGDVFGNLRMTDGEPOHRLKAIVTQALGAV  
DRSTVAATAMQORARQVLNDSVRTPYEQMLFELPAQVVATLCGLDPAAGGE  
ATRLVGHFVQCIPATASPEQQQRAAQAAGLQELLGPKLDDTQHGLLGDL  
VRMATHVGWTDRAPLLANGIGFLSQTYDATAALLGNLTLLALSQQECELEPT  
SEMALQRFVREVIRHDAPIQNTRRFTATPIRHGDAEVPAGRAVLVLLAAA

NRDPAANPDPHMFRAADRTTPNVFTFSAGAHHCGETLAVTIVTTVVEQLL  
RVGFDPAKLSTRVTYRPSPNARIPVLT

>CYP107AX7 (2563518791) *Salinispora arenicola* CNY666

MTSQPAPVFDQLLLLRDPHRRYNALRDQAPVHHIRTPDGAPAWLVTRYDDV  
RAAFTDPRLSVDKRFSSTDGEHGSSLPELDAHLLNRDPPDHTRLRLRLAA  
AAFTPRRIADLRPAVKRIVSTLLDNLVGNDQAEFIGSLASPLPLQVMHEL  
LGLPTQTSVDFRTWTNTLLSADANQPAQSRSAMANMRHFLIEQVARKRAR  
PGDDLLTGLLAARADGDRLTDELVAMLFLLMFAGYDNTAALIGNVTHAL  
LTNAELPEAVRAGSLALDELVDGVLRWNPSPFLAVRRFAREFVTIAGQVI  
PAGDRIWLCLASANRDPAQFTEPDELGATGMRRPHLSFGHGIHYCLGVPL  
ARLQTTVAVTSLDRFPGIRLAVPAHDIRWRESFRLRGLVTLFVFL

>CYP107AW7 (2563518802) *Salinispora arenicola* CNY666

VETVTGTSTPPPVPIADPYPTLARIRGNGPVSILHSDEGIPMWVIARYR  
DVRAALADPRFGQDARRAQALADNRVAGVTLGGDIVHMLNSDPPDHTRLR  
RHVQGAFTARRVAAMRPLVERITTSLLDGIAGRRTTVDLVQDFAFPLPMLV  
ICELLGFPAEERNAYRSWSTAILTHDDDPAAAFATALREMTDYIAVQLRIR  
QTRPGDDLLTELLAARDAGQLTDDDIIGMVFLLLIGGHETTNNLLGTATL  
ALMRDPDQHRWLLANQHALPEAIDEFLRYESPAMATLRFTTTPVAVDDV  
VIPAGELVLVSLGGANRDPDRFPDADRLILDRDRTGHFAFGHGLHRCCLGA  
FLGKLEGEVALGALLRRHPRLALAAEVRQLRWRDTIMLRGLESPLVSLDG

>CYP107E38 (2563518888) *Salinispora arenicola* CNY666

VTIDQEIRKYPFRESPIGIDPTYELLRRTEPLARVQLPYGEVSWLATRY  
EDVKTVLTDPRFSRAAAQGKDQPRTRAEMTYEGIIIGLDPPDHTRLRLKLAG  
KALTARRVNARADAQRIANEYVDELIAGKSPGDLVELFALPYPVTVICE  
LLGVPFEDRAQFRIWTEGLTSTSEQLMVYAEQLFGYMGKLVAQRRAEPTD  
DLLGALVKARDEGDRLTEQELLSIAGVGLLLTGIVETVSTHIPPVYALLT  
HPELMAQLRADRSVPAAVEELLRMIPLNPAAMFPRYAVEDVTLSGITVR  
AGEPVLVSLPGANRDPEVFENPETIDLTRDPNPHVAFGHGPHHCLGAQLA  
RMELQVALHTVLDRFPDLRLADGDAGVSWKSGLLVRGPNRLVAV

>CYP105CP2 (2516037503) *Salinispora arenicola* CNH941

MTKSMPVQDLPAFPIPRECYPYRPSAQHVSLRSGGPMKVRLYNGRTAWLV  
TDSAHAVALSDYRRVSIKPYHGNYPLLNEEFKVVDSGYADVLFVGDPP  
EHTRQQRQMIMPSFTLRRTAVLRPDQIRIVDDKLDEMRRHGAPGDLVTEFA  
QPVPSPMVISFLLGVPWEDHEEFETPAHKLFPPELAEEATELGAYLERLI  
QKKEQPGGTGGTGLLDDLDLIRDLRAGALSRLDELVHIAMAMLVAGTDTT  
NVISLGTALALLDNPDQWAALRDNPDELIPGAVEEILRYTSLIEAFARVAV  
SDIELNGAVIKEGEGILISSAGVNFDPALAPDPGRFDIRRPFRPSFSFSH  
GIHRCPGDNLARLELEIAFRSLVTRMPNLRRTAKPIDQIPSNNDGTLQRL  
YELPVVW

>CYP105CN1 (2516037505) *Salinispora arenicola* CNH941

MAAPAPQATTSTTPHPPSYPLPRECYPYRPSAGTAHLRDAGPVSTVRLYDG  
RTAWLVGTGAEEARALLADSRVSNRADFPNYPVMDEHLSMRATREMAREE  
EGGFAAALFGMDPEHTRQRQLLPRFTVRQVAARRPAIQRMVDEHLDAM  
EANGSPADLVSAFATPVPTMVVCTHLGVYPYQDRTRFEPVAGLFEPRAD  
AAMAELTAYLHQLIETKQSEPGDGVIDHLIANHLRPGAIDRAELVAIASA  
ILVAGTVTTSSAIALGLTALLTAPGQYTALVDNPDLPVPGAVNEILRYLSL  
VEQLARVATEDIEIGGKLIRAGDGIIVSFAAGNLDPNVTTHPDRLDVALP  
PTNHAFSHGIIHCIGQNLALLELDIAFRALVSRFPTLRLAVPAEQLPY

FAGDVPRLACLPVTW

>CYP107FS2 (2516037506) *Salinispora arenicola* CNH941

MPVPQGEQNLTTTEVFADPKALIATLGSRQPLHRISLPDGMFAVLVTGNRE  
ARQALSDPRLVRSITAAAPELHKYHPLASDDYALSRHMLFADPPDHGRMR  
KLVSTAFTRRRVEQMRPRIQQITDDLIDVIAAKGEADLVETLALPLPIAV  
ISEMLGVFFADRSEFERHAEVLTGINASSGFDATIAAGRWFDEYLAGLVQ  
QRRREPQDDLISGMLAAQDKGDRITDVELRSNALLLSAGFETTVNLIAN  
GLLALLRHPEAMAAALRSEPNLMTTAVDELRLRYDSPVSCVTYHFAQEPVEI  
GGFEIRSGEHVVIAAAAAANHDPTVFADPSRLDLRREGSGQILSFSGIHF  
CLGAPLARLEGEIAFGTVLRRLAGRLAVPTDSLWVKASFVLRHRLERLPV  
TFTPDRDPNPIDSVHTV

>CYP125G6 (2516037545) *Salinispora arenicola* CNH941

VPTLLNEHVSYDGAATIAIVDSGATSWIRLAERVNRWVHLLRAHGLDTGD  
RLACVTGNRRTEFEVLLAALHTGVTVPVNVHLLTVTEIGHILSDSGSRVV  
ITEELHVKAFAAAADGMAGPVAGLVLGDRIEGFAAVEPLLAASPAEPE  
GQVCGATMLYTSGTTGRPKGVVNNLFVTGAPYARVGRLCDYARSVLGVPR  
RERMLLDGPPWHSSQLFFALLSLLQGSRLVIRPYFDPAAATLKTIDDHRT  
VTHLVPTQLVRLLRVDALTRQMFSGASLRRVWHGGGCPPEVKRSMIDWW  
GPVLVEYYGATEGGVVTLIDSAEWLARPGSVGRAVPPSEVVVVDDGGQPV  
AAGQTGQVFFRRRTGNRFHYHNAPEKTQAAYLAPDTFTYGEVGHVDEG  
LFLTGRAQDMIVSGGVNVYPAEVEAALLRHPVVRDAAVIGVADDEFGERV  
VGIVVPETAVDPDDLATHLDAHCRVSLAGFKVPRTYRVVESLPRDETGKL  
RKDALRSKFGWLSGAAMTVPRPATGQPTAHRPDIAHPTTYVSGVPHDEFA  
RRRRDEPVGWVAEPVLTRHTAAGRTATRGSGFWAVTRYEDVVAASRRVTD  
FSSAAKGAFLTDPRTPADLQQAQQLLVNMDDPHHARLRKLVTSTVFTPRAV  
RGLLASIDAHAALVAKVVAAGEFDVVTDLAAELPLLVLADLLGVPKQDR  
ALLYGWSNHLVGFDPDFGGGDI DAYRTAMAEAFQYALNLGVERRARPTD  
DLVSLLANAEVDGTRLTDREFCNFWLLL VVAGNETTRHLVAGTMQALTEH  
PGEARLVEGRVPTESAVEELLRWVTPIMQFRRTATRDTEIGGQAVTAGE  
KVVLYYTSANRDATVFAEPDRDLGRTPNRQLSFGIGPHYCLGAHLARAE  
LTALLRVMSPHLGLSLQLTGPVSRLASNFVNGVKAMPAVIGSR

>CYP154M15 (2516037570) *Salinispora arenicola* CNH941

MNDKCPFAALDVTGQDLHGEEARLREQGPAVLVELPGGVKAWSINRYEVI  
RELLMDRRVTKNARKHWPFIKGEIPPDWEMISWVAMDNMTAYGKDHVR  
LRKLVGRAFTQRRADALRPQVVALSTKLDDLGLATPPGEVVDLRERFAYP  
LPAMLVASLIGMSEAALAACSKVIDMMVHTNVSPEEAQAVALRGWRAAMAD  
LIESKRRTPGEDITDILIAAREEDGSRLSEAELADTIFAILGAGSETTIN  
FFDNAITALLSRPGQLQLLRTGAVTWDDVIDEVLRVESPLAHLPLRYAVE  
DIELDGVTIPQGDPILVNYAAAGRDPALHGGTADEFDLARGDKTHLSFGY  
GPHYCLGAGIARMVATIGLSMLFERFPDLSLAVPATELKRLPFTFIMNGHQ  
TLPVRLTAHAR

>CYP107FJ2 (2516037589) *Salinispora arenicola* CNH941

MSETLSTSVLLADAAEQRAWRAKLRGAGPVHRITTSQSGETGWLIVGHEEA  
RNALVDLRLQGRATVGHGRMPEDLERALNSHMLNVGPPDHTRLRLRLVS  
AAFTRRRIEQMRPIQELTDELDDGLAGADEADLVAGLALPLPMRVLVDL  
FGIPAEDCADFNWTKVLTSAGAVDLRLTTAAGEMVAYLRGLLDRKRQV  
PESDLSALVAVRDGADRLSDELTSVMVYLLLTAGYETTVNLIGNGLLNL  
LANPEQLVAFKADPDLLPQVVVEAMRFDSPVQIAVRHSTEPVEIAGQAIP  
SGALILVSLWANRDPDRFTEPEAFRVDRQDNPQLGFGYGFHHICIGAPLA



RMEGTIAIGTVIRRFAPALRLAHPAGSLTWRASVMHGLTALPVHLR

>CYP154M20 (2516037596) *Salinispora arenicola* CNH941

MERCPYVLDRAGDLHGEAKALRARGPVTLEVELHGGYTAWSVTSYEIAKQ  
LLVDPRIKNTKETWPEFREGKVPQDWELYTWVAMDNMQTRDGEEDRLR  
KLVAQAFTRQVAKVRPMIEDIVDRLLDDLEKVPAGEVVDIKGRYFYPLS  
TILVCDLLGIPEADRAEALHGTVVNARTTNSAESEANLHQWQSALSCLV  
ETKRREPGNDITTLIIKAREDEQAPLTDDEVIGSLHLLIGGGTETTSNVL  
CNTLIDLTHPDQMAMIRSGAVGWEEAWEVEVRKDGAVGSMFPRCANADI  
EIGGVTTAKGDLVLINAAAAGRDPERYGDTTAEFDITRADKTNLSFGYGR  
HRCGLPALATMEAMISLPALFERFPDLVLAVPREELKPQGTFFVNGYAEV  
PMLLRS

>CYP248A2 (2516037618) *Salinispora arenicola* CNH941

VLADAVTAFDPTAVDVRRDPYPSYHLLRHDPVHRGAHQVWYVSRAFADVR  
AVLGDERFARTGIRRFWTDLVGPGLLSQIVGDIILFQDEPDHGRLRGVVG  
PAFSPSALRRLEPTIEATVNDLLRPARALGAMDVVADLAYPLALRAVLEL  
LGLPAGDANAIGRWSRAVGRTLDRGATAEDMRRGHAAIAEFTDYVERALA  
ERREDGADLLALMLAAHRSQIMSRNEIVSTVVTFFIFTGHETVASQLGNGL  
LSLLDHPEQLELVRRQPHLVPPQAVEECLRFDPVQSNTRQLAADVELHGR  
RLRRDDVVVVLAGAANRDPGRYDRPDELDIRRDPVPSMSFGAGMRYCLGS  
YLARLQLRTALGAMVALPDLRLVCNPNELAYQPRTMFRGLTRLPVAFTPA  
G

>CYP105W2 (2516037625) *Salinispora arenicola* CNH941

MTGYQDRPTGDQPGAPVPSGSTDPGIGAFPLPRRCPPSPAEYARLRAEH  
PVVRLPMLGGDTAWVVSRAHADVRLSDPRMSADRRRPFGFPKFAPTTEGQ  
RQASFANFRPPLNWLDPPEHAICRRQIVDEFVSRRVRQSRALVERVVDTH  
LDALTAAPGADLVSTFAYPVSSQVICEVLGVYPYGEHEFFERRSTLMFRR  
STPADERARCAREIRDFLDVVVTDKHRPGDDLRSRLLYRQRAGGVDHE  
AVVSMAFVLLVAGHVTTSNMLALSVLALLTHPARLARLRAEPERFPAAVE  
ELLRYFTVVEAATARTATAEVTIGGVTTAAGEGVVALGQAANRDPVFEH  
PDEFDPDRDARAHLAFGHGRHICPGQHLARLEMEVALSRLFRRLPGLRLT  
MEVSDLPLKEDSNIFGLYALPVAW

>CYP154M13 (2516037638) *Salinispora arenicola* CNH941

MSTGRPVVLDPTGRDIHGEADHLRALGPATLVELPGGVLAWSINSYEVGK  
ALLSAPNVSKSARRHWPAYNGEIPPDWEMISWVAMDNISTTFGGDHRRRL  
RRLTAKAFGSRRAEQVRPMATHMVNTLLDRMADAADAGEVVDLKAAAFAYP  
LPGMLVAELIGMSEEARVAAAKVIDMMTATNITPEQAQGVLLGWRDAITD  
LIALKRAQPGDDITSDLIAARDEDGSLLTEQELVDTIFAILGAGSETTIN  
FFDNAITQLLTHPEQLELVKSGQVSWDDVIEEVLRLSPLASLPMRFAVE  
DIQLDGVTIHKGDPILINYAALGRDPALHGESAGVFDVTRQHKEHLSFGH  
GAHYCLGAGIARMVAKTGLSALFERFPRMTLAVSAKDLVPYPTFIMNGNR  
QLPVHLSGALTWREGEQSALGRA

>CYP154M21 (2516037639) *Salinispora arenicola* CNH941

MEKCPYVLDRAGSDIHKEASNLARGPVTLEVELHGGYTAWSVTSYEVAEQ  
LLMDPRIKNTKAHWPEFRDGNVPQDWELYTWVAMDNMQTRDGKEHDRLR  
KLVAFAFTGRQAVKSRPIIEEIVNRLDDLETAPRGQAVDIKARYFYPLS  
TILVCDLLGIAEEDRDVILHGNVNSKTTNTAESEANLHQWQTALGRLV

ETKRDPGDDLTTVIIKAGEDEQTPLTDDEVIGSLHLLIGGGTETTANVL  
CHTVVDMMLTHPDQLAMVRSGAVSWESAWEEEVKRDGAVGSMFRCATDDV  
EIGGVTTIAKGDVLVINYAAAGRDPERYGDAAAEFDITRADKANLSFGYGR  
HRCLGPALATMEAMVALPALFDRFPNLALAVPPNELKQPQGTFFNGYAEV  
PLLLRS

>CYP208A12 (2516037803) *Salinispora arenicola* CNH941

MTLDTITPRVPLGPPTAALRMLLVMKRDRLGMLTSAAARYGDASRLPVG  
HKALWFFNHPRYAKHVLADNSANYHKGIGLVHARRALGDGLLTSEGLWR  
KQRKVIQPAFQSRRIAQQAGMIAEEAFALVERLRARAGAGPVELTAEITG  
LTLGVLGRSLLDADLAGFDSIGDSFATVQDQAMFELETINAVPMWIPLPR  
QIRFRARRRKLQAVVDTLVDGRAGNLADRVDVLSRLILSARGEADPRVGR  
ERLRDELVTLLLAGHETTASTLGWTLSLIDRHPGVWERLHAEAVEVLGDR  
LPEYDDLRLRLRYTVMVVEEAMRLFPPVWLLPRRALAPDTIGEYRVPANAD  
VVISPYTLHRHPEFWNPFRFDPERFAPGQAADRPRYAYLPFGAGPRFCV  
GNNLGMMEAVFVIALLCRHLRLTGVPGRHLVPEPMLSLRIRGGGLPLVVRP  
VS

>CYP245A7 (2516038656) *Salinispora arenicola* CNH941

MPSATLPRFALTGWSRENIVNPYPVYQRYREVASVHRGEPGGDAPDTFYV  
FSYDEVVQVLSSNCFGRGRSLDAAKASVPVPAEQKALRAIVENWLVMFMDP  
PRHTELRSLNRSFSPIRVTELRPRIARIAQELLSRLSQQVDVDLVESFA  
APLPILVISSELLGPIEERRAWLRANALALQEASSSRAGRVDVGYARAEVA  
AQEFTEYFREQVRLRRGRAGGDLITILANAQQORGAPVSLDAIVGTCVHLL  
TAGHETTTNSLAKAVLALREHPAVLDELRGAEGLTTDAVEEFLRYDPPVQ  
AVTRWAHQDATLGGCDIPGRSRVVALLG SANRDPARFPSPDVLDVRRPAD  
RHLSFGLGIHYCLGATLARVELEIGLQALLDGVP T L G Y G T Q H V D Y A D D L V  
FHGSPSRLVLVNLGERCK

>CYP244A4 (2516038660) *Salinispora arenicola* CNH941

MSTTTNTELTEAPETNMPVDPLFDCMPDLIAAARVAPVVRIPYLG RHAW  
VVCDELVKQALTHPKMGKDIALVPEWMRQPGLMVTAQPDPEYARAMIMS  
DGENHARIRRIHAPVLSRPNTERWGERVADKVEGFLDELSQAGSGGSTEV  
NVVTNYTHKIPLAFISEMLGLPPEAEHRLRGITDIMLYSSDYAARREAIG  
GLFGAVEDWVRNPADLRDGVITGLLAASDGPDAAVTEGEVIVWTLGMIIT  
GYETTGLSLISTSLYEAIRRPPHERPKTDEDITAWIEETLRVHPPFPHTW  
RFPLEDIELGGYLIPKGAPVQVSIAAANRKPGEAGDSFDAERRGHGHLSE  
GLGMHYCIGAPLVRLEAQIAVRGFLRRFPQARLSAETAVQWESEWMIRRM  
SVLPAVLS

>CYP125A41 (2516038931) *Salinispora arenicola* CNH941

MTEPRIPAGFDFTDPEVLAHRVPREEFAELRR TAPVWWNAQPRGSAGFDD  
DGYWVVTRYADVMTVSRSDTYSTRENTAIARLRPD TTREDIEMQRVIML  
NVDPP EHTKLRAIVSRGFTPRAINALRGSLAERAHIVRDAAVRGVGD FV  
TDVACELPLQAI AELIGVPQHRRKVFDWSNQLIGYDDPAYGTDPLTASA  
ELLAYAMEMAEERQ RSPSDDLVTKL VNAQIDG EHLTTDEF GFFVMLLAVA  
GNETTRNAITHGMVAFLDNPEQWELFKAERP KSAVEEII RWATPVNVFQR  
TALVDTV LGGQAI SAGQRVALFYGSANFDEAVFEDPERFDITRSPNPHLG  
FGGSGAHFCLGANLARLEIELIFNSIADHLPDIRKVAAPQRLRSGWINGI  
RQMPVRYR

>CYP107Q4 (2516039332) *Salinispora arenicola* CNH941

MTTTAETSAETIDLFSPEVVADPFGWYARLREETGPTTGTNLNIGTMMGGP  
EMWLVTTRYEDVRQVLTDPFRFLTNPADSPLEDIRAGVFKRLDFPPDLIPW  
MANLLNVSDGEDHTRLRKLVSALTATHRIGKLRPRVEKITADLLDKLAED  
GKDGSPVDLVEEYCYPLPVTVICELVGIDEPDRPHWRAWGDSMATMNGER  
IPTTLVKCIELARELIAKRRAPQDDLVLTALVQAQAEQDQNRVSDDEIIGI  
LFSLVTAGHQTTTYLIGNSVILLLENPDQLARLKENPSMWPQAVRELQRL  
GPIQFAQPRFPSEDIELGGVTIPRGAPVAPLLLAANTDPRRFPDPNKLII  
DRLAVGSEHGLGFGKGIHRCLGQHLAYQEAEEVALQGLFTRFPDLSLAVPR  
EEIPWILRPGFTTRTRLPLKLV

>CYP105G5 (2516039333) *Salinispora arenicola* CNH941

LTIETTETPPADDSLAPLPRQFMQRDDPSKLPPALAALAEQSPVGRSTL  
PDGDPFWMVSGYDEARAVLSDPRFSSDRFRYHPRFKKLSGQLGERLRNDK  
ARAGSFINMDPPEHTRYRKLLTGQFTVRRMRQLTVRIEQIVTEQVDVMLA  
EGNSADLVSAFAVPVPSLMICELLGVRYEDRTEFQRRAGLLQTDLPKIQ  
AVENLEAQRAFMRQLVTDKRRTPADDMISGLVHHAGAEPPLTDELVGIA  
TLLLFAGLDTTASMLGLGMFMLLQRPEQMAVLRDDPSRIGDAVEELLRYL  
TVVSTGLFRFAKEDVVLGDEHIPAGSTVVVSLMAANRDGRHWPEPETLDV  
TRVRSSHLAFGHGVHQCLGQQALARIELTVGITELLRRLPNVRLAVPPADV  
PLRNDMITYGVHRLPILWDTF

>CYP1051A1 (2516039353) *Salinispora arenicola* CNH941

MATDAAITRARTVPAWKALPAAVRDTHRALVDVGNWSDGDVVRVSLGVSR  
PYLVTPNAHVQEVLHERAAIYPRGDDTALWRSVRKLVGDGILAEGDAAWAA  
SRRVLAPMFRPARINAMVDTMADAIAAGAVDDLHGAATAGTPIDVGRELSR  
IVCSAIMRVFFADRITVRDALRIMKAQETIVTAMAPRILAPLVPWWIPMP  
GDRRFRAAVRSIDILLPVLRQAQRQPDDGDDLLSRLVRARADDGQALSE  
KRMRDDLVSMVAVTTTETSTVVLTWLVPLLANHPDVANRLYDEIDRVVGGG  
PVRGDHLAELTYTRMVLDLLRLYPAGWILPRRAATTDVLGGVRINKGAT  
VILSPYVTQRMATAWWGPTAEAFDPERFAAGREAADGRHRYAYYFPGVGMH  
RCLGEHLFNLEAILIVATLLSRFRFALTDTSMPGVKVAASRTPARTVEMI  
LKPVAPVPAR

>CYP107AX13 (2516039766) *Salinispora arenicola* CNH941

VTSPPHVAFGHLLRDPHGYNALRGQAPVHHIRTPDGAPAWLVMRYDDV  
RAALTDPRLSVDKRFSDTDGEHGSSLPPELDAHLLNRDPPDHTRLRRLAA  
AAFTPRRVADQAPAVATIVDALLDGIADQDQAEILIGALASPLPLQVMHEL  
LGLPTQTSVDFRNWNTLLSADANQPAQSRSAMATMRFRFLMGQLARKRAQ  
PGDDLTLTGLLAARDDDDRFTDDELLAMVFLLMFAGYDNTAALIGNVTHAL  
LTDAGLHDAVRAGSVDLDSVVDEVLRWNPSFPLAVRRFAREPVTIAGHTI  
PAGDRVWLCCLASANRDPAQFTEPDELGITPARRPHLAFGHGHIHYCLGAPL  
ARLQTTVAVASLLDRYPGIRLAVPAHELRLWRESFRVRGLAALPVRL

>CYP1005A1 (2516040012) *Salinispora arenicola* CNH941

VSAVLFRSWTKTAGTRWPDVTRVADQSGTEHLVVTRHALVRQVLTQATY  
RPDNALAEAVTPVPVAALRVLAGHRFRLLPPTLANNGGVSHPAIRALVADAL  
HPTKVAAQRPWLTGLVADRVATIRTTLDSSGGPVDLYADLTADLPLLVLAR  
LVELPDAPVNAVKKQFARAALFLWAPLDADRQLALADEVGRFHQVLRIFA  
DTGGGLAAALRATGHSPDVLVGALFFLLVAGQETTSQFLTLLHRLSGEP  
TIRAALRAGSISVADVVEEGLRLEPPIVTVRRVAAVDSTLGGTTVAAGTS  
VLLWLARAGRDPVVAAPDEFPRPGQRGSRRHLAFGAGAHRCCLGDQLARME  
AAVVVEQATPLLDGVTVVRPPWYPDNLTFRMPDAFVVRR

>CYP105AB8 (2516040191) *Salinispora arenicola* CNH941

MTETASSRHTDTEFPVQRECPFAEPVEYEQIREQSSIAMVRLTGGGEAWW  
ISGHEQGRAVLADRRFSSDRKANFPFVSTDPAIRKRLHAQPLSLISMDG  
AEHTQARRALIGEFTVRRLAALRPRIQQIVDQCIDEMLTDDQHRADLVKT  
LSLPVPVSLVICELLGVFPYADHDFEQEHTATLVRRNTASEVRQHSIDELNA  
YLGALIDRKLASPDDDLGRQIARQHRDGTFRSSMVSLAFLLLVAGHET  
TANMISLGVVGLLQHPEQLAMIKDDPDKTPLAIEELLRFFTIVDSVTSRV  
ATEDVRFGDTTINAGDGVVVSGLSADWDPTVFADPDRLDLERGARHHLAF  
GFGPHQCLGQNLARLELQIVFDTLFRHRIPTLRLAAPLKDIPFKTDAAIYG  
ARELPVAW

>CYP105BL2 (2516040628) *Salinispora arenicola* CNH941

MSSHSAAAPDPETATPLHTLAPELAFFPQFERSAPFDPPQAYTELSGRCPV  
APVSMADGKPSWLITSFEGVRTTLSDPHFSSDMSHPGFPNRTGKPVDDL  
KDTLGAMDGERHRYRRLMTGELTVRRAKAMRPVITQITDEALDQLAAAG  
PGADLVKHVAFVVPVSRVACHLVGIPLSYELFTGMAATLMDSTSDDQFA  
ALQNMVSYFDTLVTDREHHDRDDLGHMVRRYLATGELTRDMLIRLAWTT  
MAAGQETTAHMIIGLVAALLRHPDQLELLRREPHLLPGAVDELMRYLPLI  
QFGIPRVAMDDVEVDGQTVTAGEGVVALPPLANRDPVFERPDELDVRRN  
ARQHLTFGYGPHQCPAHALARLELEVYGRLLERFPTLRLADSDADLKVQ  
DKDIMYRVSELAVTW

>CYP211B2 (2516040784) *Salinispora arenicola* CNH941

MDVSEAI AVLISPSGRLDPYPTYEQ LRAHG PVSQT TAGLFVVTGYAEADM  
VLRDPRFVVLDDDLRDDVFPHWQDSPAIXIARSMLRTNPPDHSRIRRLA  
AGAFTPRRVAAMREVVTQADELVDEMIQAGR DGARVDFMDMFAYPLPVA  
VICALLGVPAADRSRFRRWAGDLTGILEPEITPEELAGADAGADELRDYF  
TGLIEQRRRAPADDLTALVQAHDADGDRLSGEELLANLVVLLVAGFETT  
TNLLGNGLVLLTRPEAAAAALRDEPD LAPGHVDELLRYDSPVQLTTRTVR  
ESVSFAGTEL PAGSWLLVLLGAANRDPRRFPD PARFDPGRAQSQPLSFGA  
GPHYCLGAGLARLEAQVAFPLLLRRLPELALAGRPSRRTRLT LRGYETLP  
ITVGAVTADRGT PAGVAPGTP

>CYP163B16 (2516041149) *Salinispora arenicola* CNH941

VTAADPGRVSGSESQTPAHTVDLADPATFANRDLTGFWQQLRDEEPIHWN  
PPTSGRRGFVVVSRYADILDVYRDDVTFTSERGNVLVTLLAGGDAGAGRM  
LAVTDGPRHAELRKL LRLALGPRVLAPVCAAVRANTRQMVREAVTKGECD  
FASDIASRIPMTISNLLGVPDADRAFLSLTKTALSADDESISETESAM  
ARNEILLYFQDLMEFRRDHPGEDVVSMLVNSTIDGAPLSDDDIVLNCYSL  
IIGGDETSRLTMIDSVNTLAAHPKQWRRLKDGQCEIDKAVDEVLRWASPS  
MHFGRVAAKDTILRGVQIRADDIVTLWHASGNRDERVFHRPEVFDLGRTP  
NRHLSFGHGPHYCIGSYLAKVEISELLIALRDLTSGFETTGE PQIRSNL  
LTGFSTMPVRFPDRAGLARDALDG

>CYP211C1 (2516041261) *Salinispora arenicola* CNH941

VVDVEELLTRLYSAQGRQDPFPVYADLHAQGPIAALPPEPERRRVA AVAV  
GYDLVGAVLRDPEWSKAPPPGWTEQEILRTLQTSMMFINPPDHGRMRHVF  
AGTFTPRRLGALEPVVNRVADELDRMADAGAGGLDFVAEFAYPLPARVM  
AEFIGIPETELDWYRERVDVIDAFLDVAGKTPQRLAAANAAGAE LRAFYG  
ELLARRRRTPGEDLISGLVEAVDAGGVELTEDELVSNLIVLNFNASFVTTV

YMLSNGLPVLLAHPEVAAALATDPVLTAGAVDEILRLQAPVHLLARAAPR  
DTVLGGVPI PQGQNVLLLLIAAANRDP AHFPDPDRFDPWRS GPPSLAFGLG  
LHYCLGA AVSRLEGR LALPRLLSRFPRLRIMEQPVYSGSLFLRGIDKLSV  
SPGEGSTRE

>CYP107AY2 (2516041353) *Salinispora arenicola* CNH941

MTAEPTPI PRSGARLGQEYDQLRKTGDVHQVLLPDTSLAWLVTNPEVAAR  
ALADPRLALNRRNSRGGWSGFALPPALDANLLNLDAPDHTRLRRLVGPAPF  
SPQRVAALRPGIRRAEHLDDTLVATSGPTDLVTGYCNPLSVQVIADLMG  
VPEAGRTNLRATD TMLTSYPPDRDAIRQAVTELHG YVVDLIDIKQQQPG  
DDL LSALVTIEQDGDRLSRDELTS LAFLILFAGYENTANLIASAVLWLLD  
HGGLNVVPSSEAIEGTLRHEPPAPVAIRRFPTEDIIIGGV TIPAGDTVLL  
SIAAATRGADGNAARLAFNGPPLLPRCGPGPGRGRGGTHRAGPSATRSD  
ARRAPFFPGVASDVSHPRPRRTPGRLVAVRDDR MAGHYLGNGQREVADA  
R

>CYP166A4 (2516041620) *Salinispora arenicola* CNH941

MTDAISFELPWARTDKFDPPTVFDALREQRPLARMRYPDGHVGVIVSSYE  
LVREVLGDPRFSHSCAVGHFPVTHQGGV IPTHPIPGMFIHMDPPEHTRY  
RRLLTGEFTVRRSRLTGHVEGVATEQIEVMREHGAPADLVATFARPLVL  
RVLSGLVGLPYGERDRYLHAVTLLHDAEADPAEAAAAAYEQAGAYFDEVIE  
RRRRQPEDDLISTLVGDGELTGEELRNIVTLLLFAGYETTESALAVGMFA  
LLYHEDQLARLRADPTKIDAAIEELLRYLTVNQYHTYRTASEDIELHGEV  
INKGDSVTVSLPAANRDPARFACPAELDIERETSGHVAFGFGI HQCLGQN  
LARVELRAGLSALLRAFPNLR LPAVPADEVPLRLQGSVFAVKNLPVCW

>CYP105J3 (2516041670) *Salinispora arenicola* CNH941

MTDSVAFFPQGRVCPHQ PAPGYRPLAVQRPLAQVTLYDGRRVWAVTTRDLA  
RRLLVDPRISSDR TNPAWPAIVPIVAAAVNDAQQKVLKIATALVGTDGPE  
HKAQRKMLIPSF TFRMNALRPMIQEIVDQQ LDEMIKSGAPTDLIPAFAS  
AVPVTVLYRLMGIPDDDHGIF EKL SHQLLAGPNANEAYDQLMGYMSRLIA  
ERRRNPGEGLVDDL LAQHGANDDADHDELVSTLVVQVAGNHGTTGSMIAL  
GLFALLQHPEQLAELRADPSLMPTAVDELLRFLSVPDAVTRLAADDIEVE  
GTIIRKGDGVFFITSLINRDTDVHDAPNSLGWHHASAADHLTFGFGAHQC  
LGQSLARITMEIALGALIERLPSRL LPAVPAEEVPFLPAASLQVIAELPIT  
W

>CYP162P1 (2516041787) *Salinispora arenicola* CNH941

MGLPSEVDLAEPDLADPDLYAEGDPDAEWAWLRAHRPVYRNPAGATAAEFW  
ALTRYRDALQVYRDPSTFSSERGMVLGVDPVAGDPAAGRMLVVTDPPRHP  
KLRRIVSGIFVPRTMHRLEGRVRS LVDQLLHRVVDGAGRCDFANDVAARL  
PVAIIICELLGVPADEQDWMYHLTSTAFGGGDPAGSAEVS AVERAEAYGDI  
LLYYGELAAERRRRPGDDLVTLLVHADLDGEPLDVEDVLVNCTNLIIGGN  
ETTRHAASGGLLALAQRPELWRRLRETPTAVPTAVEEVL RWTTPGMHVLR  
TATRDTEIGGVPIRAGERVVVWNAANRDEDFADPQRFDIDRSPNRHIA  
FGQGGHHCLGAALARLELTILFEEMAKQVTNVRLTG PVRVRVSCVLRGIR  
ALPVELVT

>CYP211B11 (2524944033) *Salinispora pacifica* CNY239

MDASEAVALLTSPPGR LDPYPTYERLRAHG PVVSTAAGFFVVTGYTEADT  
VLRNPRFEVMDDEERDGVFFHWQDSPAMISISRSMIRANPPDHSRMRRLA

AGVFTPRRVAALREVVAQAQADGLVDEMIRAGRGGAAVDFMGSFAYPLPVT  
VICALLGVPTADWARFRHWASDLTGVLEPEITPQELAIADAGASELRDYF  
TELIAQRRRAPADDLTALVQAHDADGDRLSGEELLANLVLLLVAGFETT  
TNLLGNGLVVLTHPDSATALRGQPELAPGYVEEFLRYDSPVQLTSRTVR  
ESVSLAGVELPAGSWLLVLLGAANRDPARFTDPARFDPRAQSPPLSFGA  
GAHYCLGAGLARLEAQVAFPLLLRRLPELALAGEPTRRHRLTLRGYETLP  
VTVGAVPADPGTPAGVALGTP

>CYP107AX4 (2524944080) *Salinispora pacifica* CNY239

MTSQPAPVFDQLLLRDPHRRYNALRDEAPVHHIRTPDGAPAWLVTRYDDV  
RAAFTDPRLSVDKRLSSTDGEHGSSLPPELDAHLLNRDPPDHTRLRLRLAA  
AAFTPRRVADLRPAVERIVSTLLDGLVGHDAQAELIGSLASPLPLQVMQEL  
LGLPTQTSVDFRMWTNTLLSADANQPAQSRSAMANMRRFLVEQLAHKRAR  
PGDDLLTGLLAAREDDRLTDDELVAMLFLLMFAGYDNTAALIGNVVHAL  
LTNTELPAAVRTGSLALDELVDGVLRWNPSPFLAVRRFAREPITIAGQTI  
PAGDRIWLCLASANRDPAQFTAPDTLGTGMRRPHLSFGHGIHYCLGAPL  
ARLQTTVAVTILLDRFPGIRLAVPAHDIRWRESFRLRGLVALPVFL

>CYP107AW7 (2524944094) *Salinispora pacifica* CNY239

VETVTGTSTPPFPYIADPYPTLARIRANGPVSILHSDEGIPMWVIARYR  
DVRAALADPRFGQDARRAQALADNRVAGVTLGGDIVHMLNSDPPDHTRLR  
RHVQGAFTARRVAAMRPLVERITTSLLDGLTGRTTVDLVQDFAFPLPMLV  
ICELLGFPAEERNAYRSWSTAILTHDDDPAAFATALREMTDYIAVQLRIR  
QTRPGDDILTELLAARDAGQLTDDEIIGMVFLLLIGGHETTVNLLGTATL  
ALMRNPDQHRWLLANQHALPEAIDEFLRYESPVAMATLRFTTTPVAVDDV  
VIPAGELVLVSLGGANRDPDRFPDADRLILDRDGTGHLAFGHGLHRCLGA  
FLGKLEGEVALGALLRRHPRLALAAEVRQLRWRDTIMLRGLESPLVSLHG

>CYP125A65 (2524945172) *Salinispora pacifica* CNY239

MTEPRIPVGFDFTDPAVLERRVPREEFAELRRTAPVWWNVQPRGSAGFDD  
DGYWVVTRYADVMAVSRDSETYSTRENTAIAARFQPGTTQADREMQRVIMI  
NVDPPHEHTKLRAIVSRGFTPRAINALRGSLAERAERIVRDAAAVRGTGDFV  
TDVACELPLQAI AELIGVPQHRRKVFWDWSNQLIGYDDPAYGVDPMAAAA  
ELLAYAMEMANERQRNPSDDLVTKLVAQIDGEHLTDEFGFFVMLLAVA  
GNETTRNAITHGMLAFLEHPEQWELFKAERPRSAVEEIIRWATPVNVFQR  
TALVDTTLGGQAITAGQRVALFYGSANFDES VFEEPERFDITRSPNPHLG  
FGSGVHFCLGANLARLEIELIFNSIADHMPDIRKVADPQRLRSGWINGI  
REMPVRYR

>CYP161N4 (2524946563) *Salinispora pacifica* CNY239

VNTVAQLPFTQTHVLDVAPALRLLQSRGKVHRVRTPEGVPAWLVTGHAEV  
QQLLDDRLSRSDPGGRDGGTALLNKLLGPLADDPRLRSLLEPQFTPER  
LEPLRAVVEKLTEQHLDELAARTPPVDLRPALAMSLPILVLC EWLGVP AE  
DKGRFSVWTQDAAGVQDPERSQRLAELFGYCRQLVAAKRQDPGDDVISR  
LITTAGIGDTEVVALTALLLFGGYETTVARIGTGVL LLLANPDQWAAVRA  
DPALVPATVDELLRRSMPNPHNGGMPRFAVTGFEIDGAAIRAGDLVLLNI  
IAANHDETAFFDPDRLDITRPTAGSLAFGYGRHSCVGAPLARMVLRVALS  
RLITRFPDLRLAVGVDELKLRHETLVGGLVELPVWTWGPR

>CYP2054A3 (2524946568) *Salinispora pacifica* CNY239

MSISADSEQVQGRPFDPYGAHRDDPYTFLAGLGVFYAPLLDAWCVTRRED  
MVAVLRDDRSFSARDHNPRPAVALPDDVNQMFRTWRGAGAVAVGSLDPPA  
HAKIRDVLNIGFTPARVRAFEPTMRAVAADLADRIGDAPEFDFIADFAPV  
FALEVIGRRLLGVPDDYLDRCRTWSEQRIELMMAQGDADHDRLREFARGLM  
EFGEFARSLVRDRVADPRDDLISELLHDGKAGRTLTADEVAVQIPTLIFA  
GHMTCAEALGTIFYQQLRSPGGWARVVDRTIPVGDLVEEGLRFDSPLAGM  
YRTATRDVTVGGIRLTAGSRLLLLLYGAAGRDSRAHACPAAFRPGDGSSGH  
LAFGHGIIHFCLGAGFARAELRVAVEVLAARMFPLGLAPGRPPRFRPVFPL  
RALTEL RVTRSGGGSGP

>CYP107FH3 (2524946573) *Salinispora pacifica* CNY239

VPIELDEAFVQDPYAVYEKLRAEGPAHRVRMPPGVPLIGGLPVWLITGYD  
AVRAALADSRLSTD LHRIDGLFAQKDPDRSHRGGFSSALASHMMHTDPPD  
HTRLRKLVSKAFTTRAIEALRPRIQQTDELTAELAGHDTV DLLDAFAFP  
LPIRVICLLLGVPAEQENFRSWSRALVSGHSPEAAATAATEVAAYLGDL  
VERKRHATTDVLTALVAHDVDDRLTHTELVSTAYLLFIAGFETTLNAL  
GNGTLHLMLHRDQWTALRADRALLDNAVEEFRLRESPLKHATFRCATESL  
RIGDAEIIAAGDFVLLAIASANRDPRRFPDPHTLDVRRPAAGHLAFGHGIIH  
HCLGAPLARVEVRMAFDALLDAFPDMRLATAPAGLRWRNSTIIRGLDSLPL  
VHLNN

>CYP124M3 (2524946997) *Salinispora pacifica* CNY239

MTVPIELDAVDLSNDNDFWTKPLEYRHAVFNALRAQPLPHFASPEFGSAP  
RGRGYYALTRMDDVLAVSRNPSVFI SGKGNVAMEVPAEFLDQSLITMDNP  
RHARLRRIVSRGFTMKAVTALMDNASQMAKQIVDEVVERGECDAVVDISA  
KLPLGIIICNMGI PDSQQQFVFEQTNVMLGVQDPEYVGEQNDAMLAMSV  
SQELADLMHELATLRAKNPTDDLISKLLSAEVNGEALTPSEL AHFFILLT  
GAGTETTRNAISWGIQLLTQSPEQREAWLSIDIGVTPTAVEEIVRWSSPV  
ISQRRTVAEDAEPVKLAGQLLGP GDKVLMFYGAANRDPNYFVHPEGFDVR  
RSPNPHVGYGGPGPHFCLGAHLARLEISVMFRELLIRIPDIHATGEPARL  
KSPLINGIKRLPVAFTPGAR

>CYP208A22 (2524947018) *Salinispora pacifica* CNY239

MTVIADRGGRIPPGPPVTAGLRLLLLALGRDRLGMMTSAAA EYGDVARLPV  
GPKKLYFFNHDPDHAKHVLADNHANYQKGIGLVHARRALGDGLLTSEGE  
RKQRRVIQPAFQNRRLAQYAGAVGQEATRLVARLATRV DGPVVDVDEMT  
RLTLGLVLRGRTLLDAELTG FHHGVGESFAAVQDQAMFELETNTVPTWIP  
LRQRRFRRARQHLQEVVDVLA AERGQAVEGRDDVLSRLILSTRAEADPQLG  
RERLRDELVTLLLAGHETTASTLGWSLHLLDQHPELRERVRHEARTVLGD  
RVPAYEDLHQLRYTAMVVEEAIRLYPPVWILTRKARA EDEIGGYRVPAGA  
DILICPYTLHRHPRFWAEPERFDPERFDPSRTTDRPRYAYIPFGAGPRFC  
VGNNLGMLEATLVLA VLLRDLRLEGLPGRAVVPEPMLSRLVRGGLPMTVR  
RVD

>CYP244A10 (2524947222) *Salinispora pacifica* CNY239

MQDTAQANLAEAPEVRMPIELRPTDCLPELLAAARVAPVVRTPYLDQHAW  
VVC DRELVKQALTHPKLGKDV ALAPDWMRQPGQMVTAMPPEYARMVM  
SDGEHHARIRRIHAPVLSRPNTERWSERVAALVDGFLDNLDSADGTEVNLI  
TDYTHKIPLAFTAEMGLPPGAERRLHDITEVM LYSADYALRQQAVGELF  
EAVQEWVRDPAGLRDGVITGLLASADGPDATVTKGEAIVWTL SLIINGYE  
TTGSLISAALYEALRRPARERPHTDEAVA AWIEETLRVQPPVPHTTWRF  
A LADLDLGGYLI PRGAPVQISLAAANLDPDE DADSFDAQRRGRGHLSFGLG

AHYCIGAPLARVQTKIALRGFLRRFPQARLSLDTAPRWESEWMIRMSVL  
PVLLA

>CYP107AY9 (2524947243) *Salinispora pacifica* CNY239

MSQDQPTRAELAPIPRSGTRIGPEYDQLRKTDGVHQQVLLPDTSMWLVT  
PDLVSRALADPRLALNRKHSRGGWSGFALPPALDANLLNLDAPDHTRLRR  
LVGPAFSPQORVAALRPRIQRTAEELAETMVATGSPVDLVTGYCTPLSVQV  
IADLLGVDPDAGRTDLRAWTDMLTSYPPDRDAIRQAVVELHGYVNNLIEA  
KQQRPGDDLSSALVATEQEGDRLTRDELTSALFLILFAGYENTANLIAS  
VLRLLDHGSLRGVVRVSEAIEETLRLEPPAPAAIRRFPTTEMTIGGATIPA  
GDTVLLSIAAATRGADGNPARLAFGNGPHYCLGAALARVEAEEAITVLAR  
RLPGLALAVPGAPVRWRPTFRTHGPAELLVAV

>CYP105AB28 (2524947812) *Salinispora pacifica* CNY239

MTETASTTTPGISSTTTSGPASGEVTDAEFFPLERGCFFSTPTEYEQIREH  
SPLAKVRLTTGREAWWIAGHELGRAVLADRRFSSDRRRDNFFVSTDPE  
RKQLQDQPTSMIGMDGAHAQARRALMGEFTVRRMAGLRPRIQQIVDQHI  
DEMLSSDQRTADLVEALSPLVPSLVICELLGVYPADHDFQARSGLIRH  
TTPTEVRLRIQKELNTYLALIDRKVADPTDDLRSRQIAKHHAAGTFDRT  
SLVSMALLLIAGHETTANMISLGVVGLLQHPDQLAMIKEDPEKTAPAVE  
ELLRYFTIADTVTARVATEDVQLGGTTINAGDGVVISGLAADHDPTVFTD  
PDRDLERGARHHVAFGFGPHQCIGQTLARMELQIVFDTLFRRIPTLRLA  
APLDDIPFKSDAFVYGAERLPVAV

>CYP107E37 (2524948458) *Salinispora pacifica* CNY239

VTIDQEIREYPPFRESRGIGIDPTYELLRRTEPLARVQLPYGEVSWLVTRY  
EDVKTVLTDPRFSRAAAQGKDQPRTRAEMTYEGIIGLDPPDHTRLRLRLAG  
KALTARRVNAIRADAQRIANEYVDEMIAGKSPGDLVELFALPYPVTVICE  
LLGVFFEDRAQFRIWTEGLTSTSEQLMVYAEQLFDYMGKLVAQRRAEPTD  
DLLGALVKARDEGDRLTEQELLSIAGVGLLLTGVEVTVSTHINPFIYALLT  
HPELMAQLRADRSVLPAAVEELLRMIPLNPAAMFPRYAVEDVTLSGITVR  
AGQPVLVSLPGANRDPEVFENPETFDFTREQNPHVAFGHGPHHCLGAQLA  
RMELQVALHTVLDRFPDLRLADGDEGVSWKSGLLVRGPSRLLVGW

>CYP1005A6 (2524948593) *Salinispora pacifica* CNY239

VSAVLFRSWTKTAGTHWPAVTRVADQQGTEHLVVTEHALVRQVLTDQVTY  
RPDNALDAVTPIPVAAALRVLAGHRFRLPPTLANNGGVSHPAIRALVADAL  
HPAKVAAQRPWLTELVAERVAAIRATLDSGGSADLHAELSADLPLLVLAR  
LVELPDAPVSAVKQFARAALFLWAPLDADRQLALADEVGRFHQVLREFA  
DTGGGLAAALRATGHPPDVLVGALFFLLVAGQETTSQFLTLLHRLAGEP  
TVRAALRDGSVSVPNVVEEGLRLEPPIVWRRVAAVDSTLGGTAVPAGTS  
VLLWLRAGRDPAIVSAPDEFPRPGQQGSRRHLAFGAGAHRC LGDQLARME  
AAVVVEQVSPLLDGVTVVRAPWYPDNLTFRMPDAFVIRRGPAAGAAER

>CYP125A41 (2528437948) *Salinispora arenicola* CNR425

MTEPRIPAGFDFTDPEVLAHRVPREEFAELRRTPVWWNAQPRGSAGFDD  
DGYWVVTRYADVMTVSRSDTYSTRENTAIARLRPDTTREDIEMQRVIML  
NVDPPHETKLRAIVSRGFTPRAINALRGSLAERAHIVRDAAVRGVGFV  
TDVACELPLQAI AELIGVPQHRRKVFWDWSNQLIGYDDPAYGTDPLTASA  
ELLAYAMEMAERQSRPSDDLVTKLNVNAQIDGHELTDEFGFFVMLLAVA  
GNETTRNAITHGMVAFLDNPEQWELFKAERP KSAVEEIIIRWATPVNVFQR



TALVDTVLGQQAISAGQRVALFYGSANFDEAVFEDPERFDITRSPNPHLG  
FGGSGAHFCLGANLARLEIELIFNSIADHLPDIRKVAAPQRLRSGWINGI  
RQMPVRYR

>CYP211C1 (2528438096) *Salinispora arenicola* CNR425

VVDVEELLTRYSAQGRQDPFFVYADLHAQGPIAALPPEPERRRVA AVAV  
GYDLVGAVLRDPEWSKAPPPGWTEQEILRTLQTSMMFINPPDHGRMRHVF  
AGTFTPRRLGALEPVVNRVADELDRMADAGAGGLDFVAEFAYPLPARVM  
AEFIGIPETELDWYRERVVIDAFLDVAGKTPQRLAAANAAGAE LRAFYG  
ELLARRRTPGEDLISGLVEAVDAGGVELTEDELVSNLIVLFNASFVTTV  
YMLSNGLPVLLAHPEVAAALATDPVLTAGAVDEILRLQAPVHLLARAA PR  
DTVLGGVPI PQGQNVLLLLIAAANRDP AHFPDPDRFDPWRSGPPSLAFGLG  
LHYCLGAAVSRLEGRALPRLLSRFPRLRIMEQPVYSGSLFLRGIDKLSV  
SPGEGSTRE

>CYP166A4 (2528439213) *Salinispora arenicola* CNR425

MTDAISFELPWARTDKFDPPAVFDALREQRPLARMRYPDGHVGWIVSSYE  
LVREVLGDPRFSHSCAVGHFPVTHQGQVIPTHPQIPGMFIHMDPPEHTRY  
RRLLTGEFTVRRSRLTGHEGVATEQIEVMREHGAPADLVATFARPLVL  
RVLSGLVGLPYGERDRYLHAVTLLHDAEADPAEAAAAAYEQAGAYFDEVIE  
RRRRQPEDDLISTLVGDGELTGEELRNIVTLLLFAGYETTESALAVGMFA  
LLHHEDQLARLRADPTKIDAAIEELLRYLTVNQYHTYRTASEDIELHGEV  
INKGDSVTVSLPAANRDPARFACPAELDIDRETSGHVAFGFGI HQCLGQN  
LARVELRAGLSALLRAFPNRLRLAVPADEVPLRLQGSVFAVKNLPVCW

>CYP245A7 (2528439513) *Salinispora arenicola* CNR425

MPSATLPRFALTGWSRENIVNPYPVYQRYREVASVHRGESGGDAPDTFYV  
FSYDEVVQVLSSNCFGRGRSLDAAKASVPVPAEQKALRAIVENWLVFMDP  
PRHTELRSLLNRSFSPRIVTEL RPRIARIAQELLSRLGQQVDVDLVESFA  
APLPILVISELLGIPEERRAWLRANALALQEASSSRAGRVDVGYARAEVA  
AQEFTEYFREQVRLRRGRAGGDLITILANAQERGAPVSLDAIVGTCVHLL  
TAGHETTTNSLAKAVLALREHPAVLDELRGAEGLTTDAVEEFLRYDPPVQ  
AVTRWAHQDTTLGGCDIPGRSRVVALLG SANRDPARFPSPDVLDVRRPAD  
RHLSFGLGIHYCLGATLARAEEIIGLQALLDGVP TLYGTQHVDYADDLV  
FHGPSRLVLVNLGERCT

>CYP244A4 (2528439517) *Salinispora arenicola* CNR425

MSTTTNTELTEAPETNMPVDPGLFDCMPDLIAAARVAPVVRI PYLGRHAW  
VVCDRELVKQALTHPKMGKDIALVPEWMRQPGLMVTAQPDPEYARAMIMS  
DGENHARIRRIHAPVLSRNTERWGERVADKVEGF LDELSQAGSGGSTEV  
NVVTNYTHKIPLAFISEMLGLPPEAEHRLRGITDIMLYSSDYAARREAIG  
GLFGAVEDWVRNPADLRDGVITGLLAASDGPDAAVTEGEVIVWTLGMIIT  
GYETTGSLLISTSLYEAIRPPHERPKTDEDITAWIEETLRVHPPFPHTW  
RFPLEDIELGGYLIPKGAPVQVSIAAANRKPGE GADSFDAERRGHGHL SF  
GLGMHYCIGAPLVRLEAQIAVRGFLRRFPQARLSAETAVQWESEWMIRRM  
SVLPAVLS

>CYP105BL2 (2528439764) *Salinispora arenicola* CNR425

MSSQSAAAPDPETATPLHTLAPELTFPQFERPTFPDPPQAYTELSGRCPV  
APVSMADGKPSWLITSFEGVRTTSLSDPRFSSDMSHPGFPNRTGKPVDDL

KDTLGAMDGERHRYRRMLTGELTVRRAKAMRPVITQITDEALDQLAAAG  
PGADLVKHVAFVVPSPRVACHLVGIPLSDYELFTGMAATLMDSTSSDDQFA  
ALQNMVSYFDTLVTDREHHDRDDLLGHMVRRYLATGELTRDMLIRLAWTT  
MAAGQETTAHMI GLGVAALLRHPDQLELLRREPHLLPGAVDELMRYLPLI  
QFGIPRVAMDDVEVDGQTVTAGEGVVALPPLANRDPVFERPDELDVRRN  
ARQHLTFGYGPHQCPAHALARLELEVYGRLLERFPTLRLADSDADLKVQ  
DKDIMYRVSELAVTW

>CYP105CH1 (2528439840) *Salinispora arenicola* CNR425

VSSLPLPTYPKLRDPADPLLPAPAEYLAIQSEKPIAKVLLPSGRPTWLITG  
HALARQVLTEPCVSVDRRHNPFPYPVPNPDAVVAQVARWTYILLGDDPPL  
HTERRRLLI SEFTVRQAQAMRPRIQQQLVDFHLEQLIAAGPGADFSKHFAM  
QVPSAVICEMLGVPFADHDYFQERTALQLRRDVPVAAQKQAIDELLAYFE  
QLIQEKSSHPGDDVLSRLIVSNRETEAFDHEALVALGLLLLVGGHETTAN  
TLTLATATMLERPEIAEQLRTPSLMPSAVEEFLRYFSVAVAVSRIATAD  
LQVGGQLVRAGESMLLVNLT IARDGTVFPEPHRLDIRRNARNHLAFSHGI  
HQCMGQNLARVEMQIALD TVLRRLPGLHLVTPFEELPFKYRHLVWGIEEL  
RVAW

>CYP154M5 (2528439983) *Salinispora arenicola* CNR425

VEQSCPYKLDVTGRDVHAEGEAI RARGPVAQVELPGGVQGWSVTGYQAAR  
QVLADPRFAKDPKKWPAYTSGAIPPNWPLIGWLLMDNM TNDGADHQRLR  
KLVSHGFTPRQVERTRPLIVKIVNDLLDGLSSAGPDEVVDLKGRFATPLP  
ARVICDMFGVPEALRASVLRGAQVNVTS SSGEEAEANVEQWHRELELV  
EAKREKPDDEMASLLIAAKEEDGSTLTQEEVVGTLHMLGAGSETLMNAL  
SYAVLGMLS NPGQYEMVRNGTSSWDDVIEETLRAQAPVAQLPLRYATEDV  
AVGGAVIKAGDPVLMGFTAIGRDP AVHGETAGDYDITREDKTHLSFGHGV  
HFCLGAPLARLELKIALPALFERFPNM TLAVRPDQLEPQGT FIMNGHREL  
PVRLGQPATVLA

>CYP105CT1 (2528440000) *Salinispora arenicola* CNR425

MNSPNHMPADRSLTAPTSGCPMALSRGRVGLDVADEISELRDGGRLGRIT  
TAFGQEATLITRYDEVRAQMADSVVFN VAGVPSPPALVDGGFDTESVRRR  
RTVGNLIMLDPPEHTRLRRMVAAWFTTRRVERLRPRVVEI IDAALDEMER  
SGPPVDLVAMFAKTVPITVICELIGVPEELRERYRRRAERAVSASAVSTP  
LDELRLREAGWVSRELIEYHRENPSDDIIGMLLREHGTD SHDDGITDDE  
LVGLANALLIAGHETTTQMLSMGTLALLRHPDQLALLRDDPSIVAGAVEE  
LLRYVGVLHGGFVRVATRDTRLGGHRIHAGELVVPALTAANRDPRL LTDG  
DRLDITRPPTSHVAFGHGVHFCIGAPLARMELREAFPALRRFPGLRLAV  
PDSELEFTQGT TVYSLRGLPVTW

>CYP107AY2 (2528440023) *Salinispora arenicola* CNR425

MTAEPTPIPRSGARLGQEYDQLRKTGDVHQVLLPDASLAWLV TNPEVAAR  
ALADPRLALNRRNSRGGWSGFALPPALDANLLNLDAPDHTRLRLRVGPAF  
SPQ RVAALRPGIRRAAEHLLDTLVATSGPTDLVTGYCNPLSVQVIADLMG  
VPEAGRTNLRATDTMLTSYPPDRDAIRRAVTELHG YVVDLIDIKQQQPG  
DDLSTLVTIEQDGDRLSRDELTS LAFLILFAGYENTANLIASAVLWLLD  
HGGLNVVPISEAIEGTLRHEPPAPVAIRRFPTEDIIIGGV TIPAGDTVLL  
SVAAATRGADGNAARLAFNGPHYCLGAALARVEAE EALTVLARRLPGLT  
LAVPPSQVRWRPTFRTHGPAELLVGW

>CYP105CP2 (2528440160) *Salinispora arenicola* CNR425

MTKSMPVQDLPAFPIPRECPYRPSAQHVSLRSGGPMKVRLYNGRTAWLV  
TDSA HARAVLS DYRRVSIKPYHGNYPLLN EEF EKVVDSGYADVLF GVDPP  
EHTRQRQMIMPSFTLRR TAVLRPDIQRIVDDKLDEM MRHGAPGDLVTEFA  
QPVP SMVMSFLLGVPWEDHEEFETPA HKLFVPELAE EATTEL GAYLERLI  
QKKEQPGGTPGGTGLLDDLIRDHLRAGALS RDELVHIAMAMLVAGTD TTT  
NVISLGT LALLDNPDQWAALRDN PDELIPGAVEEILRYTSLIEAFARVAV  
SDIELNGAVIKEGEGILISSAGVNFDPALAPDPGRFDIRRP RPSPFSFSH  
GIHRC PGDNLARLELEIAFRSLVTRMPNLRTAKPIDQIPSNNDGTLQRL  
YELPVVW

>CYP105CN1 (2528440162) *Salinispora arenicola* CNR425

MAAPAPQATQSTTPHPPSYPLPRECPYRPSAGTARLRDAGPVSTVRLYDG  
RTAWLV TGAAEARALLADSRVSNRADFPNYPVM DERHLSMRATREMAREE  
EGGFAAALFGMDPPEHTRQRQLLLPRFTVRQVAARRPAIQ RIVDEHLDAM  
EANGSPADLVSAFATPVPTMVVCTHLGVPYQDRTRFEP AVAGLFEPDRAD  
AAMAE LTAYLHQ LIETKQSEPGDGVIDHLIANHLRPGAIDRAELVAIASA  
ILVAGTVTTSSAIALGT LALLTAPGQYAALVDNPD LVP GAVNEILRYLSL  
VEQLARVATEDIEIGGKLIRAGDGIIVSFAAGNLDPNV TTHPDRLDVALP  
PTNHLAFSHGIIHHCIGQNLALLELDIAFRALVSRFPTLRLAVPAEQ LPTY  
FAGDVPRLACL PVTW

>CYP107FS2 (2528440163) *Salinispora arenicola* CNR425

MPVPQGEQNLTTEVFADPKALFATLGS RQPLHRISLPDGM PAVLV TGNRE  
ARQALSDPRLVRSITAAAPELHKYHPLASDDYALSRHMLFADPPDHGRMR  
KLVSTAFTRRRVEQMRPRIQQITDDLIDVIAAKGEADLVETLALPLPIAV  
ISEMLGVPFADRSEFERHA EVL TGINASSGFD AIIAAGRWFDEYLAELVQ  
QRRREPQDDLISGMLAAQDKGDR L TDVELRSNALLLSAGFETT VNLVAN  
GLLALLRHPEAMAALRSEPNLMTTAVDELLRYDSPVSCV TYHFAQEPVEI  
GGFEIRSGEHVVIAAAAANHDPTVFADPSRLDLRREGSGQILSF SHGIHF  
CLGAPLARLEGEIAFGTVLRRLAGLRLAVPTDSL VWKASFVLHRLERLPV  
TFTPD RAPNPIDSVHTV

>CYP105AB8 (2528440410) *Salinispora arenicola* CNR425

MTETASSRLTDTEFPVQRECPFAEPVEYEQIRERSSIAMVRLTGGGEAWW  
ISGHEQGRAVLADRRFSSDRKANFPFVSTDP AVRKRLHAQPLSLISMDG  
AEHTQARRALIGEFTVRRLAALRPRIQQIVDQC IDEMLT TDQHRADLVKT  
LSLPVPSLVICELLGVPPYADHDFEQEHTATLVRRNTASEVRQHS IDELNA  
YLGALIDRKLASPDDDLGRQIARQHRDGT FDRSSMVSLAFLLLVAGHET  
TANMISLGVVGLLQHPEQLAMIKDDPKTPLAIEELLRFF TIVDSVTSRV  
ATEDVRFGDTTINAGDGVVVSGLSADWDPTVFADPDRLDLERGARHHLAF  
GFGPHQCLGQNLARLELQIVFDTLFHRIPTLRLAAPL DKIPFKTDAAIYG  
ARELPVAV

>CYP208A12 (2528440769) *Salinispora arenicola* CNR425

MTLDTITPRVPLGPRTAALRMLLV MKRDRLGMLTSAAARYGDASRLPVG  
HKALWFFNHPRYAKHVLADNSANYHKGIGLVHARRALGDGLLTSEGDLWR  
KQRKVIQPAFQSRRIAQQAGMIAEEAFALVERLRARAGAGPVELTAE LTG  
LTLGVLGRSLLDADLAGFDSIGDSFATVQDQAMFELET LNAVPMWIPLPR  
QIRFRARRRKLQAVVDTLVDGRAGNLADRVDVLSRLILSARGEADPRVGR  
ERLRDELVTLLLAGHETTASTLGWTL SLIDRHPGVWERLHAEAVEVLGDR  
LPEYDDLRLRLRYTVMVVEEAMRLFPPVWLLPRRALAPDTIGEYRV PANAD  
VVISPYTLHRHPEFWPNPERFDPERFAPGQAADRPRYAYLPFGAGPRFCV

GNNLGMMEAVFVIALLCRHLRLTGVPGYRLVPEPMLSLRIRGGGLPLVVRP  
VS

>CYP211B2 (2528441210) *Salinispora arenicola* CNR425

MDVSEAI AVLISPSGR LDPYPT YQLRAHG PVSRTTAG LFVVTGYAEADM  
VLRDPRFVVLDDDLRDDVFPHWQDSPAIKSIARSMRLTNPPDHSRIRRLA  
AGAFTPRRVAAMREVVT AQADELVD EMIRAGRDGARVDFMDMFAYPLPVA  
VICALLGVPAADRSRFRRWAGDLTGILEPEITPEELAGADAGADELRDYF  
TGLIEQRRRAPADDLT TTA LVQAHDADGDRLSGEELLANLVVLLVAGFETT  
TNLLGNGLVVLLTRPEAAALRDEPD LAPGYVDELLRYDSPVQLTTRTVR  
ESVSFAGTELPA DSWLLVLLGAANRDP RRFDPARFDPGRAQSQPLSFGA  
GPHYCLGAGLARLEAQVAFPLLLRRLPELALAGRPSRRTRLTLRGYETLP  
ITVGAVTADRGTPAGVAPGTP

>CYP105W2 (2528441323) *Salinispora arenicola* CNR425

MTGYQDRPTGDQPGAPVPSGSTDPGIGAFPLPRRCPFSPPAEYARLRAEH  
PVVRLPMLGGDTAWVVS RHADVRQVLS DPERMSADRRRPGFPKFAPTTEGQ  
RQASFANFRPPLNWLDPPEHAICRRQIVDEF SVRRVRQSRALVERVVDTH  
LDALTAAPGADLVSTFAYPVPSQVICEVLGV PYGEHEFFERRSTLMFRR  
STPADERAR CAREIRDFLDMVVTDKERRPGDDVLSRLLYRQRSAGGMDHE  
AVVSMAFVLLVAGHVTTSNM LALS V LALLTHPARLARLRAE PERFPAAVE  
ELLRYFTVVEAATARTTTAEVTIGGV TIAAGEGVVALGQAANRDP RVFEH  
PDEFDPDRDARAHLAFGHGRHICPGQHLARLEMEVALSRLFRRLPGLKLT  
MEVSDLPLKEDSNIFGLYALPVAW

>CYP248A2 (2528441331) *Salinispora arenicola* CNR425

VLADAVTAFDPTAVDVRRDPYPSYHWWLLRHDPVHRGAHQVWYVS RFADVR  
AVLGDERFARTGIRRFWTDLVGPGLLSQIVGDIILFQDEPDHGRLRGVVG  
PAFSPSALRRLEPTIEATVNDLLRPARALGAMDVVADLAYPLALRAVLEL  
LGLPAGDANAVGRWSRAVGRTLDRGATAEDMRRGHAAIAEFADYVERALA  
ERREDGADLLALMLAAHRSQ LMSRNEIVSTVVT FIFTGHETVASQLGNGL  
LSLLDHPEQMELMRQP HLPVQAVEECLRFDP AVQSNT RQLAADVELHGR  
RLRRDDVVVVLAGAANRDPGRYDRPDELDIRRDPVPSMSFGAGMRYCLGS  
YLARLQLRTALGAMVALPDLRLVCSPNELAYQPRTMFRGLTRLPVAFTPA  
G

>CYP1051A1 (2528441531) *Salinispora arenicola* CNR425

MATDAAITRARTVPAWKALPAAVRDTHRAFVDVGNWSDGDVVRVSLGVSR  
PYLVTNPAHVQEVLHERAAIYPRGDDTALWRSVRKLVGDGILAEGDAWAA  
SRRVLAPMFRPARINAMVD TMADAIAGAIDDLHGAATAGTPIDVGRELSR  
IVCSAIMRVFFADRITVRDALRIMKAQETIVTAMAPRILAPLPWWIPMP  
GDRRFRAAVRSID DILLPVL RQAQRQPDDGDDL SRLV HARADDGRALSE  
KMRDDLVSMAVTTETSTVVL TWLWPLL ANHPDVANRLYDEIDRVVGGG  
PVRGDHLAELTYTRMVDEL LRLYPAGWILPRRAATDVLGGVRINKGAT  
VILSPYVTQRM TAWWGPTAEAFDPERFAAGREAADGRHRYAYYPFGVGMH  
RCLGEHLFNLEAILIVATLLSRFRFALTDTSMPGVKVAAS TRPARTVEMI  
LKPVAPVPA

>CYP105G5 (2528441556) *Salinispora arenicola* CNR425

LTIETTETTPADD SLRAPLP RQFMQRDDPSKLPPALAAAEQSPVGRSTL  
PDGDPFWMVSGYDEARAVLS DPRFSSDRFRYHPRFKKLSGQLGERLRNDK

ARAGSFINMDPPEHTRYRKLLTGQFTVRRMRQLTVRIEQIVTEQVDVMLA  
EGNSADLVSAFAVPVPSLMICELLGVRYEDRTEFQRRRAAGLLQTDLPKQ  
AVENLEAQRAFMQRLVTDKRRTPADDMISGLVHHAGAEPPLTDDELVGIA  
TLLLFAGLDTTASMLGLGMFMLLQRPEQMAVLRDDPSRIGDAVEELLRYL  
TVVSTGLFRFAKEDVVLGDEHIPAGSTVVVSLMAANRDGRHWPEPETLDV  
TRVRSSHLAFGHGVHQCLGQQLARIELTVGITELLRRLPNVRLAVPPADV  
PLRNDMITYGVHRLPILWDTF

>CYP107Q4 (2528441557) *Salinispora arenicola* CNR425

MTTTAETS AETIDLFSPEVVADPFGWYARLREETGPTTGTNLNIGTMMGGP  
EMWLVTTRYEDVRQVLTDPRLTNPPADSPLEDIRAGVFKRLDFPPDLIPW  
MANLLNVSDGEDHTRLRLKLVSYALTAHRIGKLRPRVEKITADLLDKLAED  
GKDGSPVDLVEEYCYPLPVTVICELVGIDEPRPHWRAWGDSMATMNGER  
IPTTLVKCIELARELIAKRRAEPQDDLVTALVQAQAEQNRVSDDEIIGI  
LFSLVTAGHQTTTYLIGNSVILLLENPDQLARLKENPSMWPQAVRELQRL  
GPIQFAQPRFPSEDIELGGVTIPRGAPVAPLLLAANTDPRRFPDPNKLI  
DRLAIGSEHGLGFGKGIHRCLGQHLYAQEAVALQGLFTRFPDLSLAVPR  
EEIPWILRPGFTTRTTLPLKLV

>CYP105J3 (2528441760) *Salinispora arenicola* CNR425

MTDSVAFFPQGRVCPHQPAPGYRPLAVQRPLAQVTLYDGRRVWAVTTRDLA  
RRLLVDPRISSDRTPAWPAIVPIVAAAVNDAQQKVLKIATALVGTGPE  
HKAQRKMLIPSFTRRMNALRPMIQEIVDQQLEMIKSGAPTDLIPAFAS  
AVPVTVLYRLMGIPDDDHGIFEKLSHQLLAGPNANEAYDQLMGYMSRLIA  
ERRRNPGEGVLDDLLAQHGANDDADHDELVSTLVVQVAGNHGTTGSMIAL  
GLFALLQHPEQLAELRADPSLMPTAVDELRLFLSVPDAVTRLAADDIEVE  
GTIIRKGDGVFFITSLINRDTDVHDAPNSLGWHHASAADHLTFGFGAHQC  
LGQSLARITMEIALGALIDRLPSRLAVPAEEVPFLPAASLQVIAELPIT  
W

>CYP107EU1 (2528442284) *Salinispora arenicola* CNR425

VTIGQTLPLVYSPEFTRDPYAIFARLREQAPVCRVTTHRGMSAWMVTRH  
ADVRALLADNRLAKDGNRIGELMPRHSTLTGAATGFPPGLTTNMVNSDPP  
DHTRLRHLVGREFTGHRVEGLRPRIEEIVDDLLDGVAACGDEADLAETLA  
RRLPIAVIGELLGVPEADRAEFFRWADTLYGGTASPEALGQAYNAIVDYL  
GRLCDAKRDPADDLLTALVQVSADEDRLSREELVSMALLLVAGHETTS  
KQISNGVLALLLNPEQLKLLKAQPARTAGAVEELLRFEGPSLSASLRFTT  
EPVEVAGVVIPEGEFVLLSLASGNRDPEKFPDPDRLDITRSTQGNLAMGH  
GIHHCVGAAALARLELEIVLSRLVARFPQMQLAVEADDLEWLNVNSFFRAPL  
HLPVSLRR

>CYP113S1 (2528442289) *Salinispora arenicola* CNR425

MDLRQSGMGTA PAYSLDGGRS LHRWLRDMREHHPVHRELLTRVWTLRYR  
DITQATADPAIFSELWRYLPGDRGDDALTAGNLAMDP PRHRLVRDLVS  
RSFTARAVGALRPRIAAIAAELIGAVADRGEMDVVADLS DPLPVLVIGEL  
LGLPMADRELLSDWARRLLSFDKGDLTDEVVRKRVADTQQELLDYLRVHC  
RRRTNPQDDLSRLIRA EVDGQRLTEDEVVN FANLLLLAGHVTTTLLLA  
NIVLTLDEHPAVAAEARADRG LIPGLIEETLRYRPVIVSNMRVTTRAVTV  
GTEQLPAGQLVLSLSFISGNRDEQYFTDPDRFDIHRDARKHLGFGHGIHYC  
LGAPLARLELGIALDAMFDRFSRIEVTGVPVDYYDTPGVAGPRSLRIA FR  
HH

>CYP107HF1 (2528442292) *Salinispora arenicola* CNR425

MYGDTEESAGVHSANNVTPLISTDPHAAYEHLREQAPACPIRSIEGSLMW  
IVARHDGVRSVLGDARFANNPASVPGGKAPQLQANAMRRLGLDEELIPYL  
ADTL LDSGKDHNRRLRRLVTPAFSARKVKALGPRIERLTDDLIDALPQHA  
GGGVTDLLEHFAYPLPINVIGELVGVPAADLPAWLRWTHDLSFNQQALGQ  
TLRPLVDYTYDLVRHRYDEPGEDLISELIQARDADGDRLSERELVTMVLS  
LVIAGHDTTANFIANSIWALLTHPEQLALLRADPGLMPQAVQELLRWCGP  
VLVSRMRYATEDVDLGGWTFQTGDAVTVALSGGNHDPRRFTDPGRDLITR  
QHDTRGEVHLSFGAGPHYCLGAALARHEAEIALSRMLARHPDLALAVPAE  
QLQWHAVSGMRKLATLPVRL

>CYP162A6 (2528442296) *Salinispora arenicola* CNR425

MPHGEP TLTLYANELCDPELYRQGNPEDLWRRMHAAAPVHEGIFEGRRFH  
AVISHALISRMLKDPKGFSSERGMRLDQNPAAATSLAAGKMLIITDPPRHG  
KIRRIVNSVFTPRMVARLEENMRVTAAGIVDQAIEEGECDFTDVAARLPL  
SAICDMLGVPPEDWDFMLDRTMVAFGSGEDELAMAEAHADILSYEDLI  
RRRRREPREDVV TALVNGVVDGTKLTDEEIFLNC DGLISGGNETTRHATI  
GGFLALLDNPEQWETLRDDPGLLP GAVQEILRYTSPAMHVLR TAVAPTRI  
GEYALNPGDPVALWLSAGNRDPQVFADPDRFDITRSPNPHLTFSTGAHYC  
LGSALATSELTVLFDRLRLRRVDSAELTGPPRRTRSI LIWGYDSVPVRLTA  
GSER

>CYP1005A1 (2528442475) *Salinispora arenicola* CNR425

VSAVLF RSWTKTAGTRWPDVTRVADQSGTEHLVVTRHALVRQVLT DQATY  
RPD NALEAVTPVPVAALRVLAGHRFRLPPTLANNGGASHPAIRALVADAL  
HPTKVAAQR PWTGLVADRVASIRTTLD SGGPVDLYADLTADLPLLVLAR  
LVELPDAPVNAV KQFARAAL EFWAPLDADRQLALADEVGRFHQVLR EFA  
DTGGGLAAALRATGHSPDVLVGALFFLLVAGQETTSQFL TLLHRLSGEP  
TIRAALRAGSSSVADVVEEGLRLEPPIV TWRRVAAVDSTLGGTTVAAGTS  
VLLW LARAGRDP AVVAAPDEF RFGQ RGSRRHLAFGAGAHRC LGDQLARME  
AAVVVEQATPLLDGVT VVRPPWYPDNL TFRMPDAFVVR

>CYP1198B1 (2528442535) *Salinispora arenicola* CNR425

MSGELTDQRTAPGAGGNPLRSLMDHGIRANPYPLFGELREAGPTAVEDGS  
VVLFG EYEHCSQILRHRDMGSDTSEAPSIKGFVDDAERAGSSIFFMDQP  
GHGRQ RKLVS KSFTPRIVKSFGPQITHIVDGLFEDFRDKGELDVVTDLAY  
PVSIGIICDLFGIPDDERDMLKEWSDDLALSTELPTLGAAIGVLNVFTRD  
EINRFGSVAMAAHAYFADLIHRRRKNPGDDLVSLLATESNGERLTRFEV  
TSVLATL FVA AHSTTNLISGGILALLRNQDEMAVLRENPGLI TNV VDES  
LRYDPPVHLAARMARARTTIGGYDLDPGTIVVVLMAAGNRDPRAYESPDV  
FDVNRKIKNVSLAFGAGAHFCIGSGLAKLEAEIAISAF AQRLKNPEVDES  
SLEYRRHIVVRGLEHMKVSFQP

>CYP1004B4 (2518496743) *Salinispora pacifica* CNR942

MTTSALAPRFDALDPNVVENPYPEYARLRAAGPLCRLGPGSWGVT RFADV  
TSLQHDPRLGSEFPAGYHEVSVGDGPASAFFQRVMLYRDPDHIRLRLV  
SGAFTPAVVRRLRAHIEDLVDELLAPALAAGRMDLVPELAYPLPVRVICR  
LMGIPLES AEDVRHHATNIGRAFTAVVPEQTRVDADEAVSWLREHLGALL  
EKRRSRPGDDL SRLLD AEESGDNL SADEIVDNTVFSFFAGFETTVHMIT  
TGTAALLAHPDQLARLRADPSLVTTAVDEF LRWD APIQGTARYVREPIEI  
GGRTIRRG RVLVLMIGSANHDERRFARPDRLDVGRQDNPHVAFGGGAHLC

LGAYLARMEGAVVFDRLARLAVLEPDGPTVREPNTPFRAVASVPVRIGDG

>CYP1005A6 (2517379615) *Salinispora pacifica* DSM 45548

MSAVLFRSWTKTAGTHWPAVTRVADRQGTGTEHLVVTEHALVRQVLTQVITY  
RPDNALDAVTPIPVLTALRVLAGHRFRLPPTLANNGGVNHPAIRALVADAL  
HPAKVAAQRPWLTELVAERVAAIRATLDAGGSADLHAELSADLPLLVLAR  
LVELPDAPVSAVKQFARAALFWAPLDADRQLALADEVGRFHQVLRIFA  
DTGGGLAAALRATGHPPDVLVGALFFLLVAGQETTSQFLTLLHRLAGEP  
TVRAALQDGSVSVTSVVEEGLRLEPPIVTVRRVAAVDSTLGGTAVPAGTS  
VLLWLARAGRDPAIVPAPDEFPRPGQGRSRRHLAFGAGAHRCCLGDQLARME  
AAVVVEQATPLLDGVTVVVRAPWYPDNLTFRMPDAFVIRR

>CYP211B13 (2517379950) *Salinispora pacifica* DSM 45548

MDASEAVALLMSPPGRLLDPYPTIERLRAHGTVVPTAAGFFVVTGYTEADT  
VLRNPRFGVMDDEEREGVFFHWQESPAAMMSISQSMIRANPPDHSRMRRLA  
AKAFTPRRVAALREVVAQAADGLVDGMIRAGRGGAPVDFLGSFAYPLPVA  
VICALLGVPAADWAQFRRWASDLTGVLPEIITPQELAVADAGARELRDYF  
TELVAQRRRAPADDLTALVQAHDADGDRLSGEELLANLVLLLVAGFETT  
TNLLGNGLVVLLNHPDSATALRDQPELAPSYVEELLRYDSPVQLTTRTVR  
ESVPLAGVELPAGSWLLVLLGAANRDPARFTDPARFDPRAQSPPLSFGA  
GAHYCLGAGLARLEAQAFAFPLLLRRLPELALAGEPTRRNRLTLRGYETLP  
VTVGAVAADHGTPAGVALGTP

>CYP1278B4 (2517380076) *Salinispora pacifica* DSM 45548

MPSPVGAVVHPNPYPYYAAMVAERPFFHFDEQLDTWVAASAAAAQAVLTAP  
GCRVRPPHEPVPQGIGTGPAGDVFGNLVRMTDGEPOHRLKAIVTQTLGAV  
DRSTVAATAMRHARQVLNDSVRTPYEQLMFELPAQVVATLCGLDPAAGGE  
ATRLVGHFVQCIPATASPEQQQRAARAAAGLQELLGSKLDDTQHGLLGDL  
VRMATHVGWTDQAPLLANGVGFLSQTYDATAALMGNTLLALSQQECELP  
SEMALQRFVREVIRHDAPIQNTRRFTATPIRHGDVEVPAGQAVLVLLAAA  
NRDPAANPDPHMFADRTAPNVFTFSAGAHHCPEGETLAVTIVTTVVEQLL  
RVGFDPAKLSTQVSYRPSPNARIPVLTD

>CYP107AW9 (2517380421) *Salinispora pacifica* DSM 45548

METVTGTSAPPPVPYIADPYPTLARIRANGPVSIHLSDEGLPMWVIARYQ  
DVRAALADPRFGQDSRRAQALADNRVAGVTLLGGDIVHMLNSDPPDHTRLR  
RHVQGAFTARRVAAMRPLVERITTSLLDGLAGRTTVDLVQDFAFPLPMLV  
ICELLGFPAEERNVYRSWSTAILTHDDDPATAFATALREMTDYIAVQLRIR  
QTRPGDDLLELLAARDAGQLTDDEIIGMVFLLLIGGHETTNNLLGTATL  
ALMRNPDQHRWLLANQPALPEAIDEFLRYESPAMATLRFTTTPVAVDDV  
VIPAGELVLVSLGGANRDPDRFPDADRLILNRHDTGHLLAFGHGLHRCLGA  
LLGKLEGEVALGALLRRYPRLALAAEVRQLRWRDTIMLRGLESPLVSLHG

>CYP107AX11 (2517380433) *Salinispora pacifica* DSM 45548

MTSPAPVFDQLLLRDPHRRYNALRDEAPVHHIRTPDGAPAWLVTRYDDV  
RAAFTDPRLSVDKRLSSTDGEHGSSLPPELDAHLLNRDPPDHTRLRRFAA  
AAFTPRRVADLRPAVERIVSTLLDGLAGNDHAELIGSLASPLPLQVMQEL  
LGLPTQTSVDFRTWTNTLLSADANQPAQSRSAMASMRFLIEQLAHKRAR  
PGDDLTLGLLAPHADGDRLSDDELVAMLFLLMFAGYDNTAALIGNVAHAL  
LTNAELAEAVRTGSLAVDELVDGVLRWNPSFPLAVRRFAREPVTIAGQLI  
PAGDRIWLCLASANRDPAQFTEPDTLGTGMRCPHLSFGHGIHYCLGAPL  
ARLQTTVAITSLLDRFPGIRLAVPAQDIRWRESFRLRGLVALPVFLSDGC

GSGGTYG

>CYP211C4 (2517380642) *Salinispora pacifica* DSM 45548

MPDIEGLLTRLYSAPGRQDPYPVYADLHAQAAIAALAPRPERQORVAAVAV  
GYDLVAAVLRDPEWGKQPPPGWTDQEILRTLQSSMMFINPPDHGRMRHVF  
AGTFTPRRLGALAPVINRVTDDELLDRMADAGPGEVDFVTEFAYPLPARVM  
AEFIGIPATELTWYRERVDRIDAFLDVAGKTPERLAAANAAGAE LRAFYR  
ELLVHRRRMPGEDLISGLVEAVDAGGVELTEEELISNLIVLFNASFVTTV  
YLLSNGLPVLLAEPEVAAALADDPELTAGAVDEILRLQTPVHLLARAAPR  
DTVLGGVSI PQGQNVLLLIAAANRDP AHFPDPRDFDPRRSGPPSLAFGLG  
LHYCLGA AVSRLEGR LALPRLLSRFPRLRILEQPVYSGSLFLRGIDRLSV  
SPGGRSIRE

>CYP125A66 (2517380770) *Salinispora pacifica* DSM 45548

MTEPRIPKGFDFTDPAVLERRVPREEFAELRRTAPVWWNAQPKGSAGFDD  
DGYWVVTRYADVM AVSRDSE TYSTRENTAIARFQPGTTQADREMQRVIMI  
NVDPPEHTKLRAIVSRGFTPRAINALRGSLAERAERIVRDAAARDTGDFV  
TDVACELPLQAI AELIGVPQHHRKVFWDWSNQLIGYDDPAYGVDPMAASA  
ELLAYAMEMAHERQRNPSDDLVTQLVNAQIDGEHLTADEF GFFVMLLAVA  
GNETTRNAITHGMLAFLENPEQWELFKAERPRSAVEEII RWATPVNVFQR  
TALVDTTLAGQAI SAGQRVALFYGSANFDES VFEEPERFDITRSPNPHLG  
FGGSGVHFCLGANLARLEIELIFNSIADHMPDIRQLADPQRLRSGWINGI  
REL PVQYH

>CYP107AY10 (2517382711) *Salinispora pacifica* DSM 45548

MYQDQPTRAQLAPI PRSGALLGQEYDQLRKTDGVHQVLLPDTSMAWLVTS  
PELVSRALADPRLALNRKHSRGWSGFALPPALDANLLNLDAPDHTRLRR  
LVGPAFSPQRVAALRPRVQRTAEELADTVLATGSPVDLVTGYCTPLSVQV  
IADLLGVPEAGRTDLRAWTDTMLTSYPPDRDAIRRAVVELHG YVVNLIDA  
KQQRPGDDL LSALVATEQEGDRLTRDELTS LAFLILFAGYENTANLIAS T  
VLRLLDHGSLRGVQASEAVEETLRLEPPAPAAVRRFPTEEMTIGGATIPA  
GDTVLLSIAAATRGADGNSARLAFGNGPHFCLGAALARVEAEEAITVLAR  
RLPSLALAVPGAPVRWRPTFRTHGPAELLVTW

>CYP1223A5 (2517383474) *Salinispora pacifica* DSM 45548

MREVGRAVQALFGPAGCAEPYPHYEALRRAAPVCPLPDNIVLVSR YAEAE  
RVIRDPRFLMEDA AWIGQSHPGWTEHPSFRSLMLEMVNHNPPDHARLRLR  
VSRAFTPRRVAELRPAVEQLIDDL LDQMAAREGGTADFMADFALPLPVTV  
IGELLGIPPADRIWFAPRVEAFTDAIEESMRGPSLAEADQAVKELWARLG  
ELADERRRNPRNDMVSELVSVSDSGDDR LSHDELLANLVLLYAAGYETTS  
NLLGNGLAALLERPALKERLRQNPTQASAFVEEMLRFDPP IQIATRYTAQ  
ATTLGGLNIDAGTQII VLGISANRDPDRFADPDEFDPDRADGGSMVFGVG  
AHYCLGAALARMEAEIAFPRL LDRFPAITGHAPGVRRRKSLRGFTQLPIS  
LS

>CYP105AB33 (2517384161) *Salinispora pacifica* DSM 45548

MTETASITTAGASSTATSGPGSGEVTDAEFFVERGCPFSTPAEYEQIREH  
APLAKVRLTTGREAWWIAGHELARAVLADRRFSSDRRRDNFPFVSTD PET  
RKQLQDQPI SMLGMDGAEHAQARRALMGFTVRRMAGLRPRIQQI V DQHI  
DEMLSSEQRSADLVEALS LVPVSLVICELLGV P YADHDFQ AHTGPLVRH  
NTPSQVRVRIQEELNTYLGG LIDRKVADPTDDL LSRQIAKQRAAGTFDRT



SMVSMAFLLLIAGHETTANMISLGVVGLLQHPDQLAKIKEDPEKTPPAVE  
ELLRYFSITDVTARVATEDVQLGDTTINAGDGVVISGLAADHDPTVFTD  
PTRIDLERGARHHVAFGFGPHQCIGQTLARLELQIVFDTLFRRIPTLRLA  
APLDDIPFKSDAIIYGAEELPVAW

>CYP211B11 (2571072052) *Salinispora pacifica* CNH732

MDASEAVALLTSPPGRLDPYPTYERLRAHGPFVVSTAAGFFVVTGYTEADT  
VLRNPRFEVMDDEERDGVFPHWQDSPAMISISRSMIRANPPDHSRMRRLA  
AGVFTPRRVAALREVVAQAADGLVDEMIRAGRGAAVDFMGSFAYPLPVT  
VICALLGVPTADWARFRHWASDLTGVLPEITPQELAIADAGASELRDYF  
TELIAQRRRAPADDLTALVQAHDADGDRLSGEELLANLVLLLVAGFETT  
TNLLGNGLVLLTHPDSATALRGQPELAPGYVEEFLRYDSPVQLTSRTVR  
ESVSLAGVELPAGSWLLVLLGAANRDPARFTDPARFDPRAQSPPLSFGA  
GAHYCLGAGLARLEAQVAFPLLRRLPELALAGEPTRRHRLTLRGYETLP  
VTVGAVPADPGTPAGVALGTP

>CYP107AW7 (2571072364) *Salinispora pacifica* CNH732

VETVTGTSTPPFPYIADPYPTLARIRANGPVSILHSDEGIPMWVIARYR  
DVRAALADPRFGQDARRAQALADNRVAGVTLGGDIVHMLNSDPPDHTRLR  
RHVQGAFTARRVAAMRPLVERITTSLLDGLTGRTTVDLVQDFAFPLPMLV  
ICELLGFPAEERNAYRSWSTAILTHDDDPAAFATALREMTDYIAVQLRIR  
QTRPGDDILTELLAARDAGQLTDDEIIGMVFLLLIGGHETTNNLLGTATL  
ALMRNPDQHRWLLANQHALPEAIDEFLRYESPVAMATLRFTTTPVAVDDV  
VIPAGELVLVSLGGANRDPDRFPDADRLILDRRDTGHLAFGHGLHRCLGA  
FLGKLEGEVALGALLRRHPRLALAAEVRQLRWRDTIMLRGLESPLVSLHG

>CYP107AX4 (2571072377) *Salinispora pacifica* CNH732

MTSQPAPVFDQLLLRDPHRRYNALRDEAPVHHIRTPDGAPAWLVTRYDDV  
RAAFIDPRLSVDKRLSSTDGEHGSSLPELDAHLNRPDPDHTRLRLRLAA  
AAFTPRRVADLRPAVERIVSTLLDGLVGHDQAEILIGSLASPLPLQVMQEL  
LGLPTQTSVDFRRWTNTLLSADANQPAQSRSAMANMRRFLVEQLAHKRAR  
PGDDLLTGLLAAREDDRLTDDELVAMLFLLMFAGYDNTAALIGNVVHAL  
LTNTELPAAVRTGSLALDELVDGVLWRNPSFPLAVRRFAREPITIAQGTI  
PAGDRIWLCLASANRDPAQFTAPDTLGTTGMRRPHLSFGHGIHYCLGAPL  
ARLQTTVAVTILLDRFPGIRLAVPAHDIRWRESFRLRGLVALPVFL

>CYP124M3 (2571072403) *Salinispora pacifica* CNH732

MTVPIELDAVDLSDNDFWTKPLEYRHAVFNALRAQPGLPHFASPEFGSAP  
RGRGYALTRMDDVLAASRNPSVFI SGKGNVAMEVPAEFLDQSLITMDNP  
RHARLRRIVSRGFTMKAVTALMDNASQMAKQIVDEVVERGECDVVDISA  
KLPLGII CKMMGIPDSQQQFVFEQTNVMLGVQDPEYVGEQNDAMLAMSV  
SQELADLMHELATLRKNPTDDLISKLLSAEVNGEALTPSELAHFFILLT  
GAGTETTRNAISWGIQLLTQSPEQREAWLSDIDGVTPTAVEEIVRWSSPV  
ISQRRVAEDAEPVKLAGQLLGPDKVLMFYGAANRDPNYFVHPEGFDVR  
RSPNPHVGYGGPGPHFCLGAHLARLEISVMFRELLTRIPDIHATGEPARL  
KSPLINGIKRLPVAFTPGAR

>CYP208A22 (2571072424) *Salinispora pacifica* CNH732

MTVIADRGGRIPPGPPVTAGLRLLLLALGRDRLGMMTSAAA EYGDVARLPV  
GPKKLYFFNHDPDHAKHVLADNHANYQKGIGLVHARRALGDGLLTSEGELW  
RKQRRVIQPAFQNRRLAQYAGAVGQEATRLVARLATRVDPVPVDVLEMT  
RLTLGLVLRGRTLLDAELTGFGHGVGESFAAVQDQAMFELETINTVPTWIPLR  
RQRRFRRARQHLQEVVDVLA AERGQAVEGRDDVLSRLILSTRAEADPQLG  
RERLRDELVTLLLAGHETTASTLGWSLHLLDQHPELRERVRHEARTVLGD  
RVPAYEDLHQLRYTAMVVEEAIRLYPPVWILTRKARAEDEIGGYRVPAGA  
DILICPYTLHRHPRFWAEPERFDPERFDP SRTTDRPRYAYIPFGAGPRFC  
VGNNLGMLEATLVLA VLLRDLRLEGLPGRAVVPEPMLSLRV

>CYP125A65 (2571072506) *Salinispora pacifica* CNH732

MTEPRIPVGFDFTDPAVLERRVPREEFAELRRTAPVWVNVQPRGSAGFDD  
DGYWVVTRYADVMASRDSETYSTRENTAIARFQPGTTQADREMQRVIMI  
NVDPPPEHTKLRAIVSRGFTPRAINALRGSLAERAERIVRDAAVRGTGDFV  
TDVACELPLQAI AELIGVPQHRRKVFWDWSNQLIGYDDPAYGVDPMAAAA  
ELLYAMEMANERQRNPSDDLVTQLVNAQIDGHELTDEF GFFVMLLAVA  
GNETTRNAITHGMLAFLEHPDQWELFKAERPRSAVEEII RWATPVNVFQR  
TALVDTTLGGQAITAGQRVALFYGSANFDES VFEEPERFDITRSPNPHLG  
FGGSGVHFCLGANLARLEIELIFNSIADHMPDIRKVADPQRLRSGWINGI  
REMPVRYR

>CYP1005A6 (2571073440) *Salinispora pacifica* CNH732

VSAVLFRSWTKTAGTHWPAVTRVADQQGTEHLVVTEHALVRQVLT DQMTY  
RPDNALDAVTPI PVAALRVLAGHRFRLPPTLANNGGVSHPAIRALVADAL  
HPAKVAAQRPWLTTELVAERVAAIRATLDSGGSADLHAELSADLPLLVLAR  
LVELPDAPVSAVKQFARA ALELFWAPLDADRQLALADEVGRFHQVLR EFA  
DTGGGLAAALRATGHPPDVLVGALFFLLVAGQETTSQFL TLLLHRLAGEP  
TVRAALRDGSVSVPNVVEEGLRLEPPIV TWRRVAAVDSTLGGTAVPAGTS  
VLLWLARAGRDPAIVSAPDEL RPGQRGSRRHLAFGAGAHRC LGDQLARME  
AAVVVEQVSPLLEGVTVVRAPWYPDNLTFRMPDAFVIRRG PAGAAER

>CYP107FH3 (2571074485) *Salinispora pacifica* CNH732

VPIELDEAFVQDPYAVYEKLRAEGPAHRVRMPPGVPLIGGLPVWLITGYD  
AVRAALADSRLSTDLHRIDGLFAQKDPDRSHRGGFSSALASHMMHTDPPD  
HTRLRKLVSKAFTTRAIEALRPRIQQTDELTAELAGHDTV DLLDAFAFP  
LPIRVICLLLGVFVAEQENFRSWSRALVSGHSPEAAATAATEVAAYLGDL  
VERKRHATTDDVLTALVA AHDVDDRLTHTELVSTAYLLFIAGFETTLNAL  
GNGTLHMLHRDQWTALRADRALLDNAVEEFRLRLESPLKHATFRCATESL  
RIGDAEIAAGDFVLLAIASANRDP RRFDPHTLDVRRPAAGHLAFGHGHIH  
HCLGAPLARVEVRMAFDALLDAFPDMRLATDPAGLRWRNSTIIRGLDSL P  
VHLNN

>CYP2054A3 (2571074491) *Salinispora pacifica* CNH732

MSISADSEQVQGRFPDPYGAHRDDPYTFLAGLG VFYAPLLDAWCVTRRED  
MVAVLRDDRSFSARDHNPRPAVALPDDVNQMFR TWRGAGAVAVGSLDPPA  
HAKIRDVLNIGFTPARVRAFEPTMRAVAADLADRIGDAPEFDFIADFAVP  
FALEVIGRRLGV PDDYLDRCRTWSEQRIELMMAQGDADHDRLREFARGLM  
EFGEFARSILVRDRVADPRDDLISELLHDGKAGRTLTADEVAVQIPTLI FA  
GHMTCAEALGTIFYQQLRSPGGWARVVDRTIPVGD LVEEGLRFDSPLAGM  
YRTATRDVTVGGIRLTAGSRL LLLYGAAGRDSRAHACPAAFRPGDGSSGH  
LAFGHGHIHFCLGAGFARAELRVAVEVLAARMPDLGLAPGRPPRFRPVFPL  
RALTEL RVTRSGGGSGP

>CYP161N4 (2571074496) *Salinispora pacifica* CNH732

VNTVAQLPFTQTHVLDVAPALRLLQSRGKVHRVRTPEGVPAWLVTGHAEV  
QQLDDDDRLSRSDPGGRDGGTALLNKLLGPLADDPRLRSLLEPQFTPER  
LEPLRAVVEKLTEQHLDELATRTPVDLRPTLAMSLPILVLCEWLGVPAE  
DKGRFSVWTQDAAGVQDPERSQRGLAELFGYCRQLVAAKRQDPADDVISR  
LIATAGIGDTEVVALTALLLFGGYETTVARIGTGVLNLTNPQWAAVRA  
DPALVPATVDELLRRSMPNPHNGGMPRFAVTGFEIDGAAIRAGDLVLLNI  
IAANHDETAFPDPDRLDITRPTAGSLAFGYGRHSCVGAPLARMVLRVALS  
RLITRFPDLRLAVGVDELKLRHETLVGGLVELPVTWGPR

>CYP107AY9 (2571074630) *Salinispora pacifica* CNH732

MSQDQPTRAELAPIPRSGARIGPEYDQLRKTDGVHQVLLPDTSMAWLVTS  
PDLVSRALADPRLALNRKHSRGGWSGFALPPALDANLLNLDAPDHTRLRR  
LVGPAFSPQORVAALRPRIQRTAEELAETMVATGSPVDLVTGYCTPLSVQV  
IADLLGVDPAGRTDLRAWTDMLTSYPPDRDAIRQAVVELHGYVVNLIEA  
KQQRPGDDLLSALVATEQEGDRLTRDELTSALFLILFAGYENTANLIAS  
VLRLLDHGSLRGVRVSEAIEETLRLEPPAPAAIRRFPTTEMTIGGATIPA  
GDTVLLSIAAATRGADGNPARLAFGNGPHYCLGAALARVEAEEAITVLAR  
RLPGLALAVPGAPVRWRPTFRTHGPAELLVAW

>CYP244A10 (2571074650) *Salinispora pacifica* CNH732

MQDTAQANLAEAPEVRMPIELRPTDCLPELLAAARVAPVVRTPYLDQHAW  
VVCDELVKQALTHPKLGKDVALAPDWMRQPGQMTAMPPEYARMMVMS  
DGEHHARIRRIHAPVLSRPNTERWSERVAALVDGFLDNLDSADGTEVNLI  
TDYTHKIPLAFTAEMGLPPGAERRLHDITEVMLYSADYALRQQAVGELF  
EAVQEWVRDPAGLRDGVITGLLASADGPDATVTKGEAIVWTLISLIINGYE  
TTGSLISAALYEALRRPARERPHTDEAVAAWIEETLRVQPPVPHTTWRFA  
LADLDLGGYLIPRGAPVQISLAAANLDPDEDADSFDAQRRGRGHLSFGLG  
AHYCIGAPLARVQTKIALRGFLRRFPQARLSLDTAPRWESEWMIRMSVL  
PVLLA

>CYP105AB32 (2571075163) *Salinispora pacifica* CNH732

MTETTSTTTTSGISSTTTSGPASGEVTDAEFFPVERGCFFGTPTEYEQIREH  
SPLAKVRLTTGGEAWWIAGHELGRAVLADRRFSSDRRRDNFFFISTDPE  
RKRLRDQPTSMGLMDGAHAQTRRALMGEFTVRRMAGLRPRIQQIVDQHI  
DEMLSSDQRTADLVEALSLPVPSLVICELLGVPIADHDFQARSGLVVRH  
HTPSKVRVRIQEELNTYLGALIDRKVTDPTDDLLSRQIAKHHAAGTFDRT  
EMVSLAFLLLIAGHETTANMISLGVMGLLQHPDQLAMIKEDPEKTPPAVE  
ELLRYFTITDVTARVATEDVQVGDTTINAGDGVVISGLAADHDPTVFTD  
PDRDLERGARHHVAFGFGPHQCIGQTLARIELQIVFDTLFRRIPTLRRLA  
APLDDIPFKSDAIYGAERLPVAW

>CYP107E37 (2571075683) *Salinispora pacifica* CNH732

VTIDQEIREYPPFRESRGIGIDPTYELLRRTEPLARVQLPYGEVSWLVTRY  
EDVKTVLTDPRFSRAAAQGKDQPRTRAEMTYEGIIIGLDPPDHTRLRRLAG  
KALTARRVNIAIRADAQRIANEYVDEMIAGKSPGDLVELFALPYPVTVICE  
LLGVPFEDRAQFRIWTEGLTSTSEQLMVYAEQLFDYMGKLVAQRRAEPTD  
DLLGALVKARDEGDRLTEQELLSIAGVGLLLTGIVETVSTHINPFVYALLT  
HPELMAQLRADRSVPAAVEELLRMIPLNPAAMFFPRYAVEDVTLSGITVR

AGQPVLVSLPGANRDPEVFENPETFDFTREQNPVAFGHGPHHCLGAQLA  
RMELQVALHTVLDLDRFPDLRLADGDEGVSWKSGLLVRGPSRLLVGW

>CYP1004A3 (2518496747) *Salinispora pacifica* CNR942

MRANTARPHLSAAFLATKDDPYPAYAELRARGPLTRAELGQWLVTGHGAV  
SALLRDGRLESMPAEYTRLTGLDSPGVDFLHRIVLTRTPPEHTRLRRI  
GQALGTPVVRRLHDRIAAATDALLEPALDRGRLDVVTELAVPLPVGVVCD  
LIGIPTGDRPAVLTRVTALAKVFDAANLSPADLADINTALPWLHDYFGDL  
LATRRVSPGGPTLAEMYWEESASDRLAVADFVDNMLFLFHAGFETTMGLV  
SNGVAALLNHPEQLGRRLRADPALVPSAVEEFLRYDAPIQNVRVARKPVE  
VAGQKIRAGRTVLLLLGAANRDEKVFADAERLDVGRDPNPHLGGGGLHH  
CVGTALARLMAVVVFERLVGRVAVLGPAAPAVRRRHASLRSYDHLPLVVA  
AR

>CYP125G4 (2518496786) *Salinispora pacifica* CNR942

MSTEIVSTGNRADIAPATYAAGVPYAEFARLRREEPVSWVPEAPLWRRS  
GEGRILSQGPFWAVTTHEGVVAASRQPEVFFSSGRQGAFLADPRTTADLE  
QARQLLVNMDAPQHARVRLVTAVFTPRAIRALGESVTAHARNLVERAVR  
QEEDVVADLAELPLLVLADLLGLPREDRHLLYQWSNNLVGFDDPEYGG  
GDVEAYRRTFFFAFYALSVADERRRAPREDLMTLLATGEADGRRLTDRE  
FCNFWLLLVVAGNETTRHLITGSLVALVDNPTQRRERLVADDTLLPSAVEE  
LLRWVSPIMQFRRTAIVDTELHGTPIAAGDKVVLWYASANRDAAVFEAPD  
ELRLHRNPNPHLSFGMGPHFCLGAHLARLEARAMLRELAPHLRSFRLSGQ  
VVRLESNFVNGVKSPLGFSFTEQ

>CYP208A24 (2518496866) *Salinispora pacifica* CNR942

VTALADRPSRLRPPGSPSPWSAPWLLARMARNRLDVMRSVSARYGDAVRLP  
LGPKTLYFFNHPDHAKHVLAENPGSYHKGIGLVHARRTLGDGLLTSEGEL  
WRKQRKTIQPVFQARRIARQAGAIABEAVGLADRLHTMVGRDDPVDIRHE  
MTDLTLGVLGRTLDDTLGDFGGIGDAFESVQDQAI FEMMSLGAVPTWVP  
LPRQRRFRARRAELOQDVVDQLVARRRAAGGVEGRDDVVSRLIESTGEETD  
PQVARQRMDELVTLLLAGHETTASTLTWAFQLLDQHHDVWERVHAEAVE  
VLGDRIPVYEDLHRLRYTAMVVDEVMLRYPPVWLLPRIAQRDDVVGGYHV  
PAGADLVLCPYTLHRHPEFWPEPDRFNPDRFDPELGTDRPRYAYIPFGAG  
PRFCVGNLTGLMEAVFVIACVARRLRLSVQPGYRLVPEPMLTLRVRGGLP  
MRVHEA

>CYP125A15 (2518496962) *Salinispora pacifica* CNR942

MTEPRIPAGFDFTDPAVLERRVPREEFAELRRTAPVWWNVQPRGAAGFDD  
DGYWVVTRYADVMASRDSETYSTRENTAIARFQPGTTKADLEMQRVIML  
NVDPPPEHTKLRAIVSRGFTPRAINALRGSLAERAERIVRDAAVRGTGDFV  
TDVACELPLQAI AELIGVPQHHRKVF'DWSNQLIGYDDPAYGVDPLAAAA  
ELLYAMEMANERQRNPSDDLVTCLVNAQIDGEHLTTDEFGFFVMLLAVA  
GNETTRNAITHGMLAFLEHPDQWELFKAERPRSAVEEII RWATPVNVFQR  
TALVDTTLGGQAI SAGQRVALFYGSANFDESVEEPPERFDITRSPNPHLG  
FGGSGAHFCLGANLARLEIELIFNSIADHMPDIHKVAEPQRLRSGWINGI  
REMPVRYR

>CYP211C5 (2518497102) *Salinispora pacifica* CNR942

VLDVEDLLARLYSAQGRQDPYPVYANLHAQGAIAALAPRPERQ RVAAVAV  
GYDLVAAVLRDPEWFKQPPPDWTEQEILRTLQSSMMFINPPDHGRMRHVF

AGTFTPRRLGALEPVINRVTDDELDRMADVGPGEVDFVAEFAYPLPARVM  
AEFIGIPATELAWYRERVDRIDEFLDVAGKTPERLAAANAAGADLRAFYR  
ELLARRRRTPGDDLISGLVEAVDAGGVELTEDELISNLVVLFNASFVTTV  
YLLSNGLPVLLAHPEVAAALANDPELAAGAVDEILRLQTPVHLLARTAPR  
DTVLGGVSIPQGGQNVLLLLIAAANRDPARFPEPDRFDPRRPGPPSLAFGLG  
LHYCLGAAVSRLEGRALPRLLSRFPRLRILEQPVYSGSLFLRGIDKLSV  
SPGGREHP

>CYP1005A6 (2518498742) *Salinispora pacifica* CNR942

VSAVLFRSWTKTAGTHWPAVTRVADQQGTEHLLVTQHALLVRQVLTQVTV  
RPDNALDAVTPIPVAAALRVLAGHHFRLPPTLANNGGVSHPAIRALVADAL  
HPAKVAAQRPWLTTELVAERVAAIRATLDAGGSADLHADLSADLPLLVLAR  
LVELPDAPVSAVKQFARAALFWAPLDADRQLALADEVGRFHQVLRIFA  
DTGGGLAAALRATGHPPDVLVGALFFLLVAGQETTSQFLTLHRLAGEP  
TVRAALRDGTVSVTNVVEEGLRLEPPIVTVRRVAAADSTLGGTAVPAGTS  
VLLWLARAGRDPAIVPAPDEFPRPGQSGRRHLAFGAGAHRCCLGDQLARME  
AAVVVEQVTPLLDGVTVVRAPWYPDNLTFRMPDAFVIRR

>CYP163B18 (2518498936) *Salinispora pacifica* CNR942

LTRTIDLADPATFATHDLTNFWQRLRDEEPIYWNPPPTGGRRGFVLSRHA  
DILEVYRDDINFTSERGNVLVTLLAGGDAGAGRMLAVTDGPRHAELRKLL  
LRALGPRVLGPVCSAVRTNTRQMIGEAAAASGECDFATDVASRIPMITISN  
LLGVPEADRAALLKMTKTALSADDESVSSETESEVARSEILLYFQDLVEFR  
RKKPGEDVVSMLVNSSIDGVPLSDDDVVLNLCYSLIIGGDETSRLTMIDSI  
YTLAANPEQWMRLKGGRCIDKAVDEVLRWASPSMHFGRTAVRETDIHGE  
RIRVDDIVTLWHASGNRDERAFSQPEVFDLGRAPNRHLSFGHGPHYCIGS  
YLAKVEISELLMALRDLTRGFEIIGEPQIRSNLLTGFSMPVRFVSA

>CYP105AB25 (2518499154) *Salinispora pacifica* CNR942

MPETASITTPGTSSTTPSGTSSTATSGPASGDLADVEFPVARGCPFSTPA  
EYEQIREHSPITKVRLTNGGDAWWIAGHELGRAVLADRRFSSDRRRDNFP  
FVSTDPETRKQLQDQPTSMGLMDGAEHAQARRALMGFTVRRMAGLRPRI  
QQIVDQHIDEMLSSEQRSADLVEALSPLVPVSLVICELLGVYPYADHDFQQA  
HSGPLVRHNTAPEVRARIQRELNTYLGALIDRKVTDPTDDLGRQIAKQR  
AAGTFDRTSLVSMAFLLLIAGHETTANMISLGVVGLLQNPDLAMIKEDP  
EKTPPAVEELLRYFTIADTVTARVAIEDVQLGGTTINAGDGVVISGLAAD  
HDPTVFVTDPRIDLERGARHHVAFGFGPHQCIGQTLARMELQIVFDTLFR  
RIPTLRLAAPLDDIPFKSDAFVYGAEKLPVAW

>CYP1207A12 (2518499459) *Salinispora pacifica* CNR942

MITVPPTDRYLLDEDLVADPPYPYLAELRVAEPVRWSPVHRAWLVTGYEAA  
ASCYAEPAISADRIGPMLAQTPLELLSPEAARAFTIMAGWMVFVDPPEHR  
RLRSVFRGAFGARQVRRNRPMVQEAVTRLTARTGTVGDTVDLVAEFARPL  
PATVAASWMMGVPEDTAMFQRWAIQVGDALGTVQSPEEYERSQQALLDL  
FDYLRMLVRTRRATPGEDLISAALANGLVGDSVSEDEFVAMLTHVAFAGG  
ETTSNLIAGVTWNLLRRPDQLALLRAEPAPVAIEELLRFDPGSKMSIR  
HVKNDELALAGQRLRAGQRLYVVVTAGANRDPDYFDHPNELDVRRHPNPHLG  
FGQGGHFCLGAPLARLVAGAALTDLLAAAPGLALATAEVRWQPSLLNRS  
QELPVR

>CYP211B17 (2518499926) *Salinispora pacifica* CNR942

MDASEAAALLMSPPGRLDPYPTYEQ LRAHGPPVPTAAGFFVITGYAEVDT  
VLRNSRFGVMDGEVRDGVFPHWQDSPAMMSIAQSMIRANPPDHSRMRLA  
AGAFTPRRVAALREVVAQADELVDDEMIRAGRGGAPVDFMSSFAYPLPVT  
VICALLGVPAAADWAQFRRWASDLTGVLEPEITPQELAIADAGASELRAYF  
TELIAQRRRAPADDLTALVQAHD TDGDRLSGEELLANLVLLLVAGFETT  
TNLLGNGLAVLLTHPDSATALRDQPELAPGYVDELLRYDSPVQLTTRTVR  
ESVPLAGVELPAGSWLLVLLGAANRDPARFTD PARFDPGRAQSPPLSFGA  
GAHYCLGAGLARLEAQVAFPLLLRRLPELALAGEPTRRNRLTLRGYETLP  
VTVGAVAAGHHGMPAGAALGTP

>CYP107AY3 (2518501126) *Salinispora pacifica* CNR942

MSQDQPTRAELAPIPRSGAQLGQEYDEFKAGDVHQVLLPDSSSLAWLVTN  
PELVSRALADPRLALNRRHSQGGWSGFALPPALDANLLNLDAPDHTRLRR  
LVGPAFSPQRVAALRPRIIRRTAEHLLDILVATTD PVDLVTGYCTPLSVRV  
IADLMGVPEAGRADLRWTWDTMLTSYPPDRAAIRQAVVELHG YVVSLIAA  
KQQQPGDDL SVLATIEQDGDRLTRDELTS LAFLILFAGYENTANLIAST  
VLRLLDHGGIRDVRVPA AIEETLRLEPPAPAAVRRFPTEEMTIGGATIPA  
GDTVLLSIAAATRGADGSTTRLA FGN GPHFCLGAALARVEAEEALTVLAR  
RLPGLALAVPVAQVRWRPTFRTHGPAELLVTW

>CYP107AX3 (2518501647) *Salinispora pacifica* CNR942

MTSRPTAVFDHRLLRDPRARYNALRDQAPVHHVLT PDGAPAWLVTRYDDV  
RAAFTDPRLSVDKRFSGTDGEHGSSLPELDAHLLNRPDPDHTRLRLRLAA  
AAFTPRRVADLHPAVERIVSTLLDGLAGHDRAELIGSFASPLPLQVMHEL  
LGLPTQANIDFRTWTNTLLSADANQPAQSRAAMANMRRFLIEQLTHKKAQ  
PGDDL LTGLLAAREDDRLTDDEL VAMVFLLMFAGYDNTAALIGTVTHAL  
LTNAELHEAVRGGSALDELIDEVLRWNPAFPLAVRRFA REPIT IAGQTI  
PAGDRIWLCLASANRDPAQFTQ PDELGIVGLRRPHLSFGHGIHYCLGAPL  
ARLQTTIAVTNLLNRFPKMRLAVPAHDIRWRESFRLRGLIALPVYL

>CYP113X1 (2518499515) *Salinispora pacifica* CNR942

VTTSETTIPPQPNVNDAAIYPWYRMMRDEHPVRRDPVTGWWVYRYDDAR  
HVLTNPQIFSSSEMHRMGYPESGLES LPQMDPPRHTRVRRI LGTAFTPHSI  
GEFEPLIVRITNEVIDGFVDKDRVDFVAELAYTVPIAVILEVLGLPSEDR  
VHFYDWARRVMDVTPEQMAQEGYAESLFDMQQDAVSYLREKVHERRGKAG  
DDMLTRLANAQLDGDTLTDDETANFANVMFAGGHISTMTIANTIDLLDM  
NGQAQRDVRDNPSLLPQAIEEVLRRHRPPITTGLRGSTRDVELGGVTIPKH  
QYVAASFCSANRDERQFTHPDAFDIHRAGEVRHFGFGFGTHHCIGNALGR  
LETRLVVRTLHERFKKITVDRDGEVAVAKPPQMVG YDKLPVVLQPA

>CYP154J2 (2515956097) *Salinispora pacifica* CNT029

MDHTAEKSGGYPYPLDPNGTDTHGETKTLREQGPIARVELPEGVVAWSVH  
GYEAGKQIMSDERFSKNPRKSWPAYINGEISPGWPLITWAVMDNMATHDG  
EDHARLRLRLLLRAFTTGRVESMRPRIRATVNELLNLD AAGANGPIDLRA  
TYTQELPTRL MCDLFGVPEDRRAEVLQGGHTNVDTRISSEVAEANVVQWE  
NAIAELVTYKHNPGDDLTSALISAKEEDGSRLSDNELVGT LHLLLGAGS  
ETLVNGLSHAI IAVLTDPELRAGVTGGEISWDDVFEETLRVESPV AHLPF

>CYP244A5 (2515956308) *Salinispora pacifica* CNT029

MSATTNAELGEAPETSMFPVDPGLFDCMPDLIAAARIAPVVRIPYLGRHAW

VVCDRELVKQALTHPKMGKDITLVPEWMRQPGLMVTAQPPPEYARAMIMS  
DGENHARIRRIHAPVLSRPNTERWGEQVAAKVEGFLELSKAAAGSNAEV  
DVVTNYTHKIPLAFISEMLGLPPAAEHRLRSITDIMLYSSDYAARREAIG  
GLFGAVEEWVRNPDGLRDGVITGLLAGSDGPGAAVTEGEVIVWTLGMIIT  
GYETTGSLISTSLYEALRRPPHERPRTDEDITAWIEETLRVHPPFPHTW  
RFPLEDIELGGYLIPKGAPVQVSIAAANRQPGEGADSFDTERRGHGHLSE  
GLGMHYCIGAPLVRLEAKIAVRGFLRRFPQARLSADTAVQWESEWMIRRM  
SFLPAVLS

>CYP245A11 (2515956312) *Salinispora pacifica* CNT029

MSSTTLPRFTLTGWNREDIVNPYPVYRRYREVAAVHRGEAGGDAPETFYV  
FSYDQVAQVLSSSCFGRGRSLDATAASVPVPADQKALRAVVENWLVFMDP  
PRHTELRSLLNRSFSPRIVTGLRPRIARIAQELLSRLGRQVETDLVEGFA  
APLPILVIAELLGIPAERHGWLRTNALALQEASSSRARRDAAGYARAEAA  
AQEFTEYFREQVRLRRGSAGDDLLTILANAQLRGAPVSLDAVVGTVHLL  
TAGHETTTNSLAKAVLALQHPAVLEELRGADGLTADSIEEFLRYDPPVQ  
AVTRWTHQDCTLGGWEVPRGSRVVALLGANRDPARFPLPDALDVHRPAD  
RQLGFGLGIHYCLGATLARAELEIGLQTLNGLPTLGYPAQYVDYADDMV  
FHGPSRLILVNPGERFCQ

>CYP107AW6 (2515956401) *Salinispora pacifica* CNT029

VETVTGTSAPPPVPYIADPYPTLARIRANGPVSILHSDEGVPMWVIARYR  
EVRAALADPRFGQDARRAQALADNRVAGVTLLGGDIVHMLNSDPPDHTRLR  
RHVQGAFTARRVAAMRPLVERITTSLLDGLAGRKTVDLVQDLAFPLPMLV  
ICELLGFPAEERNAYRSWSTAILTHDDDPVAFATALREMTDYIAVQLRIR  
RSRPGDDLLTELLAARDAGQLTDDEIVGMVFLLLIGGHETTVNLLGTATL  
ALLRNPQHRWLLANRHALPEAIDEFLRYESPVAMATLRFTTTPVTVDDV  
VIPAGELVLVSLGGANRDPDRFPDADRLILDRDGTGHLAFGHGLHRCLGA  
FLGKLEGEVALGALLRRHPKLALATEVRQLQWRDTIMLRGLESPLVSLHG

>CYP107AX9 (2515956416) *Salinispora pacifica* CNT029

MTAQPAVFDQRLLRDPHRRYNALRDQAPVHRVRTPDGAPAWLVTRYDDV  
RAAFTDPRLSVDKRFSGTDGEHGSSLPPELDAHLLNRDPPDHTRLRLRLAA  
AAFTPRRVADLRPAVEKTVSTLLDGLAGNDHAELIDSLASPLPLQVMHEL  
LGLPTQTSVDFRTWTNTLLSADANQPAQSRSAMANMRRFLIEQVAHKRAQ  
PGDDLLTGLLCVREDDDGLTDDELVAMLFLLMFAGYDNTAALIGNVIHAL  
LTNVELAEAVRTGSLAVDELVDGVLRWNPSSFPLAVRRFAREPITIAGQTI  
PAGDRIWLCLASANRDPAHFTEPDEIGIADMRRPHLSFGHGIHYCLGAPL  
ARLQTTVAVASLFDRFPGIRLAVPVQDIQWRESFRLRGLVALPVSL

>CYP208A21 (2515956427) *Salinispora pacifica* CNT029

MTTTSIDRRRPPGPPRAAALSMLLTMSRDRLGMMTAAARAYGDAAWLPVG  
HKALYFFNHPDYAKHVLTDNSDNYTKGIGLVHARRALGDGLLTSEGELWR  
EQRRVIRPSFRSGRAPDQASVIAEEVASLVERLRARAGGPPVNVVTEFTG  
LTLGVLGRITLLDVDTALATVGDAFAAVQDQAMFELVTL SAVPTWIPLTR  
QRRFRRARAELERIVDDLVARRGDVSGRDDVLSRLILSTGAEPDARVRQ  
RLRDELVTLLLAGHETTASTLGWTLYLIDRHPPVRERLRAEAAEVLGDRL  
PAYRDLPLDRFTTMVVQEAMRLYPVWLLPRRSRRADRVGPYVWPAGSDV  
VVSPTMHRHPGFWEPEPDRFDPLRFDPRNAADRPRYAYLPFGAGPRVCVG  
SNLGMTEAVIAVAMLCRELRLVRVPTHAAVPEPMLSLRIRGGLPMSVHLA  
D

>CYP154M16 (2515956442) *Salinispora pacifica* CNT029

MPDRCPVLDPSPGRDIHAEADRLRAQAPAVKVELPGGVHAWSSITSYDVVRR  
LLLDNRNVTKNARNHWPKFINDIIPPDWEMISWVAMDNMVTAYGKHLVRLR  
RLIAKAFTAQRVETVRPQVEKLVDELDDGLAAETGEVVDLREKFCYPLPA  
LLIADLIGMTEQQRAQTAKAMDLMVDTTVSPEQAQAILTGWRTAMDELIA  
AKRREPGKDIASDLIAARDDENGGLTDSELTDITFAILGAGSETTINFL  
DNAVTALVTHPGQLELVRSGRAGWDDVIDEVLRVQCPLASLPLRYAVTDI  
ELDGVTIPQGDPIILINYAAAAGRDPALHGDGTAGEFDVTRENKEHVSFGHGP  
HYCLGAGIARLVATIGLSRLLFERFPDLRLAVPAEELQPLPTFIMNGHRAL  
PVRLVPAPAAATAV

>CYP211C6 (2515956696) *Salinispora pacifica* CNT029

VPDIEGLLARLYSAQGRQDPYPVYADLHAKAAIAALKPRPERQRVAAVAV  
GYELVAAVLRDPEWFKQPPPGWRDQEILRILQSSMMFINPPDHGRMRHVF  
AGTFTPRRLGALEPVINRVTDDELDRMADAGPGEVDFVAEFAYPLPARVM  
AEFIGIPATELAWYRERVDRVDAFLDVAGKTPERLAAANAAGAELSFYR  
ELLAHRRRTPEGDLISGLVEAVDAGGVELTEDELISNLIVLFNASFVTTV  
YLLSNGLPVLLAHPEVAAAALTSSPELAAGAVDEILRLQTPVHLLARAAPR  
DTVLGGVSIPQGQNVLLLIAAAANRDPAHFPDPDRFDPRRSGPPSLAFGLG  
LHYCLGAAVSRLEGRALPRLLSRFPRLRILVQPVYSGSLFLRGIDKLSV  
SPGGREHP

>CYP125A66 (2515956829) *Salinispora pacifica* CNT029

MTEPRIPVGFDFTDPAVLERRVPREEFAELRRTAPVWWNAQPKGSAGFDD  
DGYWVVTRYADVMAVSRDSETYSTRENTAIARFQPGTTQADREMQRVIMI  
NVDPPPEHTKLRAIVSRGFTPRAINALRGSLGERAERIVRDAAGRAGDFV  
TDVACELPLQAI AELIGVPQHRRKVFWDWSNQLIGYDDPAYGVDPLAASA  
ELLAYAMEMAHERQRNPSDDLVTKLVAQIDGEHLTADEFGFFVMLLAVA  
GNETTRNAITHGMLAFLENPEQWELFKAERPRSAVEEIIIRWATPVNVFQR  
TALVDTTLAGQAI SAGQRVALFYGSANFDES VFEEPERFDITRSPNPHLG  
FGGSGVHFCLGANLARLEIELIFNSIADHMPDIRKVADPQRLRSGWINGI  
RELVPQYH

>CYP1005A8 (2515957844) *Salinispora pacifica* CNT029

VSAVLFRSWTKTAGPHWPAVTRVADQQGTEHLVVTEHELVRQVLTDQVTY  
RPDNALDAVTPIPVPALRVLAGHGFRLLPPTLANNGGVSHPAIRALVADAL  
HPAKVAAQRPWLTKLVAERVAAGATLDSGGSADLHAELSADLPLLVLAR  
LVELPDAPVSAVKQFARAALFVWAPLDADRQLALADEVGRFHHQVLRIFA  
DTGGGLAAALRTTGHPDVLVGALFFLLVAGQETTSQFLTLLHRLAGEP  
TVRAALRDGGVSVANVVEEGLRLEPPIVTVRRVAAVDSTLGGTAVPAGTS  
VLLWLARAGRDPAPVPADEFPRPGQRGSRRHLAFGAGAHRC LGDQLARME  
AAVVVEQAAPLLDGISVVRAPWYPDNLTFRMPDAFVIRR

>CYP211B14 (2515958942) *Salinispora pacifica* CNT029

MDASEAVALLMSPPGRLDPYPTYERLRAHGPPVPTAAGFFVVTGYTEADA  
VLRNPRFGVMDDEERDGVFPHWQDSPAMMSISQSMIRANPPDH SRMRRLA  
AGVFTPRRVAALREVVAQADELIDEMIRAGRGGAPVDFLGSFAYPLPVT  
VICALLGVPAADWAQFRRWASDLTGVLPEEITPQELAIADAGATELRDYF  
TELIAQRRRDPTDDLTTALVQTHDADGDRLSGEELLANLVLLLVAGFETT  
TNLLGNGLFVLLTHPESATALRDQPELAPGYVDELLRYDSPVQLTTRTVR  
ESVPLAGVELPAGSWLLVLLGAANRDPARFTDPARFDPGRAQSPPLSFGA



GAHYCLGAGLARLEAQVAFPLLLRRLPELALAGEPIRRNRLTLRGYETLP  
VTVGAVAVDHGTPAGAALSTP

>CYP107AY7 (2515960152) *Salinispora pacifica* CNT029

MRAEPAPIPRSGARLGQEYDQLRKTGDVHQVLLPDTSLAWLVTSPELVSR  
ALADPRLALNRKHSRGGWSGFALPPALDANLLNLDAPDHTRLRRLVGPAPF  
SPQ RVAALRPRIERTAEELVDTVVATGSPVDLVTGYCTPLSVQVIADLLG  
VPEARRTDLRAWTDMLTSYPPDRDAIRQAVVELHGYVVNLEAKRQRP  
DDL SALVATEQEGDRLTRDELTSALFLILFAGYENTANLIAS TVLRLLG  
HGS LRGARASEAIEETLRLEPPAPAAIRRFPIEEMTIGGATIPAGDTVLL  
SIAAATRGTDGNSARLAFGNGPHFCLGAALARVEAEEAITVLARRLPSLA  
LAAPGAPVRWRPTFRTHGPAELLVTW

>CYP105BL5 (2515960404) *Salinispora pacifica* CNT029

MSSHSAAPGPETATPLHTLAPELTFPQFERATPFDPPEAYTELSGRCPV  
APVRMADGKPSWLITSFEGVRAALSDPRLSSDMSHPGFNRTGKPVDDL  
KDTLGAMDGERHRYRRLMTGELTVRRAKAMRPVITQITDEALDQLAAAG  
PGADLVKHVALVVP SRVACHLVGIP LSEYELFTGMAAKLMEATSSADQIA  
ALQDMVSYFDKLVTDREHHDRDDLGHMVRRYLATGELTREMLIRLAWTT  
MAAGQETTAHMI GLGVAALLRHPDQLELLRREPHLMPGAVDELMRYLPMI  
QFGIPRVAMDDLEVDGQTVTAGEGVVALPPLANRDPVFERPDELDVRRN  
ARQHLSFGYGP HQCPAHALARLELEVVSRLLERFPTLRLADGDADLKVQ  
DEDIMYNVSELAVAW

RFATEDLEVGGARITAGDVLLVDFAGIGRDPEVHGATADNFDATRANKAH  
LSFGYGVHYCLGARLAKMAAMIGLPALFERFPDVEMAAPKSALEFPQGSFV  
VNGFKELPVHLKGRAAGAA

>CYP208A12 (2517933721) *Salinispora arenicola* CNX814

MTLDTITPRVPLGPRTAALRMLLVMKRDRLGMLTSAAARYGDASRLPVG  
HKALWFFNHPRYAKHVLADNSANYHKGIGLVHARRALGDGLLTSEGDLWR  
KQRKVIQPAFQSRRIAQQAGMIAEEAFALVERLRARAGAGPVELTAEITG  
LTLGVLGRSLLDADLAGFDSIGDSFATVQDQAMFELETINAVPMWIP LPR  
QIRFRARRRKLQAVVDTLVDGRAGNLADRVDVLSRLILSARGEADPRVGR  
ERLRDELVTLLLAGHETTASTLGWTL SLIDRHPGVWERLHAEAVEVLGDR  
LPEYDDLRLRLRYTVMVVEEAMRLFPPVWLLPRRALAPDTIGEYRV PANAD  
VVISPYTLHRHPEFWPNPERFDPERFAPGQAADRPRYAYLPFGAGPRFCV  
GNNLGMMEAVFVIALLCRHLRLTGVPGYRLVPEPMLSLRIRGG LPLVVRP  
VS

>CYP125A41 (2517934162) *Salinispora arenicola* CNX814

MTEPRIPAGFDFTDPEVLAHRVPREEFAELRRTAPVWWNAQPRGSAGFDD  
DGYWVVTRYADVMTVSRSDTYSTRENTAIARLRPD TTREDIEMQRVIML  
NVDPP EHTKLRAIVSRGFTPRAINALRGSLAERA EHIVRDAAVRGV GDFV  
TDVACELPLQAI AELIGVPQHRRKVFDWSNQLIGYDDPAYGTDPLTASA  
ELLAYAMEMAERQ RSPSDDLVTKL VNAQIDG EHLTTDEF GFFVMLLAVA  
GNETTRNAITHGMVAFLDNPEQWELFKAERPKSAVEEII RWATPVNVFQR  
TALVDTVLGGQAI SAGQRVALFYGSANFDEAVFEDPERFDITRSPNPHLG  
FGGSGAHFCLGANLARLEIELIFNSIADHL PDIRKVAAPQRLRSGWINGI  
RQMPVRYR

>CYP245A7 (2517934332) *Salinispora arenicola* CNX814

MPSATLPRFALTGWSRENIVNPYPVYQRYREVASVHRGEPGGDAPDTFYV  
FSYDEVVQVLSSNCFGRGRSLDAAKASVPVPAEQKALRAIVENWLVFMDP  
PRHTELRSLNRSFSPRIVTELRPRIARIAQELLSRLGQQVDVDLVESFA  
APLPILVISELLGIPEERRAWLRANALALQEASSSRAGRDVDGYARADVA  
AQEFTEYFREQVRLRRGRAGGDLITILANAQERGAPVSLDAIVGTCVHLL  
TAGHETTTNSLAKAVLALREHPAVLDELRGAEGLTTDAVEEFRLRYDPPVQ  
AVTRWAHQDCTLGGCDIPGRSRVVALLSANRDPARFPSPDVLVRRPAD  
RHLSFGLGIHYCLGATLARAELEIGLQALLDGVPTLGYGTQHVDYADDLV  
FHGPSRLVLVNLGERCK

>CYP244A4 (2517934336) *Salinispora arenicola* CNX814

MSTTTNTELTEAPETNMPVDPGLFDCMPDLIAAARVAPVVRIPYLGRHAW  
VVCDELVKQALTHPKMGKDIALVPEWMRQPGMLMVTAPDPEYARAMIMS  
DGENHARIRRIHAPVLSRPNTERWGERVADKVEGFDELQSAGSGGSTEV  
NVVTNYTHKIPLAFISEMLGLPPEAEHRLRGITDIMLYSSDYAARREAIG  
GLFGAVEDWVRNPADLRDGVITGLLAASDGPDAAVTEGEVIVWTLGMIIT  
GYETTGSLLISTSLYEAIRPPHERPKTDEDITAWIEETLRVHPPFPHPPTW  
RFPLEDIELGGYLI PKGAPVQVSIAAANRKPGEGADSFDAERRGHGHLST  
GLGMHYCIGAPLVRLEAQIAVRGFLRRFPQARLSAETAVQWESEWMIRRM  
SVLPAVLS

>CYP166A4 (2517934663) *Salinispora arenicola* CNX814

MTDAISFELPWARTDKFDPPAVFDALREQRPLARMRYPDGHVGWIVSSYE  
LVREVLGDPRFSHSCAVGHFPVTHQGQVIPTHPQIPGMFIHMDPPEHTRY  
RRLLTGEFTVRRTSRLTGHVEGVATEQIEVMREHGAPADLVATFARPLVL  
RVLSGLVGLPYGERDRYLHAVTLLHDAEADPAEAAAAYEQAGAYFDEVIE  
RRRRQPEDDLISTLVGDGELTGEELRNIVTLLLFAGYETTESALAVGMFA  
LLHHEDQLARLRADPTKIDAAIEELLRYLTVNQYHTYRTASEDIELHGEV  
INKGDSVTVSLPAANRDPARFACPAELDIDRETSGHVAFGFGIHCCLGQN  
LARVELRAGLSALLRAFPNLRRLAVPADEVPLRLQGSVFAVKNLPVCW

>CYP211B2 (2517934704) *Salinispora arenicola* CNX814

MDVSEAI AVLISPSGRLDPYPTYEQLRVHGVPVSRTTAGLFVVVTGYAEADM  
VLRDPRFVVLDDDLRDDVFPHWQDSPAIKSIARSMLRTNPPDHSRIRRLA  
AGAFTPRRVAAMREVVTAQADELVDEMIRAGRDGARVDFMDMFAYPLPVA  
VICALLGVPAADRSRFRRWAGDLTGILEPEITPEELAGADAGADELRDYF  
TGLIEQRRRAPADDLTALVQAHDADGDRLSGEELLANLVLLVAGFETT  
TNLLGNGLVLLTRPEAAALRDEPD LAPGYVDELLRYDSPVQLTTRTVR  
ESVSFAGTELPADSWLLVLLGAANRDPRRFPDPARFDPGRAQSQPLSFGA  
GPHYCLGAGLARLEAQVAFPLLLRRLPELALAGRPSRRTRTLRLRGYETLP  
ITVGAVTADRGTAGVAPGTP

>CYP105CT1 (2517934926) *Salinispora arenicola* CNX814

MNSPNHMPADRSLTAPTSGCPMALSRGRVGLDVADEIGELRDGGRLGRIT  
TAFGQEATLITRYDEVRAQMADSVVFNVAGVSPPALVDGGFDTESVRRR  
RTVGNLIMLDPPEHTRLRRMVAAWFTTRRVERLRPRVVEIIDAALDEMER  
SGPPVDLVAMFAKTVPITVICELIGVPEELRERYRRRAERAVSASAVSTP  
LDELRLREAGWVSRELIEYHRENPSDDIIGMLLREHGTD SHDDGITDDE  
LVGLANALLIAGHETTTQMLSMGTLALLRHPDQLALLRDDPSIVAGAVEE  
LLRYVGVLHGGFVRVATRDTRLGGHRIHAGELVVPALTAANRDPRLTLDG  
DRLDITRPPTSHVAFGHGVHFCIGAPLARMELREAFPALLRRFPGLRLAV  
PDSELEFTQGTTVYSLRGLPVTW

>CYP154M5 (2517934942) *Salinispora arenicola* CNX814

VEQSCPYKLDVTGRDVAEAGEAIRARGPVAQVELPGGVQGSVGTGYQAAR  
QVLADPRFAKDPKKWPAYTSGAIPPNWPLIGWLLMDNMTTNDGADHQRLR  
KLVSHGFTPRQVERTRPLIVKIVNDLLDGLSSAGPDEVVDLKGRFATPLP  
ARVICDMFGVPEALRASVLRGAQVNVTTSSISGEEAEANVEQWHRELLELV  
EAKREKPEDMASLLIAAKEEDGSTLTQEEVVGTLHLMLGAGSETLMNAL  
SYAVLGMLSNPGQYEMVRNGTSSWDDVIEETLRAQAPVAQLPLRYATEDV  
AVGGAVIKAGDPVLMGFTAIGRDPVHGETAGDYDITREDKTHLSFGHGV  
HFCLGAPLARLELKIALPALFERFPNMTLAVRPAQLEPQGTFFIMNGHREL  
PVRLGQPATVLA

>CYP105CT1 (2517934926) *Salinispora arenicola* CNX814

MNSPNHMPADRSLTAPTSGCPMALSRGRVGLDVADEIGELRDGGRLGRIT  
TAFGQEATLITRYDEVRAQMADSVVFNVAGVPSPPALVDGGFDTESVRRR  
RTVGNLIMLDPPEHTRLRRMVAAWFTTRRVERLRPRVVEIIDAALDEMER  
SGPPVDLVAMFAKTVPITVICELIGVPEELRERYRRRAERAVSASAVSTP  
LDELRLREAGWVSRELIEYHRENPSDDIIGMLLREHGTDSDHDDGITDDE  
LVGLANALLIAGHETTTQMLSMGTLALLRHPDQLALLRDDPSIVAGAVEE  
LLRYVGVHLHGGFVRVATRDTRLGGHRIHAGELVVPALTAANRDPRLITDG  
DRLDITRPPTSHVAFGHGVHFCIGAPLARMELREAFPALLRRFPGLRLAV  
PDSELEFTQGTTVYSLRGLPVTW

>CYP105BL2 (2517935191) *Salinispora arenicola* CNX814

MSSHSAAPDPETATPLHTLAPELTFPQFERSTPFDPPQAYTELSGRCPV  
APVSMADGKPSWLITSFEGVRTTSLDPRFSSDMSHPGFNRTGKPVDDL  
KDTLGAMDGERHRYRRLMTGELTVRRAKAMRPVITQITDEALDQLAAAG  
PGADLVKHVAFVVPSPRVACHLVGIPFSDYERFTGMAATLMDSTSSADQFA  
ALQNMVSYFDTLVTDREHHDRDDLGHMVRRYLASGELTRDMLIRLAWTT  
MAAGQETTAHMIIGLVAALLRHPDQLELLRREPHLLPGAVDELMRYLPLI  
QFGIPRVAMDDVEVDGQTVTAGEGVVTLPPPLANRDPVFERPDELDVRRN  
ARQHLTFGYGP HQCPAHALARLELEVYGRLLERFPTLRLADSDADLKVQ  
DKDIMYRVSELAVTW

>CYP107FS2 (2517935278) *Salinispora arenicola* CNX814

MPVPQGEQNLTTTEVFADPKALFATLGSRQPLHRISLPDGMFAVLVTGNRE  
ARQALSDPRLVRSITAAAPELHKYHPLASDDYALSRHMLFADPPDHGRMR  
KLVSTAFTRRRVEQMRPRIQQITDDLIDVIAAKGEADLVETLALPLPIAV  
ISEMLGVFPADRSEFERHAEVLGTGINASSGFDIAAAGRWFDEYLAELVQ  
QRRREPQDDLISGMLAAQDKGDRLTDVELRSNALLLSAGFETTVNLVAN  
GLLALLRHPEAMAAALRSEPNLMTTAVDELLRYDSPVSCVTYHFAQEPVEI  
GGFEIRSGEHVVIAAAAAANHDPTVFADPSRLDLRREGSGQILSFSGIHF  
CLGAPLARLEGEIAFGTVLRLAGLTLAVPTDSLWKASFVLHRLERLPV  
TFTPDRAPNPIDSVHTV

>CYP105CN1 (2517935279) *Salinispora arenicola* CNX814

MAAPAPQATQSTTPHPPSYPLPRECPYRPSAGTARLRDAGPVSTVRLYDG  
RTAWLVGTAAEARALLADSRVSNRADFPNYPVMDERHLSMRATREMAREE  
EGGFAAALFGMDPPEHTRQRQLLLPRFTVRQVAARRPAIQRIVDEHLDAM  
EANGSPADLVSAFATPVPTMVVCTHLGVYPYQDRTRFEPVAVAGLFEPDRAD  
AAMAELTAYLHQLIETKQSEPGDGVIDHLIANHLRPGAIDRAELVAIASA  
ILVAGTVTTSSAIALGTLALLTAPGQYAALVDNPDLPVPGAVNEILRYLSL  
VEQLARVATEDIEIGGKLIRAGDGIIVSFAAGNLDPNVTTHPDRLDVALP  
PTNHAFSGHIHHCIGQNALLELDIAFRALVSRFPTLRLAVPAEQLPY

FAGDVPRLACLPVTW

>CYP105CP2 (2517935281) *Salinispora arenicola* CNX814

MTKSMPVQDLPAFPIPRECYPYRPSAQHVSLRSGGPMKVRLYNGRTAWLV  
TDSAHARAVLSDYRRVSIKPYHGNYPLLNEEFKVVDSGYADVLFGVDPP  
EHTRQRMIMPSFTLRRTAVLRPDVQRIVDDKLDEMMRHGAPGDLVTEFA  
QPVPSMVMSFLLGVPWEDHEEFETPAHKLFVPELAEEATELGAYLERLI  
QKKEQPGGTGGTGLLDDLRDHLRAGALSRDELVHIAMAMLVAGTDTT  
NVISLGTALLDNPDQWAALRDDPDELIPGAVEEILRYTSLIEAFARVAV  
SDIELNGAVIKEGEGILISSAGVNFDPALAPDPGRFDIRPPRPSFSFSH  
GIHRCPGDNLARLELEIAFRSLVTRMPNLRRTAKPIDQIPSNNDGTLQRL  
YELPVLW

>CYP1051A1 (2517935456) *Salinispora arenicola* CNX814

MATDAAITRARTVPAWKALPAAVRDTHRAFDVGNWSDGDVVRVSLGVSR  
PYLVTNPAHVQEVLEHERAAIYPRGDDTALWRSVRKLVGDGILAEGDAAW  
SRRVLAPMFRPARINAMVDTMADAIAAGAVDDLHGAATAGTPIDVGRELSR  
IVCSAIMRVFFADIRITVRDALRIMKAQETIVTAMAPRILAPLVPWWIPMP  
GDRRFRAAVRSIDDILLPVLRLQAQRQPDGDDLLSRLVRARADDGRALSE  
KMRDDLVSMVAVTTETSTVVLTWLVPLLANHPDVANRLYDEIDRVVGGG  
PVRGDHLAELTYTRMVLDELLRLYPAGWILPRRAATTDVLGGVRINKGAT  
VILSPYVTQRMATAWWGPTAEAFDPERFAAGREAADGRHRYAYYPFGVGMH  
RCLGEHLFNLEAILIVATLLSRFRFALTDTSMPGVKVAASTRPARTVEMI  
LKPVAPVPAR

>CYP105G5 (2517935481) *Salinispora arenicola* CNX814

LTIETTETPPADDSLAPLPRQFMQRDDPSKLPPALAAAEQSPVGRSTL  
PDGDPFWMVSGYDEARAVLSDPRFSSDRFRYHPRFKKLSGELGERLRNDK  
ARAGSFINMDPPEHTRYRKLLTGQFTVRRMRQLTVRIEQIVTEQVDVMLA  
EGNSADLVSAFAVPVPSLMICELLGVRYEDRTEFQRRRAAGLLQTDLPKQ  
AVENLEAQRAFMRQLVTDKRRTPADDMISGLVHHAGAEPPLTDELVGIA  
TLLLFLAGLDTTASMLGLGMFMLLQRPEQMAVLRDDPSRIGDAVEELLRYL  
TVVSTGLFRFAKEDVVLGDEHIPAGSTVVVSLMAANRDGRHWPEPETLDV  
TRVRSSHLAFGHGVHQCLGQQARIELTVGITELLRRLPNVRLAVPPADV  
PLRNDMITYGVHRLPILWDTF

>CYP107Q4 (2517935482) *Salinispora arenicola* CNX814

MTTTAETSATIDLFSPEVVADPFGWYARLREETGPTTGTNLNIGTMMGGP  
EMWLVTTRYEDVRQVLTDPFRFLTNPADSPLEDIRAGVFKRDLFPDLPW  
MANLLNVSDGEDHTRLRLKLVSYALTAHRIGKLRPRVEKITADLLDKLAED  
GKDGSPVDLVEEYCYPLPVTVICELVGIDEPRPHWRAWGDSMATMNGER  
IPTTLVKCIELARELIAKRAEPQDDLVTALVQAQAEQDQNRVSDDEIIGI  
LFSLVTAGHQTTTYLIGNSVILLLENPDQLARLKENPSMWPQAVRELQRL  
GPIQFAQPRFPSEDIELGGVTIPRGAPVAPLLLAANTDPRRFPDPNKLI  
DRLAVGSEHGLGFGKGIHRCGLGQHLAYQEAEEVALQGLFTRFPDLSLAVPR  
EEIPWILRPGFTTRTLPLKLV

>CYP211C1 (2517935992) *Salinispora arenicola* CNX814

VVDVEELLTRYLSAQGRQDPFPVYADLHAQGPIAALPPEPERHRVAAVAV  
GYDLVGAVLRDPEWSKAPPPGWTEQEILRTLQTSMMFINPPDHGRMRHVF  
AGTFTPRRLGALEPVVNRVADELLDRMADAGAGGLDFVAEFAYPLPARVM

AEFIGIPETELDWYRERVDVIDAFLDVAGKTPQRLAAANAAGAE LRAFYG  
ELLARRRRTPGEDLISGLVEAVDAGGVELTEDELVSNLIVLFNASFVTTV  
YMLSNGLPVLLAHPEVAAALATDPVLTAGAVDEILRLQAPVHLLARAAPR  
DTVLGGVPI PQGQNVLLLLIAAANRDP AHFPDPDRFDPWRS GPPSLAFGLG  
LHYCLGAAVSRLEGR LALPRLLSRFPRLRIMEQP VYSGSLFLRGIDKLSV  
SPGEGSTRE

>CYP105AB8 (2517936245) *Salinispora arenicola* CNX814

MTETASSRLTDTEFPVQRECPFAEPVEYEQIREQSSIAMVRLTGGGEAWW  
ISGHEQGRAVLADRRFSSDRKANFPFVSTDPAIRKRLHAQPLSLISMDG  
AEHTQARRALIGEFTVRR LAAALRPRIQQIVDQC IDEMLTTDQHCADLVKA  
LSLPVPSLVICELLGV PYADHDFEQEHTATLVRRNTASEVRQHS IDELNA  
YLGALIDRKLASPD DDLGRQIARQHRDGT FDRSSMVSLAFLLLVAGHET  
TANMISLG VVGLLQHPEQLAMIKNDPKTPLAIEELLRFFTIVDSVTSRV  
ATEDVRF GDTTINAGDGVVVSGLSADWDPTVFADPDRLDLERGARHHLAF  
GFGPHQCLGQNLARLELQIVFDTLFHRIPTLR LAAPLDKIPFKTDAAIYG  
ARELPVAW

>CYP1005A1 (2517936503) *Salinispora arenicola* CNX814

VSAVLFRSWTKTAGTRWPDVTRVADQSGTEHLVVTRHALVRQVLT DQATY  
RPDNAL EAVTPI PVAALRVLAGHRFRLPPTLANNGGVSHPAIRALVADAL  
HPTKVAAQR PWTGLVADRVASIRTTLDSGGPVDLYADLTADL PLLVLAR  
LVELPDAPVNAV KQFARA ALELFWAPLDADRQLALADEVGRF HQVLR EFA  
DTGGGLAAALRATGHSPDVLVGALFFLLVAGQETTSQFLTLL LHRLSGEP  
TIRAALRAGSISVADVVEEGLRLEPPIV TWRRVAAVDSTLGGTTVAAGTS  
VLLWLARAGRDP AVVAAPDEF RPGQRGSRRLAFGAGAHRC LGDQLARME  
AAVVVEQATPLLDGVT VVRPPWYPDNLTFRMPDAFVVR

>CYP105J3 (2517936585) *Salinispora arenicola* CNX814

MTDSVAFPQGRVCPHQ PAPGYRPLAVQRPLAQVTLYDGRRVWAVTTRDLA  
RRLLVDPRISSDR TNPAWPAIVPIVAAAVNDAQQKVLKIATALVGT DGPE  
HKAQRKMLIP SFTFRMNALRPMIQEIVDQQLDEMIKSGAPTDLIPAFAS  
AVPVTVLYRLMGIPDDDHGIF EKLSHQLLAGPNANEAYDQLMGYMSRLIA  
ERRRNPEGVLD DDLAQHGANDDADHDELVSTLVVQVAGNHGTTGSMIAL  
GLFALLQHPEQLAELRADPSLMPTAVDELLRFLSVPD AVTRLAADDIEVE  
GTIIRKGDGVFFITSLINRDTDVHDAPNSLGWHHSAADHLTFGFGAHQC  
LGQSLARITMEIALGALIDRLPGLRLAVPAEEVPFLPAASLQVIAELPIT  
W

>CYP105W2 (2517936752) *Salinispora arenicola* CNX814

MTGYQDRPTGDQPGAPVPSRSTDPGIGAFPLPRRCPFSPPAEYARLRAEH  
PVVRLPMLGGDTAWVVS R HSDVRQVLSDPRMSADRRRP GF PKFAPTTEGQ  
RQASFANFRPPLNWLD PPEHAICRRQIVDEF SVRRVRQSRALVERVVDTH  
LDALTAAPGADLVSTFAYPVPSQV ICEVLGV PYGEHEFFERRSTLMFRR  
STPADERARCAREIRD FLDVVVTDKERRPGDDVLSRLLYRQRSAGGMDHE  
AVVSMAFVLLVAGHVTTSNMLALSVLALLTHPARLARLRAE PERFPAAVE  
ELLRYFTVVEAATARTTTAEVTIGGV TIAAGEGVVALGQAANRDP RVFEH  
PDEFDPDRDARAH LAFGHGRHICPGQHLARLEMEVALSRLFRRLPGLRLT  
MEVSDLPLKEDSNIFGLYALPVAW

>CYP248A2 (2517936759) *Salinispora arenicola* CNX814

VLADAVTAFDPTAVDVRRDPYPSYHWLLRHDPVHRGAHQVWYVS RFADVR  
AVLGDERFARTGIRRFWTDLVGPGLLSQIVGDIILFQDEPDHGRLRGVVG  
PAFSPSALRRLEPTIEATVNDLLRPARALGAMDVVADLAYPLALRAVLEL  
LGLPAGDANAVGRWSRAVGRTLDRGATAEDMRRGHAAIAEFADYVERALA  
ERREDGADLLALMLAAHRSQLMRNEIVSTVVTFFIFTGHETVASQLGNGL  
LSLLDHPEQLELVRRQPHELLPHAVEECLRFDPVQSNTROLAADVELHGR  
RLRRDDVVVVLAGAANRDPGRYDRPDEFDIRRDPVPSMSFGAGMRYCLGS  
YLARLQLRTALGAMVALPDLRLVCSPNELAYQPRTMFRGLTRLPVAFTPA  
G

>CYP107AX4 (2516042149) *Salinispora pacifica* CNR894

MTSQPAPVFDQLLLLRDPHRRYNALRDEAPVHHIRTPDGAPAWLVTRYDDV  
RAAFIDPRLSVDKRLSSTDGEHGSSLPPELDAHLLNRDPPDHTRLRLRLAA  
AAFTPRRVADLRPAVERIVSTLLDGLVGHDAQEELIGSLASPLPLQVMQEL  
LGLPTQTSVDFRRWTNTLLSADANQPAQSRSAMANMRRLVEQLAHKRAR  
PGDDLTLGLLAAREDDRLTDDELVAMLFLLMFAGYDNTAALIGNVVHAL  
LTNTELPAAVRTGSLALDELVDGVLRWNPSFPLAVRRFAREPITIAGQTI  
PAGDRIWLCLASANRDPAQFTAPDTLGTGMRRPHLSFGHGIHYCLGAPL  
ARLQTTVAVTILLDRFPGIRLAVPAHDIRWRESFRLRGLVALPVFL

>CYP107AW7 (2516042164) *Salinispora pacifica* CNR894

VETVTGTSTPPPVPIADPYPTLARIRANGPVSIHLSDEGIPMWVIARYR  
DVRAALADPQFGQDARRAQALADNRVAGVTLGGDIVHMLNSDPPDHTRLR  
RHVQGAFTARRVAAMRPLVERITTSLLDGLTGRTTVDLVQDFAFPLPMLV  
ICELLGFPAEERNAYRSWSTAILTHDDDPAAFATALREMTDYIAVQLRIR  
QTRPGDDILTELLAARDAGQLTDDEIIGMVFLLLIGGHETTNNLLGTATL  
ALMRNPDQHRWLLANQHALPEAIDEFLRYESPVAMATLRFTTTPVAVDDV  
VIPAGELVLVSLGGANRDPDRFPDADRLILDRDRTGHLLAFGHGLHRCLGA  
FLGKLEGEVALGALLRRHPRLALAAEVRQLRWRDTIMLRGLESPLVSLHG

>CYP211B11 (2516042475) *Salinispora pacifica* CNR894

MDASEAVALLTSPPGRLDPYPTYERLRAHGPVVSTAAGFFVVTGYTEADT  
VLRNPRFEVMDDEERDGVFPHWQDSPAMISISRSMIRANPPDHSRMRRLA  
AGVFTPRRVAALREVVAQAADGLVDEMIRAGRGGAAVDFMGSFAYPLPVT  
VICALLGVPAADWARFRHWASDLTGVLPEEITPQELAIADAGASELRDYF  
TELIAQRRRAPADDLTALVQAHDADGDRLSGEELLANLVLLLVAGFETT  
TNLLGNGLVVLTHPDSATALRGQPELAPGYVEEFLRYDSPVQLTSRTVR  
ESVSLAGVELPAGSWLLVLLGAANRDPARFTDPAFDPARRAQSPPLSFGA  
GAHYCLGAGLARLEAQVAFPLLLRRLPELALAGEPTRRHRLTLRGYETLP  
VTVGAVPADPGTPAGVALGTP

>CYP164C2 (2516042792) *Salinispora pacifica* CNR894

MTARAGSVAEDIIQLADRMGREDPYVPLHRMRQASPYVALPGLVVAGTHA  
TCSAVLRDPGMSSERQRATLAPAARGPRTRNFLHLDPPDHTRLRLRLVSKV  
FTPRVVATMEPHIRRTTDDLLTAAAARGSMEEVVADLAYPLPLRIICEVLG  
VPAEDHHLVQHWSARLSEALEPPIPGLVSTTTSTEAARARAGFIAFYQAL  
IADRRRSRPRADLVSQLVAVEDASERLDSSDILATCILLINAGHETTNNLI  
ANGVLALLRHPEQLADLRAEPGLAAATVDEVRLRYDAPVQITSRVAKHDTR  
LGAADVVRAGDMVLLVLLGAANRDPVYPPDPDRFDIRRRSPVPHLAFSAGAH  
FCLGAGLARLEAQIALSAVAARLREPRLRAGGVSYKPNLSLRGPDVLTVD  
FDDVLAPGRRDQGEANG

>CYP208A22 (2516045087) *Salinispora pacifica* CNR894

MTVIADRGGRIPPGPPVTAGLRLLLLALGRDRLGMMTSAAAEEYGDVARLPV  
GPKKLYFFNHPDHAKHVLADNHANYQKGIGLVHARRALGDGLLTSEGELW  
RKQRRVIQPAFQNRRLAQYAGAVGQEATRLVARLATRVDPGPVDVLDEMT  
RLTLGVLGRTLDDAELTGFGHVGESFAAVQDQAMFELETINTVPTWIPLR  
RQRRFRRARQHLQEVVDVLA AERGQAVEGRDDVLSRLILSTRAEADPQLG  
RERLRDELVTLLLAGHETTASTLGWSLHLLDQHPELRERVRHEARTVLGD  
RVPAYEDLHQLRYTAMVVEEAIRLYPPVWILTRKARAEDEIGGYRVPAGA  
DILICPYTLHRHPRFWAEPERFDPERFDP SRITDRPRYAYIPFGAGPRFC  
VGNNLGMLEATLVLA VLLRDLRLLEGLPGRAVVPEPMLSRLVRGGLPMTVR  
RVD

>CYP124M3 (2516045108) *Salinispora pacifica* CNR894

MTVPIELDAVDLSDNDFWTKPLEYRHAVFNALRAQPGLPHFASPEFGSAP  
RGRGYYALTRMDDVLAVSRNPSVFISGKGNVAMEVPAEFLDQSLITMDNP  
RHARLRRIVSRGFTMKAVTALMDNASQMAKQIVDEVVERGECDVAVDISA  
KLPLGIIICNMMGIPDSQQQFVFEQTNVMLGVQDPEYVGEQNDAMLAMSV  
SQELADLMHELATLRAKNPTDDLISKLLSAEVNGEALTPSELAHFFILLT  
GAGTETTRNAISWGIQLLTQSPEQREAWLSDIDGVTPTAVEEIVRWSSPV  
ISQRRTVAEADAEPVKLAGQLLGPDKVLMFYGAANRDPNYFVHPEGFDVR  
RSPNPHVGYGGPGPHFCLGAHLARLEISVMFRELLTRIPDIHATGEPARL  
KSPLINGIKRLPVAFTPGAR

>CYP161N4 (2516045227) *Salinispora pacifica* CNR894

VNTVAQLPFTQTHVLDVAPALRLLQSRGKVHRVRTPEGVPAWLVTGHAEV  
QQLLDDDRLSRSDPGGRDGGTALLNKLLGPLADDDHPRLSLLEPQFTPER  
LEPLRAVVEKLTEQHLDELATRTPPVDLRPTLAMSLPILVLC EWLGVP AE  
DKGRFSVWTQDAAGVQDPERSQRLAELFGYCRQLVAAKRQDPGDDVISR  
LIATAGIGDTEVVALTALLLFGGYETTVARIGTGVL LLLTNPDQWAAVRA  
DPALVPATVDELRRSMPNPHNGGMPRFAVTGFEIDGAAIRAGDLVLLNI  
IAANHDETAFPDPDRDLITRPTAGSLAFGYGRHSCVGAPLARMVLRVALS  
RLITRFPDLRLAVGVDELKLRHETLVGGLVELPVWTWGPR

>CYP2054A3 (2516045233) *Salinispora pacifica* CNR894

MSISADSEQVQGRFPDPYGAHRDDPYTFLAGLGVFYAPLLDAWCVTTRRED  
MVAVLRDDRSFSARDHNPRPAVALPDDVNQMFRTWRGAGAVAVGSLDPPA  
HAKIRDVLNIGFTPARVRAFEPTMRAVAADLADRIGDAPEFDFIADFVAP  
FALEVIGRRLGVPDDYLDRCRTWSEQRIELMMAQGDADHDRLREFARGLM  
EFGEFARSLVRDRMADPRDDLISELLHDGKAGRTLTADEVAVQIPTLIFA  
GHMTCAEALGTIFYQQLRSPGGWARVVDRTIPVGD LVEEGLRFDSPLAGM  
YRTATRDVTVGGIRLTAGSRLLLLYGAAGRDSRAHACPAAFRPGDGSSGH  
LAFGHGHIHFCLGAGFARAELRVAVEVLAARMPDLGLAPGRPPRFRPVFPL  
RALTEL RVTRSGGSGP

>CYP107FH3 (2516045238) *Salinispora pacifica* CNR894

VPIELDEAFVQDPYAVYEKLRAEGPAHRVRMPGPVPLIGGLPVWLITGYD  
AVRAALADSRLSTDLHRIDGLFAQKDPDRSHRGGFSSALASHMMHTDPPD  
HTRLRKLVSKAFTTRAIEALRPRIQQTDELTAELAGHDTV D LLD AFAFP

LPIRVICLLLGVPVAEQENFRSWSRALVSGHSPEAAATAATEVAAYLGDL  
VERKRHATTDVLTALVAAHVDVDDRLTHTELVSTAYLLFIAGFETTLNAL  
GNGTLHMLHRDQWTALRADRALLDNAVEEFRLRESPLKHATFRCATESL  
RIGDAEIAAGDFVLLAIASANRDPRRFPDPHTLDVRRPAAGHLAFGHGIH  
HCLGAPLARVEVRMAFDALLDAFPDMRLATDPAGLRWRNSTIIRGLDSL  
VHLHN

>CYP1005A6 (2516045434) *Salinispora pacifica* CNR894

VSAVLFRSWTKTAGTHWPAVTRVADQQGTEHLVVTEHALVRQVLTQV  
RPDNLDAVTPIPVAAALRVLAGHRFRLPPTLANNGGVSHPAIRALVADAL  
HPAKVAAQRPWLTELVAERVAAIRATLDSGGSADLHAELSADLPLLV  
LVELPDAPVSAVKQFARAALFWAPLDADRQLALADEVGRFHQVLR  
DTGGGLAAALRATGHPPDVLVGALFFLLVAGQETTSQFLTLHRLAGEP  
TVRAALRDGSVSVPNVVEEGLRLEPPIVWRRVAAVDSTLGGTAVPAGTS  
VLLWLARAGRDPATVSAPDEFPRPGQGRSRRHLAFGAGAHRCCLGDQLARME  
AAVVVERVSPLLDGVTVVRAPWYPDNLTFRMPDAFVIRRGFAGAAER

>CYP107AY9 (2516045542) *Salinispora pacifica* CNR894

MSQDQPTRAELAPIPRSGARIGPEYDQLRKTDGVHQQVLLPDTSM  
PDLVSRALADPRLALNRKHSRGGWSGFALPPALDANLLNDAPDHTRLRR  
LVGPAFSPQORVAALRPRIQRTAEELAETMVATGSPVDLVTGYCTPLSVQV  
IADLLGVDPDAGRTDLRAWDTMLTSYPPDRDAIRQAVVELHGYVNNLIEA  
KQQRPGDDLLSALVATEQEGDRLTRDELTSALFLILFAGYENTANLI  
ASTVLRLLDHGSLRGVRVSEAIEETLRLEPPAPAAIRRFPTTEMTIGGATIPA  
GDTVLLSIAAATRGADGNPARLAFGNGPHYCLGAALARVEAEEAITVLAR  
RLPGLALAVPGAPVRWRPTFRTHGPAELLVAV

>CYP244A10 (2516045562) *Salinispora pacifica* CNR894

MQDTAQANLAEAPEVRMPIELRPTDCLPELLAAARVAPVVRTPYLDQHAW  
VVCDELVKQALTHPKLGKDVALAPDWMRQPGQMTAMPPEYARMVMS  
DGEHHARIRRIHAPVLSRPNTERWSEVAALVDGFLDNLDSADGTEVNLI  
TDYTHKIPLAFTAEMGLPPGAERRLHDITEVMLYSADYALRQQAVGELF  
EAVQEWVRDPAGLRDGVITGLLASADGPDATVTKGEAIVWTLSLIINGYE  
TTGSLISAALYEALRRPARERPHTDEAVAAWIEETLRVQPPVPHTTW  
RFA LADLDLGGYLIPRGAPVQISLAAANLDPDEDADSFDAQRRGRGHL  
SFGLG AHYICIGAPLARVQTKIALRGFLRRFPQARLSLDTAPRWESEWMIRMSVL  
PVLLA

>CYP125A65 (2516045605) *Salinispora pacifica* CNR894

MTEPRIPVGFDFTDPAVLERRVPREEFAELRRTPVWWNVQPRGSAGFDD  
DGYWVVTRYADVMAVSRDSEYSTRENTAIARFQPGTTQADREMQRVIMI  
NVDPPHETKLRAIVSRGFTPRAINALRGSLAERAERIVRDAAVRGTGDFV  
TDVACELPLQAIaeligvpqhrrkvfdwsnqligyddpaygvdpmaaaa  
ELLAYAMEMANERQRNPSDDLVTQLVNAQIDGHELTDEFGFFVMLLAVA  
GNETTRNAITHGMLAFLEHPDQWELFKAERPRSAVEEIIIRWATPVNVFQR  
TALVDTTLGGQAITAGQRVALFYGSANFDESVEEPPERFDITRSPNPHLG  
FGGSGVHFCLGANLARLEIELIFNSIADHMPDIRKVADPQRLRSGWINGI  
REMPVRYR

>CYP105AB28 (2516046733) *Salinispora pacifica* CNR894



MTETASTTTPGISSTTTSGPASGEVTDAEFFPLERGCPFGTPTEYEQIREH  
SPLAKVRLTTGREAWWIAGHELGRAVLADRRFSSDRRRDNFFVSTDPE  
RKQLQDQPTSMLGMDGAHAQARRALMGEFTVRRMAGLRPRIQQIVDQHI  
DEMLSSDQRTADLVEALSPLVPVSLVICELLGVYPYADHDFQARSGLIRH  
TTPTEVRLRIQKELNTYLALIDRKVADPTDDLLSRQIAKHHAAGTFDRT  
SLVSMAFLLLIAGHETTANMISLGVVGLLQHPDQLAMIKEDPEKTAPAVE  
ELLRYFTIADTVTARVATEDVQLGGTTINAGDGVVISGLAADHDPTVFTD  
PDRDLERGARHHVAFGFGPHQCIGQTLARMELQIVFDTLFRRIPTLRLA  
APLDDIPFKSDAFVYGAERLPVAW

>CYP107E37 (2516046876) *Salinispora pacifica* CNR894

VTIDQEIREYPPFRESRGIGIDPTYELLRRTEPLARVQLPYGEVSWLVTRY  
EDVKTVLTDPRFSRAAAQGKDQPRTRAEMTYEGIIGLDPPDHTRLRLRLAG  
KALTARRVNAIRADAQRIANEYVDEMIAGKSPGDLVELFALPYPTVICE  
LLGVPFEDRAQFRIWTEGLTSTSEQLMVYAEQLFDYMGKLVAQRRAEPTD  
DLLGALVKARDEGDRLTEQELLSIAGVGLLLTGVEVTVSTHINPFIYALLT  
HPELMAQLRADRSPLVPAAVEELLRMIPLNPAAMFPRYAVEDVTLSGITVR  
AGQPVLVSLPGANRDPEVFENPETFDFTREQNPHVAFGHGPHHCLGAQLA  
RMELQVALHTVLDRFPDLRLADGDEGVSWKSGLLVGRPSRLLVGW

>CYP125A15 (2515750343) *Salinispora pacifica* CNT150

MTEPRIPVGFDFTDPAVLERRVPREEFAELRRAPVWWNVQPRGSAGFDD  
DGYWVVTRYADVMAVSRDSEYSTRENTAIARFQPGTTRADLEMQRVIML  
NVDPPEHTKLRAIVSRGFTPRAINALRGSLAERAERIVRDAAVRGTDGDFV  
TDVACELPLQAI AELIGVPQHHRKVFWDWSNQLIGYDDPTYGVDPLTAAA  
ELLAYAMEMADERQRNPSDDLVTCLVNAQIDGEHLTTDEFGGFVMLLAVA  
GNETTRNAITHGMLAFLEHPEQWELFKAERPRSAVEEIIRWATPVNVFQR  
TALVDTTLGGQAI SAGQRFALFYGSANFDES VFEEPD RFDITRSPNPHLG  
FGGSGAHFCLGANLARLEIELIFNSIADHMPDIRKAAEPQRLRSGWINGI  
REMPVRYR

>CYP211C8 (2515750468) *Salinispora pacifica* CNT150

VLDVEGLLARLYSAQGRQEPYPVYADLHAQGAIAALASRPERQRVAAVAV  
GYDLVASVLRDPEWFKQPPPDWTEQEILRTLQSSMMFINPPDHGRMRHVF  
AGTFTPRRLGALEPVISRVTDDELLDRMADAGPGEVDFVAEFAYPLPARVM  
AEFIGIPAAELAWYRERVDRIDAFLDVAGKTPERLAAANVAGAE LRAFYG  
ELLAHRRRTPEGEDLISGLVQAVDSGGVELTEDELISNLIVLFNASFVTTV  
YLLSNGLPVLLAHPEVAAAMADDPELAAGAVDEILRLQTPVHLLARAAPR  
DTVLGGSVIPQGSVLLLI AAANRDP AHFPDPDRFDP RRS GPPSLAFGLG  
LHYCLGA AVSRLEGR LALPRLLSRFPRLRILEQPVYSGSLFLRGIDKLSV  
SPGGREHP

>CYP105AB24 (2515750794) *Salinispora pacifica* CNT150

MPETASITTTGTASTATTGAASGKVTDAEFFPVARGCPFSTPAEYEQIREH  
SPIAKVRLTTGREAWWIAGHELGRVTLADRRFSSDRRRDNFFVSTDPE  
RKQLQDQPTSMLGMDGAHAQTRRALMGEFTVRRMAGLRPRIQQIVDQHI  
DEMLSSQRSADLVEALSPLVPVSLVICELLGVYPYADHDFQGLTGPLLRLH  
TTPPEARGRIQEELNTYLGLTIDRKLTDPD LLLGRQIAKQHAAGTFDRT  
SLVSMAFLLLIAGHETTANMISLGVVGLLQHPDQLAMIKNDPEKT PPAVE  
ELLRYFTIADTVTARVATEDVQLGDTTINAGDGVVISGLAADHDPTVFTD  
PDRIDLERGARHHVAFGFGPHQCIGQTLARMELQIVFDTLFRRIPTLRLA  
APLDDIPFKSDAFVYGAEKLPVAW

>CYP1005A6 (2515751047) *Salinispora pacifica* CNT150

VS AVLFRSWTKTAGTHWPAVTRVADQQGTEHLVVTEHALVRQVLT DQVTY  
RP DNALDAVTPIPVAAALRVLTGHRFRLPPTLANNGGVSHPAIRALVADAL  
HPAKVAAQRPWLTGLVAERVAAIRATLDSGGSADLHAELSADLPLLVLAR  
LVELPDAPVSAVKQFARAALFLWAPLDAGRQLALADEVGRFHQVLRFA  
DTGGGLAAALRATGHPPDVLVGALFFLLVAGQETTSQFLTLLHRLAGEP  
TVRAALRDGSVSVTNVVEEGLRLEPPIVTWRRVAAVDSTLGGTAVPAGTS  
VLLWLARAGRDP AIVPAPDEF RPPGQGRSRRHLAFGAGAHRC LGDQLARME  
AAVVVEQVTPLLDGITVVVRAPWYPDNLTFRMPDAFVIRR

>CYP244A5 (2515751655) *Salinispora pacifica* CNT150

MSVTTNAELGEAPETNMPVDPGLFDCLPDLIAAARIAPVVRIPYLGRHAW  
VVC DRELVRQALTHPKMGKDITLVPEWMMRQPGLMVTAQPPPEYARAMIMS  
DGENHARIRRIHAPVLSRPNTERWGEQVADKVEGF LDELGQAASGGNAEV  
DVVTNYTHKIPLAFISEMLGLPPEAEHRLRSITDIMLYSSDYAARREAIG  
GLFGAVEEWVRDPAGLRDGVITGLLAASDGPAAVTEGEVIVWTLGMIIT  
GYETTGS LISTS LYEALRRPPHERPKTDEDIAAWIEETLRVHPPFPHPHTW  
RFPLEDIELGGYLIPKGAPVQVSIAAANRKPDEGADSFDAERRGHGHLSE  
GLGMHYCIGAPLVRLEAKIAVRGFLRRFPRLRSADTAVQWESEWMIRRM  
SLLPAVLS

>CYP245A13 (2515751659) *Salinispora pacifica* CNT150

MPSATLPRFTLTGWARED IINPYPVYQRYREAAA VHRGEASGDAPETFYV  
FSYDEVAQVLSSNCFGRGRSLDAAAAAVPVPTDQKALRAIVENWLVFMDP  
PRHTEL RALLNRSFSPRIVTGLRPRIARIAQELLTRLGQQVETDLVAGFA  
APLPILVIAELLGIPAERHGWL RANAMALQEASSSRARRD VDG YARAESA  
AQEFTEYFREQVYLRRGSTGDDLMTILANAQLRGAPVGLEAVVGTCVHLL  
TAGHETTTNSLAKAVLALRAHPAVLEELRSADGLTADSIAEFLRYDPPVQ  
AVTRWTHQD TTLGDWEVPRGSRV VALLGSANRDPARFPLPDALDVRRTAD  
RHLGFGLGIHYCLGATLARA ELEIGLQTLLDGLPALDYSVQYVDYADDMV  
FHGPSRLLL VNPGERFCS

>CYP154M18 (2515751733) *Salinispora pacifica* CNT150

MHETCPVLDTAGRDIHGESDRLRQRGA AVKVKLPGGVLA WAVTGHS AIKK  
VLLDPNVTKNARAHWPAFINGEIPMDWELISWVAMDNMVTAYGAHLLQLR  
KLSAKAFTPHRVEMMRPRVVALVNQLLDDL TAGGDEVVDLRERFCYPLPA  
LTVADLIGMSEEHRQQ TAKAMDMVD TTVTPAQ AQETLAGWRGAMAE LIA  
EKRRNPGEDIASDLIAARD DENGAKLTDTELTDTIFAILGAGSETTINFI  
DNAVTALLSHPDQLAMVRSGQISWAEVIEETLRVECP LGS LPLRYAVTDI  
ELEGVTIPKGDPILVN YAAA GRDPALHGETAGQFDVTRPDKEHISFGRGP  
HYCLGAGIARMVATVGLSTL FERFPDLALAVPKGELQPLPTFIMNGHRAL  
PVRLGVHRRAAVAG

>CYP208A28 (2515751707) *Salinispora pacifica* CNT150

MTVIA DRGGRVP PGPVPTAGLRLLLALGRDRLGMMTSAASEYGDVARLPV  
GPKRLYFFNHPDHAKHVLADNNANYQKGIGLVHARRALGDGLLTS DGELW  
RKQRRVIQPAFLNRRLAQYAGVV GQEATRLAERLATRVDGPPVDVLDEMT  
RLTLGVLGRTL LLD AELTGFRGVGESFAAVQDQAMFELETLSAVPTWIPLR  
RQRRFRRRARRHLQEVVDVLA AERGQEV EGRDDVLSRLILSTRAEADPQLG  
RQRLRDELVTLLLAGHETTASTLGWSLHLLDQHPRLRERVRHEATS VLGG

RVPVYEDLHQLRYTAMVVQETIRLYPPVWILTRRARADDEVGGYRVPAGA  
DLLICPYTLHRHPRFWEEPERFDPERFDPAGLTNRPRYAYIPFGAGPRFC  
VGTNLGMLEATLVLAVLLRDLRLEGLPGRAVTPEPMLSLRVRGGLPMTVR  
RAD

>CYP107Z27 (2515752057) *Salinispora pacifica* CNT150

MSRTLPCSHLMDPTLIIDDPAGGFSRIRDESPLAHAMVPGVDGPVWLVTRH  
ESVRKVLGDRRFVNDPTNVPGSSTPDLWAHAALAQGVPHYELEHVRSMLO  
LDGEVHARLRLVSRFTMRRITALLRPRMMQLTEELLDLLPAKAEDGVVD  
LVEHFNYVQPISVICALVGVPAADRAAWIRWSRVLTSMESGTIGDAVTGM  
VDNIRALIEQRRAEAADDLLTDLVRVRDADGDRLSEREMITLVITLVTAG  
HDSTGLLLSNGLAALLTHPDQLAKLRADPSLGPQAFDELMRWCSAIVAAR  
PRYATEDVELEDGLVRRGDAVIPVLVSANYDPEVFEDPHRLDITRVHEQR  
RFHHVGFQDGLHYCLGAALAKHEAAIAITALLERYPGLELAVPAQRLRRA  
RLPLTWRLDSLFPVRLGIGG

>CYP247A8 (2515752067) *Salinispora pacifica* CNT150

VRLTPEAGRPVALGSIDLFDPDLLASGDPHSVWDVMRSEAPLHRQVLPDG  
RVFWSVTRYEDVCRVLGDHRAFTSERGTVFQTLGADDIAAGKLLTSTDPP  
RHTEVRRRAIGRLTARAVAHWQDLVRRRAVVRFLPALDGGCWDLAERAQQ  
LPLIIAGSLLGIPESDWEKLVQLTGMVTAPSDPMFGLGSEAATLAIHHE  
IFDYLSDLVRRRRSAGTGGDSLDDHLMTVRAGAGPLPDEEVVYDSYSLIL  
GANATTPHTLSGIVLTLVEWPEQCDKVRADPSLIPSMVEEGLRWTSAAACN  
FMRYATVDTRLTGGTVPAGEAVVAWIASANRDESQFTDPHTFDVTRGENR  
HVAFGFGPHYCIGAPLARMTARIFFEELFRLFWSIEIDGEPQHRLRSNFIA  
GMTHLPVVTRKRAQV

>CYP107NH1 (2515752073) *Salinispora pacifica* CNT150

MTEPVVSLMDPEFWNDPVSAYERLRGSGPLIRMGLPGVPPVWLVTSCEHV  
KSALSDPRFVVDAANVPGHHGPGIVDQMAASGMPDEFRDYMTNMMFTDG  
KDHSRLRLVTPGFSARRIRAMRPRVDQIAGELVESLAEKGSGLIADFS  
APLTTTVICELIGVDRADQAQMGAWMRDYTTGERVVSGRAMVNYTRDLIE  
RRRAEPADDMISAMIRSGDEAGDRLSDAEIIAMALLLINAGHHSTAQFIP  
NAVLVLLDHPEQLARLRAEPGQLPGAMDELMRLANPVPIATPRYATEDME  
FAGVAVRRGEALTGSLEAANFDPERFPAPRQLDTGRDLGRGDGHLSFGAG  
PHYCPGAALARLEGEIALDHLLLRDSLRLAVERDEVYVDVSLGLRMLS  
SLPVRL

>CYP105AH4 (2515752383) *Salinispora pacifica* CNT150

MTLLQAEEKVLTPFFARTEWGTPPPILAQLRQAPPCAVIIPAGAASERRA  
WLVTRYPDVRQALMDPRLSADELLPGAPVRIQVPQEERPSSFLRMDDPEH  
GRLRGMIASQFTARRVRQLVPAVQRRTDLLDAFVAGPCPADLHDAFSRK  
LPTLVIASLLGVPDEDSAFFVEKTRVTLSDQDDPEVSFAAYREMTDYLQQL  
AARKAKEPQDDLMSQLAVNNLAVGDITMDELVGIARLVLVAGHETTNNQI  
ALNILSLLLDPLRAQVLADDGRLLPEYIEEAMRYWSISQDGIVRLVTE  
LVLGEVQMRAGDAVVISIPAANHDPTVFPEPNRIDVTRSPRDHLQWNGP  
HYCQGAPLARLEMVIALRTLFLARLPGLRLATDDVPSLFRRGTVFHGVENL  
PVAW

>CYP211B18 (2515752551) *Salinispora pacifica* CNT150

MDASEAVALLMSPPGRLDPYPTYEQ LRAHGPPVPTAAGFFVVTGYTEADT  
VLRNPRFGVMDDEERADVFPWHQDSPAMMSISRSMIRANPPDHSRMRRLA  
AGVFTPRRVAALREVVAQADELIDEMTRAGRGGAPVDFMGSFAYPLPVT  
VICALLGVPAADWAQFRRWASELTGVLEPEITPEELAVADAGASGLRDYF  
TELIAERRRTPAEDLTALVQAHDADGDRLSGEELLANLVLLLVAGFETT  
TNLLGNGLVLLNQPGSATALRDQPELAPRYVDELLRYDSPVQLTTRTVR  
ESMPLAGVELPAGSWLLVLLGAANRDPARFTDPARFDPGRAQSPPLSFGA  
GAHYCLGAGLARLEAQVAFPLLLRRLPELALAGEPTRRNRLTLRGYETLP  
VTVGAAPADHGTPAGAALGTP

>CYP113E2 (2515752730) *Salinispora pacifica* CNT150

MAAVPRLTFADGGKRVLPWFRMRDDQPVWYDQGTKSWNVFRYADIAQIL  
KDPVTFSSDPGRSMPELAEAEAGSLVAVDPPRHTRLRGLISAAFTPRLV  
EQLAPRVRSIGELLNRAFVDRRVEGEFDIIGDLAYLLPVYVIGELLGLP  
ESDRGYLVRAADIFYAISADDPFDGAYMASMQSTLDELGSYMLDHAERRR  
AKPGDDLISALAHAEIDGERLNDREIRNFALLLLTAGHITTTALLGNTLL  
ALGERQDIMLRWRQGQVDTAILLEEVLRHRTPFTEVYRFTTTEVTIGNQV  
VPGDQLRLWIASGNRDERQFADPDFTFVLGRDSKHLGFGGLGIHYCLGASL  
ARMESSVVLGLLAERTTSLAPAVEALSYYDAPGIFCLRSLPVSYRRT

>CYP107AY6 (2515753296) *Salinispora pacifica* CNT150

MRAELAPIPRSGVRLGQEYDEFKRTGDVHQVLLPDSSSLAWLVTDPELVSR  
ALADPRLALNRRHSRGGWSGFALPPALDANLLNLDAPDHTRLRRLVGPAP  
SPQRVAALRPRIIRRTAEHLLDALVTAGGPVDLVTGYCTPLSVQVIADLMG  
VPEGGRDRLRTWDTMLTSYPPDRAAIRRTVVELHGYYVNLIAAKQQQPG  
DDLLSALVTIEQDGDRLTRDELTSLAFLILFAGYENTANLIASTVLRLLD  
RGGIREARILEAIEETLRLEPPAPVAVRRFPTEEMAIGGATIPAGDTVLL  
SIAAATRGVDGSATRLAFGNPHFCLGAALARVEAEALTVLGRRLPGLA  
LAVPVAQVRWRPTFRTHGPAELLVTW

>CYP244A9 (2515753309) *Salinispora pacifica* CNT150

MQNTAHTNLAEAPEVTMPIELRPTDCLPELLAAARVAPVVRIPLYDQHAW  
VVCDELVKQALHTPKLGKDVTLAPDWMRQPGQMVTAIPPPEYARMVMS  
DGEHHARIRRIHAPVLSRPAERWSERVAALVDGFLDNLDSTAGAQVDLI  
TDYTHKIPLAFTSEMLGLPPGAERRLHDITEVMLYSADYALRQQAVGELF  
EAVQEWVRNPAGLREGVITGLLASSDGPDATVTEGEAIVWTLSLIINGYE  
TTGSLISAALYEALRRPARERPHTDEAIAAWIEETLRVQPPVPHTTWRF  
LADLDLGGYLI PKGAPVQISLAAANLDPDEDADSFDAARRRGRGHLSFGRG  
AHYCIGAPLARVQTKIALRGFLRRFPQARLSADTAPQWESEWMIRMSVL  
PVLLA

>CYP107NG1 (2515753880) *Salinispora pacifica* CNT150

VTIPAGHSAAVCDFPVVQPDRLAVEPLFADLRSRTPIVRVRLPFGGTAWL  
LTRYRDIRAVLASAQCCRAATDPDTPRILPRAGGEGLMSLDAPETHRL  
RGLVTAWFTTRRVESLRPATEQAARQLIADMRGTGRADLVEQFSQKLSAT  
VIGDLLGVPRSDRETFRQWSEALLSSTSYTQTQVQQATAELNNYFGYLID  
QRDSHPDDLVTGLVRNMQAGKLSRREVLALVTDLLVAGFETTAGQLTNS  
VYTLSTIPGAWAWLAADRTRIPAAVEELLRALPLGAGGFRARVTTAPITL  
GGDTRPTTIPAGHVIIAPTIAANTDPEAFDEPLTIRLDRPRNQHLAFGH  
GAHRCLGAPLARMELTTALDELIEAFPSLTAAAPETDLQWKSGLQIRGPR  
ALPVTW

>CYP105AB2 (2515881576) *Salinispora tropica* CNS197

MTETASIAATTRTASGQLTDAEFFVQRGCPFTTPTTEYEQIREESSIAKVRL  
KNGGEAWWIAGHELGRSVLADRRFSSDRRRDNFFVSTDPETRAQLQSQP  
TSM LGMDGA EHAQTRRALMG EFTVRRMAGLRPRIQQIVDQHI DEMLTTPQ  
RSVDLVEALS LFPVPSLVICELLGV PYADHDFQGLTG PLLRHTTPPEVRL  
RIQEELNTYLGTLIDHKLTDPTDDLLSRQIAKHRDNGTFDRASMVSLAFL  
LLVAGHETTANMISLG VVGLLQHPDQLV I IKDDPKTPLAVEELLRYFTI  
ADSVTARVATEDVQLGDTTINAGDGVVISGLAADRDPTVFAEPDRDLER  
GARHHVAFGFGPHQCIGQTLARME LRIVFDTL FHR IPTLR LAAPLDDIPF  
KSDAFVYGIEELPVAV

>CYP163B1 (2515882202) *Salinispora tropica* CNS197

VTAADTGRVSGESQTPAHTVDLADPATFANHDLTGFWQQLRDEEPIHWN  
PPTAGRGRGFWVVSRYADILDVYRDDVTFTSERGNVLVTLLAGGDAGAGRM  
LAVTDGPRHAELRKLLLRALGPRVLAPVCAAVRTNTRQMIREAVTKGEC  
FASDIASRIPMMTISNLLGVPDADRAFLLSLTKTALSADDESISETESAM  
ARNEILLYFQDLMEFRRDHPGEDVVSMLVNSSIDGAPLSDDDIVLNCYSL  
IIGGDETSRLTMIDSVNTLAAHPQQWRRLKDGQCEIDKAVDEVLRWASPS  
MHFGRVAARDTILHGVRIRADDIVTLWHASGNRDERVFHRPEVFDLGRTP  
NRHLSFGHGPHYCIGSYLAKVEISELLIALRDLTSGFETTGEPRIRSNL  
LTGFATMPVRFPVDRAGLARDALDG

>CYP154M1 (2515882257) *Salinispora tropica* CNS197

MRRRCPVVIDPAGTDIHAEGARIRANGSVSQVELPGGVLAWSVTGQQVAR  
KVLSDQRFKSKDPRKHWTDYLEGRIGQDFPLIGWV LMDNLT TAYGSDHSRL  
RKPCANAFTPRRVEALRPAVERAAVELLGELATVSPTESVDLKARYAHPL  
PSRVICDLFGVPEEDREEMLRGGEVNV DTRVSAEEAAAANVERWHQQMLDF  
IEEKRRNPGPDLTSDLIAAQQAEGSRLTDSEMVGTLHIMLATGTEPVKNL  
IGNAVFALLTHPEQLDLVRSGRAGWDDVIQETLRMQAPVAHL PFRFAVED  
VDIDGVTIRRGDPLLNVFAAIGRDPDVHGDTAAEFDI TRADKEHLSFGHG  
VYRCIGQPLALREAEIALRMLFQRFPNLV LAVPPEEVT PQPTFIMNGLDT  
LPVLLKGRA

>CYP208A4 (2515882285) *Salinispora tropica* CNS197

VTVAAAGRTFSGPTGVALLRSLWQLGQDRLGLMTSAARYGDAVRLGVGSR  
SLYFFNHPDHAKHVLADNSGNYTKGLGLVHARRALGDGLLTSEGELWREQ  
RRVIQPVFQAKRVAGQAHAVAEADRLIARLRARRGRGPVNLTDEFTALT  
LGVLGRTLLDANLDAFTTVGAAFEEMQNQAMFEMASMSMVP MWVPLPQQ  
RFRRARRELERIVGRIVADRTARGE GTGADDALSRLIASTRDEPDGVAR  
RRMRDELVTLLLAGHETTASTLGWTFHLINQDPRVRVRLREEAIDVLGGR  
LPEYADLARLTYTKMVVSEAMRLYPPVWMLSRLARDADVVDGYVP PARAD  
VLICPYTLHRHPAFWPEPERFDPERFDPEVTTDRPRYAYVPFGAGPRFCV  
GNHLGLMEAVFVAMVSREFDLVAPVGQPVVAEPMLSLRVRGGLSMTVEP  
VS

>CYP125A15 (2515882364) *Salinispora tropica* CNS197

MTEPRIPVGFDFTDPAVLERRVPREEFAELRR TAPVWWNVQPRGSAGFDD  
DGYWVVTRYADVMAVSRSDTYSTRENTAIARFQPGTTRADLEMQRVIML  
NVDPP EHTKLRAIVSRGFTPRAINALRGSLAERAERIVRDAAVRGTGDFV  
ADVACELPLQAI AELIGVPQHHRKVFWDWSNQLIGYDDPAYGVDPLTAAA  
ELLAYAMEMANERQLNPSDDLVT KLVNAQIDGEHLTTDEF GFFVMLLAVA

GNETTRNAITHGMLAFLEHPEQWELFKAERPRSAVEEIIIRWATPVNVFQR  
TALVDTTLGGQAIISAGQRVALFYGSANFDES VFEEPERFDITRSPNPHLG  
FGGSGAHFCLGANLARLEIELIFHSIADHMPDIRKVAEPRRLRSGWINGI  
REMPVRYR

>CYP211C1 (2515882497) *Salinispora tropica* CNS197

VLDVEGLLTRLYSEQGRQDPYPVYAGLHAQGAIAALAPRPEGQRVA AVAV  
GYDLVGAVLRDPEWSKQPPPGWMEQEILRTLQSSMMFINPPDHGRMRKV  
AGTFTPRRLGTLEPVINRVADELDRMADAGPGEVDFVAEFAYPLPARVM  
AEFIGIPATELAWYRDRVDRIDAFLDVAGKTPERLAAANAAAAELRVFYA  
DLLARRRRTPGEDLISGLVEAVDAGGVQLTEDELINNLIVLFNASFVTTV  
YMLSNGLPVLLHHEPVA AALADDPELTAGAIDEILRLQTPVHLLARAAPR  
DTVLGGVPI PQGQNVLLLIAAANRDP AHFPDPDRFDPRRPGPPSLAFGLG  
LHYCLGAAVSRLEGRALPRLLSRFPRLRIMEQPVYSGSLFLRGIDKLSV  
SPGGRMHP

>CYP107AW1 (2515883103) *Salinispora tropica* CNS197

MESVTSTSAPPPVPYIADPYPALARIRANGPVSI LHSDEGIPMWVIARYR  
NVRAALADPRFGQDARRAQT LADNRVAGVT LGGDVIHMLNSDPPDHTRLR  
HLVQGAFTARRVAAMRPLVERITTSLLDGVGGRQTVDLVQDFAFPLMLV  
ICELLGFPAEERDAYRSWSTAILTHNDDPAAFATALRDMTDYIEVQLRHR  
RARPGEDLLTELLAARDAGQLT DDEIVGMVFLLLI GGHETTVNLLGTATL  
ALVRNPDQHRWLLANPHALSEAIDEFLRYESP VAMATLRFTTAPVTVDDV  
VIPAGELVLVSLGGANRDPDRFPDADRLILD RRDTGHLAFGHGLHRCLGA  
FLGKLEGEVALGALLGRYPGLTLAAEV RQLRWRDTIMLRGLES LPVSLHG

>CYP107AY1 (2515883374) *Salinispora tropica* CNS197

MRAELAPIPRSGARLGQEYDQLRNAGDVHQVLLPDSSSLAWLV TNPKLVSR  
ALTDPRALNRRHSRGSWSGFALPPALDANLLNLDAPDHTRLRRLVGP AF  
SPQRVSALRPRI RTAEHLLDTLVATSGPVDLVTGYCTPLSVQVIADLMG  
VPEAGRADLR TWDTMLTSYPPDRDAIRQAVVELHG YVVDLIDTKRQQPG  
DDL LSALVTIEQDGDRLTRDELTS LAFLILFAGYENTANLIAS TVLRLLD  
HGGLRGVQLPEAIEETLRLEPPAPA AAVRRFPTEEMTIGGATIPAGDIVLL  
SIAAATRGTAGNAARLAFGNGPHFCLGAALARVEAEEALTVLARRLPD LA  
LALPVAQVRWRPTFRTHGPAELLVTW

>CYP211B1 (2515883423) *Salinispora tropica* CNS197

MDASEAVALLMSP LGRIDPYPTYERLRAHG PVVQTAAGFFVVTGYTEADT  
VLRNARLAFEVMDDEL RDDVFPHWQDSPAMKSIARSMIRANPPNHGRMR  
LAAGAFTPRRIAALREV VTAQADELADEMIRAGRDGAPVDFMGSFAYPLP  
VAVICALLGVPAADWARFRGWASDLTAVLEPEITPQELTVADAGASELRD  
YFTELIAQRRRAPADDLT TALVQTHDADGDRLSGEELLANLVLLLVAGFE  
TTTNLLGNGLVLLAHPDSATALRDQPELAPGYVDELLRYDSPVQLTTRT  
VRESVLLAGVELPAGSWVLVLLGAANRDPERFTDPTRFDPGRAQSPPLSF  
GAGAHYCLGAGLARLEAQVAFPLLLRRLPELALAGEPTRRNRLTLRGYET  
LPVTVSAIAADHGT PAGVARGTP

>CYP1005A1 (2515884614) *Salinispora tropica* CNS197

VSAVLFRSWTKTAGTHWPAITRVADQQGTEHLVVTQH ALVRQVLT DQLT  
RPDNALDAVTPI PVAALRVLAGHRFRLPPTLANNGGVSHPAIRALVADAL  
HPAKVAAQR PWTGLVAERVAAIRRTLDSGGSTDLHAELNADLP LLVLAR  
LVELPDAPVSAVKQFARAAL ELFWAPLDADRQLALADEVGRFHQV LREFA

DTGGGLAAALRATGHPPDVLVGALFFLLVAGQETTSQFLTLLHRLADEP  
TVRAALRADSVSVADVVEEGLRLEPPIVTVRRVAAVDSTLGGSTVAAGTS  
VLLWLARAGRDPVVPAPDEFPRPGQRGSRRLAFGAGAHRCCLGDQLARME  
AAVVVEQVTPLLDGVTVVRPPWYPDNLTFRMPDAFVVR

>CYP107AX1 (2515885165) *Salinispora tropica* CNS197

MTSRPTAVFDQCLLRDPHSRYNALRDQAPVHHVLTDPGAPAWLVTRYNDV  
RAAFTDPRLSVDKRFSGTDGEHGSSLPELDAHLLNRDPPDHTRLRLRLAA  
AACTPRRVADLHPAVERIVSTLLDGLAGHDAELIGSLASPLPLQVMHEL  
LGLPTQANIDFRTWTNTLLSADANQPAQSRAAMANMRRFLIEQLAHKRAQ  
PGDDLTLTGLLAAREDDRLTDDDELVAMVFLLMFAGYDNTAALIGTVTHAL  
LTNAELHEAVRGGSLALDELIDEVLRWNPAFPLAVRRFAREPITIAGQTI  
PAGDRIWLCLASANRDPAQFTQPDDELGIIGLRRSHLSFGHGIHYCLGAPL  
ARLQTTIAVTSLLNRFPEMRLAVPAHDIRWRESFRLRGLIALPVYL

>CYP113E1 (2515885307) *Salinispora tropica* CNS197

MMATVPRLTFADGGVSVLPWFQRMRDDQPVWYDQGTGSWNVFRYADIAQI  
LTDPATFSSDPGRMTPELVEEAEGSLVAVDPPRHGRLRALISTAFTPRL  
VEQLAPRVRSIAERLLDRTFVDRGPEGEFDAIGDVAYLLPVYVIGELLGL  
PETDREYLVRTADEFYAISADDPFDGTYMASMQSTLDGLGTYMLDQAERR  
RARPGDDLMSALAHAEIDGELNDREIRNFVLLLTAGHITTTALLGNTL  
LALGERRDVMLRWRHGQVDTADVLEEVLRRHRTPFTEVYRFTTTEVTIGNQ  
VVPGDQLLRLWIASGNRDERQFADPDFTFVLGRDSRHLGFGGLGIHYCLGAS  
LARMESVVEVLAEERTTTLAPAVQGLSYYDAPGIFCLRSLPVSYRRS

>CYP1004B1 (2515885762) *Salinispora tropica* CNS197

MTTSALAPRFDALDPNVVEDPYPEYARLRAAGPLCRLGPGSWGVTREFADV  
TNLQHDPRLGSEFPAGYHEISVGDGPASAFFQRVMLYRDPPDHIRLRLRLM  
SGAFTPAVVRRLRSHIEDLVDELLAPALAAGRMDLVPELAYPLPVRVVC  
LMGIPPESTEDVRHHATNIGRAFTAVVPEQARTEADEAVSWLREHLGALL  
EQRRSHRGDDLRLSRLDAEESGDNLSDAEIVDNTVFSFFAGFETTVHMIT  
TGTAALLAHPDQLARLRADPSLVTTAVDEFWRWDAPIQGTARYVREPIEI  
GGRTIRRGRLVLMIGSANHDERRFAQPDRLDVGRQDNPHVAFGGGAHL  
LGAFLARMEGAVVFDRLARLAVLEPDGPTVREPNTPFRAVASVPVRIGDR

>CYP1004A1 (2515885766) *Salinispora tropica* CNS197

MRANTARPHLSAAFLATKDDPYPAYAELRARGPLTRAELGQWLVTGHGAV  
SALLRDGRLESRMPEYTRLTLGDSPGVDLHRIVLTRTPPEHTRLRRFI  
GRALGTPVVRRLHDRIAAATDALLEPALDRGRLDVVTTELAVPLPVGVVCD  
LIGIPTGDRPAVLTRVTALAKVFDAANLSPADLADINTALPWLHDYFGDL  
LAVRRAGSGGPTLTEMWEEASDRLAVADFVDNMLFLFHAGFETTMGLV  
SNGVAALLNNPEQLGRLRADPALVPSAVEEFLRYDAPIQNVIRVARKPVE  
VAGQKIRAGRTVLLLLGAANRDEEVFADAERLDVGRDPNPHLGFGGGLHH  
CVGTALARLMAVVVFERLVDRVTVLGPAAPAVRRRHASLSYDHLPLAVA  
AR

>CYP125G1 (2515885805) *Salinispora tropica* CNS197

MSTEVVSTGNRADIAPATYAAGVPYAEFARLRRDKPVSWVPEAALWRRS  
GEGRILSQPGFWAVTTHEGVVAASRQPEVFSSGRQGAFLADPRTTADLE  
QARQLLVNMDAPQHARVRKLVTAFTTPRAIRALGDSVTAHARNLVERAVR  
QEEDCVVADLAAELPLLVLADLLGLPREDRHLLYQWSNNLVGFDDPEYGG

GDVEAYRKTFEAFQYALSVAGERRRAPREDLMTLLATSEVDGRRLTDRE  
FCNFWLLLVLVAGNETTRHLITGSVLALVDNPMQRERLVADDTLLPSAVDE  
LLRWVSPIMQFRRTAIVDTELCGTPIAAGDKVVLWYTSANRDAAVFEAPD  
ELRLHRNPNPHLSFGMGPHFCLGAHLARLEARTMLRELAPHLSRFRLTGP  
VVRLESNFVNGVKSLLPGSFTGQ

>CYP107E3 (2515886100) *Salinispora tropica* CNS197

VTIDQEIRKYPFCESPGIGIDPTYGLLRSTEPLARVQLPYGEVSWLATRY  
EDVKTVLTDPRFSRAAAQKQDQPRTREEMTYEGIIGLDPPDHTRLRKLKAG  
KALTARRVNIAIRADAQRIANEYVDEMIAGSPGDLVELFALPYPVTVICE  
LLGVFPFEDRAQFRIWTEGLTSTSEQLMVYAEQLFGYMGKLVAAQRREEPTD  
DLLGALVKARDEGDRLTEQELLSIAGVGLLLTGIVETVSTHIPPVYALLT  
HPELMAQLRADRSLVPAAVEELLRMIPLNPAAMFPRYAVEDVTLSGITVR  
AGEPVLVSLPGANRDPEVFENPETFDFTREQNPHVAFGHGPHHCLGAQLA  
RMELQVALHTVLDRFPDLADGDEGVSWKSGLLVGRPSRLLVAW

>CYP162P1 (2572184259) *Salinispora arenicola* CNS848

MGLPSEVDLADPDLYAEGDPDAEWAWLRAHRPVYRNPAGATAEFWALTRY  
RDALQVYRDPSTFSSERGMVLGVDPVAGDPAAGRMLVVTDPPRHPKLRI  
VSGIFVPRTMHRLEGRVRSVLDQLLHRVVDGAGRCDFVNDVAARLPVAII  
CELLGVPADEQDWMYHLTSTAFGGGDPAGSAEVSASVERAEAYGDILLYYG  
ELAAERRRRPGDDLVTLLVHADLDGEPLDVEDVLVNCTNLIIGGNETTRH  
AASGGLLALAQRPELWRLRETPTAVPTAVEEVLRWTTPGMHVLRATRD  
TEIGGVPIRAGERVVVWNAANRDEDVFADPQRFIDRSPNRHIAFGQGG  
HHCLGAALARLELTILFEEMAKQVTNVRLTGPRRVRSCVLRGIRALPVE  
LVT

>CYP211C1 (2572184357) *Salinispora arenicola* CNS848

VVDVEELLTRLISAQGRQDPFPVYADLHAQGPIAALPPEPERRRVAHAV  
GYDLVGAVLRDPEWSKAPPPGWTEQEILRTLQTSMMFINPPDHGRMRHVF  
AGTFTPRRLGALEPVVNRVADELLDRMADAGAGGLDFVAEFAYPLPARVM  
AEFIGIPETELDWYRERVDVIDAFLDVAGKTPQRLAAANAAGAELEAFYG  
ELLARRRRTPGEDLISGLVEAVDAGGVELTEDELVSNLIVLFNASFVTTV  
YMLSNGLPVLLAHPEVAAALATDPVLTAGAVDEILRLQAPVHLLARAAPR  
DTVLGGVPIPQGNVLLLIAAANRDPAHFPDPDRFDPWRSRGPPLAFGLG  
LHYCLGAAVSRLEGRALPRLLSRFPRLRIMEQPVYSGSLFLRGIDKLSV  
SPGEGSTRE

>CYP125A41 (2572184504) *Salinispora arenicola* CNS848

MTEPRIPAGFDFTDPEVLAHRVPREEFAELRRTAPVWWNAQPRGSAGFDD  
DGYWVVTRYADVMTVSRSDTYSTRENTAIARLRPDTTREDIEMQRVIML  
NVDPPEHTKLRAIVSRGFTPRAINALRGSLAERAHIVRDAAVRGVGDV  
TDVACELPLQAI AELIGVPQHHRKVFWDWSNQLIGYDDPAYGTDPLTASA  
ELLAYAMEMAERQRSPSDDLVTCLVNAQIDGEHLTTDEFGGFFVMLLAVA  
GNETTRNAITHGMVAFLDNPEQWELFKAERP KSAVEEII RWATPVNVFQR  
TALVDTVLGGAISAGQRFALFYGSANFDEAVFEDPERFDITRSPNPHLG  
FGGSGAHFCLGANLARLEIELIFNSIADHLPDIRKVAAPQRLRSGWINGI  
RQMPVRYR



>CYP166A4 (2572184653) *Salinispora arenicola* CNS848

MTDAISFELPWARTDKFDPPAVFDALREQRPLARMRYPDGHVGVIVSSYE  
LVREVLGDPRFSHSCAVGHFPVTHQGQVIPTHPQIPGMFIHMDPPEHTRY  
RRLLTGEFTVRRTSRLTGHVEGVATEQIEVMREHGAPADLVATFARPLVL  
RVLSGLVGLPYGERDRYLHAVTLLHDAEADPAEAAAAAYEQAGAYFDEVIE  
RRRRQPEDDLISTLVGDGELTGEELRNIVTLLLFAGYETTESALAVGMFA  
LLHHEDQLARLRADPTKIDAAIEELLRYLTVNQYHTYRTASEDIELHGEV  
INKGDSVTVSLPAANRDPARFACPAELDIDRETSGHVAFGFGIHQCLGQN  
LARVELRAGLSALLRAFPNRLRLAVPADEVPLRLQGSVFAVKNLPVCW

>CYP208A12 (2572184986) *Salinispora arenicola* CNS848

MTLDTITPRVPLGPPRTAALRMLLVMKRDRLGMLTSAAARYGDASRLPVG  
HKALWFFNHPRYAKHVLADNSANYHKGIGLVHARRALGDGLLTSEGLDWR  
KQRKVIQPAFQSRRIAQQAGMIAEEAFALVERLRARAGAGPVELTAEITG  
LTLGVLGRSLLDADLAGFDSIGDSFATVQDQAMFELETNAVPMWIPLPR  
QIRFERRARRKLQAVVDTLVDGRAGNLADRVDVLSRLILSARGEADPRVGR  
ERLRDELVTLLLAGHETTASTLGWTLSLIDRHPGVWERLHAEAVEVLGDR  
LPEYDDLRLRLRYTVMVVEEAMRLFPPVWLLPRRALAPDTIGEYRVPANAD  
VVISPYTLHRHPEFWPNERFDPERFAPGQAADRPRYAYLPFGAGPRFCV  
GNNLGMMEAVFVIALLCRHLRLTGVPGHRLVPEPMLSLRIRGGGLPLVVRP  
VS

>CYP107AY2 (2572185596) *Salinispora arenicola* CNS848

MTAEPTPIPRSGARLGQEYDQLRKTDGVHQVLLPDASLAWLVTNPEVAAR  
ALADPRLALNRRNSRGGWSGFALPPALDANLLNLADPDHTRLRLRVGPAF  
SPQRVAALRPGIRRAAEHLDDTLVATSGPTDLVTGYCNPLSVQVIADLMG  
VPEAGRTNLRAWTDAMLTSYPPDRDAIRQAVTELHGYYVDLIDIKQQQPG  
DDLSSALVTIEQDGDRLSRDELTSLAFLILFAGYENTANLIASAVLWLLD  
HGGLNVVPSSEAEIATLRHEPPAPVAIRRFPTEDIIIGGVTI PAGDTVLL  
SVAAATRGADGNAARLAFGNPHYCLGAALARVEAEALTVLARRLPGLT  
LAVPPSQVRWRPTFRTHGPAELLVGW

>CYP245A7 (2572185881) *Salinispora arenicola* CNS848

MPSATLPRFALTGWSRENIVNPYPVYQRYREVASVHRGEPGGDAPDTFYV  
FSYDEVVQVLSSNCFGRGRSLDAAKASVPVPAEQKALRAIVENWLVMFMDP  
PRHTELRLSLNRSFSFPRIVTELPRPRIARIAQELL SRLGQQVDVDLVESFA  
APLPILVISELLGIPEERRAWLRANALALQEASSSRAGRDVDGYARAEVA  
AQEFTEYFREQVRLRRRAGGDLITILANAQERGAPVSLDAIVGTCVHLL  
TAGHETTTNSLAKAVLALREHPAVLDELRGAEGLTTDAVEEFLRYDPPVQ  
AVTRWAHQD TT LGGCDIPRGSRVVALLGSANRDPARFPSPDVL D VRRPAD  
RHLSFGLGIHYCLGATLARAELEIGLQALLDGVP T L GYGTQHVDYADDLV  
FHGPSRLVLVNLGERCK

>CYP244A4 (2572185885) *Salinispora arenicola* CNS848

MSTTTNTELTEAPETNMPVDPLGFDLDCMPDLIAAARVAPVVRI PYLGRHAW  
VVCDELVKQAL THPKMGKDIALVPEWMRQPGLMVTAQPDPEYARAMIMS  
DGENHARIRRIHAPVLSRPNTERWGERVADKVEGF LDELSQAGSGGSTEV  
NVVTNYTHKIPLAFISEMLGLPPEAEHRLRGITDIMLYSSDYAARREAIG  
GLFGAVEDWVRNPADLRDGVITGLLAASDGPDAAVTEGEVIVWTLGMIIT  
GYETTGLSLISTSLYEAIRPPHERPKTDEDITAWIEETLRVHPPFPHPPTW

RFPLEDIELGGYLIPKGAPVQVSIAAANRKPGEGADSFDAERRGHGHLSE  
GLGMHYCIGAPLVRLEAQIAVRGFLRRFPQARLSAETAVQWESEWMIRRM  
SVLPAVLS

>CYP105CP2 (2572186311) *Salinispora arenicola* CNS848

MTKSMPVQDLPAFFIPRECPYRPSAQHVSLRSGGPMKVRLYNGRTAWLV  
TDSAHARAVLSDYRRVSIKPYHGNYPLLNEEFKVVDSGYADVLFVGDPP  
EHTRQQRQMIMPSFTLRRTAVLRPDIQRIVDDKLDEMRRHGAPGDLVTEFA  
QPVPMSMVISFLLGVPWEDHEEFETPAHKLFVPELAEEATTELGAYLERLI  
QKKEQPGGTPGGTGLLDDLI RDHLRAGALSRDELVHIAMAMLVAGTDTTT  
NVISLGTALLLDNPQWAALRDNPDDELIPGAVEEILRYTSLIEAFARVAV  
SDIELNGAVIKEGEGILISSAGVNFDPALAPDPGRFDIRRP RPSPFSFSH  
GIHRCPGDNLARLELEIAFRSLVTRMPNLR TAKPIDQIPSNNDGTLQRL  
YELPVVW

>CYP105CN1 (2572186313) *Salinispora arenicola* CNS848

MAAPAPQATPSTTPHPPSYPLPRECPYRPSAGTAHLRDAGPVSTVRLYDG  
RTAWLV TGAAEARALLADSRVSNRADFPNYFVMDKRHLSMRATREMAREE  
EGGFAAALFGMDPPEHTRQRLLLPRFTVRQVAARRPAIQRIVDEHLDAM  
EANGSPADLVSAFATPVPTMVVCTHLGVPHYQDRTRFEPAVAGLFEPDRAD  
AAMAELTAYLHQLIETKQSEPGDGVIDHLIANHLRPGAIDRAELVAIASA  
ILVAGTVTTSSAIALGTALLLTAPGQYTALVDNPDLPVPGAVNEILRYLSL  
VEQLARVATEDIEIGGKLIRAGDGIIVSFAAGNLDPNVTTHPDRLDVALP  
PTNHLAFSHGIHHCIGQNLALLELDIAFRALVSRFPTLRLAVPAEQLPY  
FAGDVPRLACL PVTW

>CYP107FS2 (2572186314) *Salinispora arenicola* CNS848

MPVPQGEQNLTTTEVFADPKALFATLGSRQPLHRISLPDGMPAVLVTGNRE  
ARQALSDPRLVRSITAAAPELHXYHPLASDDYALSRHMLFADPPDHGRMR  
KLVSTAFTRRRVEQMRPRIQQITDDLIDVIAAKGEADLVETLALPLPIAV  
ISEMLGVFPADRSEFERHAEVL TGINASSGFDAIIAAGRWFDEYLAGLVQ  
QRRREPQDDLISGMLAAQDKGDR LTDVELRSNALLLSAGFETT VNLIAN  
GLLALLRHPEAMAALRSEPNLMTTAVDELLRYDSPVSCVTYHFAQEPVEI  
GGFEIRSGEHVVIAAAANHDPTVFADPSRLDLRREGSGQILSFSGIHF  
CLGAPLARLEGEIAFGTVLRRLAGRLAVPTDSL VWKASFVLHRLERLPV  
TFTPDRDPNLIDSVHTV

>CYP125G6 (2572186353) *Salinispora arenicola* CNS848

VPTLLNEHVSYDGA AIAIVDS DGATSWIRLAERVNRWVHLLRAHGLDTGD  
RLACVTGNRRETFEVLLAALHTGVTVVPVNWHLTVTEIGHILSDSGSRVV  
ITEELHV KAVAAAADGTAGPVAGLV LGDREVEGF AAVEPLLAASPAEPE  
GQVCGATMLYTS GTTGRPKGVVNNLFVTGAPYARVGRLCDYARSVLGVPR  
RERMLLDGPWYHSSQLFFALLSLLQGSRLVIRPYFDPAATLKTIDDHRI T  
VTHLVPTQLVRLLRVDALTRQMFSGASLRRVWHGGGCPPEVKRSMIDWW  
GPVLVEYYYGATEGGVVTLIDSAEWLARPGSVGRAVPPSEVVVVDDGGQPV  
AAGQTGQVFFRRRTGNRFHYHNAPEKTQAAYLAPDTFTTYGEVGHVDEDGY  
LFLTGRAQDMIVSGGVNVYPAEVEAALLRHPVVRDAAVIGVADDEFGERV  
VGIVVPETA VDPDDLATHLDAHCRVSLAGFKVPRTYRVVESLPRDETGKL  
RKDALRSKFGWLSGAAMTVPRPATGQPTAHRPDIAHPTTYVSGVPHDEFA

RRRRDEPVGWVAEPVLTRHTAAGRTATRGSGFWAVTRYEDVVAASRRVTD  
FSSAAKGAFLLTDPRTPADLQQARQLLVNMDDPHHARLRKLVTSVFTPRAV  
RGLLASIDAHAAALVAKVVAAGEFDVVTDLAAELPLLVLADLLGVPKQDR  
ALLYGWSNHLVGFDDPDFGGGDIDAYRTAMAEAFQYALNLGVERRARPTD  
DLVSLLANAEVDGTRLTDREFCNFWLLLVVAGNETTRHLVAGTMQALTEH  
PGEARLVEGRVPMESAVEELLRWVTPIMQFRRTATRDTEIGGQAVTAGE  
KVVLYYTSANRDATVFAEPDRLDLGRTPNRQLSFGIGPHYCLGAHLARAE  
LTALLRVMSPHLGSLQLTGPVSRSLASNFVNGVKAMPAVIGSR

>CYP154M15 (2572186378) *Salinispora arenicola* CNS848

MNDKCPFAALDVTGQDLHGEAARLREQGPAVLVELPGGVKAWSINRYEVI  
RELLMDRRVTKNARKHWPFAFIKGEIPPDWEMISWVAMDNMVTAYGKDHVR  
LRKLVGRAFTQRRADALRPQVVALSTKLLDDLGAFTPPGEVVDLRERFAYP  
LPAMLVASLIGMSEAALAACSKVIDMMVHTNVSPEEAQAVLRGWRAAMAD  
LIESKRRTPGEDITTDLIAAREEDGSRLSEAELADTIFAILGAGSETTIN  
FFDNAITALLSRPGQLQLLRTGAVTWDDVIDEVLRVESPLAHLPLRYAVE  
DIELDGVTIPQGDPILVNYAAAGRDPALHGGTADEFDLARGDKTHLSFGY  
GPHYCLGAGIARMVATIGLSMLFERFPDLSLAVPATELKRLPTFIMNGHQ  
TLPVRLTAHAR

>CYP1005A1 (2572186454) *Salinispora arenicola* CNS848

VSAVLFRSWTKTAGTRWPDVTRVADQSGTEHLVVTRHALVRQVLTDQATY  
RPDNALAEAVTPIPVAAALRVLAGHRFRLPPTLANNGGVSHPAIRALVADAL  
HPTKVAAQRPWLTGLVADRVASIRTTLDSSGGPVDLYADLTADLPLLVLAR  
LVELPDAPVNAVKKQFARAALFLWAPLDADRQLSLADEVGRFHHQVLRFEFA  
DTGGGLAAALRATGHSPDVLVGALFFLLVAGQETTSQFLTLLHRLSGEP  
TIRAALRAGSISVADVVEEGLRLEPPIVTVRRVAAVDSTLGGTTVAAGTS  
VLLWLARAGRDPVVAAPDEFPRPGQRGSRRHLAFGAGAHRCCLGDQLARME  
AAVVVEQATPLLDGVTIVRPPWYPDNLTFRMPDAFVVRR

>CYP105BL2 (2572187117) *Salinispora arenicola* CNS848

MSSHSAAPDPETATPLHTLAPELAFFPQFERSAPFDPPQAYTELSGRCPV  
APVSMADGKPSWLITSFEGVRTTSLDPRFSSDMSHPGFNRTGKPVDDL  
KDTLGAMDGERHRYRRLMTGELTVRRAKAMRPVITQITDEALDQLAAAG  
PGADLVKHVAFVVPSPRVACHLVGIPLSYELFTGMAATLMDSTSSDDQFA  
ALQNMVSYFDTLVTDREHHRDRLGLGHMVRRYLATGELTRDMLIRLAWTT  
MAAGQETTAHMIGLGVAALLRHPDQLELLRREPHLLPGAVDELMRYLPLI  
QFGIPRVAMDDVEVDGQTVTVGEGVVALPPLANRDPVFERPDELDVRRN  
ARQHLLTFGYGPHQCPAHALARLELEVYGRLLERFPTLRLADSDADLKVQ  
DKDIMYRVSELAVTW

>CYP105AB8 (2572187290) *Salinispora arenicola* CNS848

MTETASSRHTDTEFPVQRECPFAEPVEYEQIREQSSIAMVRLTGGEAWW  
ISGHEQGRAVLADRRFSSDRKANFPFVSTDPAIRKRLHAQPLSLISMDG  
AEHTQARRALIGEFTVRRLAALRPRIQQIVDQCIDEMLTDDQHRADLVKT  
LSLPVPSLVICELLGVYPYADHDFQEHATLVRRNTASEVRQHSIDELNA  
YLGALIDRKLASPDLLGRQIARQHRDGTFRSSMVSLAFLLLVAGHET  
TANMISLGVVGLLQHPEQLAMIKDDPKTPLAIEELLRFFTIVDSVTSRV  
ATEEVRFGDTTINAGDGVVVSGLSADWDPTVFADPDRLDLERGARRHHLAF  
GFGPHQCLGQNLARLELQIVFDTLFHRIPTLRLAAPLDKIPFKTDAAIYG  
ARELPVAW

>CYP154M21 (2572187481) *Salinispora arenicola* CNS848

MEKCPYVLDRAGSDIHKEASNLRRARGPVTLLVELHGGYTAWSVTSYEVAKQ  
LLMDPRISKNTKAHWPEFRDGNVPQDWELYTWVAMDNMQTRDGKEHDLRLR  
KLVAFAFTGRQAVKSRPIIEEIVNRLDDLETAAPRGQAVDIKARYFYPLS  
TILVCDLLGIAEEDRDVILHGNVNSKTTNTAESEANLHQWQTALGRLV  
ETKRDPGDDLTTVIIKAGEDEQTPLTDDEVIGSLHLLIGGGTETTANVL  
CHTVVDMLTHPDQLAMVRSGAVSWESAWEVEVRKDGAVGSMFRCATDDV  
EIGGVTTIAKGLVLINAAAAGRDPERYGDAAAEFDITRADKANLSFGYGR  
HRCGLPALATMEAMVALPALFDRFPNLALAVPPNELKPGQGTFFNGYAEV  
PLLLRS

>CYP154M13 (2572187482) *Salinispora arenicola* CNS848

MSTGRPVVLDPTGRDIHGEADHLRALGPATLVELPGGVLAWSINSYEVGK  
ALLSAPNVSKSARRHWPAYNGEIPPDWEMISWVAMDNISTTFGGDHRRL  
RRLTAKAFGSRRAEQVRPMATHMVNTLLDRMADAADAGEVVDLKAAFAYP  
LPGMLVAELIGMSEEARVAAKVIDMMTATNITPEQAQGVLLGWRDAITD  
LIALKRAQPGDDITSDLIAARDEDGSLLTEQELVDTIFAILGAGSETTIN  
FFDNAITQLLTHPEQLELVKSGQVSWDDVIEEVLRLSPLASLPMRFAVE  
DIQLDGVTIHRGDPILINYAALGRDPALHGESAGVFDVTRQHKEHLSFGH  
GAHYCLGAGIARMVAKTGLSALFERFPRMTLAVSAKDLVPYPTFIMNGNR  
QLPVHLSGALTWREGEQSALGRA

>CYP105W2 (2572187496) *Salinispora arenicola* CNS848

MTGYQDRPTGDQPGAPVPSGSTDPGIGAFPLPRRCPPSPPAEYARLRAEH  
SVVRLPMLGGDTAWVVSRRHADVRQVLS DPRMSADRRRPGFPKFAPTTEGQ  
RQASFANFRPPLNWLDPPEHAICRRQIVDEFVRRVRQSRALVERVVDTH  
LDALTAAPGADLVSTFAYPVPSQVICEVLGPVYGEHEFFERRSTLMFRR  
STPADERARCAREIRDFLDVVVTDKEHRPGDDVLSRLLYRQRRAGGVDHE  
AVVSMAFVLLVAGHVTTSNMLALSVLALLTHPARLARLRAEPPERFPAAVE  
ELLRYFTVVEAATARTTTAEVTIGGVTTAAGEGVVALGQAANRDPRVFEH  
PDEFDPDRDARAHAFGHGRHICPGQHLARLEMEVALSRLFRRLPGLRLT  
MEVSDLPLKEDSNIFGLYALPVAW

>CYP248A2 (2572187504) *Salinispora arenicola* CNS848

VLADAVTAFDPTAVDVRRDPYPSYHWLLRHDPVHRGAHQVWYVS RFADVR  
AVLGDERFARTGIRRFWTDLVGPGLLSQIVGDIILFQDEPDHGRLRGVVG  
PAFSPSALRRLEPTIEATVNDLLRPARALGAMDVVADLAYPLALRAVLEL  
LGLPAGDANAVGRWSRAVGRTLDRGATAEDMRRGHAAIAEFADYVERALA  
ERREDGADLLALMLAAHRSQMSRNEIVSTVVTFTFTGHETVASQLGNGL  
LSLLDHPEQLELVRRQPHLVPQAVEECLRFDPVQSNTRQLAADVELHGR  
RLRRDDVVVVLAGAANRDPGRYDRPDELDIRRDPVPSMSFGAGMRYCLGS  
YLARLQLRTALGAMVALPDLRLVCNPNELAYQPRTMFRGLTRLPVAFTPA  
G

>CYP154M20 (2572187526) *Salinispora arenicola* CNS848

MERCPYVLDRAGRDLHGEAKALRRARGPVTLLVELHGGYTAWSVTSYEDIAKQ  
LLVDPRISKNTKETWPEFREGKVPQDWELYTWVAMDNMQTRDGEEHDLRLR  
KLVAQAFTTRQVAKVRPMIEDIVDRLLDDLEKVPAGEVVDIKGRYFYPLS  
TILVCDLLGIPEADRAEALHGTVVNARTTNSAESEANLHQWQSALSCLV  
ETKRREPGNDITTLIIKAREDEQAPLTDDEVIGSLHLLIGGGTETTNSVL  
CNTLIDLTHPDQMAMIRSGAVGWEEAWEVEVRKDGAVGSMFRCANADI  
EIGGVTTIAKGLVLINAAAAGRDPERYGDTTAEFDITRADKANLSFGYGR

HRCLGPALATMEAMISLPALFERFPDLVLAVPRDELKPQGTFFVNGYAEV  
PMLLRS

>CYP107FJ2 (2572187533) *Salinispora arenicola* CNS848

MSETLSTSVLLADAAEQRAWRAKLRGAGPVHRITTSGETGWLIVGHEEA  
RNALVDLRLQGRTATVGHGRMPEDLERALNSHMLNVGPPDHTRLRRLVS  
AAFTRRRIEQMRPRIQELTDELLDGLAGADEADLVAGLALPLPMRVLVDL  
FGIPAEDCADFNVWTKVLTSAGAVDLDRLTAAAGEMVAYLRGLLDRKRQV  
PESDLSALVAVRDGADRLSDDELTSMVYLLLTAGYETTVNLIGNGLNL  
LANPEQLVAFKADPDLLPQVVVEEAMRFDSPVQIAVRHSTEPVEIAGQAIP  
SGALILVSLWANRDPDRFTEPEAFRVDRQDNPQLGFGYGFHHCIGAPLA  
RMEGTIAIGTVIRRFAPALRLAHPAGSLTWRASMVMHGLTALPVHLR

>CYP211B2 (2572188343) *Salinispora arenicola* CNS848

MDVSEAIAVLISPSGRLDPYPTYEQLEAHGPVSQTTAGLFVVVTGYAEADM  
VLRDPRFVVLDDDLRDDVFPHWQDSPAIKSIARSMLRTNPPDHSRIRRLA  
AGAFTPRRVAAMREVVTAQADELVDEMIQAGRDGARVDFMDMFAYPLPVA  
VICALLGVPAADRSRFRRWAGDLTGILEPEITPEELAGADAGADELRDYF  
TGLIEQRRRAPADDLTALVQAHDADGDRLSGEELLANLVVLLVAGFETT  
TNLLGNGLVVLTRPEAAAAALRDEPDLAGYVDELLRYDSPVQLTTRTVR  
ESVSFAGTELPAGSWLLVLLGAANRDPRRFPDPARFDPGRAQSQPLSFGA  
GPHYCLGAGLARLEAQVAFPLLLRRLPELALAGRPSRRTRTLRGYETLP  
ITVGAVTADRGTAPGAVPGTP

>CYP247A7 (2572188458) *Salinispora arenicola* CNS848

VRLTPGAARDIDLDSVNLFDLDLYTSGDPHPIWDMRAQSPLHHQVLADG  
REFWSVTRYDDVCRVLGDYREFTSERGTVVTHLGEDDIAAGKLLTSTDPP  
RHTQVRRRAIGAKLTARAVASWQDRIRDAIVRFLEPALDGDTFDLAEQALL  
LPAIVTGPLLGIPERDWQELVQLTAMVTAPSDPHFQHGSEAATLAISHHE  
LVITYVTEWVKQRRSAGGGDGSLLDHLMSVRVGGAPLTDEEIALDGYSILL  
GANVTTPTHVSGTVLALIERPEQFEKAQADPSLLANLVEEGLRWASAACN  
FMRYAVNDTRIGGGTVPAGGAVVAWIGSANRDESYFPDPHQFDITRSGAN  
RQVAFGFGPHYCIGAPLARMTLGIFFEEELVQRFSGSIELAGEPQHLSYFI  
AGMTHLPIVAQKRKTP

>CYP107Q4 (2572188583) *Salinispora arenicola* CNS848

MTTTAETSATIDLFSPEVVADPFGWYARLREETGPTTGTLNIGTMMGGP  
EMWLVTTRYEDVRQVLTDPRFLTNPADSPLEDIRAGVFKRLDFPPDLIPW  
MANLLNVSDGEDHTRLRKLVSYALTAHRIGKLRPRVEKITADLLDKLAED  
GKDGSPVDLVEEYCYPLPVTVICELVGIDEPRPHWRWAGDSMATMNGER  
IPTTLVKCIELARELIANRAEPQDDLVTALVQAQAEQDNRVSDDEIIGI  
LFSLVTAGHQTTTYLIGNSVILLLENPDQLARLKENPSMWPQAVRELQRL  
GPIQFAQPRFPSEDIELGGVTIPRGAPVAPLLLAANTDPRRFDPNKLII  
DRLAVGSEHGLGFGKIHRCLGQHLAYQEAEEVALQGLFTRFPDLSLAVPR  
EEIPWILRPGFTTRTTLPLKLV

>CYP105G5 (2572188584) *Salinispora arenicola* CNS848

LTIETTETPPADDLSRAPLPRQFMQRDDPSKLPALAAALAEQSPVGRSTL  
PDGDPFWMVSGYDEARAVLSDPRFSSDRFRYHPRFKKLSGQLGERLRNDK  
ARAGSFINMDPPEHTRYRKLLTGQFTVRRMRQLTVRIEQIVTEQVDVMLA  
EGNSADLVSAFAVPVPSLMICELLGVRYEDRTEFQRRRAAGLLQTDLPKIQ

AVENLEAQRAFMQRLVTDKRRTPADDMISGLVHHAGAEPPLTDDDELVGIA  
TLLLFAGLDTTASMLGLGMFMLLQRPEQMAVLRDDPSRIGDAVEELLRYL  
TVVSTGLFRFAKEDVVLGDEHIPAGSTVVVSLMAANRDGRHWPEPETLDV  
TRVRSSHLAFGHGVHQCLGQQRLARIELTVGITELLRRLPNVRLAVPPADV  
PLRNDMITYGVHRLPILWDTP

>CYP105B1A1 (2572188604) *Salinispora arenicola* CNS848

MATDAAITRARTVPAWKALPAAVRDTHRAFVDVGNWSDGDVVRVSLGVSR  
PYLVTNPAHVQEVLHERAAIYPRGDDTALWRSVRKLVGDGILAEGDAAWAA  
SRRVLAPMFRPARINAMVDTMADAIAGAVDDLHGAATAGTPIDVGRELSR  
IVCSAIMRVFFADRITVRDALRIMKAQETIVTAMAPRILAPLVPWWIPMP  
GDRRFRAAVRSIDDILLPVLRQAQRQPDDGDDLLSRLVRARADDGQALSE  
KMRDDLVSMVAVTTETSTVVLTWMMPLLANHPDVANRLYDEIDRVVGGG  
PVRGDHLAELTYTRMVLDLLRLYPAGWILPRRAATTDVLGGVRINKGAT  
VILSPYVTQRMATAWWGPTAEAFDPERFAAGREAADGRHRYAYYPFGVGMH  
RCLGEHLFNLEAILIVATLLSRFRFALTDTSMPGVKVAASRTPARTVEMI  
LKPVPAPVPAR

>CYP105CH1 (2572188563) *Salinispora arenicola* CNS848

VSSLPLPTYPKLRDPADPLLPAPAEYLAIQSEKPIAKVLLPSGRPTWLITG  
HALARQVLTEPCVSVDRRHFNFPYPVPNPDAVVAQVARWTYILLGDDPPL  
HTERRRLLI SEFTVRQAQAMRPRIQQQLVDFHLEQLIAAGPGADFSKHFAM  
KVPSAVICEMLGVFPADHDYFQERTALQLRRDVPVAAQQAIDELLAYFE  
QLIQEKSSHPGDDVLSRLIVSNRETEAFDHEALVALGLLLLLVGGHETTAN  
TLTLATATMLERPEIAEQLRITDPSLMPSAVEEFLRYFSVAVAVSRIATAD  
LQVGGQLVRAGESMLLVNLTARDGTVFPEPHRLDIRRNARNHLAFSHGI  
HQCMGQNLARVEMQIALDITVLRRLPGLHLVAPFEELPFKYRHLVWGIEEL  
RVAW

>CYP105J3 (2572188768) *Salinispora arenicola* CNS848

MTDSVAFPQGRVCPHQAPAGYRPLAVQRPLAQVTLYDGRRVWAVTTRDLA  
RRLLDVDPRISSDRTNPAWPAIVPIVAAA VNDAAQQKVLKIATALVGTGPE  
HKAQRKMLIPSFTRRMNALRPMIQEIVDQQLDDEMIKSGAPTDLIPAFAS  
AVPVTVLYRLMGIPDDDHGIFEKLSHQLLAGPNANEAYDQLMGYMSRLIA  
ERRRNPGEGLVDDLLAQHGANDDADHDELVSTLVVQVAGNHGTTGSMIAL  
GLFALLQHPEQLAELRADPSLMPTAVDELLRFLSVPDVAVTRLAADDIEVE  
GTIIRKGDGVFFITSLINRDTDVHDAPNSLGWHHASAADHLTFGFGAHQC  
LGQSLARITMEIALGALIERLPSRLAVPAEEVPFLPAASLQVIAELPIT  
W

>CYP107EU1 (2572188947) *Salinispora arenicola* CNS848

VTIGQTLPLDLYVSPEFTRDPYAI FARLREQAPVCRVTTHRGMSAWMVTRH  
ADV RALLADNRLAKDGNRIGELMPRHSTLTGAATGFPPGLTNNMVNSDPP  
DHTRLRHLVGREFTGHRVEGLRPRIEEIVDDLLDGVAACGDEADLAETLA  
RRLPIAVIGELLGVPEADRAEFFRWADTLYGGTASPEALGQAYNAIVDYL  
GRLCDAKRDPVADDLLTALVQVSADEDRLSREELVSMALLLLLVAGHETTS  
KQISNGVLALLLNPEQLKLLKAQPARTAGAVEELLRFEGPSLSASLRETT  
EPVEVAGVVIPEGEFVLLSLASGNRDPEKFPDPDRDLITRSTQGNLAMGH  
GIHHCVGAALARLELEIVLSRLVVRFPQMQLAVEADDLEWLNVNSFFRAPL  
HLPVSLRR

>CYP163B16 (2572189009) *Salinispora arenicola* CNS848

VTAADPGRVSGESQTPAHTVDLADPATFANRDLTGFWQQLRDEEPIHWN  
PPTSGRRGFVVVSRYADILDVYRDDVTFTSERGNVLVTLLAGGDAGAGRM  
LAVTDGPRHAELRKLLLRALGPRVLAPVCAAVRANTRQMVREAVTKGEC  
FASDIASRIPMMTISNLLGVPDADRAFLSLTKTALSADDESISETESAM  
ARNEILLYFQDLMEFRRDHPGEDVVSMLVNSTIDGAPLSDDDIVLNCYSL  
IIGGDETSRLTMIDSVNTLAAHPKQWRRLKDGQCEIDKAVDEVLRWASPS  
MHFGRAAAKDTILRGVQIRADDIVTLWHASGNRDERVFHRPEVFDLGRTP  
NRHLSFGHGPHYICISYLAKVEISELLIALRDLTSGFETTGEFQIRSNL  
LTGFSTMPVRFVFPDRAGLARDALDG

>CYP1198B1 (2572189313) *Salinispora arenicola* CNS848

MSGELTDQRTAPGAGGNPLRSLMDHGIRANPYPLFGELREAGPTAVEDGS  
VVLFGHEYEHCSQILRHRDMGSDTSEAPSIKGFVVDDAERAGSSIFFMDQP  
GHGRQKRLVSKSFTPRIVKSFGPQITHIVDGLFEDFRDRGELDVVTDLAY  
PVSIGIICDLFGIPDDERDMLKEWSDDLALSTELPTLGAAIGVLNVFTRD  
EINRFGSVAMAAHAYFADLIHRRRKNPGDDLVSLLATESNGERLTRFEV  
TSVLATLFVAAHESTTNLISGGILALLRNQDQMAVLRENPGIITNVVDES  
LRYDPPVHLAARMARATTIGGYDLDPGTIVVVLMAAGNRDPRAYENPDV  
FDVNRKIRNVSLAFGAGAHFCIGSGLAKLEAEIAISAFQRLKHPEVDES  
SLEYRRHIVVRGLEHMKVAFQP

>CYP107AY1 (2562101604) *Salinispora tropica* CNY678

MRAELAPIPRSGARLGQEYDQLRNAGDVHQVLLPDSSSLAWLVTNPKLVSR  
ALTDPRALNRRHSRGSWSGFALPPALDANLLNLDAPDHTRLRRLVGPAP  
SPQRVSAALRPRIIRRTAEHLLDTLVATSGPVDLVTGYCTPLSVQVIADLMG  
VPEAGRDLRTWTDTMLTSYPPDRDAIRQAVVELHGYVVDLIDTKRQQPG  
DDLALSALVTIEQDGDRLTRDELTSLAFLILFAGYENTANLIASTVLRLLD  
HGGLRGVQLPEAIEETLRLEPPAPAAVRRFPTEEMTIGGATIPAGDIVLL  
SIAAATRGTAGNAARLAFGNPHFCLGAALARVEAEALTVLARRLPDLA  
LALPVAQVRWRPTFRTHGPAELLVTW

>CYP105AB2 (2562102029) *Salinispora tropica* CNY678

MTETASIAATTRTASGQLTDAEFPVQRGCPFTTPTTEYEQIREESSIAKVRL  
KNGGEAWWIAGHELGRSVLADRRFSSDRRRDNFPFVSTDPETRAQLQSQP  
TSMGLMGDAEHAQTRRALMGFTVRRMAGLRPRIQQIVDQHIDEMLTTPQ  
RSVDLVEALSPLVPVSLVICELLGVYPYADHDFQGLTGPLLRTTPPEVRL  
RIQEELNTYLGTLIDHKLTDPTDDLRSRQIAKHRDNGTFDRASMVSLAFL  
LLVAGHETTANMISLGVVGLLQHPDQLVLIKDDPDKTPLAVEELLRYFTI  
ADSVTARVATEDVQLGDTTINAGDGVVISGLAADRDPTVFAEPDRDLER  
GARHHVAFGFGPHQCIGQTLARMELRIVFDTLFRHRIPTLRLAAPLDDIPF  
KSDAFVYGIEELPVAW

>CYP1005A1 (2562102258) *Salinispora tropica* CNY678

VSAVLFRSWTKTAGTHWPAITRVADQQGTEHLVVTOHALVRQVLTQDLTY  
RPDNALDAVTPIPAALRVLAGHRFRLPPTLANNGGVSHPAIRALVADAL  
HPAKVAAQRPWLTGLVAERVAAIRRTLDSGGSTDHAELEADLPLLVLAR  
LVELPDAPVSAVKQFARAALFLWAPLDADRQLALADEVGRFHQVLRIFA  
DTGGGLAAALRATGHPPDVLVGALFFLLVAGQETTSQFLTLLHRLADEP  
TVRAALRADSVSVADVVEEGLRLEPPIVTVRRVAAVDSTLGGSTVAAGTS  
VLLWLARAGRDPVVPAPDEFPRPGQRGSRRHLAFGAGAHRCCLGDQLARME  
AAVVVEQVTPLLDGVTVVRPPWYPDNLTFRMPDAFVVRR

>CYP154M1 (2562103403) *Salinispora tropica* CNY678

MRRRCPVVIDPAGTDIHAEGARIRANGSVSQVELPGGVLAWSVTGQQVAR  
KVLSDQRFKDPKHKWTDYLEGRIGQDFPLIGWVLMNDLTTAYGSDHSRL  
RKPCANAFTPRRVEALRPAVERAAVELLGELATVSPTESVDLKARYAHL  
PSRVICDLFGVPEEDREEMLRGGEVNVDTRVSAEEEEANVERWHQQLDF  
IEEKRRNPGPDLTSDLIAAQQAEGRSLTDSEMVGTLHIMLATGTPEPVKNL  
IGNAVFALLTHPEQLDLVRSGRAGWDDVIQETLRMQAPVAHLPFREFVED  
VDIDGVTIRRGDPLLNVFAAIGRDPDVHGDAAEFDITRADKEHLSFGHG  
VYRCIGQPLALREAEIALRMLFQRFPNLVLAVPPEEVTPQPTFIMNGLDT  
LPVLLKGRA

>CYP208A4 (2562103431) *Salinispora tropica* CNY678

VTVAAAGRTFSGPTGAALLRSLWQLGQDRLGLMTSAARYGDAVRLGVGSR  
SLYFFNHPDHAKHVLADNSGNYTKGLGLVHARRALGDGLLTSEGELWREQ  
RRVIQPVFQAKRVAGQAHAVAEADRLIARLRARRGRGPVNLTDEFTALT  
LGVLGRTLLDANLDAFTTVGAAFEEMQNQAMFEMASMSMVPWVPLPQQ  
RFRRARRELERIVGRIVADRTARGEETGADDALSRLIASTRDEPDGVAR  
RRMRDELVTLLLAGHETTASTLGWTFHLLINQDPRVRVRLREEAIDVLGGR  
LPEYADLARLTYTKMVVSEAMRLYPPVWMLSRLARDADVVDGYPPPARAD  
VLICPYTLHRHPAFWPEPERFDPERFDPEVTTDRPRYAYVPFGAGPRFCV  
GNHLGLMEAVFVAMVSREFDLVAPVGQPVVAEPMLSLRVRGGLSMTVEP  
VS

>CYP125A15 (2562103510) *Salinispora tropica* CNY678

MTEPRIPVGFDFDTPAVLERRVPREEFAELRRTAPVWWNVQPRGSAGFDD  
DGYWVVTRYADVMASRSDSTYSTRENTAIARFQPGTTRADLEMQRVIML  
NVDPPHETKLRAIVSRGFTPRAINALRGSLAERAERIVRDAAVRGTGDFV  
ADVACELPLQAI AELIGVPQHRRKVFWDWSNQLIGYDDPAYGVDPLTAAA  
ELLAYAMEMANERQLNPSDDLVTKLVAQIDGEHLTTDEFGFFVMLLAVA  
GNETTRNAITHGMLAFLEHPEQWELFKAERPRSAVEEIIRWATPVNVFQR  
TALVDTTLGGQAI SAGQRVALFYGSANFDES VFEEPERFDITRSPNPHLG  
FGGSGAHFCLGANLARLEIELIFHSIADHMPDIRKVAEPRRLRSGWINGI  
REMPVRYR

>CYP211C1 (2562103643) *Salinispora tropica* CNY678

VLDVEGLLTRLYSEQGRQDPYPVYADLHAQGAIAALAPRPEGQRVA AVAV  
GYDLVGAVLRDPEWSKQPPPGWMEQEILRTLQSSMMFINPPDHGRMRKVF  
AGTFTPRRLGTLEPVINRVADELDRMADAGPGEVDFVAEFAYPLPARVM  
AEFIGIPATELAWYRDRVDRIDAFLDVAGKTPERLAAANAAAAELRVFYA  
DLLARRRRTPGEDLISGLVEAVDAGGVQLTEDELINNLI VLFNASFVTTV  
YMLSNGLPVLLHEHPEVAAALADDPDELTAGAIDEILRLQTPVHLLARAAPR  
DTVLGGVPI PQGQNVLLIIAAANRDP AHFPDPDRFDPRRPGPPSLAFGLG  
LHYCLGA AVSRLEGRALPRLLSRFPRLRIMEQPVYSGSLFLRGIDKLSV  
SPGGRMHP

>CYP107AW1 (2562103916) *Salinispora tropica* CNY678

MESVTSTSAPPPVPYIADPYPALARIRANGPVSI LHSDEGIPMWVIARYR  
NVRAALADPRFGQDARRAQTLADNRVAGVTLGGDVIHMLNSDPPDHTRLR  
HLVQGAFTARRVAAMRPLVERITTSLLDGVGGRQTVDLVQDFAFPLPMLV  
ICELLGFPAEERDAYRSWSTAILTHNDDPAAAFATALRDMTDYIEVQLRHR  
RARPGEDLLTELLAARDAGQLTDEIVGMVFLLLIGGHETTVNLLGTATL  
ALVRNPDQHRWLLANPHALSEAIDEFLRYESPVAMATLRFTTAPVTVDDV  
VIPAGELVLVSLGGANRDPDRFPDADRLILDRRDTGH LAFGHGLHRC LGA



FLGKLEGEVALGALLGRYPGLTLAAEVRQLRWRDTIMLRGLESIPVSLHG

>CYP211B1 (2562104144) *Salinispora tropica* CNY678

MDASEAVALLMSPLGRIDPYPTYERLRAHGPPVQTAAGFFVVTGYTEADT  
VLRNARLAFEVMDDELRDDVFPHWQDSPAMKSIARSMIRANPPNHGRMRR  
LAAGAFTPRRIAALREVVTQAQADELADEMIRAGRDGAPVDFMGSFAYPLP  
VAVICALLGVPAADWARFRGWASDLTAVLEPEITPQELTVADAGASELRD  
YFTELIAQRRRAPADDLTALVQTHDADGDRLSGEELLANLVLLLVAGFE  
TTTNLLGNGLVLLAHPDSATALRDQPELAPGHVDELLRYDSPVQLTTRT  
VRESVLLAGVELPAGSWVLVLLGAANRDPERFTDPTRFDPGRAQSPPLSF  
GAGAHYCLGAGLARLEAQVAFPLLLRRLPELALAGEPTRRNRLTLRGYET  
LPVTVSAIAADHGTTPAGVARGTP

>CYP163B1 (2562104415) *Salinispora tropica* CNY678

VTAA DTGRVSGESQTPAHTVDLADPATFANHDLTGFWQQLRDEEPIHWN  
PPTAGRRGFVVVSRYADILDVYRDDVTFTSERGNVLVTLLAGGDAGAGRM  
LAVTDGPRHAELRKLLLRALGPRVLAPVCAAVRTNTRQMIREAVTKGEC  
FASDIASRIPMMTISNLLGVPDADRAFLLSLTKTALSADDESISETESAM  
ARNEILLYFQDLMEFRRDHPGEDVVSMLVNSSIDGAPLSDDDIDLNCYSL  
IIGGDETSRLTMIDSVNTLAAHPQQWRRLKDGQCEIDKAVDEVLRWASPS  
MHFGRVAARDTILHGVRIRADDIVTLWHASGNRDERVFHRPEVFDLGRTP  
NRHLSFGHGPHYCIGSYLAKVEISELLIALRDLTSGFETTGEPPQIRSNL  
LTGFATMPVRFVPDRAGLARDALDG

>CYP107AX1 (2562104801) *Salinispora tropica* CNY678

MTSRPTAVFDQCLLRDPHSRYNALRDQAPVHHVLTDPDGAPAWLVTRYNDV  
RAAFTDPRLSVDKRFSGTDGEHGSSLPPELDAHLLNRDPPDHTRLRLRLAA  
AACTPRRVADLHPAVERIVSTLLDGLAGHDRAELIGSLASPLPLQVMHEL  
LGLPTQANIDFRTWTNTLLSADANQPAQSRAAMANMRRFLIEQLAHKRAQ  
PGDDLLTGLLAAREDDRLTDDELVAMVFLLMFAGYDNTAALIGTVTHAL  
LTNAELHEAVRGSLALDELIDEVLRWNPAFPLAVRRFAREPITIAGQTI  
PAGDRIWLCLASANRDPAQFTQPDELGIIGLRRPHLSFGHGIHYCLGAPL  
ARLQTTIAVTSLNRFPEMRLAVPAHDIRWRESFRLRGLIALPVYL

>CYP125G1 (2562105118) *Salinispora tropica* CNY678

MSTEVVSTGNRADIAPATYAAGVPYAEFARLRRDKPVSWSVPEAALWRRS  
GEGRILSQPGFWAVTTHEGVVAASRQPEVFSSGRQGAFLADPRTTADLE  
QARQLLVNMDAPQHARVRKLVTAFTTPRAIRALGDSVTAHARNLVERAVR  
QEEDVVDLAAELPLLVLADLLGLPREDRHLLYQWSNNLVGFDDEYGG  
GDVEAYRKTFEAFQYALSVAGERRRAPREDLMTLLATSEVDGRRLTDRE  
FCNFWLLLVLVAGNETTRHLITGSVLALVDNPMQRERLVADDTLLPSAVDE  
LLRWVSPIMQFRRTAIVDTELCTPIAAGDKVVLWYTSANRDAAVFEAPD  
ELRLHRNPNPHLSFGMGPHFCLGAHLARLEARTMLRELAPHLRSFRLTGP  
VVRLESNFVNGVKSPLPGSFTGQ

>CYP1004A1 (2562105157) *Salinispora tropica* CNY678

MRANTARPHLSAAFLATKDDPYPAYAELRARGPLTRAELGQWLVTGHGAV  
SALLRDGRLESRMPAEYTRTLTGDSPPGVDFLHRIVLTRTPPEHTRLRRFI  
GRALGTPVVRRLHDRIAAATDALLEPALDRGRLDVVTELAVPLPVGVVCD  
LIGIPTGDRPAVLTRVTALAKVFDAANLSPADLADINTALPWLHDYFGDL  
LAVRRAGSGGPTLTEMYYEESASDRLAVADFVDNMLFLFHAGFETTMGLV  
SNGVAALLNNPEQLGRRLRADPALVPSAVEEFLRYDAPIQNVIRVARKPVE

VAGQKIRAGRTVLLLLGAANRDEEVFADAERLDVGRDPNPHLGFGGGLHH  
CVGTALARLMAVVVFERLVDRTVLGPAAPAVRRRHASLRSYDHLPLAVA  
AR

>CYP1004B1 (2562105161) *Salinispora tropica* CNY678

MTTSALAPRFDALDPNVVEDPYPEYARLRAAGPLCRLGPGSWGVTREFADV  
TNLQHDPRLGSEFPAGYHEISVGDGPASAFFQRMVLYRDPDPHIRLRRLM  
SGAFTPAVVRRLRSHIEDLVDELLAPALAAGRMDLVPELAYPLPVRVVC  
LMGIPPESTEDVRHHATNIGRAFTAVVPEQARTEADEAVSWLREHLGALL  
EQRRSHRGDDLLSRLLDAEESGDNLSADEIVDNTVFSFFAGFETTVHMIT  
TGTAALLAHPDQLARLRADPSLVTSASVDEFWRWDAPIQGTARYVREPIEI  
GGRTIRRGRLVLMIGSANHDERRFAQPDRLDVGRQDNPHVAFGGGAHL  
LGAFLARMEGAVVFDRLARLAVLEPDGPTVREPNTPFRAVASVPVRIGDR

>CYP113E1 (2562105305) *Salinispora tropica* CNY678

MMATVPRLTFADGGVSVLPWFRQMRDDQPVWYDQGTGSWNVFRYADIAQI  
LTDPAFTSSDPGRMTMPELVEEAEGSLVAVDPPRHGRLRALISTAFTPRL  
VEQLAPRVRSIAERLLDRTFVDRGPEGEFDAIGDVAYLLPVYVIGELLGL  
PETDREYLVRTADEFYAISADDPFDGTYMASMQSTLDGLGTYMLDQAERR  
RARPGDDLMSALAHAEIDGEQLNDREIRNFVLLLTAGHITTTALLGNTL  
LALGERRDVMLRWRHGQVDTADVLEEVLRRHRTPFTEVYRFTTTEVTIGNQ  
VVPGDQLLRLWIASGNRDERQFADPDFTFVLGRDSRHLGFGGLGIHYCLGAS  
LARMESVVLVLAERTTTTAPAVQGLSYDAPGIFCLRSLPVSYRRS

>CYP107E3 (2562105761) *Salinispora tropica* CNY678

VTIDQEIRKYPFCESPGIGIDPTYGLLRSTEPLARVQLPYGEVSWLATRY  
EDVKTVLTDPRFSRAAAQGKDQPRTREEMTYEGIIGLDPPDHTRLRKL  
KALTARRVNAIRADAQRIANEYVDEMIAGKSPGDLVELFALPYPVTVICE  
LLGVFFEDRAQFRIWTEGLTSTSEQLMVYAEQLFGYMGKLVAQRREEPTD  
DLLGALVKARDEGDRLTEQELLSIAGVGLLLTGVTSTHIPPVYALLT  
HPELMAQLRADRSVPAAVEELLRMIPLNPAAMFPRYAVEDVTLSGITVR  
AGEPVLVSLPGANRDPEVFENPETFDFTREQNPHVAFGHGPHHCLGAQLA  
RMELQVALHTVLDRFPDLSLADGDEGVSWKSGLLVRGPSRLLVAV

>CYP1005A1 (2515985850) *Salinispora arenicola* CNH905

VSAVLFRSWTKTAGTRWPDVTRVADQSGTEHLVVTRHALVRQVLTDQATY  
RPDNALAEAVTPVPVAALRVLAGHRFRLPPTLANNGGASHPAIRALVADAL  
HPTKVAAQRPWLTLGLVADRVATIRTTLDSGGPVDLYADLTADLPLLVLAR  
LVELPDAPVNAVQKFARAALFLWAPLDADRQLALADEVGRFHQVLREFA  
DTGGGLAAALRATGHSPDVLVGALFFLLVAGQETTSQFLTLLHRLSGEP  
TIRAALRAGSSSVADVVEEGLRLEPPIVTVRRVAAVDSTLGGTTVAAGTS  
VLLWLARAGRDPVVAAPDEFPRPGQRGSRRHLAFGAGAHRCCLGDQLARME  
AAVVVEQATPLLDGVTVVRPPWYPDNLTFRMPDAFVVRR

>CYP1051A1 (2515986083) *Salinispora arenicola* CNH905

MATDAAITRARTVPAWKALPAAVRDTHRAFVDVGNWSDGDVVRVSLGVSR  
PYLVTPNAHVQEVLHERAAIYPRGDDTALWRSVRKLVGDGILAEGDAAWAA  
SRRVLAPMFRPARINAMVDTMADAIAGAVDGLHGAATAGTPIDVGRELSR  
IVCSAIMRVFFADRITVRDALRIMKAQETIVTAMAPRILAPLPWWIPMP  
GDRRFRAAVRSIDDILLPVLRLQAQRQPDGDDLLSRLVRARADDGQALSE  
KMRDDLVSMVAVTTETSTVVLTWLWPLLANHPDVANRLYDEIDRVVGGG

PVRGDHLAELTYTRMVLDELLRLYPAGWILPRRAATTDVLGGVRINKGAT  
VILSPYVTQRMATAWWGPTAEAFDPERFAAGREAADGRHRYAYYPFGVGMH  
RCLGEHLFNLEAILIVATLLSRFRFALTDTSMPGVKVAASRTPARTVEMV  
LKPVAPVPPAR

>CYP105G5 (2515986108) *Salinispora arenicola* CNH905

LTIETTETTPPADDSLAPLPRQFMQRDDPSKLPALAAALAEQSPVGRSTL  
PDGDPFWMVSGYDEARAVLSDFRFSDDRFYHPRFKKLSGQLGERLRNDK  
ARAGSFINDPPEHTRYRKLLTGQFTVRRMRQLTVRIEQIVTEQVDVMLA  
EGNSADLVSAFAVPVPSLMICELLGVRYEDRTEFQRRAGLLQTDLPKQ  
AVENLEAQRAFMQRLVTDKRRTPADDMISGLVHHAGAEPLTDDELVGIA  
TLLLFAGLDTTASMLGLGMFMLLQRPQMAVLRDDPSRIGDAVEELLRYL  
TVVSTGLFRFAKEDVVLGDEHIPAGSTVVVSLMAANRDGRHWPEPETLDV  
TRVRSSHLAFGHGVHQCLGQQRLARIELTVGITELLRRLPNVRLAIPPADV  
PLRNDMITYGVHRLPILWDTF

>CYP107Q4 (2515986109) *Salinispora arenicola* CNH905

MTTTAETSATIDLFSPEVVADPFGWYARLREETGPTTGTLNIGTMMGGP  
EMWLVTTRYEDVRQVLTDPFRFLTNPADSPLEDIRAGVFKRLDFPPDLIPW  
MANLLNVSDGEDHTRLRLKLVSYALTAHRIGKLRPRVEKITADLLDKLAED  
GKDGSPVDLVEEYCYPLPVTVICELVGIDEPRPHWRAGDSMATMNGER  
IPTTLVKCIELARELIAKRAEPQDDLVTALVQAQAEQDQNRVSDDEIIGI  
LFSLVTAGHQTTTYLIGNSVILLLENPDQLARLKENPSMWPAVRELQRL  
GPIQFAQPRFPSEDIELGGVTIPRGAPVAPLALLAANTDPRRFPDPNKLII  
DRLAVGSEGHGLGFGKGIHRCLGQHLAYQEAEEVALQGLFTRFPDLSLAVPR  
EEIPWILRPGFTRTRTLPLKLV

>CYP208A12 (2515986386) *Salinispora arenicola* CNH905

MTLDTITPRVPLGPPTAALRMLLVMKRDRLGMLTSAAARYGDASRLPVG  
HKALWFFNHPRYAKHVLADNSANYHKGIGLVHARRALGDGLLTSEGLDWR  
KQRKVIQPAFQSRRIAQQAGMIAEEAFALVERLRARAGAGPVELTAEITG  
LTLGVLGRSLLDADLAGFDSIGDSFATVQDQAMFELETNLAVPMWIPLPR  
QIRFRRARRKLQAVVDTLVDGRAGNLADRVDVLSRLILSARGEADPRVGR  
ERLRDELVTLLLAGHETTASTLGWTLSLIDRHPGVWERLHAEAVEVLGDR  
LPEYDDLRLRLRYTVMVVEEAMRLFPPVWLLPRRALAPDTIGEYRVANAD  
VVISPYTLHRHPEFWPNERFDPERFAPGQAADRPRYAYLPFGAGPRFCV  
GNNLGMMEAVFVIALLCRHLRLTGVPGHRLVPEPMLSLRIRGGLPLVVRP  
VS

>CYP211C1 (2515986457) *Salinispora arenicola* CNH905

VVDVEELLTRLYSAQGRQDPFPVYADLHAQGPIAALPPEPERRRVAAVAV  
GYDLVGAVLRDPEWSKAPPPGWTEQEILRTLQTSMMFINPPDHGRMRHVF  
AGTFTPRRLGALEPVVNRVADELDRMADAGAGGLDFVAEFAYPLPARVM  
AEFIGIPETELDWYRERVDVIDAFLDVAGKTPQRLAAANAAGAELEAFY  
ELLARRRRTPGEDLISGLVEAVDAGGVELTEDELVSNLIVLFNASFVTTV  
YMLSNGLPVLLAHPEVAAALATDPVLTAGAVDEILRLQAPVHLLARAAPR  
DTVLGGVPIPPQGNVLLLIAAAANRDPAHFPDPRFDPWRSPPSLAFGLG  
LHYCLGAAVSRLEGRALPRLLSRFPRLRIMEQPVYSGSLFLRGIDKLSV  
SPGEGSTRE

>CYP125A41 (2515986607) *Salinispora arenicola* CNH905

MTEPRIPAGFDFTDPEVLAHRVPREEFAELRRTAPVWWNAQPRGSAGFDD  
DGYWVVTRYADVMTVSRSDTYSTRENTAIARLRPDTTREDIEMQRVIML  
NVDPPHHTKLRAIVSRGFTPRAINALRGSLAERAHIVRDAAVRGVGDVF  
TDVACELPLQAI AELIGVPQHHRKVFWDWSNQLIGYDDPAYGTDPLTASA  
ELLAYAMEMAERQRSPSDDLVTCLVNAQIDGHLTTDEF GFFVMLLAVA  
GNETTRNAITHGMVAFLDNPEQWELFKAERP KSAVEEII RWATPVNVFQR  
TALVDTVLGGQAI SAGQRVALFYGSANFDEAVFEDPERFDITRSPNPHLG  
FGGSGAHFCLGANLARLEIELIFNSIADHLDPDIRKVAAPQRLRSGWINGI  
RQMPVRYR

>CYP211B2 (2515986746) *Salinispora arenicola* CNH905

MDVSEAI AVLISPSGR LDPYPTYEQ LRAHG PVSQT TAGL FVVTGYAEADM  
VLRDPRFVVLDDDLRDDVFPHWQDSPAIKSIARSMRLTNPPDHSRIRRLA  
AGAFTPRRVAAMREV VTAQADEL VDEMIRAGRDGARVDFMDMFAYPLPVA  
VICALLGVPAADRSRFRRWAGDLTGILEPEITPEELAGADAGADELRDYF  
TGLIEQRRRAPADDLTALVQAHDADGDRLSGEELLANLVVLLVAGFETT  
TNLLGNGLVLLRRPEAAAAALRDEPD LAPGYVDELLRYDSPVQLTTRTVR  
ESVSFAGTEL PAGSWLLVLLGAANRDPRRFPD PARFDPGRAQSQPLSFGA  
GPHYCLGAGLARLEAQVAFPLLLRRLPELALAGRPSRRTRLTLRGYETLP  
ITVGAVTADRGT PAGVAPGTP

>CYP162P1 (2515987428) *Salinispora arenicola* CNH905

MGLPSEVDLADPDLYAEGDPDAEWAWLRAHRPVYRNPAGTTAEFWALTRY  
RDALQVYRDPSTFSSERGMVLGVDPVAGDPAAGRMLVVTDPPRHPKLRI  
VSGIFVPRTMHRLEGRVRS LVDQLLHRVVDGAGRCDFVNDVAARLPVAII  
CELLGVPADEQDWMYHLTSTAFGGGDPAGSAEVS AVERAEAYGDILLYYG  
ELAAERRRRPGDDLVTLLVHADLDGEPLDVEDVLVNCTNLIIGGNETTRH  
AASGGLLALAQRPELWRLRETPTAVPTVVEEVLRWTTPGMHVLRATRD  
TEIGGVPIRAGERVVVWNAANRDEDVFADPQRFIDRSPNRHIAFGQGG  
HHCLGAALARLELTILFEEMAKQVTNVRLTG PVRVRVRS CVLRGIRALPVE  
LVT

>CYP244A4 (2515987835) *Salinispora arenicola* CNH905

MSTTTNTELTEAPETNMPVD PGLFDCMPDLIAAARVAPVVRIPYLGRHAW  
VVCDELVKQAL THPKMGKDIALVPEWMRQPGLMVTAQPDPEYARAMIMS  
DGENHARIRRIHAPVLS PRNTERWGERVADKVEGFLDELSQAGSGGSTEV  
NVVTNYTHKIPLAFISEMLGLPPEAEHRLRGITDIMLYSSDYAARREAIG  
GLFGAVEDWVRNPADLRDGVITGLLAASDGPDAAVTEGEVIVWTLGMIIT  
GYETTGLISTSLYEAIRPPHERPKTDEDITAWIEETLRVHPPFPHPPTW  
RFPLEDIELGGYLIPKGA PVQVSIAAANRKPGE GADSFDAERRGHGHL SF  
GLGMHYCIGAPLVRLEAQIAVRGFLRRFPQARLSAETAVQWESEWMIRRM  
SVLPAVLS

>CYP245A7 (2515987839) *Salinispora arenicola* CNH905

MPSATLPRFALTGWSRENIVNPYPVYQRYREVASVHRGEPGGDAPDTFYV  
FSYDEVVQVLSSNCFGRGRSLDAAKASVPVPAEQKALRAIVENWLVMFMDP  
PRHTELRSLLNRSFSPRIVTEL RPRIARIAQELL SRLGQQVDVDLVESFA  
APLPILVISELLGIPEERRAWLRANALALQEASSRAGR DVDGYARAEVA  
AQEFTEYFREQVRLRRGRAGGDLITILANAQERGAPVSLDAIVGTCVHLL  
TAGHETTTNSLAKAVLALREHPAVLDELRGAEGLTTDAVEEFLRYDPPVQ  
AVTRWAHQD TTLGGCDIPGRSRVALLGSANRDPARFPSPDVL DVRPAD  
RHLSFGLGIHYCLGATLARAELEIGLQALLDGVP TLGYGTQHVDYADDLV  
FHGPSRLVLVNLGERCT

>CYP105BL2 (2515988237) *Salinispora arenicola* CNH905

MSSHSAAPDPETATPLHTLAPELAFFPQFERSAPFDPPQAYTELSGRCPV  
APVSMADGKPSWLITSFEGVRTTLSDPHFSSDMSPGFNRTGKPVDDLL  
KDTLGAMDGERHRYRRLMTGELTVRRAKAMRPVITQITDEALDQLAAAG  
PGADLVKHVAFVVPVSRVACHLVGIPLSDYELFTGMAATLMDSTSSDDQFA  
ALQNMVSYFDTLVTDRHHDRDDLGHMVRRYLATGELTRDMLIRLAWTT  
MAAGQETTAHMI GLGVAALLRHPDQLELLRREPHLLPGAVDELMRYLPLI  
QFGIPRVAMDDVEVDGQTVTAGEGVVALPPLANRDPVAFERPDDEL DVRRN  
ARQHLTFGYGPHQCPAHALARLELEVYGRLLERFPTLRLADSDADLKVQ  
DKDIMYRVSELAVTW

>CYP107EU1 (2515988343) *Salinispora arenicola* CNH905

VTIGQTL PDLVYSPEFTRDPY AIFARLREQAPVCRVTTHRGMSAWMVTRH  
ADVRALLADNRLAKDGNRIGELIPRHSTLTGAATGFPPGLTTNMVNSDPP  
DHTRLRHLVGREFTGHRVEGLRPRIEEIVDDLLDGVAACGDEADLAETLA  
RRLPIAVIGELLGVPEADRAEFFRWADTLYGGTASPEALGQAYNAIVDYL  
GRLCDAKRDPVADDLLTALVQVSADEDRLSREELVSMALLLVAGHETTS  
KQISNGVLALLLNPEQLKLLKAQPARTAGAVEELLRFEGPSLSASLRFTT  
EPVEVAGVVIPEGEFVLLSLASGNRDPEKFPDPDRLDITRSTQGNLAMGH  
GIHHCVGGAALARLELEIVLIRLVARFPQMQLAVEADDLEWL VNSFFRAPL  
HLPVSLRR

>CYP166A4 (2515988690) *Salinispora arenicola* CNH905

MTDAISFELPWARTDKFDPPAVFDALREQRPLARMRYPDGHVGVIVSSYE  
LVREVLGDPRFSHSCAVGHFPVTHQGQVIPTHPQIPGMFIHMDPPEHTRY  
RRLLTGEFTVRRTSRLTGHVEGVATEQIEVMREHGAPADLVATFARPLVL  
RVLSGLVGLPYGERDRYLHAVTLLHDAEADPAEAAAAAYEQAGAYFDEVIE  
RRRRQPEDDLISTLVGDGELTGEELRNIVTLLLFAGYETTESALAVGMFA  
LLHHEDQLARLRADPTKIDAAIEELLRYLTVNQYHTYRTASEDIELHGEV  
INKGDSVTVSLPAANRDPARFACPAELDIDRETSGHVAFGFGI HQCLGQN  
LARVELRAGLSALLRAFPNLRLAVPADEVPLRLQGSVFAVKNLPVCW

>CYP107FJ2 (2515988806) *Salinispora arenicola* CNH905

MSETLSTSVLLADAAEQRAWRAKLRGAGPVHRI TTQSGETGWLIVGHEEA  
RNALVDLRLQGRATVGHGRMPEDLERALNSHMLNVGPPDHTRLRLRLVS  
AAFTRRRIEQMRPRIQELTDELLDGLAGADEADLVAGLALPLPMRVLVDL  
FGIPAEDCADFNWTKVLTSAGAVDLDRLTAAAGEMVAYLRGLLDRKRQV  
PESDLLSALVAVRDGADRLSDELTS MVYLLLTAGYETTVNLIGNGLLNL  
LANPEQLVAFKADPDL LPQVVEEAMRFDSPVQI AVRHSTEPVEIAGQAIP  
SGALILVSL LWANRDPDRFTEPEVFRVDRQDN PQLGFGYGFHHCIGAPLA  
RMEGTVAIGTVIRRF PALRLAHPAGSLTWRASMVMHGLTALPVHLR

>CYP154M20 (2515988813) *Salinispora arenicola* CNH905

MERCPYVLDRAGRDLHGEAKALRARGPVTLVELHGGYTAVSVTSYEIAKQ  
LLVDPRI SKNTKETWPEFREGKVPQDWELYTWVAMDNMQTRDGEEHDLRL  
KLVAQAFTRRQVAKVRPMIEDIVDRLLDDLEKVPAGEVV DIKGRYFYPLS  
TILVCDLGIPEADRAEALHGT VVNARTTNSAESEANLHQWQSALSCLV  
ETKRREPGNDITTLIKAREDEQAPLTDDEVIGSLHLLIGGGTETTSNLV  
CNTLIDL LTHPDQMAMIRSGAVGWEEAWEVEVRKDGAVGSMPPFRCANADI  
EIGGV TIAKGDVLIN YAAAGRDPERYGDTTAEFDITRADKTNLSFGYGR

HRCLGPALATMEAMISLPALFERFPDLVLAVPRDELKPQGTFFVNGYAEV  
PMLLRS

>CYP248A2 (2515988836) *Salinispora arenicola* CNH905

VLADAVTAFDPTAVDVRRDPYPSYHWLLRHDPVHRGAHQVWYVSRFADVR  
AVLGDERFARTGIRRFWTDLVGPGLLSQIVGDIILFQDEPDHGRLRGVVG  
PAFSPSALRRLEPTIEATVNDLLRPARALGAMDVVADLAYPLALRAVLEL  
LGLPAGDANAVGRWSRAVGRTLDRGATAEDMRRGHAAIAEFADYVERALA  
ERREDGADLLALMLAAHRSQLMRNEIVSTVVTFIFTGHETVASQLGNGL  
LSLLDHPEQLELVRRQPHLVPPQAVEECLRFDPVQSNTRQLAADVELHGR  
RLRRDDVVVVLAGAANRDPGRYDRPDELDIRRDVPVPSMSFGAGMRYCLGS  
YLARLQLRTALGAMVALPDLRLVCNPNELAYQPRTMFRGLTRLPVAFTPA  
G

>CYP105W2 (2515988844) *Salinispora arenicola* CNH905

MTGYQDRPTGDQPGAPVPSGSTDPGIGAFPLPRRCPPSPPAEYARLRAEH  
PVVRLPMLGGDTAWVVSRAHADVRLSDPRMSADRRRPGFPKFAPTTEGQ  
RQASFANFRPPLNWLDPPEHAICRRQIVDEFVRRVRQSRALVERVVDTH  
LDALTAAPGADLVSTFAYPVPSQVICEVLGVYPYGEHEFFERRSTLMFR  
STPADERARCARERIRDFLDVVVTDKEHRPGDDVLSRLLYRQRRAGGVDHE  
AVVSMAFVLLVAGHVTTSNMLALSVLALLTHPARLARLRAEPPERFPAAVE  
ELLRYFTVVEAATARTATAEVTIGGVTTAAGEGVVAVGQAANRDPVFEH  
PDEFDPDRDARAHAFGHGRHICPGQHLARLEMEVALSRLFRRLPGLRLT  
MEVSDLPLKEDSNIFGLYALPVAW

>CYP154M13 (2515988857) *Salinispora arenicola* CNH905

MSTGRPVVLDPTGRDIHGEADHLRALGPATLVELPGGVLAWSINSYEVGK  
ALLSAPNVSKSARRHWPAYFNGEIPPDWEMISWVAMDNISTTFGGDHRR  
RRLTAKAFGSRRAEQVRPMAHVMNTLLDRMADAADAGEVVDLKAAFAYP  
LPGMLVAELIGMSEEARVAAKVIDMMTATNITPEQAQGVLLGWRDAITD  
LIALKRAQPGDDITSDLIAARDEDGSLLTEQELVDITIFAILGAGSETTIN  
FFDNAITQLLTHPEQLELVKSGQVSWDDVIEEVLRLSPLASLPMRFAVE  
DIQLDGVTIHRGDPIILINYAALGRDPALHGESAGVFDVTRQHKEHLSFGH  
GAHYCLGAGIARMVAKTGLSALFERFPRMTLAVSAKDLVPYPTFIMNGNR  
QLPVHLSGALTWREGEQSALGRA

>CYP154M21 (2515988858) *Salinispora arenicola* CNH905

MEKCPYVLDRAGSDIHKEASNLARGPVTLVELHGGYTAWSVTSYEVAKQ  
LLMDPRISKNTKAHWPEFRDGNVPQDWELYTWVAMDNMQTRDGKEHDLRL  
KLVAAPTGRQAVKSRPIIEEIVNRLDDLETAAPRGQAVDIKARYFYPLS  
TILVCDLLGIAEEDRDVILHGNVNSKTTNTAESEANLHQWQTALGRLV  
ETKRRDPGDDLTTVIIKAGEDEQTPLTDDEVIGSLHLLIGGGTETTANVL  
CHTVVDMLTHPDQLAMVRSGAVSWESAWEEVVRKDGAVGSMPFRCATDDV  
EIGGVTTIAKGDVLVINYAAAGRDPERYGDAAAEFDITRADKANLSFGYGR  
HRCLGPALATMEAMVALPALFDRFPNLALAVPPNELKPQGTFFVNGYAEV  
PMLLRS

>CYP105CP2 (2515988980) *Salinispora arenicola* CNH905

MTKSMPVQDLPAFPIPRECPYRPSAQHVSLRSGGPMKVRVLYNGRTAWLV  
TDSAHAARAVLSDYRRVSIKPYHGNYPLLNEEFKVVDSGYADVLFVGDPP  
EHTRQRQMIMPSFTLRRTAVLRPDIQRIVDDKLDEMRRHGAPGDLVTEFA  
QPVPSPMVISFLLGVFWEDHEEFETPAHKLFPVELAEAEATELGAYLERLI  
QKKEQPGGTPGGTGLLDDLIRDHLRAGALSRLDELVHIAMAMLVAGTDTT

NVISLGLTALLDNDPDQWAALRDNPDELIPGAVEEILRYTSLIEAFARVAV  
SDIELNGAVIKEGEGILISSAGVNFDPALAPDPGRFDIRRPFRPSFSFSH  
GIHRCPGDNLARLELEIAFRSLVTRMPNLRRTAKPIDQIPSNNDGTLQRL  
YELPVVW

>CYP105CN1 (2515988982) *Salinispora arenicola* CNH905

MAAPAPQATPSTTTPHPPSYPLPRECPYRPSAGTAHLRDAGPVSTVRLYDG  
RTAWLVGTGAEEARALLADSRVSNRADFPNYPVMDERHLSMRATREMAREE  
EGGFAAALFGMDPPEHTRQRLPRFTVRQVAARRSAIQRIVDEHLDAM  
EANGSPADLVSAFATPVPTMVVCTHLGVQYQDRTRFEPVAVAGLFEPDRAD  
AAMAELTAYLHQLIETKQSEPGDGVIDHLIANHLRPGAIDRAELVAIASA  
ILVAGTVTTSSAIALGTLALLTAPGQYTALVDNPDLPVGAVNEILRYLSL  
VEQLARVATEDIEIGGKLIRAGDGIIVSFAAGNLDPNVTTHPDRLDVALP  
PTNHLAFSHGIHHCIGQNLALLELDIAFRALVSRFPTLRLAVPAEQLPY  
FAGDVPRLACLPVTW

>CYP107FS2 (2515988983) *Salinispora arenicola* CNH905

MPVPQGEQNLTTTEVFADPKALFATLGSRQPLHRISLPDGMFAVLVTGNRE  
ARQALSDPRLVRSITAAAPELHKYHPLASDDYALSRHMLFADPPDHGRMR  
KLVSTAFTRRRRVEQMRPRIQQITDDLIDVIAAKGEADLVETLALPLPIAV  
ISEMLGVFPFADRSEFERHAEVLTGINASSGFDAAIAAGRWFDEYLAGLVQ  
QRRREPQDDLISGMLAAQDKGDRITDVELRSNALLLSAGFETTVNLIAN  
GLLALLRHPEAAMAALRSEPNLMTTAVDELRLRYDSPVSCVTYHFAQEPVEI  
GGFEIRSGEHVIVAAAAANHDPTVFAAPSRLDLRREGSGQILSFSGIHF  
CLGAPLARLEGEIAFGTVLRLAGLRLAVPTDSLWKASFVLHRLRLRPV  
TFTPDRDPNPIDSVHTV

>CYP125G6 (2515989325) *Salinispora arenicola* CNH905

VPTLLNEHVSYDGAAIAIVDSGATSWIRLAERVNRWVHLLRAHGLDTGD  
RLACVTGNRRTEFEVLLAALHTGVTVPVNWHLTVTEIGHILSDSGSRVV  
ITEELHVKAFAAAADGTAGPVAGLVLGDRVEGFAAVEPLLAASPAEPE  
GQVCGATMLYTSGTTGRPKGVVNNLFVTGAPYARVGRLCDYARSVLGVPR  
RERMLLDGPWYHSSQLFFALLSLLQGSRLVIRPYFDPAATLKTIDDHRIT  
VTHLVPTQLVRLLRVDALTRQMFSGASLRRVWHGGGCPPEVKRSMIDWW  
GPVLVEYYYGATEGGVVTLIDSAEWLARPGSVGRAVPPSEVVVVDDGGQPV  
AAGQTGQVFFRRRTGNRFHYHNAPEKTQAAYLAPDTFTYGEVGHVDEGY  
LFLTGRAQDMIVSGGVNVYPAEVEAALLRHPVVRDAAVIGVADDEFGERV  
VGIVVPETAVDPDDLATHLDAHCRVSLAGFKVPRTYRVVESLPRDETGKL  
RKDALRSKFGWLSGAAMTVPRPATGQPTAHRPDIAHPTTYVSGVPHDEFA  
RRRRDEPVGWAEPLVTRHTAAGRTATRGSGFWAVTRYEDVVAASRRVTD  
FSSAAKGAFLLTDPRTPADLQQAQQLLVNMDDPHHARLRKLVTSTVFTPRAV  
RGLLASIDAHAAALVAKVVAAGEFDVVTDLAAELPLLVLADLLGVPKQDR  
ALLYGWSNHLVGFDPDFGGGDIDAYRTAMAEAFQYALNLGVERRARPTD  
DLVSLLANAEVDGTRLTDREFCNFWLLLVVAGNETTRHLIAGTMQALTEH  
PGECARLVEGRVPMESAVEELLRWVTPIMQFRRTATRDTEIGGQAVTAGE  
KVVLYYTSANRDATVFAEPDRLDLGRTPNRQLSFGIGPHYCLGAHLARAE  
LTALLRVMSPHLGLSLQLTGPVSRLASNFVNGVKAMPAVIGSR

>CYP154M15 (2515989350) *Salinispora arenicola* CNH905

MNDKCPFAALDVTGQDLHGEEARLREQGPAVLVELPGGVKAWSINRYEVI

RELLMDRRVTKNARKHWPFAFIKGEIPPDWEMISWVAMDNMVTAYGKDHVR  
LRKLVGRAFTQRRADALRPQVVALSTKLLDDLGA TPPEVVDLRERFAYP  
LPAMLVASLIGMSEAALAACSKVIDMMVHTNVSPEEAQAVLRGWRAAMAD  
LIESKRRTPGEDITTDLIAAREEDGSRLSEAEADTIFAILGAGSETTIN  
FFDNAITALLSRPGQLQLLRTGGVTWDDVIDEVLRVESPLAHLPLRYAVE  
DIELDGV TIPQGDPILVNYAAAAGRDPALHGGTADEFDLARGDKTHLSFGY  
GPHYCLGAGIARMVATIGLSMLFERFPDL SLAVPVTTELKRLPTFIMNGHQ  
TLPVRLTAHAR

>CYP105AB8 (2515989575) *Salinispora arenicola* CNH905

MTETASSRLTDTEFPVQRECPFAEPVEYEQIREQSSIAMVRLTGGEAWW  
ISGHEQGRAVLADRRFSSDRKANFPFVSTDPAIRKRLHAQPLSLISMDG  
AEHTQARRALIGEFTVRRLAALRPRIQQIVDQCIDEMLT TDQHCADLVKT  
LSLPVPSLVICELLGV PYADHDFQEHTATLVRRNTASEVRQHSIDELNA  
YLGALIDRKLASPD DDLGRQIARQHRDGTFRSSMVSLAFLLLVAGHET  
TANMISLGVVGLLQHPEQLAMIKDDPKTPLAIEELLRFFTIVDSVTSRV  
ATEDVRFGDTTINAGDGVVVSGLSADWDPTVFADPDRLDLERGARRHHLAF  
GFGPHQCLGQNLARLELQIVFDTL FHRIPTLRLAAPLDKIPFKTDAAIYG  
ARELPVAW

>CYP105J3 (2515989731) *Salinispora arenicola* CNH905

MTDSVAFPQGRVCPHQ PAPGYRPLAVQRPLAQVTLYDGRRVWAVTTRDLA  
RRLLVDPRISSDRTPAWPAIVPIVAAA VNDAAQQKVLKIATALVGT DGPE  
HKAQRKMLIPSF TFRMNALRPMIQEIVDQQLDEMIKSGAPTDLIPAFAS  
AVPVTVLYRLMGIPDDDHGIF EKL SHQLLAGPNANEAYDQLMGYMSRLIA  
ERRRNPGEGLVDDLLAQHGANDDADHDELVSTLVVQVAGNHGTTGSMIAL  
GLFALLQHPEQLAELRADPSLMPTAVDELLRFLSVPDAVTRLAADDIEVE  
GTVIRKGDGVFFITSLINRDTDVHDAPNSLGWHHSAADHLTFGFGAHQC  
LGQSLARITMEIALGALIDRLPSLRLAVPAEEVPFLPAASLQVIAELPIT  
W

>CYP105CH1 (2515989799) *Salinispora arenicola* CNH905

VSSLPLPTYPKLRDPADPLLPPAEYLAIQSEKPIAKVLLPSGRPTWLITG  
HALARQVLTEPCVSVDRRH PNFYPVPNPDAVVAQVARWTY ILLGDDPPL  
HTERRRL LISEFTVRQAQAMRPRIQQLVDFHLEQLIAAGPGADFSKHFAM  
KVPSAVICEM LGVPFADHDYFQERTALQLRRDVPVAAQKQAIDELLAYFE  
QLIQEKSSHGDDVLSRLIVSNRETEAFDHEALVALG LLLL VGGHETTAN  
TLTLATATMLERPEIAEQLR TDPSLMPSAVEEFLRYFSVAVAVSRIATAD  
LQVGGQLVRAGESM LLLV LNTIARDGTVFPEPHRLDIRRNARNHLAF SHGI  
HOCMGQNLARVEMQIALD TVLRRLPGLHLVTPFEELPFKYRHLVWGIEEL  
RVAW

>CYP107AY13 (2515990293) *Salinispora arenicola* CNH905

MFS AVRPSV VRAHQFRPAVATMTWETVMTAELTPIPRSSARLGQEYDQLR  
KTGDVHQVLLPDASLAWLV TNPDVAARALADPRLALNRRNSRGGWSGFAL  
PPALDANLLNLDAPDHTRLRRLVGPAFSPQRVAALRPGIRRAAEHLLDTL  
VATS RPTDLVTGYCNPLSVQVIADLMGVPEAGR TNLRAWTD TMLTSYPPD  
RDAIRQAVTELHG YVVDLIDLKQQQPGEDLLSVLV TIEQDGDRLTRDEL T  
SLAFLILFAGYENTANLIASAVLWLLDHGGLNVVPISEAIEATLRHEPPA  
PVAIRRFPTEDI IIGGV TIPAGDTVLLSIAAATRGADGNAARLAFGNGPH  
YCLGAALARIEAE EALTVLARRLPGLTLAVPPAQVRWRPTFRTHGPAELL  
VGW



>CYP107AX14P (2515990616) *Salinispora arenicola* CNH905

VTSPPHVAFGHLLLRDPHGQYNALRGQAPVHHIRTPDGAPAWLVMRYHDV  
QAALTDLRLSVDKRFSDTDGEHGSSLPELDAHLLNRDPPDHTRLRLRLAA  
AAFTPRRVADQAPAVATIVDALLDGIADQDQAEILIGALASPLPLQVMHEL  
LGLPTQTSVDFRNWTNTLLSADANQPAQSRSAMATMRRFLMGQLARKRAQ  
PGDDLLTGLLAARDDDDRFTDDELLAMVFLLMFAGYDNTAALIGNVTHAL  
LTDAGLHDAVRAGSVDLDSVVDEVLRWNPSFPLAVRRFAREPVTPSRQAI  
ASGSAWPARTATPHSSPNPTN

>CYP1198B1 (2515990920) *Salinispora arenicola* CNH905

MSGELTDQRTAPGAGGNPLRSLMDHGIRANPYPLFGELREAGPTAVEDGS  
VVLFGHEYEHCSQILRHRDMGSDTSEAPSIKGFVVDDAERAGSSIFFMDQP  
GHGRQRKLVSFSFTPRIVKSFGPQIITHIVDGLFEDFRDKGELDVVTDLAY  
PVSIGIICDLFGIPDDERDMLKEWSDDLALSTELPTLGAAIGVLNVFTRD  
EINRFGSVMAAHAYFADLIHRRRKNPGDDLVSLLATESNGERLTRFEV  
TSVLATLFVAAHESTTNLISGGILALLRNQDQMAVLRENPGELITNVVDES  
LRYDPPVHLAARMARARTTIGGYDLDPGTIVVVLMAAGNRDPRAYENPDV  
FDVNRKIRNVSLAFGAGAHFCIGSGLAKLEAEIAISAFQRLKHPEVDES  
SLEYRRHIVVRGLEHMKVSFQP

>CYP107AW7 (2563524683) *Salinispora pacifica* CNY363

VETVTGTSTPPPVPYIADPYPTLARIRANGPVSILHSDEGIPMWVIARYR  
DVRAALADPRFGQDARRAQALADNRVAGVTLGGDIVHMLNSDPPDHTRLR  
RHVQGAFTARRVAAMRPLVERITTSLLDGLTGRTTVDLVQDFAFPLPMLV  
ICELLGFPAEERNAYRSWSTAILTHDDDPAAAFATALREMTDYIAVQLRIR  
QTRPGDDILTELLAARDAGQLTDDEIIGMVFLLLIGGHETTNNLGTATL  
ALMRNPDQHRWLLANQHALPEAIDEFLRYESPVAMATLRFTTTPVAVDDV  
VIPAGELVLVSLGGANRDHDFPDADRLILDRRDTGHLAFGHGLHRCLGA  
FLGKLEGEVALGALLRQHPKLALAAEVRQLRWRDTIMLRGLDSLPLVSLHG

>CYP208A22 (2563525001) *Salinispora pacifica* CNY363

MTVIADRGGRIPPGPPVTAGLRLLALGRDRLGMMTSAAA EYGDVARLPV  
GPKKLYFFNHPDHAKHVLADNHANYQKGIGLVHARRALGDGLLTSEGELW  
RKQRRAIQPAFQNRRLAQYAGAVGQEATRLVARLATRVDPVPDVLDEMT  
RLTLGVLGRTLDDAELTGFGHVGESFAAVQDQAMFELETNTVPTWIPLR  
RQRRFRRARQHLQEVVDVLA AERGQAVEGRDDVLSRLILSTRAEADPQLG  
RERLRDELVTLLLAGHETTASTLGWSLHLLDQHPELRERVRHEARTVLGD  
RVPAYEDLHQLRYTAMVVEEAIRLYPPVWILTRKARAEDEIGGYRVPAGA  
DILICPYTLHRHPRFVAEPRFDPERFDPSTTDRPRYAYIPFGAGPRFC  
VGNNLGMLEATLVLA VLLRDLRLEGLPGRAVVPEPMLSIRVRGGLPMTVR  
RVD

>CYP125A65 (2563525090) *Salinispora pacifica* CNY363

MTEPRIPVGFDFTDPAVLERRVPREEFAELRRTAPVWWNVQPRGSAGFDD  
DGYWVVTRYADVMASRDSETYSTRENTAIARFQPGTTQADREMQRVIMI  
NVDPPEHTKLRAIVSRGFTPRAINALRGSLAERAERIVRDAAVRGTGDFV  
TDVACELPLQAI AELIGVPQHHRKVFWDWSNQLIGYDDPAYGVDPMAAAA  
ELLAYAMEMANERQRNPSDDLVTCLVNAQIDGEHLTTDEF GFFVMLLAVA  
GNETTRNAITHGMLAFLEHPDQWELFKAERPRSAVEEII RWATPVNVFQR  
TALVDTTLGGQAITAGQRVALFYGSANFDES VFEDPERFDITRSPNPHLG  
FGSGVHFCLGANLARLEIELIFNSIADHMPDIRKVADPQRLRSGWINGI  
REMPVRYR

>CYP211B11 (2563525604) *Salinispora pacifica* CNY363

MDASEAVALLMSPPGRLDPYPTYERLRAHGPVVSTAAGFFVVTGYTEADT  
VLRSPRFGVMDDEERDGAFFHWQDSPAMTSSSRSMIRANPPDHSRMRRRLA  
AGVFTPRRVAALREVVAQAADGLVDEMIRAGRGGAAVDFMGSFAYPLPVT  
VICALLGVPTADWARFRHWASDLTGVLPELTPQELAIADAGASELRDYF  
TELIAQRRRAPADDLTALVQAHDADGDRLSGEELLANLVLLLVAGFETT  
TNLLGNGLVVLLTHPDSATALRGKPELAPDYVEEFLRYDSPVQLTSRTVR  
ESVSLAGVELPAGSWLLVLLGAANRDPARFTDPARFDARRAQSPPLSFGA  
GAHYCLGAGLARLEAQVAFPLLLRRLPELVLAGEPTRRHRLTLRGYETLP  
VTVGAVPADPGTPAEVALGTP

>CYP1005A6 (2563526301) *Salinispora pacifica* CNY363

VSAVLFRSWTKTAGTHWPAVTRVADQQGTEHLVVTEHALVRQVLTDQMTY  
RPDNALDAVTPIPVAALRVLAGHRFRLPPTLANNGGVSHPAIRALVADAL  
HPAKVAAQRPWLTTELVAERVAAIRATLDSGGSADLHAELSADLPLLVLAR  
LVELPDAPVSAVKQFARAALFVWAPLDADRQLALADEVGQFHQVLRIFA  
DTGGGLAAALRATGHPPDVLVGALFFLLVAGQETTSQFLTLLHRLAGEP  
TVRAALRDGSVSVPNVVEEGLRLEPPIVTVRRVAAVDSTLGGTAVPAGTS  
VLLWLARAGRDPAIVSAPDEFPRPGQQGSRRHLAFGAGAHRCCLGDQLARME  
AAVVVEQVSPLLDGVTVVRAPWYPDNLTFRMPDAFVIRRGPAAGAAER

>CYP105H11 (2563528215) *Salinispora pacifica* CNY363

MIDTAGQLVVDVFLRKEGESFPPPRYAEYRQRDGLVLSYLPDGKPVWLVT  
RHAAREILTSRKVSSNPDHKGFPNIGETMGVPRQDQIPGWVFGMDSPDH  
DRFRRALIPEFTVRRVREMRPAIQGVIDTVIDDLLANGPEADLINDFALP  
IPSLVISALLGVPTVDREFFESRTRTLVAVRASTDQERDTASRELLRYIN  
RLIEIKSKWPADDLPSRLLANGVLHPQELSGVLLLLLLIAGHETTANNIGL  
GIVSLENPQWIGDERVVEELLRLHVSADLVSLRVAVEDVEICGQVIRAG  
EGLVPLVAAANHDES VFACPHMFNPERSARQHVAFGYGVHQCCLGQNLVRV  
EMELAYRTLFERIPGLRLTVDDGLPFKYDGVHLHGLHALPVRW

>CYP247A7 (2563528486) *Salinispora pacifica* CNY363

VRLTPGAARDIDLDSVNLFDLDLYTSGDPHPIWDMRAQSPLHHQVLADG  
REFWSVTRYDDVCRVLGDYREFTSERGTVVTHLGEDDIAAGKLLTSTDPP  
RHTQVRRRAIGAKLTARAVASWQDRIRDAIVRFLEPALDGDTFDLAEQALL  
LPAIVTGPLLGI PERDWQELVQLTAMVTAPSDPHFQHGSEAATLAISHHE  
LVITYVTEWVKQRRSAGGGDGSLLDHLMSVRVGGAPLTDEEIALDGYSILL  
GANVTTPTHTVSGTVLALIERPEQFEKAQADPSLLANLVEEGLRWTSACN  
FMRYALNDTRIGGGTVPAGGAVVAWIGSANRDESYFPDPHQFDITRSGAN  
RQVAFGFGPHYCIGAPLARMTLGIFFEELVQRFSGSIELAGEPQHLSYFI  
AGMTHLPIVAQKRKTP

>CYP161N4 (2563528578) *Salinispora pacifica* CNY363

VNTVAQLPFTQTHVLDVAPALRLLQSRGKVHRVRTPEGVPAWLVTGHAEV  
QQLLDDDRLSRSDPGGRDGGTALLNKLLGPLADDHPRLRSLLFPQFTPER  
LEPLRAVVEKLTEQHLDELAARTPPVDLRPTLAMSPLPILVLCEWLGVPAE  
DKGRFSVWTQDAAGVQDPERSQRGLAELFGYCRQLVAAKRQDPGDDVISR  
LIATAGIGDTEVVALTALLLFGGYETTAVARIGTGVLNLTNPQWAAVRA  
DPALVPATVDELLRRSMFPNHNHGMPPFAVTGFEIDGAAIRAGELVLLNI  
IAANHDETAFFDPDLRLDITRPTAGSLAFGYGRHSCVGAPLARMVLRVALS

RLITRFPDLRLAVGVDELKLRHETLVGGGLVELPVTWGPR

>CYP2054A3 (2563528583) *Salinispora pacifica* CNY363

MSISADSEQVQGRFPDPYGAHRDDPYTFLAGLGVFYAPLLDAWCVTRED  
MVAVLRDDRSFSARDHNPRPAVALPDDVNQMFRWTWRGAGAVAVGSLDPPA  
HAKIRDVLNIGFTPARVRAFEPTMRAVAADLADRIGDEPEFDFIADFAPV  
FALEVIGRRLGVPDDYLDRCRTWSEQRIELMMAQGDADHDRLREFARGLM  
EFGEFARSLVRDRVADPRDDLISELLHDGKAGRTLTADEVAVQIPTLIFA  
GHMTCAEALGTIFYQQLRSPGGWARVVDRTIPVGDVVEEGLRFDSPLAGM  
YRTATRDVTVGGIRLTAGSRLLLLYGAAGRDSRAHACPAAFRPGDGSSGH  
LAFGHGHIHFCLGAGFARAELRVAVEVLAARMPDLGLAPGRPPRFRPVFPL  
RALTEL RVTRSGGGSGP

>CYP107FH3 (2563528588) *Salinispora pacifica* CNY363

VPIELDEAFVQDPYAVYEKLRAEGPAHRVRMPPGVPLIGGLPVWLITGYD  
AVRAALADSRLSTDHLRIDGLFAQKDPDRSHRGGFSSALASHMMHTDPPD  
HTRLRKLVSKAFTTRAIEALRPRIQQTTDELTAELAGHDTVLDLLDAFAFP  
LPIRVICLLLGVPAEQENFRSWSRALVSGHSPEAAATAATEVAAYLGDL  
VERKRHATTDDVLTALVAHDVDDRLTHTELVSTAYLLFIAGFETTLNAL  
GNGTLHMLHRDQWTALRADRALLDNAVEEFLRLESPLKHATFRCATESL  
RIGDAEIAAGDFVLLAIASANRDPRRFPDPHTLDVRRPAAGHLAFGHGHI  
HCLGAPLARVEVRMAFDALLDAFPDMRLATDPAGLRWRNSTIIRGLDSL  
VHLNN

>CYP105AB28 (2563529195) *Salinispora pacifica* CNY363

MTETASTTTPGISSTTTSGPASGEVTDAEFPVERGCPFSTPSEYEQIREH  
SPLAKVRLTTGREAWWIAGHELGRAVLADRRFSSDRRDNFPFVSTDPE  
RKQLQDQPTSMIGMDGAEHAQARRALMGEFTVRRMAGLRPRIQQIVDQHI  
DEMLSSDQRTADLVEALSPLVPVSLVICELLGVYPYADHDFQARSGLIRH  
TTPTEVRLRIQKELNTYLALIDRKVADPTDDLRSRQIAKHHAAGTFDRT  
SLVSM AFLLLIAGHETTANMISLGVVGLLQHPDQLAMIKEDPEKTAPAVE  
ELLRYFTIADTVTARVATEDVQLGGTTINAGDGVVISGLAADHDPTVFTD  
PDRDLERGARHHVAFGFGPHQCIGQTLARMELQIVFDTLFRRIPTLRLA  
APLDDIPFKSDAFVYGAERLPVAV

>CYP107E37 (2563529366) *Salinispora pacifica* CNY363

VTIDQEIREYPPFRESRGIGIDPTYELLRRTEPLARVQLPYGEVSWLVTRY  
EDVKT VLTDPFRSRAAAQKQDQPRTRAEMTYEGII GLDPPDHTRLRLLAG  
KALTARRVN A IRADAQRIANEYVDEMIAKGSPGDLVELFALPYPVTVICE  
LLGVFPFEDRAQFRIWTEGLTSTSEQLMVYAEQLFDYMGKLVAQRRAEPTD  
DLLGALVKARDEGDRLTEQELLSIAGVGLLLTG VETVSTHIPNFVYALLT  
HPELMAQLRADRS LVPAAVEELLRMIPLNPAAMFP RYAVEDVTLSGITVR  
AGQPVLVSLPGANRDPEVFENPETFDFTRDQNP H VAFGHGPHHCLGAQLA  
RMELQVALHTVLDRFPDLRLADGDEGVSWKSGLLVRGPSRLLVGV

>CYP146A5 (2563529648) *Salinispora pacifica* CNY363

MTIDLANPDLYTTDARFDMWDEYIRSDAKVWSEPGFSPSGFWSAFSHRDV  
SAILSPKAPFTSQYGMIGFDADHADHSGGRMLVVSEGRWHSILKRLIGP  
FLSRLRAAE LRSVLHQEVREVIERLHAEDTTDVALTVGPRLPAAIVCEVI  
GVPLSEREHLIQLTNHAFGGEESFDMKTPAEAHTEILFYFHELIGRRQK  
KPETDLVSALLADGRLSTEDVLINCDNVLIGGNETTRHSITGAFHAFQLF

PKALDALSADPQLADRTVEEVVRWTSPAHVLRVATKDCEIGSQKILKGQ  
AVVAWLAAANRDERPFSDFPHRFVPDRAPNRHLGFGTGPHHCLGAALARLE  
LKELLTQLAAEARAVEPHREVRWMRNLVQGYSNLEVSMKWR

>CYP107AY9 (2563529747) *Salinispora pacifica* CNY363

MVATGSPVDLVTGYCTPLSVQVIADLLGVPEAGRTDLRAWTDMLTSYPP  
DRDAVRQAVVELHGYVVNLIKAKQQRPGDDLSSALVATEQEGDRLTRDEL  
TSLAFLILFAGYENTANLIASVLRLLDHGSLRGVRVSEAIEETLRLEPP  
APAAIRRFPTTEMTIGGATIPAGDTVLLSIAAATRGADGNPARLAFGNP  
HYCLGAALARVEAEEAITVLARRLPGLALAVPGAPVVRWRPTFRTHGPAEL  
LVAV

>CYP244A10 (2563529914) *Salinispora pacifica* CNY363

MQDTAQANLAEAPEVRMPIELRPTDCLPELLAAARVAPVVRTPYLDQHAW  
VVCDELVKQALTHPKLGKDVALAPDWMRQPGQMVMTAMPPEYARMMVMS  
DGEHHARIRRIHAPVLSRPNTERWSERVAALVDGFLDNLDSADGTEVNLI  
TDYTHKIPLAFTAEMGLPPGAQRRLLHDITEVMLYSADYALRQQAVGELF  
EAVQEWVRDPAGLRDGVITGLLASTDGPDATVTKGEAIVWTLSLIINGYE  
TTGSLISAALYEALRRPARERPHTDEAVAAWIEETLRVQPPVPHTTWRF  
LADLDLGGYLIPRGAPVQISLAAANLDPDEDADSFDAQRRGRGHLSFGLG  
AHYICIGAPLARVQTKIALRGFLRRFPQARLSPDTAPRWESEWMIRMSVL  
PALLA

>CYP105BL2 (2518486201) *Salinispora arenicola* CNY256

MSSHSAAPDPETATPLHTLAPELTFPQFERSTPFDPQAYTELSGRCPV  
APVSMADGKPSWLITSFEGVRTTSLSDPRFSSDMSHPGFPNRTGKPVDDL  
KDTLGAMDGERHRYRRLMTGELTVRRAKAMRPVITQITDEALDQLAAAG  
PGADLVKHVAFVVPSPRVACHLVGIPLSYELFTGMAATLMDSTSSDDQFA  
ALQNMVSYFDTLVTDRHHDRDDLGHMVRRYLATGELTRDMLIRLAWTT  
MAAGQETTAHMIGLGVAALLRHPDQLELLRREPHELLPGAVDELMRYLPLI  
QFGIPRVAMDDVEVDGQTVTAGEGVVALPPLANRDPVFERPDELDVRRN  
ARQHLTFGYGPHQCPAHALARLELEVYGRLLERFPTLRLADSDADLKVQ  
DKDIMYRVSELAVTW

>CYP208A12 (2518486674) *Salinispora arenicola* CNY256

MTLDTITPRVPLGPPRTAALRMLLVMKRDRLGMLTSAAARYGDASRLPVG  
HKALWFFNHPRYAKHVLADNSANYHKGIGLVHARRALGDGLLTSEGLWR  
KQRKVIQPAFQSRRIAQQAGMIAEEAFALVERLRARAGAGPVELTAELTG  
LTLGVLGRSLLDADLAGFDSIGDSFATVQDQAMFELETNLAVPMWIPLPR  
QIRFRRARRKLQAVVDTLVDGRAGNLADRVDVLSRLILSARGEADPRVGR  
ERLRDELVTLLLAGHETTASTLGWTLSLIDRHGPVWERLHAEAVEVLGDR  
LPEYDDLRLRLRYTVMVVEEAMRLFPPVWLLPRRALAPDTIGEYRVANAD  
VVISPYTLHRHPEFWPNPERFDPERFAPGQAADRPRYAYLPFGAGPRFCV  
GNNLGMMEAVFVIALLCRHLRLTGVPGYRLVPEPMLSLRIRGGLPLVVRP  
VS

>CYP107AY2 (2518487661) *Salinispora arenicola* CNY256

MTAEPTPIPRSGARLGQEYDQLRKTDGVHQVLLPDASLAWLVTNPEVAAR  
ALADPRLALNRRNSRGGWSGFALPPALDANLLNLDAPDHTRLRLRVGP  
SPQ RVAALRPGIRRAAEHLLDTLVATSGPTDLVTGYCNPLSVQVIADLMG  
VPEAGRTNLRAWTDMLTSYPPDRDAIRRAVTELHGYVVDLIDIKQQQPG  
DDLSTLVTIEQDGDRLSRDELTSALFLILFAGYENTANLIASAVLWLLD

HGGLNVVPISEAIEGTLRHEPPAPVAIRRFPTEDIIIGGV TIPAGDTVLL  
SVAAATRGADGNAARLAFGNPHYCLGAALARVEAEEALTVLARRLPGLT  
LAVPPSQVRWRPTFRTHGPAELLVGW

>CYP105CT1 (2518487690) *Salinispora arenicola* CNY256

MNSPNHMPADRSLTAPTSGCPMALSRGRVGLDVADEISELRDGGRLGRIT  
TAFGQEATLITRYDEVRAQMADSVVFNVAGVPSPPALVDGGFDTESVRRR  
RTVGNLIMLDPPHEHTRLRRMVAAWFTTRRVERLRPRVVEIIDAALDEMER  
SGPPVDLVAMFAKTVPITVICELIGVPEELRERYRRRAERAVSASAVSTP  
LDELRLRLREAGWVSRELIEYHRENPSDDIIGMLLREHGTDSDHDDGITDDE  
LVGLANALLIAGHETTTQMLSMGTLALLRHPDQLALLRDDPSIVAGAVEE  
LLRYVGV LHGGFVRVATRDTRLGGHRIHAGELVVPALTAANRDPRLTDTG  
DRLDITRPPTSHVAFGHGVHFCIGAPLARMELREAFPALLRRFPGLRLAV  
PDSELEFTQGT TVYSLRGLPVTW

>CYP154M5 (2518487707) *Salinispora arenicola* CNY256

VEQSCP YKLDVTGRDVHAEGEAI RARGPVAQVELPGGVQGWSVTGYQAAR  
QVLADPRFAKDPKKWPAYTSGAIPP NWPLIGWLLMDNMTNDGADHQRLR  
KLVS HGFTPRQVERTRPLIVKIVNDLLDGLSSAGPDEVVDLKGRFATPLP  
ARVICDMFGVPEALRASVLRGAQVNV TSSISGEEAEANVEQWHRELLLV  
EAKREKPD EMDASLLIAAKEEDGSTLTQEEVVGTLHLMLGAGSETLMNAL  
SYAVLGMLS NPGQYEMVRNGTSSWDDVIEETLRAQAPVAQLPLRYATEDV  
AVGGAVIKAGDPVLMGFTAIGRDP AVHGETAGDYDITREDKTHLSFGHGV  
HFCLGAPLARLELKIALPALFERF PNM TLAVRPDQLEPQGT FIMNGHREL  
PVRLGQPATVLA

>CYP211C1 (2518487885) *Salinispora arenicola* CNY256

VVDVEELLTRLYSAQGRQDPFPVYADLHAQGPIAALPPEPERRRVA AVAV  
GYDLVGAVLRDPEWSKAPPPGWTEQEILRTLQTSMMFINPPDHGRMRHVF  
AGTFTPRRLGALEPVVNRVADELDRMADAGAGGLDFVAEFAYPLPARVM  
AEFIGIPETELDWYRERVDVIDAFLDVAGKTPQRLAAANAAGAE LRAFYG  
ELLARRRRTPGEDLISGLVEAVDAGGVELTEDELVS NLIVLFNASFVTTV  
YMLS NGLPVLLAHPEVAAALATDPVLTAGAVDEILRLQAPVHLLARAAPR  
DTVLGGVPI PQGQNVLLLLIAAANRDP AHFPDPDRFDPWRSGPPSLAFGLG  
LHYCLGA AVSRLEGR LALPRLLSRF PRLRIMEQPVYSGSLFLRGIDKLSV  
SPGEGSTRE

>CYP125A41 (2518488034) *Salinispora arenicola* CNY256

MTEPRIPAGFDFTDPEVLAHRVPREFFAELRRTAPVWWNAQPRGSAGFDD  
DGYWVVTRYADVMTVSRSDTYSTRENTAIARLRPD TTREDIEMQRVIML  
NVDPPEHTKLRAIVSRGFTPRAINALRGSLAERA EHIVRDAAVRGV GDFV  
SDVACELPLQAIAELIGVPQHHRKVFDWSNQLIGYDDPAYGTDPLTASA  
ELLAYAMEMAERQ RSPSDDLVTKL VNAQIDGEHLTTDEF GFFVMLLAVA  
GNETTRNAITHGMAAFLDNPEQWELFKAERP KSAVEEII RWATPVNVFQR  
TALVDTVLGGQ AISAGQ RVALFYGSANFDEAVFEDPERFDITRSPNPHLG  
FGGSGAHFCLGANLARLEIELIFNSIADHLPDIRKVAAPQRLRSGWINGI  
RQMPVRYR

>CYP1005A1 (2518488249) *Salinispora arenicola* CNY256

VSAVLFRSWTKTAGTRWPDVTRVADQSGTEHLVVTRHALVRQVLT DQATY  
RPDNAL EAVTPIPVAAALRVLAGHRFRLPPTLANNGGVSHPAIRALVADAL

HPTKVAAQRPWLTGLVADRVASIRTTLDSSGGPVDLYADLTADLPLLVLAR  
LVELPDAPVNAVQKFARAALFWAPLDADRQLALADEVGRFHQVLREFA  
DTGGGLAAALRATGHSPDVLVGALFFLLVAGQETTSQFLTLLHRLSGEP  
TIRAALRAGSSSVADVVEEGLRLEPPIVTVRRVAAVDSTLGGTTVAAGTS  
VLLWLARAGRDPVVAAPDEFPRPGQRGSRRLAFAGAHRCCLGDQLARME  
AAVVVEQATPLLDGVTVVRPPWYPDNLTFRMPDAFVVRR

>CYP105G5 (2518488506) *Salinispora arenicola* CNY256

LTIETTETPPADDSLRAPLPRQFMQRDDPSKLPALAAAEQSPVGRSTL  
PDGDPFWMVSGYDEARAVLSDPRFSSDRFHYHPRFKKLSGQLGERLRNDK  
ARAGSFINMDPPEHTRYRKLLTGQFTVRRMRQLTVRIEQIVTEQVDVMLA  
EGNSADLVSAFAVPVPSLMICELLGVRYEDRTEFQRRRAAGLLQTDLPKQ  
AVENLEAQRAFMQRLVTDKRRTPADDMISGLVHHAGAEPPLTDDELVGIA  
TLLLFAGLDTTASMLGLGMFMLLQRPEQMAVLRDDPSRIGDAVEELLRYL  
TVVSTGLFRFAKEDVVLGDEHIPAGSTVVVSLMAANRDGRHWPEPETLDV  
TRVRSSHLAFGHGVHQCLGQQARIELTVGITELLRRLPNVRLAVPPADV  
PLRNDMITYGVHRLPILWDTP

>CYP107Q4 (2518488507) *Salinispora arenicola* CNY256

MTTTAETS AETIDLFSPEVVADPFGWYARLREETGPTTGTNLNIGTMMGGP  
EMWLVTTRYEDVRQVLTDPFRFLTNPADSPLEDIRAGVFKRLDFPPDLIPW  
MANLLNVSDGEDHTRLRKLVS YALTAHRIGKLRPRVEKITADLLDKLAED  
GKDGSPVDLVEEYCYPLPVTVICELVGIDEPDRPHWRAGDSMATMNGER  
IPTTLVKCIELARELIAKRRRAEPQDDLVTALVQAQAEQNRVSDDEIIGI  
LFSLVTAGHQTTTYLIGNSVILLLENPDQLARLKENPSMWPQAVRELQRL  
GPIQFAQPRFPSEDIELGGVTIPRGAPVAPLLLAANTDPRRFPDPNKLI I  
DRLAVGSEHGLGFGKGIHRCCLGQHLAYQEA E VALQGLFTRFPDLSLAVPR  
EEIPWILRPGFTRTRTLPLKLV

>CYP211B2 (2518489081) *Salinispora arenicola* CNY256

MDVSEAI AVLISPSGR LDPYPTYEQ LRAHG PVSRTTAGLFVV TG YAEADM  
VLRDPRFVVLDDDLRDDVFPHWQDSPA IKS IARSMLRTNPPDHSRI RRLA  
AGAFTPRRVAAMREV VTAQADEL VDEMIRAGRDGARVDFMDMFAYPLPVA  
VICALLGVPAADRSRFRRWAGDLTGILEPEITPEELAGADAGADELRDYF  
TGLIEQRRRAPADDLTALVQAHDADGDRLSGEELLANLVVLLVAGFETT  
TNLLGNGLV VLLTRPEAAAALRDEPDLAPGYVDELLRYDSPVQLTTRTVR  
ESVSFAGTELPTGSWLLVLLGAANRDPRRFPDPARFDPGRAQSQPLSFGA  
GPHYCLGAGLARLEAQVAFPLLLRRLPELALAGRPSRRTRLTLRGYETLP  
ITVGAVTADRGTPAGVAPGTP

>CYP245A7 (2518489436) *Salinispora arenicola* CNY256

MPSATLPRFALTGWSRENIVNPYPVYQRYREVASVHRGEPGGDAPDTFYV  
FSYDEVVQVLSSNCFGRGRSLDAAKASVPVPAEQKALRAIVENWLVFMDP  
PRHTELRSLLNRSFSPRIVTEL RPRIARIAQELL SRLGQQVDVDLVESFA  
APLPILVISELLGIPEERRAWLRANALALQEASSSRAGRVDVDGYAQAEVA  
AQEFTEYFREQVRLRRGRAGGDLITILANAQERGAPVSLDAIVGTCVHLL  
TAGHETTTNSLAKAVLALREHPAVLDELGAEGLTDDAVEEFLRYDPPVQ  
AVTRWAHQD TTLGGCDIPGRSRVALLGSANRDPARFPSPDVL DVRRPAD  
RHLSFGLGIHYCLGATLARAELEIGLQALLDGVP TLGYGTQHVDYADDLV  
FHGPSRLVLVNLGERCK

>CYP244A4 (2518489440) *Salinispora arenicola* CNY256

MSTTTNTELTEAPETNMPVDPGLFDCMPDLIAAARVAPVVRIPYLGRIHAW  
VVCDRELVKQALTHPKMGKDIALVPEWMRQPGMLMVTAPDPEYARAMIMS  
DGENHARIRRIHAPVLSRPNTERWGERVADKVEGFLELSQAGSGGSTEV  
NVVTNYTHKIPLAFISEMLGLPPEAEHRLRGITDIMLYSSDYAARREAIG  
GLFGAVEDWVRNPADLRDGVITGLLAASDGPDAAVTEGEVIVWTLGMIIT  
GYETTGSLISTSLYEAIRPPHERPKTDEDITAWIEETLRVHPPFPHTW  
RFPLEDIELGGYLIPKGAPVQVSIAAANRKPGEAGDSFDAERRGHGHLST  
GLGMHYCIGAPLVRLEAQIAVRGFLRRFPQARLSAETAVQWESEWMIRRM  
SVLPAVLS

>CYP105W2 (2518489600) *Salinispora arenicola* CNY256

MTGYQDRPTGDQPGAPVPSGSTDPGIGAFPLPRRCFSPPAEYARLRAEH  
PVVRLPMLGGDTAWVSRHADVRQVLSDPRMSADRHRPGFPKFAPTTEGQ  
RQASFANFRPPLNWLDPPEHAICRRQIVDEFVRRVRQSRALVERVVDTH  
LDALTAAPGADLVSTFAYPVPSQVICEVLGVPGYGEHEFFERRSTLMFRR  
STPADERARCAREIRDFLDMVVTDKERRPGDDVLSRLLYRQRSAGGMDHE  
AVVSMAFVLLVAGHVTTSNMLALSVLALLTHPARLARLRAEPERFPAAVE  
ELLRYFTVVEAATARTTTAEVTIGGVTTIAAGEGVVALGQAANRDPVFEH  
PDEFDPDRDARAHAFGHGRHICPGQHLARLEMEVALSRLFRRLPGLKLT  
MEVSDLPLKEDSNIFGLYALPVAW

>CYP248A2 (2518489608) *Salinispora arenicola* CNY256

VLADAVTAFDPTAVDVRRDPYPSYHWLLRHDPVHRGAHQVWYVSRAFVDR  
AVLGDERFARTGIRRFWTDLVGPGLLSQIVGDIILFQDEPDHGRLRGVVG  
PAFSPSALRRLEPTIEATVNDLLRPARALGAMDVVADLAYPLALRAVLEL  
LGLPAGDANAVGRWSRAVGRTLDRGATAEDMRGRHAAITEFADYVERALA  
ERREDGADLLALMLAAHRSQLMRNEIVSTVVTFFITGHETVASQLGNGL  
LSLLDHPEQMELMRRQPHLVPAVEECLRFDPAVQSNTRQLAADVELHGR  
RLRRDDVVVVLAGAANRDPGRYDRPDELDIRRDPVPSMSFGAGMRYCLGS  
YLARLQLRTALGAMVALPDLRLVCSPNELAYQPRTMFRGLTRLPAFTPA  
G

>CYP107FS2 (2518489668) *Salinispora arenicola* CNY256

MPVPQGEQNLTTTEVFADPKALFATLGSRQPLHRISLPDGMFAVLVTGNRE  
ARQALSDPRLVRSITAAAPELHKYHPLASDDYALSRHMLFADPPDHGRMR  
KLVSTAFTRRRVEQMRPRIQQITDDLIDVIAAKGEADLVETLALPLPIAV  
ISEMLGVFPADRSEFERHAEVLGTGINASSGFDIAAAGRWFDEYLAELVQ  
QRRREPQDDLISGMLAAQDKGDRLTDVELRSNALLLSAGFETTNNLVAN  
GLLALLRHPEAAMAALRSEPNLMTTAVDELRLRYDSPVSCVTYHFAQEPVEI  
GGFEIRSGEHVVIAAAAAANHDPTVFADPSRLDLRREGSGQILSFSGIHF  
CLGAPLARLEGEIAFGTVLRLLAGLRLAVPTDSLWKASFVLHRLERLPV  
TFTPDRAPNPIDSVHTV

>CYP105CN1 (2518489669) *Salinispora arenicola* CNY256

MAAPAPQATQSTTPHPPSYPLPRECPYRPSAGTARLRDAGPVSTVRLYDG  
RTAWLVTGAEEARALLADSRVSNRADFPNYPVMDERHLSMRATREMAREE  
EGGFAAALFGMDPPEHTRQRQLLLPRFTVRQVAARRPAIQRIVDEHLDAM  
EANGSPADLVSAFATPVPTMVVCTHLGVYPYQDRTRFEPVAVAGLFEPDRAD  
AAMAEALTAYLHQLIETKQSEPGDGVIDHLIANHLRPDAIDRAELVAIASA  
ILVAGTVTTSSAIALGLTALLTAPGQYAALVDNPDLPVPGAVNEILRYLSL  
VEQLARVATEDIEIGGKLIRAGDGIIVSFAAGNLDPNVTTHPDRLDVALP

PTNHLAFSHGIIHCIGQNLALLELDIAFRALVSRFPTLRLAVPAEQLPY  
FAGDVPRLACLPVTW

>CYP105CP2 (2518489671) *Salinispora arenicola* CNY256

MTKSMPVQDLPAFFIPRECPYRPSAQHVSLRSGGPMKVRVLYNGRTAWLV  
TDSAHARAVLSDYRRVSIKPYHGNYPLLNEEFKVVDSGYADVLFVGDPP  
EHTRQRMIMPSFTLRRTAVLRPDIQRIVDDKLDEMRRHGAPGDLVTEFA  
QPVPMSMVSFLLGVPWEDHEEFETPAHKLFVPELAEEATELGAYLERLI  
QKKEQPGGTPGGTGLLDDLIRDHLRAGALSRDELVHIAMAMLVAGTDTT  
NVISLGLTALLDNPDQWAALRDNDPDELIPGAVEEILRYTSLIEAFARVAV  
SDIELNGAVIKEGEGILISSAGVNFDPALAPDPGRFDIRRPSPSFSFSH  
GIHRCPGDNLARLELEIAFRSLVTRMPNLRRTAKPIDQIPSNNDGTLQRL  
YELPVVW

>CYP105AB8 (2518489824) *Salinispora arenicola* CNY256

MTETASSRLTDTEFPVQRECPFAEPVEYEQIREQSSIAMVRLTGGGEAWW  
ISGHEQGRAVLADRRFSSDRKANFPFVSTDPAIRKRLHAQPLSLISMDG  
AEHTQARRALIGEFTVRRLAALRPRIQQIVDQCIDEMLTDDQHRADLVKT  
LSLPVPSLVICELLGVYPADHDFQEHATLVRRNTASEVRQHSIDELNA  
YLGALIDRKLASPDLLGRQIARQHRDGTFRSSMVSLAFLLLVAGHET  
TANMISLGVVGLLQHPEQLAMIKDDPKTPLAIEELLRFFTIVDSVTSRV  
ATEDVRLGDTTINAGDGVVVSGLSADWDPTVFADPDRLDLERGARRHLAF  
GFGPHQCLGQNLARLELQIVFDTLFHRIPTLRLAAPLDKIPFKTDAAIYG  
ARELPVAW

>CYP105CH1 (2518490644) *Salinispora arenicola* CNY256

VSSLPLPTYPKLRDPADPLLPAPAEYLAIQSEKPIAKVLLPSGRPTWLITG  
HALARQVLTEPCVSVDRRHFNFPYPVNPDAVVAQVARWTYILLGDDPPL  
HTERRRLLI SEFTVRQAQAMRPRIQQLVDFHLEQLIAAGPGADFSKHFAM  
KVPSAVICEMLGVPFADHDYFQERTALQLRRDVPVAAQKQAIDELLAYFE  
QLIQEKSSHPGDDVLSRLIVSNRETEAFDHEALVALGLLLLLVGGHETTAN  
TLTLATATMLERPEIAEQLRTPSLMPSAVEEFLRYFSVAVAVSRIATAD  
LQVGGQLVRAGESMLLVNLTARDGTVPFEPHRLDIRRNARNHLAFSHGI  
HQCMGQNLARVEMQIALDTVLRLPGLHLVAPFEELPFKYRHLVWGIEEL  
RVAV

>CYP166A4 (2518490694) *Salinispora arenicola* CNY256

MTDAISFELPWARTDKFDPPAVFDALREQRPLARMRYPDGHVGVIVSSYE  
LVREVLGDPRFSSHSCAVGHFPVTHQGQVIPTHPQIPGMFIHMDPPEHTRY  
RRLLTGEFTVRRTSRLTGHVERVATEQIEVMRGGHAPADLVATFARPLVL  
RVLSGLVGLPYGERDRLYLHAVTLLHDAEADPAEAAAAAYEQAGAYFDEVIE  
RRRRQPEDDLISTLVGDGELTGEELRNIVTLLLFAGYETTESALAVGMFA  
LLHHEDQLARLRADPTKIDAAIEELLRYLTVNQYHTYRTASEDIELHGEV  
INKGDSVTVSLPAANRDPARFACPAELDIDRETSGHVAFGFGI HQCLGQN  
LARVELRAGLSALLRAFPNLRRLAVPADEVPLRLQGSVFVAVKNLPVCW

>CYP105J3 (2518490774) *Salinispora arenicola* CNY256

MTDSVAFFPQGRVCPHPAPGYRPLAVQRPLAQVTLYDGRRVWAVTTRDLA  
RRLLVDPRISSDRNTNPAWPAIVPIVAAAVNDAQQKVLKIATALVGTGPE  
HKAQRKMLIPSFTFRMNALRPMIQEIVDQQLDEMIKSGAPTDLIPAFAS  
AVPVTVLYRLMGIPDDDHGIFEKLSHQLLAGPNANEAYDQLMGYMSRLIA



ERRRNPGEIGLDDLLAQHGANDDADHDELVSTLVVQVAGNHGTTGSMIAL  
GLFALLQHPEQLAELRADPSLMPTAVDELLRFLSVPAVTRLAADDIEVE  
GTIIRKGDGVFFITSLINRDTDVHDAPNSLGWHHASAADHLTFGFGAHQC  
LGQSLARITMEIALGALIERLPSRLAVPAEEVPFLPAASLQVIAELPIT  
W

>CYP107EU1 (2518491001) *Salinispora arenicola* CNY256

VTIGQTLPLVVSPEFTRDPYAI FARLREQAPVCRVTTHRGMSAWMVTRH  
ADVRALLADNRLAKDGNRIGELMPRHSTLTGAATGFPPGLTTNMVNSDPP  
DHTRLRHLVGREFTGHRVEGLRPRIEEIVDDLLDGVAACGDEADLAETLA  
RRLPIAVIGELLGVPEADRAEFFRWADTLYGGTASPEALGQAYNAIVDYL  
GRLCDAKRDPADDLLTALVQVSADEDRLSREELVSMALLLLVAGHETTS  
KQISNGVLALLLNPEQLKLLKAQPARTAGAVEELLRFEGPSLSASLRFTT  
EPVEVAGVVIPEGEFVLLSLASGNRDPEKFPDPDRLDITRSTQGNLAMGH  
GIHHCVGAALARLELEIVLSRLVARFPQMQLAVEADDLEWLVNSFFRAPL  
HLPVSLRR

>CYP1198B1 (2518491385) *Salinispora arenicola* CNY256

MSGELTDQRTAPGAGGNPLRSLMDHGIRANPYPLFGELREAGPTAVEDGS  
VVLFGHEYEHCSQILRHRDMGSDTSEAPSIKGFVVDDAERAGSSIFFMDQP  
GHGRQRLVSKSFTPRIVKSFGPQITHIVDGLFEDFRDKGELDVVTDLAY  
PVSIGIICDLFGIPDDERDMLKEWSDDLALSTELPTLGAAIGVLNVFTRD  
EINRFGSVAMAAHAYFADLIHRRRKNPGDDLVSLLATESNGERLTRFEV  
TSVLATLFVAAHESTTNLISGGILALLRNQDQMAVLRENPGIITNVVDES  
LRYDPPVHLAARMARARTTIGGYDLDPGTIVVVLMAAGNRDPRAYENPDV  
FDVNRKIRNVSLAFGAGAHFCIGSGLAKLEAEIAISAFQRLKHPEVDES  
SLEYRRHIVVRGLEHMKVSFQP

>CYP105J3 (2566063003) *Salinispora arenicola* CNS820

MTDSVAFPQGRVCPHQAPGYRPLAVQRPLAQVTLYDGRRVWAVTTRDLA  
RRLLDVDPRISSDRTNPAWPAIVPIVAAAVNDAQQKVLKIATALVGTDGPE  
HKAQRKMLIPSFTFRMNALRPMIQEIVDQQLDDEMIKSGAPTDLIPAFAS  
AVPVTVLYRLMGIPDDDHGIFEKLSHQLLAGPNANEAYDQLMGYMSRLIA  
ERRRNPGEIGLDDLLAQHGANDDADHDELVSTLVVQVAGNHGTTGSMIAL  
GLFALLQHPEQLAELRADPSLMPTAVDELLRFLSVPAVTRLAADDIEVE  
GTIIRKGDGVFFITSLINRDTDVHDAPNSLGWHHASAADHLTFGFGAHQC  
LGQSLARITMEIALGALIDRLPSRLAVPAEEVPFLPAASLQVIAELPIT  
W

>CYP125A41 (2566063183) *Salinispora arenicola* CNS820

MTEPRIPAGFDFTDPEVLAHRVPREEFAELRRAPVWWNAQPRGSAGFDD  
DGYWVVTRYADVMTVSRSDTYSTRENTAIARLRPDTTREDIEMQRVIML  
NVDPPPEHTKLRAIVSRGFTPRAINALRGSLAERAHIVRDAAVRGVGDV  
TDVACELPLQAI AELIGVPQHRRKVFDWSNQLIGYDDPAYGTDPLTASA  
ELLAYAMEMAEERQRSPSDDLVTKLVAQIDGEHLTTDEFGFFVMLLAVA  
GNETTRNAITHGMVAFLDNPEQWELFKAERP KSAVEEII RWATPVNVFQR  
TALVDTV LGGQAI SAGQRVALFYGSANFDEAVFEDPERFDITRSPNPHLG  
FGGSGAHFCLGANLARLEIELIFNSIADHLPDIRKVAAPQRLRSGWINGI  
RQMPVRYR

>CYP211C1 (2566063331) *Salinispora arenicola* CNS820

VVDVEELLTRLYSAQGRQDPFPVYADLHAQGPIAALPPEPERRRVAAVAV  
GYDLVGAVLRDPEWSKAPPPGWTEQEILRTLQTSMMFINPPDHGRMRHVF  
AGTFTPRRLGALEPVVNRVADELLDRMADAGAGGLDFVAEFAYPLPARVM  
AEFIGIPETELDWYRERVDVIDAFLDVAGKTPQRLAAANAAGAELEAFYF  
ELLARRRRTPGEDLISGLVEAVDAGGVELTEDELVSNLIVLFNASFVTTV  
YMLSNGLPVLLAHPEVAAAALATDPVLTAGAVDEMLRLQAPVHLLARAAPR  
DTVLGGVPIFQGGQNVLLLIAAANRDPAHFPDPDRFDPWRSGPPSLAFGLG  
LHYCLGAAVSRLEGRALPRLLSRFPRLRIMEQPVYSGSLFLRGIDKLSV  
SPGEGSTRE

>CYP105BL2 (2566063476) *Salinispora arenicola* CNS820

MSSHSAAAPDPETATPLHTLAPELTFPQFERSTPFDPPQAYTELSGRCPV  
APVSMADGKPSWLITSFEGVRTTLSDPRFSSDMSHPGFNRTGKPVDDL  
KDTLGAMDGERHRYRRMLTGELTVRRAKAMRPVITQITDEALDQLAAAG  
PGADLVKHVAFVVPSPRVACHLVGIPLSDYELFTGMAATLMDSTSSDDQFA  
ALQNMVSYFDTLVTDREHHRDDLLGHMVRRYLATGELTRDMLIRLAWTT  
MAAGQETTAHMIIGLVAAALLRHPDQLELLRREPHLLPGAVDELMRYLPLI  
QFGIPRVAMDDVEVDGQTVTAGEGVVALPPLANRDPVFERPDELDVRRN  
ARQHLTFGYGPHQCPAHALARLELEVYGRLLERFPTLRLADSNADLKVQ  
DKDIMYRVSELAVTW

>CYP208A12 (2566064249) *Salinispora arenicola* CNS820

MTLDTITPRVPLGPRTAALRMLLVMKRDRLGMLSSAAARYGDASRLPVG  
HKALWFFNHPRYAKHVLADNSANYHKGIGLVHARRALGDGLLTSEGDLWR  
KQRKVIQPAFQSRRIAQQAGMIAEEAFALVERLRARAGAGPVELTAELTG  
LTLGVLGRSLLDADLAGFDSIGDSFATVQDQAMFELETNAVPMWIPLPR  
QIRFRARRRKLQAVVDTLVDGRAGNLAGRVDVLSRLILSARGEADPRVGH  
ERLRDELVTLLLAGHETTASTLGWTLSLIDRHGPVWERLHAEAVEVLGDR  
LPEYDDLRLRLRYTVMVVEEAMRLFPPVWLLPRRALAPDTIGEYRVANAD  
VVISPYTLHRHPEFWPNPERFDPERFAPGQAADRPRYAYLPFGAGPRFCV  
GNNLGMMEAVFVIALLCRHLRLTGVPGYRLVPEPMLSLRIRGGLPLVVRP  
VS

>CYP105CT1 (2566064332) *Salinispora arenicola* CNS820

MNSPNHMPADRSLTAPTSGCPMALSRGRVGLDVADEISELRDGGRLGRIT  
TAFGQEATLITRYDEVRAQMADSVFENVAGVPSPPALVDGGFDTESVRRR  
RTVGNLIMLDPPEHTRLRRMVAAWFTTRRVERLRPRVVEIIDAALDEMER  
SGPPVDLVAMFAKTVPITVICELIGVPEELRERYRRRAERAVSASAVSTP  
LDELRLREAGWVSRELIEYHRENPSDDIIGMLLREHGTDSHDDGITDDE  
LVGLANALLIAGHETTTQMLSMGTLALLRHPDQLALLRDDPSIVAGAVEE  
LLRYVGV LHGGFVRVATRDTRLGGHRIHAGELVVPALTAANRDPRLTLDG  
DRLDITRPPTSHVAFGHGVHFCIGAPLARMELREAFPALLRFPGLRLAV  
PDSELEFTQGTTVYSLRGLPVTW

>CYP154M5 (2566064349) *Salinispora arenicola* CNS820

VEQSCPYKLDVTGRDVHAEGEAIRARGPVAQVELPGGVQGWSVTGYQAAR  
QVLADPRFAKDPKKWPAYTSGAIPPNWPLIGWLLMDNMTTNDGADHQRLR  
KLVSHGFTPRQVERTRPLIVKIVNDLLDGLSSAGPDEVVDLKGRFATPLP  
ARVICDMFGVPEALRASVLRGAQVNVTTSSISGEEAEANVEQWHRELLELV  
EAKREKPEDMASLLIAAKEEDGSTLTQEEVVGTLHMLGAGSETLMNAL  
SYAVLGMLSNPGQYEMVRNGTSSWDDVIEETLRAQAPVAQLPLRYATEDV

AVGGAVIKAGDPVLMGFTAIGRDPVHGETAGDYDITREDKTHLSFGHGV  
HFCLGAPLARLELKIALPALFERFPNMTLAVRPDQLEPQGT FIMNGHREL  
PVRLGQPATVLA

>CYP244A4 (2566065507) *Salinispora arenicola* CNS820

MSTTTNTELTEAPETNMPVDPGLFDCMPDLIAAARVAPVVRIPYLGRHAW  
VVC DRELVKQALTHPKMGKDIALVPEWMRQPGLMVTAQPDPEYARAMIMS  
DGENHARIRRIHAPVLSRNTERWGERVADKVEGFLDELSQAGSGGSTEV  
NVVTNYTHKIPLAFISEMLGLPPEAEHRLRGITDIMLYSSDYAARREAIG  
GLFGAVEDWVRNPADLRDGVITGLLAASDGPDAAVTEGEVIVWTLGMIIT  
GYETTGSLISTSLEYEAI RPPHERPKTDEDITAWIEETLRVHPPFPHPPTW  
RFPLEDIELGGYLIPKGAPVQVSI AAANRKPGE GADSFDAERRGHGHL SF  
GLGMHYCIGAPLVRLEAQIAVRGFLRRFPQARLSAETAVQWESEWMIRRM  
SVLPAVLS

>CYP245A7 (2566065511) *Salinispora arenicola* CNS820

MPSATLPRFALTGWSRENIVNPYPVYQRYREVASVHRGEPGGDAPDTFYV  
FSYDEVVQVLSSNCFGRGRSLDAAKASVPVPAEQKALRAIVENWLVMFMDP  
PRHTELRSLNRSFSFPRIVTELRPRIARIAQELL SRLGQQVDVDLVESFA  
APLPILVISELLGIPEERRAWLRANALALQEASSSRAGR DVDGYARAEVA  
AQEFTEYFREQVRLRRGRAGGDLITILANAQERGAPVSLDAIVGTCVHLL  
TAGHETTTNSLAKAVLALREHPTVLDEL RGAEGLTDDAVEEF LRYDPPVQ  
AVTRWAHQD TT LGGCDIPGRSRVVAL LGSANRDPARFPSPDVLDVRRPAD  
RHLSFGLGIHYCLGATLARAELEIGLQALLDGVP T LGYGTQHVDYADDLV  
FHGPSRLVLVNLGERCK

>CYP166A4 (2566065813) *Salinispora arenicola* CNS820

MTDAISFELPWARTDKFDPPAVFDALREQRPLARMRYPDGHVGWIVSSYE  
LVREVLGDPRFSHSCAVGHFPVTHQGGV IPTHQIIPGMFIHMDPPEHTRY  
RRLLTGEFTVRRTSRLTG HVEGVATEQIEVMREHGAPADLVATFARPLVL  
RVLSGLVGLPYGERDRYLHAVTLLHDAEADPAEAAAAAYEQAGAYFDEVIE  
RRRRQPEDDLISTLVGDGELTGEELRNIVTLLLFAGYETTESALAVGMFA  
LLHHEDQLARLRADPTKIDAAIEELLRYLTVNQYHTYRTASEDIELHGEV  
INKGDSVTVSLPAANRDPARFACPAELDIDRETSGHVAFGFGI HQCLGQN  
LARVELRAGLSALLRAFPNLRLAVPADEVPLRLQGSVFAVKNLPVCW

>CYP1005A1 (2566066359) *Salinispora arenicola* CNS820

VSAVLFRSWTKTAGTRWPDVTRVADQSGTEHLVVTRHALVRQVLT DQATY  
RPDNAL EAVTPVPVAALRVLAGHRFRLPPTLANNGGVSHPAIRALVADAL  
HPTKVAAQRPWLTGLVADRVASIRTTLD SGGPVDLYADLTADLPLLVLAR  
LVELPDAPVNAV KQFARA ALELFWAPLDADRQLALADEVGRFHQVLR EFA  
DTGGGLAAALRATGHSPDVLVGALFFLLVAGQETTSQFL TLLHRLSDEP  
TIRAALRAGSSSVADVVEEGLRLEPPIV TWRRVA AVDSTLGGTTVAAGTS  
VLLWLARAGRDP AVVAAPDEF R PGRGSRRLAFGAGAHRC LGDQLARME  
AAVVVEQATPLLDGVTVVRPPWYPDNLTFRMPDAFVVRR

>CYP107FS2 (2566066414) *Salinispora arenicola* CNS820

MPVPQGEQNLTTTEVFADPKALFATLGSRQPLHRISLPDGMFAVLVTGNRE  
ARQALSDPRLVRSITAAAPELHKYHPLASDDYALSRHMLFADPPDHGRMR  
KLVSTAFTRRRVEQMRPRIQQITDDLIDVIAAKGEADLVETLALPLPIAV  
ISEMLGVPPFADRSEFERHAEVLTGINASSGFDALIAAGRWFDEYLAELVQ  
QRRREPQDDLISGMLAAQDKGDRLTDVELRSNALLLSAGFETTIVNLVAN  
GLLALLRHPEAMAALRSEPNLMTTAVDELLRYDSPVSCVTYHFAQEPVEI  
GGFEIRSGEHVVIAAAAANHDPTVFADPSRLDLRREGSGQILSFSGIHF  
CLGAPLARLEGEIAFGTVLRRLAGRLAVPADSLVWKASFVLHRLERLPV  
TFTPDRAFPIDSVHTV

>CYP105CN1 (2566066415) *Salinispora arenicola* CNS820

MAAPAPQATQSTTPHPPSYPLPRECPYRPSAGTARLRDAGPVSTVRLYDG  
RTAWLVGTAAEARALLADSRVSNRADFPNYPVMDERHLSMRATREMAREE  
EGGFAAALFGMDPPEHTRQORQLLLPRFTVRQVAARRPAIQRIVDEHLDAM  
EANGSPADLVSAFATPVPTMVVCTHLGVQPYQDRTRFEPVAVAGLFEPDRAD  
AAMAEALTAYLHQLIETKQSEPGDGVIDHLIANHLRPGAIDRAELVAIASA  
ILVAGTVTTSSAIALGTLALLTAPGQYAALVDNPDLPVPGAVNEILRYLSL  
VEQLARVATEDIEIGGKLIRAGDGIIVSFAAGNLDPNVTTTHPDRLDVALP  
PTNHLAFSHGIIHHCIGQNLALLELDIAFRALVSRFPTLRLAVPAEQLPY  
FAGDVPRLACLPTVW

>CYP105CP2 (2566066417) *Salinispora arenicola* CNS820

MTKSMPVQDLPAFPIPRECPYRPSAQHVSLRSGGPMKVRVLYNGRTAWLV  
TDSAHARAVLSDYRRVSIKPYHGNYPLLNEEFEKVVDSGYADVLFGVDP  
EHTRQORQMIMPSFTLRRTAVALRPDIQRIVDKLDMMRHGAPGDLVTEFA  
QPVPSMVMSFLLGVWEDHEEFETPAHKLFVPELAEEATTELGAYLERLI  
QKKEQPGGTPGGTGLLDDLRDHLRAGALSRLDELVHIAMAMLVAGTDTT  
NVISLGTALLDNPDQWAALRDNPDDELIPGAVEEILRYTSLIEAFARVAV  
SDIELNGAVIKEGEGILISSAGVNFDPALAPDPGRFDIRPPRPSFSFSH  
GIHRCPGDNLARLELEIAFRSLVTRMPNLRATAKPIDQIPSNNDGTLQRL  
YELPVVW

>CYP107Q4 (2566066510) *Salinispora arenicola* CNS820

MTTTAETSATIDLFSPEVVADPFGWYARLREETGPTTGTNLNIGTMMGGP  
EMWLVTTRYEDVRQVLTDPRLTNPPADSPLEDIRAGVFKRLDFPPDLIPW  
MANLLNVSDGEDHTRLRKLVSALTAKHRIGKLRPRVEKITADLLDKLAED  
GKDGSPVDLVEEYCYPLPVTVICELVGIDEPRPHWRWAGDSMATMNGER  
IPTTLVKCIELARELIAKRAEPQDDLVTALVQAQAEQNRVSDDEIIGI  
LFSLVTAGHQTTTYLIGNSVILLLENPDQLARLKENPSMWQAVRELQRL  
GPIQFAQPRFSEDIELGGVTIPRGAPVAPLLLAANTDPRRFDPNKLII  
DRLAVGSEHGLGFGKGIHRCGLGQHLAYQEAQVALQGLFTRFPDLSLAVPR  
EEIPWILRPGFTTRTRLPLKLV

>CYP105G5 (2566066511) *Salinispora arenicola* CNS820

LTIIETTETPPADDSLAPLPRQFMQRDDPSKLPPALAAAEQSPVGRSTL  
PDGDPFWMVSGYDEARAVLSDRFSSDRFRYHPRFKKLSGQLGERLRNDK  
ARAGSFINMDPPEHTRYRKLITGQFTVRRMRQLTVRIEQIVTEQVDVMLA  
EGNSADLVSAFAVPVPSLMICELLGVRYEDRTEFQRRRAAGLLQTDLPKQ  
AVENLEAQRAFMQRLVTDKRRTPADDMISGLVHHAGAEPPLTDDELVGIA  
TLLLFAGLDTTASMLGLGMFMLLQRPEQMAVLRDDPSRIGDAVEELLRYL  
TVVSTGLFRFAKEDVVLGDEHIFAGSTVVVSLMAANRDGRHWPEPETLDV  
TRVRSSHLAFGHGVHQCLGQQLARIELTVGITELLRRLPNVRLAVPPADV  
PLRNDMITYGVHRLPILWDTF

>CYP1051A1 (2566066532) *Salinispora arenicola* CNS820

MATDAAITRARTVPAWKALPAAVRDTHRAFVDVGNWSDGDVVRVSLGVSR  
PYLVTNPAHVQEVLEHERAAIYPRGDDTSLWRSVRKLVGDGILAEGDAAWAA  
SRRVLAPMFRPARINAMVDTMADAIAGAFDDLHGAATAGTPIDVGRELSR  
IVCSAIMRVFFADRITVRDALRIMKAQETIVTAMAPRILAPLVPWWIPMP  
GDRRFRAAVRSIDDILLPVLRLQAQRQPDDGDDLLSRLVRARADDGRALSE  
KRMRDDLVSMVAVTETSTVVLTLWLWPLLANHPDVANRLYDEIDRVVGGG  
PVRGDHLAELTYTRMVLDELLRLYPAGWILPRRAATTDILGGVRINKGAT  
VILSPYVTQRMATAWWGPTAEAFDPERFAAGREAADGRHRYAYYPFGVGMH  
RCLGEHLFNLEAILIVATLLSRFRFALTDTSMPGVKVAASTRPARTVEMI  
LKPVAPVPAR

>CYP107AY2 (2566067183) *Salinispora arenicola* CNS820

MTAEPTPIPRSGARLGQEYDQLRKTGDVHQVLLPDTSLAWLVTNPEVAAR  
ALADPRLALNRRNSRGGWSGFALPPALDANLLNLDAPDHTRLRLRVGPAP  
SPQRVAALRPGIRRAAEHLLDTLVATSGPTDLVTGYCNPLSVQVIADLMG  
VPEAGRTNLRATDTMLTSYPPDRDAIRQAVTELHGYYVDLIDIKQQQPG  
DDLLSALVTIEQDGDRLSRDELTSLAFLILFAGYENTANLIASAVLWLLD  
HGGLNVVPSSEAIEGTLRHEPPAPVAIRRFPTEDIIIGGV TIPAGDTVLL  
SIAAATRGADGNAARLAFGNPHYCLGAALARVEAEALTVLARRLPGLT  
LAVPPSQVRWRPTFRTHGPAELLVGW

>CYP211B2 (2566067319) *Salinispora arenicola* CNS820

MDVSEAI AVLISPSGRLDPYPTYEQ LRAHG PVSRTTAGLFVVTGYAEADM  
VLRDPRFVVLDDDLRDDVFPHWQDSPAIKSIARSMRLTNPPDHSRIRRLA  
AGAFTPRRVAAMREVVTQADELVD EMIRAGRDGARVDFMDMFAYPLPVA  
VICALLGVPAADRSRFRRWAGDLTGILEPEITPEELAGADAGADELRDYF  
TGLIEQRRRAPADDLTALVQAHDADGDRLSGEELLANLVVLLVAGFETT  
TNLLGNGLVVLLTRPEAAAAALRDEPD LAPGYVDELLRYDSPVQLTRTRVR  
ESVSFAGTEL PADSWLLVLLGAANRDPRRFPD PARFDPGRAQSQPLSFGA  
GPHYCLGAGLARLEAQVAFPLLLRRLPELALAGRPSRRTRLT LRGYETLP  
ITVGAVTADRGT PAGVAPGTP

>CYP105AB8 (2566067359) *Salinispora arenicola* CNS820

MTETASSRLTDTEFPVQRECPFAEPVEYEQIREQSSIAMVRLTGGGEAWW  
ISGHEQGRAVLADRRFSSDRRKANFPFVSTDPAIRKRLHAQPLSLISMDG  
AEHTQARRALIGEFTVRRRLAALRPRIQQIVDQCIDEMLT TDQHRADLVKT  
LSLPVPSLVICELLGV PYADHDFEQEHTATLVRRNTASEVRQHS IDELNA  
YLGALIDRKLASPDDDLLGRQIARQHRDGT FDRSSMVSLAFLLLVAGHET  
TANMISLGVVGLLQHPEQLAMIKDDPKTPLAIEELLRFFTIVDSVTSRV  
ATEDVRFGDTTINAGDGVVVSGLSADWDPTVFADPDRLDLERGARHHLAF  
GFGPHQCLGQNLARLELQIVFDTLFHRIPTLRLAAPLDKIPFKTDAAIYG  
ARELPVAW

>CYP105CH1 (2566067472) *Salinispora arenicola* CNS820

VSSLPLPTYPKLRDPADPLLPPAEYLAIQSEKPIAKVLLPSGRPTWLITG  
HALARQVLTEPCVSVDRRHFNFPYPVNPDAVVAQVARWTYILLGDDPPL  
HTERRLLI SEFTVRQAQAMRPRIQQLVDFHLEQLIAAGPGADFSKHFAM  
KVPSAVICEMLGVPFADHDYFQERTALQLRRDVPVAAQKQAIDELLAYFE  
QLIQEKSSHPGDDVLSRLIVSNRETEAFDHEALVALGLLLLLVGGHETTAN

TLTLATATMLERPEIAEQLRTPSLMPSAVEEFLRYFSVAVAVSRIATAD  
LQVGGQLVRAGESMLLVNTIARDGTVFPEPHRLDIRRNARNHLAFSHGI  
HQC MGQNLARVEMQIALD TVLRRLPGLHLVAPFEELPFKYRHLVWGIEEL  
RVAW

>CYP107EU1 (2566067617) *Salinispora arenicola* CNS820

VTIGQTL PDLVYSPEFTRDPYAIFARLREQAPVCRVTTHRGMSAWMVTRH  
ADVRALLADNRLAKDGNRIGELMPRHSTLTGAATGFPPGLTTNMVNSDPP  
DHTRLRHLVGREFTGHRVEGLRPRIEEIVDDLLDGVAACGDEADLAETLA  
RRLPIAVIGELLGVPEADRAEFFRWADTLYGGTASPEALGQAYNAIVDYL  
GRLCDAKRDVPADDLLTALVQVSADEDRLSREELVSMALLLLVAGHETTS  
KQISNGVLALLLNPEQLKLLKAQPARTAGAVEELLRFEGPSLSASLRFTT  
EPVEVAGVVIPEGEFVLLSLASGNRDPEKFPDPDRLDITRSTQGNLAMGH  
GIHHCVGGAALARLELEIVLSRLVARFPQMLAVEADDLEWLVNSFFRAPL  
HLPVSLRR

>CYP248A2 (2566067642) *Salinispora arenicola* CNS820

VLADAVTAFDPTAVDVRRDPYPSYHWLLRHDPVHRGAHQVWYVS RFADVR  
AVLGDERFARTGIRRFWTDLVGPGLLSQIVGDIILFQDEPDHGRLRGVVG  
PAFSPSALRRLEPTIEATVNDLLRPARALGAMDVVADLAYPLALRAVLEL  
LGLPAGDANAVGRWSRAVGRTLDRGATAEDMRRGHAAITEFADYVERALA  
ERREDGADLLALMLAAHRSQLMRSNEIVSTVVTFTFTGHETVASQLGNGL  
LSLLDHPEQMELMRRQPHLVPQAVEECLRFDPVQSNTRQLAADVELHGR  
RLHRDDVVVVLAGAANRDPGRYDRPDELDIRRDPVPSMSFGAGMRYCLGS  
YLARLQLRTALGAMVALPDLRLVCSPNELAYQPRTMFRGLTRLPVAFTPA  
G

>CYP105W2 (2566067650) *Salinispora arenicola* CNS820

MTGYQDRPTGDQPGAPVPSGSTDPGIGAFPLPRRCPPFSPPAEYARLRAEH  
PVVRLPMLGGDTAWVVS RHADVRQVLS DPRMSADRRRPGF PKFAPTTEGQ  
RQASFANFRPPLNWLDPPEHAICRRQIVDEF SVRRVRQSRALVERVVDTH  
LDALTAAPGADLVSTFAYPVPSQVICEVLGVVPYGEHEFFERRSTLMFRR  
STPADERARCAREIRDFLDMVVT DKERRPGDDVLSRLLYRQRSAGGVDHE  
AVVSMAFVLLVAGHVTTSNM LALS V LALLTHPARLARLRAE PERFPAAVE  
ELLRYFTVVEAATARTTTAEVTIGGV TIAAGEGVVALGQAANRDP RVFEH  
PDEFDPDRDARAHLAFGHGRHICPGQHLARLEMEVALSRLFRRLPGLRLT  
MEVSDLPLKEDSNIFGLYALPVAW

>CYP1198B1 (2566067930) *Salinispora arenicola* CNS820

MSGELTDQRTAPGAGGNPLRSLMDHGIRANPYPLFGELREAGPTAVEDGS  
VVLFG EYEHCSQILRHRDMGSDTSEAPSIKGFVDDAERAGSSIFFMDQP  
GHGRQRKLVS KSFTPRIVKSFGPQITHIVDGLFEDFRDKGELDVVTDLAY  
PVSIGIICDLFGIPDDERDMLKEWSDDLALSTELPTLGTAIGVLNVFTRD  
EINRFGSVAMAAHAYFADLIHRRRKNPGDDLVSLLATESNGERLTRFEV  
TSVLATLFVAAHESTTNLISGGILALLRNQDQMAVLRENPGIITNVVDES  
LRYDPPVHLAARMARARTTIGGYDLDPGTIVVVLMAAGNRDPRAYENPDV  
FDVNRKIRNVSLAFGAGAHFCIGSGLAKLEAEIAISAFQRLKHPEVDES  
SLEYRRHIVVRGLEHMKVSFQP

>CYP105BL2 (2524677481) *Salinispora arenicola* CNS243

MSSHSAAAPDPETATPLHTLAPELTFPQFERSTPFDPQAYTELSGRCPV  
APVSMADGKPSWLITSFEGVRTTSLSDPRFSSDMSHPGFPNRTGKPVDDL  
KDTLGAMDGERHRYRRLMTGELTVRRAKAMRPVITQITDEALDQLAAAG  
PGADLVKHVAFVVPSPRVACHLVGIPLSDYELFTGMAATLMDSTSSDDQFA  
ALQNMVSYFDTLVTDREHHDRDDLGHMVRRYLATGELTRDMLIRLAWTT  
MAAGQETTAHMIGLGVAALLRHPDQLELLRREPHELLPGAVDELMRYLPLI  
QFGIPRVAMDDVEVDGQTVTAGEGVVALPPLANRDPVAFERPDELDVRRN  
ARQHLTFGYGPHQCPAHALARLELEVYGRLLERFPTLRLADSDADLKVQ  
DKDIMYRVSELAVTW

>CYP105AB8 (2524677905) *Salinispora arenicola* CNS243

MTETASSRLTDTEFPVQRECPFAEPVEYEQIREQSSIAMVRLTGGGEAWW  
ISGHEQGRAVLADRRFSSDRKANFPFVSTDPAIRKRLHAQPLSLISMDG  
AEHTQARRALIGEFTVRRLAALRPRIQQIVDQCIDEMLTDDQHRADLVKT  
LSLPVPSLVICELLGVPPYADHDFEQEHTATLVRRNTASEVRQHSIDELNA  
YLGALIDRKLASPDDDLGRQIARQHRDGTFRSSMVSLAFLLLVAGHET  
TANMISLGVVGLLQHPEQLAMIKDDDPDKTPLAIEELLRFFTIVDSVTSRV  
ATEDVRFGDDTTINAGDGVVVSGLSADWDPTVFADPDRLDLERGARRHHLAF  
GFGPHQCLGQNLARLELQIVFDTLFHRIPTLRLAAPLDKIPFKTDAAIYG  
ARELPVAW

>CYP105J3 (2524677995) *Salinispora arenicola* CNS243

MTDSVAFPPQGRVCPHPAPGYRPLAVQRPLAQVTLYDGRRVWAVTTRDLA  
RRLLVDPRISSDRNTNPAWPAIVPIVAAAVNDAQQKVLKIATALVGTGPE  
HKAQRKMLIPSFTFRMNALRPMIQEIVDQQLDDEMIKSGAPTDLIPAFAS  
AVPVTVLYRLMGIPDDDHGIFEKLSHQLLAGPNANEAYDQLMGYMSRLIA  
ERRRNPVEGVLDLLAQHGANDDADHDELVSTLVVQVAGNHGTTGSMIAL  
GLFALLQHPEQLAELRADPSLMPTAVDELLRFLSVPDAVTRLAADDIEVE  
GTIIRKGDGVFFITSLINRDTDVHDAPNSLGWHHASAADHLTFGFGAHQC  
LGQSLARITMEIALGALIERLPSLRLAVPAEEVPFLPAASLQVIAELPIT  
W

>CYP125A41 (2524678166) *Salinispora arenicola* CNS243

MTEPRIPAGFDFTDPEVLAHVRVPREEFAELRRTPVWWNAQPRGSAGFDD  
DGYWVVTRYADVMTVSRSDTYSTRENTAIARLRPDTTREDIEMQRVIML  
NVDPPPEHTKLRAIVSRGFTPRAINALRGSLAERAHEHIVRDAAVRGVGDV  
TDVACELPLQAI AELIGVPPQHRRKVFWDNSQLIGYDDPAYGTDPLTASA  
ELLAYAMEMAERQSRSPSDDLVTCLVNAQIDGELHTTDEFGFFVMLLAVA  
GNETTRNAITHGMAAFLDNPEQWELFKAERP KSAVEEIIIRWATPVNVFQR  
TALVDTVLGGQAI SAGQRVALFYGSANFDEAVFEDPERFDITRSPNPHLG  
FGGSGAHFCLGANLARLEIELIFNSIADHLPDIRKVAAPQRLRSGWINGI  
RQMPVRYR

>CYP211C1 (2524678313) *Salinispora arenicola* CNS243

VVDVEELLTRLISAQGRQDPFPVYADLHAQGPIAALPPEPERRRVA AVAV  
GYDLVGAVLRDPEWSKAPPPGWTEQEILRTLQTSMMFINPPDHGRMRHVF  
AGTFTPRRLGALEPVVNRVADELDRMADAGAGGLDFVAEFAYPLPARVM  
AEFIGIPETELDWYRERVDVIDAFLDVAGKTPQRLAAANAAGAE LRAFYG  
ELLARRRRTPEGDLISGLVEAVDAGGVELTEDELVSNLIVLFNASFVTTV  
YMLSNGLPVLLAHPEVAAALATDPVLTAGAVDEILRLQAPVHLLARAAPR

DTVLGGVPIPIQGQNVLLLLVAAANRDPAHFPDPDRFDPWRS GPPSLAFGLG  
LHYCLGAAVSRLEGRLLALPRLLSRFPRLRIMEQPVYSGSLFLRGIDKLSV  
SPGEGSTRE

>CYP211B2 (2524678403) *Salinispora arenicola* CNS243

MDVSEAI AVLISPSGR LDPYPT YQLRAHG PVSRTTAGL FVVTGYAEADM  
VLRDPRFVVLDDDLRDDVFPHWQDSPAIKSIARSM LRTNPPDHSRIRRLA  
AGAFTPRRVAAMREV VTAQADEL VDEMIRAGRDGARVDFMDMFAYPLPVA  
VICALLGVPAADRSRFRRWAGDLTGILEPEITPEELAGADAGADELRDYF  
TGLIEQRRRAPADDLT TALVQAHDADGDRLSGEE LLANLVVLLVAGFETT  
TNLLGNGLVVL LTRPEAAAAALRDEPD LAPGYVDELLRYDSPVQLTTRTVR  
ESVSFAGTEL PADSWLLVLLGAANRDPRRFPDPARFDPGRAQS QPLSFGA  
GPHYCLGAGLARLEAQVAFPLLLRRLPELALAGRPSRRTRLTLRGYETLP  
ITVGAVTADRGT PAGVAPGTP

>CYP166A4 (2524678961) *Salinispora arenicola* CNS243

MTDAISFELPWARTDKFDPPAVFDALREQRPLARMRYPDGHVGWIVSSYE  
LVREVLGDPRFSHSCAVGHFPVTHQGQVIPTHPQIPGMFIHMDPPEHTRY  
RRLLTGEFTVRRTSRLTG HVEGVATEQIEVMREHGAPADLVATFARPLVL  
RVLSGLVGLPYGERDRYLHAVTLLHDAEADPAEAAAAAYEQAGAYFDEVIE  
RRRRQPEDDLISTLVGDGELTG EELRNIVTLLLFAGYETTESALAVGMFA  
LLHHEDQLARLRADPTKIDAAIEELLRYLT VNQYHTYRTASEDIELHGEV  
INKGDSVTVSLPAANRDPARFACPAELDIDRETS GHVAFGFGI HQCLGQN  
LARVELRAGLSALLRAFPNLRLAVPADEVPLRLQGSVFAVKNLPVCW

>CYP244A4 (2524679619) *Salinispora arenicola* CNS243

MSTTTNTELTEAPETNMPVD PGLFDCMPDLIAAARVAPVVRIPYLG RHAW  
VVC DRELVKQAL THPKMGKDIALVPEWMRQPGLMVTAQPDPEYARAMIMS  
DGENHARIRRIHAPVLS PRNTERWGERVADKVEGF LDELSQAGSGGSTEV  
NVVTNYTHKIPLAFISEMLGLPPEAEHRLRGITDIMLYSSDYAARREAIG  
GLFGAVEDWVRNPADLRDGVITGLLAASDGPDAAVTEGEVIVWTLGMIIT  
GYETTGS LISTS LYEAIRRPPHERPKTDEDITAWIEETLRVHPPFPHPPTW  
RFPLEDIELGGYLI PKGAPVQVSIAAANRKPGE GADSFDAERRGHGHL SF  
GLGMHYCIGAPLVRLEAQIAVRGFLRRFPQARLSAETAVQWESEWMIRRM  
SVLPAVLS

>CYP245A7 (2524679623) *Salinispora arenicola* CNS243

MPSATLPRFALTGWSRENIVNPYPVYQRYREVASVHRGESGGDAPDTFYV  
FSYDEVVQVLSSNCFGRGRSLDAAKASVPVPAEQKALRAIVENWLVFMDP  
PRHTELRSLLNRSFS PRIVTEL RPRIARIAQELL SRLGQQVDVDLVESFA  
APLPILVISELLGIPEERRAWLRANALALQEASSSRAGRDVDGYARAEVA  
AQEFTEYFREQVRLRRGRAGGDLITILANAQERGAPVSLDAIVGTCVHLL  
TAGHETTTNSLAKAVLALREHPAVLDELRGAEGLTTDAVEEFLRYDPPVQ  
AVTRWAHQD TT LGGCDIPGRSRVALLGSANRDPARFSPDVL DVRRPAD  
RHLSFGLGIHYCLGATLARAEEIGLQALLDGVPTLGYGTQHVDYADDLV  
FHGPSRLVLVNLGERCT

>CYP208A12 (2524679894) *Salinispora arenicola* CNS243

MTLDTITPRVPLGP PRTAALRMLLV MKRDLGMLTSAAARYGDASRLPVG  
HKALWFFNHPRYAKHV LADNSANYHKGIGLVHARRALGDGLLTSEGD LWR  
KQRKVIQPAFQSRRIAQQAGMIAEEAFALVERLRARAGAGPVELTAE LTG  
LTLGVLGRSLLDADLAGFDSIGDSFATVQDQAMFELET LNAVPMWIPLPR



QIRFRRARRKLQAVVDTLVDGRAGNLADRVDVLSRLILSARGEADPRVGR  
ERLRDELVTLLLAGHETTASTLGWTLSLIDRHGPGVWERLHAEAVEVLGDR  
LPEYDDLRLRLRYTVMVVEEAMRLFPVWLLPRRALAPDTIGEYRV PANAD  
VVISPYTLHRHPEFWPNPERFDPERFAPGQAADRPYAYLPFGAGPRFCV  
GNNLGMMEAVFVIALLCRHLRLTGVPGYRLVPEPMLSLRIRGGGLPLVVRP  
VS

>CYP105CT1 (2524680003) *Salinispora arenicola* CNS243

MNSPNHMPADRSLTAPTSGCPMALSRGRVGLDVADEISELRDGGRLGRIT  
TAFGQEATLITRYDEVRAQMADSVFNVAGVPSPPALVDGGFDTESVRRR  
RTVGNLIMLDPPEHTRLRRMVAAWFTTRRVERLRPRVVEIIDAALDEMER  
SGPPVDLVAMFAKTVPITVICELIGVPEELRERYRRRAERAVSASAVSTP  
LDELRLREAGWVSRELIEYHRENPSDDIIGMLLREHGTDSDHDDGITDDE  
LVGLANALLIAGHETTTQMLSMGTLALLRHPDQLALLRDDPSIVAGAVEE  
LLRYVGV LHGGFVRVATRDTRLGGHRIHAGELVVPALTAANRDPRLTGD  
DRLDITRPPTSHVAFGHGVHFCIGAPLARMELREAFPALLRRFPGLRLAV  
PDSELEFTQGTTVYSLRGLPVTW

>CYP154M5 (2524680019) *Salinispora arenicola* CNS243

VEQSCPYKLDVTGRDVHAEGEAI RARGPVAQVELPGGVQGSVTGYQAAR  
QVLADPRFAKDPKKWPAYTSGAIPPNWPLIGWLLMDNMTTNDGADHQRLR  
KLVSHGFTPRQVERTRPLIVKIVNDLLDGLSSAGPDEVVDLKGRFATPLP  
ARVICDMFGVPEALRASVLRGAQVNVTSISGEEAEANVEQWHRELLLV  
EAKREKPEDMASLLIAAKEEDGSTLTQEEVVGTLHLMLGAGSETLMNAL  
SYAVLGMLSNPGQYEMVRNGTSSWDDVIEETLRAQAPVAQLPLRYATEDV  
AVGGAVIKAGDPVLMGFTAIGRDPVHGETAGDYDITREDKTHLSFGHGV  
HFCLGAPLARLELKIALPALFERFPNMTLAVRPDQLEPQGTIFIMNGHREL  
PVRLGQPATVLA

>CYP1005A1 (2524680196) *Salinispora arenicola* CNS243

VSAVLFRSWTKTAGTRWPDVTRVADQSGTEHLVVTRHALVRQVLTDQATY  
RPDNAMEAVTPVPVAALRVLAGHRFRLPPTLANNGGASHPAIRALVADAL  
HPTKVAAQRPWLTGLVADRVASIRTTLDSSGGPVDLYADLTADLPLLVLAR  
LVELPDAPVNAVVKQFARAALFWAPLDADRQLALADEVGRFHHQVLREFA  
DTGGGLAAALRATGHSPDVLVGALFFLLVAGQETTSQFLTLLHRLSGEP  
TIRAALRAGSISAADVVEEGLRLEPPIVTVRRVAAVNSTLGGTTVAAGTS  
VLLWLARAGRDPVVAAPDEFPRPGQRGSRRHLAFGAGAHRC LGDQLARME  
AAVVVEQATPLLDGVTVVRPPWYPDNLTFRMPDAFVVRR

>CYP1051A1 (2524681157) *Salinispora arenicola* CNS243

MATDAAITRARTVPAWKALPAAVRDTHRALVDVGNWSDGDVVRVSLGVSR  
PYLVTNPAHVQEVLHERAAIYPRGDDTALWRSVRKLVGDGILAEGDAAWAA  
SRRVLAPMFRPARINAMVDTMADAIAGAVDDLHGAATAGTPIDVGRELSR  
IVCSAIMRVFFADRITVRDALRITKAQETIVTAMAPRILAPLVPWWIPMP  
GDRRFRAAVRSIDDILLPVLRLQAQRQPDDGDDLLSRLVRARADDGRALSE  
KRMRDDLVSMVAVTTETSTVVLTWLVPLLANHPDVANRLYDEIDRVVGGG  
PVRGDHLAELTYTRMVLDLRLYPAGWILPRRAATTDVLGGVRINKGAT  
VILSPYVTQRMATAWWGPAAEAFDPERFAAGREAADGRHRYAYYPFGVGMH  
RCLGEHLFNLEAILIVATLLSRFRFALTDTSMPGVKVAASTRPARTVEMI  
LKPVAPVPAR

>CYP105G5 (2524681181) *Salinispora arenicola* CNS243

LTIIETTETPPADDSLRAPLPRQFMQRDDPSKLPALAAAEQSPVGRSTL  
PDGDPFWMVSGYDEARAVLSDPRFSSDRFRYHPRFKKLSGQLGERLRNDK  
ARAGSFINMDPPEHTRYRKLLTGQFTVRRMRQLTVRIEQIVTEQVDVMLA  
EGNSADLVSAFAVPVPSLMICELLGVRYEDRTEFQRRRAAGLLQTDLPKQ  
AVENLEAQRAFMQRLVTDKRRTPADDMISGLVHHAGAEPPPLTDDDELVGIA  
TLLLFAGLDTTASMLGLGMFMLLQRPEQMAVLRDDPSRIGDAVEELLRYL  
TVVSTGLFRFAKEDVVLGDEHIPAGSTVVVSLMAANRDGRHWPEPETLDV  
TRVRSSHLAFGHGVHQCLGQQLARIELTVGITELLRRLPNVRLAVPPADV  
PLRNDMITYGVHRLPILWDTP

>CYP107Q4 (2524681182) *Salinispora arenicola* CNS243

MTTTAETS AETIDLFSPEVVADPFGWYARLREETGPTTGTLNIGTMMGGP  
EMWLVTTRYEDVRQVLTDPRLTNPPADSPLEDIRAGVFKRLDFPPDLIPW  
MANLLNVSDGEDHTRLRKLVSALT AHRIGKLRPRVEKITADLLDKLAED  
GKDGSPVDLVEEYCYPLPVTVICELVGIDEPDRPHWRAWGDSMATMNGER  
IPTTLVKCIELARELIAKRAEPQDDLV TALVQAQAEQDNRVSDDEIIGI  
LFSLVTAGHQTTTYLIGNSVILLLENPDQLARLKENPSMWPQAVRELQRL  
GPIQFAQPRFPSEDIELGGVTIPRGAPVAPLLLAANTDPRRFPDPNKLI I  
DRLAVGSEHGLGFGKGIHRC LGQLAYQEA E VALQGLFTRFPDLSLAVPR  
EEIPWILRPGFTRTRTLPLKLV

>CYP248A2 (2524681240) *Salinispora arenicola* CNS243

VLADAVTAFDPTAVDVRRDPYPSYHWLLRHDPVHRGAHQVWYVS RFADVR  
AVLGDERFARTGIRRFWTDLVGPGLLSQIVGDIILFQDEPDHGRLRGVVG  
PAFSPSALRRLEPTIEATVNDLLRPARALGAMDVVADLAYPLALRAVLEL  
LGLPAGDANAVGRWSRAVGRTLDRGATAEDMRRGHAAIAEFADYVERALA  
ERREDGADLLALMLAAHRSQ LMSRNEIVSTVVT FIFTGHETVASQLGNGL  
LSLLDHPEQLELMRRQPHLLPQAVEECLRFDPAVQSNTRQLAADVELHGR  
RLRRDDVVVVLAGAANRDPGRYDRPDELDIRRDPVPSMSFGAGMRYCLGS  
YLARLQLRTALGAMVALPDLRLVCSPNELAYQPRTMFRGLTRLPVAFTPT  
G

>CYP105W2 (2524681248) *Salinispora arenicola* CNS243

MTGYQDRPTGDQPGAPVPSGSTDPGIGAFPLPRRCPFSPPAEYARLRAEH  
PVVRLPMLGGDTAWVVSRHADVRQVLS DPRMSADRRRP GF PKFAPTTEGQ  
RQASFANFRPPLNWLDPPEHAICRRQIVDEF SVRRVRQSRALVERVVDTH  
LDALTAAPGADLVSTFAYPVPSQV ICEVLGV PYGEHEFFERRSTLMFRR  
STPADERARCAREIRDFLDMVVT DKEHRPGDDVLSRLLYRQRRAGVDHE  
AVVSMAFVLLVAGHVTTSNMLALSVLALLTHPARLARLRAEPPERFPAAVE  
ELLRYFTVVEAATARTATAEVTIGGV TIAAGEGVVALGQAANRDP RVFEH  
PDEFDPDRDARAH LAFGYGRHICPGQHLARLEMEVALSRLFRRLPGLRLT  
MEVSDLPLKEDSNIFGLYALPVAW

>CYP105CP2 (2524681509) *Salinispora arenicola* CNS243

MTKSMPVQDLPAFPIPREC PYRPSAQHVSLRSGGPMKVRLYNGRTAWLV  
TDSA HARAVLSDYRRVSIKPYHGNYPLLN EEF EKVVDSGYADV LFGVDPP  
EHTRQRQMIMPSFTLRRTAVLRPDIQRIVDDKLDMMRHGAPGDLVTEFA  
QPVPMSMVSFLLGV PWEDHEEFETPAHKLFVPELAE EATTEL GAYLERLI  
QKKEQPGGTGGTG LDDLDLRDHLRAGALS RDELVHIAMAMLVAGTD TTT  
NVISLGT LALLDNPDQWAALRDNPNDELIPGAVEEILRYTSLIEAFARVAV

SDIELNGAVIKEGEGILISSAGVNFDPALAPDPGRFDIRRP RPSPFSFSH  
GIHRCPGDNLARLELEIAFRSLVTRMPNLRTAKPIDQIPSNNDGTLQRL  
YELPVVW

>CYP105CN1 (2524681511) *Salinispora arenicola* CNS243

MAAPAPQATQSTTPHPPSYPLPRECPYRPSAGTARLRDAGPVSTVRLYDG  
RTAWLVGTAAEARALLADSRVSNRADFPNYPVMDERHLSMRATREMAREE  
EGGFAAALFGMDPPEHTRQRQQLLPRFTVRQVAARRPAIQRIVDEHLDAM  
EANGSPADLVSAFATPVPTMVVCTHLGVYPYQDRTRFEPVAVAGLFEPDRAD  
AAMAELTAYLHQLIETKQSEPGDGVIDHLIANHLRPGAIDRAELVAIASA  
ILVAGTVTTSSAIALGTLALLTAPGQYAALVDNPDLPVPGAVNEILRYLSL  
VEQLARVATEDIEIGGKLIRAGDGIIVSFAAGNLDPNVTHPDRLDVALP  
PTNHLAFSHGIIHCIGQNLALLELDIAFRALVSRFPTLRLAVPAEQLPY  
FAGDVPRLACLPTW

>CYP107FS2 (2524681512) *Salinispora arenicola* CNS243

MPVPQGEQNLTTVEFADPKALFATLGSRQPLHRISLPDGMFAVLVTGNRE  
ARQALSDPRLVRSITAAPELHKYHPLASDDYALSRHMLFADPPDHGRMR  
KLVSTAFTRRRVEQMRPRIQQITDDLIDVIAAKGEADLVETLALPLPIAV  
ISEMLGVFPADRSEFERHAEVLTGINASSGFDALIAAGRWFDEYLAELVQ  
QRRREPQDDLISGMLAAQDKGDRLTDVELRSNALLLSAGFETTUNLVAN  
GLLALLRHPEAAMALRSEPNLMTTAVDELLRYDSPVSCVTYHFAQEPVEI  
GGFEIRSGEHVIAAAAANHDPTVFADPSRLDLRREGSGQILSFSHGIHF  
CLGAPLARLEGEIAFGTVLRRLAGRLAVPTDSLWKASFVLHRLERLPV  
TFTPDRAPNPIDSVHTA

>CYP105CH1 (2524681907) *Salinispora arenicola* CNS243

VSSLPLPTYPKLRDPADPLLPAPAEYLAIQSEKPIAKVLLPSGRPTWLITG  
HALARQVLTEPCVSVDRRHNPFPYPVPNPDAVVAQVARWTYILLGDDPPL  
HTERRRLLI SEFTVRQAQAMRPRIQQLVDFHLEQLIAAGPGADF SKHFAM  
KVPSAVICEMLGVPFADHDYFQERTALQLRRDVPVAAQKQAIDELLAYFE  
QLIQEKSSHPGDDVLSRLIVSNRETEAFDHEALVALGLLLLLVGGHETTAN  
TLTLATATMLERPEIAEQLRTPSLMPSAVEEFLRYFSVAVAVSRIATAD  
LQVGGQLVRAGESMLLVNLTARDGTVFPEPHRLDIRRNARNHLAFSHGI  
HQCMGQNLARVEMQIALDTVLRRPLGLHLVTPFEELPFKYRHLVWGIEEL  
RVAW

>CYP107EU1 (2524682320) *Salinispora arenicola* CNS243

VTIGQTLPLVYSPEFTRDPYAI FARLREQAPVCRVTTHRGMSAWMVTRH  
ADV RALLADNRLAKDGNRIGELMPRHSTLTGAATGFPPGLTNNMVNSDPP  
DHTRLRHLVGREFTGHRVEGLRPRIEEIVDDL LDGVAACGDEADLAETLA  
RRLPIAVIGELLGVPEADRAEFFRWADTLYGGTASPEALGQAYNAIVDYL  
GRLCDAKRDVPADDLLTALVQVSADEDRLSREELVSMALLLVAGHETTS  
KQISNGVLALLLNPEQLKLLKAQPARTAGAVEELLRFEGPSLSASLRFTT  
EPVEVAGVVIPEGEFVLLSLASGNRDPEKFPDPDRLDITRSTQGNLAMGH  
GIHHCVGAAALARLELEIVLSRLVARFPQMQLAVEADDLEWL VNSFFRAPL  
HLPVSLRR

>CYP1198B1 (2524682528) *Salinispora arenicola* CNS243

MSGELTDQRTAPGAGGNPLRSLMDHGIRANPYPLFGELREAGPTAVEDGS  
VVLFGHEYEHCSQILRHRDMGSDTSEAPSIKGFVVD DAERAGSSIFFMDQP  
GHGRQRKLVS KSFTPRIVKSFGPQITHIVDGLFEDFRDRGELDVVTDLAY

PVSIIGIICDLFGIPDDERDMLKEWSDDLALSTELPTLGAAIGVLNVFTRD  
EINRFGSVAMAAHAYFADLIHRRRKPNPGDDLVSLLATESNGERLTRFEV  
TSVLATLFVAAHESTTNLISGGILALLRNQDQMAVLRENPGELITNVVDES  
LRYDPPVHLAARMARARTTIGGYDLDPGTIVVVLMAAGNRDPRAYENPDV  
FDVNRKIRNVSLAFGAGAHFCIGSGLAKLEAEIAISAFQRLKHPEVDES  
SLEYRRHIVVRGLEHMKVSFQP

>CYP163B1 (2518152948) *Salinispora tropica* CNB536

VTAADTGRVSGESQTPAHTVDLADPATFANHDLTGFWQQLRDEEPIHWN  
PPTAGRRGFVVVSRYADILDVYRDDVTFTSERGNVLVTLLAGGDAGAGRM  
LAVTDGPRHAELRKLLLRALGPRVLAPVCAAVRTNTRQMIREAVTKGEC  
FASDIASRIPMMTISNLLGVPDADRAFLLSLTKTALSADDESISETESAM  
ARNEILLYFQDLMEFRDHPGEDVVSMLVNSSIDGAPLSDDDIVLNCYSL  
IIGGDETSRLTMIDSVNTLAAHPQQWRRLKDGQCEIDKAVDEVLRWASPS  
MHFGRVAARDTILHGVRIRADDIVTLWHASGNRDERVFHRPEVFDLGRTP  
NRHLSFGHGPHYCIGSYLAKVEISELLIALRDLTSGFETTGEFQIRSNL  
LTGFATMPVRFPDRAGLARDALDG

>CYP107NH1 (2518153210) *Salinispora tropica* CNB536

MTEPVVSLMDPEFWNDPVSAYERLRGSGPLIRMGLPGVPPVWLVTSCHEV  
KSALSDPRFVVDAANVPGHHGPGIVDKMMAASGMPDEFRDYMTNMMFTDG  
KDHSRLRLRLVTPGFSARRIRAMRPRVNQIAEELVESLAEKGSSELIADFS  
APLTTTIVICELIGVDRADQAQMGAWMHDTTGERVVSGRAMVNYTRDLIE  
RRRAEPADDMI SAMIRSGDEAGDRLSDAEIIAMALLLINAGHHSTAQFIP  
NAVLVLLDHPEQLARLRAEPGQLPGAMDELMRLANPVPIATPRYATEDME  
FAGVAVRRGEALTGSLEAANFDPERFPAPRQLDTGRDLGRGDGHL SFGAG  
PHYCPGAALARLEGEIALDHL LRRDNLR LAVERDEVYVDVSLGLRMLS  
SLPVRL

>CYP247A8 (2518153216) *Salinispora tropica* CNB536

VRLNPEAGRPVALGSIDLFDPDLLASGDPHSVWDVMRSEAPLHRQVLPDG  
RVFWSVTRYEDVCRVLGDHRAFTSERGTVFTQLGADDIAAGKLLTSTDPP  
RHTEVRRRAIGGRLTARAVAHWEDLVRRVVRFLPALDGGCWDLAERAQH  
LPLIIAGSLLGIPDS DWEKLVQLTGMVTAPSDPMFGLDSEAATLAI AHHE  
IFDYLSDLVRRRRSVGTGGDSL LDHLMTVRAGAGPLPDEEVVYDSYSLIL  
GANATTPTHTLSGIVLT LAERPEQCDKVRADASLIPSMVEEGLRWTSACN  
FMRYATVDTRLTGGTVPAGEAVVAWIASANRDESQFADPHTFDVTRGENR  
HVAFGFGPHYCIGAPLARM TARIFFEELFRLFW SIEIDGEPQH LRSNFIA  
GMTHLPVVTRKRAQV

>CYP107Z27 (2518153226) *Salinispora tropica* CNB536

MSCTHPCHSLMDPTLIDDPAGGFSRIRDESPLAHAMVPGVDGPVWLVRH  
ESVRKVLGDRRFVNDPTNVPGSSTPDLWAHAALAQGV PHEYLEHVR SMLQ  
LDGEVHARLRRLVSRAFTMRRITALRPRMMQLTEELLDLLPAKAEDGVVD  
LVEHFNYVQPI SVICALVGVPAADRAAWIRWSRALTMESGTIGDAVTGM  
VDNIRALIEQRRAEAADLLTDLVRVRDADGDRLSEREMITMVITLV TAG  
HDSTGLLLSNGLAALLTHPDQLAKLRADPSLGPQAFDELMRWCSAIVAAR  
PRYATEDVELEDGLVRRGDVVI PVLVSANYDPEVFEDPHRLDISRVHEQR  
RFHHVGF GDGLHYCLGAALAKHEAAIAITALLERYPGLELAVPAQRLRRA  
RLPLTWRLDSL PVRLGIGG

>CYP211B1 (2518153605) *Salinispora tropica* CNB536

MDASEAVALLMSPLGRIDPYPTYERLRAHGPPVVQTAAGFFVVTGYTEADT  
VLRNARLAFEVMDDELRDDVFPHWQDSPAMKSIARSMIRANPPNHGRMR  
LAAGAFTPRRIAALREVVTQADELADEMIRAGRDGAPVDFMGSFAYPLP  
VAVICALLGVPAADWARFRGWASDLTAVLEPEITPQELTVADAGASELRD  
YFTELIAQRRRAPADDLTALVQTHDADGDRLSGEELLANLVLLLVAGFE  
TTTNLLGNGLVLLAHPDSATALRDQPELAPGYVDELLRYDSPVQLTTRT  
VRESVLLAGVELPAGSWVLVLLGAANRDPERFTDPTRFDPGRAQSPPLSF  
GAGAHYCLGAGLARLEAQVAFPLLLRRLPELALAGEPTRRNRLTLRGYET  
LPVTVSAIAADHGTPAGVARGTP

>CYP211C1 (2518154547) *Salinispora tropica* CNB536

VLDVEGLLTRLYSEQGRQDPYPVYADLHAQGAIAALAPRPEGQRVAAVAV  
GYDLVGAVLRDPEWSKQPPPGWMEQEILRTLQSSMMFINPPDHGRMRKVF  
AGTFTPRRLGTLEPVINRVADELDRMADAGPGEVDFVAEFAYPLPARVM  
AEFIGIPATELAWYRDRVDRIDAFLDVAGKTPERLAAANAAAAELRVFYA  
DLLARRRRTPGEDLISGLVEAVDAGGVQLTEDELINNLIIVLFNASFVTTV  
YMLSNGLPVLLHEHPEVAAALADDPELTAGAIDEILRLQTPVHLLARAAPR  
DTVLGGVPI PQGQNVLLLI AAAANRDP AHFPDPDRFDPRRPGPPSLAFGLG  
LHYCLGAAVSRLEGRALPRLLSRFPRLRIMEQPVYSGSLFLRGIDKLSV  
SPGGRMHP

>CYP125A15 (2518154680) *Salinispora tropica* CNB536

MTEPRIPVGFDFTDPAVLERRVPREEFAELRRTAPVWWNVQPRGSAGFDD  
DGYWVVTRYADVMAVSRSDTYSTRENTAIARFQPGTTRADLEMQRVIML  
NVDPPPEHTKLRAIVSRGFTPRAINALRGSLAERAERIVRDAAVRGTGDFV  
ADVACELPLQAI AELIGVPQHHRKVF DWSNQLIGYDDPAYGVDPLTAAA  
ELLAYAMEMANERQLNPSDDLVTKL VNAQIDGEHLTTDEF GFFVMLLAVA  
GNETTRNAITHGMLAFLEHPEQWELFKAERPRSAVEEII RWATPVNVFQR  
TALVDTTLGGQAI SAGQ RVALFYGSANFDES VFEEPERFDITRSPNPHLG  
FGGSGAHFCLGANLARLEIELIFHSIADHMPDIRKVAEPRRLRSGWINGI  
REMPVRYR

>CYP105AB2 (2518155126) *Salinispora tropica* CNB536

MTETASIATTRTASGQLTDAEFFVQRCFPFTAPTEYEQIREESSIAKVRL  
KNGGEAWWIAGHELGRSVLADRRFSSDRRRDNFPFVSTD PETRAQLQSQP  
TSMLGMDGAEHAQTTRALMGEFTVRRMAGLRPRIQQIVDQHIDEMLATPQ  
RSVDLVEALSLPVPSLVICELLGVYPYADHDFQGLTGPLL RHTTPPEVRL  
RIQEELNTYLGTLDHKLTDPTDDL SRQIAKHRDNGTFDRASMVSLAFL  
LLVAGHETTANMISLGVVGLLQHPDQLV I IKDDPKTPLAVEELLRYFTI  
ADSVTARVATEDVQLGDTTINAGDGVISGLAADRDPTVFAEPDRDLDER  
GARHHVAFGFQPHQCIGQTLARMELRIVFDTLFHRIPTLRLAAPLDDIPF  
KSDAFVYGIEELPVAV

>CYP107AX1 (2518155879) *Salinispora tropica* CNB536

MTSRPTAVFDQCLLRDPHSRYNALRDQAPVHHVLTDPDGAPAWLVTRYNDV  
RAAFTDPRLSVDKRFSGTDGEHGSSLPPELDAHLLNRDPPDHTRLRLRLAA  
AACTPRRVADLHPAVERIVSTLLDGLAGHDRAELIGSLASPLPLQVMHEL  
LGLPTQANIDFRTWTNTLLSADANQPAQSRAAMANMRRFLIEQLAHKRAQ  
PGDDLLTGLLAAREDDRLTDDELVAMVFLLMFAGYDNTAALIGTVTHAL  
LTNAELHEAVRGGSALDELIDEVLRWNPAFPLAVRRFAREPITIAGQTI  
PAGDRIWLCLASANRDPAQFTQPDELGIIGLRRSHLSFGHGIHYCLGAPL

ARLQTTIAVTSLNRFPEMRLAVPAHDIRWRESFRLRGLIALPVYL

>CYP125G1 (2518156369) *Salinispora tropica* CNB536

MSTEVVSTGNRADIOHPATYAAGVPYAEFARLRDKPVSWSVPEAALWRRS  
GEGRILSQPGFWAVTTHEGVVAASRQPEVFSSGRQGAFLADPRTTADLE  
QARQLLVNMDAPQHARVRKLVTAFTFPRAIRALGDSVTAHARNLVERAVR  
QEECDVVADLAAELPLLVLADLLGLPREDRHLLYQWSNNLVGFDDPEYGG  
GDVEAYRKTFEAFQYALSVAGERRRAPREDLMTLLATIEVDGRRLTDRE  
FCNFWLLLVVAGNETTRHLITGSLALVDNPMQRERLVADDTLPLSAVDE  
LLRWVSPIMQFRRTAIVDTELCGTPIAAGDKVVLWYTSANRDAAVFEAPD  
ELRLHRNPNPHLSFGMGPHFCLGAHLARLEARTMLRELAPHLSRFRLTGP  
VVRLESNFVNGVKSLLPGSFTGQ

>CYP1004A1 (2518156408) *Salinispora tropica* CNB536

MRANTARPHLSAAFLATKDDPYPAYAELRARGPLTRAELGQWLVTGHGAV  
SALLRDGRLESMPAEYTRTLTGDSPPGVDFLHRIVLTRTPPEHTRLRRI  
GRALGTPVVRRLHDRIAAATDALLEPALDRGRLDVVTELA VPLPVGVVCD  
LIGIPTGDRPAVLTRVTALAKVFDAAANLSPADLADINTALPWLHDYFGDL  
LAVRRAGSGGPTLTETMYEESASDRLAVADFVDNMLFLFHAGFETTMGLV  
SNGVAALLNNPEQLGRRLRADPALVPSAVEEFLRYDAPIQNVIRVARKPVE  
VAGQKIRAGRTVLLLLGAANRDEEVFADAERLDVGRDPNPHLGFGGGLHH  
CVGTALARLMMAVVVFERLVDRVTVLGPAAPAVRRRHASLSYDHLPLAVA  
AR

>CYP1004B1 (2518156412) *Salinispora tropica* CNB536

MTTSALAPRFDALDPNVVEDPYPEYARLRAAGPLCRLGPGSWGVTREFADV  
TNLQHDPRLGSEFPAGYHEISVGDGPASAFFQVRMLYRDPDPDHIRLRLRM  
SGAFTPAVVRRLRSHIEDLVDELLAPALAAGRMDLVPELANPLPVRVVC  
LMGIPPESTEDVRHHATNIGRAFTAVVPEQARTEADEAVSWLREHLGALL  
EQRRSHRGDDLLSRLLDAAESGDNLDAEIVDNTVFSFFAGFETTVHMIT  
TGTAALLAHPDQLARLRADPSLVTTAVDEFWRWDAPIQGTARYVREPIEI  
GGRTIRRGRLVLMIGSANHDERRFAQPDRLDVGRQDNPHVAFGGGAHL  
LGAFALARMEGAVVFDRLARLAVLEPDGPTVREPNTPFRAVASVPVRIGDR

>CYP1005A1 (2518156486) *Salinispora tropica* CNB536

VSAVLFRSWTKTAGTHWPAITRVADQQGTEHLVVTOHALVRQVLTDQLTY  
RPDNALDAVTPIPVAALRVLAGHRFRLPPTLANNGGVSHPAIRALVADAL  
HPAKVAAQRPWLTGLVAERVAAIRRTLDSGGSTDLHAELNADLPLLVLAR  
LVELPDAPVSAVKQFARAALFLWAPLDADRQLALADEVGRFHHQVLREFA  
DTGGGLAAALRATGHPPDVLVGALFFLLVAGQETTSQFLTLLHLRLADEP  
TVRAALRADSVSVADVVEEGLRLEPPIVTVRRVAAVDSTLGGSTVAAGTS  
VLLWLRAGRDPVVPAPDEFPRPGQRGSRRHLAFGAGAHRCCLGDQLARME  
AAVVVEQVTPLLDGVTVVRPPWYPDNLTFRMPDAFVVR

>CYP107AY1 (2518156619) *Salinispora tropica* CNB536

MRAELAPIPRSGARLGQEYDQLRNAGDVHQVLLPDSSLAWLVTNPKLVSR  
ALTDPRALNRRHSRGSWSGFALPPALDANLLNLDA PDHTRLRLRVGPAF  
SPQRVSALRPRIRRTAEHLLDTLVATSGPVDLVTGYCTPLSVQVIADLMG  
VPEAGRDLRTWTDMLTSYPPDRDAIRQAVVELHGYVVDLIDTKRQQPG  
DDLLSALVTIEQDGDRLTRDELTSALFLILFAGYENTANLIASVTLRLLD  
HGGLRGVQLPEAIEETLRLEPPAPAAVRRFPTEEMTIGGATIPAGDIVLL  
SIAAATRGTAGNAARLAFNGPHFCLGAALARVEAEALTVLARRLPDLA

LALPVAQVRWRPTFRTHGPAELLVTW

>CYP124M3 (2518157189) *Salinispora tropica* CNB536

MTVPVELDAVDLSDNDFWTKPLEYRHAVFNALRAQPGLPHFASPEFGSAP  
RGRGYYALTRMDDVLAVSRNPSTFISGKGNVAMEVPAEFLDQSLITMDNP  
RHARLRRIIVSRGFTTKAVTALMDNASQMAKQIVDEVVEQGECDVVDISA  
KLPLGIIICNMMGIPDSQQQFVFEQTNVMLGVQDPEYVGEQNDAMLAMSV  
SQELADLMHELATLRAKNPTDDLISKLLSAEVNGEALTPSELAHFFILLT  
GAGTETTRNAISWGIQLLTQSPEQREAWLSIDIDGVTPTAVEEIVRWSSPV  
ISQRRTVAEADAEPVKLAGQLLGPQDKVLMFYGAANRDPNYFAHPEGFDVR  
RSPNPHVGYGGPGPHFCLGAHLARLEISVMFRELLTRIPDIHATGEPARL  
KSPLINGIKRLPVAFTPGAR

>CYP208A22 (2518157290) *Salinispora tropica* CNB536

MTVIADRGGRIPPGPPVTASLRLLLLALGRDRLGMMTSAAAAYGDVARLPV  
GPKKLYFFNHPDHAKHVLADNHANYQKGIGLVHARRALGDGLLTSEGELW  
RKQRRVIQPAFQNRRLAQYAGAVGQEATRLVARLATRVDPFPVDVDEMT  
RLTLGVLGRTLDDAELTGFGHVGESFAAVQDQAMFELETINTVPTWIPLR  
RQRRFRRARQHLQEVVDVLAERGQAVEGRDDVLSRLILSTRAEADPQLG  
RERLRDELVTLLLAGHETTASTLGWSLHLLDQHPELRRERVRHEARTVLGD  
RVPAYEDLHQLRYTAMVVEEAIRLYPPVWILTRKARAEDEIGGYRVPAGA  
DILICPYTLHRHPRFWTEPERFDPERFDPSHTTDRPRYAYIPFGAGPRFC  
VGNNLGMLEATLVLAVLLRDLRLEGLPGRAVVPEPMLSRLVRGGGLPMTVR  
RVD

>CYP107AW1 (2518157640) *Salinispora tropica* CNB536

MESVTSTSAPPPVPYIADPYPALARIRANGPVSIHLSDEGIPMWVIARYR  
NVRAALADPRFGQDARRAQTLADNRVAGVTLGGDVIHMLNSDPPDHTRLR  
HLVQGAFTARRVAAMRPLVERITTSLLDGVGGRQTVDLVQDFAFPLPLMV  
ICELLGFPAEERDAYRSWSTAILTHNDDPAAFATALRDMTDYIEVQLRHR  
RARPGEDLLTELLAARDAGQLTDDEIVGMVFLLLIGGHETTVNLLGTATL  
ALVRNPDQHRWLLANPHALSEAIDEFLRYESPVAMATLRFTTAPVTVDDV  
VIPAGELVLVSLGGANRDPDRFPDADRLILDRRDTGHFAFGHGLHRCLGA  
FLGKLEGEVALGALLGRYPGLTLAAEVRQLRWRDTIMLRGLESPLVSLHG

>CYP107E3 (2518157822) *Salinispora tropica* CNB536

VTIDQEIRKYPFCESPGIGIDPTYGLLRSTEPLARVQLPYGEVSWLATRY  
EDVKTVLTDPRFSRAAAQKQDQPRTREEMTYEGIIIGLDPPDHTRLRKL  
KALTARRVNAIRADAQRIANEYVDEMIAGKSPGDLVELFALPYPVTVICE  
LLGVFPEDRAQFRIWTEGLTSTSEQLMVYAEQLFGYMGKLVQRRREESTD  
DLLGALVKARDEGDRLTEQELLSIAGVGLLLTGIVETVSTHINPFVYALLT  
HPELMAQLRADRSVLPAAVEELLRMIPLNPAAMFPYAVEDVTLSGITVR  
AGEPVLVSLPGANRDPEVFENPETFDFTREQNPVAFGHGPHHCLGAQLA  
RMELQVALHTVLDRFPDLSLADGDEGVSWKSGLLVRGSPSRLLLAW

>CYP283A2 (2518157964) *Salinispora tropica* CNB536

VQADKCPVTGATATTARGDSVEFDFFAAPQAYRRVAAEHARDGAFHSSRG  
DSFWVLSTYEGICAAFRDEDTFSVSRVSAADGAEDERWIPLTIQGRTHNE  
WRRRLAAWFTPQARADLTPAIRANARRRISAFVDRGEVSFSDEFARPYVL  
ENLMLAVGWPLADLDHLLAINVAMIRSREAPDPRQAFNAETAFFPALQEYV  
RRHVARRRAEPVEGDLTSATFDWEIDGTPVSDADRESLLTVLFLAGVDST  
VNHMANGIQHLAHHPGDRHRFLRDPEVRPAAVEEFLRVNSCMYPGRLATR  
EGAGGVASQGDVTLLPLALANYDPAVFPEPERVDFDREQNPVAFGTGHH  
QCLGAAYARAQILTAWEEWHELIPDYRLPDPTVEPPFLRVNYDLRIVW

>CYP105AB37 (2516082314) *Salinispora pacifica* CNT084

MTETASTTTTPGISSATTPRISSTTTSGPASGEVTDAEFFVKRGCPFSTPT  
EYEQIREHSPLAKVRLTTGREAWWIAGHELGRAVLADRRFSSDRRRDNFP  
FVSTDPETKKQLQDQPTSMIGMDGAEHAQARRALMGFTVRRMAGLRPRI  
QQIVDQHIDEMLSSDQRTADLVEALSLPVPSLVICELLGVYPYADHDFQ  
RSGPLIRHTTSTEVRLRIQKELNTYLGALIDRKVTDPTDDLRSRQIAKHH  
AAGIFDRSTSLVSMALLIAGHETTANMISLGIVGLLQHPDQLAMIKEDP  
EKTPPAVEELLRYFTIADTVTARVATEDVQLGDTTINAGDGVVISGLAAD  
HDPTVFTDPDRLDLERGARRHHVAFGFGPHQCIGQTLARMELQIVFDTLFR  
RIPTLRLAAPLDDIPFKSDAFVYGAERLPVAW

>CYP211B11 (2516083101) *Salinispora pacifica* CNT084

MDASEAVALLISPPGRLDPYPTYERLRAHGPPVSTAPGFFVVTGYTEADT  
LLRNPRFEVMEDEERDGVFPQWQDSPAMISISRSMIRANPPDHSRMRRLA  
AGVFTPRRVAALREVVAQAADGLVDEMIRAGRGAADVDFMGSFAYPLPVT  
VICALLGVPTADWARFRHWASDLTGVLEPEITPQELAIADAGASELRDYF  
TELIAQRRRAPADDLTALVQAHDADGDRLSGEELLANLVLLLVAGFETT  
TNLLGNGLVLLTHPDSATALRGQPELAPGYVEEFLRYDSPVQLTSRMVR  
ESVSLAGVELPAGSWLLVLLGAANRDPARFTDPARFDPRRSQSPPLSFGA  
GAHYCLGAGLARLEAQVAFPLLLRRLPELALAGEPTRRHRLTLRGYETLP  
VTVGAVPADPGTPAGVALGTP

>CYP107AW10 (2516083810) *Salinispora pacifica* CNT084

VETVTGTSTPPMPYIADPYPTLARIRANGPVSIHLSDEGIPMWVIARYR  
DVRTALADPRFGQDARRAQALADNRVAGVTLGGDIVHMLNSDPPDHTRLR  
RHVQGAFTARRVAAMRPLVERITTSLLDGLTGRTVDLVQDFAFPLPLMV  
ICELLGFPAEERNAYRSWSTTILTHDDDPAAFATALREMTDYIAVQLRIR  
QTRPGDDILTELLAARDAGQLTDEEIIIGMVFLLLIGGHETTVNLLGTAIL  
ALMRNPDQHRWLLANQHALPKAIDEFLRYESPVAMATLRFTTTPVTIDDV  
VIPAGELVLVSLGGANRDPDRFPEADRLILDRRDTGHFAFGHGLHRCLGA  
FLGKLEGEVALGALLRRHPRLALAAEVRQLRWRDTIMLRGLESPLVSLHG

>CYP125A65 (2516083969) *Salinispora pacifica* CNT084

MTEPRI PVGFDFTDPAVLERRVPREEFAELRRTAPVWWNVQPRGSAGFDD  
DGYWVVTRYADVMAVS RDSETYSTRENTAIARFQPGTTQADREMQRVIMI  
NVDPP EHTKLRAIVSRGFTPRAINALRGSLAERA EHVIRDAAVRGTGDFV  
TDVACELPLQAI AELIGVPQHRRKVF DWSNQLIGYDDPAYGVDPMAAAA  
ELLAYAMEMANERQRNPSDDLVT KL VNAQIDG EHLTTDEF GFFVMLLAVA  
GNETTRNAITHGMLAFLEHPDQWELFKAERPRSAVEEIIIRWATPVNVFQR  
TALVDTTLGGQAITAGQRVALFYGSANFDES VFEEPERFDITRSPNPHLG  
FGGSGVHFCLGANLARLEIELIFNSIADHMPDIRKVADPQRLRSGWINGI  
REMPVRYR

>CYP208A30 (2516084971) *Salinispora pacifica* CNT084

MTVTAAGRTFSGPTGSALLRSLWQLGRDRLGLMTSAARYGDAVRLGVGSR  
SLYFFNHPDHAKHVLADNSGNYTKGIGLVHARRALGDGLLTSEGE LWREQ  
RRVMQPVFQAKRIAGQAHAVAE EADRLRLARRGGGPVNL TDEFTALT  
LGVLGRTLLDAKLDAFASVGAAFEEMQNQAMFEMASMSLVPMWVPLPQQL  
RFRRARRELERIVGRLVADRTARGEVTGADDALSRLIAATQDEPDPGFAR  
RRMRDELVTLLLAGHETTASTLSWTFHLVNQHPWVRGRRLRKEAIEVLGDR



LPEYADLARLTYTKMVVSEAMRLYPPVWMLSRRLARDADVVDGYVPV  
PARADVLICPYTLHRHPAFWPEPERFDPERFDPGAVTDRPRYAYV  
PFGAGPRFCIGNHLGLMEAVFVAMVSREFELVAPVGQPVVAEP  
MLSLRIRGGLSMTVEPVS

>CYP244A12 (2516085069) *Salinispora pacifica* CNT084

MQDTAHVNLA EAPTVTMPIELRPTDCLPELLAAARVAPIV  
RTPYLDQHAWVVC DRELVKQALHTPKLGKDVALAPDWMRQ  
PGQMVTAMPPPEYARMMVMSDGEHHARIRRIHAPVLS  
PRNTGRWSERVAALVAGFLDNLDSADGTEVNLI TDYTQ  
KIPLAFTAEMLG LPPGVERRLHDITEVMLYSADYALRQ  
HAVGELFEAVQE WVRDPAELRDG VITGLLASTDGPDA  
RVTEGEAIVWTL SLIINGYE TTGSLISAALYEALRR  
PAPERPH TDEAVAAWIEETLRVQPPVPHTTWRFAL  
ADLDLGGYLIPKGAPVQISLAAANLDPDEAADSFDA  
QRRGRGHLSFGLGAHYCIGAPLARVQTKIALRGFL  
RRFPQARLSADTAPRWESEWMIRRM SVLPVLLA

>CYP107AY8 (2516085091) *Salinispora pacifica* CNT084

MRAELAPIPRSGARLGPEYDQLRKTDGVHQVLLPDT  
SMAWLVTSPELVSRALADPRLALNRKHSRGGWSGFAL  
PPALDANLLNLDAPDHTRLRRLVGPAFSPQ RVAAL  
RPRIQRS AEELAE TVVATGSPVDLVT SYCTPLSVQ  
VIADLLGVPEAGRTDLRAWTDMLTSYPPDRDAIRQ  
AVVELHGYVVNLIEAKRQRP GDDL SALVATEQEG  
DRLTRDELTS LAFLILFAGYENTANLIAS TVLRLL  
GHGSLRGVRVPEAIEETLRLEPPAPAAIRRFPT  
EEMTIGGATIPAGDTVLLSIAAATRGADGNPAR  
LAFNGPHFCLGAALARVEAEEAITVLARRLPGLA  
LAVPGASVRWRPTFRTHGPAELLVAV

>CYP1005A6 (2516085889) *Salinispora pacifica* CNT084

VSAVLFRSWTKTAGTHWPAVTRVADQQGTEHLVV  
TEHALVRQVLT DQVTV RPDNALDAVTPIPVAAL  
RVLAGHRFRLPPTLANNGGTSHPAIRALVADAL  
HPAKVAAQR PWLTELVAERIAAIRATLDSGGSAD  
LHAELSADLPLLVLARLVELPDAPVSAVKQFA  
RAALELFWAPLDADRQLALADEVGRFHQVLR  
EFA DTGGGLAAALRATGHPPDVLVGALFFLLV  
AGQETTSQFLTLLHRLAGEPTVRAALRDGSV  
SVPNVVEEGLRLEPPIV TWRRVA AVDSTLGGT  
AVPAGTSVLLWLARAGRDPAIVPAPDEF R  
PGQRGSRRHLAFGAGAHRC LGDQLARMEAAV  
VVERVTPLLDGVTVVRAPWYPDNLTFRMPDA  
FVIRR

>CYP107AX6 (2516086208) *Salinispora pacifica* CNT084

MTSPAPVFDQ LLLCDPHRRYNALRDEAPVHHIR  
TPDGAPAWLVTRYHDVRAAFTDPRLSVDKRLS  
STDGEHGSSLPPELDAHLLNRDPPDHTRLRRL  
LAA AAFTPRRIADLRPAVERIVSTLLDGLAGH  
DQAELIGSLASPLPLQVMQEL LGLPTQTSV  
DFRTWTNTLLSADANQPAQSR SAMANMRRFL  
VEQLAHKRAQ PGDDL TGLLAARE DGDWLT  
DDELVAMLFLLMFAGYDNTAALIGNVAHAL  
LTNAELPAAVHTGSLAVDELVDGVLRWNP  
SFPLAVRRFA REPIT IAGQAI PAGDRIWLC  
LASANRDP AQFTEPDTLGTTGMRRPHLSF  
GHGIHYCLGAPLARLQTTVAVTSLLD R  
FPGIRLAVPAQDIRWRESFRLRGLVALPVFL

>CYP107LA2 (2516086422) *Salinispora pacifica* CNT084

MECPVTARSSRFYPFSDRADLILDPTYGELRSKEP  
VARVRMPYGGGDAWL VTRHADAKKALSDPRLS  
IAAGAGRDVPRASPRIQEAEGLMGMPPEAHARL

RRLVATAFTPRRVARDIAPRVAEIIADRLVNDVIETGPPADLVRQIALPVPI  
TIIICELMGVPAEDQHVFRVFS DALMSSTRYTDDEVDQAVQEFTAYLGGLL  
TQRRAHRTDDLI GALIEARDDGERLSEEEELIMLTGGLLVGGHETTASQIA  
SHLLVLLRDRARYETLSARPELIPTAVEELLRVAPMWVTVGPTRIATEDL  
ELNGVTIRAGDAVIFSLSSANLDEDAFPDATDVVLDREPNPHIAFGHGPH  
FCIGANLARLEIQSTIGALVRRLPGLRLAVEENDLEWRRGMIVRSLAALP  
VTW

>CYP113B7 (2516086423) *Salinispora pacifica* CNT084

MTQTDNAPMPPLDL PKGADAQGLLDWFAYMREHSPVSWDETRQAWHVFN  
QDYLTVTTNPLIFSSDFSPVFPVPPELALLMGPGTIGGIDPPRHGPMRKL  
VSQAFTPRRIAQMEARIETITADIFEQVRGQERIDIAADLAYPLPVTVIA  
DMLGIPNEDHEKFREWVDIILSNEGLEYPNLPDDFTETVGPAAIAEWSEFL  
YAQIAEKRARPDQDLM SGLLAVEVEGRRLTDEEVNIVALLLTAGHISSA  
TLLSNLFLVLEEHP EALAAVRADRS LVPGVVEETLRWRS PFNCIFRLLAQ  
DTEIFGQPMRKGQMVIAWIASANRDTEVFAEPDFTDIRRKS NKHLAFGYG  
IHHCLGAFLARQEAKVFLNQVLDEFSEFTIDHDGVEFYDPDQLTARRLPV  
QVVR

>CYP163B20 (2516086942) *Salinispora pacifica* CNT084

VTATDAKDVGVGSRNVASTIDLADPATFAGHDLTNFWQRLRDEEPIYWN  
PPTSGRRGFVWLSRHADILEVYRDDMTFTSERGNVLVTLLAGGDAGAGRM  
LAVTDGPRHTELKLLLRALGPRVLGPVCRAVRANTRQMIGAAAANGCED  
FATDIASRI PMITISNLLGVPEADRASLLKMTKTALSADDESISD TDSEM  
ARNEILLYFQDFVEFRRKNPGEDVVSMLVNSSIDGVPLSDDDIVLNCYSL  
IIGGDETSRLTMIDSINTLAANPGQWRRLKEGRCDIDKAVDEVLRWASPS  
MHFGRTAVRETVIHGERIQVDDIVTLWGASGNRDERAFKQPEVFDLGRVP  
NRHLSFGHGPHYCIGSYLAKVEISELLIALRDLILGFEVIGEPQIRIRSNL  
LSGFSTMPVRFDADRTGLASEAREG

>CYP107E37 (2516087120) *Salinispora pacifica* CNT084

VTIDQEIRKYPFRES PGIGIDPTYELLRRTEPLARVQLPYGEVSWLVTRY  
EDVKTVLTDPRFSRAAAQ GKDQPRTRAEMTYEGII GLDPPDHTRLRRLAG  
KALTARRVNAIRADAQRIANEYVDEMI AKGSPGDLVELFALPYPVTVICE  
LLGVPFEDRAQFRIWTEGLTSTSEQLMVYAEQLFGYMGKLVAQRRAEPTD  
DLLGALVKARDEGDRLTEQELLSIAGVGLLLTG VETVSTHIPNFVYALLT  
HPELMAQLRADRS LVPAAVEELLRMIPLNPAAMFP RYAVEDVTLSGITVR  
AGQPVLVSLPGANRDPEVFENPETFDFTRDQNPHVAFGHGPHHCLGAQLA  
RMELQVALHTVLDRFPDLRLADGDEGVSWKSGLLVRGPSRLLVGW

>CYP208A12 (2515708401) *Salinispora arenicola* CNT857

MTLDTITPRVPLGPRTAALRMLLV MKRDRLGMLTSAAARYGDASRLPVG  
HKALWFFNHPRYAKHV LADNSANYHKGIGLVHARRALGDGLLTSEGD LWR  
KQRKVIQPAFQSRRIAQQAGMIAEEAFALVERLRARAGAGPVELTAE LTG  
LTLGVLGRSLLDADLAGFDSIGDSFATVQDQAMFELET LNAVPMWIPLPR  
QIRFRARRRKLQAVVDTLVDGRAGNLADRVDVLSRLILSARGEADPRVGR  
ERLRDELVTLLL AGHETTASTLGWTL SLIDRHGPVWERLHAEAVEVLGDR  
LPEYDDLRLRLRYTVMVVEEAMRLFPPVWLLPRRALAPDTIGEYRV PANAD  
VVISPYTLHRHPEFWPNPERFDPERFAPGQAADRPRYAYLPFGAGPRFCV  
GNNLGMMEAVFVIALLCRHLRLTGVP GHRLVPEPMLSLRIRGGLPLVVRP  
VS

>CYP105CP2 (2515709699) *Salinispora arenicola* CNT857

MTKSMPVQDLPAFPIPRECPYRPSAQHVSLRSGGPMKVRLYNGRTAWLV  
TDSAHAARAVLSYRRVSIKPYHGNYPLLNEEFEKVVDSDGYADVLFGVDP  
EHTRQRQMIMPSFTLRRRTAVLRPDIQRIVDDKLDEMRRHGAPGDLVTEFA  
QPVPSPMVISFLLGVPWEDHEEFETPAHKLFVPELAEAEATTELGAYLERLI  
QKKEQPGGTPGGTGLLDDLIRDHLRAGALSDELVHIAMAMLVAGTDTT  
NVISLGLTALLDNPQWAALRDNDELIPGAVEEILRYTSLIEAFARVAV  
SDIELNGAVIKEGEGILISSAGVNFDPALAPDPGRFDIRRPPRPSFSFSH  
GIHRCPGDNLARLELEIAFRSLVTRMPNLRATAKPIDQIPSNNDGTLQRL  
YELPVVW

>CYP105CN1 (2515709701) *Salinispora arenicola* CNT857

MAAPAPQATPSTTPHPPSYPLPRECPYRPSAGTAHLRDAGPVSTVRLYDG  
RTAWLVGTAAEARALLADSRVSNRADFPNYPVMDEHLSMRATREMAREE  
EGGFAAALFGMDPPEHTRQRQLLLPRFTVRQVAARRPAIQRIVDEHLDAM  
EANGSPADLVSAFATPVPTMVVCTHLGVYPYQDRTRFEPVAGLFEPRAD  
AAMAELTAYLHQLIETKQSEPGDGVIDHLIANHLRPGAIDRAELVAIASA  
ILVAGTVTTSSAIALGTLALLTAPGQYTALVDNPDLPVGAVNEILRYLSL  
VEQLARVATEDIEIGGKLIRAGDGIIVSFAAGNLDPNVTTHPDRLDVALP  
PTNHLAFSHGIIHCIGQNLALLELDIAFRALVSRFPTLRLAVPAEQLPY  
FAGDVPRLACLPTW

>CYP107FS2 (2515709702) *Salinispora arenicola* CNT857

MPVPQGEQNLTTTEVFADPKALFATLGSRQPLHRISLPDGMFAVLVTGNRE  
ARQALSDPRLVRSITAAAPELHKYHPLASDDYALSRHMLFADPPDHGRMR  
KLVSTAFTRRRVEQMRPRIQQITDDLIDVIAAKGEADLVETLALPLPIAV  
ISEMLGVFPADRSEFERHAEVLGTGINASSGFDIAAAGRWFDEYLAGLVQ  
QRRREPQDDLISGMLAAQDKGDRDLDVELRSNALLLSAGFETTVNLIAN  
GLLALLRHPEAMAALRSEPNLMTTAVDELLRYDSPVSCVTYHFAQEPVEI  
GGFEIRSGEHVIAAAAANHDPTVFAAPSRLDLRREGSGQILSFSGIHF  
CLGAPLARLEGEIAFGTVLRRLAGRLAVPTDSLWVKASFVLHRLERLPV  
TFTPDRDPNPIDSVHTV

>CYP125G6 (2515709739) *Salinispora arenicola* CNT857

VPTLLNEHVSYDGAIAIVDSGATSWIRLAERVNRVHLLRAHGLDTGD  
RLACVTGNRRETFVLLAALHTGVTVPVNVHLLTVTEIGHILSDSGSRVV  
ITEELHVKAFAAADGTAGPVAGLVLDREVEGFAAVEPLLAASPAEPE  
GQVCGATMLYTSGTTGRPKGVVNNLFVTGAPYARVGRLCDYARSVLGVPR  
RERMLLDGPWYHSSQLFFALLSLLQGSRLVIRPYFDPAATLKTIDDHRI  
VTHLVPTQLVRLLRVDALTRQMFSGASLRRVWHGGGPCPPEVKRSMIDWW  
GPVLVEYYGATEGGVVTLIDSAEWLARPGSVGRAVPPSEVVVVDDGGQPV  
AAGQTGQVFFRRRTGNQFHYHNAPEKTQAAYLAPDTFTTYGEVGHVDE  
LFLTGRAQDMIVSGGVNVYPAEVEAALLRHPVVRDAAVIGVADDEFGERV  
VGIVVPETAVDPDFFATHLDAHCRVSLAGFKVPRTYRVVESLPRDETGKL  
RKDALRSKFGWLSGAAMTVPRPATGQPTAHRPDIAHPTTYVSGVPHDEFA  
RRRRDEPVGWAEPLVTRHTAAGRTATRGSGFWAVTRYEDVVAASRRVTD  
FSSAAKGAFLLTPRTPADLQQAQQLLVNMDDPHHARLRKLVTSVFTPRAV  
RGLLASIDAHAAALVAKVVAAGEFDVVTDLAAELPLLVLADLLGVPKQDR  
ALLYGWSNHLVGFDPDFGGGDIDAYRTAMAEAFQYALNLGVERRARPTD  
DLVSLLANAEVDGTRLTDREFCNFWLLLVVAGNETTRHLVAGTMQALTEH  
PGEARLVEGRVPMESAVEELLRWVTPIMQFRRTATRDTEIGGQAVTAGE  
KVVLYYTSANRDATVFAEPDRLDLGRTPNRQLSFGIGPHYCLGAHLARAE  
LTALLRVMSPHLGSLQLTGFPVSRLASNFVNGVKAMPAVIGSR

>CYP154M15 (2515709764) *Salinispora arenicola* CNT857

MNDKCPFAALDVTGQDLHGEEARLREQGPAVLVELPGGVKAWSINRYEVI  
RELLMDRRVTKNARKHWPFAFIKGEIPPDWEMISWVAMDNMVTAYGKDHVR  
LRKLVGRAFTQRRADALRPQVVALSTKLLDDL GATPPGEVVDLRERFAYP  
LPAMLVASLIGMSEAAALACSKVIDMMVHTNVSPEEAQAVLRGWRAAMAD  
LIESKRRTPGEDITTDLIAAREEDGSRLSEAEADTIFAILGAGSETTIN  
FFDNAITALLSRPGQLQLLRTGAVTWDDVIDEVLRVESPLAHLPLRYAVE  
DIELDGVTIPQGDPILVNYAAAGRDPALHGGTADEFDLARGDKTHLSFGY  
GPHYCLGAGIARMVATIGLSMLFERFPDL SLAVPATELKRLPTFIMNGHQ  
TLPVRLTTHAR

>CYP107FJ2 (2515709783) *Salinispora arenicola* CNT857

MSETLSTSVLLADAAEQRAWRAKLRGAGPVHRITTSGETGWLIVGHEEA  
RNALVDLRLQGRATATVGHGRMPEDLERALNSHMLNVGPPDHTRLRRLVS  
AAFTRRRIEQMRPRIQELTDELLDGLAGADEADLVAGLALPLPMRVLDL  
FGIPAEDCADFNVTWKVLTSA GAVDLDRLTAAAGEMVAYLRGLLDRKRQV  
PESDLLSALVAVRDGADRLSDELTS MVYLLLTAGYETTVNLIGNGLLNL  
LANPEQLVAFKADPDLLPQVVVEEAMRFDSPVQIAVRHSTEPVEIAGQAIP  
SGALILVSL LWANRDPDRFTEPEAFRVDRQDN PQLGFGYGFHHCIGAPLA  
RMEGTIAIGTVIRRFPALRLAHPAGSLTWRASMVMHGLTALPVHLR

>CYP154M20 (2515709790) *Salinispora arenicola* CNT857

MERCPYVLDRAGRDLHGEEAKALRARGPVT LVELHG GYTAVSVTSYEIAKQ  
LLVDPRI SKNTKETWPEFREGKVPQDWELYT WVAMDNMQTRDGEEHDRLR  
KLVAQAF TTRQVAKVRPMIEDIVDRLLDDLEKVPAGEVVDIKGRYFYPLS  
TILVCDLLGIPEADRAEALHGT VVNARTTNSAESEANLHQWQSALSKLV  
ETKRREPGNDITTLIIKAREDEQA PLTDDEVIGSLHLLIGGGTETTSNVL  
CNTLIDL LTHPDQMAMIRSGAVGWEAAWEEVRKDGAVGSMPPFRCANADI  
EIGGV TIAKGDVLV LINYAAAGRDPERYGD TTAEFDITRADKTNLSFGYGR  
HRCLGPALATMEAMISLPALFERFPDLVLAVPRDELKPQGTFFVNGYAEV  
PMLLRS

>CYP105W2 (2515709819) *Salinispora arenicola* CNT857

MTGYQDRPTGDQPGAPVPSGSTDPGIGAFPLPRRCPFSPPAEYARLRAEH  
PVVRLPMLGGDTAWVVS RHADVRQVLS DPRMSADRRRP GF PKFAPTTEGQ  
RQASFANFRPPLNWLDPPEHAICRRQIVDEF SVRRVRQSRALVERVVDTH  
LDALTA AAPGADLVSTFAYPVPSQV ICEVLGV PYGEHEFFERRSTLMFRR  
STPADERARCAREIRDFLDVVVDKEHRPGDDVLSRLLYRQRRAGGVDHE  
AVVSMAFVLLVAGHVTTSNMLALSVLALLTHPARLARLRAE PERFPAAVE  
ELLRYFTVVEAATARTATAEVTIGGV TIAAGEGVVALGQAANRDP RVFEH  
PDEFDPDRDARAH LAFGHGRHICPGQHLARLEMEVALSRLFRRLPGLRLT  
MEVSDLPLKEDSNIFGLYALPVAW

>CYP154M13 (2515709832) *Salinispora arenicola* CNT857

MSTGRPVVLDPTGRDIHG EADHLRALGPATLVELPGGVLAWSINSYEVGK  
ALLSAPNVSKSARRHWP AFYNGEIPPDWEMISWVAMDNISTTFGGDHRR L  
RRLTAKAFGSRRAEQVRPMATHMVNTLLDRMADAADAGEVVDLKAAFAYP  
LPGMLVAELIGMSEEARVAAAKVIDMMTATNITPEQAQGVLLGWRDAITD  
LIAALKRAQPGDDITSDLIAARDEDGSLLTEQELVD TIFAILGAGSETTIN  
FFDNAITQLLTHPEQLELVKSGQVSWDDVIEEVLRL ESPLASLPMRF AVE  
DIQLDGVTIHRGDPILIN YAAALGRDPALHGESAGVFDVTRQHKEHLSFGH

GAHYCLGAGIARMVAKTGLSALFERFPRMTLAVSAKDLVPYPTFIMNGNR  
QLPVHLSGALTWREGEQSALGRA

>CYP154M21 (2515709833) *Salinispora arenicola* CNT857

MEKCPYVLDRAGSDIHKEASNLARGPVTLVELHGGYTAWSVTSYEVAKQ  
LLMDPRISKNTKAHWPEFRDGNVPQDWELYTWVAMDNMQTRDGKEHDRLR  
KLVAPAFTRQAVKSRPIIEEIVNRLDDLETAPRGQAVDIKARYFYPLS  
TILVCDLLGIAEEDRDVILHGNVVNSKTTNTAESEANLHQWQTALGRLV  
ETKRDRDPGDDLTTVIIKAGEDEQTPLTDDEVIGSLHLLIGGGTETTANVL  
CHTVVDMLTHTPDQLAMVRSAGVSWESAWEEEVRKDGAVGSMFRCATDDV  
EIGGVTTIAKGDLVLINIAAAGRDPERYGDAAAEFDITRADKANLSFGYGR  
HRCLGPALATMEAMVALPALFDRFPNLALAVPPNELKPQGTFFNGYAEV  
PLLLRS

>CYP211B2 (2515709924) *Salinispora arenicola* CNT857

MDVSEAI AVLISPSGR LDPYPTYEQ LRAHG PVSQTTAGLFVVVTGYAEADM  
VLRDPRFVV LDDDLRDDVFPHWQDSPAIKSIARSMRLTNPPDHSRIRRLA  
AGAFTPRRVAAMREVVTAQADELVDEMIQAGRDGARVDFMDMFAYPLPVA  
VICALLGVPAADRSRFRRWAGDLTGILEPEITPEELAGADAGADELRDYF  
TGLIEQRRRAPADDLTALVQAHDADGDRLSGEELLANLVLLVAGFETT  
TNLLGNGLV LLLTRPEAAAAALRDEPDLAPGYVDELLRYDSPVQLTTRTVR  
ESVSFAGTELPAGSWLLVLLGAANRDP RRFDPARFDPGRAQSQPLSFGA  
GPHYCLGAGLARLEAQVAFPLLLRRLPELALAGRPSRRTRLTLRGYETLP  
ITVGAVTADRGT PAGVAPGTP

>CYP125A41 (2515710232) *Salinispora arenicola* CNT857

MTEPRIPAGFDFTDPEVLAHRVPREEFAELRR TAPVWWNAQPRGSAGFDD  
DGYWVVTRYADVMTVSRSDTYSTRENTAIARLRPDTTREDIEMQRVIML  
NVDPP EHTKLRAIVSRGFTPRAINALRGSLAERA EHIVRDAAVRGVGD FV  
TDVACELPLQAI AELIGVPQHRRKVFDWSNQLIGYDDPAYGTDPLTASA  
ELLAYAMEMA EERQRSPSDDLVT KL VNAQIDG EHLTTDEF GFFVMLLAVA  
GNETTRNAITHGMVAFLDNPEQWELFKAERP KSAVEEII RWATPVNVFQR  
TALVDTVLGGQAI SAGQRVALFYGSANFDEAVFEDPERFDITRSPNPHLG  
FGGSGAHFCLGANLARLEIELIFNSIADHLPDIRKVAAPQRLRSGWINGI  
RQMPVRYR

>CYP211C1 (2515710381) *Salinispora arenicola* CNT857

VVDVEELLTRLYSAQGRQDPFPVYADLHAQGSIAALPPEPERRRVA AVAV  
GYDLVGAVLRDPEWSKAPPPGWTEQEILRTLQTSMMFINPPDHGRMRHVF  
AGTFTPRRLGALEPVVNRVADELDRMADAGAGGLDFVAEFAYPLPARVM  
AEFIGIPETELDWYRERVDVIDAFLDVAGKTPQRLAAANAAGAE LRAFYG  
ELLARRRRTPGEDLISGLVEAVDAGGVELTEDELVS NLIVLFNASFVTTV  
YMLSNGLPVLLAHPEVAAALATDPVLTAGAVDEILRLQAPVHLLARAAPR  
DTV LGGVPI PQGQNV LLLIAAANRDP AHFPDPDRFDPWRSGPPSLAFGLG  
LHYCLGAAVSRLEGR LALPRLLSRFPRLRIMEQPVYSGSLFLRGIDKLSV  
SPGEGSTRE

>CYP1005A1 (2515710578) *Salinispora arenicola* CNT857

VSAVLFRSWTKTAGTRWPDVTRVADQSGTEHLVVTRHALVRQVLTDQATY  
RPDNAL EAVTPI PVAALRVLAGHRFRLPPTLANNGGVSHPAIRALVADAL  
HPTKVAAQR PWL TGLVADRVASIRTTLD SGGPVDLYADLTADLPLLVLAR

LVELPDAPVNAVVKQFARAALFELFWAPLDADRQLALADEVGRFHQVLRFA  
DTGGGLAAALRATGHSPDVLVGALFFLLVAGQETTSQFLTLLHRLSGEP  
TIRAALRAGSISVADVVEEGLRLEPPIVWRRVAVDSTLGGTTVAAGTS  
VLLWLARAGRDPVVAAPDEFRRPGQRGSRRHLAFGAGAHRCCLGDQLARME  
AAVVVEQATPLLDGVTIVRPPWYPDNLTFRMPDAFVVR

>CYP105BL2 (2515710855) *Salinispora arenicola* CNT857

MSSHSAAPDPETATPLHTLAPELAFFQFERSAPFDPPQAYTELSGRCPV  
APVSMADGKPSWLITSFEGVRTTSLDPRFSSDMSPGFPNRTGKPVDDL  
KDTLGAMDGERHRYRRLTGELTVRRAKAMRPVITQITDEALDQLAAAG  
PGADLVKHVAFVVPSPRVACHLVGIPLSYELFTGMAATLMDSTSSDDQFA  
ALQNMVSYFDTLVTDREHHRDDLLGHMVRRYLATGELTRDMLIRLAWTT  
MAAGQETTAHMIGLGVAALLRHPDQLELLRREPHLLPGAVDELMRYLPLI  
QFGIPRVAMDDVEVDGQTVTAGEGVVALPPLANRDPVFERPDELDVRRN  
ARQHLTFGYGPHQCPAHALARLELEVYGRLLERFPTLRLADSDADLVQ  
DKDIMYRVSELAVTW

>CYP105CH1 (2515710928) *Salinispora arenicola* CNT857

VSSLPLPTYPKLRDPADPLPPAEYLAIQSEKPIAKVLLPSGRPTWLITG  
HALARQVLTEPCVSVDRRHFNFPYPVPNPDAVVAQVARWTYILLGDDPPL  
HTERRLLISEFTVRQAQAMRPRIQQLVDFHLEQLIAAGPGADFSKHFAM  
KVPSAVICEMLGVPFADHDYFQERTALQLRRDVPVAAQKQAIDELLAYFE  
QLIQEKSSHPGDDVLSRLIVSNRETEAFDHEALVALGLLLLVGGHETTAN  
TLTLATATMLERPEIAEQLRTDPSLMPSAVEEFLRYFSVAVAVSRIATAD  
LQVGGQLVRAGESMLLVLNTIARDGTVFPEPHRLDIRRNARNHLAFSHGI  
HQCMGQNLARVEMQIALDTVLRRPLPGLHLVAPFEELPFKYRHLVWGIEEL  
RVAW

>CYP107Q4 (2515710948) *Salinispora arenicola* CNT857

MTTTAETS AETIDLFSPEVVADPFGWYARLREETGPTTGTLNIGTMMGGP  
EMWLVTTRYEDVRQVLTDPRFLTNPADSPLEDIRAGVFKRLDFPPDLIPW  
MANLLNVSDGEDHTRLRKLVSYALTAHRIGKLRPRVEKITADLLDKLAED  
GKDGSPVDLVEEYCYPLPVTVICELVGIDEPDRPHWRWAGDSMATMNGER  
IPTTLVKCIELARELIANRAEPQDDLVTALVQAQAEQDNRVSDDEIIGI  
LFSLVTAGHQTTTYLIGNSVILLLENPDQLARLKDNPMSMPQAVRELQRL  
GPIQFAQPRFPSEDIELGGVTIPRGAPVAPLALLAANTDPRRFPDPNKLI  
DRLAVGSEHGLGFGKIHRCLGQHLAYQEAVALQGLFTRFPDLSLAVPR  
EEIPWILRPGFTRTRTLPLKLV

>CYP105G5 (2515710949) *Salinispora arenicola* CNT857

LTIETTETPPADDSLAPLPRQFMQRDDPSKLPPALAALAEQSPVGRSTL  
PDGDPFWMVSGYDEARAVLSDPRFSSDRFRYHPRFKKLSGQLGERLRNDK  
ARAGSFINMDPPEHTRYRKLLTGQFTVRRMRQLTVRIEQIVTEQVDVMLA  
EGNSADLVSAFVVPVSLMICELLGVRVEDRTEFQRRAGLLQTDLPKQ  
AVENLEAQRAFMRQLVTDKRRTPADDMISGLVHHAGAEPPLTDELVGIA  
TLLLFAGLDTTASMLGLGMFMLLQRPEQMAVLRDDPSRIGDAVEELLRYL  
TVVSTGLFRFAKEDVVLGDEHIPAGSTVVVSLMAANRDGRHWPEPETLDV  
TRVRSSHLAFGHGVHQCLGQQALRIELTVGITELLRRLPNVRLAVPPADV  
PLRNDMITYGVHRLPILWDTF

>CYP1051A1 (2515710970) *Salinispora arenicola* CNT857

MATDAAITRARTVPAWKALPAAVRDTHRAFDVGNWSDGDVVRVSLGVSR  
PYLVTNPAHVQEVLEHERAAIYPRGDDTALWRSVRKLVGDGILAEGDAAWAA  
SRRVLAPMFRPARINAMVDTMADAIAGAVDDLHGAATAGTFIDVGRELSR  
IVCSAIMRVFFADRITVRDALRIMKAQETIVTAMAPRILAPLVPWWIPMP  
GDRRFRAAVRSIDDILLPVLRQAQRQPDDGDDLLSRLVRARADDGQALSE  
KRMRDDLVSMVAVTETSTVVLTWLWPLLANHPDVANRLYDEIDRVVGGG  
PVRGDHLAELTYTRMVLDELLRLYPAGWILPRRAATTDVLGGVRINKGAT  
VILSPYVTQRMATAWWGPTAEAFDPERFAAGREAADGRHRYAYYPFGVGMH  
RCLGEHLFNLEAILIVATLLSRFRFALTDTSMPGVKVAASTRPARTVEMI  
LKPVPAPVPAR

>CYP245A7 (2515711258) *Salinispora arenicola* CNT857

MPSATLPRFALTGWSRENIVNPYPVYQRYREVASVHRGEPGGDAPDTFYV  
FSYDEVVQVLSSNCFGRGRSLDAAKASVPVPAEQKALRAIVENWLVFMDP  
PRHTELRLSLNRSFSPRIVTELPRPRIARIAQELL SRLGQQVDVDLIVESFA  
APLPILVISELLGIPEERRAWLRANALALQEASSSRAGRVDVGYARAEVA  
AQEFTEYFREQVRLRRGRAGGDLITILANAQQRGAPVSLDAIVGTCVHLL  
TAGHETTTNSLAKAVLALREHPTVLDELRGAEGLTTDAVEEFLRYDPVQ  
AVTRWAHQD TTLGGCDIPRGSRVVALLGSANRDPARFPSPDVL D VRRPAD  
RHLSFGLGIHYCLGATLARAELEIGLQALLDGVP T L GYGTQHVDYADDLV  
FHGPSRLVLVNLGERCK

>CYP244A4 (2515711262) *Salinispora arenicola* CNT857

MSTTTNTELTEAPETNMPVDPGLFDCMPDLIAAAARVAPVVRI PYLGRHAW  
VVCDELVKQALTHPKMGKDIALVPEWMRQPGLMVTAQPDPEYARAMIMS  
DGENHARIRRIHAPVLSRPNTERWGERVADKVEGFLDELSQAGSGGSTEV  
NVVTNYTHKIPLAFI SEMGLPPEAEHRLRGITDIMLYSSDYAARREAIG  
GLFGAVEDWVRNPADLRDGVITGLLAASDGPDAAVTEGEVIVWTLGMIIT  
GYETTGSLISTSLYEAIRPPHERPKTDEDITAWIEETLRVHPPFPHPPTW  
RFPLEDIELGGYLIPKGAPVQVSIAAANRKPGEGADSFDAERRGHGHL SF  
GLGMHYCIGAPLVRLEAQIAVRGFLRRFPQARLSAETAVQWESEWMIRRM  
SVLPAVLS

>CYP166A4 (2515711305) *Salinispora arenicola* CNT857

MTDAISFELPWARTDKFDPPAVFDALREQRPLARMRYPDGHVGVIVSSYE  
LVREVLGDPRFSHSCAVGHFPVTHQGQVIPTHPQIPGMFIHMDPPEHTRY  
RRLLTGEFTVRRTSRLTGHEVERVATEQIEVMREHGAPADLVATFARPLVL  
RVLSGLVLGPLYGERDRYLHAVTLLHDAEADPAEAAAAYEQAGAYFDEVIE  
RRRRQPEDDLISTLVGDGELTGEELRNIVTLLLFAGYETTESALAVGMFA  
LLYHEDQLARLRADPTKIDAAIEELLRYLTVNQYHTYRTASEDIELHGEV  
INKGDSVTVSLPAANRDPARFACPAELDIERETSGHVAFGFGI HQCLGQN  
LARVELRAGLSALLRAFPNRLRLAVPADEVPLRLQGSVFAVKNLPVCW

>CYP105J3 (2515711437) *Salinispora arenicola* CNT857

MTDSVAFPQGRVCPHQAPAGYRPLAVQRPLAQVTLYDGRRVWAVTTRDLA  
RRLLVDPRISSDRTPAWPAIVPIVAAA V N D A Q Q K V L K I A T A L V G T D G P E  
HKAQRKMLIPSF T FRMNALRPMIQEIVDQQLD EMIKSGAPTDLIPAFAS  
AVPVTVLYRLMGIPDDDHGIF E K L S H Q L L A G P N A N E A Y D Q L M G Y M S R L I A  
ERRRNPGEGLVDDLLAQHGANDDADHDELVSTLVVQVAGNHGTTGSMIAL  
GLFALLQHPEQLAELRADPSLMPTAVDELLRFLSVPDVATRLAADDIEVE  
GTIIRKGDGVFFITSLINRDTDVHDAPNSL G W H H A S A A D H L T F G F G A H Q C

LGQSLARITMEIALGALIDRLPSRLAVPAEEVPFLPAASLQVIAELPIT  
W

>CYP107AX13 (2515711571) *Salinispora arenicola* CNT857

VTSPPHVAFGHLLLRDPHGOYNALRGQAPVHHIRTPDGAPAWLVMRYDDV  
RAALTDPRLSVDKRFSDTDGEHGSSLPPELDAHLLNRDPPDHTRLRRLAA  
AAFTPRRVADQAPAVATIVDALLDGVAGQDQAEIIGGLASPLPLQVMHEL  
LGLPTQTSVDFRNWTNTLLSADANQPAQSRSAMATMRQFLMGQLARKRAQ  
PGDDLLTGLLAARDDDDRFTDDELLAMVFLLMFAGYDNTAALIGNVTHAL  
LTDAGLHDAVRAGSVDLDSVVDEVLRWNPSFPLAVRRFAREPVTIAGHTI  
PAGDRVWLCLASANRDPAQFTEPDELGITPARRPHLAFGHGHIHYCLGAPL  
ARLQTTVAVASLLDRYPGIRLAVPAHELWRESFRVRGLAALPVRL

>CYP105AB8 (2515712007) *Salinispora arenicola* CNT857

MTETASSRLTDTEFPVQRECPFAEPVEYEQIREQSSIAMVRLTGGGEAWW  
ISGHEQGRAVLADRRFSSDRKANFPFVSTDPAIRKRLHAQPLSLISMDG  
AEHTQARRALIGEFTVRRLAALRPRIQQIVDQCIDEMLTTDQHCADLVKA  
LSLPVPSLVICELLGVADHDFQEHATLVRRTASEVRQHSIDELNA  
YLGALIDRKLASPDLLGRQIARQHRDGTFRSSMVSLAFLLLVAGHET  
TANMISLGVVGLLQHPEQLAMIKNDPKTPLAIEELLRFFTIVDSVTSRV  
ATEDVRFGDTTINAGDGVVVSGLSADWDPTVFADPDRLDLERGARHHLAF  
GFGPHQCLGQNLARLELQIVFDTLFHRIPTLRLAAPLDKIPFKTDAAIYG  
ARELPVAW

>CYP162N1 (2515712293) *Salinispora arenicola* CNT857

MGLPSEVDLAEPDLADPDLYAEGDPDAEWAWLRAHRPVYRNPAGATAEFW  
ALTRYRDALQVYRDPSTFSSERGMVLGVDPVAGDPAAGRMLVVTDPPRHP  
KLRRIVSGIFVPRMTMRLEGRVRSVLDQLLHRVVDGAGRCDFVNDVAARL  
PVAIIICELLGVPADEQDWMYHLTSTAFFFFGDPAGSAEVSASVERAEAYGDI  
LLYYGELAAERRRRPGDDLVTLLVHADLDGEPLDVEDVLVNCTNLIIGGN  
ETTRHAASGGLLALAQRPELWRRRLRETPTAVPTAVEEVLRWTTPGMHVLR  
TATRDTEIGGVPIRAGERVVVWNAANRDEDVFADPQRFIDIRSPNRHIA  
FGQGGHHCLGAALARLELTILFEEMAKQVTNVRLTGPVRRVRSCVLRGIR  
ALPVELVT

>CYP107AY2 (2515712684) *Salinispora arenicola* CNT857

MTAEPTPIPRSGARLGQEYDQLRKTGDVHQVLLPDASLAWLVTNPEVAAR  
ALADPRLALNRRNSRGGWSGFALPPALDANLLNLDAPDHTRLRRLVGPAP  
SPQRVAALRPGIRRAAEHLDTLVATSGPTDLVTGYCNPLSVQVIADLMG  
VPEAGRTNLRATDTMLTSYPPDRDAIRRAVTELHGYYVDLIDIKQQQPG  
DDLLSALVTIEQDGRLSRDELTSLAFLILFAGYENTANLIASAVLWLLD  
HGGLNVVPISEAIEATLRHEPPAPVAIRRFPTEDIIIGGV TIPAGDTVLL  
SVAAATRGADGNAARLAFNGPHYCLGAALARVEAEEALTVLARRLPGLT  
LAVPPSQVRWRPTFRTHGPAELLVGW

>CYP107EU1 (2515712989) *Salinispora arenicola* CNT857

VTIGQTLPLVYSPEFTRDPYAIFARLREQAPVCRVTTHRGMSAWMVTRH  
ADVRALLADNRLAKDGNRIGELMPRHSTLTGAATGFPPGLTTNMVNSDPP  
DHTRLRHLVGREFTGHRVEGLRPRIEEIVDDLLDGVAAACGDEADLAETLA  
RRLPIAVIGELLGVPEADRAEFFRWADTLYGGTASPEALGQAYNAIVDYL  
GRLCDAKRDPADLLLTALVQVSADEDRLSREELVSMALLLLLVAGHETTS



KQISNGVLALLLNPEQLKLLKAQPARTAGAVEELLRFEGPSLSASLRFTT  
EPVEVAGVVIPEGEFVLLSLASGNRDPEKFDPDPRLDITRSTQGNLAMGH  
GIHHCVGAALARLELEIVLSRLVARFPQMQLAVEADDLEWLVNSFFRAPL  
HLPVSLRR

>CYP1198B1 (2515713299) *Salinispora arenicola* CNT857

MSGELTDQRTAPGAGGNPLRSLMDHGIRANPYPLFGELREAGPTAVEDGS  
VVLFGHEYEHCSQILRHRDMGSDTSEAPSIKGFVVDDAERAGSSIFFMDQP  
GHGRQKRLVSKSFTPRIVKSFGPQITHIVDGLFEDFRDRGELDVVTDLAY  
PVSIGIICDLFGIPDDERDMLKEWSDDLALSTELPTLGAAIGVLNVFTRD  
EINRFGSVAMAAHAYFADLIHRRRKNP GDDLVSLLATESNGERLTRFEV  
TSVLATLFVAAHESTTNLISGGILALLRNQDQMAVLRENPGITNVVDES  
LRYDPPVHLAARMARARTTIGGYDLDPGTIVVVLMAAGNRDPRAYENPDV  
FDVNRKIRNVSLAFGAGAHFCIGSGLAKLEAEIAISAFQRLKHPEVDES  
SLEYRRHIVVRGLEHMKVAFQP

>CYP211B13 (2517379950) *Salinispora pacifica* DSM 45548

MDASEAVALLMSPPGRLDPYPTYERLRAHGTVVPTAAGFFVVTGYTEADT  
VLRNPRFGVMDDEEREGVFPHWQES PAMMSISQSMIRANPPDHSRMRLA  
AKAFTPRRVAALREVVAQAADGLVDGMIRAGRGGAPVDFLGSFAYPLPVA  
VICALLGVPAADWAQFRRWASDLTGVLPEEITPQELAVADAGARELRDYF  
TELVAQRRRAPADDLTALVQAHDADGDRLSGEELLANLVLLLVAGFETT  
TNLLGNGLVLLNHPDSATALRDQPELAPSYVEELLRYDSPVQLTTRTVR  
ESVPLAGVELPAGSWLLVLLGAANRDPARFTD PARFDPRAQSPPLSFGA  
GAHYCLGAGLARLEAQVAFPLLLRRLPELALAGEPTRRNRLTLRGYETLP  
VTVGAVAADHGTAPGVALGTP

>CYP105BL6 (2516872158) *Salinispora pacifica* DSM 45546

MSSHPAAPGPETATPLHTLAPELTFPQFERATPFDPPEAYTELSGRCPV  
APVRMADGKPSWLITSFEGVRAALSDPRLSSDMSHPGFNRTGKPVDDL  
KDTLGAMDGERHRYRRLMTGELTVRRAKAMRPVITQITDEALDQLAAAG  
PGADLVKHVALVVP SRVACHLVGIPLSEYELFTGMAAKLMEATSSADQIA  
ALQDMVSYFDKLVTDREHHRDDLLGHMVRRYLSTGELTREMLIRLAWTT  
MAAGQETTAHMI GLGVAALLRHPDQLELLRREPHLMPGAVDELMRYLPMI  
QFGIPRVAMDDVEVDGQTVTAGEGVVALPPLANRDP AVFERPDELDVRRN  
ARQHLSFGYGPHQCPAHALARLELEVVSRLLERFPTLRLADGDADLKVQ  
DEDIMYNVSELAVAW

>CYP107AY7 (2516873803) *Salinispora pacifica* DSM 45546

MRAEPAPIPRSGARLGQEYDQLRKTDGVHQVLLPDTSLAWLVTSPELVSR  
ALADPRLALNRKHSRGGWSGFALPPALDANLLNLDAPDHTRLRRLVGPAPF  
SPQRVAALRPRIERTAEELVDTVVATGSPVDLVTGYCTPLSVQVIADLLG  
VPEARRTDLRAWTDMLTSYPPDRDAIRQAVVELHGYYVNLIEAKRQRP  
DDL SALVATEQEGDRLTRDELTSALFLILFAGYENTANLIAS TVLRLLG

HGSLRGARASEAIEETLRLEPPAPAAIRRFPIEEMTIGGATIPAGDTVLL  
SIAAATRGTDGNSARLAFNGPHFCLGAALARVEAEEAITVLARRLPSLA  
LAAPGAPVRWRPTFRTHGPAELLVTW

>CYP105AB34 (2516875228) *Salinispora pacifica* DSM 45546

MTETASITTPGTSSTATSGPGSGEVTDEFFPVERGCPFSTPAEYEQIREH  
SPLTKVRLTTGREAWWIAGHELARAVLADRRFSSDRRRDNFPFVSTDPET  
RKQLQDQPTSMGLMDGAEHAQTRRALMGFTVRRMAGLRPRIQQIVDQHI  
DEMLSSEQRSADLVEALSPLVPVSLVICELLGVFPYADHDFQARSGLVRH  
HTPSKVRVRIQEELNTYLGLIDRKVADPTDDLRSRQIAKQHAAGTFDRT  
SLVSMAFLLLIAGHETTANMISLGVVGLLQHPDQLAMIKDDPEKTPPAVE  
ELLRYFTITDVTARVATEDVQLGDTTITAGDGVVISGLAADHDPTVFTD  
PNQIDLERGARHHVAFGFGPHQCIGQTLARLELQIVFDTLFRRIPTLRLA  
APLDDIPFKSDAIYGAEEPLPAW

>CYP1005A8 (2516875471) *Salinispora pacifica* DSM 45546

MSAVLFRSWTKTAGPHWPAVTRVADQQGTEHLVVTEHELVRQVLTQVQTY  
RPDNALDAVTPIPVPAALRVLAGHGFRLLPPTLANNGGVSHPAIRALVADAL  
HPAKVAAQRPWLTKLVAERVAAIGATLDSGGSADLHAELNADLPLLVLAR  
LVELPDAPVSAVKQFARAALFLWAPLDADRQLALADEVGRFHQVLRIFA  
DTGGGLAAALRTTGHPDVLVGALFFLLVAGQETTSQFLTLLHRLAGEP  
TVRAALRDGGVSVANVVEEGLRLEPPIVTVRRVAAVDSTLGGTAVPAGTS  
VLLWLARAGRDPAIVPAPDEFPRPGQQRGSRRHLAFGAGAHRCCLGDQLARME  
AAVVVEQAAPLLDGISVVRAPWYPDNLTFRMPDAFVIRR

>CYP211B14 (2516875818) *Salinispora pacifica* DSM 45546

MDASEAVALLMSPGRLDPYPTYERLRAHGPPVPTAAGFFVVTGYTEADA  
VLRNPRFGVMDDEERDGVFPHWQDSPAMMSISQSMIRANPPDHSRMRRLA  
AGVFTPRRVAALREVVAQADELIDEMIRAGRGGAPVDFLGSFAYPLPVT  
VICALLGVPAADWAQFRRWASDLTGVLPEEITPQELAIADAGATELRDIF  
TELIAQRRRDPTDDLTTALVQTHDADGDRLSGEELLANLVLLLVAGFETT  
TNLLGNGLFVLLTHPESATALRDQPELAPGYVDELLRYDSPVQLTTRTVR  
ESVPLAGVELPAGSWLLVLLGAANRDPARFTDPARFDPGRAQSPPLSFGA  
GAHYCLGAGLARLEAQVAFPLLLRRLPELALAGEPIRRNRLTLRGYETLP  
VTVGAVAVDHGTPAGAALSTP

>CYP244A5 (2516876216) *Salinispora pacifica* DSM 45546

MSATTNAELGEAPETSMPVDPGLFDCMPDLIAAARIAPVVRIPYLGRHAW  
VVCDELVKQALTHPKMGKDITLVPEWMRQPGLMVTAQPPPEYARAMIMS  
DGENHARIRRIHAPVLSRPNTERWGEQVATKVEGFDELDELKAAAGSNAEV  
DVVTNYTHKIPLAFISEMLGLPPAAEHRLRSITDIMLYSSDYAARREAIG  
GLFGAVEEWVRNPDGLRDGVITGLLAGSDGPGAAVTEGEVIVWTLGMIIT  
GYETTGSLLISTSLYEALRRPPHERPRTDEDITAWIEETLRVHPPFPHTW  
RFPLEDIELGGYLIPKGAQVQVSIAAANRQPGEGADSFDTERRGHGHLSE  
GLGMHYCIGAPLVRLEAKIAVRGFLRRFPQARLSADAQVQWESWMIIRM  
SFLPAVLS

>CYP245A11 (2516876220) *Salinispora pacifica* DSM 45546

MSSTTLPRFTLTGWNREDIVNPYPVYRRYREVAAVHRGEAGGDAPETFYV  
FSYDQVAQVLSSSCFGRGRSLDATAASVPVPADQKALRAVVENWLVFMDP  
PRHTELRSLLNRSFSPRIVTGLRPRIARIAQELLSRLGRQVETDLVEGFA  
APLPILVIAELLGIPAERHGWLRTNALALQEASSSRARRDTAGYARAEAA

AQEFTEYFREQVRLRRGSAGDDLLTILANAQLRGAPVSLDAVVGTGVHLL  
TAGHETTTNSLAKAVLALQAHPAVLEELRGADGLTADSIEEFLRYDPPVQ  
AVTRWTHQDCTLGGWEVPRGSRVVALLGSRNDRPARFPLPDALDVHRPAD  
RQLGFGLGIHYCLGATLARAELEIGLQTLNGLPTLGYPAQYVDYADDMV  
FHGPSRLILVNPGERFCQ

>CYP107AW6 (2516876309) *Salinispora pacifica* DSM 45546

METVTGTSA PPPVPYIADPYPTLARIRANGPVSIHLSDEGVPMWVIARYR  
EVRAALADPRFGQDARRAQALADNRVAGVTLGGDIVHMLNSDPPDHTRLR  
RHVQGAFTARRVAAMRPLVERITTSLLDGLAGRKTVDLVQDLAFPLPMLV  
ICELLGFPAEERNAYRSWSTAILTHDDDPAVFATALREMTDYIAVQLRIR  
RSRPGDDLLTELLAARDAGQLTDDEIVGMVFLLLIGGHETTNNLLGTATL  
ALLRNPDQHRWLLANRHALPEAIDEFLRYESPVAMATLRFTTTPVTVDDV  
VIPAGELVLVSLGGANRDPDRFPDADRLILDRRDTGHLAFGHGLHRCLGA  
FLGKLEGEVALGALLRRHPKLALATEVRQLQWRDTIMLRGLESPLVSLHG

>CYP107AX9 (2516876325) *Salinispora pacifica* DSM 45546

MTAQPAFVFDQRLLRDPHRRYNALRDQAPVHRVRTPDGAPAWLVTRYDDV  
RAAFTDPRLSVDKRFSGTDGEHGSSLPPELDAHLLNRDPPDHTRLRLRLAA  
AAFTPRRVADLRPAVEKTVSTLLDGLAGNDHAELIGSLASPLPLQVMHEL  
LGLPTQTSVDFRTWTNTLLSADANQPAQSRSAMANMRRFLIEQVAHKRAQ  
PGDDLLTGLLCVREDDDLTDDELVAMLFLLMFAGYDNTAALIGNAIAL  
LTNVELAEAVRTGSLAVDELVDGVLRWNPSPFLAVRRFAREPITIAQGTI  
PAGDRIWLCLASANRDPAHFTEPDEIGIADMRRPHLSFGHGIHYCLGAPL  
ARLQTTVAVASLFDRFPGIRLAVPVQDIQWRESFRLRGLVALPVSL

>CYP208A21 (2516876338) *Salinispora pacifica* DSM 45546

MTTTSIDRRRPPGPPRAAALSMLLTMSRDRLGMMTAAARAYGDAAWLPVG  
HKALYFFNHPDYAKHVLTDNSDNYTKGIGLVHARRALGDGLLTSEGELWR  
EQRRVIRPSFRSGRAPDQASVIAEEVASLVERLRARAGGPPVNVVTEFTG  
LTLGVLGRTLLDVDTALATVGDFAAAVQDQAMFELVTL SAVPTWIPLTR  
QRRFRRARAELEIRIVDDLVARRGDVSGRDDVLSRLILSTGAEPDARVRRQ  
RLRDELVTLLLAGHETTASTLGWTLYLIDRHPPVRELRRAEAAEVLGDRL  
PAYRDLPLDRFTTMVVQEAMRLYPVWLLPRRSRRADRVGPYVWPAGSDV  
VVSPYTMHRHPGFWEPEPDRFDPLRFDPRNAADRPRYAYLPFGAGPRVCVG  
SNLGMTEAVIAVAMLCRELRLVRVPTHAAVPEPMLSRLIRGGLPMSVHLA  
D

>CYP154M16 (2516876355) *Salinispora pacifica* DSM 45546

MPDRCPVLDPGSRDIHAEADRLRAQAPAVKVELPGGVHAWTSITSYDVVRR  
LLLDNRNVTKNARNHWPKFINDEIPPDWEMISWVAMDNMVTAYGKHLVRLR  
RLIAKAFTAQRVETVRPQVEKLVDLDELGLAAETGEVVDLREKFCYPLPA  
LLIADLIGMTEQQRAQTAKAMDLMVDTTVSPEQAQAILTGWRTAMDELIA  
AKRREP GKDIASDLIAARDDENGGQLTDSELTDITIFAILGAGSETTINFL  
DNAVTALVTHPGQLELVRSGRAGWDDVIDEVLRVQCPLASPLRYAVTDI  
ELDGVTIPQGDPIILINYAAAGRDPALHGD TAGEFDVTRENKEHVSFGHGP  
HYCLGAGIARLVATIGLSRLFERFPDLRLAVPAEELQPLPTFIMNGHRAL  
PVRLVPAPAAATAV

>CYP211C6 (2516876599) *Salinispora pacifica* DSM 45546

MPDIEGLLARLYSAQGRQDPYPVYADLHAKAAIAALEPRPERQRVA AVAV  
GYDLVA AVL RDPEWFKQPPPGWRDQEILRILQSSMMFINPPDHGRMRHVF  
AGTFTPRRLGALEPVINRVTD ELLDRMADAGPGEVDFVAEFAYPLPARVM  
AEFIGIPATELAWYRERVDRVDAFLDVAGKTPERLAAAANAAGAE LRFFYR  
ELLAHRRRTPEGEDLISGLVEAVDAGGVELTEDELISNLIVLFNASFVTTV  
YLLSNGLPVLLAHPEVAAAALTSSPELAAGAVDEILRLQTPVHLLARAAPR  
DTVLGGVSI PQGQNVLLLLIAAANRDP AHFPDPDRFDPRRSGPPSLAFGLG  
LHYCLGA AVSRLEGR LALPRLLSRFPRLRILEQPVYSGSLFLRGIDKLSV  
SPGGREHP

>CYP125A66 (2516876736) *Salinispora pacifica* DSM 45546

MTEPRIPVGFDFTDPAVLERRVPREEFAELRR TAPVWWNAQPKGSAGFDD  
DGYWVVTRYADVM AVSRDSE TYSTRENTAIARFQPGTTQADREMQRVIMI  
NVDPP EHTKLRAIVSRGFTPRAINALRGSLGERAERIVRDAAGRGAGDFV  
TDVACELPLQAI AELIGVPQHRRKVF DWSNQLIGYDDPAYGVDPLAASA  
ELLYAMEMAHERQRNPSDDLVT KL VNAQIDGEHLTADEF GFFVMLLAVA  
GNETTRNAITHGMLAFLENPEQWELFKAERPRSAVEEII RWATPVNVFQR  
TALVDTTLAGQAI SAGQRVALFYGSANFDES VFEEPERFDITRSPNPHLG  
FGSGVHFCLGANLARLEIELIFNSIADHMPDIRKVADPQRLRSGWINGI  
REL PVQYH

>CYP1278A4 (2516876960) *Salinispora pacifica* DSM 45546

MPSPVGAVVHPNPYPYAAAMVAERPFFHFDEQLDTWVAASAAAAQAVLAAP  
GCRVRPPHEPV PQGITGTGPAGDVFGNLVRMTDGE PQHRLKAIVTQTLGAI  
DRSAVAATAMQRRARQVLNDSVRTPYEQLMFELPAQVVATLCGLDPAAGGE  
ATRLVGHFVQCIPATASPEQQQRAA QAAAAGLQELLGPKLDDTQHGLLGEL  
VRMATHVGWTDRA PLLANGIGFLSQTYDATAALMGNTLLALSQQECELPT  
SEMALQRFVREVIRHDAPIQNTRRFTATPIRHGDVEVPAGQAVLVLLAAA  
NRDPAANPDPHMF RADRTTPNVFTFSAGAHHC PGETLAVTIVTTVVEQLL  
RVGFDP AKLSTRVTYRPSPNARIPVLTE

>CYP1005A1 (2540879996) *Salinispora tropica* CNY012

VSAVLFRSWTKTAGTHWPAITRVADQQGTEHLVVTQHALVRQVLT DQLT  
RPNYALDAVTPI PVAALRVLAGHRFRLPPTLANNGGVSHPAIRALVADAL  
HPAKVAAQR PWTGLVAERVA AIRRTLDSGGSTDLHAELNADLPLLVLAR  
LVELPDAPVSAVKQFARA ALELFWAPLDADRQLALADEVGRFHQVLRFA  
DTGGGLAAALRATGHPPDVLVGALFFLLVAGQETTSQFL TLLHRLADEP  
TVRAALRADSVSVADVVEGLRLEPPIVTWRRVA AVDSTLGGSTVAAGTS  
VLLW LARAGRDP AVVPAPDEF RPPGQRGSRRLAFGAGAHRC LGDQLARME  
AAVVVEQVTPLLDGVT VVRPPWYPDNLTFRMPDAFVVR

>CYP211B1 (2540880304) *Salinispora tropica* CNY012

MDASEAVALLMSPLGRIDPYPTYERLRAHG PVVQTAAGFFVVTGYTEADT  
VLRNARLAFEVMDDEL RDDVFPHWQDSPAMKSIARSMIRANPPNHGRMR  
LAAGFTPRRIAALREV VTAQADELADEMIRAGRDGAPVDFMG SFAYPLP  
VAVICALLGVPAADWARFRGWASDLTAVLEPEITPQELTVADAGASELRD  
YFTELIAQRRRAPADDLTALVQTHDADGDRLSGEELLANLVLLLVAGFE  
TTTNLLGNGLV VLLAHPDSATALRGQPELAPGYVDELLRYDSPVQLTTRT  
VRESVLLAGVELPAGSWVLVLLGAANRDPERFTDPTRFDPGRAQSPPLSF  
GAGAHYCLGAGLARLEAQVAFPLLLRRLPELALAGEPTRRNRLTLRGYET  
LPVTVSAIAADHGTPAGVARGTP

>CYP163B1 (2540880733) *Salinispora tropica* CNY012

VTAADTGRVSGESQTPAHTVDLADPATFANHDLTGFWQQLRDEEPIHWN  
PPTAGRRGFWVVSRYADILDVYRDDVFTTSEGRNVLVTLLAGGDAGAGRM  
LAVTDGPRHAELRKLLLRALGPRVLAPVCAAVRTNTRQMIREAVTKGEC  
FASDIASRIPMMTISNLLGVPDADRAFLLSLTKTALSADDESISETESAM  
ARNEILLYFQDLMEFRRDHPGEDVVSMLVNSSIDGAPLSDDDIVLNCYSL  
IIGGDETSRLTMIDSVNTLAAHPQQWRRLKDGQCEIDKAVDEVLRWASPS  
MHFGRVAARDTILHGVIRADDIVTLWHASGNRDERVFHRPEVFDLGRTP  
NRHLSFGHGPHYCIGSYLAKVEISELLIALRDLTSGFETTGEFQIRSNL  
LTGFATMPVRFVPDRAGLARDALDG

>CYP107NH1 (2540881005) *Salinispora tropica* CNY012

MTEPVVSLMDPEFWNDPVSAYERLRGSGPLIRMGLPGVPPVWLVTSCHEV  
KSALSDPRFVVDAAANVPGHHGPGIVDKMMAASGMPDEFRDYMTNMMFTDG  
KDHSRLRLRVTPGFSARRIRAMRPRVNQIAEELVESLAEKSGGELIADFS  
APLTTTVCICELIGVDRADQAQMGAWMHDTTGERVVSGRAMVNYTRDLIE  
RRRAEPADDMISAMIRSGDEAGDRLSDAEIIAMALLLINAGHHSTAQFIP  
NAVLVLLDHPEQLARLRAEPGQLPSAMDELMRLANPVPIATPRYATEDME  
FAGVAVRRGEALTGSLEAANFDPERFPAPRQLDTRDLGRGDGHLISFGAG  
PHYCPGAALARLEGEIALDHLLLRDNLRLAVERDEVYVDVSLGLRMLS  
SLPVRL

>CYP247A8 (2540881011) *Salinispora tropica* CNY012

VRLNPEAGRPVALGSIDLFPDLLASGDPHSVWDVMRSEAPLHRQVLPDG  
RVFWSVTRYEDVCRVLGDHRAFTSERGTVFTQLGADDIAAGKLLTSTDPP  
RHTEVRRRAIGGRLTARAVAHWEDLVRRAVVRFLPALDGGCWDLAERAQH  
LPLIIAGSLLGIPDSWEKLVQLTGMVTAPSDPMFGLDSEAATLAIHHE  
IFDYLSDLVRRRRSVGTGGDSLDDHLMTVRAGAGPLPDEEVVYDSYSLIL  
GANATTPHTLSGIVLTLAERPEQCDKVRADASLIPSMVEEGLRWTSACN  
FMRYATVDTRLTGGTVPAGEAVVAWIASANRDESQFADPHTFDVTRGENR  
HVAFGFGPHYCIGAPLARMTARIFFEELFRLFWSIEIDGEPQHLSNFIA  
GMTHLPVVTRKRAQV

>CYP107Z27 (2540881021) *Salinispora tropica* CNY012

MSCTHPCHSLMDPTLIDDPAGGFSRIRDESPLAHAMVPGVDGPVWLVRH  
ESVRKVLGDRRFVNDPTNVPGSSTPDLWAHAALAQGVPHYELEHVRSMQL  
LDGEVHARLRLRLVSRAFTMRRTALRPRMMQLTEELLDLLPAKAEDGVVD  
LVEHFNYVQPISVICALVGVPAAADRAAWIRWSRALTSMESGTIGDAVTGM  
VDNIRALIEQRRAEAADDLLTDLVRVRDADGDRLSEREMITMVITLVTAG  
HDSTGLLLSNGLAALLTHPDQLAKLGADPSLGPQAFDELMRWCSAIVAAR  
PRYATEDVELEDGLVRRGDVVIPVLVSANYDPEVFEDPHRLDISRVHEQR  
RFHHVGFGDGLHYCLGAALAKHEAAIAITALLERYPGLELAVPAQRLRRA  
RLPLTWRLDSLPLVRLGIGG

>CYP211C1 (2540881040) *Salinispora tropica* CNY012

VLDVEGLLTRLYSEQGRQDPYPVYADLHAQGAIAALAPRPEGQRVAAVAV  
GYDLVGAVLRDPEWSKQPPPGWMEQEILRTLQSSMMFINPPDHGRMRKVF  
AGTFTPRRLGTLEPVINRVADELDRMADAGPGEVDFVAEFAYPLPARVM  
AEFIGIPATELAWYRDRVDRIDAFLDVAGKTPERLAAANAAAAELRVFYA  
DLLARRRRTPGEDLISGLVEAVDAGGVQLTEDELINNLIVLFNASFVTTV

YMLSNGLPVLLLEHPEVAAALADDPPELTAGAIDEILRLQTPVHLLARAAPR  
DTVLGGVPI PQGQNVLLLLIAAANRDPAHFPDPDRFDPRRPGPPSLAFGLG  
LHYCLGAAVSRLEGRLLALPRLLSRFPRLRIMEQPVYSGSLFLRGIDKLSV  
SPGGRMHP

>CYP125A15 (2540881173) *Salinispora tropica* CNY012

MTEPRIPVGFDFTDPAVLERRVPREEFAELRRTAPVWWNVQPRGSGGFDD  
DGYWVVTRYADVMAVSRDSSTYSTRENTAIARFQPGTTRADLEMQRVIML  
NVDPPPEHTKLRAIVSRGFTPRINALRGSLAERAERIVRDAAVRGTGDFV  
ADVACELPLQAI AELIGVPQHHRKVFWDWSNQLIGYDDPAYGVDPLTAAA  
ELLAYAMEMANERQLNPSDDLVTCLVNAQIDGHLTTDEF GFFVMLLAVA  
GNETTRNAITHGMLAFLEHPEQWELFKAERPRSAVEEII RWATPVNVFQR  
TALVDTTLGGQAI SAGQRVALFYGSANFDES VFEEPERFDITRSPNPHLG  
FGGSGAHFCLGANLARLEIELIFHSIADHMPDIRKVAEPRRLRSGWINGI  
REMPVRYR

>CYP208A22 (2540881272) *Salinispora tropica* CNY012

MTVIADRGGRI PPGPPVTASLRLLLLALGRDRLGMMTSAAA EYGDVARLPV  
GPKKLYFFNHPDHAKHVLADNHANYQKGIGLVHARRALGDGLLTSEGEW  
RKQRRVIQPAFQNRRLAQYAGAVGQEATRLVARLATRVDGPPVDVLDEMT  
RLTLGVLGRTL LLD AELTGFGVGESFAAVQDQAMFELET LNTVPTWIPLR  
RQRRFRRARQHLQEVVDVLA AERGQAVEGRDDVLSRLILSTRAEADPQLG  
RERLRDELVTLLLAGHETTASTLGWSLHLLDQHPELRERVRHEARTVLGD  
RVPAYEDLHQLRYTAMVVEEAIRLYPPVWILTRKARAEDEIGGYRVPAGA  
DILICPYTLHRHPRFWTEPERFDPERFDP SHTTDRPRYAYIPFGAGPRFC  
VGNNLGMLEATLVLA VLLRDLRLEGLPGRAVVPEPMLSRLVRGGLPMTVR  
RVD

>CYP107AW1 (2540881835) *Salinispora tropica* CNY012

MESVTSTSAPPPVPYIADPYPALARIRANGPVSILHSDEGIPMWVIARYR  
NVRAALADPRFGQDARRAQTLADNRVAGVTLGGDVIHMLNSDPPDHTRLR  
HLVQGAFTARRVAAMRPLVERITTSLLDGVGGRQTVDLVQDFAFPPLMLV  
ICELLGFPAEERDAYRSWSTAILTHNDDPAAFATALRDMTDYIEVQLRHR  
RARPGE DLLTELLAARDAGQLTDDEIVGMVFLLLIGGHETT VNL LGTATL  
ALVRNPDQHRWLLANPHALSEAIDEFLRYESP VAMATLRFTTAPVTVDDV  
VIPAGELVLVSLGGANRDPDRFPDADRLILDRRDTGHLAFGHGLHRC LGA  
FLGKLEGEVALGALLGRYPGLTLAAEVRQLRWRDTIMLRGLES L PVS LHG

>CYP107AY1 (2540882122) *Salinispora tropica* CNY012

MRAELAPIPRSGARLGQEYDQLRNAGDVHQVLLPDSSLAWLVTNPKLVSR  
ALTDPRALNRRHSRGSWGFALPPALDANLLNLDAPDHTRLRLRVGPAF  
SPQRVSALRPRI RRTAEHLLDTLVATSGPVDLVTGYCTPLSVQVIADLMG  
VPEAGRADLRWTDTMLTSYPPDRDAIRQAVVELHG YVVDLIDTKRQQPG  
DDL LSALVTIEQDGDRLTRDELTS LAFLILFAGYENTANLIAS TVLRLLD  
HGGLRGVQLPEAIEETLRLEPPAPA A VRRFPTEEMTIGGATIPAGDIVLL  
SIAAATRGTAGNAARLAFGNPHFCLGAALARVEAEEALTVLARRLPD LA  
LALPVAQVRWRPTFRTHGPAELLVTW

>CYP105AB2 (2540882434) *Salinispora tropica* CNY012

MTETASIAATRTASGQLTDAEFFVQRCFPFTAPTEYEQIREESSIAKVRL  
KNGGEAWWIAGHELGRSVLADRRFSSDRRDNF PFVSTDPETRAQLQSQP  
TSM LGMDGA EHAQTRRALMGFTVRRMAGLRPRIQQIVDQHIDEMLATPQ  
RSLDLVEALS L PVP SLVICELLGV PYADHDFQGLTG PLLRHTTPPEVRL

RIQEELNTYLGTILDRKLTDPDLDLLSRQIAKHRDNGTFDRASMVSLAFL  
LLVAGHETTANMISLGVVGLLQHPDQLAIKDDDPDKTPLAVEELLRYFTI  
ADSVTARVATEDVQLGSTTINAGDGVVISGLAADRDPTVFAEPDRDLER  
GARHHVAFGFGPHQCIGQTLARMELRIVFDTLHFHRIPTLRLAAPLDDIPF  
KSDAFVYGIEELPVAW

>CYP107AX1 (2540882940) *Salinispora tropica* CNY012

MTSRPTAVFDQCLLRDPHSRYNALRDQAPVHHVLTDPGAPAWLVTRYNDV  
RAAFTDPRLSVDKRFSGTDGEHGSSLPELDAHLLNRDPPDHTRLRRLAA  
AACTPRRVADLHPAVERIVSTLLDGLAGHDRAELIGSLASPLPLQVMHEL  
LGLPTQANIDSRTWTNTLLSADANQPAQSRAAMANMRRFLIEQLAHKRAQ  
PGDDLLTGLLAAREDDRLTDDELVAMVFLLMFAGYDNTAALIGTVTHAL  
LTNAELHEAVRGGSLALDELIDEVLRWNPAFPLAVRRFAREPITIAGQTI  
PAGDRIWLCLASANRDPAQFTQPDELGIIGLRRSHLSFGHGIHYCLGAPL  
ARLQTTIAVTSLNRFPEMRLAVPAHDIRWRESFRLRGLIALPVYL

>CYP1004B1 (2540883477) *Salinispora tropica* CNY012

MTTSALAPRFDALDPNVVEDPYPEYARLRAAGPLCRLGPGSWGVTREFADV  
TNLQHDPRLGSEFPAGYHEISVGDPASAFFQRMVLYRDPPDHIRLRLRM  
SGAFTPAVVRRLRSHIEDLVDELLAPALAAGRMDLVPELAYPLPVRVVC  
LMGIPPESTEDVRHHATNIGRAFTAVVPEQARTEADEAVSWLREHLGALL  
EQRRSHRGDDLLSRLDAEESGDNLSADEIVDNTVFSFFAGFETTVHMIT  
TGTAALLAHDPQLARLRADPSLVTTAVDEFWRWDAPIQGTARYVREPIEI  
GGRTIRRGVVLVLMIGSANHDERRFAQPDRLDVGRQDNPHVAFGGGAHLC  
LGAFLARMEGAVVFDRLARLAVLEPDGPTVREPNTFFRAYASVPVRIGDR

>CYP1004A1 (2540883481) *Salinispora tropica* CNY012

MRANTARPHLSAAFLATKDDPYPAYAELRARGPLTRAELGQWLVTGHGAV  
SALLRDGRLESRMPEYTRLTLGDSPGVDFLHRIVLTRTPPEHTRLRRI  
GRALGTPVVRRLHDRIAAATDALLEPALDRGRLDVVTELAVALPVGVVCD  
LIGIPTGDRPAVLTRVTALAKVFDAANLSPADLADINTALPWLHDYFGDL  
LAVRRAGSGGPTLTEMWEEASDRLAVADFVDNMLFLFHAGFETTMGLV  
SNGVAALLNNPEQLGRRLRADPALVPSAVEEFLRYDAPIQNVIRVARKPVE  
VAGQKIRAGRTVLLLLGAANRDEEVFADAERLDVGRDPNPHLGFGGGLHH  
CVGTALARLMAVVVFERLVDRVTVLGPAAPAVRRRHASLSYDHLPLAVA  
AR

>CYP125G1 (2540883520) *Salinispora tropica* CNY012

MSTEVVSTGNRADIAPATYAAGVPYAEFARLRRDKPVSWVPEAALWRRS  
GEGRILSQPGFWAVTTHEGVVAASRQPEVFSSGRQGAFLADPRTTADLE  
QARQLLVNMDAPQHARVRKLVTAFTTPRAIRALGDSVTAHARNLVERAVR  
QEECDVVADLAAELPLLVLADLLGLPREDRHLLYQWSNNLVGFDDPEYGG  
GDVEAYRKTFEAFQYALSVAGERRRAPREDLMTLLATSEVDGRRLTDRE  
FCNFWLLLVLVAGNETTRHLITGSVLALVDNPMQRERLVADDTLPLSAVDE  
LLRWVSPIMQFRRTAIVDTELCGTPIAAGDKVVLWYTSANRDAAVFEAPD  
ELRLHRNPNNHLSFGMGPHFCLGAHLARLEARTMLRELAPHLSRFRLTGP  
VIRLESNFVNGVKSLLPGSFTGQ

>CYP124M3 (2540884167) *Salinispora tropica* CNY012

MTVPVELDAVDLSDNDFWTKPLEYRHAVFNALRAQPGLPHFASPEFGSAP  
RGRGYYALTRMDDVLAVSRNPSTFISGKGNVAMEVPAEFLDQSLITMDNP  
RHARLRRIVSRGFTTKAVTALMDNASQMAKQIVDEVVEQGECDVVDISA  
KLPLGIIICNMMGIPDSQQQFVFEQTNVMLGVQDPEYVGEQNDAMLAMSV  
SQELADLMHELATLRAKNPTDDLISKLLSAEVNGEALTPSELAHFFILLT  
GAGTETTRNAISWGIQLLTQSPEQREAWLSIDIGVTPTAVEEIVRWSSPV  
ISQRRRTVAEDAEPVKLAGQLLGPDKVLMFYGAANRDPNYFAHPEGFDVR  
RSPNPHVGYGGPGPHFCLGAHLARLEISVMFRELLTRIPDIHATGEPARL  
KSPLINGIKRLPVAFTPGAR

>CYP107E3 (2540884601) *Salinispora tropica* CNY012

VTIDQEIRKYPFCESPGIGIDPTYGLLRSTEPLARVQLPYGEVSWLATRY  
EDVKTVLTDPRFSRAAAQKQDQPTREEMTYEGIIIGLDPPDHTRLRKL  
KALTARRVNAIRADAQRIANEYVDGMIAGKSPGDLVELFALPYPVTVICE  
LLGVPFEDRAQFRIWTEGLTSTSEQLMVYAEQLFGYMGKLVQRREEPTD  
DLLGALVKARDEGDRLTEQELLSIAGVGLLLTGNETVSTHINPFIYALLT  
HPELMAQLRADRSVPAAVEELLRMIPLNPAAMFPRYAVEDVTLSGITVR  
AGEPVLVSLPGANRDPEVFENPETFDFTREQNPVAFGHGPHHCLGAQLA  
RMELQVALHTVLDRFPDLSLADGDEGVSWKSGLLVGRPSRLLVAW

>CYP105BL2 (2519878343) *Salinispora arenicola* CNY234

MSSHSAAAPDPETATPLHTLAPELTFPQFERSTPFDPPQAYTELSGRCPV  
APVSMADGKPSWLITSFEGVRTTSLDPRFSSDMSHPGFNRTGKPVDDLL  
KDTLGAMDGERHRYRRLTGELTVRRAKAMRPVITQITDEALDQLAAAG  
PGADLVKHVAFVVPSPRVACHLVGIPLSYELFTGMAATLMDSTSSDDQFA  
ALQNMVSYFDTLVTDREHHRDDLLGHMVRRYLATGELTRDMLIRLAWTT  
MAAGQETTAHMIIGLVAALLRHPDQLELLRREPHLLPGAVDELMRYLPLI  
QFGIPRVAMDDVEVDGQTVTAGEGVVALPPLANRDPAVFERPDELDVRRN  
ARQHLTFGYGPHQCPAHALARLELEVYGRLLERFPTLRLADSDADLKVQ  
DKDIMYRVSELAVTW

>CYP1051A1 (2519878753) *Salinispora arenicola* CNY234

MATDAAITRARTVPAWKALPAAVRDTHRALVDVGNWSDGDVVRVSLGVSR  
PYLVTNPAHVQEVLHERAAIYPRGDDTALWRSVRKLVGDGILAEGDAAW  
SRRVLAPMFRPARINAMVDTMADAIAAGVDDLHGAATAGTPIDVGRELSR  
IVCSAIMRVFFADRITVRDALRIMKAQETIVTAMAPRILAPLVPWWIPMP  
GDRRFRAAVRSIDILLPVLRLQAQRQPDGDDLLSRLVRARADGRALSEK  
RMRDDLVSMAVTTETSTVVLTLWLWPLLANHPDVANRLYDEIDRVVGGGP  
VRGDHLAELTYTRMVLDELLRLYPAGWILPRAATTDVLGGVRINKGATV  
ILSPYVTQRMATAWWGPTAEAFDPERFAAGREAADGRHRYAYYPFGVGMHR  
CLGEHLFNLEAILIVATLLSRFRFALTDTSMPGVKVAASTRPARTVEMIL  
KPVAPVPAR

>CYP1005A1 (2519879007) *Salinispora arenicola* CNY234

VSAVLFRSWTKTAGTRWPDVTRVADQNGTEHLVVTRHALVRQVLTDAQTY  
RPDNAMEAVTPIPVAALRVLAGHRFRLPPTLANNGGVSHPAIRALVADAL  
HPTKVAAQRPWLTGLVADRVASIRTTLDSSGPVDLYADLTADLPLLVLAR  
LVELPDAPVNAVVKQFARAALFLWAPLDADRQLALADEVGRFHQVLRFA  
DTGGGLAAALRATGHSPDVLVGALFFLLVAGQETTSQFLTLLHRLSGEP  
TIRAALRAGSSSVADVVEEGLRLEPPIVTVRRVAAVDSTLGGTTVAAGTS  
VLLWLARAGRDPVVAAPDEFPRPGQRGSRRHLAFGAGAHRCCLGDQLARME  
AAVVVEQATPLLDGVTVVRPPWYPDNLTFRMPDAFVVRR



>CYP125A41 (2519879332) *Salinispora arenicola* CNY234

MTEPRIPAGFDFTDPEVLAHRVPREEFAELRRRTAPVWWNAQPRGSAGFDD  
DGYWVVTRYADVMVTSRSDTYSTRENTAIARLRPDTTREDIEMQRVIML  
NVDPPPEHTKLRAIVSRGFTPRAINALRGSLAERAHIVRDAAVRGVGVDFV  
SDVACELPLQAI AELIGVFPQHRRKVFDWSNQLIGYDDPAYGTDPLTASA  
ELLAYAMEMAERQRSPSDDLVTCLVNAQIDGEHLTTDEF GFFVMLLAVA  
GNETTRNAITHGMAAFLDNPEQWELFKAERP KSAVEEII RWATPVNVFQR  
TALVDTVLGGQAI SAGQRVALFYGSANFDEAVFEDPERFDITRSPNPHLG  
FGGSGAHFCLGANLARLEIELIFNSIADHL PDIRKVAAPQRLRSGWINGI  
RQMPVRYR

>CYP211C1 (2519879482) *Salinispora arenicola* CNY234

VVDVEELLTRLISAQGRQDPFPVYADLHAQGPIAALPPEPERRRVA AVAV  
GYDLVGAVLRDPEWSKAPPPGWTEQEILRTLQTSMMFINPPDHGRMRHVF  
AGTFTPRRLGALEPVVNRVADELDRMADAGAGGLDFVAEFAYPLPARVM  
AEFIGIPETELDWYRERVDVIDAFLDVAGKTPQRLAAANAAGAE LRAFYG  
ELLARRRRTPEGEDLISGLVEAVDAGGVELTEDELVSNLIVLFNASFVTTV  
YMLSNGLPVLLAHPEVAAAALATDPVLTAGAVDEILRLQAPVHLLARAA PR  
DTV LGGVPI PQGQNVLLLVA AANRDP AHFPDPDRFDPWRSGPPSLAFGLG  
LHYCLGAAVSRL EGRALPRLLSRFPRLRIMEQPVYSGSLFLRGIDKLSV  
SPGEGSTRE

>CYP166A4 (2519880226) *Salinispora arenicola* CNY234

MTDAISFELPWARTDKFDPPAVFDALREQRPLARMRYPDGHVGVIVSSYE  
LVREVLGDPRFSHSCAVGHFPVTHQGQVIPTHPQIPGMFIHMDPPEHTRY  
RRLLTGEFTVRRTSRLTGHVGVATEQIEVMRGGH GAPADLVATFARPLVL  
RVLSGLVGLPYGERDRYLHAVTLLHDAEADPAEAAAAYEQAGAYFDEVIE  
RRRRQPEDDLISTLVGGGELTGEELRNIVTLLLFAGYETTESALAVGMFA  
LLHHEDQLARLRADPTKIDAAIEELLRYLTVNQYHTYRTASEDIELHGEV  
INKGDSVTVSLPAANRDPARFACPAELDIDRETSGHVAFGFGI HQCLGQN  
LARVELRAGLSALLRAFPNLRLAVPADEVPLRLQGSVFAVKNLPVCW

>CYP105W2 (2519880559) *Salinispora arenicola* CNY234

MTGYQDRPTGDQPGAPVPSGSTDPGIGAFPLPRRCPPSPPAEYARLRAEH  
PVVRLPMLGGDTAWVVS RHADVRQVLS DPRMSADRRRPGFPKFAPTTEGQ  
RQASFANFRPPLNWLDPPEHAICRRQIVDEF SVRRVRQSRALVERVVDTH  
LDALTAAPGADLVSTFAYPVPSQVICEVLGV PYGEHEFFERRSTLMFRR  
STPADERARCAREIRDFLD MVVTDKEHRPGDDVLSRLLYRQRRAGGVDHE  
AVVSMAFVLLVAGHVTTSNMLALS V LALLTHPARLARLRAE PERFPAAVE  
ELLRYFTVVEAATARTATAEVTIGGV TIAAGEGVVALGQAANRDP RVFEH  
PDEFDPDRDARAH LAFGYGRHICPGQHLARLEMEVALSRLFRRLPGLRLT  
MEVSDLPLKEDSNIFGLYALPVAW

>CYP248A2 (2519880567) *Salinispora arenicola* CNY234

VLADAVTAFDPTAVDVRRDPYPSYHWLLRHDPVHRGAHQVWYVS RFADVR  
AVLGDERFARTGIRRFWTDLVGPGLLSQIVGDIILFQDEPDHGRLRGVVG  
PAFSPSALRRLEPTIEATVNDLLRPARALGAMDVVADLAYPLALRAVLEL

LGLPAGDANAVGRWSRAVGRTLDRGATAEDMRRGHAAIAEFADYVERALA  
ERREDGADLLALMLAAHGSQMSRNEIVSTVVTFIFTGHETVASQLGNGL  
LSLLDHPEQLELMRRQPHLVPQAVEECLRFDPVQSNTRQLAADVELHGR  
RLRRDDVVVVLAGAANRDPGRYDRPDELDIRRDPVPSMSFGAGMRYCLGS  
YLARLQLRTALGAMVALPDLRLACNPNELAYQPRTMFRGLTRLFVAFTPA  
G

>CYP107FS2 (2519880627) *Salinispora arenicola* CNY234

MPVPQGEQNLTTTEVFADPKALFATLGSRQPLHRISLPDGMFAVLVTGNRE  
ARQALSDPRLVRSITAAAPELHKYHPLASDDYALSRHMLFADPPDHGRMR  
KLVSTAFTRRRVEQMRPRIQQITDDLIDVIAAKGEADLVETLALPLPIAV  
ISEMLGVPPFADRSEFERHAEVLTGINASSGFDIAAAGRWFDEYLAELVQ  
QRRREPQDDLISGMLAAQDKGDRLTDVELRSNALLLSAGFETTVNLVAN  
GLLALLRHPEAMAALRSEPNLMTTAVDELLRYDSPVSCVTYHFAQEPVEI  
GGFEIRSGEHVVIAAAAANHDPTVFADPSRLDLRREGSGQILSFSGIHF  
CLGAPLARLEGEIAFGTVLRRLAGRLAVPTDSLWVKASFVLHRLERLPV  
TFTPDRAPNPIDSVHTV

>CYP105CN1 (2519880628) *Salinispora arenicola* CNY234

MAAPAPQATQSTTPHPPSYPLPRECPYRPSAGTARLRDAGPVSTVRLYDG  
RTAWLVTGAAEARALLADSRVSNRADFPNYPVMDERHLSMRATREMAREE  
EGGFAAALFGMDPPEHTRQRLQLLPRFTVRQVAARRPAIQRIVDEHLDAM  
EANGSPADLVSAFATPVPTMVVCTHLGVPPYQDRTRFEPVAVAGLFEPDRAD  
AAMAELTAYLHQLIETKQSEPGDGVIDHLIANHLRPGAIDRAELVAIASA  
ILVAGTVTTSSAIALGTLALLTAPGQYAALVDNPDLPVPGAVNEILRYLSL  
VEQLARVATEDIEIGGKLIRAGDGIIVSFAAGNLDPNVTHPDRLDVALP  
PTNHIAFSHGIIHCIGQNLALLELDIAFRALVSRFPTLRLAVPAEQLPY  
FAGDVPRLACLPTW

>CYP105CP2 (2519880630) *Salinispora arenicola* CNY234

MTKSMPVQDLPAFPIPRECPYRPSAQHVSLRSGGPMKVRLYNGRTAWLV  
TDSAHARAVLSDYRRVSIKPYHGNYPILLNEEFKVVDSGYADVLFGVDPP  
EHTRQRMIMPSFTLRRTAVLRPDIQRIVDDKLDEMRRHGAPGDLVTEFA  
QPVPMSMVSFLLGVFWEDHEEFETPAHKLFVPELAEETTELGAYLERLI  
QKKEQPGGTPGGTGLLDDLIRDHLRAGALSRLDELVHIAMAMLVAGTDTT  
NVISLGTALLDNDPDQWAALRDNPDDELIPGAVEEILRYTSLIEAFARVAV  
SDIELNGAVIKEGEGILISSAGVNFDPALAPDPGRFDIRRPFRPSFSFSH  
GIHRCPGDNLARLELEIAFRSLVTRMPNLRTAKPIDQIPSNNDGTQLRL  
YELPVVW

>CYP245A7 (2519881022) *Salinispora arenicola* CNY234

MPSATLPRFALTGWSRENIVNPYPVYQRYREVASVHRGEPGGDAPDTFYV  
FSYDEVVQVLSSNCFGRGRSLDAAKASVPVPAEQKALRAIVENWLVFMDP  
PRHTELRLSLNRSFSPRIVTELPRPRIARIAQELLSRLGQQVDVDLVESFA  
APLPILVISELLGIPEERRAWLRANALALQEASSSRAGRDVDGYAQAEVA  
AQEFTEYFREQVRLRRGRAGGDLITILANAQERGAPVSLDAIVGTCVHLL  
TAGHETTTNSLAKAVLALREHPAVLDELRGAEGLTTDAVEEFLRYDPPVQ  
AVTRWAHQDITLGGCDIPRGSRVVALLGSANRDPARFSPDVLVRRPAD  
RHLSFGLGIHYCLGATLARAELEIGLQALLDGVPRTLGYGTQHVDYADDLV  
FHGPSRLVLVNLGERCK

>CYP244A4 (2519881026) *Salinispora arenicola* CNY234

MSTTTNTELTEAPETNMPVDPGLFDCMPDLIAARVAPVVRIPYLGRIHAW  
VVCDELVKQALHTPKMGKDIALVPEWMRQPGMLVTAQPDPEYARAMIMS  
DGENHARIRRIHAPVLSRPNTERWGERVADKVEGFLELSQAGSGGSTEV  
NVVTNYTHKIPLAFISEMLGLPPEAEHRLRGITDIMLYSSDYAARREAIG  
GLFGAVEDWVRNPADLRDGVITGLLAASDGPDAAVTEGEVIVWTLGMIIT  
GYETTGSLISTSLYEAIRRPPHERPKTDEDITAWIEETLRVHPPFPHPPTW  
RFPLEDIELGGYLIPKGAPVQVSIAAANRKPGEGADSFDAERRGHGHLSE  
GLGMHYCIGAPLVRLEAQIAVRGFLRRFPQARLSAETAVQWESEWMIRRM  
SVLPAVLS

>CYP211B2 (2519881387) *Salinispora arenicola* CNY234

MDVSEAI AVLISPSGRLDPYPTYEQLRAHG PVSRTTAGL FVV TG YAEADM  
VLRDPRFVVLDDDLRDDVFPHWQDSPA IKS IARSMLRTNPPDHSRIRRLA  
AGAFTPRRVAAMREV VTAQADEL VDEMIRAGRDGARVDFMDMFAYPLPVA  
VICALLGVPAADRSRFRRWAGDLTGILEPEITPEELAGADAGADELRDYF  
TGLIEQRRRAPADDLTALVQAHDADGDRLSGEELLANLVVLLVAGFETT  
TNLLGNGLVVLTRPEAAAAALRDEPD LAPGYVDELLRYDSPVQLTRTRTVR  
ESVSFAGTELPTGSWLLVLLGAANRDPRRFDPARFDPGRAQSQPLSFGA  
GPHYCLGAGLARLEAQVAFPLLLRRLPELALAGRPSRRTRLTLRGYETLP  
ITVGAVTADRGTAGVAPGTP

>CYP208A12 (2519881655) *Salinispora arenicola* CNY234

MTLDTITPRVPLGPRTAALRMLLV MKRDRLGMLTSAAARYGDASRLPVG  
HKALWFFNHPRYAKHVLADNSANYHKGIGLVHARRALGDGLLTSEGDLWR  
KQRKVIQPAFQSRRIAQQAGMIAEEAFALVERLRARAGAGPVELTAELTG  
LTLGVLGRSLLDADLAGFDSIGDSFATVQDQAMFELETNAVPMWIPLPR  
QIRFRARRRKLQAVVDTLVDGRAGNLADRVDVLSRLILSARGEADPRVGR  
ERLRDELVTLLLAGHETTASTLGWTL SLIDRHPGVWERLHAEAVEVLGDR  
LPEYDDLRLRLRYTVMVVEEAMRLFPPVWLLPRRALAPDTIGEYRVPANAD  
VVISPYTLHRHPEFWPNPERFDPERFAPGQAADRPRYAYLPFGAGPRFCV  
GNNLGMMEAVFVIALLCRHLRLTGVPGYRLVPEPMLSLRIRGGLPLVVRP  
VS

>CYP105AB8 (2519881842) *Salinispora arenicola* CNY234

MTETASSRLTDTEFPVQRECPFAEPVEYEQIREQSSIAMVRLTGGGEAWW  
ISGHEQGRAVLADRRFSSDRKANFPFVSTDPAIRKRLHAQPLSLISMDG  
AEHTQARRALIGEFTVRRLAALRPRIQQIVDQCIDEMLTDDQHRADLVKA  
LSLPVPSLVICELLGVPPYADHDFEQEHTATLVRRNTASEVRQHSIDELNA  
YLGALIDRKLASPDDDLGRQIARQHRDGTFRSSMVSLAFLLLVAGHET  
TANMISLGVVGLLQHPEQLAMIKDDPKTPLAIEELLRFFTIVDSVTSRV  
ATEDVRLGDTTINAGDGVVVSGLSADWDPTVFADPDRLDLERGARHHLAF  
GFGPHQCLGQNLARLELQIVFDTLFHRIPTLRLAAPLDKIPFKTDAAIYG  
ARELPVAW

>CYP154M5 (2519882084) *Salinispora arenicola* CNY234

VEQSCPYKLDVTGRDVHAEGEAIRARGPVAQVELPGGVQGWSVTGYQAAR  
QVLADPRFAKDPKKWPAYTSGAIPPWNWPLIGWLLMDNMTTNDGADHQRLR  
KLVSHGFTPRQVERTRPLIVKIVNDLLDGLSSAGPDEVVDLKGRFATPLP  
ARVICDMFGVPEALRASVLRGAQVNVTS S ISGEEAEANVEQWHRELLELV  
EAKREKPEDMASLLIAAKEEDGSTLTQEEVVGTLHLMLGAGSETLMNAL  
SYAVLGMLSNPGQYEMVRNGTSSWDDVIEETLRAQAPVAQLPLRYATEDV  
AVGGAVIKAGDPVLMGFTAIGRDP AVHGETAGDYDITREDKTHLSFGHGV

HFCLGAPLARLELKIALPALFERFPNMTLAVRPDQLEPQGTFIMNGHREL  
PVRLGQPATVLA

>CYP105CT1 (2519882101) *Salinispora arenicola* CNY234

MNSPNHMPADRSLTAPASGCPMALSRGRVGLDVADEISELRDGGRLGRIT  
TAFGQEATLITRYDEVRAQMADSVVFNVAGVPSPPALVDGGFDTESVRRR  
RTVGNLIMLDPPEHTRLRRMVAAWFTTRRVERLRPRVVEIIDAALDEMER  
SGPPVDLVAMFAKTVPITVICELIGVPEELRERYRRRAERAVSASAVSTP  
LDELRLREAGWVSRELIEYHRENPSDDIIGMLLREHGTDSHDDGITDDE  
LVGLANALLIAGHETTTQMLSMGTLALLRHPDQLALLRDDPSIVAGAVEE  
LLRYVGV LHGGFVRVATRDTRLGGHRIHAGELVVPALTAANRDPRLITDG  
DRLDITRPPTSHVAFGHGVHFCIGAPLARMELREAFPALLRRFPGLRLAV  
PDSELEFTQGT TVYSLRGLPVTW

>CYP105CH1 (2519882684) *Salinispora arenicola* CNY234

VSSLPLPTYPKLRDPADPLLPAPAEYLAIQSEKPIAKVLLPSGRPTWLITG  
HALARQVLTEPCVSDRRHPNFYPVPNPDAVVAQVARWTYILLGDDPPL  
HTERRRLLI SEFTVRQAQAMRPRIQQLVDFHLEQLIAAGPGADFSKHFAM  
KVPSAVICEMLGVPFADHDYFQERTALQLRRDVPVAAQKQAIDELLAYFE  
QLIQEKSSHPGDDVLSRLIVSNRETEAFDHEALVALGLLLLVGGHETTAN  
TLTLATATMLERPEIAEQLRDPSLMPSAVEEFLRYFSVAVAVSRIATAD  
LQVGGQLVRAGESMLLVLNTIARDGTVFPEPHRLDIRRNARNHLAFSHGI  
HOCMGONLARVEMQIALD TVLRRLPGLHLVAPFEELPFKYRHLVWGIEEL  
RVAW

>CYP105G5 (2519882869) *Salinispora arenicola* CNY234

LTIIETTETPPADDSLAPLPRQFMQRDDPSKLPPALAAAEQSPVGRSTL  
PDGDPFWMVSGYDEARAVLSDPRFSSDRFRYHPRFKKLSGQLGERLRNDK  
ARAGSFINMDPPEHTRYRKLLTGQFTVRRMRQLTVRIEQIVTEQVDVMLA  
EGNSADLVSAFAVPVPSLMICELLGVRYEDRTEFQRRRAAGLLQTDLPKQ  
AVENLEAQRAFMQRLVTDKRRTPADDMISGLVHHAGAEPPLTDELVGIA  
TLLL FAGLDTTASMLGLGMFMLLQRPEQMAVLRDDPSRIGDAVEELLRYL  
TVVSTGLFRFAKEDVVLGDEHI PAGSTVVVSLMAANRDGRHWPEPETLDV  
TRVRSSHLAFGHGVHQCLGQQ LARIELTVGITELLRRLPNVRLAVPPADV  
PLRNDMITYGVHRLPILWDTF

>CYP107Q4 (2519882870) *Salinispora arenicola* CNY234

MTTTAETS AETIDLFSPEVVADPFGWYARLREETGPTTGTLNIGTMMGGP  
EMWLVTTRYEDVRQVLTDPRFLTNPADSPLEDIRAGVFKRDLFPDLPW  
MANLLNVSDGEDHTRLRKLVS YALTAHRIGKLRPRVEKITADLLDKLAED  
GKDGSPVDLVEEYCYPLPVTVICELVGIDEPRPHWRAGDSMATMNGER  
IPTTLVKCIELARELIAKRAEPQDDLVTALVQAQAEQNRVSDDEIIGI  
LFSLVTAGHQTTTYLIGNSVILLLENPDQLARLKENPSMWPQAVRELQRL  
GPIQFAQPRFPSEDIELGGVTIPRGAPVAPLLLAANTDPRRFPDPNKLI  
DRLAVGSEHGLGFGKGIHRCLGQHLAYQEA E VALQGLFTRFPDLSLAVPR  
EEIPWILRPGFTRTRTLPLKLV

>CYP105J3 (2519883139) *Salinispora arenicola* CNY234

MTDSVAFFPQGRVCPHQPA PGYRPLAVQRPLAQVTLYDGRRVWAVTTRDLA  
RRLLVDPRISSDRNTNPAWPAIVPIVAAA V NDAQQKVLKIATALVGTGPE  
HKAQRKMLIPSF TFRMRNALRPMIQEIVDQQ LDEMIKSGAPTDLIPAFAS

AVPVTVLRYRLMGIPDDDHGIFEKLSHQLLAGPNANEAYDQLMGYMSRLIA  
ERRRNPGEGLVDDLLAQHGANDDADHDELVSTLVVQVAGNHGTTGSMIAL  
GLFALLQHPEQLAELRADPSLMPTAVDELLRFLSVPDVTRLAADDIEVE  
GTIIRKGDGVFFITSLINRDTDVHDAPNSLGWHHSAADHLTFGFGAHQC  
LGQSLARITMEIALGALIDRLPSLRLAVPAEEVPFLPAASLQVIAELPIT  
W

>CYP107EU1 (2519883173) *Salinispora arenicola* CNY234

VTIGQTLPLDVYSPEFTRDPYAIFARLREQAPVCRVTTHRGMSAWMVTRH  
ADVRALLADNRLAKDGNRIGELMPRHSTLTGAATGFPPGLTTNMVNSDPP  
DHTRLRLHLVGREFTGHRVEGLRPRIEEIVDDLLDGVAACGDEADLAETLA  
RRLPIAVIGELLGVPEADRAEFFRWADTLYGGTASPEALGQAYNAIVDYL  
GRLCDAKRDPADDLLTALVQVSADEDRLSREELVSMALLLLVAGHETTS  
KQISNGVLALLLNPEQLKLLKAQPARTAGAVEELLRFEGPSLSASLRFTT  
EPVEVAGVVIPEGEFVLLSLASGNRDPEKFPDPDRDLITRSTQGNLAMGH  
GIHHCVGAALARLELEIVLSRLVARFPQMQLAVEADDLEWLVNSFFRAPL  
HLPVSLRR

>CYP1198B1 (2519883319) *Salinispora arenicola* CNY234

MSGELTDQRTAPGAGGNPLRSLMDHGIRANPYPLFGELREAGPTAVEDGS  
VVLFGHEYEHCSQILRHRDMGSDTSEAPSIKGFVVDDAERAGSSIFFMDQP  
GHGRQKRLVSKSFTPRIVKSFGPQIAHIVDGLFEDFRDRGELDVVTDLAY  
PVSIGIICDLFGIPDDERDMLKEWSDDLALSTELPTLGAAIGVLNVFTRD  
EINRFGSVMAAHAYFADLIHRRRNKPGDDLVSLLATESNGERLTRFEV  
TSVLATLFVAAHESTTNLISGGILALLRNQDQMAVLRENPGIITNVVDES  
LRYDPPVHLAARMARARTTIGGYDLDPGTIVVVLMAAGNRDPRAYESPDV  
FDVNRKIRNVSLAFGAGAHFCIGSGLAKLEAEIAISAFQRLKHPEVDES  
SLEYRRHIVVRGLEHMKVSFQP

>CYP163B1 (2540885395) *Salinispora tropica* CNT250

VTAADTGRVSGESQTPAHTVDLADPATFANHDLTGFWQQLRDEEPIHWN  
PPTAGRRGFVVVSRYTDILDVYRDDVTFTSERGNVLVTLLAGGDAGAGRM  
LAVTDGPRHAELRKLLLRALGPRVLAPVCAAVRTNTRQMIREAVTKGEC  
FASDIASRIPMMTISNLLGVDPADRAFLLSLTKTALSADDESISETESAM  
ARNEILLYFQDLMEFRRDHPGEDVVSMLVNSSIDGAPLSDDDIDLNCYSL  
IIGGDETSRLTMIDSVNTLAAHPQQWRRLKDGQCEIDKAVDEVLRWASPS  
MHFGRVAARDTILHGVRIRADDIVTLWHASGNRDERVFHRPEVFDLGRTP  
NRHLSFGHGPHYICISYLAKVEISELLIALRDLTSGFETTGEFQIRSNL  
LTGFATMPVRFPVDRAGLARDALDG

>CYP154M1 (2540885756) *Salinispora tropica* CNT250

MRRRCPVVIDPAGTDIHAEGARIRANGSVSQVELPGGVLAWSVTGQQVAR  
KVLSDQRFSKDPKHWTDYLEGRIGQDFPLIGWVMDNLTAYGSDHSRL  
RKPCANAFTPRRVEALRPAVERAAVELLGELATVSPTESVDLKARYAHL  
PSRVICDLFGVPEEDREEMLRGGEVNVDTRVSAEEAAAANVERWHQQMLDF  
IEEKRRNPGPDLTSDLIAAQQAEGSRLTDSEMVGTLHIMLATGTEPVKNL  
IGNAVFALLTHPEQLDLVRSGRAGWDDVIQETLRMQAPVAHLPPFRFAVED  
VDIDGVTIRRGDPLLVNFAAIGRDPDVHGDAAEFDI TRADKEHLSFGHG  
VYRCIGQPLALREAEIALRMLFQRFPNLVLAVPPEEVPQPTFIMNGLDT  
LPVLLKGRA

>CYP208A4 (2540885785) *Salinispora tropica* CNT250

VTVAAAGRTFSGPTGAALLRSLWQLGQDRLGLMTSAARYGDAVRLGVGSR  
SLYFFNHPDHAKHVLADNSGNYTKGLGLVHARRALGDGLLTSEGELWREQ  
RRVIQPVFQAKRVAGQAHAVAAEEADRLIARLRARRGRGPVNLTDFTALT  
LGVLRGRTLLDANLDAFTTVGAAFEEMQNQAMFEMASMSMVMWVPLPQQL  
RFRRARRELERIVGRLVADRTARGEETGADDALSRLIASTRDEPDGVAR  
RRMRDELVTLLLAGHETTASTLGWTFHLINQDPRVRVRLREEAIDVLGGR  
LPEYADLARLTYTKMVVSEAMRLYPPVWMLSRLARDADVVDGYVPV  
PARADVLICPYTLHRHPAFWPEPERFDPERFDPEVTTDRPRYAYV  
PFGAGPRFCVGNHLGLMEAVFVAMVSREFDLVAPVGPVVAEPMLSLRVRGGLSMTVEP  
VS

>CYP125A15 (2540885864) *Salinispora tropica* CNT250

MTEPRIPVGFDFTDPAVLERRVPREEFAELRRTAPVWWNVQPRGSAGFDD  
DGYWVVTRYADVMAVSRSDDTYSTRENTAIARFQPGTTRADLEMQRVIML  
NVDPPPEHTKLRAIVSRGFTPRAINALRGSLAERAERIVRDAAVRGTGDFV  
ADVACELPLQAI AELIGVPQHRRKVFWDWSNQLIGYDDPAYGVDPLTAAA  
ELLAYAMEMANERQLNPSDDLVTKL VNAQIDGHELT TDEF GFFVMLLAVA  
GNETTRNAITHGMLAFLEHPEQWELFKAERPRSAVEEII RWATPVNVFQR  
TALVDTTLGGQAI SAGQRVALFYGSANFDES VFEEPERFDITRSPNPHLG  
FGGSGAHFCLGANLARLEIELIFHSIADHMPDIRKVAEPRRLRSGWINGI  
REMPVRYR

>CYP211C1 (2540885997) *Salinispora tropica* CNT250

VLDVEGLLTRLYSEQGRQDPYPVYAGLHAQGAIAALAPRPEGQRVA AVAV  
GYDLVGAVLRDPEWSKQPPPGWMEQEILRTLQSSMMFINPPDHGRMRKVF  
AGTFTPRRLGTLEPVINRVADELDRMADAGPGEVDFVAEFAYPLPARVM  
AEFIGIPATELAWYRDRVDRIDAFLDVAGKTPERLAAAANAAAAELRVFYA  
DLLARRRRTPGEDLISGLVEAVDAGGVQLTEDELINNLIVLFNASFVTTV  
YMLSNGLPVLLHEHPEVAAAALADDPELTAGAIDEILRLQTPVHLLARAAPR  
DTVLGGVPI PQGQNVLLLLIAAANRDP AHFPDPDRFDPRRPGPPSLAFGLG  
LHYCLGAAVSRLEGRALPRLLSRFPRLRIMEQPVYSGSLFLRGIDKLSV  
SPGGRMHP

>CYP107AY1 (2540886619) *Salinispora tropica* CNT250

MRAELAPIPRSGARLGQEYDQLRNAGDVHQVLLPDSSLAWLVTNPKLVSR  
ALTDPRALNRRHSRGSWSGFALPPALDANLLNLDAPDHTRLRRLVGP  
PAFSPQRVSALRPRI RRTAEHL LDTLVATSGPVDLVTGYCTPLSVQVIADLMG  
VPEAGRADLR TWTDTMLTSYPPDRDAIRQAVVELHGYVVDLIDTKRQQPG  
DDL LSALVTIEQDGDRLTRDELTS LAFLILFAGYENTANLIAS TVLRLLD  
HGGLRGVQLPEAIEETLRLEPPAPAAVRRFPTEEMTIGGATIPAGDIVLL  
SIAAATRGTAGNAARLAFGNPHFCLGAALARVEAEEALTVLARRLPD  
LA LALPVAQVRWRPTFRTHGPAELLVTW

>CYP107AW1 (2540886648) *Salinispora tropica* CNT250

MESVTSTSA PPPVPYIADPYPALARIRANGPVSI LHSDEGIPMWVIARYR  
NVRAALADPRFGQDARRAQT LADNRVAGVT LGGDVIHMLNSDPPDHTRLR  
HLVQGAFTARRVAAMRPLVERITTSLLDGVGGRQTVDLVQDFAFPLPMLV  
ICELLGFPAEERDAYRSWSTAILTHNDDPAAAFATALRDMTDYIEVQLRHR  
RARPGEDLLTELLAARDAGQLT DDEIVGMVFLLLIGGHETT VNLGATL  
ALVRNPDQHRWLLANPHALSEAIDEFLRYESPVAMATLRFTTAPVTVDDV  
VIPAGELVLVSLGGANRDPDRFPDADRLILD RRDTGH LAFGHGLHRCLGA  
FLGKLEGEVALRALLGRYPGLTLAAEV RQLRWRDTIMLRGLES LPVSLHG

>CYP211B1 (2540887114) *Salinispora tropica* CNT250

MDASEAVALLMSPLGRIDPYPTYERLRAHGPPVQTAAGFFVVTGYTEADT  
VLRNARLAFEVMDDELRDDVFPHWQDSPAMKSIARSMIRANPPNHGRMRR  
LAAGAFTPRRIAALREVVTQADELADEMIRAGRDGAPVDFMGSFAYPLP  
VAVICALLGVPAADWARFRGWASDLTAVLEPEITPQELTVADAGASELRD  
YFTELIAQRRRAPADDLTALVQTHDADGDRLSGEELLANLVLLLVAGFE  
TTTNLLGNGLVVLLAHPDSATALRGQPELAPGYVDELLRYDSPVQLTTRT  
VRESVLLAGVELPAGSWVLVLLGAANRDPERFTDPTRFDPGRAQSPPLSF  
GAGAHYCLGAGLARLEAQVAFPLLLRRLPELALAGEPTRRNRLTLRGYET  
LPVTVSAIAADHGTPAGVARGTP

>CYP1005A1 (2540887485) *Salinispora tropica* CNT250

VSAVLFRSWTKTAGTHWPAITRVADQQGTEHLVVVQHALVRQVLTQDQTY  
RPDNALDAVTPIPVAALRVLAGHRFRLPPTLANNGGVSHPAIRALVADAL  
HPAKVAAQRPWLTGLVAERVAAIRRTLDSSGGSTDLHAELNADLPLLVLAR  
LVELPDAPVSAVKQFARAALFVWAPLDADRQLALADEVGRFHQVLRFA  
DTGGGLAAALRATGHPPDVLVGALFFLLVAGQETTSQFLTLLHRLADEP  
TVRAALRADSVSVADVVEEGLRLEPPIVTVRRVAAVDSTLGGSTVAAGTS  
VLLWLARAGRDPAVVPAPDEFPRPGQGRSRRHLAFGAGAHRCCLGDQLARME  
AAVVVEQVTPLLDGVTVVRPPWYPDNLTFRMPDAFVVR

>CYP107AX1 (2540888392) *Salinispora tropica* CNT250

MTSRPTAVFDQCLLRDPHSRYNALRDQAPVHHVLTDPDGAPAWLVTRYNDV  
RAAFTDPRLSVDKRFSGTDGEHGSSLPPELDAHLLNRDPPDHTRLRRLAA  
AACTPRRVADLHPAVERIVSTLLDGLAGHDRAELIGSLASPLPLQVMHEL  
LGLPTQANIDFRTWTNTLLSADANQPAQSRAAMANMRRFLIEQLAHKRAQ  
PGDDLTLGLLAAREDDDLRLTDELVAMVFLLMFAGYDNTAALIGTVTHAL  
LTNAELHEAVRGGSLALDELIDEVLRWNPAFFLAVRRFAREPITIAGQTI  
PAGDRIWLCLASANRDPAQFTQPDDELGIIGLRRSHLSFGHGIHYCLGAPL  
ARLQTTIAVTSLNRFPEMRLAVPAHDIRWRESFRLRGLIALPVYL

>CYP1004B1 (2540888686) *Salinispora tropica* CNT250

MTTSALAPRFDALDPNVVEDPYPEYARLRAAGPLCRLGPGSWGVTREFADV  
TNLQHDPRLGSEFPAGYHEISVGDPASAFFQVRMLYRDPPDHIRLRLRM  
SGAFTPAVVRRLRSHIEDLVDELLAPALAAGRMDLVPDELAYPLPVRVVC  
LMGIPPESTEDVRHHATNIGRAFTAVVPEQARTEADEAVSWLREHLGALL  
EQRRSHRGDDLRLSRLDAEESGDNLSADEIVDNTVFSFFAGFETTVHMIT  
TGTAALLAHPDQLARLRADPSLVTTAVDEFWRWDAPIQGTARYVREPIEI  
GGRTIRRGRVLVLMIGSANHDERRFAQPDRLDVGRQDNPHVAFGGGAHLC  
LGAFLARMEGAVVFDRLARLAVLEPDGPTVREPNTPFRAVASVPVRIGDR

>CYP1004A1 (2540888690) *Salinispora tropica* CNT250

MRANTARPHLSAAFLATKDDPYPAYAELRARGPLTRAELGQWLVTGHGAV  
SALLRDGRLESRMPAEYTRLTLGDSPGVDFLHRIVLTRTPPEHTRLRRI  
GRALGTPVVRRLHDRIAAATDALLEPALDRGRLDVVTTELAVPLPVGVVCD  
LIGIPTGDRPAVLTRVTALAKVFDAANLSPADLADINTALPWLHDYFGDL  
LAVRRAGSGGPTLTEMWEEASDRLAVADFVDNMLFLFHAGFETTMGLV  
SNGVAALLNNPEQLGRRLRADPALVPSAVEEFLRYDAPIQNVIRVARKPVE  
VAGQKIRAGRTVLLLLGAANRDEEVFADAERLDVGRDPNPHLGFGGGLHH  
CVGTALARLMVVVFERLVDRVTVLGPAAPAVRRRHASLSYDHLPLAVA

AR

>CYP125G1 (2540888729) *Salinispora tropica* CNT250

MSTEVVSTGNRADIAPATYAAGVPYAEFARLRRDKPVSWVPEAALWRRS  
GEGRILSQGPGFWAVTTHEGVVAASRQPEVFSSGRQGAFLADPRTTADLE  
QARQLLVNMDAPQHARVRKLVTAFTFPRAIRALGDSVTAHARNLVERAVR  
QEECDVVADLAAELPLLVLADLLGLPREDRHLLYQWSNNLVGFDDPEYGG  
GDVEAYRKTFEAFQYALSVAGERRRAPREDLMTLLATSEVDGRRLTDRE  
FCNFWLLL VVAGNETTRHLITGSVLALVDNPMQRERLVADDTLLPSAVDE  
LLRWVSPIMQFRRTAIVDTCLCGTPIAAGDKVVLWYTSANRDAAVFEAPD  
ELRLHRNPNPHLSFGMGPHFCLGAHLARLEARTMLRELAPHLSRFRLTGP  
VVRLESNFVNGVKSLPGSFTGQ

>CYP113E1 (2540889078) *Salinispora tropica* CNT250

MMATVPRLTFADGGVSVLPWFRQMRDDQPVWYDQGTGSWNVFRYADIAQI  
LTDPATFSSDPGRMTPELVEEAEGSLVAVDPPRHGRRLRALISTAFTPRL  
VEQLAPRVRSIAERLLDRTFVDRGPEGEFDAIGDVA YLLPVYVIGELLGL  
PETDREYLVRTADEFYAISADDPFDGTYMASMQSTLDGLGTYMLDQAERR  
RARPGDDLMSALAHAEIDGEQLNDREIRNFVAVLLLTAGHITTTALLGNTL  
LALGERRDVMLRWRHGQVDTADVLEEVLRHRTPFTEVYRFTTTEVTIGNQ  
VVPGDQLLRLWIASGNRDERQFADPDFTFVLGRDSRHLGFGGLGIHYCLGAS  
LARMESVVLVLAERTTTLAPAVQRLSYDAPGIFCLRSLPVS YRRS

>CYP105AB2 (2540889202) *Salinispora tropica* CNT250

MTETASIAATTRTASQGLTDAEFFPVQRGCPFTTPTTEYEQIREESSIAKVRL  
KNGGEAWWIAGHELGRSVLADRRFSSDRRRDNFPFVSTDPETRAQLQSQP  
TSM LGMDGAEHAQTRRALMGFTVRRMAGLRPRIQQIVDQHIDEMLTTPQ  
RSVDLVEALS LVPVSLVICELLGVADHDFQGLTGPLL RHTTPPEVRL  
RIQEELNTYLGLTIDHKLTDPTDDLLSRQIAKHRDNGTFDRASMVSLAFL  
LLVAGHETTANMISLGVVGLLQHPDQLV I IKDDPDKTPLAVEELLRYFTI  
ADSVTARVATEDVQLGDTTINAGDGVVISGLAADRDPTVFAEPDRDLER  
GARHHVAFGFGPHQCIGQTLARMELRIVFDTL FHR IPTLR LAAPLDDIPF  
KSDAFVYGIEELPVAW

>CYP107E3 (2540889756) *Salinispora tropica* CNT250

VTIDQEIRKYPFCESPGIGIDPTYGLLRSTEPLARVQLPYGEVSWLATRY  
EDVKTVLTDPRFSRAAAQGDQPR TREEMTYEGII GLDPPDHTRLRKLKAG  
KALTARRVN AIRADAQRIANEYVDEMI AKGSPGDLVELFALPYPVTVICE  
LLGVPFEDRAQFRIWTEGLTSTSEQLMVYAEQLFGYMGKLV AQRRREPTD  
DLLGALVKARDEGDRLTEQELLSIAGVGLLLTG VETVSTH I PNFVYALLT  
HPELMAQLRADRS LVPAAVEELLRMIPLNPAAMFP RYAVEDVTLSGITVR  
AGEPVLVSLPGANRDPEVFENPETFDFTREQNPHVAFGHGPHHCLGAQLA  
RMELQVALHTVLD RFPDLSLADGDEGVSWKSGLLVRGPSRLLVAW

>CYP211B11 (2571081250) *Salinispora pacifica* CNR510

MDASEAVALLMSPPGR LDPYPTYERLRAHGPPVSTAAGFFVVTGYTEADT  
VLRNPRFEVMDDEERDGVFPHWQDSPAMISISRSMIRANPPDH SRMRRLA  
AGVFTPRRVAALREVVAQAADGLVDEMIRAGRGGAAVDFMGSFAYPLPVT  
VICALLGVPTADWARFRHWASDLTG VLEPEITPQELAIADAGASELRDYF  
TELIAQRRRAPADDLTALVQAHDADGDRLSGEELLANLVLLLVAGFETT  
TNLLGNGLVLLTHPDSATALRGQPELAPGYVEEFLRYDSPVQLTSRTVR  
ESVSLAGVELPAGSWLLVLLGAANRDPARFTD PARFDPRAQSPPLSFGA



GAHYCLGAGLARLEAQVAFPLLLRRLPELALAGEPTRRHRLTLRGYETLP  
VTVGAVPADPGTPAGVALGTP

>CYP125A65 (2571081662) *Salinispora pacifica* CNR510

MTEPRIPVGFDFTDPAVLERRVPREEFAELRRTAPVWWNVQPRGSAGFDD  
DGYWVVTRYADVMAVSRDSEYSTRENTAIARFQPGTTQADREMQRVIMI  
NVDPPPEHTKLRAIVSRGFTPRAINALRGSLAERAERIVRDAAVRGTGDFV  
TDVACELPLQAIAELIGVPQHHRKVFWDWSNQLIGYDDPAYGVDPMAAAA  
ELLAYAMEMANERQNRPSDDLVTKLVNAQIDGHELTDEFGFFVMLLAVA  
GNETTRNAITHGMLAFLEHPDQWELFKAERPRSAVEEIIRWATPVNVFQR  
TALVDTTLGGQAITAGQRVALFYGSANFDES VFEEPERFDITRSPNPHLG  
FGGSGVHFCLGANLARLEIELIFNSIADHMPDIRKVADPQRLRSGWINGI  
REMPVRYR

>CYP107AW7 (2571081928) *Salinispora pacifica* CNR510

VETVTGTSTPPPVPIADPYPTLARIRANGPVSIHLSDEGIPMWVIARYR  
DVRAALADPRFGQDARRAQALADNRVAGVTLGGDIVHMLNSDPPDHTRLR  
RHHVQGAFTARRVAAMRPLVERITTSLLDGLTGRTTVDLVQDFAFPLPMLV  
ICELLGFPAEERNAYRSWSTAILTHDDDPAAAFATALREMTDYIAVQLRIR  
QTRPGDDILTELLAARDAGQLTDEEIIIGMVFLLLIGGHETTIVNLLGTATL  
ALMRNPDQHRWLLANQHALPEAIDEFLRYESPVAMATLRFTTTPVAVDDV  
VIPAGELVLVSLGGANRDPDRFPDADRLILDRRDTGHLLAFGHGLHRCCLGA  
FLGKLEGEVALGALLRRHPRLLALAAEVRQLRWRDTIMLRGLESPLVSLHG

>CYP107AX4 (2571081943) *Salinispora pacifica* CNR510

MTSQPAPVFDQLLLRDPHRRYNALRDEAPVHHIRTPDGAPAWLVTRYDDV  
RAAFIDPRLSVDKRLSSTDGEHGSSLPELDAHLLNRDPPDHTRLRLRLAA  
AAFTPRRVADLRPAVERIVSTLLDGLVGHDQAELIGSLASPLPLQVMQEL  
LGLPTQTSVDFFRRWTNTLLSADANQPAQSRSAMANMRRFLVEQLAHKRAR  
PGDDLLTGLLAAREDDRLTDDELVAMLFLLMFAGYDNTAALIGNVVHAL  
LTNTELPAAVRTGSLALDELVDGVLRWNPSPFLAVRRFAREPIITAGQTI  
PAGDRIWLCLASANRDPAQFTAPDTLGTTGMRRPHLSFGHGIHYCLGAPL  
ARLQTTVAVTILLDRFPGIRMAVPAHDIRWRESFRLRGLVALPVFL

>CYP1005A6 (2571083609) *Salinispora pacifica* CNR510

VSAVLFRSWTKTAGTHWPAVTRVADQQGTEHLVVTEHALVRQVLTDQVTY  
RPDNALDAVTPIPVAALRVLAGHRFRLPPTLANNGGVSHPAIRALVADAL  
HPAKVAAQRPWLTELVAERVAAIRATLDSGGSADLHAELSADLPLLVLAR  
LVELPDAPVSAVKQFARAALFLWAPLDADRQLALADEVGRFHHQVLREFA  
DTGGGLAAALRATGHPPDVLVGALFFLLVAGQETTSQFLTLLHLRLAGEP  
TVRAALRDGSVSVPNVVEEGLRLEPPIVTVRRVAAVDSTLGGTAVPAGTS  
VLLWLARAGRDPPIVSAPDEFPRPGQGSRRHLAFGAGAHRCCLGDQLARME  
AAVVVEQVSPLLDGVTVVRAPWYPDNLTFRMPDAFVIRRGPAAGAAER

>CYP107AY9 (2571083969) *Salinispora pacifica* CNR510

MSQDQPTRAELAPIPRSGARIGPEYDQLRKTDGVHQVLLPDTSMWLVT  
PDLVSRALADPRIALNRKHSRGGWSGFALPPALDANLLNLDPDHTRLRR  
LVGPAFSPQRVAALRPRIQRTAEELAETMVATGSPVDLVTGYCTPLSVQV  
IADLLGVPDAGRDTLRAWTDMLTSYPPDRDAIRQAVVELHGYVNLIEA  
KQQRPGDDLSSALVATEQEGDRLTRDELTSALFLILFAGYENTANLIAST  
VLRLLDHGSRLRGVRVSEAIEETLRLEPPAPAAIRRFPTTEMTIGGATIPA  
GDTVLLSIAAATRGADGNPARLAFNGNPHYCLGAALARVEAEEAITVLAR

RLPGLALAVPGAPVRWRPTFRTHGPAELLVAW

>CYP161N4 (2571084114) *Salinispora pacifica* CNR510

VNTVAQLPFTQTHVLDVAPALRLLQSRGKVHRVRTPEGVPAWLVTGHAEV  
QQLDDDDRLSRSDPGGRDGGTALLNKLLGPLADDHPRLRSLLEPQFTPER  
LEPLRAVVEKLTEQHLDELATRTFPVDLRPALAMSLPILVLCEWLGVPAE  
DKGRFSVWTQDAAGVQDPERSQRLAELFGYCRQLVAAKRQDPGDDVISR  
LIATAGIGDTEVVALTALLFGGYETTVARIGTGVLNLTNPQWAAVRA  
DPALVPSTVDELLRRSMPNPHNGGMPRFVAVTGFEIDGAAIRAGDLVLLNI  
IAANHDETAFPDPDRDITRPTAGSLAFGYGRHSCVGAFLARMVLRVALS  
RLITRFPDLRLAVGVDELKLRHETLVGGGLVELPVTWGPR

>CYP2054A3 (2571084119) *Salinispora pacifica* CNR510

MSISADSEQVQGRPFDPYGAHRDDPYTFLAGLGVFYAPLLDAWCVTRRED  
MVAVLRDDRSFSARDHNPRPAVALPDDVNQMFRWTWRGAGAVAVGSLDPPA  
HAKIRDVLNIGFTPARVRAFEPTMRAVAADLADRIGDAPEFDFIADFAPV  
FALEVIGRRLGVPDDYLDRCRTWSEQRIELMMAQGDADHDRLREFARGLM  
EFGEFARSLVRDRVADPRDDLISELLHDGKAGRTLTADEVAVQIPTLIFA  
GHMTCAEALGTIFYQQLRSPGGWARVVDRTIPVGDVVEEGLRFDSPLAGM  
YRTATRDVTVGGIRLTAGSRLLLLYGAAGRDSRAHACPAAFRPGDGSSGH  
LAFGHGHIHFCLGAGFARAELRVAVEVLAARMPDLGLAPGRPPRFRPVFPL  
RALTELVRVTRSGGSGP

>CYP107FH3 (2571084125) *Salinispora pacifica* CNR510

VPIELDEAFVQDPYAVYEKLRAEGPAHRVRMPPGVPLIGGLPVWLITGYD  
AVRAALADSRLSTDHLRIDGLFAQKDPDRSHRGGFSSALASHMMHTDPPD  
HTRLRKLVSKAFTTRAIEALRPRIQQTDELTAELAGHDTVLLDAFAFP  
LPIRVICLLLGVPAEQENFRSWSRALVSGHSPEAAATAATEVAAYLGDL  
VERKRHATTDVLTALVAAHDVDDRLTHTELVSTAYLLFIAGFETTLNAL  
GNGTLHLMLHRDQWTALRADRALLDNAVEEFLRLESPLKHATFRCATESL  
RIGDAEIAAGDFVLLAIASANRDPRRFPDPHTLDVRRPAAGHLAFGHGHI  
HCLGAPLARVEVRMAFDALLDAFPDMRLATDPAGLRWRNSTIIRGLDLSL  
VHLNN

>CYP124M3 (2571084527) *Salinispora pacifica* CNR510

MTVPIELDAVDLSNDNDFWTKPLEYRHAVFNALRAQPLPHFASPEFGSAP  
RGRGYYALTRMDDVLAVSRNPSVFI SGKGNVAMEVPAEFLDQSLITMDNP  
RHARLRRIVSRGFTMKAVTALMDNASQMAKQIVDEVVERGECDVVDISA  
KLPLGII CNMMGIPDSQQQVFVEQTNVMLGVQDPEYVGEQNDAMLAMSV  
SQELADLMHELATLRAKNPTDDLISKLLSAEVNGEALTPSELAHFFILLT  
GAGTETTRNAISWGIQLLTQSPEQREAWLSIDIGVTPTAVEEIVRWSSPV  
ISQRRTVAEDAEPVKLAGQLLGPGDKVLMFYGAANRDPNYFVHPEGFDVR  
RSPNPHVGYGGPGPHFCLGAHLARLEISVMFRELLTRIPDIHATGEPARL  
KSPLINGIKRLPVAFTPGAR

>CYP208A22 (2571084548) *Salinispora pacifica* CNR510

MTVIADRGGRIPPGPPVTAGLRLLLLALGRDRLGMMTSAAA EYGDVARLPV  
GPKKLYFFNHPDHAKHVLADNHANYQKGIGLVHARRALGDGLLTSEGELW  
RKQRRVIQPAFQNRRLAQYAGAVGQEATRLVARLATRVDPVPVLDVDEMT  
RLTLGVLGRTLDDAELTGFGHVGESFAAVQDQAMFELETNTVPTWIPLR  
RQRRFRRARQHLQEVVDVLA AERGQAVEGRDDVLSRLILSTRAEADPQLG

RERLRDELVTLLLAGHETTASTLGWSLHLLDQHPELRERVRHEARTVLGD  
RVPAYEDLHQLRYTAMVVEEAIRLYPPVWILTRKARAEDEIGGYRVPAGA  
DILICPYTLHRHPRFWAEPPERFDPERFDPSTTDRPRYAYIPFGAGPRFC  
VGNNLGMLEATLVLAVLLRDLRLLEGLPGRAVVPEPMLSLRVRGGLPMTVR  
RVD

>CYP105AB28 (2571085529) *Salinispora pacifica* CNR510

MTETASTTTPGISSTTTSGPASGEVTDAEFFLERGCPFFSTPTEYEQIREH  
SPLAKVRLTTGREAWWIAGHELGRAVLADRRFSSDRRRDNFFVSTDPE  
RKQLQDQPTSMIGMDGAEHAQARRALMGEFTVRRMAGLRPRIQQIVDQHI  
DEMLSSDQRAADLVEALSLPVPSLVICELLGVYPYADHDFQARSGPLIRH  
TTPTEVRLRIQKELNTYLALIDRKVADPTDDLLSRQIAKHHAAGTFDRT  
SLVSMAFLLLIAGHETTANMISLGVVGLLQHPDQLAMIKEDPEKTPPAVE  
ELLRYFTIADTVTARVATEDVQLGGTTINAGDGVVISGLAADHDPTVFTD  
PDRDLERGARHHVAFGFGPHQCIGQTLARMELQIVFDTLFRRIPTLRLA  
APLDDIPFKSDAFVYGAERLPVAW

>CYP107E37 (2571085737) *Salinispora pacifica* CNR510

VTIDQEIREYPPFRESRGIGIDPAYELLRRTEPLARVQLPYGEVSWLVTRY  
EDVKTVLTDPRFSRAAAQGKDQPRTRAEMTYEGIIGLDPPDHTRLRLLAG  
KALTARRVNARADAQRIANEYVDEMIAKGSPGDLVELFALPYPTVICE  
LLGVPFEDRAQFRIWTEGLTSTSEQLMVYAEQLFDYMGKLVAQRRAEPTD  
DLLGALVKARDEGDRLTEQELLSIAGVGLLLTGVEVTVSTHIPPVYALLT  
HPELMAQLRADRSVLPAAVEELLRMIPLNPAAMFFPRYAVEDVTLSGITVR  
AGQPVLVSLPGANRDPEVFENPETFDFTREQNPVHAFGHGPHHCLGAQLA  
RMELQVALHTVLDRFPDLRLADGDEGVSWKSGLLVRGPSRLLVGW

>CYP208A12 (2515494030) *Salinispora arenicola* CNT800

MTLDTITPRVPLGPRTAALRMLLVMKRDRLGMLTSAAARYGDASRLPVG  
HKALWFFNHPRYAKHVADNSANYHKGIGLVHARRALGDGLLTSEGDLWR  
KQRKVIQPAFQSRRIAQQAGMIAEEAFALVERLRARAGAGPVELTAEITG  
LTLGVLGRSLLDADLAGFDSIGDSFATVQDQAMFELETINAVPMWIPLP  
QIRFRARRRKLQAVVDTLVDGRAGNLADRVDVLSRLILSARGEADPRVGR  
ERLRDELVTLLLAGHETTASTLGWTLSLIDRHPGVWERLHAEAVEVLGDR  
LPEYDDLRLRLRYTVMVVEEAMRLFPPVWLLPRRALAPDTIGEYRVPANAD  
VVISPYTLHRHPEFWNPFRFDPERFAPGQAADRPRYAYLPFGAGPRFCV  
GNNLGMMEAVFVIALLCRHLRLTGVPGHRLVPEPMLSLRIRGGLPLVVRP  
VS

>CYP125A41 (2515494362) *Salinispora arenicola* CNT800

MTEPRIPAGFDFTDPEVLAHVRVPREEFAELRRTPVWVWNAQPRGSAGFDD  
DGYWVVTRYADVMTVSRSDTYSTRENTAIARLRPDTTREDIEMQRVIML  
NVDPPPEHTKLRAIVSRGFTPRAINALRGSLAERAHIVRDAAVRGVGDV  
TDVACELPLQAI AELIGVPQHRRKVFWDWSNQLIGYDDPAYGTDPLTASA  
ELLAYAMEMAEERQSPSDDLVTKLVAQIDGHLTTDEFGGFFVMLLAVA  
GNETTRNAITHGMVAFLDNPEQWELFKAERPKSAVEEIIRWATPVNVFQR  
TALVDTVLGGQAI SAGQRVALFYGSANFDEAVFEDPERFDITRSPNPHLG  
FGGSGAHFCLGANLARLEIELIFNSIADHLPDIRKVAAPQRLRSGWINGI  
RQMPVRYR

>CYP105J3 (2515494516) *Salinispora arenicola* CNT800

MTDSVAFPQGRVCPHQAPAGYRPLAVQRPLAQVTLYDGRRVWAVTTRDLA  
RRLLVDPRISSDRTNPAWPAIVPIVAAVNDAAQQKVLKIATALVGTGPE  
HKAQRKMLIPSFTRRMNALRPMIQEIVDQQQLEMIKSGAPTDLIPAFAS  
AVPVTVLYRLMGIPDDDHGIFEKLSHQLLAGPNANEAYDQLMGYMSRLIA  
ERRRNPGEVGLDDLLAQHGANDDADHDELVSTLVVQVAGNHGTTGSMIAL  
GLFALLQHPEQLAELRADPSLMPTAVDELLRFLSVPAVTRLAADDIEVE  
GTIIRKGDGVFFITSLINRDTDVHDAPNSLGWHHASAADHLTFGFGAHQC  
LGQSLARITMEIALGALIDRLPSRLRLAVPAEEVPFLPAASLQVIAELPIT  
W

>CYP1005A1 (2515494559) *Salinispora arenicola* CNT800

VSAVLFRSWTKTAGTRWPDVTRVADQSGTEHLVVTRHALVRQVLTDAQTY  
RPDNAMEAVTPIPVAAALRVLAGHRFRLPPTLANNGGVSHPAIRALVADAL  
HPTKVAAQRPWLTGLVADRVASIRTTLDSGGPVDLYADLTADLPLLVLAR  
LVELPDAPVNAVKKQFARAALFWAPLDADRQLALADEVGRFHQVLRIFA  
DTGGGLAAALRATGHSPDVLVGALFFLLVAGQETTSQFLTLLHRLSGEP  
TIRAALRAGSISVADVVEEGLRLEPPIVTVRRVAAVDSTLGGTTVAAGTS  
VLLWLRAGRDPVAVAAPDEFPRPGQGRSRRHLAFGAGAHRCCLGDQLARME  
AAVVVEQATPLLDGVTIVRPPWYPDNLTFRMPDAFVVR

>CYP211B2 (2515494885) *Salinispora arenicola* CNT800

MDVSEAIAVLISPSGRLDPYPTYEQLRAHGFPVSQTTAGLFVVTGYAEADM  
VLRDPRFVVLDDDLRDDVFPHWQDSPAIKSIARSMRLTNPPDHSRIRRLA  
AGAFTPRRVAAMREVVTQADELVDDEMIRAGRDGARVDFMDMFAYPLPVA  
VICALLGVPAADRSRFRRWAGDLTGILEPEITPEELAGADAGADELRDYF  
TGLIEQRRRAPADDLTALVQAHDADGDRLSGEELLANLVVLLVAGFETT  
TNLLGNGLVVLLTRPEAAAAALRDEPDLPAGYVDELLRYDSPVQLTTRTVR  
ESVSFAGTELPAGSWLLVLLGAANRDPRRFPDPARFDPGRAQSQPLSFGA  
GPHYCLGAGLARLEAQVAFPLLLRRLPELALAGRPSRRTRLTLRGYETLP  
ITVGAVTADRGTAGVAPGTP

>CYP107AY2 (2515495611) *Salinispora arenicola* CNT800

MTAEPTPIPRSGARLGQEYDQLRKTDGDVHQVLLPDASLAWLVNPEVAAR  
ALADPRLALNRRNSRGGWSGFALPPALDANLLNLDAPDHTRLRLRVGPAF  
SPQORVAALRPGIRRAAEHLDDTLVATSGPTDLVTGYCNPLSVQVIADLMG  
VPEAGRTNLRAWTDMLTSYPPDRDAIRRAVTELGHYVVDLIDIKQQQPG  
DDLALSALVTIEQDGDRLSRDELTSALFLILFAGYENTANLIASAVLWLLD  
HGGLNVVPSSEAEIGTLRHEPPAPVAIRRFPTEDTIIGDVTIPAGDTVLL  
SVAAATRGAAGNAARLAFGNPHYCLGAALARVEAEEALTVLARRLPGLT  
LAVPPSQVRWRPPTFRTHGPAELLVGW

>CYP245A7 (2515495853) *Salinispora arenicola* CNT800

MPSATLPRFALTGWSRENIVNPYPVYQRYREVASVHRGEPGGDAPDTFYV  
FSYDEVVQVLSSNCFGRGRSLDAAKASVPVPAEQKALRAIVENWLVFMDP  
PRHTELRSLNRSFSPRIVTELRPRIARIAQELLSRLGQQVDVDLVESFA  
APLPILVISELLGIPEERRAWLRANALALQEASSSRAGRDVDGYARAEVA  
AQEFTEYFREQVRLRRGRAGGDLITILANAQQRGAPVSLDAIVGTCVHLL  
TAGHETTTNSLAKAVLALREHPTVLDELGAEGLTDDAVEEEFLRYDPPVQ  
AVTRWAHQDITLGGCDIPRGSRVVALLGSANRDPARFSPDVLVRRPAD  
RHLSFGLGIHYCLGATLARAELEIGLQALLDGVPRTLGYGTQHVDYADDLV  
FHGPSRLVLVNLGERCK

>CYP244A4 (2515495857) *Salinispora arenicola* CNT800

MSTTTNTELTEAPETNMPVDPGLFDCMPDLIAAARVAPVVRIPYLG RHAW  
VVC DREL VKQAL THPKMGKDIALVPEWMRQPGLM VTAQPDPEYARAMIMS  
DGENHARIRRIHAPVLSRPNTERWGERVADKVEGF LDEL SQAGSGGSTEV  
NVVTNYTHKIPLAFISEMLGLPPEAEHRLRGITDIMLYSSDYAARREAIG  
GLFGAVEDWVRNPADLRDGVITGLLAASDGPDAAVTEGEVIVWTLGMIIT  
GYETTGSLISTSLYEAIRRPPHERPKTDEDITAWIEETLRVHPPFPHPPTW  
RFPLEDIELGGYLIPKGAPVQVSI AAANRKPGE GADSFDAERRGHGHL SF  
GLGMHYCIGAPLVRLEAQIAVRGFLRRFPQARLSAETAVQWESEWMIRRM  
SVLPAVLS

>CYP166A4 (2515495996) *Salinispora arenicola* CNT800

MTDAISFELPWARTDKFDPPAVFDALREQRPLARMRYPDGHVGVIVSSYE  
LVREVLGDPRFSHSCAVGHFPVTHQGQVIPTHPQIPGMFIHMDPPEHTRY  
RRLLTGEFTVRRTSRLTG HVERVATEQIEVMREHGAPADLVATFARPLVL  
RVLSGLVGLPYGERDRYLHAVTLLHDAEADPAEAAAAAYEQAGAYFDEVIE  
RRRRQPEDDLISTLVGDGELTGEELRNIVTLLLFAGYETTESALAVGMFA  
LLYHEDQLARLRADPTKIDAAIEELLRYLTVNQYHTYRTASEHIELHGEV  
INKGDSVTVSLPAANRDPARFACPAELDIDRETSGHVAFGFGI HQCLGQN  
LARVELRAGLSALLRAFPNRLRLAVPADEVPLRLQGSVFAVKNLPVCW

>CYP107AX13 (2515496153) *Salinispora arenicola* CNT800

VTSPPHVAFGHLLRDPHGQYNALRGQAPVHHIRTPDEAPAWLVMRYDDV  
RAALTDPRLSVDKRFSDTDGEHGSSLPPELDAHLLNRDPPDHTRLRLRLAA  
AAFTPRRVADQAPAVATIVDALLDGIAGQDQAE LIGGLASPLPLQVMHEL  
LGLPTQTSVDFRNWTNTLLSADANQPAQSR SAMATMRQFLMGQLARKRAQ  
PGDDLLTGLLAARDDDDRFTDDELLAMVFLLMFAGYDNTAALIGNVTHAL  
LTDAGLHDAVRAGSVDLDSVVDEVLRWNPSFPLAVRRFAREPVAIAGHTI  
PAGDRVWLCLASANRDPAQFTEPDELGITPARRPHLAFGHGIHYCLGAPL  
ARLQTTVAVASLLDRCPGIRLAVPAHELRLWRESFRVRGLAALPVRL

>CYP154M15 (2515496405) *Salinispora arenicola* CNT800

MNDKCPFAALDVTGQDLHGEEARLREQGPAVLVELPGGVKAWSINRYEVI  
RELLMDRRVTKNARKHWP AFIKGEIPPDWEMISWVAMDNMVTAYGKDHR  
LRKLVGRAFTQRRADALRPQVVALSTKLLDDL GATPPGEVVDLRERFAYP  
LPAMLVASLIGMSEAALAACSKVIDMMVHTNVSPEEAQAVLRGWRAAMAD  
LIESKRRTPGEDITTDLIAAREEDGSRLSEAELADTIFAILGAGSETTIN  
FFDNAITALLSRPGQLQLLRTGAVTWDDVIDEVL RVESPLAHLPLRYAVE  
DIELDGVTIPQGDPILVNAAAAGRDPALHGGTADEFDLARGDKTHLSFGY  
GPHYCLGAGIARMVATIGLSMLFERFPDLSLAVPATELKRLP TFIMNGHQ  
TLPVRLTAHAR

>CYP125G6 (2515496430) *Salinispora arenicola* CNT800

VPTLLNEHVSYDGA AIAIVDS DGATSWIRLAERVNRVHLLRAHGLDTGD  
RLACVTGNRRETFEVLLAALHTGVTVPVNWHLTVTEIGHILSDSGSRVV  
ITEELHVKA VAAAADGTAGPVAGLV LGDREVEGF AA VEPLLAASPAEPE  
QQVCGATMLYTS GTTGRPKGVVNNLFVTGAPYARVGRLCDYARSVLGVPR  
RERMLLDGPWYHSSQLFFALLSLLQGSRLVIRPYFDPAATLK TIDDHRI T  
VTHLVPTQLVRLLRVDALTRQMFSGASLRRVWHGGGCPPEVKRSMIDWW  
GPVLVEYYGATEGGVVTLIDSAEWLARPGSVGRAVPPSEVVVVDDGGQSV  
AAGQTGQVFFRRRTGNRFHYHNAPEKTQAAYLAPDTFTYGEVGHVDEDDGY  
LFLTGRAQDMIVSGGVNVYPAEVEAALLRHPVVRDAAVIGVADDEFGERV

VGIVVPETAVDPDDLATHLDAHCRVSLAGFKVPRTYRVVESLPRDETGKL  
RKDALRSKFGWLSGAAMTVPRPATGQPTAHRPDIAHPTTYVSGVPHDEFA  
RRRRDEPVGWVAEPVLTRHTAAGRTATRGSGFWAVTRYEDVVAASRRVTD  
FSSAAKGAFLLTDPRTPADLQQARQLLVNMDDPHHARLRKLVTSVFTPRAV  
RGLLASIDAHAAALVAKVVAAGEFDVVTDLAAELPLLVLADLLGVPKQDR  
ALLYGWSNHLVGFDPDFGGGDIDAYRTAMAEAFQYALNLGVERRARPTD  
DLVSLLANAEVDGTRLTDREFCNFWLLLVVAGNETTRHLVAGTMQALTEH  
PGECARLVEGRVPMESAVEELLRWVTFIMQFRRTATRDTEIGGQAVTAGE  
KVVLYYTSANRDATVFAEPEERLDLGRTPNRQLSFGIGPHYCLGAHLARAE  
LTALLRVMSPHLGSLLQLTGPVSRLASNFVNGVKAMPAVIGSR

>CYP107FS2 (2515496469) *Salinispora arenicola* CNT800

MPVPQGEQNLTTTEVFADPKALFATLGSRQPLHRISLPDGMFAVLVTGNRE  
ARQALSDPRLVRSITAAAPELHKYHPLASDDYALSRHMLFADPPDHGRMR  
KLVSTAFTRRRVEQMRPRIQQITDDLIDVIAAKGEADLVETLALPLPIAV  
ISEMLGVFPFADRSEFERHAEVLTGINASSGFDIAAAGRWFDEYLAGLVQ  
QRRREPQDDLI SGMLAAQDKGDRLTDVELRSNALLLSAGFETTUNLIAN  
GLLALLRHPEAMAALRSEPNLMTTAVDELLRYDSPVSCVTYHFAQEPVEI  
GGFEIRSGEHVVIAAAAAANHDPVFAAPSRLDLRREGSGQILSFSGIHF  
CLGAPLARLEGEIAFGTVLRLRAGLRRLAVPTDSLWVKASFVLRRLERLPV  
TFTPDPRDPNPIDSVHTV

>CYP105CN1 (2515496470) *Salinispora arenicola* CNT800

MAAPAPQATPSTTPHPPSYPLPRECPYRPSAGTAHLRDAGPVSTVRLYDG  
RTAWLVGTGAEEARALLADSRVSNRADFPNYPVMDEHLSMRATREMAREE  
EGGFAAALFGMDPPEHTRQORQLLLPRFTVRQVAARRPAIQRIVDEHLDAM  
EANGSPADLVSAFATPVPTMVVCTHLGVYPYQDRTRFEPVAVAGLFEPDRAD  
AAMAELTAYLHQLIETKQSEPGDGVIDHLIANHLRPGAIDRAELVAIASA  
ILVAGTVTTSSAIALGTLALLTAPGQYTALVDNPDLPVPGAVNEILRYLSL  
VEQLARVATEDIEIGGKLIRAGDGIIVSFAAGNLDPNVTTHPDRLDVALP  
PTNHLAFSHGIIHCIGQNLALLELDIAFRALVSRFPTLRLAVPAEQLPY  
FAGDVPRLACLPVTW

>CYP105CP2 (2515496472) *Salinispora arenicola* CNT800

MTKSMPVQDLPAFPIPRECPYRPSAQHVSLRSGGPMKVRVLYNGRTAWLV  
TDSAHAARVLSYDRRSIKPYHGNYPLLNEEFKVVDSGYADVLFVGDPP  
EHTRQORQMIMPSFTLRRTAVLRPDQIRIVDDKLDEMMPRGAPGDLVTEFA  
QPVPMSMVISFLLGVFWEDHEEFETPAHKLFPVPELAEAEATELGAYLERLI  
QKKEQPGGTGGTGLLDDLDLIRDHLRAGALSRDELVHIAMAMLVAGTDTT  
NVISLGTALALLDNPDQWAALRDNPDELIPGAVEEILRYTSLIEAFARVAV  
SDIELNGAVIKEGEGILISSAGVNFDPALAPDPGRFDIRRPFRPSFSFSH  
GIHRCPGDNLARLELEIAFRSLVTRMPNLRRTAKPIDQIPSNNDGTLQRL  
YELPVVW

>CYP105BL2 (2515496959) *Salinispora arenicola* CNT800

MSSHSAAPDPETATPLHTLAPELAFFQFERSAPFDPPQAYTELSGRCPV  
APVSMADGKPSWLITSFEGVRTTSLSDPRFSSDMSHPGFNRTGKPVDDL  
KDTLGAMDGERHRYRRLTGELTVRRAKAMRPVITQITDEALDQLAAAG  
PGADLVKHVAFVVPSPRVACHLVGIPLSYELFTGMAATLMDSTSSDDQFA  
ALQNMVSYFDTLVTDREHHDRDDLGHMVRRYLATGELTRDMLIRLAWTT  
MAAGQETTAHMIIGLVAALLRHPDQLELLRREPHLLPGAVDELMRYLPLI  
QFGIPRVAMDDVEVDGQTVTAGEGVVALPPLANRDPVFERPDELDVRRN  
ARQHLTFGYGPHQCPAHALARLELEVYGRLLERFPTLRLADSDADLKVQ

DKDIMYRVSELAVTW

>CYP105CH1 (2515497034) *Salinispora arenicola* CNT800

VSSLPLPTYPKLRDPADPLLPPAEYLAIQSEKPIAKVLLPSGRPTWLITG  
HALARQVLTEPCVSVDRRHFNFPYPVPNPDAVVAQVARWTYILLGDDPPL  
HTERRLLI SEFTVRQAQAMRPRIQQLVDFHLEQLIAAGPGADFSKHFAM  
KVPSAVICEMLGVPFADHDYFQERTALQLRRDVPVAAQKQAIDELLAYFE  
QLIQEKSSHPGDDVLSRLIVSNRETEAFDHEALVALGLLLLLVGGHETTAN  
TLTLATATMLERPEIAEQLRTPSLMPSAVEEFLRYFSVAVAVSRIATAD  
LQVGGQLVRAGESMLLVNLTARDGTVFPEPHRLDIRRNARNHLAFSHGI  
HQCMGQNLARVEMQIALDTVLRRLPGLHLVAPFEELPFKYRHLVWGIEEL  
RVAW

>CYP1051A1 (2515497134) *Salinispora arenicola* CNT800

MATDAAITRARTVPAWKALPAAVRDTHRAFVDVGNWSDGDVVRVSLGVSR  
PYLVTNPAHVQEVLEHERAAIYPRGDDTALWRSVRKLVGDGILAEGDAAW  
SRRVLAPMFRPARINAMVDTMADAIAAGAVDDLHGAATAGTPIDVGRELSR  
IVCSAIMRVFFADRITVRDALRIMKAQETIVTAMAPRILAPLVPWWIPMP  
GDRRFRAAVRSIDDILLPVLRLQAQRQPDDGDDLLSRLVRARADDGQALSE  
KMRDDLLVSMVAVTTETSTVVLTWLWPLLANHPDVANRLYDEIDRVVGGG  
PVRGGHLAELTYTRMVLDELLRLYPAGWILPRRAATTDVLGGVRINKGAT  
VILSPYVTQRMATAWWGPTAEAFDPERFAAGREAADGRHRYAYYPFGVGMH  
RCLGEHLFNLEAILIVATLLSRFRFALTDTSMPGVKVAASTRPARTVEMI  
LKPVAPVPAR

>CYP105G5 (2515497154) *Salinispora arenicola* CNT800

LTIETTETPPADDSLAPLPRQFMQRDDPSKLPALAAALAEQSPVGRSTL  
PDGDPFWMVSGYDEARAVLSDPRFSSDRFRYHPRFKKLSGQLGERLRNDK  
ARAGSFINMDPPEHTRYRKLLTGQFTVRRMRQLTVRIEQIVTEQVDVMLA  
EGNSADLVSAFAVPVPSLMICELLGVRVEDRTEFQRRAGLLQTDLPKQ  
AVENLEAQRAFMRQLVTDKRRTPADDMISGLVHHAGAEPPLTDELVGIA  
TLLLFLAGLDTTASMLGLGMFMMLQRPEQMAVLRDDPSRIGAAVEELLRYL  
TVVSTGLFRFAKEDVVLGDEHYPAGSTVVVSLMAANRDGRHWPDPETLDV  
TRVRSSHLAFGHGVHQCLGQQALARIELTVGITELLRRLPNVRLAVPPADV  
PLRNDMITYGVHRLPILWDTF

>CYP107Q4 (2515497155) *Salinispora arenicola* CNT800

MTTTAETS AETIDLFSPEVVADPFGWYARLREETGPTTGTNLNIGTMMGGP  
EMWLVTTRYEDVRQVLTDPRLTNPPADSPLEDIRAGVFKRDLFPDLPW  
MANLLNVSDGEDHTRLRKLVSALT AHRIGKLRPRVEKITADLLDKLAED  
GKDGSPVDLVEEYCYPLPVTVICELVGIDEPRPHWRAGDSMATMNGER  
IPTTLVKCIELARELIANRAEPQDDLVTALVQAQAEQNRVSDDEIIGI  
LFSLVTAGHQTTTYLIGNSVILLLENPDQLARLKDNPSMWPQAVRELQRL  
GPIQFAQPRFPSEDIELGGVTIPRGAPVAPLLLAANTDPRRFPDPNKLI  
DRLAVGSEHGLGFGKGIHRCLGQHLAYQEA EVALQGLFTRFPDLSLAVPR  
EEIPWILRPGFTTRTTLPLKLV

>CYP105AB8 (2515497229) *Salinispora arenicola* CNT800

MTETASSRHTDEFPVQRECPFAEPVEYEQIREQSSIAMVRLTGGGEAWW  
ISGHEQGRAVLADRRFSSDRKANFPFVSTDPAIRKRLHAQPLSLISMDG  
AEHTQARRALIGEFTVRRLAALRPRIQQIVDQCIDEMLTTDQHRADLVKT

LSLPVPSLVICELLGVVYADHDFQEHATLVRRTASEVRQHSIDELNA  
YLGALIDRKLASPDLLGRQIARQHRDGTFRSSMVSLAFLLLVAGHET  
TANMISLGVVGLLQHPEQLTMIKDDPKTPLAIEELLRFFFTIVDSVTSRV  
ATEDVRFGDTTINAGDGVVSGLSADWDPTVFADPDRLDLERGARHHLAF  
GFGPHQCLGQNLARLELQIVFDTLFHRIPTRLRLAAPLDKIPFKTDAAIYG  
ARELPVAW

>CYP211C1 (2515497568) *Salinispora arenicola* CNT800

VVDVEELLTRLISAQGRQDPFPVYADLHARGPIAALPPEPERRRVA AVAV  
GYDLVGAVLRDPEWSKAPPPGWTEQEILRTLQTSMMFINPPDHGRMRHVF  
AGTFTPRRLGALEPVVNRVADELDRMADAGAGGLDFVAEFAYPLPARVM  
AEFIGIPETELDWYRERVDVIDAFLDVAGKTPQRLAANAAGAE LRAFYG  
ELLARRRRTPEGDLISGLVEAVDAGGVELTEDELVSNLIVLFNASFVTTV  
YMLSNGLPVLLAHPEVAAALATDPVLTAGAVDEILRLQAPVHLLARAAPR  
DTVLGGVPI PQGQNVLLLI AAANRDP AHFPDPDRFDPWRSGPPSLAFGLG  
LHYCLGAAVSRLEGRALPRLLSRFPRLRIMEQPVYSGSLFLRGIDKLSV  
SPGEGSTRE

>CYP154M21 (2515497763) *Salinispora arenicola* CNT800

MEKCPYVLDRAGSDIHKEASNLARGPVTLVELHGGYTAVSVTSYEVAKQ  
LLMDPRISKNTKAHWPEFRDGNVPQDWELYTWVAMDNMQTRDGKEHDLRL  
KLVAPAFTRQAVKSRPIIEEIVNRLDDLETAPRGQAVDIKARYFYPLS  
TILVCDLLGIAEEDRDVILHGNVVNSKTTNTAESEANLHQWQTALGR LV  
ETKRDRPDGDLTTV I IKAGEDEQTPLTDDEVIGSLHLLIGGGTETTANVL  
CHTVVMDLTHPDQLAMVRS GAVSWESA WEEEEVRKDGAVGSMFPFCATDDV  
EIGGV TIAKGDVLV L INYAAAGRDPERYGDAAA EFDITRADKANLSFGYGR  
HRCLGPALATMEAMVALPALFDRFPNLALAVPPNELK PQGTFIFNGYAEV  
PLLLRS

>CYP154M13 (2515497764) *Salinispora arenicola* CNT800

MSTGRPVVLDPTGRDIHG EADHLRALGPATLVELPGGVLAWSINSYEVGK  
ALLSAPNVSKSARRHWP AFYNGEIPPDWEMISWVAMDNISTTFGGDHRRL  
RRLTAKAFGSRRAEQVRPMATHMVNTLLDRMADAADAGEVVDLKAAFAYP  
LPGMLVAELIGMSEEARVAAAKVIDMMTATNITPEQAQGVLLGWRDAITD  
LIALKRAQPGDDITS DLIARDEDGSLLTEQELVD TIFAILGAGSETTIN  
FFDNAITQLLTHPEQLELVKSGQVSWDDVIEEVLRL ESPLASLPMRFAVE  
DIQLDGVTIHRGDPILINYAALGRDPELHGESAGVFDVTRQHKEHLSFGH  
GAHYCLGAGIARMVAKTGLSALFERFPRMTLAVSAKDLVPYPTFIMNGNR  
QLPVHLSGALKWREGEQSALGRA

>CYP105W2 (2515497778) *Salinispora arenicola* CNT800

MTGYQDRPTGDQPGAPVPSGSTDPGIGAFPLPRRCPFSPPAEYARLRAEH  
SVVRLPMLGGDTAWVVS RHADVRLSDPRMSADRRRPGF PKFAPTTEGQ  
RQASFANFRPPLNWLDPPEHAICRRQIVDEF SVRRVRQSRALVERVVDTH  
LDALTAAPGADLVSTFAYPVSSQV ICEVLGV PYGEHEFFERRSTLMFRR  
STPADERARCAREIRD FLDVVVTDKEHRPGDDL S RLLYRQRRAGVDHE  
AVVSMAFVLLVAGHVTTSNMLALSVLALLTHPARLARLRAE PERFPAAVE  
ELLRYFTVVEAATARTATAEVTIGGV TIAAGEGVVALGQAANRDP RVFEH  
PDEFDPDRDARAH LAFGHGRHICPGQHLARLEMEVALSRLFRRLPGLRLT  
MEVSDLPLKEDSNIFGLYALPVAW

>CYP248A2 (2515497786) *Salinispora arenicola* CNT800



VLADAVTAFDPTAVDVRRDPYPSYHWLLRHDPVHRGAHQVWYVSRFADVR  
AVLGDERFARTGIRRFWTDLVGPGLLSQIVGDIILFQDEPDHGRLRGVVG  
PAFSPSALRRLEPTIEATVNDLLRPARALGAMDVVADLAYPLALRAVLEL  
LGLPAGDANAVGRWSRAVGRTLDRGATAEDMRRGHAAIAEFADYVERALA  
ERREDGADLLALMLAAHRSQLMsrNEIVSTVVTFFIFTGHETVASQLGNGL  
LSLLDHPEQLELMRRQPHLVPQAVEECLRFDPVQSNTRQLAADVELHGR  
RLRRDDVVVVLAGAANRDPGRYDRPDELDIRRDPVPSMSFGAGMRYCLGS  
YLARLQLRTALGAMVALPDLRLVCNPNELAYQPRTMFRGLTRLPVAFTPA  
G

>CYP154M20 (2515497810) *Salinispora arenicola* CNT800

MERCYPYVLDRAGRDLHGEAKALRARGPVTLEVELHGGYTAVSVTSYEIAKQ  
LLVDPRISKNTKETWPEFREGKVPQDWELYTWVAMDNMQTRDGEEHDRLR  
KLVAQAFTTRQVAKVRPMIEDIVDRLLDDLEKVPAGEVVDIKGRYFYPLS  
TILVCDLLGIPEADRAEALHGTVVNARTTNSAESEANLHQWQSALSKLV  
ETKRREPGNDITTLIIKAREDEQAPLTDDEVIGSLHLLIGGGTETTSNVL  
CNTLIDLTLTHPDQMAMIRSGAVGWEAAWEEEVKRDGAVGSMPPFRCANADI  
EIGGVTTIAKGDVLVLINYAAAGRDPERYGDTTAEFDITRADKTNLSFGYGR  
HRCCLGPALATMEAMISLPALFERFPDLVLAVPRDELKPQGTFFVNGYAEV  
PMLLRS

>CYP107FJ2 (2515497817) *Salinispora arenicola* CNT800

MSETLSTSVLLADAAEQRAWRAKLRGAGPVHRITTSQGETGWLIVGHEEA  
RNALVDLRLQGRATATVGHGRMPEDLERALNSHMLNVGPPDHTRLRLRLVS  
AAFTRRRIEQMRPRIQELTDELLDGLAGADEADLVAGLALPLPMRVLVDL  
FGIPAEDCADFNVTWKVLTSAVAVDLDRLTAAAGEMVAYLRGLLDRKRQV  
PESDLSALVAVRDGADRLSDELTSMVYLLLTAGYETTVNLIGNGLLNL  
LANPEQLVAFKADPDLQPQVVEEAMRFDSPVQIAVRHSTEPVEIAGQAIP  
SGALILVSLWANRDPDRFTEPEAFRVDRQDNQQLGFGYGFHHHCIGAPLA  
RMEGTIAIGTVIRRFAPALRLAHPAGSLTWRASMVMHGLTALPVHLR

>CYP107EU1 (2515498322) *Salinispora arenicola* CNT800

VTIGQTLPLVYSPEFTRDPYAI FARLREQAPVCRVTTHRGMSAWMVTRH  
ADVRALLADNRLAKDGNRIGELMPRHSTLTGAATGFPPGLTTNMVNSDPP  
DHTRLRHLVGREFTGHRVEGLRPRIEEIVDDLLDGVAACGDEADLAETLA  
RRLPIAVIGELLGVPEADRAEFFRWADTLYGGTASPEALGQAYNAIVDYL  
GRLCDAKRDPADDLLTALVQVSADEDRLSREELVSMALLLLLVAGHETTS  
KQISNGVLALLLNPEQLKLLKAQPARTAGAVEELLRFEGPSLSASLRFTT  
EPVEVAGVVIPEGEFVLLSLASGNRDEPKFPDPDRLDITRSTQGNLAMGH  
GIHHCVGAAALARLELIVLSRLVARFPQMQLAVEADDLEWLNVNSFFRAPL  
HLPVSLRR

>CYP162P1 (2515498373) *Salinispora arenicola* CNT800

MGLPSEVDLAEPDLADPDLYAEGDPDAEWAWLRAHRPVYRNPAGATAEFW  
ALTRYRDALQVYRDPSTFSSERGMVLGVDPVAGDPAAGRMLVVTDPPRHP  
KLRRIVSGIFVPRTMHRLEGRVRSVLDQLLHRVVDGAGRCDFVNDVAARL  
PVAIIICELLGVPADEQDWMYHLTSTAFGGGDPAGSAEVS AVERAEAYGDI  
LLYYGELAAERRRRPGDDLVTLLVHADLDGEPLDVEDVLVNCTNLIIGGN  
ETTRHAASGGLLALAQRPELWRRLRETPTAVPTAVEEVLRWTTPGMHVLR  
TATRDTEIGGVPIRAGERVVVWNAANRDEDVFADPQHFDIDRSPNRHIA  
FGQGGHHCLGAALARLELTILFEEMAKQVTNVRLTGPVRRVRSCVLRGIR  
ALPVELVT

>CYP1198B1 (2515498444) *Salinispora arenicola* CNT800

MSGELTDQRTAPGAGGNPLRSLMDHGIRANPYPLFGELREAGPTAVEDGS  
VVLFGGEYEHCSQILRHRDMGSDTSEAPSIKGFVVDDAERAGSSIFFMDQP  
GHGRQKRLVSKSFTPRIVKSFGPQITHIVDGLFEDFRDRGELDVVTDLAY  
PVSIGIICDLFGIPDDERDMLKEWSDDLALSTELPTLGAAIGVLNVFTRD  
EINRFGSVAMAAHAYFADLIHRRRKNPGDDLVSLLATESNGERLTRFEV  
TSVLATLFVAAHESTTNLISGGILALLRNQDQMAVLRENPGELITNVVDES  
LRYDPPVHLAARMARARTTIGGYDLDPGTIVVVLMAAGNRDPRAYENPDV  
FDVNRKIRNVSLAFGAGAHFCIGSGLAKLEAEIAISAFQAQLKHPEVDES  
SLEYRRHIVVRGLEHMKVAFQP

>CYP125A66 (2518501913) *Salinispora pacifica* CNS055

MTEPRIPVGFDFTDPAVLERRVPREEFAELRRTAPVWWNAQPKGSGGFDD  
DGYWVVTRYADVMASRDSETYSTRENTAIARFQPGTTQADREMQRVIMI  
NVDPPPEHTKLRAIVSRGFTPRAINALRGSLAERAERIVRDAAARDTGDFV  
TDVACELPLQAI AELIGVPQHHRKVFWDWSNQLIGYDDPAYGVDPMAASA  
ELLAYAMEMAHERQRNPSDDLVTQLVNAQIDGEHLTADEFGFFVMLLAVA  
GNETTRNAITHGMLAFLENPEQWELFKAERPRSAVEEII RWATPVNVFQR  
TALVDTTLAGQAI SAGQRVALFYGSANFDES VFEEPERFDITRSPNPHLG  
FGSGGVHFCLGANLARLEIELIFNSIADHLPDIRQLADPQRLRSGWINGI  
RELFPQYH

>CYP107AX8 (2518502212) *Salinispora pacifica* CNS055

MTSPAPVFDQLLLLRDPRRRYNALRDEAPVHHIRTPDGAPAWLVTRYDDV  
RAAFTDPRLSVDKRLSSTDGEHGSSLPPELDAHLLNRDPPDHTRLRRFAA  
AAFTPRRVADLRPAVERIVSTLLDGLAGNDQAEI LDSLASPLPLQVMQEL  
LGLPTQTSVDFRTWTNTLLSADANQPAQSRSAMANMRRFLIEQVARKRAQ  
PGDDLLTGLLAARADGDRLTDELVAMLFLLMFAGYDNTAALIGNVAHAL  
LTNAELAEAVRTGSLALDELVDGVLRWNPSFPLAVRRFAREPVTIAGQLI  
PAGDRIWLCLASANRDPAQFTEPDTLGTTGMRRPHLSFGHGIHYCLGAPL  
ARLQTTVAVTSLDRFPGIRLAVPAHDIRWRESFRLRGLVALPVFL

>CYP107AW8 (2518502225) *Salinispora pacifica* CNS055

VETVTGTSAPPPVPYIADPYPTLARIRANGPVSILHSDEGLPMWVIARYR  
DVRAALADPRFGQDSRRAQALADNRVAGVTLGGDIVHMLNSDPPDHTRLR  
RLVQGAFTARRVAAMRPLVERITTSLLDGLAGRTTVDLVQDFAFPLPMLV  
ICELLGFPAEERNAYRSWSTAILTHDDDPAAAFATALREMTDYIAVQLRIR  
QTRPVDDLLELLAARDAGQLTDDEIIGMVFLLLIGGHETT VNLLGTATL  
ALMRNPDQHRWLLANQPALPEAIDEFLRYESPVAMATLRFTTTPVAVDDV  
VIPAGELVLVSLGGANRDPDRFPDADRLILDRHDTGHAFGHGLHRCLGA  
FLGKLEGEVALGALLRRHPRLALATEVRQLRWRDTIMLRGLES LPVSLHG

>CYP162H1 (2518502365) *Salinispora pacifica* CNS055

MTAVTDVDVADPTLHRD GALPPVWRWMRRHDPVRWTVRPNQDSYWSVTTH  
AEAVRVL RDSRTFSSERGIRLGADPVAAAAASRRMLIVTDPPRHADLRRI  
IASAFTARTVRRLEQNMR ETVTASLDHA FERAGAGDFVEVAGR LPVSVICD  
LLGVPREDWDFFLLGR TTVAFGAVDEHGSPTAEAVEAHADILLYHLELARQ  
RRRDPREDVV TALVQGEVDGRPLTDEEILLNCDGLISGGNETTRHAAVGG  
LLALAADPGQWRALRANPDLLPTAVDEILRWTTPGAHTLR TAVGDTELAG

RAIEAGQQVVVWGGSVNRDEAVFDQPDEFRLDRKPNRHLLTFSHGAHYCLG  
SALATSELRVLFGEELARRVAGIEVAGPVERVRSNHINGFDRAVVKLHPVT  
AGGGRHG

>CYP1005A6 (2518502695) *Salinispora pacifica* CNS055

VSAVLFRSWTKTAGTHWPAVTRVADQQGTEHLVVTEHALVRQVLTDQVTY  
RPDNALDAVTPIPVAAALRVLAGHRFRLPPTLANNGGVNHPAIRALVADAL  
HPAKVAAQRPWLTGLVAERVAAIRATLDAGGSADLHAELSADLPLLVLAR  
LVELPDAPVSAVKRFARAALFLFWAPLDADRQLALADEVGRFHHQVLRFA  
DTGGGLAAALRATGHPPDVLVVGALFFLLVAGQETTSQFLTLLHLHRLAGEP  
TVRAALRDGVSVPNVVEEGLRLEPPIVTVRRVAAVDSTLGGTAVPAGTS  
VLLWLARAGRDPPIVPADEFPRPGQRGSRRLAFGAGAHRCCLGDQLARME  
AAVVVEQVTPLEGVTVVRAPWYPDNLTFRMPDAFVISR

>CYP211B15 (2518502986) *Salinispora pacifica* CNS055

MDASEAVTLLMSPSGRLDPYPTYERLRAHGPPVPTAAGFFVVTGYTEADA  
VLRNPRFGVMDDEERDGVFPHWQESPAMMSISRSMIRANPPDHSRMRLA  
AKAFTPRRVAALREVVAQAADGLVDEMIRAGRGAPVDFLSSFAYPLPVA  
VICALLGVPAADWAQFRRWASDLTGVLPEEITPQELAVADAGAGELRDYF  
TELVAQRRRAPADDLTALVQAHDADGDRLSGEELLANLVLLLVAGFETT  
TNLLGNGLVLLDHPDSVTALRDQPELAPGYVEELLRYDSPVQLTTRTIR  
ESVPLAGVELPAGSWLLVLLGAANRDPARFTDPARFDPRAQSPPLSFGA  
GAHYCLGAGLARLEAQVAFPLLLRRLPGLALAGEPTRNRRLTLRGYETLP  
VTVGAVAADHGTAPAGVALGTP

>CYP105AB31 (2518503325) *Salinispora pacifica* CNS055

MTETASTTTPGTSSTATSGPASGEVTDTEFPVERGCPFSTPAEYEQIREH  
SPLAKVRLTTGREAWWIAGHELARAALADRRFSSDRRRDNFPFVSTDPET  
RKQLQDQPTSMGLMDGAEHAQARRALMGFTVRRMAELRPRIQQIVDQHI  
DEMLSSEQRSADLVEALSPLVPVSLVICELLGVADHDFFQSRSGPLVRH  
HTPSKVRVRIQEELNTYLGEIDRKVTDPTDDLRSRQIAKQHAAGTFDRT  
SLVSMAFLLLIAGHETTANMISLGVVGLLQHPDQLAMIKNDPEKTPPAVE  
ELLRYFTITDVTARVATEDVRLGDTTINAGDGIVISGLAADHDPTVFTD  
PDRIDLERGARRHVAFGFGPHQCIGQTLARIELQIVFDTLFRRIPTLRLA  
APLDDIPFKSDAIYGAEEELPVAW

>CYP1611B1 (2518504475) *Salinispora pacifica* CNS055

MTTRSGLLPTPPMPVGLPLLGSMLWQRDHAGFFQRAYERYGPVFSVRLG  
PQRGVVLVGPDYHDFFFKEVDKRLSVPELYRFVVPFMFGDVALASRDPQTR  
RRHVGLLHSAFQQRLSAYSRLAAEETHAWLDGLGGSGRFELWREMEGLV  
MRIAASSTLLGPEVRARVDDFRPLLADLARGMDVFLPPYLPLPKFIRRDQA  
RRRLTEMIKPVLAERRRRVDGPPDFLQTLVHDPGVGGESDERLIGMSLMT  
LFTGYLTTCQAQLAWALVLLVQHPAHLATVVAEVDAAACADGRVPVEARLP  
RLDRALKEAIRLRPVMASHYARHNRTDIEVDGYRLPAGWLTMLCPAVAHRL  
PEVFTDPDRYDPERFGPDRAEDRRHPYALIGFSGGFYRCPGSAFGMNEMR  
IVIAALLARFRLVAPAVEPVPAPFDMGVTRPASPCMMDYRLRD

>CYP2098A1 (2518504478) *Salinispora pacifica* CNS055

MTTSADMTYDPFDPKLVQDPHSFYHRIRQLSPVFPSTMSSDMWMVSDDAT  
TVYVVTSYDELAYVLEHPDLFPSGNKTGPEDPPEVTEELARGIPKAKTLY

DSDQPNHTRLRALMQGAWSAQRVESFAPRIQWWADRMIDRFAERGAAELV  
ADYADPAMDHAILDFLGIPEEDHERVHAWDKLWVKVFI PGHPPEDQRAAA  
REIVEYQRYLEQLFVERRANPRDDVASALVHATTEDGDRLTMAELVWGLM  
EMYGAGYGNTAEALSNMLFLLLHERQRWTDLRQRREALPDAVEEGLRLEG  
PVQWLSREAAQDTELGGATI AKGSTVMVIYSAANRDPEAFPEPDEF RPER  
RGATRTGAKHVAHGRGIHYCVGAGWSRVAIRAGLAAIMDRLPDLRLADGF  
TPEFHLPEPMVRCVKTLPAVWPAR

>CYP1004B3 (2518505666) *Salinispora pacifica* CNS055

MTTSALAPRFDALDPNVVEDPYPEYARLRAAGPLCRLGPGSWGVT RFADV  
TSLQHDPRLGSEFP SGYEISVGDGPASAFFQRVMLYRDPDPH IRLRRL  
SGAFTPAVVRRLRSHIEDLVDELLAPTLAAGRMDLVPELAYPLPVRVICR  
LMGIPPESAEDVRHHATNIGRAFTAVVPEQARIEADEAVSWLREHLGALL  
EQRRSRPGDDL SRLLD AEESGDNLSADEIVDNTVFSFFAGFETTVHMIT  
TGTAALLAHPDQLARLRADPSLVTTAVDEF LRWD APIQGTARYVREPIEI  
GGRTIRRGRVLVLMVGSANHDERRFTRPDRLDVGRQDNPHVAFGGGAHLC  
LGAFLARMEGAVVFDRLARLAVLEPDGPTVREPNTPF RAYASVPVRIGDG

>CYP1004A4 (2518505670) *Salinispora pacifica* CNS055

MRANTARPHLSAAFLATEDDPYPAYAE LRARGPLTRAELGQWLVTGHGAV  
SALLRDGRLESRM PAEYTRLTLGDS PGVDFLDRIVLTRTPPEHTRLRRFI  
GRALGTPVVRRLHDRIAAATDALLEPALDRGRLDVVT ELAVPLPVG VCD  
LIGIPTGDRPAVLTRVTALAKVFDAANLSPADLADINTALPWLHDYFGDL  
LAIHRGSPGGPTLAEMYWEESASDRLAVADFVDNMLFLFHAGFETTMGLV  
SNGVAALLNHPEQLGRRLRADPALVPSAVEEFLRYDAPIQNVIRVARKPVE  
VAGQKIRAGR PVLLLLGAANRDEEVFADAERLDVGRDPNPHLGFGGGLHH  
CVGTALARLMAVVVFERLVGRVAVLGPAAPAVRRRHASLSYDRLPLAVA  
AR

>CYP125G4 (2518505709) *Salinispora pacifica* CNS055

MSTEIVSTGNRADI AHPATYAAGVPDAEFARLRREEPVSWVPEAPLWRRS  
GEGRILSQGP GFWAVTTHEGVVAASRQPEVFSSGRQGAFLADPR TTADLE  
QARQLLVNMDAPQHARVRKLVTA VFTPRAIRALGESVTAHARNLVERAVR  
QEECDVVADLAAELPLLVLADLLGLPREDRHL LYQWSNNLVGFDDPEYGG  
GDVEAYRKTFFEAFQYALSVADERRRAPRGDLMTLLATGEADGRRLTDRE  
FCNFWLLL VVAGNETTRHLITGSVLALVDNPMQRERLVADD TLLPSAVEE  
LLRWVSPIMQFRRTAIVDTELCGTPIAAGDKVVLWYASANRDAAVFEAPD  
ELRLHRNP NPHLSFGMGPHFCLGAHLARLEARTMLRELAPHL SRFRLTGP  
VVRLESNFVNGVKS LPGSFTGH

>CYP107AY12 (2518505770) *Salinispora pacifica* CNS055

MSQDQQLAPI PRSGARLGQEYDQLRKTDGVHQVLLPDTSLAWLV TNPELV  
SRALADPRLALNRKHSRGW SGFALPPALDANLLNLDAPDHTRLRRLVGP  
AFSPQRVAALRPRIQRTAEELVDTVLATGSPVDLVTGYCTPLSVQVIADL  
LGVPEAGRTDLRAWTDMLTSYPPDRDAIRQAVVELHG YVINLIEAKQQR  
PGDDL SALSALVATEQEGDRLTRDELTS LAFLILFAGYENTANLIAS TVLRL  
LDQGS LRGVRAPEAVEETLRLEPSAPVAIRRFTEELTIGGATIPAGDTV  
VLSIAAATRGADGNSARLAFNGPHFCLGAALARVEAE EAITVLARRLPS  
LALAVPGAPVRWRPTFRTHGPAELLVTW

>CYP162J1 (2518506317) *Salinispora pacifica* CNS055

MTVAVRTTPPAAFFPDGTPTRQIDGIDISTDLGDPGLYAHGRPERLWAVL  
RHHHPVHWNARPD RP GFWAVTRYAEAVQVLRDTAGFGSEKGMRLDADPAA

NTAAAGRMLIVSDPPRHGPMRRALAKAFTPTVVARLRASMLAYVDDALDL  
MTERSTAGEATEFTEVASRLPVAVICDLLGVPGQDHDfMLDRTRIAFGET  
PEGTAAADAKAVSRAHADILAYYAGLVRSRRADPQDDIVTAMVHADMGGR  
PMTDLEIYLNcNGLVSGGIETTRHASVGGLLALIEDPREWDRLHAVSAGA  
GAPDAAVAEILRYTSPAMHVLRTATADTTIGEQQPVREGDQVTVWLAAANR  
DPAVFTDPDRFDIGRDPNPHLAFGIGQHHCIQSALARTELSVLFGEVLVRR  
FRGAETTGPFRRLPSTLIRGYESLPVLAHV

>CYP107E38 (2518506557) *Salinispora pacifica* CNS055

VTIDQEIRKYPFRESPIGIDPTYELLRRTEPLARVQLPYGEVSWLATRY  
EDVKTVLTDPRFSRAAAQGKDQPRTRAEMTYEGIIIGLDPPDHTRLRKLKAG  
KALTARRVNAIRADAQRIANEYVDELIAGKSPGDLVELFALPYPVTVICE  
LLGVPFEDRAQFRIWTEGLTSTSEQLMVYAEQLFGYMGKLVAQRRAEPTD  
DLLGALVKARDEGDRLTEQELLSIAGVGLLLTGIVETVSTHIPPVYALLT  
HPELMAQLRADRSVLPAAVEELLRMIPLNPAAMFPYAYEDATLSGITVR  
AGEPVLVSLPGANRDPEVFENPETIDFTRDPNPHVAFGHGPHHCLGAQLA  
RMELQVALHTVLDLRFDPDLRLADGDAGVSWKSGLLVRGPKRLLVAV

>CYP105BL2 (2562091612) *Salinispora arenicola* CNY486

MSSHSAAAPDPVTATPLHTLAPELTFPQFERSTPFDPPQAYTELSGRCPV  
APVSMADGKPSWLITSFEGVRTTLSDPRFSSDMSHPGFNRTGKPVDDLL  
KDTLGAMDGERHRYRRLTGELTVRRAKAMRPVITRITDEALDQLAAAG  
PGADLVKHAVFVVPVSRVACHLVGIPLSDYELFTGMAATLMDSTSSDDQFA  
ALQNMVSYFDTLVTDREHHRDRLDGLGHMVRRYLATGELTRDMLIRLAWTT  
MAAGQETTAHMIGLGVAALLRHPDQLELLRREPHELLPGAVDELMRYLPLI  
QFGIPRVATDDVEVDGQTVTAGEGVVALPPLANRDPAVFERPDELVDVRRN  
ARQHLTFGYGPHQCPAHALARLELEVYGRLLERFPTLRLADSDADLKVQ  
DKDIMYRVSELAVTW

>CYP125A41 (2562092017) *Salinispora arenicola* CNY486

MTEPRIPAGFDFTDPEVLAHVRVPREEFAELRRAPVWWNAQPRGSAGFDD  
DGYWVVTRYADVMTVSRSDTYSTRENTAIARLRPDTTREDIEMQRVIML  
NVDPPEHTKLRAIVSRGFTPRAINALRGSLAERAHIVRDAAVRGVGVDFV  
TDVACELPLQAIAGELIGVPQHRRKVFWDWSNQLIGYDDPAYGTDPLTASA  
ELLYAMEMAEERQSPSDDLVTKLVAQIDGELTTEDEFGFFVMLLAVA  
GNETTRNAITHGMVAFLDNPEQWELFKAERPKSAVEEIIIRWATPVNVFQR  
TALVDTVLGGQAIASAGQRFVLFYGSANFDEAVFEDPERFDITRSPNPHLG  
FGGSGAHFCLGANLARLEIELIFNSIADHLPDIRKVAAPQRLRSGWINGI  
RQMPVRYR

>CYP211C1 (2562092166) *Salinispora arenicola* CNY486

VVDVEELLTRYSAQGRQDPFPVYADLHAQGPIAALPPEPERRRVAAVAV  
GYDLVGAVLRDPEWSKAPPPGWTEQEILRTLQTSMMFINPPDHGRMRHVF  
AGTFTPRRLGALEPVVNRVADELDRMADAGAGGLDFVAEFAYPLPARVM  
AEFIGIPETELDWYRERVDVIDAFLDVAGKTPQRLAAANAAGAELEAFYF  
ELLAHRRRTPEGDLISGLLEAVDAGGVELTEDELVSNLIVLFNASFVTTV  
YMLSNGLPVLLAHPEVAAAALATDPVLTAGAVDEILRLQAPVHLLARAAPR  
DTVLGGVPIPPQQNVLLLIAAAANRDPAHFPDPRFDPRRSGPPSLAFGLG  
LHYCLGAAVSRLEGRALPRLLSRFPRLRIMEQPVYSGSLFLRGIDKLSV  
SPGEGSTRE

>CYP105AB36 (2562092281) *Salinispora arenicola* CNY486

MTEAASSRLTDTEFPVQRQCPFAEPVEYEQIREQSSIAMVRLTGGGEAWW  
ISGHEQGRAVLADRRFSSDRRKANFPFVSTDPATRKRLHAQPLSMISMDG  
AEHAQARRALIGEFTVRRLAALRPRIQQIVDQCIDEMLTTDQHCVDLVKA  
LSLPVPSLVICELLGVYPYDDHDFQEHATLVRRTAPEVRQHCVDLNA  
YLGALIDRKLANPDDDLLGRQIARQHODGTFDRASIVSLAFLLLVAGHET  
TANMISLGVVGLLQHPDQLTMIKKDPDKVPLAIEELLRFFTIVDSVTSRV  
ATEDVRFGDTTINAGDGVVVVSGLSADWDPTVFADPDRLDLERGARHHIAF  
GFGPHQCIGQNLARLELQIVFDLTFRRIPTLRLAAPLDKIPFKTDAAIYG  
ARELPVAW

>CYP1005A1 (2562092841) *Salinispora arenicola* CNY486

MTAGTRWPDVTRVADQSGTEHLVVTRHALVRQVLTQATYRPDNAMEAVT  
PIPVAAALRVLAGHRFLPPTLANNGGVSHPAIRALVADALHPTKVAAQRP  
WLTGLVADRVATIRTTLDSGGPVDLYADLTADLPLLVLARLVELPDAPVN  
AVKQFARAALFELFWAPLDADRQLALADEVGRFHQVREFADTGGGLAAAL  
RATGHSPDVLVGALFFLLVAGQETTSQFLTLLHRLSGEPTIRAALRAGS  
ISVADVVEEGLRLEPPIVTVRRVAAVDSTLGGTTVAAGTSVLLWLARAGR  
DPAVVAAPDEFPRPGQRGSRRHLAFGAGAHRC LGDQLARMEAAVVVEQATP  
LLDGVTVVRPPWYPDNLTFRMPDAFVVR

>CYP245A7 (2562093653) *Salinispora arenicola* CNY486

MPSATLPRFALTGWSRENIVNPYPVYQRYREVASVHRGEPGGDAPDTFYV  
FSYDEVVQVLSSNCFGRGRSLDAAKASVPVPAEQKALRAIVENWLVMFMDP  
PRHTELRSLNRSFSPRIVTELRPRIARIAQELL SRLGQQVDVDLVESFA  
APLPILVISELLGIPEERRAWLRANAMALQEASSSRAGRVDVGYARAEVA  
AQEFTEYFREQVRLRRGRAGGDLITILANAQQRGAPVSLDAIVGTCVHLL  
TAGHETTTNSLAKAVLALREHPAVLDELRGADGLTTDAVEEFLRYDPPVQ  
AVTRWAHQDTTLGGYDIPRGSRVVALLGSANRDPARFPSPDVLVRRPAD  
RHLSFGLGIHYCLGATLARAELEIGLQALLDGVP T LGYGTQHVDYADDLV  
FHGPSRLVLVNLGERCK

>CYP244A4 (2562093657) *Salinispora arenicola* CNY486

MSTTTNTELTEAPETNMPVDPLFDCMPDLIAAARVAPVVRIPYLGRHAW  
VVCDELVKQALTHPKMGKDIALVPEWMRQPGLMVTAQPDPEYARAMIMS  
DGENHARIRRIHAPVLSRPNTERWGERVADKVEGF LDELSQAGSGGSTEV  
NVVTNYTHKIPLAFISEMLGLPPEAEHRLRGITDIMLYSSDYAARREAIG  
GLFGAVEDWVRNPADLRDGVITGLLAASDGPDAAVTEGEVIVWTLGMIIT  
GYETTGSLISTSLYEAIRPPHERPKTDEDITAWIEETLRVHPPFPHTW  
RFPLEDIELGGYLIPKGAPVQVSIAAANRKPGE GADSFDAERRGHGHL SF  
GLGMHYCIGAPLVRLEAQIAVRGFLRRFPQARLSAETAVQWESEWMIRRM  
SVLPAVLS

>CYP105J4 (2562093786) *Salinispora arenicola* CNY486

MTDSVAFFPQGRVCPHQAPAGYRPLAAQRSLAQVTLYDGRRVWAVTTRDLA  
RRLLVDPRISSDRNTNPAWPAIVPIVAAAVNDAQQKVLRIATALVGTDGPE  
HKAQRRMLIPSFTFRRMNALRPMIQEIVDQQ LDEMIKSGAPTDLIPAFAS  
AVPVTVLYRLMGIPDDDHGIFEKLSHQLLAGPHANEAYDQLMDYMSTLVA  
ERRRNPGEGLVDDLQAQHGANDDVHDELVSTLVVQVAGNHGTTGSMIAL  
GLFALLQHPEQLAELRANPSLMPTAVDELLRFLSV PDAVTRLAADDIEVE  
GTIIRKGDGVFFITSLINRDTDVHDAPNSLGWHHASAADHLTFGFGAHQC  
LGQSLARITMEIALGALIDRLPSLRLAVPAEEVPFLPAASLQVMAELPIT  
W

>CYP107FS2 (2562094229) *Salinispora arenicola* CNY486

MPVPQGEQNLTTTEVFADPKALFATLGSRQPLHRISLPDGMFAVLVTGNRE  
ARQALSDPRLVRSITAAAPELHKYHPLASDDYALSRHMLFADPPDHGRMR  
KLVSTAFTRRRVEQMRPRIQQITDDLIDVIAAKGEADLVETLALPLPIAV  
ISEMLGVFPFADRSEFERHAEVLTGINASSGFDIAIAAGRWFDEYLAGLVQ  
QRRREPQDDLISGMLAAQDKGDRLTDVELRSNALLLSAGFETTVNLVAN  
GLLALLRHPEAMAALRSEPNLMTTAVDELLRYDSPVSCVTYHFAQEPVEI  
GGFEIRSGEHVVIAAAAAANHDPTVFADPSRLDLRREGSGQILSFSGIHF  
CLGAPLARLEGEIAFGTVLRRLAGRLAVPTDSLWVKASFVLRRLERLPV  
TFTPDRAPNPIDSVHTV

>CYP105CN1 (2562094230) *Salinispora arenicola* CNY486

MAAPAPQATQSTTPHPPSYPLPRECPYRPSAGTARLRDAGPVSTVRLYDG  
RTAWLVGTAAEARALLADSRVSNRADFPNYPVMDEHLSMRATREMAREE  
EGGFAAALFGMDPPEHTRQRLQLLPRFTVRQVAARRPAIQRIVDEHLDAM  
EANGSPADLVSAFATPVPTMVVCTHLGVQPYQDRTRFEPVAGLFEPDRAD  
AAMAELTAYLHQLIETRQSEPGDGVIDHLIANHLRPGAIDRAELVAIASA  
ILVAGTVTTSSAIALGTLALLTAPGQYAALVDNPDLPVGAVNEILRYLSL  
VEQLARVATEDIEIGGKLIRAGDGIIVSFAAGNLDPNVTTHPDRLDVALP  
PTNHLAFSHGIHHCIGQNLALLELDIAFRALVSRFPTLRLAVPAEQLPY  
FAGDVPRLACLPTW

>CYP105CP2 (2562094232) *Salinispora arenicola* CNY486

MTKSMPVQDLPAFPIPRECPYRPSAQHVSLRSGGPMKVRLYNGRTAWLV  
TDSAHARAVLSYRRVSIKPYHGNYPILLNEEFKVVDSGYADVLFVDDPP  
EHTRQRMIMPSFTLRRRTAVLRPDIQRIVDDKLDMMRHGAPGDLVTEFA  
QPVPMSMVSFLLGVFWEDHEEFETPAHKLFVPELAEAEATTELGAYLERLI  
QKKEQPGGTGGTGLLDDLRDHLRAGALSRDELVHIAMAMLVAGTDTT  
NVISLGTALLDNPQWAAALRDNPDDELIPGAVEEILRYTSLIEAFARVAV  
SDIELNGAVIKEGEGILISSAGVNFDPALAPDPGRFDIRPPRPSFSFSH  
GIHRCPGDNLARLELEIAFRSLVTRMPNLRATPIDQIPSNNDGTLQRL  
YELPVVW

>CYP166A4 (2562094319) *Salinispora arenicola* CNY486

MTYAISFELPWARTDKFDPPAVFDALREQRPLARMRYPDGHVGVIVSSYE  
LVREVLGDPRFSHSCAVGHFPVTHQGQVIPTHPQIPGMFIHMDPPEHTRY  
RRLLTGEFTVRRTSRLTGHVEGVATEQIEVMREHGAPADLVATFARPLVL  
RVLSGLVGLPYGERDRYLHAVTLHDAEADPAEAAAAAYEQAGAYFDEVIE  
RRRQPEDDLISTLVGDGELTGEELRNIVTLLLFAGYETTESALAVGMFA  
LLYHEDQLARLRADPTKIDAAIEELLRYLTVNQYHTYRTASEDIELHGEV  
INKGDSVTVSLPAANRDPARFACPADLDIDRETSGHVAFGFGIHCCLGQN  
LARVELRAGLSALLRAFPNLRRLAVPADEVPLRLQGSVFAVKNLPVCW

>CYP107AW7 (2562095325) *Salinispora arenicola* CNY486

VETVTGTSTPPPVPYIADPYPTLARIRANGPVSIHLSDEGIPMWVIARYR  
DVRAALADPRFGQDARRAQALADNRVAGVTLGGDIVHMLNSDPPDHTRLR  
RHVQGAFTARRVAAMRPLVERITTSLLDGLTGRTTVDLVQDFAFPLPMLV  
ICELLGFPAEERNAYRSWSTAILTHDDDPAAAFATALREMTDYIAVQLRIR  
QTQPGDDILGDLAARDAGQLTDDEIIGMVFLLLIGGHETTVNLLGTATL  
ALMRNPDQHRWLLANQHALPEAIDEFLRYESPVMATLRFTTTPVAVDDV  
VIPAGELVLVSLGGANRDPDRFPDADRLILDRRDTGHLAFGHGLHRCLGA  
FLGKLEGEVALGALLRRHPRLALAAEVRQLRWRDTIMLRGLESPLVSLHG

>CYP107AY2 (2562095370) *Salinispora arenicola* CNY486

MTAEPTPIPRSGTRLGPEYDQLRKTDGDVHQVLLPDASLAWLVTNPEVAAR  
ALADPRLALNRRNSRGGWSGFALPPALDANLLNLDAPDHTRLRRLVGPAPF  
SPQORVAALRPGIRRAAEHLLDTLVATSGPTDLVTGYCNPLSVQVIADLMG  
VPEAGRTNLRATDTMLTSYPPDRDAIRQAVTELHGYVVDLIDIKQQQPG  
DDLLSALVTIEQDGDRLSRDELTSLAFLILFAGYENTANLIASAVRWLLD  
HGGLNVVPISEAIEGTLRHEPPAPVAIRRFPTEDIIIGGV TIPAGDTVLL  
SIAAATRGADGNAARLAFGNPHYCLGAALARVEAEEALTVLARRLPGLT  
LAVPPAQVRWRPTFRTHGPAELLVGW

>CYP107Q4 (2562095395) *Salinispora arenicola* CNY486

MTTTAETS AETIDLFSPEVVADPFGWYARLREETGPNTGTNLNIGTMMGGP  
EMWLVTTRYEDVRQVLTDPRLTNPPADSPLEDIRAGVFRRLDFPPDLIPW  
MANLLNVSDGEDHTRLRKLVS YALTAHRIGKLRPRVEKITADLLDKLAED  
GKDGSPVDLVEEYCYPLPVTVICELVGIDEPDRPHWRAWGDSMATMNGER  
IPTTLVKCIELARELIAKRAEPQDDLVTALVQAQAEQDNRVSDDEIIGI  
LFSLVTAGHQTTTYLIGNSVILLLENPDQLARLKENPSMWPQAVRELQRL  
GPIQFAQPRFPSEDIELGGVTIPRGAPVAPLLLAANTDPRRFPDPNKLI  
DRLAVGSEHGLGFGKGIHRCCLGQHLAYQEA E VALQGLFTRFPDLTLAVPR  
EEIPWILRPGFTRTRTLPLKLV

>CYP105G5 (2562095396) *Salinispora arenicola* CNY486

LTIETTETPAADDSLRAPLPRQFMQRDDPSKLPALAAAEQSPVGRSTL  
PDGDPFWMVSGYDEARAVLSDPRFSSDRFRYHPRFKKLSGQLGERLRNDK  
ARAGSFINMDPPEHTRYRKLLTGQFTVRRMRQLTVRIEQIVTEQLDVMLA  
EGNSADLVSAFAVPVPSLMICELLGVRYEDRTEFQRRAGLLQTDLPKQ  
AVENLEAQRAFMQRLVTDKRTTPADDMISGLVHHAGAEPPLTDDELVGIA  
TLLLFLAGLDTTASMLGLGMFMLLQRPEQMAVLRDDPSRIGDAVEELLRYL  
TVVSTGLFRFAKEDVVLGDEHIPAGSTVVVSLMAANRDGRHWPEPETLDV  
TRVRSSHLAFGHGVHQCLGQQQLARIELTVGITELLCLRLPNVRLAVPPADV  
PLRNDMITYGVHRLPILWGTP

>CYP105CT1 (2562095433) *Salinispora arenicola* CNY486

MNSPNHMPADRSLTAPASGCPMALSRGRVGLDVADEVSELRDGGRLGRIT  
TAFGQEATLITRYDEVRAQMADSVVFNVAGVPSPPALVDGGFDTESVRRR  
RTVGNLIMLDPPEHTRLRRMVAAWFTTRRVERLRPRVVEIIDAALDEMER  
SGPPVDLVAMFAKTVPITVICELIGVPEELRERYRRRAERAVSASAVSTP  
LDELRLRLREAGWVSRELIEYHRENPSDDIIGMLLREHGTD SHDDGITDDE  
LVGLANALLIAGHETTTQMLSMGTLALLRHPDQLALLRDDPSIVAGAVEE  
LLRYVGVLHGGFVRVATRDTRLGGHRIHAGELVVPALTAANRDPRLTLDG  
DRLDITRPPTSHVAFGHGVHFCIGAPLARMELREAFPALLRRFPGLRLAV  
PDSELEFTQGT TVYSLRGLPVTW

>CYP154M5 (2562095450) *Salinispora arenicola* CNY486

VEQSCPYKLDVTGRDVHAEGEAI RARGPVAQVELPGGVQGW SVTGYQAAR  
QVLADPRFAKDPKKWPAYTSGAIPP NWPLIGWLLMDNMTTNDGADHQRLR  
KLVS HGFTPRQVERTRPLIVKIVNDLLDGLSSAGPDEVVDLKGRFATPLP  
ARVICDMFGVPEALRASVLRGAQVNV TSSISGEEAEANVEQWHRELLELV  
EAKREKPEDMASLLIAAKEEDGSTLTQEEVVGT LHLMLGAGSETLMNAL  
SYAVLGMLS NPGQYEMVRNGTSSWDDVIEETLRAQAPVAQLPLRYATEDV



AVGGAVIKAGDPVLMGFTAIGRDPVHGETAGDYDITREDKTHLSFGHGV  
HFCLGAPLARLELKIALPALFERFPNMTLAVRPDQLEPQGTIFIMNGHREL  
PVRLGQPATVLA

>CYP105W2 (2562095639) *Salinispora arenicola* CNY486

MTGYQDRPTGDQPGAPVPSGSTDPGIGAFPLPRRCFFSPPAEYARLRAEH  
PVVRLPMLGGDTAWVVSRRHADVRQVLSDFRMSADRRRPFGFPKFAPTTEGQ  
RQASFANFRPPLNWLDPPEHAICRRQIVDEFVSRRVRQSRALVERVVDTH  
LDALTAGAPGADLVSTFAYPVPSQVICEVLGVYPYGEHEFFERRSTLMFRR  
STPADERARYAREIRDFLDMVVTDKERRPGDDVLSRLLYRQRSAGGMDHE  
AVVSMAFVLLVAGHVTTSNMLALSVLALLTHPARLARLRAEPPERFPAAVE  
ELLRYFTVVEAATARTTTAEIMIGGVTTAAGEGVVALGQAANRDPRVFEH  
PDEFDPDRDARAHLAFGHGRHICPGQHLARLEMEVALSRLFRRLPGLRLT  
MEVSDLPLKEDSNIFGLYALPVAW

>CYP248A2 (2562095647) *Salinispora arenicola* CNY486

VLADAVTAFDPTAVDVRRDPYPSYHWLLRHDPVHRGAHQVWYVSRAFADVR  
AVLGDERFARTGIRRFWTDLVGPGLLSQIVGDIILFQDEPDHGRLRGVVG  
PAFSPSALRRLEPTIEATVNDLLRPARALGAMDVVADLAYPLALRAVLEL  
LGLPAGDANAVGRWSRAVGRTLDRGATAEDMRRGHAAIAEFADYVERALA  
ERREDGADLLALMLAAHRSQLMRNEIVSTVVTFFITGHETVASQLGNGL  
LSLLDHPEQLELVRRQPHLVPQAVEECLRFDPAVQSNTRQLAADVELHGR  
RLRRDDVVVVLAGAANRDPGRYDRPDELDIRRDVPVPSMSFGAGMRYCLGS  
YLARLQLRTALGAMVALPDLRLVCNPNELAYQPRTMFRGLTRLPVAFTPA  
G

>CYP247A7 (2562095938) *Salinispora arenicola* CNY486

VRLTPGAARDIDLDSVNLFDLDLYTSGDPHPIDVDMRAQSPLHHQVLADG  
REFWSVTRYDDVCRVLGDYREFTSERGTVVTHLGEDDIAAGKLLTSTDPP  
RHTQVRRRAIGAKLTARAVASWQDRIRDAIVRFLEPALDGDTFDLAEQALL  
LPAIVTGPLLGPIDRWQELVQLTAMVTAPSDPHFQHGSEAATLAISHHE  
LVTYVTEWVKQRRSAGGGDGSLLDHLMSVRVGGAPLTDEEIALDGYSILL  
GANVTTPTHTVSGTVLALIERPEQFEKAQADPSLLANLVEEGLRWTSACN  
FMRYALNDTRIGGGTVPAGGAVVAWIGSANRDESYFPDPHQFDITRSGAN  
RQVAFGFGPHYCIGAPLARMTLGIFFEELVQRFGSIELAGEPQHLSYFI  
AGMTHLPIVAQKRKTP

>CYP1051A1 (2562096399) *Salinispora arenicola* CNY486

MATDAPITRARTVPAWKALPAAVRDTHRALVDVGNWSDGDVVRVSLGVSR  
PYLVTNPAHVQEVLHERAAIYPRGDDTALWRSVRKLVGDGILAEGDAAWAA  
SRRVLAPMFRPARINAMVDTMADAIAGAVDDLHEAATAGTPIDVGRELSR  
IVCSAIMRVFFADRITVRDALRIMKAQETIVTAMAPRILAPLVPWWIPMP  
GDRRFRAAVRSIDDIILLPVLRLQAQRQPDDGDDLLSRLVRARADDGRALSE  
KRMRDDLVSMAVATTETSTVVLTWLWPLLANHPDVANRLYDEIDRVVGGG  
PVRGDHLAELTYTRMVLDELLRLYPAGWILPRRAATTDVLGGVRINKGAT  
VILSPYVTQRMTAWWGPTAEAFDPERFAAGREAADGRHRYAYYPFGVGMH  
RCLGEHLFNLEAILIVATLLSRFRFALTDTSMPGVKVAASRTPARTVEMI  
LKPVAVPVAPAR

>CYP208A12 (2515510476) *Salinispora arenicola* CNB527

MTLDTITPRVPLGPPRTAALRMLLVMKRDRLGMLTSAAARYGDASRLPVG  
HKALWFFNHPRYAKHVLADNSANYHKGIGLVHARRALGDGLLTSEGDLWR  
KQRKVIQPAFQSRRIAQQAGMIAEEAFALVERLRARAGVGPVELTAELTG  
LTLGVLGRSLLDADLAGFDSIGDSFATVQDQAMFELETNAVPMWIPLPR  
QIRFRARRRKLQAVVDTLVDGRAGSLADRVDVLSRLILSARGEADPRVGR  
ERLRDELVTLLLAGHETTASTLGWTLSLIDRHPGVWERLHAEAVEVLGDR  
LPEYDDLRLRLRYTVMVVEEAMRLFPPVWLLPRRALAPDTIGEYRVPANAD  
VVISPYTLHRHPEFWNPNERFDPERFAPGQAADRPRYAYLPFGAGPRFCV  
GNNLGMMEAVFVIALLCRHLRLTGVPGYRLVPEPMLSLRIRGGLPLVVRP  
VS

>CYP2296A2 (2515510766) *Salinispora arenicola* CNB527

MAVAPPVQGLTDGAIGSYLLAARGRQWIAGAADGRDPWSLILRGGDREAL  
IRRARDRGAVYHSPAGCWVVTETAPAAEILADPRMGLWYADPAGAMPD  
EVERPLLAHFLSLHRAFCADQAEYRRLPAWTEPVLGPETADHRAVRLTA  
ACRTVLSALPDHFDLVRDFARPCATAVLGELTGLSAAERVRLAEASAACA  
AVLDAVVCPPQRPVALGLRTGVERLRALFDAEGGGAAARARVLTAVAGVE  
MAAQLTVNVVLIADPRRRTAGVDSTGVGGLVEEVLRRDPPVRVEHRVA  
QADVTVAGQLVTAGSEVVVLIDAAANLDGGPDRQPLTVDDGLYTACVAPFA  
RATAEAAVTAALSLPVTWALAGEPVRRLRSPVTAAYAGVPIAAVSRAARR  
G

>CYP166A4 (2515510771) *Salinispora arenicola* CNB527

VTASAVGSLGEDYRPNELSADPYPPFYARARSEEPVFYAPAVDAYVATTQ  
DVRTVLADPETYSIAAVLRPLEQLAPEARAEIDGSVPVLPADHGDGDEA  
RRRAAEATRLAFARSSVDAQAEHLRSVVDALIDRFVMDGPGDVMSRLARA  
LPVHGKAKTLGIEPEDVPAVVEGSYSLTYLMSGANS�DQVQVQAAARRVA  
AYQRLLDRYVQRRHAEPRDDLVTAIVAAVTPQDGSFPVAARHTVIESLTG  
LIGAGQNTTAMIGTAVWQLLCHPGQLELLRQRPELTPAAVEELARFDMP  
LQGLFRQVTRPVRLGGKDI PVGARIMVLFASANRDEKVFDRPDELDITRK  
PKRHMSYGHGPRSCVGSYLARQLLQYTIGGLVTRIPGLAFAGPPEFVPGM  
HRIIHRLDVRW

>CYP173K1 (2515510787) *Salinispora arenicola* CNB527

VSIGTRTDLGDSFAPFTEQDMYPLYARARVEEPVFYTPALDAWVVTRYAD  
VRDVLGNPKAFSLATVPDSLAMLSPEAYAELAKTFAEVPVSIREDAVDEA  
RKRVRAPILRAFSDETVRDMQEFITGQVEQLIDRFADRGHAELEMAELARQ  
LPVRVKAPVIGIDPADIDEFVQGTYDFMELHSVAAQLPVELQVAKARRVV  
DYQRLLDSSYAQRRAEPRNDLFSELVAAMAPGSGPLTVPERKALVNAMTG  
LIAAGHFTTTTAMVGTGIYHLLHRRDQWELLCRRPDLDNAIEELARFDMP  
LRGLMRRTTKNVVVSVELPPGTEVMVAYQSANRDETTFPRADELDISRE  
PTDHFGYGFGRSVCVGAALGRSIFRTTLRSLSRRLPGLWLATDEVRYLPG  
LHVIVRELPSW

>CYP245A7 (2515511120) *Salinispora arenicola* CNB527

MPSATLPRFALTGWNRENIVNPYPVYQRYREVAPVHRGEPGGDAPDTFYV  
FSYDEVVQVLSSSCFGRGRSLDAAQASVPVPAEQKALRAIVENWLVFMDP  
PRHTELRSLLNRSFSPRIVTELPRPRIARIAQELLSRLGQQADVDLVESFA  
APLPILVISELLGIPEERRAWLRANAMALQEASSSRAGRDVEGYARAEVA  
AQEFTEYFREQVRLRRGSAGGDLITVLANAQERGAPVSLDAIVGTCVHLL  
TAGHETTTNSLAKAVLALREHPAVLDELRGADGLTTDAVEEFRLYDPPVQ  
AVTRWAHQDITLGGCDIPGRSRVVALLGSANRDPARFPLPDVLDVRRPAD

RHLSFGLGIHYCLGATLARAELEIGLQALLDGVPTLGYGTQHVDYADDLV  
FHGPSRLVLVNLGER

>CYP244A4 (2515511124) *Salinispora arenicola* CNB527

MSTTTNTELTEAPETNMPVDPGLFDCMPDLIAAARVAPVVRIPYLGRHAW  
VVCDELVLKQALTHPKMGKDITLVPEWMMRQFGLMVTAPDPEYARAMIMS  
DGENHARIRRIHAPVLSRPNTERWGERVADKVEGFLDELSQAGSGSTEVN  
VVTNYTHKIPLAFISEMLGLPPEAEHRLRGITDIMLYSSDYAARREAIGG  
LFGAVEDWVRNPADLRDGVITGLLAASDGPDAAVTEGEVIVWTLGMIITG  
YETTGSLLISTSLYEAIRPPHERPKTDEDITAWIEETLRVHPPFPHPHTWR  
FPLEDIELGGYLIPKGSVPQVSIAAAANKRPGEGADSFEAERRGHGHLSTG  
LGMHYCIGAPLVRLEAQIAVRGFLRRFPQARLSAESAVQWESEWMIRRMSS  
VLPVAVLS

>CYP211B2 (2515511360) *Salinispora arenicola* CNB527

MDVSEAVAVLTSPSGRLDPYPTYEQLEAHGVPVSRRTAGLFVVVTGYAEADM  
VLRDPRFVVLDDDLRDDVFPHWQDSPAIXSIARSMLRTNPPDHSRIRRLA  
AGAFTPRRVAAMREVVTAPADELVDEMIRAGRDGARVDFMDMFAYPLPVA  
VICALLGVPAADRSRFRRWAGDLTGILEPEITPEELAGADAGADELRDYF  
TGLIEQRRRAPADDLTALVQAHDADGDRLSGEELLANLVLLVAGFETT  
TNLLGNGLVLLTRPEAAAAALRDQPDLAGPYVDELLRYDSPVQLTTRTVR  
DSVSFAGTELPAGSWLLVLLGAANRDPFRFPDPARFDPWRAQSQPLSFGA  
GPHYCLGAGLARLEAQVAFPLLLRRLPELALAGRPSRRTRLTLRGYETLP  
VTVGAVTADRGTPAGVAPGTP

>CYP166A4 (2515511806) *Salinispora arenicola* CNB527

MTDAISFELPWARTDKFDPPAVFDALREQRPLARMRYPDGHIGWIVSSYE  
LVREVLGDPRFSHSCAVGHFPVTHQGQVIPTHPQIPGMFIHMDPPEHTRY  
RRLLTGEFTVRRTSRLTGHEGVAAEQIEVMREHGAPADLVATFARPLVL  
RVLSGLVGLPYGERDRYLHAVTLLHDAEADPAEAAAAAYEQAGAYFAEVIE  
RRRRQPEDDLISTLVGDGELTGEELRNIVTLLLFAGYETTESALAVGMFA  
LLHHEDQLARLRADPTKIDAAIEELLRYLTVNQYHTYRTASEDIELHGEV  
INKGDSVTVSLPAANRDPARFACPADLDIDRETSGHVAFGFGIHCCLGQN  
LARVELRAGLSALLRAFPNLRALVPADEVPLRLQGSVFVAVKNLPVCW

>CYP105BL2 (2515512120) *Salinispora arenicola* CNB527

MSSHAAAPDPETATPLHTLAPELTFPQFERSTPFDPPQAYTELSGRCPV  
APVMSDGGKPSWLITSFEGVRTTSLDPRFSSDMSHPGFNRTGKPVDDL  
KDTLGAMDGERHRYRRLMTGELTVRRAKAMRPVITQITDEALDQLAAAG  
PGADLVKHVAFVVPSPRVAYHLVGIPSSDYELFTGMATTLMDSTSSADQFA  
ALQNMVSYFDTLVTDREHHDRDDLGRMVRRYLATGELTRDMLITLAWTT  
LAAGQETTAHMIGLGVAALLRHPDQLELLRREPHLLPGAVDELMRYLPMI  
QFGIPRVAMDDVKVDGQTVTAGEGVVALPPLANRDPVFERPDELDVRRN  
ARQHLLTFGYGPHQCPAHALARLELEVYGRLLERFPTLRLADSDADLKVQ  
DEDIMYRVSELAVTW

>CYP1005A1 (2515512714) *Salinispora arenicola* CNB527

VSAVLFRSWTKTAGTRWPDVTRVADQSGTEHLVVTRHALVRQVLTDQATY  
RPDNALAEAVTPVPVAALRVLAGHRFRLPPTLANNGGVSHPAIRALVADAL  
HPTKVAAQRPWLTTELVA DRVATIRTTLDSSGGPVDLYADLTADLPLLVLAR

LVELPDAPVNAVVKQFARAALFWAPLDADRQLALADEVGRFHQVLRFA  
DTGGGLAAALRATGHPPDVLVGALFFLLVAGQETTSQFLTLHRLTGEP  
TIRAALRAGSISVADVVEEGLRLEPPIVWRRVAVDSTLGGTTVAAGTS  
VLLWLRAGRDPVVAAPDEFRRPGQRGSRRLAFGAGAHRCGLGDQLARME  
ATVVVEQATPLLDGVTVVRPPWYPDNLTFRMPDAFVVR

>CYP105CT1 (2515512784) *Salinispora arenicola* CNB527

MNSPNHMPADSSSTAPARGCPMALSRGRVGLDVTDEISELRDGGRLGRIT  
TAFGQEATLITRYDEVRAQMADSAVFNAGVPSPPVLVDGGFDTSVRRR  
RTVGNLIMLDPPEHTRLRRMVAAWFTTRRVERLRPRVVEIINAALDEMER  
NGPPVDLVAMFAKTVPIITVICELIGVPEELRERYRRRAERAASASAVSTP  
LDELRLREAGWVSRELIEYHRKNPSDDIIGMLLREHGADSHDDGITDDE  
LVGLANALLIAGHETTTQMLSMGTLALLRHPDQLALLRDDPSIVAGAVEE  
LLRYVGV LHGGFVRVATRDTRLGGHRIHAGELVVPALTAANRDPRLTLDG  
DRLDITRPPTSHVAFGHGVHFCIGAPLARMELREAFPALLRRFPGLRLAV  
PDSELEFTQGTTVYSLRGLPVTW

>CYP154M5 (2515512800) *Salinispora arenicola* CNB527

VEQSCPYKLDVTGRDIHAEGEAIARARGPVAQVELPGGVQGSVTGYQAAR  
QVLADPRFAKDPQKWPAITSGAIPPTWPLIGWLLMDNMTTNDGADHQRRL  
KLVSHGFTPRQVERTPLIVKIVNDLLDGLSTAGPDEVVDLKGRFATPLP  
ARVICDMFGVPEALRASVLRGAQVNVTSISGEEAEANVEQWHRELLELV  
EAKREKPDMDASLLIAAKEEDGSTLSQEEVVGTLHMLGAGSETLMNAL  
SYAVLGMLSNPGQYEMVRNGTSSWDDVIEETLRAQAPVAQLPLRYATEDV  
AVGGAVIKAGDPVLMGFTAIGRDPVHGETAGDYDITRADKTHLSFGHGV  
HFCLGAPLARLELKIALPALFERFPNMTLAVRPNQLEPQGTTFIMNGHREL  
PVRLGQPATVLA

>CYP211C1 (2515512995) *Salinispora arenicola* CNB527

VVDVEGLLARLYSAQGRQDPFPVYADLHAQGPIAALPPEPERRRVAAVAV  
GYDLVGAVLRDPEWSKAPPPGWTEQEILRTLQTSMMFINPPDHGRMRHVF  
AGTFTPRRLGALEPVVNRVADELDRMADAGAGGLDFVAEFAYPLPARVM  
AEFIGIPETELDWYRERVDVIDAFLDVAGKTPQRLAAANAAGAELEAFY  
ELLAHRRRTPGEDLISGLVEAVDAGGVALTEDELISNLIVLFNASFVTTV  
YMLSNGLPVLLAHPEVAAALATDPVLTAGAVDEILRLQAPVHLLARAAPR  
DTVLGGVPIPOGQNVLLLIAAANRDPAHFPDPDRFDPRRSGLAFGLG  
LHYCLGAASVRLLEGRLALPRLLSRFPRLRIMEQPVYSGSLFLRGIDKLSV  
SPGEGSTRE

>CYP125A41 (2515513262) *Salinispora arenicola* CNB527

MTEPRIPAGFDFTDPEVLAHRVPREEFAELRRTAPVWWNAQPRGSAGFDD  
DGYWVVTRYADVMTVSRSDTYSTRENTAIARLRPDTTREDIEMQRVIML  
NVDPPHETKLRAIVSRGFTPRAINALRGSLAERAHIVRDAAVRGVGDV  
TDVACELPLQAIAGELIGVPQHRRKVFWDWSNQLIGYDDPAYGTDPLTASA  
ELLAYAMEMAERQSPSDDLVTKLVAQIDGHELTDEFGFFVMLLAVA  
GNETTRNAITHGMVAFLDNPEQWELFKAERPKSAVEEIIIRWATPVNVFQR  
TALVDTVLGGQAIASAGQRVALFYGSANFDEAVFEDPERFDITRSPNPHLG  
FGGSGAHFCLGANLARLEIELIFNSIADHLDIRKVAAPQRLRSGWINGI  
RQMPVRYR

>CYP105CP2 (2515513525) *Salinispora arenicola* CNB527

MTKSMPVQDLPAFPPIPRECYPYRPSAQHVSLRSGGPMARVRLYNGRTAWLV  
TDSA HARAVLS DYRRVSIKPYHGNYPLLN EEF EKVVDSGYADVLFGVDP  
EHTRQRQMIMPSFTLRRTAVLRPDIQRIVNDKLD EMMRHGAPGDLVTEFA  
QPVP SPMVS FLLGVPWEDHEEFETPAHKLFVPELAEEATTEL GAYLERLI  
QKKEQPGGTPGGTGLLDD LIRDHLRAGALS RDELVHIAMAMLVAGTDTT  
NVISLGLTALLDNPDQWAALRDN PDELIPGAVEEILRYTSLIEAFARVAV  
SDIELNGAVIKEGEGILISSAGVNFDPALAPDPGRFDIRRP RPSPFSFSH  
GIHRC PGDNLARLELEIAFRSLVTRMPNLRTAKPIDQIPSNNDGTLQRL  
YELPVVW

>CYP105CN1 (2515513527) *Salinispora arenicola* CNB527

MAAPAPQATQSTTPHPPSYPLPRECYPYRPSAGTARLRDAGPVSTVRLYDG  
RTAWLV TGAAEARALLADSRVSNRADFPNYPVM DERHLSMRATREMAREE  
EGGFAAALFGMDPPEHTRQRQ LLLPRFTVRQVAARRPAIQ RIVDEHLDAM  
EANGSPADLVSAFATPVPTMVVCTHLGVPYQDRTRFEP AVAGLFEPDRAD  
AAMAELTAYLHQ LIETKQSEPGDGVIDHLIANHLRPGAIDRAELVAIASA  
ILVAGTVTTSSAIALGTLALLTAPGQYAALVDNPD LVP GAVNEILRYLSL  
VEQLARVATEDIEIGGKLIRAGDGIIVSFAAGNLDPNV TTHPDRLDVALP  
PTNH LAFSHGIHHCIGQNLALLELDIAFRALVSRFPTLRLAVPAEQ LPTY  
FAGDVPRLACL PVTW

>CYP107FS2 (2515513528) *Salinispora arenicola* CNB527

MPVPQGEQNLTTTEVFADPKALFATLGS RQPLHRISLPDGM PAVLVTGYRE  
ARQALSDPRLVRSITAAAPELHKYHPLASDDYALSRHMLFADPPDHGRMR  
KLVSTAFTRRRVEQMRPRIQQITDD LIDVVAAKGEADLVEALALPLPIAV  
ISEMLGVPFADRSEFERHAEVLTGINASSGFDAIIAAGRWFDEYLAGLVQ  
QRRREPQDDLISGMLAAQDKGDR L TDVELRSNALLLSAGFETTVNLVAN  
GLLALLRHPEAMAALRSEPNLMTTAVDELLRYDSPVSCVTYHFAREPVEI  
GGFEIRSGEHVVIAAAAANHDPTVFADPSRLDLRREGSGQILSF SHGIHF  
CLGAPLARLEGEIAFGTVLRRLAGLRLAVPTDSL VWKASFVLHRLERLPV  
MFTPDRDPNPIDSVHTV

>CYP107AY14 (2515513934) *Salinispora arenicola* CNB527

MKAELTPIPRSGARLGQEYDQLRK TG DVHQVLLPDASLAWLV TNPEVAAR  
ALADPRLALNRRNSRGGWSGFALPPALDANLLNLDAPDHTRLRRLVGP AF  
SPQRVAGLRPGIRRAAEHL LDTLVATSRPTDLVTGYCNPLSVQVIADLMG  
VPDAGR TNLRAWTDMLTSYPPDRDAIRQAVTELHG YVVDLIDLKQQQPG  
DDL SVLV TIEQDGDRLRDELTS LAFLILFAGYENTANLIASAVLWLLD  
HGGLNEVP IAEAI EGTLRDEPPAPVAIRRFPTEDIIIRGLTIPAGDTVLL  
SIAAATRGADGNAARLAFGNGPHYCLGAALARVEAEEALTVLARRLPGLT  
LAVPPAQVRWRPTFRTHGPAELLVGW

>CYP107EU2 (2515514206) *Salinispora arenicola* CNB527

VTVGQTL PDLVYSPEFTRDPYAVFARLREQAPVCRVTTHRGMSAWMVTRY  
ADVRALLADSR LAKDGNRIGELMPRH SKLTGAATGFPPGLTTNMVNSDPP  
DHTRLRHLVGREFTGHRVESLRPRIEEIVDDLLDGVAACGDEADLAEILS  
RRLPIAVIGELLGVPEADRAEFFRWADTLYGGTASPEALGQAYNAIVDYL  
GRLCDAKRDPADDLLTALVQVSADEDRLSREELVSMALLLVAGHETTS  
KQISNGVLALLLNPEQLKLLKAQPALAA GAVEELLRFEGPSLSASLRFTT  
EPVEVAGVVIPEGEFVLLSLASGNRDPQKFPDPDRLDITRSTQGNLAMGH  
GIHHC VGAALARLELEIVLSRLVARFPQLQLAVAADDLEWL VNSFFRAPL  
HLPVSLGR

>CYP248A2 (2515514271) *Salinispora arenicola* CNB527

VLADAVTAFDPTAVDVRRDPYPSYHWLLRHDPVHRGAHQVWYVSRFADVR  
AVLGDERFARDGIRRFWTDLVGPGLLSQIVGDIILFQDEPDHGRLRGVVG  
PAFSPSALRRLEPTIEATVNDLLRPARALGAMDVVADLAYPLALRAVLGL  
LGLPAGNADAVGRWSRAVGRTLDRGATAEDMRRGHVAIAEFADYVERALA  
ERREDGADLLALMLAAHRSQMSRNEIVSTVVTFIFTGHETVASQLGNGL  
LSLLDHPEQLELVRRQPHLVSQAVEECLRFDPVQSNTRQLAADVELHGR  
RLRRDDVVVVLAGAANRDPGRYDRPDEFDIRRDPVPSMSFGTGMRYCLGS  
YLARLQLRTALGAMAALPDLRLVCSPNELAYQPRTMFRGLTRLPAFTPA  
G

>CYP105W3 (2515514279) *Salinispora arenicola* CNB527

MTGYQDPPTGDQPGAPVPSGSTDPGLDAFFPLPRRCPPSPPAEYARLRAEH  
PVVRLPMLGGDTAWVVSRAHADVRLGDPMSADRRRPFGFPKFAPTTEGQ  
RQASFANFRPPLNWMPPPEHAICRRQIVDEFSAARRVRQLRTLVERVDDAH  
LDALAAAAPGADLVSTFAYPVPSQVICEVLGVYPYGEHGFERRSTLMFRR  
STPADERARCAREIREFLDVVVTDKERRPGDDVLSRLLYRQRSAGGVDHE  
AVVSMAFVLLVAGHVTTSNMLALSVLALLTHPARLARLRAEPKRFPAAVE  
ELLRYFTVVEAATARTATAEVTIGGVTTAAGEGVVALGQAANRDPRVFEH  
PDEFDPDRDARAHAFGHGRHICPGQHLARLEMEVALSRLFRRLPGLRLT  
MKVSDLPLKEDSNIFGLYALPVAW

>CYP107Q4 (2515514528) *Salinispora arenicola* CNB527

MTTTAETS AETIDLFSPEVVADPFGWYARLREETGPTTGTLNIGTMMGGP  
EMWLVTTRYEDVRQVLTDPRLTNPPADSPLEDIRAGVFKRLDFPPDLIPW  
MANLLNVSDGEDHTRLRLKLVSYALTAHRIGKLRPRVEKITADLLDKLAED  
GKDGSPVDLVEEYCYPLPVTVICELVGIDEPDRAHWRAWGDSMATMNGER  
IPTTLVKCIELARELIEKRRAEPQDDLVTALVQAQAEQDNRVSDDEIIGI  
LFSLVTAGHQTTTYLIGNSVILLLENPDQLARLKENPSMWPQAVRELQRL  
GPIQFAQPRFPSEDIELGGVTIPRGAPVAPLLLAANTDPRRFPDPNKLI  
DRLAVGSESHLGFKGKGIHRCLGQHLAYQEAQVALQGLFTRFPDLSLAVPR  
EEIPWILRPGFTRTRTLPLKLV

>CYP105G7 (2515514529) *Salinispora arenicola* CNB527

LTITETTETPPADDTLRAPLPRQFMQRDDPSKLPPALAAAEQAPVGRSTL  
PDGDPFWMVSGYDEARAVLSDFRFSDDFRYHPRFKKISGQLGERLRNDK  
ARAGSFINMDPPEHTRYRKLLTGQFTVRRMRQLTVRIEQIVTEQLDVMLA  
KNSADLVSAFAVPVPSLMICELLGVRYEDRTEFQRRRAAGLLQTDLPKQ  
AVENLEAQRAFMQRLVTDKRRNPADDMISGLVHHAGADPPLTDDELVGIA  
TLLLLFAGLDTTASMLGLGMFMLLQRPEQMAVLRDDPPRIGDAVEELLRYL  
TVVSAGLFRFAKEDVVLGDEHIPAGSTVVVSLMAANRDGRHWPEPETLDV  
TRVRSSHLAFGHGVHQCLGQQARIELTVGITELLRRLPNVRLAVPPADV  
PLRNDMITYGVHRLPIRWDTF

>CYP1051A4 (2515514555) *Salinispora arenicola* CNB527

MATDAAITRARTVPAWKALPAAVRDTHRALVDVGNWSDGDVVRVSLGVSR  
PYLVTNPAHVQEVLHERAATYPRGDDTALWRSVRKLVGDGILAEQDAWAA  
SRRVLAPMFRPVRINAMVDTMADAIAGAVDDLHGAAGVAGTPIVGVRELSR  
IVCSAIMRVFFADRITVQDALRIMKAQETIVTAMAPRILAPLVPWWIPMP  
GDRRFRTAVRSIDILLPVLRLQAQRQPDGDDLLSRLVRARADDGQVLSE  
KMRDDLVSMVAVTETSTVVLTWLWPLLANHPDVADRLYDEIDRVVGGG

PVRGDHLAELTYTRMVLDLRLYPAGWILPRRAAATDVLGGVRINKGAT  
VILSPYVTQRMATAWWGPTAEAFDPERFVAGREAADGRHRYAYYPFGVGMH  
RCLGEHLFNLEAILIVATLLSRFRFALTDTSMPGVKVAASSTRPARTVEMI  
LKPVAIPAR

>CYP105AB35 (2515515124) *Salinispora arenicola* CNB527

MTETASSRLTDTEFPVQRQCPFAEPVEYEQIREQSSIAMVRLTGGGEAWW  
ISGHEQGRAVLADRRFSSDRKANFPFISTDPATRKRLYAQPLSMISMDG  
AEHAQARRALIGEFTVRRRLAALRPRIQQIVDQCIDEMLTDDQHCVDLVKA  
LSLPVPSLVICELLGVYDDHDFQEHATLVRNTAPEVRQHSIDELNA  
YLGALIDRKLADPDDDLGRQIARQHQDGTFRSSIVSLAFLLLVAGHET  
TANMISLGVVGLLQHPDQLTMKNDPDKMPLAIEELLRFFTIVDSVTSRV  
ATEDVRLGDTTINAGDGVVVSGLSADWDPTVFADPDRLDLERGARRHHIAF  
GFGPHQCIGQNLARLELQIVFDTLFRRIPTLRLAASLDKIPFKTDAAIYG  
ARELPVAW

>CYP105EJ1 (2515515170) *Salinispora arenicola* CNB527

MAGVNSDLPSFPMARRCPHHPPEYAEMRARGAAVRVNFLGTPVWAITRH  
AEARDLLTDSRVSTDPASPGHPFGALAATAERMAGQLTMDPPEHSAHRR  
MLISEFGVRRVREMRPAIERSVDDLLDGMAGAAADLVEAYGLPLASAIM  
CQLLGVPERDHAFHFDACAMLGCVFSSRDADVARMEMLAYLDDLVRGKH  
PGQDGVDRLLTIRHDTGEPTHEAIVGMCFMILLAGHHTTATMIPLGVHT  
LLDHPDQLAQLRAEPALWPAAVDELLRFHSIVDWMSFDRVATADIDVGDE  
RIHAGEGIFVLGAAANRDERAFERSDDFNHRRSRHHLAFGVGIHQCLGQ  
SLARTDLEISYRRLFDRFPRIRIHAPAAGLSFKYDAAMFGLQELPVTW

>CYP105CH2 (2515515726) *Salinispora arenicola* CNB527

VSSLPLPTYPKLRDPADPLLPADYLAIQSEKPIAKVLLPSGRPTWLITG  
HALARQVLTEPCVSVDKHPNFPYPVPNPDAVVAQVARWTYILLGDDPPL  
HTERRRLLISEFSVRQAQAMRPRIQQLVDFHLDQLIAAGPGADFSKHFAM  
KVPSAVICEMLGVPFADHDYFQERTALQLRRDVAVADQKQAIDELLAYFE  
QLIQRKSSHPGDDLLSRLIVSNRETEAFDHEALVALGLLLLLVGGHETTAN  
TLTLATATMLERPEVAEQLRTDPSLMPSAVEEFLRYFSVAVAVSRIATVD  
LQVGDLVRAGESMLLVNLTARDGTVFPEPHRLDIHRNARNHLAFSHGI  
HQCMGQNLARVEMQIALDVTLLRRLPGLHLVTPFEELPFKYRHLVWGIEEL  
KVAW

>CYP107AX1 (2515515857) *Salinispora arenicola* CNB527

MTSRPTAVFDQCLLRDPHSRYNALRDQAPVHHVLTDPGAPAWLVTRYNDV  
RAAFTDPRLSVDKRFSGTDGEHGSSLPPELDAHLLNRDPPDHTRLRLRLAA  
AAFTPRRVADLHPAVERIVSTLLDGLAGHDRAELIGSLASPLPLQVMHEL  
LGLPTQANIDFRTWTNTLLSADANQPAQSRAAMANMRRFLIEQLAHKRAQ  
PGDDLLTGLLAAREDDRLTDDELVAMVFLLMFAGYDNTAALIGTVTHSL  
LTNAELHEAVRGSLALDELIDEVLRWNPAFPLAVRRFAQEPITIAQT  
PAGDRIWLCLASANRDPAQFTQPDDELGIVGLRRPHLSFGHGIHYCLGAPL  
ARLQTTIAVTSLLNRFPPEMRLAVPAHDIRWRESFRLRGLIALPVYL

>CYP1198B2 (2515515874) *Salinispora arenicola* CNB527

MSGELTDQRAAPDVGGNPLRSLLDHGIRANPYPLFGELREAGPTAVEDGS  
VVLFGGEYEHCSQILRHRDMGSDTSEAPSIKGFVVDDAERAGSSIFFMDQP

GHGRQKRLVSKSFTPRIVQSFGPQITRIVDGLFEDFQDKGELDVVTDLAY  
PVSIGIICDLFGIPDDERDMLKEWSDDLALSTELPTLGAAIGVLNVFTRD  
EINRFGSVAMAAHAYFADLIHRRRKPNPGDDLVSLLATESNGERLTRFEV  
TSVLATLFVAAHESTTNLISGGILALLRNQDQMTVLRENPGVITNVVDES  
LRYDPPVHLAARMARARTTIGGYDLDPGSIVVVLMAAGNRDPRAYENPDV  
FDVNRKIKNVSLAFGAGAHFCIGSGLAKLEAEIAISAFQQLLKNPEVDES  
SLEYRRHIVVRGLEHMKVSFQP

>CYP208A12 (641270080) *Salinispora arenicola* CNS-205

MTLDTITPRVPLGPRTAALRMLLVMKRDRLGMLSSAAARYGDASRLPVG  
HKALWFFNHPRYAKHVLADNSANYHKGIGLVHARRALGDGLLTSEGDLWR  
KQRKVIQPAFQSRRIAQQAGMIAEEAFALVERLRARAGAGPVELTAEITG  
LTLGVLGRSLLDADLAGFDSIGDSFATVQDQAMFELETNAVPMWIPLPR  
QIRFRARRRKLQAVVDTLVDGRAGNLADRVDVLSRLILSARGEADPRVGR  
ERLRDELVTLLLAGHETTASTLGWTLSLIDRHPGVWERLHAEAVEVLGDR  
LPEYDDLRLRLRYTVMVVEEAMRLFPPVWLLPRRALAPDTIGEYRVPANAD  
VVISPYTLHRHPEFWPNPERFDPERFAPGQAADRPRYAYLPFGAGPRFCV  
GNNLGMMEAVFVIALLCRHLRLTGVPGYRLVPEPMLSLRIRGGLPLVVRP  
VS

>CYP166A4 (641270760) *Salinispora arenicola* CNS-205

MTDAISFELPWARTDKFDPPAVFDALREQRPLARMRYPDGHVGVIVSSYE  
LVREVLGDPRFHSCHCAVGHFPVTHQGQVIPTHPQIPGMFIHMDPPEHTRY  
RRLLTGEFTVRRTSRLTGHEVEGVATEQIEVMREHGAPADLVATFARPLVL  
RVLSGLVGLPYGERDRYLHAVTLLHDAEADPAEAAAAYEQAGAYFDEVIE  
RRRRQPEDDLISTLVGDGELTGEELRNIVTLLLFAGYETTESALAVGMFA  
LLYHEDQLARLRADPTKIDAAIEELLRYLTVNQYHTYRTASEDIELHGEV  
INKGDSVTVSLPAANRDPARFACPAELDIDRETSGHVAFGFGIHCCLGQN  
LARVELRAGLSALLRAFPNRLAVPADEVPLRLQGSVFAVKNLPVCW

>CYP107Q4 (641270774) *Salinispora arenicola* CNS-205

MTTTAETS AETIDLFSPEVVADPFGWYARLREETGPTTGTLNIGTMMGGP  
EMWLVTTRYEDVRQVLTDPFRFLTNPADSPLEDIRAGVFKRLDFPPDLIPW  
MANLLNVSDGEDHTRLRLKLVSYALTAHRIGKLRPRVEKITADLLDKLAED  
GKDGSPVDLVEEYCYPLPVTVICELVGIDEPRPHWRAGDSMATMNGER  
IPTTLVKCIELARELIAKRAEPQDDLVTALVQAQAEQDNRVSDDEIIGI  
LFSLVTAGHQTTTYLIGNSVILLLENPDQLARLKENPSMWPQAVRELQRL  
GPIQFAQPRFPSEDIELGGVTIPRGAPVAPLLLAANTDPRRFPDPNKLI  
DRLAVGSEHGLGFGKGIHRCLGQHAYQEAEEVALQGLFTRFPDLSLAVPR  
EEIPWILRPGFTRTRTLPLKLV

>CYP105G5 (641270775) *Salinispora arenicola* CNS-205

MTIETTETTPADDSLRAPLPRQFMQRDDPSKLPALAAALAEQSPVGRSTL  
PDGDPFWMVSGYDEARAVLSDPRFSSDRFRYHPRFKKLSGQLGERLRNDK  
ARAGSFINMDPPEHTRYRKLLTGQFTVRRMRQLTVRIEQIVTEQVDVMLA  
EGNSADLVSAFAVPVPSLMICELLGVRYEDRTEFQRRAGLLQTDLPKQ  
AVENLEAQRAFMQRLVTDKRRTPADDMISGLVHHAGAEPPLTDEDELVGIA  
TLLLLFAGLDTTASMLGLGMFMILLQRPEQMAVLRDDPSRIGDAVEELLRYL  
TVVSTGLFRFAKEDVVLGDEHIPAGSTVVVSLMAANRDGRHWPEPETLDV  
TRVRSSHLAFGHGVHQCLGQQLARIELTVGITELLRRLPNVRLAVPPADV  
PLRNDMITYGVHRLPILWDTF



>CYP1051A1 (641270799) *Salinispora arenicola* CNS-205

MPAWKALPAAVRDTTHRAFDVGNWSDGDVVRVSLGVSRPYLVTNPAHVQE  
VLHERAAIYPRGDDTALWRSVRKLVGDGILAEGDAAASRRVLAPMFRPA  
RINAMVDTMADAIAGAIDDLHGAATAGTPIDVGRELSRIVCSAIMRVFFA  
DRITVRDALRIMKAQETIVTAMAPRILAPLVPWWIPMPGDRRFRAAVRSI  
DDILLPVLRLQAQRQPDDGDDLLSRLVHARADDGRALSEKMRDDLVSMVA  
VTTETSTVVLTWLWPLLANHPDVANRLYDEIDRVVGGGPVRGDHLAELTY  
TRMVLDELLRLYPAGWILPRRAATDILGGVRINKGATVILSPYVTQRM  
TAWWGPTAEAFDPERFAAGREAADGRHRYAAYPFVGMHRCLGEHLFNLEA  
ILIVATLLSRFRFALTDTSMPGVKVAASTRPARTVEVILKPVAPVPAR

>CYP1005A1 (641271027) *Salinispora arenicola* CNS-205

MSAVLFRSWTKTADTRWPDVTRVADQSGTEHLVVTRHALVRQVLTQATY  
RPDNAMEAVTPVPVAALRVLAGHRFRLPPTLANNGGVSHPAIRALVADAL  
HPTKVAAQRPWLTGLVADRVASIRTTLDSGGPVDLYADLTADLPLLVLAR  
LVLELPDAPVNAVVKQFARAALFWAPLDADRQLALADEVGRFHQVLRFA  
DTGGGLAAALRATGHSPDVLVGALFFLLVAGQETTSQFLTLLHRLSGEP  
TIRAALRAGSISVADVVEEGLRLEPPIVWRRVAAVDSTLGGTTVAAGTS  
VLLWLARAGRDPVVAAPDEFPRPGQRGRRLAFAGAHRCCLGDQLARME  
AAVVVEQATPLLDGVTVVRPPWYPDNLTFRMPDAFVVRR

>CYP211B2 (641271361) *Salinispora arenicola* CNS-205

MDVSEAI AVLISPSGRLDPYPTYEQ LRAHG PVSRTTAGLFVVTGYAEADM  
VLRDPRFVVLDDDLRDDVFPHWQDSPAIKSIARSMLRTNPPDHSRIRRLA  
AGAFTPRRVAAMREVVTAQADELVDEMIRAGRDGARVDFMDMFAYPLPVA  
VICALLGVPAADRSRFRRWAGDLTGILEPEITPEELAGADAGADELRDYF  
TGLIEQRRRAPADDLTALVQAHDADGDRLSGEELLANLVVLLVAGFETT  
TNLLGNGLVVLTRPEAAAAALRDEPD LAPGYVDELLRYDSPVQLTTRTVR  
ESVSFAGTELPADSWLLVLLGAANRDPRRFPDPARFDPGRAQSQPLSFGA  
GPHYCLGAGLARLEAQVAFPLLLRRLPELALAGRPSRRRLTLRGYETLP  
ITVGAVTADRGT PAGVAPGTP

>CYP105W2 (641271514) *Salinispora arenicola* CNS-205

MTGYQDRPTGDQPGAPVPSGSTDPGIGAFPLPRRCFPSPPAEYARLRAEH  
PVVRLPMLGGDTAWVVS RHADVRQVLSDFRMSADRRRP GF PKFAPTTEGQ  
RQASFANFRPPLNWLDPPEHAICRRQIVDEF SVRRVRQSRALVERVVDTH  
LDALTAAPGADLVSTFAYPVPSQV ICEVLGVYPYGEHEFFERRSTLMFRR  
STPADERARCAREIRD FLDVVVTDKERRPGDDVLSRLLYRQRRAGGVDHE  
AVVSMAFVLLVAGHVTTSNMLALSVLALLTHPARLARLRAEPERFPAAVE  
ELLRYFTVVEAATARTTTAEVTIGGV TIAAGEGVVALGQAANRDP RVFEH  
PDEFDPDRDARAH LAFGHGRHICPGQHLARLEMEVALSRLFRRLPGLRLT  
MEVSDLPLKEDSNIFGLYALPVAW

>CYP248A2 (641271522) *Salinispora arenicola* CNS-205

MLADAVTAFDPTAVDVRRDPYPSYHWLLRHDPVHRGAHQVWYVSRFADVR  
AVLGDERFARTGIRRFWTDLVGPGLLSQIVGDIILFQDEPDHGRLRGVVG  
PAFSPSALRRLEPTIEATVNDLLRPARALGAMDVVADLAYPLALRAVLEL  
LGLPAGDANTVGRWSRAVGRTLDRGATAEDMRRGHAAIAEFADYVERVLA  
ERREDGADLLALMLAAHRSQ LMSRNEIVSTVVTFFITGHETVASQLGNGL  
LSLLDHPEQMELMRQP HLLPHAVEECLRFDPVQSNTROLAADVELHGR  
RLRRDDVVVVLAGAANRDPGRYDRPDELDIRRDPVPSMSFGAGMRYCLGS  
YLARLQLRTALGAMVALPDLRLVCSPNELAYQPRTMFRGLTRLPVAFTPA

>CYP107FS2 (641271587) *Salinispora arenicola* CNS-205

MPVPQGEQNLTTTEVFADPKALFATLGSRQPLHRISLPDGMFAVLVTGNRE  
 ARQALSDPRLVRSITAAAPELHKYHPLASDDYALSRHMLFADPPDHGRMR  
 KLVSTAFTRRRVEQMRPRIQQITDDLIDVIAAKGEADLVETLALPLPIAV  
 ISEMLGVFFADRSEFERHAEVLTGINASSGFDATIAAGRWFDEYLAELVQ  
 QRRREPQDDLISGMLAAQDKGDRITDVELRSNALLLSAGFETTVNLVAN  
 GLLALLRHPEAMAAALRSEPNLMTTAVDELLRYDSPVSCVTYHFAQEPVEI  
 GGFEIRSGEHVVIAAAAAANHDPTVFADPSRLDLRREGSGQILSFSGIHF  
 CLGAPLARLEGEIAFGTVLRRLAGRLAVPTDSLWVKASFVLRHRLERLPV  
 TFTPDRAPNPIDSVHTV

>CYP105CN1 (641271588) *Salinispora arenicola* CNS-205

MAAPAPQATQSTTPHPPSYPLPRECPYRPSAGTARLRDAGPVSTVRLYDG  
 RTAWLVGTGAEEARALLADSRVSNRADFPNYPVMDEHLSMRATREMAREE  
 EGGFAAALFGMDPPEHTRQORQLLPRFTVRQVAARRPAIQRIVDEHLDAM  
 EANGSPADLVSAFATPVPTMVVCTHLGVYPYQDRTRFEPVAVAGLFEPDRAD  
 AAMAELTAYLHQLIETKQSEPGDGVIDHLIANHLRPGAIDRAELVAIASA  
 ILVAGTVTTSSAIALGLTALLTAPGQYAALVDNPDLPVPGAVNEILRYLSL  
 VEQLARVATEDIEIGGKLIRAGDGIIVSFAAGNLDPNVTTHPDRLDVALP  
 PTNHAFSGIHHHCIGQNALLLELDIAFRALVSRFPTLRLAVPAEQLPY  
 FAGDVPRACLPLVTW

>CYP105CP2 (641271590) *Salinispora arenicola* CNS-205

MTKSMVPQDLPAFPIPRECPYRPSAQHVSLRSGGPMKVRVLYNGRTAWLV  
 TDSAHAARAVLSDYRRVSIKPYHGNYPILLNEEFKVVDSGYADVLFVGDPP  
 EHTRQORQMIMPSFTLRRTAVLRPDIQIRIVDEKLDEMRRHGAPGDLVTEFA  
 QPVPSMVMFSLLGVFWEDHEEFETPAHKLFPVPELAEAEATELGAYLERLI  
 QKKEQPGGTGGTGLLDDLRDHLRAGALSRLDELVHIAMAMLVAGTDTT  
 NVISLGLTALLDNPDQWAALRDNPDDELIPGAVEEILRYTSLIEAFARVAV  
 SDIELNGAVIKEGEGILISSAGVNFDPALAPDPGRFDIRPPRPSFSFSH  
 GIHRCPGDNLARLELEIAFRSLVTRMPNLRRTAKPIDQIPSNNDGTLQRL  
 YELPVVW

>CYP244A4 (641271805) *Salinispora arenicola* CNS-205

MSTTTNTELTEAPETNMPVDPGLFDCMPDLIAAARVAPVVRIPYLGRHAW  
 VVCDRELVKQALTHPKMGKDIALVPEWMRQPGLMVTAQPDPEYARAMIMS  
 DGENHARIRRIHAPVLSRPNTERWGERVADKVEGFDELQSAGSGGSAEV  
 NVVTNYTHKIPLAFISEMLGLPPEAEHRLRGITDIMLYSSDYAARREAIG  
 GLFGAVEDWVRNPADLRDGVITGLLAASDGPDAAVTEGEVIVWTLGMIIT  
 GYETTGSLLISTSLYEAIRPPHERPKTDEDITAWIEETLRVHPPFPHTW  
 RFPLEDIELGGYLIPKGAPVQVSIAAANRKPGEAGDSFDAERRGHGHLSE  
 GLGMHYCIGAPLVRLEAQIAVRGFLRRFPQARLSAETAVQWESEWMIRRM  
 SVLPAVLS

>CYP245A7 (641271809) *Salinispora arenicola* CNS-205

MPSATLPRFALTGWSRENIVNPYPVYQRYREVASVHRGEPGGDAPDTFYV  
 FSYDEVVQVLSSNCFGRGRSLDAAKASVPVPAEQKALRAIVENWLVMFDP  
 PRHTELRSLLNRSFSPRIVTELPRPRIARIAQELLSRLGQQVDVDLVESFA  
 APLPILVISELLGIPEERRAWLRANALALQEASSSRAGRVDVGYAQAEVA

AQEFTEYFREQVRLRRGRAGGDLITILANAQERGAPVSLDAIVGTCVHLL  
TAGHETTTNSLAKAVLALREHPAVLDELGAEGLTDDAVEEFLRYDPPVQ  
AVTRWAHQDITLGGCDIPRGSRVVALLGSANRDPARFSPDVLVRRPAD  
RHLSFGLGIHYCLGATLARAELEIGLQALLDGVPITLGYGTQHVDYADDLV  
FHGPSRLVLVNLGERCK

>CYP105AB8 (641272001) *Salinispora arenicola* CNS-205

MTETASSRLTDTEFPVQRECPFAEPVEYEQIREQSSIAMVRLTGGGEAWW  
ISGHEQGRAVLADRRFSSDRKANFPFVSTDPAIRKRLHAQPLSLISMDG  
AEHTQARRALIGEFTVRRLAALRPRIQQIVDQCIDEMLTTDQHRADLVKT  
LSLPVPSLVICELLGVPIADHDFEQEHTATLVRRNTASEVRQHSIDELNA  
YLGALIDRKLASPDDDLGRQIARQHRDGTFRSSMVSLAFLLLVAGHET  
TANMISLGVVGLLQHPEQLAMIKDDPKTPLAIEELLRFFTIVDSVTSRV  
ATEDVRFGDDTINAGDGVVVSGLSADWDPTVFADPDRLDLERGARRHHLAF  
GFGPHQCLGQNLARLELQIVFDTLFHRIPTLRLAAPLDKIPFKTDAAIYG  
ARELPVAW

>CYP211C1 (641272121) *Salinispora arenicola* CNS-205

MDVEELLTRLISAQGRQDPFPVYADLHAQGPIAALPPEPERRRVAAVAVG  
YDLVGAVLRDPEWSKAPPPGWTEQEILRTLQTSMMFINPPDHGRMRHVFA  
GTFTPRRLGALEPVVNRVADELDRMADAGAGGLDFVAEFAYPLPARVMA  
EFIGIPETELDWYRERVDVIDAFLDVAGKTPQRLAAANAAGAEELRAFYE  
LLARRRRTPGEDLISGLVEAVDAGGVELTEDELVSNNLIVLFNASFVTTVY  
MLSNGLPVLHAHPEVAAAALATDPVLTAGAVDEILRLQAPVHLLARAAPRD  
TVLGGVPI PQGQNVLLLVAANRDPAHFPDPRDFPWRSGPPSLAFGLGL  
HYCLGAAVSRLEGRALPRLLSRFPRLRIMEQPVYSGSLFLRGIDKLSVS  
PGEGSTRE

>CYP125A41 (641272267) *Salinispora arenicola* CNS-205

MTEPRIPAGFDFTDPEVLAHRVPREEFAELRRTAPVWWNAQPRGSAGFDD  
DGYWVVTRYADVMTVSRSDTYSTRENTAIARLRPDTTREDIEMQRVIML  
NVDPPEHTKLRAIVSRGFTPRAINALRGSLAERAHIVRDAAVRGVGFV  
TDVACELPLQAI AELIGVPQHHRKVFWDWSNQLIGYDDPAYGTDPLTASA  
ELLAYAMEMAERQSPSDDLVTKLVAQIDGHELTDEFGFFVMLLAVA  
GNETTRNAITHGMVAFLDNPEQWELFKAERPKSAREEIRWATPVNVFQR  
TALVDTVLGGQAI SAGQRFALFYGSANFDEAVFEDPERFDITRSPNPHLG  
FGGSGAHFCLGANLARLEIELIFNSIADHLPDIRKVAAPQRLRSGWINGI  
RQMPVRYR

>CYP105J3 (641272455) *Salinispora arenicola* CNS-205

MTDSVAFFPQGRVCPHQAPGYRPLAVQRPLAQVTLYDGRRVWAVTTRDLA  
RRLLVDPRISSDRNTNPAWPAIVPIVAAAVNDAQQKVLKIATALVGTGPE  
HKAQRKMLIPSFTRFRMNALRPMIQEIVDQQLDEMIQSGAPTDLIPAFAS  
AVPVTVLYRLMGIPDDDHGIFEKLSHQLLAGPNANEAYDQLMGYMSRLIA  
ERRRNPGEGLVDDLQAQHGANDDADHDELVSTLVVQVAGNHGTTGSMIAL  
GLFALLQHPEQLAELRADPSLMPTAVDELLRFLSVPDAVTRLAADDIEVE  
GTIIRQGDGVFFITSLINRDTDVHDAPNSLGWHHASAADHLTFGFGAHQC  
LGQSLARITMEIALGALIDRLPSRLAVPAEEVPFLPAASLQVIAELPIT  
W

>CYP107EU1 (641272581) *Salinispora arenicola* CNS-205

MTIGQTLPLDVYSPEFTRDPYAI FARLREQAPVCRVTTHRGMSAWMVTRH  
ADVRALLADNRLAKDGNRIGELMPRHSTLTGAATGFPPGLTTNMVNSDPP  
DHTRLRHLVGREFTGHRVEGLRPRIEEIVDDLLDGVAACGDEADLAETLA  
RRLPIAVIGELLGVPEADRAEFFRWADTLYGGTASPEALGQAYNAIVDYL  
GRLCDAKRDPADDLLTALVQVSADEDRLSREELVSMALLLLLVAGHETTS  
KQISNGVLALLLNPEQLKLLKAQPARTAGAVEELLRFEGPSLSASLRFTT  
EPVEVAGVVIPEGEFVLLSLASGNRDPEKFPDPDRDLITRSTQGNLAMGH  
GIHHCVGAALARLELEIVLSRLVARFPQMLAVEADDLEWLVNSFFRAPL  
HLPVSLRR

>CYP1198B1 (641272587) *Salinispora arenicola* CNS-205

MSGELTDQRTAPGAGGNPLRSLMDHGIRANPYPLFGELREAGPTAVEDGS  
VVLFGHEYEHCSQILRHRDMGSDTSEAPSIKGFVVDDAERAGSSIFFMDQP  
GHGRQRKLVSFSFTPRIVKSFGPQITHIVDGLFEDFRDRGELDVVTDLAY  
PVSIGIICDLFGIPDDERDMLKEWSDDLALSTELPTLGAAIGVLNVFTRD  
EINRFGSVAMAAHAYFADLIHRRRNKPGDDLVSLLATESNGERLTRFEV  
TSVLATLFVAAHESTTNLISGGILALLRNQDQMAVLRENPGITNVVDES  
LRYDPPVHLAARMARARTTIGGYDLDPGTIVVVLMAAGNRDPAYESP  
FDVNRKIRNVSLAFGAGAHFCIGSLAKLEAEIAISAFQRLKHPEVDES  
SLEYRRHIVVRGLEHMKVSFQP

>CYP105CH1 (641272594) *Salinispora arenicola* CNS-205

MSSLPLPTYPKLRDPADPLLPAPAEYLAIQSEKPIAKVLLPSGRPTWLITG  
HALARQVLTEPCVSVDRRHHPNFYPVPNPDAVVAQVARWTYILLGDDPPL  
HTERRLLISEFTVRQAQAMPRIQQLVDFHLEQLIAAGPGADFSKHFAM  
KVPSAVICEMLGVPFADHDYFQERTALQLRRDVPVAAQKQAIDELLAYFE  
QLIQEKSSHPGDDVLSRLIVSNRETEAFDHEALVALGLLLLVGGHETTAN  
TLTLATATMLERPEIAEQLRTPSLMPSAVEEFLRYFSVAVAVSRIATAD  
LQVGGQLVRAGESMLLVNLTARDGTVFPEPHRLDIRRNARNHLAFSHGI  
HQCMGQNLARVEMQIALDTVLRRLPGLHLVAPFEELPFKYRHLVWGIEEL  
RVAW

>CYP105BL2 (641272669) *Salinispora arenicola* CNS-205

MSSHSAAPDPETATPLHTLAPELTFPQFERSTPFDPQAYTELSGRCPV  
APVSMADGKPSWLITSFEGVRTTSLSDPRFSSDMSHPGFPNRTGKPVDDL  
KDTLGAMDGERHRYRRLTGELTVRRAKAMPVITQITDEALDQLAAAG  
PGADLVKHVAFVVPVSRVACHLVGIPLSYELFTGMAATLMDSTSSDDQFA  
ALQNMVSYFDTLVTDREHHRDRLGLHGMVRRYLATGELTRDMLIRLAWTT  
MAAGQETTAHMI GLGVAALLRHPDQLELLRREPHELLPGAVDELMRYLPLI  
QFGIPRVAMDDVEVDGQTVTAGEGVVALPPLANRDPVAFERPDEL DVRN  
ARQHLTFGYGPHQCPAHALARLELEVYGRLLERFPTLRLADSDADLKVQ  
DKDIMYRVSELAVTW

>CYP162A6 (641273965) *Salinispora arenicola* CNS-205

MPHGPTLTLYANELCDPELYRQGNPEDLWRRMHAAAPVHEGAFEGRRFH  
AVISHALISRMLKDPKGFSSERGMRLDQNPAAATSLAAGKMLIITDPPRHG  
KIRRIVNSVFTPRMVARLEENMRVTAAGIVDQAIEEGECDFTDVAARLPL  
SAICDMLGVPPEDWDFMLDRTMVAFGSGEDELAMAEAHADILSYEDLI  
RRRRREPREDVVTALVNGVVDGTKLTDEEIFLNC DGLISGGNETTRHATI  
GGFLALLDNPEQWETLRDDPGLLPGAVQEILRYTSPAMHVLRTAVAPTRI  
GEYALNPGDPVALWLSAGNRDPQVFADPDRFDITRSPNPHLTFSTGAHYC  
LGSALATSELTVLFDRLRLRRVDSAELTGPPRRTRSILIWGYDSVPVRLTA  
GSER

>CYP107HF1 (641273969) *Salinispora arenicola* CNS-205

MYGDTEESAGVHSANNVTPLISTDPHAAEHLREQAPACPIRSIEGSLMW  
IVARHDGVRSVLGDARFANNPASVPGGKAPQLQANAMRRLGLDEELIPYL  
ADTLSDSDGKDNRLRLVTPAFSARKVKALGPRIERLTDDLIDALPQHA  
GGGVTDLLEHFAYPLPINVIGELVGVPAADLPAWLRWTHDLSFNQQALGQ  
TLRPLVDYTYDLVRHRYDEPGEDLISELIQARDADGDRLSERELVTMVLS  
LVIAGHDTTANFIANSIWALLTHPEQLALLRADPGLMPQAVQELLRWCGP  
VLVSRMRYATEDVDLGGWTFQTGDAVTVALSGGNHDPRRFTDPGRDLITR  
QHDTRGEVHLSFGAGPHYCLGAALARHEAEIALSRMLARHPDLALAVPAE  
QLQWHAVSGMRKLATLPVRL

>CYP113S1 (641273972) *Salinispora arenicola* CNS-205

MGTAPAYSLDGGRSLHRWLDRDMREHHPVHRELLTRVWTLRYRDITQATA  
DPAVFSSELWRYLPGDRGDDALTAGNLTAMDPPRHRLVRDLVSRSTARA  
VGALRPRIAAIAELIGAVADRGEMDVVADLSDPLPVLVIGELLGLPMAD  
RELLSDWARRLLSFDKGDLTDEVVRKRVADTQQEELLDYLRVHCRRRRTNP  
QDDLISRLIRAEVDGQRLTEDEVVNFANLLLLAGHVTTLLLLANIVLTLD  
EHPAVAAEARADRGILPGLIEETLRYRPVIVSNMRVTTTRAVTVGTEQLPA  
GQLVSLSFISGNRDEQYFTDPDRFDIHRDARKHLGFGHGIHYCLGAPLAR  
LELGIALDAMFDRFSRIEVTGVPVDYDTPGVAGPRSLRIAFRHH

>CYP107AY2 (641274297) *Salinispora arenicola* CNS-205

MTAEPTPIPRSGARLGQEYDQLRKTDGVHQVLLPDASLAWLVTNPEVAAR  
ALADPRLALNRRNSRGGWSGFALPPALDANLLNLDAPDHTRLRRLVGPFAF  
SPQ RVAALRPGIRRAAEHLLDTLVATSGPTDLVTGYCNPLSVQVIADLMG  
VPEAGRTNLRATDTMLTSYPPDRDAIRRAVTELHGYYVDLIDIKQQQPG  
DDLSTLVTIEQDGDRLSRDELTSLAFLILFAGYENTANLIASAVLWLLD  
HGGLNVVPISEAIEATLRHEPPAPVAIRRFPTEDIIIGGV TIPAGDTVLL  
SVAAATRGADGNAARLAFGNPHYCLGAALARVEAEALTVLARRLPGLT  
LAVPPSQVRWRPTFRTHGPAELLVGW

>CYP105CT1 (641274328) *Salinispora arenicola* CNS-205

MNSPNHMPADRSLTAPTSGCPMALSRGRVGLDVADEISELRDGGRLGRIT  
TAFGQEATLITRYDEVRAQMADSVVFNVAGVPSPPALVDGGFDTESVRRR  
RTVGNLIMLDPPEHTRLRRMVAAWFTTRRVERLRPRVVEIIDAALDEMER  
SGPPVDLVAMFAKTVPITVICELIGVPEELRERYRRRAERAVSASAVSTP  
LDELRLREAGWVSRELIEYHRENPSDDIIGMLLREHGTDSDYDDGITDDE  
LVGLANALLIAGHETTTQMLSMGTLALLRHPDQLALLRDDPSIVAGAVEE  
LLRYVGVLLHGGFVRVATRDTRLGGHRIHAGELVVPALTAANRDPRLITDG  
DRLDITRPPTSHVAFGHGVHFCIGAPLARMELREAFPALRRFPGLRLAV  
PDSELEFTQGT TVYSLRGLPVTW

>CYP154M5 (641274344) *Salinispora arenicola* CNS-205

MEQSCPYKLDVTGRDVHAEGEAI RARGPVAQVELPGGVQGSVTGYQAAR  
QVLADPRFAKDPKKWPAYTSGAIPPNWPLIGWLLMDNMTNDGADHQRLR  
KLVS HGFTPRQVERTRPLIVKIVNDLLDGLSSAGPDEVVDLKGREFATPLP  
ARVICDMFGVPEALRASVLRGAQVNVTS SISEEAEANVEQWHRELLELV  
EAKREKPEDMASLLIAAKEEDGSTLTQEEVVGTLHMLGAGSETLMNAL  
SYAVLGMLSNPGQYEMVRNGTSSWDDVIEETLRAQAPVAQLPLRYATEDV  
AVGGAVIKAGDPVLMGFTAIGRDPVHGETAGDYDITREDKTHLSFGHGV  
HFCLGAPLARLELKIALPALFERFPHMTLAVRPDQLEPQGT FIMNGHREL

PVRLGQPATVLA

>CYP107AW7 (2516072425) *Salinispora pacifica* CNT131

VETVTGTSTPPVPYIADPYPTLARIRANGPVSILHSDEGIPMWVIARYR  
DVRAALADPRFGQDARRAQALADNRVAGVTLGGDIVHMLNSDPPDHTRLR  
RHVQGAFTARRVAAMRPLVERITTSLLDGLTGRTTVDLVQDFAFPLPLV  
ICELLGFPAEERNAYRSWSTAILTHDDDPAAAFATALREMTDYIAVQLRIR  
QTRPGDDILTELLAARDAGQLTDDDEIIGMVFLLLIIGHETTVNLLGTATL  
ALMRNPDQHRWLLANQHALLPEAIDEFLRYESPVAMATLRFRTTTPVAVDDV  
VIPAGELVLVSLGGANRDPDRFPDADRLILDRRDTGHLAFGHGLHRCGLGA  
FLGKLEGEVALGALLRRHPRLALAAEVRQLRWRDTIMLRGLESPLVSLHG

>CYP107AX4 (2516072440) *Salinispora pacifica* CNT131

MTSQPAPVFDQLLLRDPHRRYNALRDEAPVHHIRTLDGAPAWLVTRYDDV  
RAAFTDPRLSVDKRLSSTDGEHGSSLPPELDAHLNLRDPPDHTRLRLRLAA  
AAFTPRRVADLRPAVERIVSTLLDGLVGHDQAEIIGSLASPLPLQVMQEL  
LGLPTQTSVDFERRWTNTLLSADANQPAQSRSAMANMRRFLVEQLAHKRAR  
PGDDLLTGLLAAREDDRLTDDDELVAMLFLLMFAGYDNTAALIGNVVHAL  
LTNTELPAAVRTGSLALDELVDGVLRWNPSFPLAVRRFAREPITIAGQTI  
PAGDRIWLCLASANRDPAQFTAPDTLGTGMRRPHLSFGHGIHYCLGASL  
ARLQTTVAVTILLDRFPGIRLAVPAHDIRWRESFRLRGLVALPVFL

>CYP164C2 (2516072927) *Salinispora pacifica* CNT131

MTARAGSVAEDI IQLADRMGREDPYVPLHRMRQASPYVALPGLVVAGTHA  
TCSAVLRDPGMSSERQRATLAPAARGPRTNRLHLDPPDHTRLRLRLVSKV  
FTPRVVATMEPHIRRTTDDLLTAAAARGSMEEVADLAYPLPLRIICEVLG  
VPAEDHHLVQHWSARLSEALEPPIPGLVSTTTSTEAARARAGFIAYFQAL  
IADRRRSRPRADLVSQLVAVEDASERLDSSDILATCILLINAGHETTVNLI  
ANGVLALLRHPEQLADLRAEPGLAAATVDEVRLRYDAPVQITSRVAKHDTR  
LGAADVVRAGDMVVLLLGAANRDPVYPDPDRFDIRRRSPVPHLAFSAGAH  
FCLGAGLARLEAQIALSAVAARLREPRLRAGGVSYKPNLSLRGPDVLTVD  
FDDVLAPGRRDQGEANG

>CYP211B11 (2516073147) *Salinispora pacifica* CNT131

MDASEAVALLTSPPGRLDPYPTYERLRAHGPPVSTAAGFFVVTGYTEADT  
VLRNPRFEVMDDEERDGVFPHWQDSPAMISISRSMIRANPPDHSMRRLA  
AGVFTPRRVAALREVVAQAADGLVDEMIRAGRGAADVDFMGSFAYPLPVT  
VICALLGVPTADWARFRHWASDLTGVLPEITPQELAIADAGASELRDYF  
TELIAQRRRAPADDLTALVQAHDADGDRLSGEELLANLVLLLVAGFETT  
TNLLGNGLVVLLTHPDSATALRGQPELAPGYVEEFLRYDSPVQLTSRTVR  
ESVSLAGVELPAGSWLLVLLGAANRDPARFTDPARFDPRAQSPPLSFGA  
GAHYCLGAGLARLEAQVAFPLLLRRLPELALAGEPTRRHRLTLRGYETLP  
VTVGAVPADPGTPAGVALGTP

>CYP125A65 (2516073791) *Salinispora pacifica* CNT131

MTEPRIPVGFDFTDPAVLERRVPREEFAELRRTAPVWWNVQPRGSAGFDD  
DGYWVVTRYADVMAVSRDSETYSTRENTAIARFQPGTTQADREMQRVIMI  
NVDPPHEHTKLRAIVSRGFTPRAINALRGSLAERAERIVRDAAVRGTGDFV  
TDVACELPLQAI AELIGVPQHRRKVFWDWSNQLIGYDDPAYGVDPMAAAA  
ELLAYAMEMANERQRNPSDDLVTQLVNAQIDGHELTDEFGFFVMLLAVA  
GNETTRNAITHGMLAFLEHPDQWELFKAERPRSAVEEIIIRWATPVNVFQR

TALVDTTTGGQAITAGQRVALFYGSANFDES VFEEPERFDITRSPNPHLG  
FGGSGVHFCLGANLARLEIELIFNSIADHMPDIRKVADPQRLRSGWINGI  
REMPVRYR

>CYP208A22 (2516075212) *Salinispora pacifica* CNT131

MTVIADRGGRIPPGPPVTAGLRLLLLALGRDRLGMMTSAAA EYGDVARLPV  
GPKKLYFFNHPDHAKHVLADNHANYQKGIGLVHARRALGDGLLTSEGELW  
RKQRRVIQPAFQNRRLAQYAGAVGQEATRLVARLATRVDPVPDVLDEMT  
RLTLGVLGRITLLDAELTGFGVGVGESFAAVQDQAMFELETNTVPTWIPLR  
RQRRFRRARQHLQEVVDVLA AERGQAVEGRDDVLSRLILSTRAEADPQLG  
RERLRDELVTLLLAGHETTASTLGWSLHLLDQHPELRERVRHEARTVLGD  
RVPAYEDLHQLRYTAMVVEEAIRLYPPVWILTRKARA EDEIGGYRVPAGA  
DILICPYTLHRHPRFWAE PERFDPERFDPSRTTDRPRYAYIPFGAGPRFC  
VGNNLGMLEATLVLA VLLRDLRLEGLPGRAVVPEPMLSRLVRGGLPMTVR  
RVD

>CYP124M3 (2516075233) *Salinispora pacifica* CNT131

MTVPIELDVAVDLSNDNDFWTKPLEYRHAVFNALRAQPGLPHFASPEFGSAP  
RGRGYALTRMDDVLAVSRNPSVFI SGKGNVAMEVPAEFLDQSLITMDNP  
RHARLRRIVS RGFTMKAVTALMDNASQMAKQIVDEVVERGECDAVVDISA  
KLPLGIIICNMGI PDSQQQVFVEQTNVMLGVQDPEYVGEQNDAMLAMSV  
SQELADLMHELATLR AKNP TDDLISKLLSAEVNGEALTPSEL AHFFILLT  
GAGTETTRNAISWGIQLLTQSPEQREAWLSDIDGVTP TAVEEIVRWSSPV  
ISQRR TVAEDAEPVKLAGQLLGPGDKVLMFYGAANRDPNYFVHPEGFDVR  
RSPNPHVGYGGPGPHFCLGAHLARLEISVMFRELLTRIPDIHATGEPARL  
KSPLINGIKRLPVAFTPGAR

>CYP107FH3 (2516075353) *Salinispora pacifica* CNT131

VPIELDEAFVQDPYAVYEKLRAEGPAHRVRMPPGVPLIGGLPVWLITGYD  
AVRAALADSRLSTD LHRIDGLFAQKDPDRSHRGGFSSALASHMMHTDPPD  
HTRLRKLVS KAFTTRAIEALRPRIQQTDEL TADLAGHDTV DLLDAFAFP  
LPIRVICLLLGVPVAEQENFRSWSRALVSGHSPEAAATAATEVAAYLGDL  
VERKRHATTDDVLTALVA AHDDRLTHTELVSTAYLLFIAGFETTLNAL  
GNGTLHMLHRDQWTALRADRALLDNAVEEFLRLESPLKHATFRCATESL  
RIGDAEIAAGDFVLLAIASANRDPLRFDPHTLDVRRPAAGHLAFGHGIH  
HCLGAPLARVEVRMAFDALLDAFPDMRLATDPAGLRWRNSTIIRGLDSL P  
VHLNN

>CYP2054A3 (2516075358) *Salinispora pacifica* CNT131

MSISADSEQVQGRFPDPYGAHRDDPYTFLAGLG VFYAPLLDAWCVTRED  
MVAVLRDDRSFSARDHNPRPAVALPDDVNQMFRTWRGAGAVAVGSLDPPA  
HAKIRDVLNIGFTPARVRAFEPTMRAVAADLADRIGDAPEFDFIADFAVP  
FALEVIGRRLGV PDDYLDRCRTWSEQRIELMMAQGDADHDRLREFARGLM  
EFGEFARSLVRDRVADPRDDLISELLHDGKAGRTLTADEVAVQIPTLIFA  
GHMTCAEALGTIFYQQLRSPGGWARVVDRTIPVGD LVEEGLRFDSPLAGM  
YRTATRDVTVGGIRLTAGSRLLLLYGAAGRDSRAHACPAAFRPGDGSSGH  
LAFGHGHIHFCLGAGFARAELRVAVEVLAARMPDLGLAPGRPPRF RVPFPL  
RALTEL RVTRSGGSGP

>CYP161N4 (2516075363) *Salinispora pacifica* CNT131

VNTVAQLPFTQTHVLVDVAPALRLLQSRGKVHRVRTPEGVPAWLVTGHAEV  
QQLLDDDLRSRSDPGGRDGGTALLNKLLGPLADDPRLRSLLFPQFTPER  
LEPLRAVVEKLTEQHLDELATRTPVDLRPTLAMSILVLCEWLGVPAE  
DKGRFSIWTQDAAGVQDPERSQRGLAELFGYCRQLVAAKRQDPGDDVISR  
LIATAGIGDTEVVALTALLLFGGYETTVARIGTGVLILLANPDQWAAVRA  
DPALVPATVDELLRRSMPNPNHNGMPRFAVTGFEIDGAAIRAGDLVLLNI  
IAANHDETAFFPDPDRDLITRPTAGSLAFGYGRHSCVGAPLARMVLRVALS  
RLITRFPDLRLAVGVDELKLRHETLVGGGLVELPVTWGPR

>CYP105AB28 (2516075865) *Salinispora pacifica* CNT131

MTETASTTTPGISSTTTSGPASGEVTDAEFPLERGCFFSTPTEYEQIREH  
SPLAKVRLTTGREAWWIAGHELGRAVLADRRFSSDRRRDNFPFVSTDPE  
RKQLQDQPTSMIGMDGAHAQARRALMGFTVRRMAGLRPRIQQIVDQHI  
DEMLSSDQRTADLVEALSIPVPSLVICELLGVVPYADHDFQARSGPLIRH  
TTPTEVRLRIQKELNTYLALIDRKVADPTDDLRSRQIAKHHAAGTFDRT  
SLVSMAFLLLIAGHETTANMISLGVVGLLQHPDQLAMIKEDPEKTAPAVE  
ELLRYFTIADTVTARVATEDVQLGGTTINAGDGVVISGLAADHDPTVFTD  
PDRDLERGARHHVAFGFGPHQCIGQTLARMELQIVFDTLFRRIPTLRRLA  
APLDDIPFKSDAFVYGAERLPVAV

>CYP107AY9 (2516076090) *Salinispora pacifica* CNT131

MSQDQPTRAELAPIPRSGTRIGPEYDQLRKTDGVHQVLLPDTSMAWLVTS  
PDLVSRALADPRLALNRKHSRGGWSGFALPPALDANLLNLDAPDHTRLRR  
LVGPAPSPQRVAALRPRIQRTAEELAETMVATGSPVDLVTGYCTPLSVQV  
IADLLGVDPDAGRDTLRAWTDMLTSYPPDRDAIRQAVVELHGYVNNLIEA  
KQQRPGDDLSSALVATEQEGDRLTRDELTSALFLILFAGYENTANLIAS  
VLRLLDHGSLRGVRVSEAIEETLRLEPPAPAAIRRFPTTEMTIGGATIPA  
GDTVLLSIAAATRGADGNPARLAFNGPHYCLGAALARVEAEEAITVLAR  
RLPGLALAVPGAPVRWRPTFRTHGPAELLVAV

>CYP244A10 (2516076110) *Salinispora pacifica* CNT131

MQDTAQANLAEAPEVRMPIELRPTDCLPELLAAARVAPVVRTPYLDQHAW  
VVCDELVKQALHTPKLGKDVAPDWMRQPGQMTAMPPEYARMVMMS  
DGEHHARIRRIHAPVLSRPNTERWSERVAALVDGFLDNLDSADGTEVNLI  
TDYTHKIPLAFTAEMGLPPGAERRLHDITEVMLYSADYALRQQAVGELF  
EAVQEWVRDPAGLRDGVITGLLASADGPDATVTKGEAIVWTLSLIINGYE  
TTGSLISAALYEALRRPARERPHTDEAVAAWIEETLRVQPPVPHTTWRF  
LADLDLGGYLIIPGAPVQISLAAANLDPDEDADSFDAQRRGRGHLSFGLG  
AHYCIGAPLARVQTKIALRGFLRRFPQARLSLDTAPRWESEWMIRMSVL  
PVLLA

>CYP107AY16 (2516076408) *Salinispora pacifica* CNT131

MRVEPTSIPRSGAQLGQEYDQLRKTDGVHQVLLPDASLAWLVTNPEVVAW  
ALADPRLALNRRNSRAGWSGFALPPALDANLLNLDAPDHTRLRLRLVGP  
SPQRVSALRPGIRRAAEHLDTLVATTVTDLVTGYNPLSVQVIADLMG  
VPEGGRTNLRAWTDMLTSYPPDRDAIRQAVTELHGYVVDLIDIKQQQPG  
DDLSSALVTIEQDGDRLTRDELTSALFLILFAGYENTANLIASAVLWLLD  
HGGLTVVPHSEAIEATLRHEPPAPVAIRRFPTEDILIGGVTI PAGDTVLL  
GIAAATRGADGNAARLAFGKGPHYCLGAALARVEAEEALTVLARRLPSLT  
LAVPP

>CYP1005A6 (2516076637) *Salinispora pacifica* CNT131



VSAVLFRSWTKTAGTHWPAVTRVADQQGTEHLVVTEHALVRQVLTQVITY  
RPDNALDAVTPIPVAAALRVLAGHRFRLPPTLANNGGVSHPAIRALVADAL  
HPAKVAAQRPWLTTELVAERVAAIRATLDSGGSADLHAELSADLPLLVLAR  
LVELPDAPVSAVKQFARAALFVWAPLDADRQLALADEVGRFHQVLRIFA  
DTGGGLAAALRATGHPPDVLVGALFFLLVAGQETTSQFLTLLHRLAGEP  
TVRAALRDGSVSVPNVVEEGLRLEPPIVWRRVAAVDSTLGGTAVPAGTS  
VLLWLARAGRDPAIVSAPDEFPRPGQRGSRRLAFGAGAHRCCLGDQLARME  
AAVVVERVSPLLDGVTVVRAPWYPDNLTFRMPDAFVIRRGPAAGAAER  
AQVRWRPTFRTHGPAELLVSW

>CYP107E37 (2516076675) *Salinispora pacifica* CNT131

VTIDQEIREYPPFRESRGIGIDPTYELLRRTEPLARVQLPYGEVSWLVTRY  
EDVKTVLTDPRFSRAAAQKQDQPRTRAEMTYEGIIGLDPPDHTRLRLRLAG  
KALTARRVNAIRADAQRIANEYVDEMIAGKSPGDLVELFALPYPVTVICE  
LLGVFFEDRAQFRIWTEGLTSTSEQLMVYAEQLFDYMGKLVARRAEPTD  
DLLGALVKARDEGDRLTEQELLSIAGVGLLLTGVEVTVSTHINPFIYALLT  
HPELMAQLRADRSVPAAVEELLRMIPLNPAAMFPRYAVEDVTLSGITVR  
AGQPVLVSLPGANRDPEVFENPETFDFTREQNPVAFGHGPHHCLGAQLA  
RMELQVALHTVLDRFPDLRLADGDEGVSWKSGLLVRGPSRLLVGW

>CYP107FH4 (2516076790) *Salinispora pacifica* CNT131

MPPGIGTPIRKNVMTQIPLSPDIIELDDQFMQDPHAVYARLNEKGPLHQV  
RIPPGVPVCGGLTVWLVTGYDQVRAALADPRLSTDRLKTEALFAQNQPDS  
TKRGGFSSTIANHMLHNDPPDHTRLRLKLVNKAFTSRAVERLVPQIERIAD  
ELLDSLSERETVDLLDLYAFPLTFRVICALIGVPEEDQENFKESKQLIS  
GGSAEVAASAIMHDYLRVASKRDAPGEDVLSALVQARDADDRLAEN  
ELISMAFLIIIGAHETTANTVSNGLLHMLTNLSQWEALARDSLLAGAT  
EFLRLESPLKHATFRCVTESLWIGDVELPAGDFVLISLAAANRHSGHFGP  
DPQVLDIERQTRGHVAFGHGHIHYCLGAPLARVEAHIAFSALLNRYPGMRL  
AADPQDLRWRTSTLIRGLHELPVRLVSAPQGHVGS

>CYP211B11 (2517979575) *Salinispora pacifica* CNT609

MDASEAVALLISPPGRLDPTYTYERLRAHGPPVSTAPGFFVVTGYTEADT  
LLRNPRFEVMEDEERDGVFPQWQDSPAMISISRSMIRANPPDHSRMRRLA  
AGVFTPRRVAALREVVAQAADGLVDEMIRAGRGAADVDFMGSFAYPLPVT  
VICALLGVPTADWARFRHWASDLTGVLPEEITPQELAIADAGASELRDYF  
TELIAQRRRAPADDLTALVQAHDADGDRLSGEELLANLVLLLAVAGFETT  
TNLLGNGLVLLTHPDSATALRGQPELAPGYVEEFLRYDSPVQLTSRMVR  
ESVSLAGVELPAGSWLLVLLGAANRDPARFTDPARFDPRRSQSPPLSFGA  
GAHYCLGAGLARLEAQVAFPLLLRRLPELALAGEPTRRHRLTLRGYETLP  
VTVGAVPADPGTPAGVALGTP

>CYP244A12 (2517980718) *Salinispora pacifica* CNT609

MQDTAHVNLAEPVVTMPIELRPTDCLPELLAAARVAPIVVRTPYLDQHAW  
VVCDELVKQALTHPKLGKDVVALAPDWMRQPGQMVMTAMPPPEYARMVMMS  
DGEHHVRIRRIHAPVLSRNTGRWSERVAALVAGFLDNLDSADGTEVNLI  
TDYTQKIPLAFTAEMGLPGPVERRLHDITEVMLYSADYALRQHAVGELF  
EAVQEWVRDPAELRDGVITGLLASTDGPDAVTEGEAIVWTLISLIINGYE  
TTGSLISAALYEALRRPAPERPHTEAFAAWEETLRVQPPVPHTTWRF  
LADLDLGGYLIPKGAQVQISLAAANLDPDEAADSFDAQRRGRGHLSFGLG

AHYCIGAPLARVQTKIALRGFLRRFPQARLSADTAPRWESEWMIRMSVL  
PVLLA

>CYP107AY8 (2517980738) *Salinispora pacifica* CNT609

MRAELAPIPRSGARLGPEYDQLRKTGDVHQVLLPDTSMAWLVTSPELVSR  
ALADPRLALNRKHSRGGWSGFALPPALDANLLNLDAPDHTRLRRLVGPAF  
SPQ RVAALRPRIQSAEELAETVVATGSPVDLVTSYCTPLSVQVIADLLG  
VPEAGRDTLRAWDTMLTSYPPDRDAIRQAVVELHGYVNNLIEAKRQRP  
DDL SALVATEQEGDRLTRDELTSALFLILFAGYENTANLIASVLRLLG  
HGSRLRGVRVPEAIEETLRLEPPAPAAIRRFPTTEMTIGGATIPAGDTVLL  
SIAAATRGADGNPARLAFGNPHFCLGAALARVEAEEAITVLARRLPGLA  
LAVPGASVRWRPTFRTHGPAELLVAV

>CYP163B20 (2517981077) *Salinispora pacifica* CNT609

VTATDAKDVGVGSRNVASTIDLADPATFAGHDLTNFWQRLRDEEPIYWN  
PPTSGRRGFVWLSRHADILEVYRDDMTFTSERGNVLVTLLAGGDAGAGRM  
LAVTDGPRHTELKLLLRALGPRVLGPVCRAVRANTRQMIGAAAANGECD  
FATDIASSIPMITISNLLGVPEADRASLLKMTKTALSADDESISDTDSEM  
ARNEILLYFQDFVEFRKNPGEDEVVSMVLNSSIDGVPLSDDDIVLNCYSL  
IIGGDETSRLTMIDSINTLAANPGQWRRLKEGRCDIDKAVDEVLRWASPS  
MHFGRTAVRETVIHGERIQVDDIVTLWGASGNRDERAFKQPEVFDLGRVP  
NRHLSFGHGPHYCIGSYLAKVEISELLIALRDLILGFEVIGEPQIRIRSNL  
LSGFSTMPVRFDADRTGLASEAREG

>CYP125A65 (2517981222) *Salinispora pacifica* CNT609

MTEPRIPVGFDFTDPAVLERRVPREEFAELRRTAPVWWNVQPRGSAGFDD  
DGYWVVTRYADVMASRDSETYSTRENTAIARFQPGTTQADREMQRVIMI  
NVDPPPEHTKLRAIVSRGFTPRAINALRGSLAERAHIVRDAAVRGTGDFV  
TDVACELPLQAI AELIGVPQHRRKVFWDWSNQLIGYDDPAYGVDPMAAAA  
ELLAYAMEMANERQRNPSDDLVTKLVAQIDGEHLTTDEF GFFVMLLAVA  
GNETTRNAITHGMLAFLEHPDQWELFKAERPRSAVEEII RWATPVNVFQR  
TALVDTTLGGQAITAGQRVALFYGSANFDES VFEEPERFDITRSPNPHLG  
FGSGSVHFCLGANLARLEIELIFNSIADHMPDIRKVADPQRLRSGWINGI  
REMPVRYR

>CYP208A30 (2517982635) *Salinispora pacifica* CNT609

MTVTAAGRTFSGPTGSALLRSLWQLGRDRLGLMTSAARYGDAVRLGVGSR  
SLYFFNHPDHAKHVLADNSGNYTKGIGLVHARRALGDGLLTSEGELWREQ  
RRVMQPVFQAKRIAGQAHAVAEEADRLLARLRARRGGGPVNLTDEFTALT  
LGVLGRTLLDAKLDAFASVGAAFEEMQNQAMFEMASMSLVPMWVPLPQQL  
RFRRARRELERIVGRLVADRTARGEVTGADDALSRLIAATQDEPDPGFAR  
RRMRDELVTLLLAGHETTASTLSWTFHLVNQHPWVRGRLRKEAIEVLGDR  
LPEYADLARLT YTKMVVSEAMRLYPPVWMLSRLARDADVVDGYVPV  
PARADVLICPYTLHRHPAFWPEPERFDPERFDGAVTDRPRYAYVPFGAGPRFCI  
GNHLGLMEAVFVAMVSREFELVAPVGQPVVAEPMLSLRIRGGLSMTVEP  
VS

>CYP107AW10 (2517982780) *Salinispora pacifica* CNT609

VETVTGTSTPPMPYIADPYPTLARIRANGPVSI LHSDEGIPMWVIARYR  
DVRTALADPRFGQDARRAQALADNRVAGVTLGGDIVHMLNSDPPDHTRLR  
RHHVQGAFTARRVAAMRPLVERITTSLLDGLTGRTTVDLVQDFAFPLPMLV  
ICELLGFP AEERNAYRSWSTTILTHDDDPAAAFATALREMTDYIAVQLRIR

QTRPGDDILTELLAARDAGQLTDEEIIIGMVFLLLIGGHETTNNLLGTAIL  
ALMRNPDQHRWLLANQHALPKAIDEFLRYESPVAMATLRFTTTPVTIDDV  
VIPAGELVLVSLGGANRDPDRFPEADRLILDRRDTGHLAFGHGLHRCLGA  
FLGKLEGEVALGALLRRHPRLALAAEVRQLRWRDTIMLRGLESPLVSLHG

>CYP1005A6 (2517983149) *Salinispora pacifica* CNT609

VSAVLFRSWTKTAGTHWPAVTRVADQQGTEHLVVTEHALVRQVLTQVQTY  
RPDNALDAVTPPIVAAALRVLAGHRFRLPPTLANNGGTSHPAIRALVADAL  
HPAKVAAQRPWLTELVAERVAAIRATLDSGGSADLHAELSADLPLLVLAR  
LVELPDAPVSAVKQFARAALFLFWAPLDADRQLALADEVGRFHVQLREFE  
DTGGGLAAALRATGHPPDVLVGALFFLLVAGQETTSQFLTLLHLRLAGEP  
TVRAALRDGSVSVPNVVEEGLRLEPPIVTVRRVAAVDSTLGGTAVPAGTS  
VLLWLRAGRDPPIVPADEFRPGQGRSRRHLAFGAGAHRCCLGDQLARME  
AAVVVERVTPLLDGVTVVRAPWYPDNLTFRMPDAFVIRR

>CYP107AX6 (2517983482) *Salinispora pacifica* CNT609

MTSPPAPVFDQLLLCDPHRRYNALRDEAPVHHIRTPDGAPAWLVTRYHDV  
RAAFTDPRLSVDKRLSSTDGEHGSSLPPELDAHLLNRDPPDHTRLRLRLAA  
AAFTPRRIADLRPAVERIVSTLLDGLAGHDQAEELIGSLASPLPLQVMQEL  
LGLPTQTSVDFRTWTNTLLSADANQPAQSRSAMANMRRFLVEQLAHKRAQ  
PGDDLTLGLLAAREGDWLTDDDELVAMLFLLMFAGYDNTAALIGNVAHAL  
LTNAELPAAVHTGSLAVDELVDGVLRWNPSPFLAVRRFAREPITIAGQAI  
PAGDRIWLCLASANDPAQFTEPDTLGTTGMRRPHLSFGHGIHYCLGAPL  
ARLQTTVAVTSLLDRFPGIRLAVPAQDIRWRESFRLRGLVALPVFL

>CYP1207A12 (2517983870) *Salinispora pacifica* CNT609

MITVPPTDRYLLDEDLVADPYPYLAELRVAEPVRWSPVHRAWLVGTGEAA  
ASCYAEPAISADRIGPMLAQTPLELLSPEAARAFTIMAGWMVFVDPPEHR  
RLRSVFRGAFGARQVRRNRPMVQEAVTRLTARTGTGTVGDTVDLVAEFARPL  
PATVAASWMGVPVEDTAVFQRWAIQVGDALGTVQSPEEHERSQALLDL  
FDYLRMLVRRTRATPGEDLISAALANGLVGDSVSEDEFVAMLTHVAFAGG  
ETTSNLIAGVTWNLLRHPDQLALLRAEPELAPVAIEELLRFDGPSKMSIR  
HVKNDELAVAGQRLRAGQRLYVVVTAGANRDPDYFDHPNELDVRHPNPHLG  
FGQGGHFCCLGAPLARLVAGAALTDLLAAAPGLALSTA-EVRWQPSLLNRSL  
QALPVR

>CYP107LA2 (2517983889) *Salinispora pacifica* CNT609

MECPVTARSSRFYPFSDRADLILDPITYGELRSKEPVARVRMPYGGGDAWL  
VTRHADAKKALSDPRLSIAAGAGRDVPRASPRIQEAEGLMGMPPEAHARL  
RRLVATAFTPRRVRDIAPRVAEIIADRLVNDVIETGPPADLVRQIALPVPI  
TIIICELMGVPAEDQHVFVRVFSDALMSSTRYTDDEVDQAVQEFTAYLGGLL  
TQRRAHRTDDLIGALIEARDDGERLSEELIMLTGGLLVGGHETTASQIA  
SHLLVLLRDRARYETLSARPELIPTAVEELLRVAPMWVTVGPTRIATEDL  
ELNGVTIRAGDAVIFSLSSANLDEDAFPDATDVVLDREPNPHIAFGHGPH  
FCIGANLARLEIQATIGALVRRRLPGLRLAVEENDLEWRRGMIVRSLAALP  
VTW

>CYP113B7 (2517983890) *Salinispora pacifica* CNT609

MTQTDNAPMPPLDLPGKADAQGLLDWFAYMREHSPVSWDETRQAWHVFN  
QDYLTVTNPLIFSSDFSPVFPVPELALLMGPGTIGGIDPPRHGPMRKL  
VSQAFTPRRIAQMEARIETITADIFEQVRGQERIDIAADLAYPLPVTVIA  
DMLGIPNEDHEKFREWVDIILSNEGLEYPNLPDDFTETVGPAAEWSEFL  
YAQIAEKRARPDQDLMSGLLAVEVEGRRLTDEEVVNIVALLLTAGHISSA  
TLLSNLFLVLEEHPALAAVRADRSVPGVVEETLRWRSPFNCIFRLLAQ  
DTEIFGQPMRKGMVIAWIASANRDTEVFAEPDTFDIRRKS NKHLAFGYG  
IHHCLGAFLARQEAKVFLNQVLDEFSEFTIDHDGVEFYDPDQLTARRLPV  
QVVR

>CYP107E37 (2517984117) *Salinispora pacifica* CNT609

VTIDQEIRKYPFRESPGIGIDPTYELLRRTEPLARVQLPYGEVSWLVTRY  
EDVKTVLTDPRFSRAAAQKQDQPRTRAEMTYEGIIGLDPPDHTRLRRLAG  
KALTARRVNAIRADAQRIANEYVDEMIAGKSPGDLVELFALPYPVTVICE  
LLGVPFEDRAQFRIWTEGLTSTSEQLMVYAEQLFGYMGKLVARRAEPTD  
DLLGALVKARDEGDRLTEQELLSIAGVGLLLTGVEVTVSTHINPFIYALLT  
HPELMAQLRADRSVPAAVEELLRMIPLNPAAMFPRYAVEDVTLSGITVR  
AGQPVLVSLPGANRDPEVFENPETFDFTDQNPVAFGHGPHHCLGAQLA  
RMELQVALHTVLDRFPDLRLADGDEGVSWKSGLLVRGPSRLLVGW

>CYP105AB37 (2517984125) *Salinispora pacifica* CNT609

MTETASTTTPGISSATTTPRISSTTTSGPASGEVTDAEFFPVERGCPFSTPA  
EYEQIREHSPLAKVRLTTGREAWWIAGHELGRAVLADRRFSSDRRRDNFP  
FVSTDPETKKQLQDQPTSMIGMDGAHAQARRALMGFTVRRMAGLRPRI  
QQIVDQHIDEMSSDQRTADLVEALSLPVPSLVICELLGVYPYADHDFQ  
RSGPLIRHTTSTEVRLRIQKELNTYLGALIDRKVTDPTDILLSRQIAKHH  
AAGTFDRTSLVSMAFLLLIAGHETTANMISLGIVGLLQHPDQLAMIKEDP  
EKTPPAVEELLRYFTIADTVTARVATEDVQLGDTTINAGDGVVISGLAAD  
HDPTVFTDPRDLRLERGARRHVAFGFGPHQCIGQTLARMELQIVFDTLFR  
RIPTLRLAAPLDDIPFKSDAFVYGAERLPVAW

>CYP113E1 (640472873) *Salinispora tropica* CNB-440

MATVPRLTFADGGVSVLPWFRQMRDDQPVWYDQGTGSWNVFRYADIAQIL  
TDPATFSSDPGRTPPELVEEAEGSLVAVDPPRHGRLRALISTAFTPRLV  
EQLAPRVRSIAERLLDRFTVDRGPEGEFDAIGDVAYLLPVYVIGELLGLP  
ETDREYLVRTADEFYAISADDPFDGTYMASMQSTLDGLGTYMLDQAERRR  
ARPGDDLMSALAHAEIDGEQLNDREIRNFAVLLLTAGHITTTALLGNTLL  
ALGERRDVMLRWRHGQVDTADVLEEVLRRHTPFTEVYRFTTTEVTIGNQV  
VPGDQLRLWLIASGNRDERQFADPDFTFVLGRDSRHLGFGLGIHYCLGASL  
ARMESVVLVLEVLAEERTTLAPAVQGLSYYDAPGIFCLRSPLVSYRRS

>CYP163B1 (640473290) *Salinispora tropica* CNB-440

MTAADTGRVSGESQTPAHTVDLADPATFANHDLTGFWQQLRDEEPIHWN  
PPTAGRGRFVVSRYADILDVYRDDVTFTSERGNVLVTLLAGGDAGAGRM  
LAVTDGPRHAELRKLLLRALGPRVLAPVCAAVRTNTRQMIREAVTKGEC  
FASDIASRIPMMTISNLLGVDPADRAFLSLTKTALSADDESISETESAM  
ARNEILLYFQDLMEFRRDHPGEDVVSMLVNSSIDGAPLSDDDVLNCSYL  
IIGGDETSRLTMIDSVNTLAAHPQQWRRLLKDGQCEIDKAVDEVLRWASPS  
MHFGRVAARDTILHGVRIRADDIVTLWHASGNRDERVFHRPEVFDLGRTP  
NRHLSFGHGPHYICISYLAKVEISELLIALRDLTSGFETTGEPRIRSNL  
LTGFATMPVRFPVDRAGLARDALDG

>CYP105AB2 (640473609) *Salinispora tropica* CNB-440

MTETASIAATTRTASGQLTDAEFPVQRCPTTPTTEYEQIREESSIAKVRL  
KNGGEAWWIAGHELGRSVLADRRFSSDRRRDNFFVSTDPETRAQLQSQP  
TSM LGMDGA EHAQTRRALMGFTVRRMAGLRPRIQQIVDQHIDEMLATPQ  
RSVDLVEALS LFPVPSLVICELLGVYPYADHDFQGLTGPLL RHTTPPEVRL  
RIQEELNTYLGT LIDRKLTDPTDDLLSRQIAKHRDNGTFDRASMVSLAFL  
LLVAGHETTANMISLGVVGLLQHPDQLV I IKDDPKTPLAVEELLRYFTI  
ADSVTARVATEDVQLGDTTINAGDGVVISGLAADRDPTVFAEPDRDLDER  
GARHHVAFGFGPHQCIGQTLARMELRIVFDTLFHRIPTLR LAAPLDDIPF  
KSDAFVYGIEELPVAV

>CYP1005A1 (640473840) *Salinispora tropica* CNB-440

MSAVLFRSWTKTAGTHWPAITRVADQQGTEHLVV TQHALVRQVLT DQ LTY  
RPDNALDAVTPI PVAALRVLAGHRFRLPPTLANNGGVSHPAIRALVADAL  
HPAKVAAQR PWTGLVAERVAAIRRTLDSGGSTDLHAELNADLPLLVLAR  
LVELPDAPVS AVKQFARAAL EFWAPLDADRQLALADEVGRFHQV LREFA  
DTGGGLAAALRATGHPPDVLVGALFFLLVAGQETTSQFL TLL LHRLADEP  
TVRAALRADSVSVADVVEEGLRLEPPIV TWRRVA AVDSTLGGSTVAAGTS  
VLLWLARAGRDP AVVPAPDEF RFGQ RGSRRHLAFGAGAHRC LGDQLARME  
AAVVVEQVTPLLDGVTVVRPPWYPDNLTFRMPDAFVVRR

>CYP211B1 (640474137) *Salinispora tropica* CNB-440

MDASEAVALLMSP LGRIDPYPTYERLRAHGPPV VQTAAGFFVVTGYTEADT  
VLRNARLAFEVMDDEL RDDVFPHWQDSPAMKSIARSMIRANPPNHGRMR  
LAAGAFTPRRIAALREV VTAQADELADEMIRAGRDGAPVDFMG SFAYPLP  
VAVICALLGVPAADWARFRGWASDLTAVLEPEITPQELTVADAGASELRD  
YFTELIAQRRRAPADDLTALVQTHDADGDRLSGEELLANLV LLLVAGFE  
TTTNLLGNGLV LLAHPDSATALRDQPELAPGHVDELLRYDSPVQLTTRT  
VRESVLLAGVELPAGSWVLVLLGAANRDPERFTDPTRFDPGRAQSPPLSF  
GAGAHYCLGAGLARLEAQVAFPLLLRRLPELALAGEPTRRNRLTLRGYET  
LPVTVSAIAADHGTPAGVARGTP

>CYP107AW1 (640474552) *Salinispora tropica* CNB-440

MESVTSTSAPPPVPYIADPYPALARIRANGPV SILHSDEGIPMWVIARYR  
NVRAALADPRFGQDARRAQTLADNRVAGVT LGGDVIHMLNSDPPDHTRLR  
HLVQGAFTARRVAAMRPLVERITTSLLDGVGGRQTVDLVQDFAFPLPMLV  
ICELLGFPAEERDAYRSWSTAILTHND DPAAAFATALRDMTDYIEVQLRHR  
RARPGEDLLTELLAARDAGQLTDDEIVGMVFLL LIGGHETT VNL LGTATL  
ALVRNPDQHRWLLANPHALSEAIDEFLRYESP VAMATLRFTTAPVTVDV  
VIPAGELVLVSLGGANRDPDRFPDADRLILD RRDTGHLAFGHGLHRCLGA  
FLGKLEGEVALGALLGRYPGLTLAAEVRQLRWRDTIMLRGLES LPVSLHG

>CYP107AX1 (640474627) *Salinispora tropica* CNB-440

MTSRPTAVFDQCLLRDPHSRYNALRDQAPVHHVLT PDGAPAWLVTRYNDV  
RAAFTDPRLSVDKRFSGTDGEHGSSLPELDAHLLNRDPPDHTRLRLRLAA  
AACTPRRVADLHPAVERIVSTLLDGLAGHDRAELIGSLASPLPLQVMHEL  
LGLPTQANIDFRTWTNTLLSADANQPAQSRAAMANMRFLIEQLAHKRAQ  
PGDDLLTGLLAAREDDRLTDDEL VAMVFLLMFAGYDNTAALIGTVTHAL  
LTNAELHEAVRGGS LALDELIDEVL RWNPAFPLAVRRFAREPITIAGQTI  
PAGDRIWLCLASANRDPAQFTQPD ELGIIGLRSHLSFGHGIHYCLGAPL  
ARLQTTIAVTSLNRFPEMRLAVPAHDIRWRESFRLRGLIALPVYL

>CYP211C1 (640474738) *Salinispora tropica* CNB-440

MLDVEGLLTRLYSEQGRQDPYPVYAGLHAQGAIAALAPRPEGQORVAAVAV  
GYDLVGAVLRDPEWSKQPPPGWMEQEILRTLQSSMMFINPPDHGRMRKVF  
AGTFTPRRLGTLEPVINRVADELDRMADAGPGEVDFVAEFAYPLPARVM  
AEFIGIPATELAWYRDRVDRIDAFLDVAGKTPERLAAAANAAAAELRVFYA  
DLLARRRRTPGEDLISGLVEAVDAGGVQLTEDELINNLIVLFNASFVTTV  
YMLSNGLPVLLEHPEVAAAALADDPDELTAGAIDEILRLQTPVHLLARAAPR  
DTVLGGVPI PQGQNVLLLLIAAANRDP AHFPDPDRFDP RRP GPPSLAFGLG  
LHYCLGA AVSRLEGR LALPRLLSRFPRLRIMEQP VYSGSLFLRGIDKLSV  
SPGGRMHP

>CYP125A15 (640474868) *Salinispora tropica* CNB-440

MTEPRIPVGFDFTDPAVLERRVPREEFAELRR TAPVWWNVQPRGSAGFDD  
DGYWVVTRYADVMASRSDSTYSTRENTAIARFQPGTTRADLEMQRVIML  
NVDPP EHTKLRAIVSRGFTPRAINALRGSLAERAERIVRDAAVRGTGDFV  
ADVACELPLQAI AELIGVPQHRRKVF DWSNQLIGYDDPAYGVDPLTAAA  
ELLAYAMEMANERQLNPSDDLVTKL VNAQIDG EHLTTDEF GFFVMLLAVA  
GNETTRNAITHGMLAFLEHPEQWELFKAERPRSAVEEII RWATPVNVFQR  
TALVDTTLGGQAI SAGQRVALFYGSANFDES VFEEPERFDITRSPNPHLG  
FGGSGAHFCLGANLARLEIELIFHSIADHMPDIRKVAEPRRLRSGWINGI  
REMPVRYR

>CYP208A4 (640474950) *Salinispora tropica* CNB-440

MTVAAAGRTFSGPTGAALLRSLWQLGQDRLGLMTSAARYGDAVRLGVGSR  
SLYFFNHPDHAKHVLADNSGNYTKGLGLVHARRALGDGLLTSEGELWREQ  
RRVIQPVFQAKRVAGQAHAVAEEADRLIARLRARRGRGPVNLTDEFTALT  
LGVLGRTLLDANLDAFTTVGA AFEEMQNQAMFEMASMSVPMWVPLPQQL  
RFRRARRELERIVGRLVADRTARGE GTGADDALSRLIASTRDEPDGVAR  
RRMRDELVTLLLAGHETTASTLGWTFHLINQDPRVRVRLREEAIDVLGGR  
LPEYADLARLTYTKMVVSEAMRLYPPVWMLSRLARDADVVDGYVP PARAD  
VLICPYTLHRHPAFWPEPERFDPERFDPEVTTDRPRYAYVPFGAGPRFCV  
GNHLGLMEAVFVAMVSREFDLVAPVGQPVVAEPMLSLRVRGGLSMTVEP  
VS

>CYP154M1 (640474980) *Salinispora tropica* CNB-440

MRRRCPVVIDPAGTDIHAEGARIRANGSVSQVELPGGVLAWSVTGQQVAR  
KVLSDQRFSDKPRKHWDYLEGRIGQDFPLIGWVLM DNLTAYGSDHSRL  
RKPCANAFTPRRVEALRPAVERAAVELLGELATVSPTESVDLKARYAHPL  
PSRVICDLFGVP EEDREEMLRGGEVNVDTRVSAEEAAAANVERWHQQMLDF  
IEEKRRNPGPDLTSDLIAAQQAE GSRLTDSEMVGTLHIMLATGTEPVKNL  
IGNAVFALLTHPEQLDLVRSGRAGWDDVIQETLRMQAPVAHL PFRFAVED  
VDIDGVTIRRGDPLLNVNFAAIGRDPDVHGD TAAEFDITRADKEHLSFGHG  
VYRCIGQPLALREAEIALRMLFQRFPNLVLAVPPEE VTPQPTFIMNGLDT  
LPVLLKGRA

>CYP107E3 (640475024) *Salinispora tropica* CNB-440

MTIDQEIRKYPFCESPGIGIDPTYGLLRSTEPLARVQLPYGEVSWLATRY  
EDVKTVLTDPRFSRAAAQ GKDQPR TREEMTYEGII GLDPPDHTRLRKLAG  
KALTARRVN AIRADAQRIANEYVDEMI AKGSPGDLVELFALPYPTVICE  
LLGVPFEDRAQFRIWTEGLTSTSEQLMVYAEQLFGYMGKLVAQRREEPTD  
DLLGALVKARDEGDRLTEQELLSIAGVGLLLTG VETVSTHIPNFVYALLT  
HPELMAQLRADRS LVPAAVEELLRMIPLNPAAMFPRYAVEDVTLSGITVR

AGEPVLVSLPGANRDPEVFENPETFDFTREQNPVAFGHGPHHCLGAQLA  
RMELQVALHTVLDRFPDLSLADGDEGVSWKSGLLVRGPSRLLVAW

>CYP125G1 (640475039) *Salinispora tropica* CNB-440

MSTEVVSTGNRADIAHPATYAAGVPYAEFARLRRDKPVSWSVPEAALWRRS  
GEGRILSQPGFWAVTTHEGVVAASRQPEVFSSGRQGAFLADPRTTADLE  
QARQLLVNMDAPQHARVRKLVTAFTTPRAIRALGDSVTAHARNLVERAVR  
QEECDVVADLAAELPLLVLADLLGLPREDRHLLYQWSNNLVGFDDPEYGG  
GDVEAYRKTTFFEAQYALSVAGERRRAPREDLMTLLATSEVDGRRLTDRE  
FCNFWLLLVVAGNETTRHLITGSLVLAALVDNPMQRERLVADDTLLPSAVDE  
LLRWVSPIMQFRRTAIVDTELCTPIAAGDKVVLWYTSANRDAAVFEAPD  
ELRLHRNPNPFLSFGMGPHFCLGAHLARLEARTMLRELAPHLRSRFLTGP  
VVRLESNFVNGVKSPLGSFTGQ

>CYP1004A1 (640475078) *Salinispora tropica* CNB-440

MSTFSLERVACDRMLGLAVRGRGLADSLMRANTARPHLSAAFLATKDDPY  
PAYAELRARGPLTRAELGQWLVTGHGAVSALLRDGRLESMPAEYTRLT  
GDSPGVDFLHRIVLTRTPPEHTRLRRFIGRALGTPVVRRLHDIRIAAATDA  
LLEPALDRGRLDVVTTELAVPLPVGVVCDLIGIPTGDRPAVLTRVTALAKV  
FDAANLSPADLADINTALPWLHDYFGDLLAVRRAGSGGPTLTEMWEEESA  
SDRLAVADFVDNMLFLFHAGFETTMGLVSNVGAALLNNPEQLGRRLRADPA  
LVPSAVEEFLRYDAPIQNVIRVARKPVEVAGQKIRAGRTVLLLLGAANRD  
EEVFADAERLDVGRDPNPHLGFGGGLHHCVGTLARLMMAVVVFERLVDRV  
TVLGPAAPAVRRRHASLSYDHLPLAVAAR

>CYP1004B1 (640475082) *Salinispora tropica* CNB-440

MTTSALAPRFDALDPNVVEDPYPEYARLRAAGPLCRLGPGSWGVTREFADV  
TNLQHDPRLGSEFFAGYHEISVGDGPASAFFQVRMLYRDPPDHIRLRLRM  
SGAFTPAVVRRLRSHIEDLVDELLAPALAAGRMDLVPELAYPLPVRVVC  
LMGIPPESTEDVRHHATNIGRAFTAVVPEQARTEADEAVSWLREHLGALL  
EQRRSHRGDDLLSRLDLAEESSGDNLSADEIVDNTVFSFFAGFETTVHMIT  
TGTAALLAHPDQLARLRADPSLVTTAVDEFWRWDAPIQGTARYVREPIEI  
GGRTIRRGVVLVLMIGSANHDERRFAQPDRLDVGRQDNPHVAFGGGAHL  
LGAFLARMEGAVVFDRLARLAVLEPDGPTVREPNTPFRAVASVPVRIGDR

>CYP107AY1 (640476690) *Salinispora tropica* CNB-440

MSQDPTMRAELAPIPRSGARLGQEYDQLRNAGDVHQVLLPDSSSLAWLVTN  
PKLVSRALTDPRALNRRHRSRGSWSGFALPPALDANLLNLDAPDHTRLRR  
LVGPAFSPQRVSAALRPRIIRRTAEHLDTLVATSGPVDLVGTGYCTPLSVQV  
IADLMGVPEAGRADLRTWTDMLTSYPPDRDAIRQAVVELHGYVVDLIDT  
KRQQPGDDLLSALVTIEQDGDRLTRDELTSALFLILFAGYENTANLIAST  
VLRLLDHGGLRGVQLPEAIEETLRLEPPAPAAVRRFPTEEMTIGGATIPA  
GDIVLLSIAAATRGTAGNAARLAFGNGPHFCLGAALARVEAEEALTVLAR  
RLPDLALALPVAQVRWRPTFRTHGPAELLVTW

>CYP125A41 (2562111514) *Salinispora arenicola* CNY690

MTEPRIPAGFDFTDPEVLAHRVPREEFAELRRTPVWWNAQPRGSAGFDD  
DGYWVVTRYADVMTVSRSDTYSTRENTAIARLRPDTTREDIEMQRVIML  
NVDPPHETKLRAIVSRGFTPRAINALRGSLAERAHIVRDAAVRGVGDV  
TDVACELPLQAIELIGVPQHHRKVFWDWSNQLIGYDDPAYGTDPLTASA  
ELLYAMEMAEERQSPSDDLVTKLVAQIDGHELLTDEFGGFFVMLLAVA

GNETTRNAITHGMVAFLDNPEQWERFKAERP KSAVEEII RWATPVNVFQR  
TALVDTV LGGQAI SAGQRVALFYGSANFDEAVFEDPERFDITRSPNPHLG  
FGGSGAHFCLGANLARLEIELIFNSIADHL PDIRKVAAPQRLRSGWINGI  
RQMPVRYR

>CYP211C1 (2562111660) *Salinispora arenicola* CNY690

VVDVEGLLARLYSAQGRQDPFFVYADLHAQGPIAALPPEPERRRVAAVAV  
GYDLVGAVLRDPEWSKAPPPGWTEQEILRTLQTSMMFINPPDHGRMRHVF  
AGTFTPRRLGALEPVVNRVDADELDRMADAGAGGLDFVAEFAYPLPARVM  
AEFIGIPETELDWYRERVVIDAFLDVAGKTPQRLAAANAAGAE LRAFYG  
ELLAHRRRTPGEDLISGLVEAVDAGGVALTEDELISNLIVLFNASFVTTV  
YMLSNGLPVLLAHPEVAAALATDPVLTAGAVDEILRLQAPVHLLARAAPR  
DTVLGGVPI PQGQNVLLLLIAAANRDP AHFPDPDRFDPRRSGPPSLAFGLG  
LHYCLGAAVSRLEGR LALPRLLSRFPRLRIMEQPVYSGSLFLRGIDKLSV  
SPGEGSTRE

>CYP244A4 (2562111846) *Salinispora arenicola* CNY690

MSTTTNTELTEAPETNMPVDPLFDCMPDLIAAARVAPVVRIPYLGRHAW  
VVC DRELVKQAL THPKMGKDITLVPEWMRQPGLMVTAQPDPEYARAMIMS  
DGENHARIRRIHAPVLS PRNTERWGERVADKVEGFLDELSQAGSGGSAEV  
NVVTNYTHKIPLAFISEMLGLPPEAEHRLRGITDIMLYSSDYAARREAIG  
GLFGAVEDWVRNPADLRDGVITGLLAASDGPDAAVTEGEVIVWTLGMIIT  
GYETTGS LISTS LYEAIRRPPHERPKTDEDITAWIEETLRVHPPFPHPHTW  
RFPLEDIELGGYLIPKGS PVQVSIAAANRKPGE GADSFEAERRGHGHLSE  
GLGMHYCIGAPLVRLEAQIAVRGFLRRFPQARLSAESAVQWESEWMIRRM  
SVLPAVLS

>CYP245A7 (2562111850) *Salinispora arenicola* CNY690

MPSATLPRFALTGWNRENIVNPYPVYQRYREVAPVHRGEPGGDAPDTFYV  
FSYDEVVQVLSSSCFGRGRSLDAAQASVPVPAEQKALRAIVENWLVFMDP  
PRHTELRSLLNRSFSPRIVTEL RPRIARIAQELL SRLGQQVDVDLVESFA  
APLPILVISELLGIPEERRAWLRANAMALQEASSSRAGRDVDGYARAEVA  
AQEFTEYFREQVRLRRGSAGGDLITILANAQERGAPVSLDAIVGTCVHLL  
TAGHETTTNSLAKAVLALREHPAVLDELRGADGLTTDAVEEFLRYDPPVQ  
AVTRWAHQD TTLGGCDVPRGSRVVAL LGSANRDPARFPLPDVLDVRRPAD  
RHLSFGLGIHYCLGATLARAELEIGLRALLDGVPTLGYGTQHVDYADDLV  
FHGPSRLVLVNLGER

>CYP211B2 (2562112171) *Salinispora arenicola* CNY690

MDVSEAVAVLTSPSGRLDPYPTYEQ LRAHG PVSRTTAGL FVVTGYAEADM  
VLRDPRFVVLDDDLRDDVFPHWQDSPAIKSIARSMRLTNPPDHSRIRRLA  
AGAFTPRRVAAMREV VTAQADELVDEMIRAGRDGARVDFMDMFAYPLPVA  
VICALLGVPAADRSRFRRWAGDLTGILEPEITPEELAGADAGADELRDYF  
TGLIEQRRRAPADDLTALVQAHDADGDRLSGEELLANLVLLVAGFETT  
TNLLGNGLVLLTRPEAAAALRDQPD LAPGYVDELLRYDSPVQLTTRTVR  
ESVSFAGTELPA GSWLLVLLGAANRDP RRFDPARFDPWRAQSQPLSFGA  
GPHYCLGAGLARLEAQVAFPLLLRRLPELALAGRPSRRTRLT LRGYETLP  
VTVGAVTADRGT PAGVAPGTP

>CYP105W3 (2562112710) *Salinispora arenicola* CNY690

MTGYQDPPTGDQPGAPVPSGSTDPGLDAFPLPRRCFFSPPAEYARLRAEH



PVVRLPMLGGDTAWVVSRRHADVRQVLGDPRMSADRRRPGFPGKFAPTTEGQ  
RQASFANFRPPLNWMDPPEHAICRRQIVDEFSARRVRQLRTLVERVVDH  
LDALAAAAPGADLVSTFAYPVPSQVICEVLGVPHYGEHGFERRSTLMFRR  
STPADERARCAREIREFLDAVVTDKERRPGDDVLSRLLYRQRSAGGVDHE  
AVVSMAFVLLVAGHVTTSNMLALSVLALLTHPARLARLRAEPKRFPAAVE  
ELLRYFTVVEAATARTATAEVTIGGVTTAAGEGVVALGQAANRDPRVFEH  
PDEFDPDRDARAHLAFGHGRHICPGQHLARLEMEVALSRLFRRLPGLRLT  
MKVSDLPLKEDSNIFGLYALPVAW

>CYP248A2 (2562112718) *Salinispora arenicola* CNY690

VLADAVTAFDPTAVDVRRDPYPSYHWLLRHDPVHRGAHQVWYVSRAFADVR  
AVLGDERFARTGIRRFWTDLVGPGLLSQIVGDIILFQDEPDHGRLRGVVG  
PAFSPSALRRLEPTIEATVNDLLRPARALGAMDVVADLAYPLALRAVLGL  
LGLPAGDADAVGRWSRAVGRTLDRGATAEDMRRGHAAIAEFADYVERALA  
ERREDGADLLALMLAAHRSQLMRNEIVSTVVTFTFTGHETVASQLGNGL  
LSLLDHPEQSELVRRQPHLVSQAVEECLRFDPVQSNTRQLAADVELHGR  
LLRRDDVVVVLAGAANRDPGRYDRPDEFDIRRDPVPSMSFGAGMRYCLGS  
YLARLQLRTALGAMVALPDLRLVCSPNELAYQPRTMFRGLTRLPVAFTPA  
G

>CYP107FS2 (2562112780) *Salinispora arenicola* CNY690

MPVPQGEQNLTTTEVFADPKALFATLGSRQPLHRISLPDGMFAVLVTGNRE  
ARQALSDPRLVRSITAAAPELHKYHPLASDDYALSRHMLFADPPDHGRMR  
KLVSTAFTRRRVEQMRPRIQQITDDLDVVAAKGEADLVEALALPLPIAV  
ISEMLGVPPFADRSEFERHAEVLGTGINASSGFDIAAAGRWFDEYLAGLVQ  
QRRREPQDDLISGMLAAQDKGDRLTDVELRSNALLLSAGFETTVNLVAN  
GLLALLRHPEAMAALRSEPNLMTTAVDELLRYDSPVSCVTYHFAQEPVEI  
GGFEIRSGEHVVIAAAAANHDPTVFADPSRLDLRRQGSQILSFSGIHF  
CLGAPLARLEGEIAFGTVLRRLAGRLAVPTDSLIVWKASFVLHRLERLPV  
TFTPDRDPNPIDSVHTV

>CYP105CN1 (2562112781) *Salinispora arenicola* CNY690

MAAPAPQATQSTTPHPPSYPLPRECPYRPSAGTARLRDAGPVSTVRLYDG  
RTAWLVTGAAEARALLADSRVSNRADFPNYPVMDERHLSMRATREMAREE  
EGGFAAALFGMDPPEHTRQRQLLPRFTVRQVAARRPAIQRIVDEHLDAM  
EANGSPADLVSAFATPVPTMVVCTHLGVPHYQDRTRFEPVAVAGLFEPDRAD  
AAMAELTAYLHQLIETKQSEPGDGVIDHLIANHLRPGAIDRAELVAIASA  
ILVAGTVTTSSAIALGTLALLTAPGQYAALVDNPDLPVPGAVNEILRYLSL  
VEQLARVATEDIEIGGKLIRAGDGIIVSFAAGNLDPNVTTHPDRLDVALP  
PTNHLAFSHGIIHHCIGQNLALLELDIAFRALVNRFTLRLAVPAEQLPY  
FAGDVPRLACLPTW

>CYP105CP2 (2562112783) *Salinispora arenicola* CNY690

MTKSMPVQDLPAFPIPRECPYRPSAQHVSLRSGGPMKVRLYNGRTAWLV  
TDSA HARAVLSDYRRVSIKPYHGNYPLLNEEFKVVDSGYADVLFGVDP  
EHTRQRQMIMPSFTLRRTAVLRPDIQRIVDDKLDMMRHGAPGDLVTEFA  
QPVPMSMVSFLLGVWPEDHEEFETPAHKLFVPELAEETTEL GAYLERLI  
QKKEQPGGTPGGTGLLDDLIRDHLRAGALSRLDELVHIAMAMLVAGTDTT  
NVISLGTALLDNPDQWEALRDNPDDELIPGAVEEILRYTSLIEAFARVAV  
SDIELNGAVIKEGEGILISSAGVNFDPALAPDPGRFDIRRPPRPSFSFSH  
GIHRCPGDNLARLELEIAFRSLVTRMPNLR TAKPIDQIPSNNDGTLQRL  
YELPVVW

>CYP105CT2 (2562112862) *Salinispora arenicola* CNY690

MNSPNHMPADSSSTAPARGCPMALSRGRVGLDVTDEISELRDGGRLGRIT  
TAFGQEATLITRYDEVRAQMADSAVFNVAGVSPPPVLVDGGFDTESVRRR  
RTVGNLIMLDPPEHTRLRRMVAAWFTTRRVERLRPRVVEIINAALDEMER  
SGPPVDLVAMFAKTVPITVICELIGVPEELRERYRRRAERAASASAVSTP  
LDELRLREAGWVSRELIEYHRENPSDDIIGMLLREHGADSHDDGITDDE  
LVGLANALLIAGHETTTQMLSMGTLALLRHPDQLALLRDDPSIVAGAVEE  
LLRYVGVLLHGGFVRVATRDTRLGGHRIHAGELVVPALTAANRDPRLTLDG  
DRLDITRPPTSHVAFGHGVHFCIGAPLARMELEAFALLRRFPGLRLAV  
PDSELEFTQGTTVYSLRGLPVTW

>CYP154M5 (2562112878) *Salinispora arenicola* CNY690

VEQSCPYKLDVTGRDIIHAEGEAIARARGPVAQVELPGGVQGWSVTGYQAAR  
QVLADPRFAKDPQKWPAYTSGAIPPTWPLIGWLLMDNMTTNDGADHQRLR  
KLVSHGFTPRQVERTRPLIVKIVNDLLDGLSTAGPDEVVDLKGRAFATPLP  
ARVICDMFGVPEALRASVLRGAQVNVTSISGEEAEANVEQWHRELELV  
EAKREKPEDDMASLLIAAKEEDGSTLSQEEVVGTLHMLGAGSETLMNAL  
SYAVLGMLSNPGQYEMVRNGSSSWDDVIEETLRAQAPVAQLPLRYATEDV  
AVGGAVIKAGDPVLMGFTAIGRDPVHGETAGDYDITRADKTHLSFGHGV  
HFCLGAPLARLELKIALPALFERFPNMTLAVRPDQLEPQGTFFIMNGHREL  
PVRLGQPATVLA

>CYP208A12 (2562113589) *Salinispora arenicola* CNY690

MTLDTITPRVPLGPRTAALRMLLVMKRDRLGMLTSAAARYGDASRLPVG  
HKALWFFNHPRYAKHVLADNSANYHKGIGLVHARRALGDGLLTSEGDLWR  
KQRKVIQPAFQSRRIAQQAGMIAEEAFALVERLRARAGTGPPVELTAEITG  
LTLGVLGRSLLDADLAGFDSIGDSFATVQDQAMFELETNAVPMWIPLPR  
QIRFRRARRKLQAVVDTLVDGRAGSLADRVDVLSRLILSARGEADPRVGR  
ERLRDELVTLLLAGHETTASTLGWTLSLIDRHPGVWERLHAEAVEVLGDR  
LPEYDDLRLRLRYTVMVVEEAMRLFPPVWLLPRRALAPDTIGEYRVANAD  
VVISPYTLHRHPEFWPNPERFDPERFAPGQAADRPYAYLPFGAGPRFCV  
GNNLGMMEAVFVIALLCRHLRLTGVPGYRLVPEPMLSLRIRGGLPLVVRP  
VS

>CYP105BL2 (2562113820) *Salinispora arenicola* CNY690

MSSHAAAAPDPETATPLHTLAPELTFPQFERSTPFDPPQAYTELSGRCPV  
APVMSMDGKPSWLITSFEGVRTTSLSDPRFSSDMSHPGFPNRTGKPVDDL  
KDTLGAMDGERHRYRRMLTGELTVRRAKAMRPVITQITDEALDQLAAGV  
PGADLVKHVALVPSRVAYHLVGIPSSDYELFTGMATTLMESTSSADQFA  
ALQNMVSYFDTLVTDREHHDRDDLGRMVRRYLATGELTRDMLITLVWTT  
LAAGQETTAHMIIGLVAALLRHPDQLELLRREPHLLPGAVDELMRYLPMI  
QFGIPRVAMDDVKVDGQTVTAGEGVVALPPLANRDPVFERPDELDVRRN  
ARQHLTFGYGPHQCPAHALARLELEVYGRLLERFPTLRLADSDADLKVR  
DEDIMYRVSELAVTW

>CYP105AB35 (2562113949) *Salinispora arenicola* CNY690

MTETASSRLTDTEFPVQRQCPFAEPVEYEQIREQSSIAMVRLTGGGEAWW  
ISGHEQGRAVLADRRFSSDRKANFPFISTDPATRKRLYAQPLSMISMDG  
AEHAQARRALIGEFTVRRLAALRPRIQQIVDQCIDEMLTDDQHCVDLVKA  
LSLPVPSLVICELLGVPYDDHDFQEHATLVRRNAAPEVRQHSIDELNA  
YLGALIDRKLANPVDDLGRQIARQHQDGTFRSSIVSLAFLLLVAGHET

TANMISLGVVGLLQHPDQLTMIKNDPDKMPLAIEELLRFFFTIVDSVTSRV  
ATEDVRFGDTTINAGDGVVVSGLSADWDPTVFADPDRLDLERGARHHIAF  
GFGPHQCIGQNLARLELQIVFDTLFRRIPTLRLAAPLDKIPFKTDAAIYG  
ARELPVAW

>CYP107EU2 (2562114108) *Salinispora arenicola* CNY690

VTVGQTLPLVYSPEFTRDPYAVFARLREQAPVCRVTTHRGMSAWMVTRY  
ADVALLADSRKADGNRIGELMPRHSLTGAATGFPPGLTTNMVNSDPP  
DHTRLRHLVGREFTGHRVESLRPRIEEIVDDLLDGVAACGDEADLAEILS  
RRLPIAVIGELLGVPEADRAEFFRWADTLYGGTASPEALGQAYNAIVDYL  
GRLCDAKRDVPADDLLTALVQVSADEDRLSREELVSMALLLLLVAGHETTS  
KQISNGVLALLLDPEQLKLLKAQPALAAGAVEELLRFEGPSLSASLRFTT  
EPVEVAGVVIPEGEFVLLSLASGNRDPQKFPDPDRLDITRSTQGNLAMGH  
GIHHCVGAALARLELEIVLSRLVARFPQLQLAVAADDLEWLVNSFFRAPL  
HLPVSLGR

>CYP107AY14 (2562114503) *Salinispora arenicola* CNY690

MTAELTPIPRSGAQLRQEYDQLRKTDGVHGVLLPDASLAWLITNPEVAAR  
ALADPRLALNRRNSRGGWSGFALPPALDANLLNLDAPDHTRLRLRVGPAF  
SPQRVAGLRPGIRRAAEHLLDTLVATSRPTDLVTGYCNPLSVQVIADLMG  
VPEAGRNLRAWTDMLTSYPPDRDAIRQAVTELHGYYVDLIDLKQQQPG  
DDLSSLVLVTIEQDGDRLTRDELTSLAFLILFAGYENTANLIASAVLWLLD  
HGGLNEVPIDAEIAIEGTLRDEPPAPVAIRRFPTEDIIIRGLTIPAGDTVLL  
SIAAATRGADGNAARLAFNGPHYCLGAALARVEAEEALTVLARRLPGLT  
LAVPPAQVRWRPTFRTHGPAELLVGW

>CYP1005A1 (2562114613) *Salinispora arenicola* CNY690

VSAVLFRSWTKTAGTRWPDVTRVADQSGTEHLVVTRHALVRQVLTDAQTY  
RPDNALAEAVTPVPVAALRVLAGHRFRLPPTLANNGGVSHPAIRALVADAL  
HPTKVAAQRPWLTTELVA DRVATIRTTLDSSGPPVDLYADLTADLPLLVLAR  
LVELPDAVPNAVQKFARAALFVWAPLDADRQLALADEVGRFHQVLRFEFA  
DTGGGLAAALRATGHPPDVLVGALFFLLVAGQETTSQFLTLLHRLTDEP  
TIRAALRAGSTSVADVVEEGLRLEPPIVWRRVAAVDSTLGGTTVAAGTS  
VLLWLARAGRDPVVAAPDEFPRPGQRGSRRHLAFGAGAHRCCLGDQLARME  
AAVVVEQATPLLDGVTVVRPPWYPDNLTFRMPDAFVVRR

>CYP105CH2 (2562115214) *Salinispora arenicola* CNY690

VSSLPLPTYPKLRDPADPLLPPADYLAIQSEKPIAKVLLPSGRPTWLITG  
HALARQVLTEPCVSVDKHPNFYPVPNPDAVVAQVARWTYILLGDDPPL  
HTERRRLLISEFSVRQAQAMRPRIQQLVDFHLDQLIAAGPGADFSKHFAM  
KVPSAVICEMLGVPFADHDYFQERTALQLRRDVAVADQKQAIDELLAYFE  
QLIQRKSSHPGDDLRLIVSNRETEAFDHEALVALGLLLLVGGHETTAN  
TLTLATATMLERPEVAEQLRDPSLMPSAVEEFLRYFSVAVAVSRIATAD  
LQVGDQLVRAGESMLLVNLTARDGTVFPEPHRLDIHRNARNHLAFSHGI  
HQCMGQNLARVEMQIALDTVLRLRLPGLHLVTPFEELPFKYRHLVWGIEEL  
KVAW

>CYP105G7 (2562115417) *Salinispora arenicola* CNY690

LTIIETTETPPADDTLRAPLPRQFMQRDDPSKLPPALAALAEQAPVGRSTL

PDGDPFWMVSGYDEARAVLSDFRFSDDRFYHPRFKKISGQLGERLRNDK  
ARAGSFINDPPEHTRYRKLLTGQFTVRRMRQLTVRIEQIVTEQLDVMLA  
KGNSADLVSAFAVPVPSFMICELLGVRYEDRTEFQRRRAAGLLQTDLPKQ  
AVENLEAQRAFMQRLVTDKRRNPADDMISGLVHHAGADPPLTDDDELVGIA  
TLLLFAGLDDTTASMLGLGMFMLLQRPEQMAVLRDDPPRIGDAVEELLRYL  
TVVSAGLFRFAKEDVVLGDEHIPAGSTVVVSLMAANRDGRHWPEPETLDV  
TRVRSSHLAFGHGVHQCLGQQLARIELTVGITELLRRLPNVRLAVPPADV  
PLRNDMITYGVHRLPIRWDTP

>CYP107Q4 (2562115418) *Salinispora arenicola* CNY690

MTTTAETS AETID LFSPEVVADPF GWYARLREETGPTTGTLNIGTMMGGP  
EMWLVTTRYEDVRQVLTDP RFLTNPPADSPLEDIRAGVFKRLDFPPDLIPW  
MANLLNVSDGEDHTRLRLKLVSYALTAHRIGKLRPRVEKITADLLDKLAED  
GKDGSPVDLVEEYCYPLPVTVICELVGIDE PDRAHWRAWGDSMATMNGER  
IPTTLVKCIELARELIEKRAEPQDDLVTALVQAQAE DQNRVSDDEIIGI  
LFSLVTAGHQTTTYLIGNSVILLLENPDQLARLKENPSMWPQAVRELQRL  
GPIQFAQPRFPSEDIELGGVTIPRGAPVAPLLLAANTDPRRFPDPNKLI I  
DRLAVGSESHLGF GKGIHRCLGQH LAYQEA E VALQGLFTRFPDLSLAVPR  
EEIPWILRPGFTRTRTLPLKLV

>CYP166A4 (2562115591) *Salinispora arenicola* CNY690

MTDAISFELPWARTDKFDPPAVFDALREQRPLARMRYPDGHIGWIVSSYE  
LVREVLGDPRFSHSCAVGHFPVTHQGQVIPTHPQIPGMFIHMDPPEHTRY  
RRLLTGEFTVRRTSRLTGHVGEVAAEQIEVMREHGAPADLVATFARPLVL  
RVLSGLVGLPYGERDRYLHAVTLLHDAEADPAEAAAAYEQAGAYFAEVIE  
RRRRQPEDDLISTLVGDGELTGEELRNIVTLLLFAGYETTESALAVGMFA  
LLHHEDQLARLRADPTKIDAAIEELLRYLTVNQYHTYRTASEDIELHGEV  
INKGDSVTVSLPAANRDPARFACPADLDIDRETSGHVAFGFGI HQCLGQN  
LARVELRAGLSALLRAFPNLRLAVPADEVPLRLQGSVFAVKNLPVCW

>CYP1051A4 (2562115888) *Salinispora arenicola* CNY690

MATDAAITRARAVPAWKALPAAVRDTHRALVDVGNWSDGDVVRVSLGVSR  
PYVVTNPAHVQEVLHERAAIYPRGDDTALWRSVRKLVGDGILAEGDAWAA  
SRRVLAPMFRPVRINAMVDTMADAIAGAVDDLHGA AVAGTPIDVGRELSR  
IVCSAIMRVFFADRITVQDALRIMKAQETIVTAMAPRILAPLVPWWIPMP  
GDRRFRTAVRSIDNILLPVLHQARQRPDDGDDL SRLVVRADDDGQVLSE  
KRMRDDLVSMVAVTETSTVVLTLWLPLLANHPDVADRLYDEIDRVVGGG  
PVRGDHLAELTYTRMVDELRLRYPAGWILPRRAATDVLGGVRINKGAT  
VILSPYVTQRMATAWWGPTAEAFDPERFAAGREAADGRHRYAYYPFGVMH  
RCLGEHLFNLEAILIVATLLSRFRFALTDTSMPGVKVAASTRPARTVEMI  
L

>CYP1198B2 (2562116325) *Salinispora arenicola* CNY690

MSGELTDQRAAPDVGGNPLRSLLDHGIRANPYPLFGELREAGPTAVEDGS  
VVLFG EYEHCSQILRHRDMGSDTSEAPSIKGFVVDDAERAGSSIFFMDQP  
GHGRQRKLVS KSFTPRIVQSFGPQITRIVDGLFEDFQDKGELDVVTDLAY  
PVSIGIICDLFGIPDDERDMLKEWSDDLALSTELPTLGAAIGVLNVFTRD  
EINRFGSVAMAAHAYFADLIHRRRKNP GDDLVSLLATESNGERLTRFEV  
TSVLATLFVAAHESTTNLISGGILALLRNQDQMTVLRENPGVITNVVDES  
LRYDPPVHLAARMARARTTIGGYDLDPGSIVVVLMAAGNRDPRAYENPDV  
FDVNRKIKNVSLAFGAGAHFCIGSGLAKLEAEIAISAF AQRLKNPEVDES  
SLEYRRHIVVRGLEHMRVSFQPKPVAPIPAR

>CYP107AW7 (2515996764) *Salinispora pacifica* CNT603

VETVTGTSTPPPVPIADPYPTLARIRANGPVSIHSDEGIPMWVIARYR  
DVRAALADPRFGQDARRAQALADNRVAGVTLGGDIVHMLNSDPPDHTRLR  
RHVQGAFTARRVAAMRPLVERITTSLLDGLTGRTTVDLVQDFAFPLPMLV  
ICELLGFPAEERNAYRSWSTAILTHDDDPAAAFATALREMTDYIAVQLRIR  
QTRPGDDILTELLAARDAGQLTDDEIIGMVFLLLIGGHETTVNLLGTATL  
ALMRNPDQHRWLLANQHALPEAIDEFLRYESPVAMATLRFTTTPVAVDDV  
VIPAGELVLVSLGGANRDPDRFPDADRLILDRRDTGHLAFGHGLHRCLGA  
FLGKLEGEVALGALLRRHPRALALAADVRLRWRDTIMLRGLESPLVSLHG

>CYP107AX4 (2515996778) *Salinispora pacifica* CNT603

MTSQPAPVFDQLLLRDPHRRYNALRDEAPVHHIRTPDGAPAWLVTRYDDV  
RAAFIDPRLSVDKRLSSTDGEHGSSLPPELDAHLLNRDPPDHTRLRLRLAA  
AAFTPRRVADLRPAVERIVSTLLDGLVGHDQAELIGSLASPLPLQVMQEL  
LGLPTQTSVDFRRWTNTLLSADANQPAQSRSAMANMRRFLVEQLAHKRAR  
PGDDLLTGLLAAREDDRLTDDELVAMLFLLMFAGYDNTAALIGNVVHAL  
LTNTELPAAVRTGSLALDELVDGVLRWNPSPFLAVRRFAREPITIAGQTI  
PAGDRIWLCLASANRDPAQFTAPDTLGTTGMRRPHLSFGHGIHYCLGAPL  
ARLQTTVAVTILLDRFPGIRLAVPAHDIRWRESFRLRGLVALPVFL

>CYP164C2 (2515996940) *Salinispora pacifica* CNT603

MTARAGSVAEDI IQLADRMGREDPYPVLRMRQASPYVALPGLVVAGTHA  
TCSAVLRDPGMSSERQATLAPAARGPRTRNFLHLDPPDHTRLRLRLVSKV  
FTPRVVATMEPHIRRTTDDLLTAAARGSMEEVADLAYPLPLRIICEVLG  
VPAEDHHLVQHWSARLSEALEPPIPGLVSTTTSTEAARARAGFIAYFQAL  
IADRRRSRPRADLVSQLVAVEDASERLDSSDILATCILLINAGHETTVNLI  
ANGVLALLRHPEQLADLRAEPGLAAATVDEVRLYDAPVQITSRVAKHDTR  
LGAADVVRAGDMVLLLGAAANRDPVYPDPDRFDIRRRSPVPHLAFSAGAH  
FCLGAGLARLEAQIALSAVAARLREPRLRAGGVSYKPNLSLRGPDVLTVD  
FDDVLAPGRRDGQEANG

>CYP125A65 (2515997482) *Salinispora pacifica* CNT603

MTEPRIPVGFDFTDPAVLERRVPREEFAELRRTAPVWWNVQPRGSAGFDD  
DGYWVVTRYADVMAVSRDSEYSTRENTAIARFQPGTTQADREMQRVIMI  
NVDPPPEHTKLRAIVSRGFTPRAINALRGSLAERAERIVRDAAVRGTGDFV  
TDVACELPLQAI AELIGVPQHHRKVFWDWSNQLIGYDDPAYGVDPMAAAA  
ELLAYAMEMANERQRNPSDDLVTQLVNAQIDGEHLTTDEFGFFVMMLLAVA  
GNETTRNAITHGMLAFLEHPDQWELFKAERPRSAVEEII RWATPVNVFQR  
TALVDTTLGGQAITAGQRVALFYGSANFDES VFEEPERFDITRSPNPHLG  
FGGSGVHFCLGANLARLEIELIFNSIADHMPDIRKVADPQRLRSGWINGI  
REMPVRYR

>CYP211B11 (2515998070) *Salinispora pacifica* CNT603

MDASEAVALLTSPPGRLDPYPTYERLRAHGPPVSTAAGFFVVTGYTEADT  
VLRNPRFEVMDDEERDGVFPHWQDSPAMISISRSMIRANPPDH SRMRRLA  
AGVFTPRRVAAALREVVAQAADGLVDEMIRAGRGGAAVDFMGSFAYPLPVT  
VICALLGVPTADWARFRHWASDLTGVLPEEITPQELAIADAGASELRDYF  
TELIAQRRRAPADDLTALVQAHDADGDRLSGEELLANLVLLLVAGFETT  
TNLLGNGLVLLTHPDSATALRGQPELAPGYVEEFLRYDSPVQLTSRTVR  
ESVSLAGVELPAGSWLLVLLGAANRDPARFTD PARFDPRAQSPPLSFGA

GAHYCLGAGLARLEAQVAFPLLLRRLPELALAGEPTRRHRLTLRGYETLP  
VTVGAVPADPGTPAGVALGTP

>CYP1005A6 (2515999114) *Salinispora pacifica* CNT603

VSAVLFRSWTKTAGTHWPAVTRVADQQGTEHLVVTEHALVRQVLTQVQTY  
RPDNALDAVTPIPVAAALRVLAGHRFRLPPTLANNGGVSHPAIRALVADAL  
HPAKVAAQRPWLTELVAERVAAIRATLDSGGSADLHAELSADLPLLVLAR  
LVELPDAPVSAVKQFARAALFWAPLDADRQLALADEVGRFHQVLRFA  
DTGGGLAAALRATGHPPDVLVGALFFLLVAGQETTSQFLTLLHRLAGEP  
TVRAALRDGSVSVPNVVEEGLRLEPPIVTWRRVAAVDSTLGGTAVPAGTS  
VLLWLLARAGRDPDIVSAPDEFRRPGQRGSRRLAFGAGAHRCGLGDQLARME  
AAVVVERVSPLLDGVTVVVRAPWYPDNLTFRMPDAFVIRRGFAGAAER

>CYP124M3 (2516000068) *Salinispora pacifica* CNT603

MTVPIELDAVDLSDNDFWTKPLEYRHAVFNALRAQPGLPHFASPEFGSAP  
RGRGYYALTRMDDVLAVSRNPSVFIISGKGNVAMEVPAEFLDQSLITMDNP  
RHARLRRIIVSRGFTMKAVTALMDNASQMAKQIVDEVVERGECDVVDISA  
KLPLGIIICNMMGIPDSQQQFVFEQTNVMLGVQDPEYVGEQNDAMLAMSV  
SQELADLMHELATLRKNPTDDLIISKLLSAEVNGEALTPSELAHFFILLT  
GAGTETTRNAISWGIQLLTQSPEQREAWLSIDIGVTPTAVEEIVRWSSPV  
ISQRRRTVAEDAEPVKLAGQLLGGPGDKVLMFYGAANRDPNYFVHPEGFDVR  
RSPNPHVGYGGPGPHFCLGAHLARLEISVMFRELLTRIPDIHATGEPARL  
KSPLINGIKRLPVAFTPGAR

>CYP208A22 (2516000089) *Salinispora pacifica* CNT603

MTVIADRGGRIPPGPPVTAGLRLLLLALGRDRLGMMTSAAAAYGDVARLPV  
GPKKLYFFNHPDHAKHVLADNHANYQKGIGLVHARRALGDGLLTSEGELW  
RKQRRVIQPAFQNRRLAQYAGAVGQEATRLVARLATRVDPGPVDVLD  
RLTLGLVLRGRTLLDAELTGFGHVGESFAAVQDQAMFELETNTVPTWIP  
LRQRRFRRARQHLQEVVDVLAERGQAVEGRDDVLSRLILSTRAEADPQLG  
RERLRDELVTLLLAGHETTASTLGWSLHLLDQHPELRERVRHEARTVLGD  
RVPAYEDLHQLRYTAMVVEEAIRLYPPVWILTRKARAEDEIGGYRVPAGA  
DILICPYTLHRHPRFWAEPERFDPERFDPSTTDRPRYAYIPFGAGPRFC  
VGNNLGMLEATLVLAVLLRDLRLEGLPGRAVVPEPMLSLRVRGGLPMTVR  
RVD

>CYP244A10 (2516000206) *Salinispora pacifica* CNT603

MQDTAQANLAEAPEVRMPIELRPTDCLPELLAAARVAPVVRTPYLDQHAW  
VVCDELVKQALTHPKLGKDVALAPDWMRQPGQMTAMPPEYARMMVMS  
DGEHHARIRRIHAPVLSRPNTERWSERVAALVDGFLDNLDSADGTEVNLI  
TDYTHKIPLAFTAEMGLPPGAERRLHDITEVMLYSADYALRQQAVGELF  
EAVQEWVRDPAGLRDGVITGLLASADGPDATVTKGEAIVWTLSLIINGYE  
TTGSLISAALYEALRRPARERPHTDEAVAAWIEETLRVQPPVPHTTWRF  
A  
LADLDLGGYLIPRGAPVQISLAAANLDPDEDADSFDAQRRGRGHL  
SFGLG  
AHYCIGAPLARVQTKIALRGFLRRFPQARLSLDTAPRWESEWMIRMSVL  
PVLLA

>CYP107AY9 (2516000227) *Salinispora pacifica* CNT603

MSQDQPTRAELAPIPRSGTRIGPEYDQLRKTDGVHQVLLPDTSM  
AWLVTS  
PDLVSRALADPRLALNRKHSRGGWSGFALPPALDANLLNDAPDH  
TRLRR  
LVGPAFSPQRVAALRPRIQRTAEELAETMVATGSPVDLVTGYCTPL  
SVQV  
IADLLGVDPDAGRTDLRAWTDMLTSYPPDRDAIRQAVVELHGYV  
VNLIEA

KQQRPGDDLLSALVATEQEGDRLTRDELTSIAFLILFAGYENTANLIAS  
VLRLLDHGSLRGVRVSEAIEETLRLEPPAPAAIRRFPTTEMTIGGATIPA  
GDTVLLSIAAATRGADGNPARLAFGNGPHYCLGAALARVEAEEAITVLAR  
RLPGLALAVPGAPVRWRPTFRTHGPAELLVAW

>CYP161N4 (2516000407) *Salinispora pacifica* CNT603

VNTVAQLPFTQTHVLDVAPALRLLQSRGKVHRVRTPEGVPAWLVTGHAEV  
QQLDDDDRLSRSDPGGRDGGTALLNKLLGPLADDHPRLRSLLFPQFTPER  
LEPLRAVVEKLTEQHLDELATRTPPVDLRPTLAMSILVLCWEWLGVP  
DKGRFSIWTQDAAGVQDPERSQRGLAELFGYCRQLVAAKRQDPGDDVISR  
LIATAGIGDTEVVALTALLLFGGYETTVARIGTGVLILLANPDQWAAVRA  
DPALVPATVDELLRRSMPNPNHNGGMPRFAVTGFEIDGAAIRAGDLVLLNI  
IAANHDETAFPDPDRDLITRPTAGSLAFGYGRHSCVGAPLARMVLRVALS  
RLITRFPDLRLAVGVDELKLRHETLVGGLVLPVWTWGPR

>CYP2054A3 (2516000412) *Salinispora pacifica* CNT603

MSISADSEQVQGRFPDPYGAHRDDPYTFLAGLGVFYAPLLDAWCVTRRED  
MVAVLRDDRSFSARDHNPRPAVALPDDVNQMFRWTRGAGAVAVGSLDPPA  
HAKIRDVLNIGFTPARVRAFEPTMRAVAADLADRIGDAPEFDFIADFAPV  
FALEVIGRRLGVPDDYLDRCRTWSEQRIELMMAQGDADHDRLREFARGLM  
EFGFARSLVRDRVADPRDDLISELLHDGKAGRTLTADEVAVQIPTLIFA  
GHMTCAEALGTIFYQQLRSPGGWARVVDRTIPVGDIVEEGLRFDSPLAGM  
YRTATRDVTVGGIRLTAGSRLLLLYGAAGRDSRAHACPAAFRPGDGSSGH  
LAFGHGHIHFCLGAGFARAELRVAVEVLAARMPDLGLAPGRPPRFRPVFPL  
RALTEL RVTRSGGGSGP

>CYP107FH3 (2516000417) *Salinispora pacifica* CNT603

VPIELDEAFVQDPYAVYEKLRAEGPAHRVRMPPGVPLIGGLPVWLITGYD  
AVRAALADSRLSTDHLRIDGLFAQKDPDRSHRGGFSSALASHMMHTDPPD  
HTRLRKLVSKAFTTRAIEALRPRIQQTDELTAELAGHDTVLDLLDAFAFP  
LPIRVICLLLGVPAEQENFRSWSRALVSGHSPEAAATAATEVAAYLGDL  
VERKRHATTDVLTALVAHDVDDRLTHTELVSTAYLLFIAGFETTLNAL  
GNGTLHMLHRDQWTALRADRALLDNAVEEFLRLESPLKHATFRCATESL  
RIGDAEIAAGDFVLLAIASANDPRRFPDPHTLDVRRPAAGHLAFGHGHI  
HCLGAPLARVEVRMAFDALLDAFPDMRLATDPAGLRWRNSTIIRGLDSL  
VHLNN

>CYP105AB28 (2516000722) *Salinispora pacifica* CNT603

MTETASTTTPGISSTTTSGPASGEVTDAEFPLERGCPTSTPTEYEQIREH  
SPLAKVRLTTGREAWWIAGHELGRAVLADRRFSSDRRRDNFPFVSTDPET  
RKQLRDQPTSMIGMDGAEHAQARRALMGFTVRRMAGLRPRIQQIVDQHI  
DEMLSSDQRTADLVEALSPLVPVSLVICELLGVADHDFFQARSGPLIRH  
TTPTEVRLRIQKELNTYLGALIDRKVADPTDDLRSRQIAKHHAAGTFDRT  
SLVSMAFLLLIAGHETTANMISLGVVGLLQHPDQLAMIKEDPEKTAPAVE  
ELLRYFTIADTVTARVATEDVQLGDTTINAGDGVVISGLAADHDPTVFTD  
PDRLDLARGARHHVAFGFGPHQCIGQTLARMELQIVFDTLFRRIPTLRLA  
APLDAIPFKSDAFVYGAERLPVAW

>CYP107E37 (2516000926) *Salinispora pacifica* CNT603

VTIDQEIREYPPFRESRGIGIDPTYELLRRTEPLARVQLPYGEVSWLVTRY  
EDVKTVLTDPRFSRAAAQGKDQPRTRAEMTYEGIIIGLDPPDHTRLRLLAG  
KALTARRVNIAIRADAQRIANEYVDEMIAGSGPDLVELFALPYPVTVICE  
LLGVPFEDRAQFRIWTEGLTSTSEQLMVYAEQLFDYMGKLV AQRRAEPTD  
DLLGALVKARDEGDRLTEQELLSIAGVGLLLTG VETVSTH IPNFVYALLT  
HPELMAQLRADRS LVPAAVEELLRMIPLNPAAMFPRYAVEDVTLSGITVR  
AGQPVLVSLPGANRDPEVFENPETFDFTREQNPHVAFGHGPHHCLGAQLA  
RMELQVALHTVLDRFPDLRLADGDEGVSWKSGLLVRGPSRLLVGW

>CYP125A65 (2519097328) *Salinispora pacifica* CNY331

MTEPRIPVGFDFTDPAVLERRVPREEFAELRRTAPVWWNVQPRGSAGFDD  
DGYWVVTRYADVMASRDSETYSTRENTAIARFQPGTTQADREMQRVIMI  
NVDPP EHTKLRAIVSRGFTPRAINALRGSLAERAERIVRDAAVRGTGDFV  
TDVACELPLQAI AELIGVPQHRRKVFDWSNQLIGYDDPAYGVDPMAAAA  
ELLAYAMEMANERQRNPSDDLVTKL VNAQIDGEHLTTDEF GFFVMLLAVA  
GNETTRNAITHGMLAFLEHPDQWELFKAERPRSAVEEII RWATPVNVFQR  
TALVDTTLGGQAITAGQRVALFYGSANFDES VFEEPERFDITRSPNPHLG  
FGGSGVHFCLGANLARLEIELIFNSIADHMPDIRKVADPQRLRSGWINGI  
REMPVRYR

>CYP208A22 (2519097416) *Salinispora pacifica* CNY331

GPKKLYFFNHPDHAKHVLADNHANYQKGIGLVHARRALGDGLLTSEGELW  
RKQRRVIQPAFQNRRLAQYAGAVGQEATRLVARLATRV DGPVVDVLD EMT  
RLTLGVLGR TLLDAELTG FHGVGESFAAVQDQAMFELET LNTVPTWIPLR  
RQRRFRRARQH LQEVDVLA AERGQAVEGRDDVLSRLILSTRAEADPQLG  
RERLRDELVTLLLAGHETTASTLGWSLHLLDQHPELRERVRHEARTVLGD  
RVPAYEDLHQLRYTAMVVEEAIRLYPPVWILTRKARAEDEIGGYRVPAGA  
DILICPYTLHRHPRFWAEPERFDPERFDPSRTTDRPRYAYIPFGAGPRFC  
VGNNLGMLEATLV LAVLLRDLRLEGLPGRAVVPEPMLS LRVRGGLPMTVR  
RVD

>CYP211B11 (2519097714) *Salinispora pacifica* CNY331

MDASEAVALLMSPPGRLDPYPTYERLRAHGPPVVSTAAGFFVVTGYTEADT  
VLRSPRFGVMDDEERDGAFFHWQDSPAMTSSISRSMIRANPPDH SRMRLA  
AGVFTPRRVAALREVVA AQADGLVDEMIRAGRGGAAVDFMG SFAYPLPVT  
VICALLGVPTADWARFRHWASDLTG VLEPELTPQELAIADAGASELRDYF  
TELIAQRRRAPADDLT TALVQAHDADGDRLSGEELLANLVLLLVAGFETT  
TNLLGNGLVVL LTHPDSATALRGQPELAPDYVEEFLRYDSPVQLTSRTVR  
ESVSLAGVELPAGSWLLVLLGAANRDPARFTD PARFDARRAQSPPLSFGA  
GAHYCLGAGLARLEAQVAFPLLLRRLPELV LAGEPTRRHRLTLRGYETLP  
VTVGAVPADPGTPAEVALGTP

>CYP107AW7 (2519097974) *Salinispora pacifica* CNY331

VETVTGTSTPPPVPYIADPYPTLARIRANGPVSILHSDEGIPMWVIARYR  
DVRAALADPRFGQDARRAQALADNRVAGVT LGGDIVHMLNSDPPDHTRLR  
RHVQGAFTARRVAAMRPLVERITTSLLDGLTGRTTVDLVQDFAFPLPMLV  
ICELLGFPAEERNAYRSWSTAILTHDDDPA AFATALREMTDYIAVQLRIR  
QTRPGDDILTELLAARDAGQLTDDEIIGMVFLLLIGGHETT VNLGATL  
ALMRNPDQHRWLLANQHALPEAIDEFLRYESPVAMATLRFTTTPVAVDDV  
VIPAGELVLVSLGGANRDHDFPDADRLILD RRDTGHLAFGHGLHRCLGA  
FLGKLEGEVALGALLRQH PKLALAAEVRQLRWRDTIMLRGLDSL PVS LHG

>CYP105H11 (2519100117) *Salinispora pacifica* CNY331



MIDTAGQLVVDVDFPLRKEGESFPPPRYA EYRQRDGLVLSYLPDGKPVWLVT  
RHA AVREILTSRKVSSNP DHKGFPNIGETMGVPRQDQIPGW FVGMDSPDH  
DRFRRALIPEFTVRRVREMRPAIQGV IDTVIDDLLANGPQADLINDFALP  
IPSLVISALLGVPTVDREFFESRTRTLVAVRASTDQERDTASRELLRYIN  
RLIEIKSKWPADDLPSRLLANGVLHPQELSGVLLLLLLIAGHETTANNIGL  
GIVSLENPQWIGDERVVEELLRLHSVADLVSLRVAVEDVEICGQVIRAG  
EGLVPLVAAANHDES VFACPHMFNPERSARQHVAFGYGVHQCLGQNLVRV  
EMELAYRTLFERIPGLRLTV DDEGLPFKYDGV LHGLHALPVRW

>CYP1005A6 (2519100239) *Salinispora pacifica* CNY331

VSAVLFRSWTKTAGTHWPAVTRVADQQGTEHLVVTEHALVRQVLT DQMTY  
RPDNALDAVTPIPVAALRVLAGHRFRLPPTLANNGGVSHPAIRALVADAL  
HPAKVAAQR PWLTELVAERVA AIRATLDSGGSADLHAELSADLPLLVLAR  
LVELPDAPVSAVKQFARA ALELFWAPLDADRQLALADEVGFHQV LREFA  
DTGGGLAAALRATGHPPDVLVGALFFLLVAGQETTSQFLTLLHRLAGEP  
TVRAALRDGSVSVPNVVEEGLRLEPPIV TWRRVA AVDSTLGGTAVPAGTS  
VLLWLARAGRDP AIVSAPDEF RPPGQQGSRRLAFGAGAHRC LGDQLARME  
AAVVVEQVSPLLDGVTVVRAPWYPDNL TFRMPDAFVIRRG PAGAAER

>CYP244A10 (2519100452) *Salinispora pacifica* CNY331

MQDTAQANLAEAPEVRMPIELRPTDCLPELLAAARVAPVVRTPYLDQHAW  
VVC DRELVKQAL THPKLGKDVALAPDWMRQPGQMVTAMPPPEYARMMVMS  
DGEHHARIRRIHAPVLS PQNTERWSERVAALVDGFLDNLDSADGTEVNLI  
TDYTHKIPLAFTA EMLGLPPGAQRRLHDITEVM LYSADYALRQQAVGELF  
EAVQEWVRDPAGLRDGVITGLLASTDGP DATVTKGEAIVWTL SLIINGYE  
TTGSLISAALYEALRRPARERPHTDEAVA AWIEETLRVQPPVPHTTWRF A  
LADLDLGGYLIPRGAPVQISLAAANLDPDE DADSFDAQRRGRGHL SFGLG  
AHYCIGAPLARVQTKIALRGFLRRFPQARLSPDTAPRWESEWMIRRM SVL  
PALLA

>CYP107AY9 (2519100473) *Salinispora pacifica* CNY331

MVATGSPVDLVTGYCTPLSVQVIADLLGVPEAGR TDLRAWTD TMLTSYPP  
DRDAVRQAVVELHGYV VNLIEAKQQRPGD DLLSALVATEQEGDRLTRDEL  
TSLAFLILFAGYENTANLI ASTVLRLLDHGSLRGVRVSEAIEETLRLEPP  
APAAIRRFPT EEMTIGGATIPAGDTVLLSIAAATRGADGNPARLAFGNP  
HYCLGAALARVEAE EAITVLARRLPGLALAVPGAPVRWRPTFRTHGPAEL  
LVAW

>CYP161N4 (2519100607) *Salinispora pacifica* CNY331

VNTVAQLPFTQTHVLDVAPALRLLQSRGKVHRVRTPEGVPAWLVTGHAEV  
QQLLDDDRLSRSDPGGRDGGTALLNKLLGPLADDPRLRSLLEPQFTPER  
LEPLRAVVEKLTEQHLDELAARTPPVDLRPTLAMS LPILVLCEWLGVPAE  
DKGRFSVWTQDAAGVQDPERSQRLAELFGYCRQLVAAKRQDPGDDVISR  
LIATAGIGDTEVVALTALLLFGGYETTVARIGTG VLLLLLTNPDQWAAVRA  
DPALVPATVDELLRRSMPNPNHNGGMPRFAVTGFEIDGAAIRAGDLVLLNI  
IAANHDETAFFDPDPRLDITRPTAGSLAFGYGRHSCVGAPLARMVLRVALS  
RLITRFDPDLRLAVGVDELKLRHETLVGG LVELPVTWGPR

>CYP2054A3 (2519100612) *Salinispora pacifica* CNY331

MSISADSEQVQGRPFDPYGAHRDDPYTFLAGLGVFYAPLLDAWCVTRED

MVAVLRDDRSFSARDHNPRPAVALPDDVNQMFRFTWRGAGAVAVGSLDPPA  
HAKIRDVLNIGFTPARVRAFEPTMRAVAADLADRIGDEPEFDFIADFAPV  
FALEVIGRRLGVPDDYLDRCRTWSEQRIELMMAQGDADHDRLREFARGLM  
EFGEFARSLVRDRVADPRDDLISELLHDGKAGRTLTADEVAVQIPTLI FA  
GHMTCAEALGTIFYQQLRSPGGWARVVDRTIPVGD LVEEGLRFDSPLAGM  
YRTATRDVTVGGI RLTAGSRL LLLYGAAGRDSRAHACPAAFRPGDGSSGH  
LAFGHGIIHFCLGAGFARAELRVAVEVLAARMPDLGLAPGRPPRFRPVFPL  
RALTEL RVTRSGGGSGP

>CYP107FH3 (2519100617) *Salinispora pacifica* CNY331

VPIELDEAFVQDPYAVYEKLRAEGPAHRVRMPGVP LIGGLPVWLITGYD  
AVRAALADSRLSTDLHRIDGLFAQKDPDRSHRGGFSSALASHMMHTDPPD  
HTRLRKLVS KAFTTRAIEALRPRIQQTDELTAELAGHDTV D LLD AFAFP  
LPIRVICLLLGV PVAEQENFRSWSRALVSGHSPEAAATAATEVAAYLGDL  
VERKRHATTDDVLTALVA AHDVDDRLTHTELVSTAYLLFIAGFETTLNAL  
GNGTLHMLHRDQWTALRADRALLDNAVEEFRLRLESPLKHATFRCATESL  
RIGDAEIAAGDFVLLAIASANRDPRRFPDPHTLDVRRPAAGHLAFGHGIIH  
HCLGAPLARVEVRMAFDALLDAFPDMRLATDPAGLRWRNSTIIRGLDSL P  
VHLNN

>CYP247A7 (2519100673) *Salinispora pacifica* CNY331

VRLTPGAARDIDLD SVNLF DLDLYTSGDPHPIWDMRAQSPLHHQVLADG  
REFWSVTRYDDVCRVLGDYREFTSERGTVVTHLGEDDIAAGKLLTSTDPP  
RHTQVRRRAIGAKLTRA VASWQDRIRDAIVRFLEPALDGD TFDLAEQALL  
LPAIVTGPLLGI PERDWQELVQLTAMVTAPSDPHFQHGSEAA TLAI SHHE  
LVTYVTEWVKQRRSAGGGDGSLLDHLMSVRVGGAPLTDEEIALDGY SILL  
GANVTTPTHTVSGTVLALIERPEQFEKAQADPSLLANLVEEGLRWTS AACN  
FMRYALNDTRIGGGTVPAGGAVVAWIGSANRDESYFPDPHQFDITRSGAN  
RQVAFGFGPHYCIGAPLARMTLGIFFEELVQRFSGSIELAGEPQH LRSYFI  
AGMTHLP IVAQKRKTP

>CYP105AB28 (2519101566) *Salinispora pacifica* CNY331

MTETASTTTPGISSTTTSGPASGEVTD AEF PVERGCPFFSTPSEYEQIREH  
SPLAKVRLTTGREAWWIAGHELGRAVLADRRFSSDRRRDNFPFVSTD PET  
RKQLQDQPTSMIGMDGAEHAQARRALMGFTVRRMAGLRPRIQQIVDQHI  
DELLSSDQRTADLVEALS LVPVPSLVICELLGV P YADHDFQARS GPLIRH  
TTPTEVRLRIQKELNTYL GALIDRKVADPTD D LLSRQIAKHHAAGTFDRT  
SLVSMAFLLLIAGHETTANMISLG VVGLLQHPDQLAMIKEDPEKTAPAVE  
ELLRYFTIADTVTARVATEDVQLGDTTINAGDGVVISGLAADHDPTVFTD  
PDRDLERGARHHVAFGFGPHQCIGQTLARMELQIVFDTLFRRIPTLR LA  
APLDDIPFKSDAFVYGAERLPVAW

>CYP107E37 (2519101716) *Salinispora pacifica* CNY331

VTIDQEIREYPFRESRGIGIDPTYELLRRTEPLARVQLPYGEVSWLVTRY  
EDVKTVLTDPRFSRAAAQ GKDQPRTRAEMTYEGII GLDPPDHTRLRRLAG  
KALTARRVNAIRADAQRIANEYVDEMIAKGSPGDLVELFALPYPVTVICE  
LLGV PFEDRAQFRIWTEGLTSTSEQLMVYAEQLFDYMGKLVAQRRAEPTD  
DLLGALVKARDEGDRLTEQELLSIAGVGLLLTG VETVSTH I PNFVYALLT  
HPELMAQLRADRS LVPAAVEELLRMIPLNPAAMFP RYAVEDVTLSGITVR  
AGQPVLVSLPGANRDPEVFENPETFDFTRDQNP HVAFGHGPHHCLGAQLA  
RMELQVALHTVLDRFPDLRLADGDEGVSWKSGLLVRGPSRLLVGW

>CYP211C1 (2518220639) *Salinispora arenicola* CNT859

VVDVEELLTRLYSAQGRQDPFPVYADLHAQGSIAALPPEPERRRVAAVAV  
GYDLVGAVLRDPEWSKAPPPGWTEQEILRTLQTSMMFINPPDHGRMRHVF  
AGTFTPRRLGALEPVVNRVADELLDRMADAGAGGLDFVAEFAYPLPARVM  
AEFIGIPETELDWYRERVDVIDAFLDVAGKTPQRLAAANAAGAELEAFYF  
ELLARRRRTPGEDLISGLVEAVDAGGVELTEDELVSNLIVLFNASFVTTV  
YMLSNGLPVLLAHPEVAAAALATDPVLTAGAVDEILRLQAPVHLLARAAPR  
DTVLGGVPI PQGQNVLLLLIAAANRDPAHFPDPDRFDPWRSGPPSLAFGLG  
LHYCLGAAVSRLEGRALPRLLSRFPRLRIMEQPVYSGSLFLRGIDKLSV  
SPGEGSTRE

>CYP125A41 (2518220788) *Salinispora arenicola* CNT859

MTEPRIPAGFDFTDPEVLAHRVPREEFAELRRTPVWWNAQPRGSAGFDD  
DGYWVVTRYADVMTVSRSDTYSTRENTAIARLRPDTTREDIEMQRVIML  
NVDPPPEHTKLRAIVSRGFTPRAINALRGSLAERAHIVRDAAVRGVGDV  
TDVACELPLQAI AELIGVPQHRRKVFDWSNQLIGYDDPAYGTDPLTASA  
ELLYAMEMAEERQSPSDDLVTKL VNAQIDGHELT TDEF GFFVMLLAVA  
GNETTRNAITHGMVAFLDNPEQWELFKAERP KSAVEE IIRWATPVNVFQR  
TALVDTVLGGQAI SAGQRVALFYGSANFDEAVFEDPERFDITRSPNPHLG  
FGGSGAHFCLGANLARLEIELIFNSIADHL PDIRKVAAPQRLRSGWINGI  
RQMPVRYR

>CYP107AX13 (2518221038) *Salinispora arenicola* CNT859

VTSPPHVAFGHLLRDPHGQYNALRGQAPVHHIRTPDGAPAWLVMRYDDV  
RAALTDPRLSVDKRFSDTDGEHGSSLPPELDAHLLNRDPPDHTRLRRLAA  
AAFTPRRVADQAPAVATIVDALLDGIAGQDQAE LIVGLASPLPLQVMHEL  
LGLPTQTSVDFRNWTNTLLSADANQPAQSR SAMATMRQFLMGQLARKRAQ  
PGDDLLTGLLAARDDDRFTDDELLAMVFLLMFAGYDNTAALIGNVTHAL  
LTDAGLHDAVRAGSVDLDSVVDEVLRWNPSFPLAVRRFAREPVTIAGHTI  
PAGDRVWLCLASANRDPAQFTEPDELGITPARRPHLAFGHGIHYCLGAPL  
ARLQTTVAVASLLDRYPGIRLAVPAHEL RWRESFRVRGLAALPVRL

>CYP1005A1 (2518221088) *Salinispora arenicola* CNT859

VSAVLFRSWTKTAGTRWPDVTRVADQSGTEHLVVTRHALVRQVLT DQATY  
RPDNAL EAVTPI PVAALRVLAGHRFRLPPTLANNGGVSHPAIRALVADAL  
HPTKVAAQR PWTGLVADRVASIRTTLD SGGPVDLYADLTADLPLLVLAR  
LVELPDAPVNAV KQFARA ALELFWAPLDADRQLALADEVGRFHQVLRFA  
DTGGGLAAALRATGHSPDVLVGALFFLLVAGQETTSQFLTLLHRLSGEP  
TIRAALRAGSISVADVVEEGLRLEPPIV TWRRVA AVDSTLGGTTVAAGTS  
VLLWLARAGRDP AVVAAPDEF RPGQRGSRRLAFGAGAHRC LGDQLARME  
AAVVVEQATPLLDGVTIVRPPWYPDNLTFRMPDAFVVR

>CYP154M15 (2518221680) *Salinispora arenicola* CNT859

MNDKCPFAALDVTGQDLHG EAARLREQGPAVLVELPGGVKAWSINRYEVI  
RELLMDRRVTKNARKHWP AFIKGEIPPDWEMISWVAMDNMTAYGKDHVR  
LRKLVGRAFTQRRADALRPQVVALSTKL LDDL GATPPGEVVDLRERFAYP  
LPAMLVASLIGMSEAALAAACSKVIDMMVHTNVSPEEAQAVLRGWRAAMAD  
LIESKRRTPGEDITTDLIAAREEDGSRLSEAE LADTIFAILGAGSETTIN  
FFDNAITALLSRPGQLQLRTGAVTWDDVIDEVL RVESPLAHLPLRYAVE  
DIELDGVTI PQGDFILVNYAAAGRDPALHGGTADEFDLARGDKTHLSFGY  
GPHYCLGAGIARMVATIGLSMLFERFPDLSLAVPATELKR LPTFIMNGHQ

TLPVRLTTHAR

>CYP125G6 (2518221705) *Salinispora arenicola* CNT859

VPTLLNEHVSYDGAIAIVDSGATSWIRLAERVNRVHLLRAHGLDTGD  
RLACVTGNRRETFEVLLAALHTGVTVPVNVHLLTVTEIGHILSDSGSRVV  
ITEELHVKAFAAAADGTAGPVAGLVLDREVEGFAAVEPLLAASPAEPE  
GQVCGATMLYTSGTTGRPKGVVNNLFVTGAPYARVGRLCDYARSVLGVP  
RERMLLDGPWYHSSQLFFALLSLQGSRLVIRPYFDPAATLKTIDDHRIT  
VTHLVPTQLVRLRLVDALTRQMFSGASLRRVWHGGGPCPPEVKRSMIDWW  
GPVLVEYYGATEGGVVTLIDSAEWLARP GSVGRAVPPSEVVVVDDGGQP  
AAGQTGQVFFRRRTGNQFHYHNAPEKTQAAYLAPDTFTTYGEVGHVDE  
DGYLFLTGRAQDMIVSGGVNVYPAEVEAALLRHPVVRDAAVIGVADDE  
FGERVVGIVVPETAVDPDDFATHLDAHCRVSLAGFKVPRTYRVVESL  
PRDETGKLRKDALRSKFGWLSGAAMTVPRPATGQPTAHRPDIAHPTTY  
VSGVPHDEFARRRRDEPVGWAEFVLTRHTAAGRTATRGSGFWAVTRY  
EDVVAASRRVTD FSSAAKGAFLLTDPRTPADLQQAQQLLVNMDDP  
HHARLRKLVTSVFTPRAVRGLLASIDAHAAALVAKVVAAGEFDVV  
TDLAAELPLLVLADLLGVPKQDRALLYGWSNHLVGFDPDFGGGDI  
DAYRTAMAEAFQYALNLGVERRARPTDLVSLLANAEVDGTRLT  
DREFCNFWLLLVVAGNETTRHLVAGTMQALTEHPGECARLVEGRV  
PMESAVEEELLRWVTPIMQFRRTATRDTEIGGQAVTAGEKVVLYY  
TSANRDATVFAEPDRLDLGRTPNRQLSFGIGPHYCLGAHLARAE  
LTALLRVMSPHLGSLQLTG PVSRLASNFVNGVKAMPAVIGSR

>CYP107FS2 (2518221744) *Salinispora arenicola* CNT859

MPVPQGEQNLTTTEVFADPKALFATLGSRQPLHRISLPDGMFAVLV  
TGNREARQALSDPRLVRSITAAAPELHKYHPLASDDYALSRHMLFAD  
PPDHGRMKLVSTAFTRRRVEQMRPRIQQITDDLIDVIAAKGEADLV  
ETLALPLPIAVISEMLGVPFADRSEFERHAEVLTGINASSGFDAI  
IAAGRWFDEYLAGLVQQRREPODDLISGMLAAQDKGDRLLTDVEL  
RSNALLLSAGFETTVNLIANGLLALLRHPEAMAALRSEPNLMTTAV  
DELRLRYDSPVSCVTYHFAQEPVEIGGFEIRSGEHVVIAAAAA  
NHDPTVFAAPSRLDLRREGSGQILSFSGIHFCLGAPLARLEGEI  
AFGTVLRRLAGLRLAVPTDSL VWKASFVLRRLERLPVTFTPD  
RDPNPIDSVHTV

>CYP105CN1 (2518221745) *Salinispora arenicola* CNT859

MAAPAPQATPSTTPHPPSYPLPRECPYRPSAGTAHLRDAGPVST  
VRLYDGRTAWLVTGAAEARALLADSRVSNRADFPNYPVMDERHLS  
MRATREMAREEEGGFAAALFGMDPPEHTRQORQLLPRFTVRQVA  
ARRPAIQIRIVDEHLDAMEANGSPADLVSAFATPVPTMVVCTH  
LGVPYQDRTRFEPVAGLFEPPDRADAAMAELTAYLHQLIETKQ  
SEPGDGVIDHLIANHLRPGAIDRAELVAIASAILVAGTVTTSSA  
IALGTLALLTAPGQYTALVDNPDLPVGA VNEILRYLSLVEQLAR  
VATEDIEIGGKLIRAGDGIIVSFAAGNLDPNVTTHPDRLDVALP  
PTNHLAFSHGIHHCIGQNLALLELDIAFRALVSRFPTLRLAVPA  
EQLPITYFAGDVPRLACL PVTW

>CYP105CP2 (2518221747) *Salinispora arenicola* CNT859

MTKSMPVQDLPAFPPIPRECPYRPSAQHVSLRSGGPMKVRLYNG  
RTAWLVTD SAHARAVLSDYRRVSIKPYHGNYPLLNEEFKVVDS  
GYADVLFGVDPPEHTRQORQMIMPSFTLRRTA VLRPDIQRI  
VDDKLDMMRHGAPGDLVTEFAQPVPSMVISFLLGVPWEDHEE  
FETPAHKLFVPELAEEATTEL GAYLERLIQKKEQPGGTPGGT  
GLLDDLIRDHLRAGALS RDELVHIAMAMLVAGTDTTNNVIS  
LGLTALLDNPDQWAALRDNPDDELIPGAVEEILRYTSLIEAFA  
RVAVSDIELNGAVIKEGEGILISSAGVNFDPALAPDPGRFDI  
RRPPRPSFSFSHGIHRCPGDNLARLELEIAFRSLVTRMPNLRT  
AKPIDQIPSNNDGTLQRL

YELPVVW

>CYP208A12 (2518222156) *Salinispora arenicola* CNT859

MTLDTITPRVPLGPPRTAALRMLLVMKRDRLGMLTSAAARYGDASRLPVG  
HRALWFFNHPRYAKHVLADNSANYHKGIGLVHARRALGDGLLTSEGLDWR  
KQRKVIQPAFQSRRIAQQAGMIAEEAFALVERLRARAGAGPVELTAEITG  
LTLGVLGRSLLDADLAGFDSIGDSFATVQDQAMFELETNAVPMWIPLPR  
QIRFRARRRKLQAVVDTLVDGRAGNLADRVDVLSRLILSARGEADPRVGR  
ERLRDELVTLLLAGHETTASTLGWTLSLIDRHGPGVWERLHAEAVEVLGDR  
LPEYDDLRLRLRYTVMVVEEAMRLFPVWLLPRRALAPDTIGEYRVPANAD  
VVISPYTLHRHPEFWPNPERFDPERFAPGQAADRPYAYLPFGAGPRFCV  
GNNLGMMEAVFVIALLCRHLRLTGVPGHRLVPEPMLSLRIRGGLPLVVRP  
VS

>CYP105J3 (2518222270) *Salinispora arenicola* CNT859

MTDSVAFPQGRVCPHQAPGYRPLAVQRPLAQVTLYDGRRVWAVTTRDLA  
RRLLVDPRISSDRTPAWPAIVPIVAAVNDAAQKVLKIATLVGTDGPE  
HKAQRKMLIPSFTEFRMNALRPMIQEIVDQQLDEMIKSGAPTDLIPAFAS  
AVPVTVLYRLMGIPDDDHGIFEKLSHQLLAGPNANEAYDQLMGYMSRLIA  
ERRRNPGEGLVDDLLAQHGANDDADHDELVSTLVVQVAGNHGTTGSMIAL  
GLFALLQHPEQLAELRADPSLMPTAVDELLRFLSVPDAVTRLAADDIEVE  
GTIIRKGDGVFFITSLINRDTDVHDAPNSLGWHHASAADHLTFGFGAHQC  
LGQSLARITMEIALGALIDRLPSLRLAVPAEEVPFLPAASLQVIAELPIT  
W

>CYP105BL2 (2518222506) *Salinispora arenicola* CNT859

MSSHSAAPDPETATPLHTLAPELAFFQFERSAPFDPPQAYTELSGRCPV  
APVSMADGKPSWLITSFEGVRTTLSDPRFSSDMSHPGFNRTGKPVDDLL  
KDTLGAMDGERHRYRRLMTGELTVRRAKAMRPVITQITDEALDQLAAAG  
PGADLVKHVAFVVPSPRVACHLVGIPLSYELFTGMAATLMDSTSSDDQFA  
ALQNMVSYFDTLVTDREHHRDRLDLGHMVRRYLATGELTRDMLIRLAWTT  
MAAGQETTAHMIIGLVAALLRHPDQLELLRREPHLLPGAVDELMRYLPLI  
QFGIPRVAMDDVEVDGQTVTAGEGVVALPPLANRDPVFERPDELVDVRN  
ARQHLTFGYGPHQCPAHALARLELEVYGRLLERFPTLRLADSDADLKVQ  
DKDIMYRVSELAVTW

>CYP166A4 (2518222538) *Salinispora arenicola* CNT859

MTDAISFELPWARTDKFDPPAVFDALREQRPLARMRYPDGHVGVIVSSYE  
LVREVLGDPRFSSHSCAVGHFPVTHQGQVIPTHPQIPGMFIHMDPPEHTRY  
RRLLTGEFTVRRTSRLTGHVVERVATEQIEVMREHGAPADLVATFARPLVL  
RVLSGLVGLPYGERDRYLHAVTLLHDAEADPAEAAAAAYEQAGAYFDEVIE  
RRRRQPEDDLISTLVGDGELTGEELRNIVTLLLFAGYETTESALAVGMFA  
LLYHEDQLARLRADPTKIDAAIEELLRYLTVNQYHTYRTASEDIELHGEV  
INKGDSVTVSLPAANRDPARFACPAELDIERETS GHVAFGFGI HQCLGQN  
LARVELRAGLSALLRAFPNLRLAVPADEVPLRLQGSVFAVKNLPVCW

>CYP1051A1 (2518222908) *Salinispora arenicola* CNT859

MATDAAITRARTVPAWKALPAAVRDTHRAFVDVGNWSDGDVVRVSLGVSR  
PYLVTPNAHVQEVLHERAAIYPRGDDTALWRSVRKLVGDGILAEGDAAWAA  
SRRVLAPMFRPARINAMVDTMADAIAGAVDDLHGAATAGTPIVGVRELSR  
IVCSAIMRVFFADRITVRDALRIMKAQETIVTAMAPRILAPLPWWIPMP  
GDRRFRAAVRSIDDILLPVLRLQAQRQPDGDDLLSRLVRARADDGQALSE  
KMRDRLVSMVAVTTETSTVVLTWLWPLLANHPDVANRLYDEIDRVVGGG

PVRGDHLAELTYTRMVLDELLRLYPAGWILPRRAATTDVLGGVRINKGAT  
VILSPYVTQRMATAWWGPTAEAFDPERFAAGREAADGRHRYAYYPFGVGMH  
RCLGEHLFNLEAILIVATLLSRFRFALTDTSMPGVKVAASSTRPARTVEMI  
LKPVAPVPAR

>CYP105G5 (2518222929) *Salinispora arenicola* CNT859

LTIIETTETPPADDSLRAPLPRQFMQRDDPSKLPALAAALAEQSPVGRSTL  
PDGDPFWMVSGYDEARAVLSDFRFSDDRFYHPRFKKLSGQLGERLRNDK  
ARAGSFINDPPEHTRYRKLLTGQFTVRRMRQLTVRIEQIVTEQVDVMLA  
EGNSADLVSAFAVPVPSLMICELLGVRYEDRTEFQRRAGLLQTDLPKQ  
AVENLEAQRAFMQRLVTDKRRTPADDMISGLVHHAGAEPLTDDELVGIA  
TLLLFAGLDTTASMLGLGMFMLLQRPQMAVLRDDPSRIGDAVEELLRYL  
TVVSTGLFRFAKEDVVLGDEHIPAGSTVVVSLMAANRDGRHWPEPETLDV  
TRVRSSHLAFGHGVHQCLGQQARIELTVGITELLRRLPNVRLAVPPADV  
PLRNDMITYGVHRLPILWDTF

>CYP107Q4 (2518222930) *Salinispora arenicola* CNT859

MTTETAETSAETIDLFSPEVVADPFGWYARLREETGPTTGTNLNIGTMMGGP  
EMWLVTTRYEDVRQVLTDPRFLTNPADSPLEDIRAGVFKRLDFPPDLIPW  
MANLLNVSDGEDHTRLRKLVSALTAKHRIGKLRPRVEKITADLLDKLAED  
GKDGSPVDLVEEYCYPLPVTVICELVGIDEPDRPHWRAGDSMATMNGER  
IPTTLVKCIELARELIANRAEPQDDLVTALVQAQAEQNRVSDDEIIGI  
LFSLVTAGHQTTTYLIGNSVILLLENPDQLARLKDNPSMWPQAVRELQRL  
GPIQFAQPRFPSEDIELGGVTIPRGAPVAPLLLAANTDPRRFPDPNKLI  
DRLAVGSEHGLGFGKGIHRCGLGQHLAYQEAEEVALQGLFTRFPDLSLAVPR  
EEIPWILRPGFTRTRTLPLKLV

>CYP154M21 (2518223439) *Salinispora arenicola* CNT859

MEKCPYVLDRAGSDIHKEASNLARGPVTLVELHGGYTASVTSYEVAKQ  
LLMDPRISKNTKAHWPEFRDGNVPQDWELYTWVAMDNMQTRDGKEHDRLR  
KLVAFAFTGRQAVKSRPIIEEIVNRLLDDLETAPRGQAVDIKARYFYPLS  
TILVCDLLGIAEEDRDVILHGNVNSKTTNTAESEANLHQWQTALGRLV  
ETKRRDPGDDLTTVVIKAGEDQTPITDDEVIGSLHLLIGGGTETTANVL  
CHTVVMDLTHPDQLAMVRSGAVSWESAWEEVVRKDGAVGSMFPFCATDDV  
EIGGVITIAKGLVLINIAAAGRDPERYGDAAAEFDITRADKANLSFGYGR  
HRCGLPALATMEAMVALPALFDRFPNLALAVPPNELKPGQTFIFNGYAEV  
PLLLRS

>CYP154M13 (2518223440) *Salinispora arenicola* CNT859

MSTGRPVVLDPTGRDIHGEADHLRALGPATLVELPGGVLAWSINSYEVGK  
ALLSAPNVSKSARRHWPFAFYNGEIPPDWEMISWVAMDNISTTFGGDHRRL  
RRLTAKAFGSRRAEQVRPMATHMVNTLLDRMADAADAGEVVDLKAAFAYP  
LPGMLVAELIGMSEEARVAAAKVIDMMTATNITPEQAQGVLLGWRDAITD  
LIALKRAQPGDDITSDLIAARDEDGSLLTEQELVDITIFAILGAGSETTIN  
FFDNAITQLLTHPEQLELVKSGQVSWDDVIEEVLRLSPLASLPMRFAVE  
DIQLDGVTIHRGDPIILINIAALGRDPALHGESAGVFDVTRQHKEHLSFGH  
GAHYCLGAGIARMVAKTGLSALFERFPRMTLAVSAKDLVPYPTFIMNGNR  
QLPVHLSGALTWREGEQSALGRA

>CYP105W2 (2518223454) *Salinispora arenicola* CNT859

MTGYQDRPTGDQPGAPVPSGSTDPGIGAFPLPRRCPFSPPAEYARLRAEH  
PVVRLPMLGGDTAWVVSRRHADVRQVLS DPRMSADRRRP GFKFAPTTEGQ  
RQASFANFRPPLNWLDPPEHAICRRQIVDEFSVRRVRQSRALVERVVDTH  
LDALTAAPGADLVSTFAYPVPSQVICEVLGVVPYGEHEFFERRSTLMFRR  
STPADERARCARERIRDFLDVVVTDKEHRPGDDVLSRLLYRQRRAGGVDHE  
AVVSMAFVLLVAGHVTTSNMLALSVLALLTHPARLARLRAEPPERFPAAVE  
ELLRYFTVVEAATARTATAEVTIGGVTTAAGEGVVALGQAANRDP RVFEH  
PDEFDPDRDARAHLAFGHGRHICPGQHLARLEMEVALSRLFRRLPGLRLT  
MEVSDLPLKEDSNIFGLYALPVAW

>CYP248A2 (2518223461) *Salinispora arenicola* CNT859

VLADTVTAFDPTAVDVRDPYPSYHWLLRHDPVHRGAHQVWYVS RFADVR  
AVLGDQRFARTGIRRFWTDLVGPGLLSQIVGDIILFQDEPDHGRLRGVVG  
PAFSPSALRRLEPTIEATVNDLLRPARALGAMDVVADLAYPLALRAVLEL  
LGLPAGDANAVGRWSRAVGRTLDRGATAEDMRRGHAAIAEFADYVERALA  
ERREDGADLLALMLAAHRSQ LMSRNEIVSTVVTFIFTGHETVASQLGNGL  
LSLLDHPEQLELVRRQPHLVPQAVEECLRFDP AVQSNTRQLAADVELHGR  
RLRRDDVVVVLAGAANRDPGRYDRPDELDIRRDPVPSMSFGAGMRYCLGS  
YLARLQLRTALGAMVALPDLRLVCNPNELAYQPRTMFRGLTRL PVAFTPA  
G

>CYP154M20 (2518223483) *Salinispora arenicola* CNT859

MERCPYVLDRAGRDLHGEAKALRARGPVTLEVELHGGYTAWSVTSYEIAKQ  
LLVDPRI SKNTKETWPEFREGKVPQDWELYTWVAMDNMQTRDGEEHDRLR  
KLVAQAFTRQVAKVRPMIEDIVDRLLDDLEKVPAGEVV DIKGRYFYPLS  
TILVCDLLGIPEADRAEALHGT VVNARTTNSAESEANLHQWQSALSKLV  
ETKRREPGNDITTLIKAREDEQAPLTDDEVIGSLHLLIGGGTETT SNVL  
CNTLIDL LTHPDQMAMIRSGAVGWEEAWEVEVRKDGAVGSMPFR CANADI  
EIGGVTTIAKGDVLVINYAAAGRDPERYGDTTAEFDITRADKTNLSFGYGR  
HRCLGPALATMEAMISLPALFERFPDLVLAVPRDELKPQGTFFVNGYAEV  
PMLLRS

>CYP107FJ2 (2518223490) *Salinispora arenicola* CNT859

MSETLSTSVLLADAAEQRAWRAKLRGAGPVHRITTSGETGWLI VGHHEEA  
RNALVDLRLQGR TATVGHGRMPEDLERALNSHMLNVGPPDHTRLRRLVS  
AAFTRRRIEQMRPRIQELTDELLDGLAGADEADLVAGLALPLPMRV LVDL  
FGIPAEDCADFNVTWKVLTSAGAVDLDRLLTTAAGEMVAYLRGLLDRKRQV  
PESDLSALVAVRDGADRLSDEL TSMVYLLLTAGYETTVNLIGNGLLNL  
LANPEQLVAFKADPDLLPQVVEEAMRFDSPVQIAVRHSTEPVEIAGQAIP  
SGALILVSL LWANRDPDRFTEPEAFRVDRQDN PQLGFGYGFHHCIGAPLA  
RMEGTIAIGTVIRRF PALRLAHPAGSLTWRASMVMHGLTALPVHLR

>CYP245A7 (2518223560) *Salinispora arenicola* CNT859

MPSATLPRFALTGWSRENIVNPYPVYQRYREVASVHRGEPGGDAPDTFYV  
FSYDEVVQVLSSNCFGRGRSLDAAKASVPVPAEQKALRAIVENWLVFMDP  
PRHTELRLSLNRSFSPRIVTEL RPRIARIAQELLSRLGQQVDVDLVESFA  
APLPILVISELLGIPEERRAWLRANALALQEASSSRAGRDVDGYARAEVA  
AQEFTEYFREQVRLRRGRAGGDLITILANAQQRGAPVSLDAIVGTCVHLL  
TAGHETTTNSLAKAVIALREHPTVLDEL RGAEGLTDDAVEEFFLYDPVQ  
AVTRWAHQD TTGGCDIPGRSRVVAL LGSANRDPARFPSPDVL DVRRPAD  
RHLSFGLGIHYCLGATLARAEEIIGLQALLDGVP TLYGTQHV DYADDLV  
FHGPSRLVLVNLGERCK

>CYP244A4 (2518223564) *Salinispora arenicola* CNT859

MSTTTNTELTEAPETNMPVDPGLFDCMPDLIAARVAPVVRIPYLGRIHAW  
VVCDELVKQALHTPKMGKDIALVPEWMRQPGMLVTAQPDPEYARAMIMS  
DGENHARIRRIHAPVLSRPNTERWGERVADKVEGFDELDSQAGSGGSTEV  
NVVTNYTHKIPLAFISEMLGLPPEAEHRLRGITDIMLYSSDYAARREAIG  
GLFGAVEDWVRNPADLRDGVITGLLAASDGPDAAVTEGEVIVWTLGMIIT  
GYETTGSLISTSLYEAIRPPHERPKTDEDITAWIEETLRVHPPFPHPPTW  
RFPLEDIELGGYLIPKGAPVQVSIAAANRKPGEGADSFDAERRGHGHLSE  
GLGMHYCIGAPLVRLEAQIAVRGFLRRFPQARLSAETAVQWESEWMIRRM  
SVLPAVLS

>CYP211B2 (2518224082) *Salinispora arenicola* CNT859

MDVSEAI AVLISPSGRLDPYPTYEQ LRAHG PVSQT TAGLFVVTGYAEADM  
VLRDPRFVVLDDDLRDDVFPHWQDSPAIKSIARSMRLTNPPDHSRIRRLA  
AGAFTPRRVAAMREVVTQADELVDemiQAGRDGARVDFMDMFAYPLPVA  
VICALLGVPAADRSRFRRWAGDLTGILEPEITPEELAGADAGADELRDYF  
TGLIEQRRRAPADDLTALVQAHDADGDRLSGEELLANLVVLLVAGFETT  
TNLLGNGLVVLLTRPEAAAAALRDEPD LAPGYVDELLRYDSPVQLTTRTVR  
ESVSFAGTELPAWSLLVLLGAANRDPRRFPDPARFDPGRAQSQPLSFGA  
GPHYCLGAGLARLEAQVAFPLLLRRLPELALAGRPSRRTRLTLRGYETLP  
ITVGAVTADRGTAGVAPGTP

>CYP105CH1 (2518224261) *Salinispora arenicola* CNT859

VSSLPLPTYPKLRDPADPLLPAPAEYLAIQSEKPIAKVLLPSGRPTWLITG  
HALARQVLTEPCVSVDRRHNPFPYPVPNPDAVVAQVARWTYILLGDDPPL  
HTERRRLLI SEFTVRQAQAMRPRIQQLVDFHLEQLIAAGPGADF SKHFAM  
KVPSAVICEMLGVPFADHDYFQERTALQLRRDVPVAAQKQAIDELLAYFE  
QLIQEKSSHPGDDVLSRLIVSNRETEAFDHEALVALGLLLLLVGGHETTAN  
TLTLATATMLERPEIAEQLRTPSLMPSAVEEFLRYFSVAVAVSRIATAD  
LQVGGQLVRAGESMLLVNLT IARDGT VFP EPHRLDIRRNARNHLAFSHGI  
HQCMGQNLARVEMQIALD TVLRRLPGLHLVAPFEELPFKYRHLVWGIEEL  
RVAW

>CYP107AY2 (2518224840) *Salinispora arenicola* CNT859

MTAEPTPIPRSGARLGQEYDQLRKTDGVHQVLLPDASLAWLVNPEVAAR  
ALADPRLALNRRNSRGGWSGFALPPALDANLLNLDAPDHTRLRRLVGPAPF  
SPQ RVAALRPGIRRAAEHLDDTLVATSGPTDLVTGYCNPLSVQVIADLMG  
VPEAGR TNLRAWTDMLTSYPPDRDAIRRAVTELHG YVVDLIDIKQQQPG  
DDL SALVTIEQDGDRLSRDELTS LAFLILFAGYENTANLIASAVLWLLD  
HGGLNVVPISEAIEATLRHEPPAPVAIRRFPTEDIIIGV TIPAGDTVLL  
SVAAATRGADGNAARLAFGNGPHYCLGAALARVEAEEALTVLARRLPGLT  
LAVPPSQVRWRPTFRTHGPAELLVGW

>CYP107EU1 (2518225013) *Salinispora arenicola* CNT859

VTIGQTLPLDVYSPEFTRDPYAIFARLREQAPVCRVTTHRGMSAWMVTRH  
ADVRALLADNRLAKDGNRIGELMPRHSTLTGAATGFPPGLTTNMVNSDPP  
DHTRLRHLVGREFTGHRVEGLRPRIEEIVDDLLDGVAACGDEADLAETLA  
RRLPIAVIGELLGVPEADRAEFFRWADTLYGGTASPEALGQAYNAIVDYL  
GRLCDAKRDPADDLLTALVQVSADEDRLSREELVSMALLLVAGHETTS  
KQISNGVLALLLNPEQLKLLKAQPARTAGAVEELLRFEGPSLSASLRFTT  
EPVEVAGVVIPEGEFVLLSLASGNRDPEKFDPDRDLITRSTQGNLAMGH  
GIHHCVGAALARLELEIVLSRLVARFPQMQLAVEADDLEWL VNSFFRAPL  
HLPVSLRR



>CYP1198B1 (2518225251) *Salinispora arenicola* CNT859

MSGELTDQRTAPGAGGNPLRSLMDHGIRANPYPLFGELREAGPTAVEDGS  
VVLFGHEYEHCSQILRHRDMGSDTSEAPSIKGFVVDDAERAGSSIFFMDQP  
GHGRQKRLVSKSFTPRIVKSFGPQIITHIVDGLFEDFRDKGELDVVTDLAY  
PVSIGIICDLFGIPDDERDMLKEWSDDLALSTELPTLGAAIGVLNVFTRD  
EINRFGSVAMAAHAYFADLIHRRRKNP GDDLVSLLATESNGERLTRFEV  
TSVLATLFVAAHESTTNLISGGILALLRNQDQMAVLRENPGITNVVDES  
LRYDPPVHLAARMARARTTIGGYDLDPGTIVVVLMAAGNRDPRAYENPDV  
FDVNRKIRNVSLAFGAGAHFCIGSGLAKLEAEIAISAFQRLKHPEVDES  
SLEYRRHIVVRGLEHMKVAFQP

>CYP211B2 (2518143281) *Salinispora arenicola* CNB458

MDVSEAVAVLTSPSGRLDPYPTYEQ LRAHG PVSRTTAGL FVVTGYAEADM  
VLRDPRFVVLDDDLRDDVFPHWQDSPAIKSIARSMLRTNPPDHSRIRRLA  
AGAFTPRRVAAMREVVTQADELVD EMI RAGRDGARVDFMDMFAYPLPVA  
VICALLGVPAADRSRFRRWAGDLTGILEPEITPEELAGADAGADELRDYF  
TGLIEQRRRAPADDLTALVQAHDADGDRLSGEELLANLVVLLVAGFETT  
TNLLGNGLVVL LTRPEAAAAALRDQPD LAPGYVDELLRYDSPVQLTTRTVR  
ESVSFAGTEL PAGSWLLVLLGAANRDP RRFDPARFDPWRAQSQPLSFGA  
GPHYCLGAGLARLEAQVAFPLLLRRLPELALAGRPSRRTRLTLRGYETLP  
VTVGAVTADRGT PAGVAPGTP

>CYP208A12 (2518143339) *Salinispora arenicola* CNB458

MTLDTITPRVPLGPRTAALRMLLV MKRDRLGMLTSAAAARYGDASRLPVG  
HKALWFFNHPRYAKHVLADNSANYHKGIGLVHARRALGDGLLTSEGDLWR  
KQRKVIQPAFQSRRIAQQAGMIAEEAFALVERLRARAGTG PVELTAE L TG  
LTLGVLGRSLLDADLAGFDSIGDSFATVQDQAMFELET LNAVPMWIPLPR  
QIRFRARRRKLQAVVDTLVDGRAGSLADRVDVLSRLILSARGEADPRVGR  
ERLRDELVTLLLAGHETTASTLGWTL SLIDRH PGVWERLHAEAVEVLGDR  
LPEYDDLRLRLRYTVMVVEEAMRLFPPVWLLPRRALAPDTIGEYRV PANAD  
VVISPYTLHRHPEFWPNPERFDPERFAPGQAADRPRYAYLPFGAGPRFCV  
GNNLGMMEAVFVIALLCRHLRMTGVPGYRLVPEPMLSLRIRGGLPLVVRP  
VS

>CYP211C1 (2518143656) *Salinispora arenicola* CNB458

VVDVEGLLARLYSAQGRQDPFPVYADLHAQGPIAALPPEPERRRVA AVAV  
GYDLVGAVLRDPEWSKAPPPGWTEQEILRTLQTSMMFINPPDHGRMRHVF  
AGTFTPRRLGALEPVVNRVADEL LDRMADAGAGGLDFVAEFAYPLPARVM  
AEFIGIPETELDWYRERVDVIDAFLDVAGKTPQRLAAANAAGAE LRA FYG  
ELLAHRRRTPGEDLISGLVEAVDAGGVALTEDELISNLIVLFNASFVTTV  
YMLSNGLPVLLAHPEVAAALATDPVLTAGAVDEILRLQAPVHLLARAAPR  
DTV LGGVPI PQGQNVLLLI AAANRDPAHFDPDRFDPRRSGPPSLAFGLG  
LHYCLGAAVSRLEGR LALPRLLSRFPRLRIMEQPVYSGSLFLRGIDKLSV  
SPGEGSTRE

>CYP125A41 (2518143802) *Salinispora arenicola* CNB458

MTEPRIPAGFDFTDPEVLAHRVPREEFAELRR TAPVWWNAQPRGSAGFDD  
DGYWVVTRYADVMTVSRSDTYSTRENTAIARLRPD TTREDIEMQRVIML  
NVDPP EHTKLRAIVSRGFTPRAINALRGSLAERA EHIVRDAAVRGV GDFV  
TDVACELPLQAI AELIGVPQHHRKVFWDWSNQLIGYDDPAYGTDPLTASA

ELLAYAMEMAEERQSPSDDLVTCLVNAQIDGHLTTDEFGFFVMLLAVA  
GNETTRNAITHGMVAFLDNPEQWERFKAERP KSAVEEII RWATPVNVFQR  
TALVDTV LGGQAI SAGQRVALFYGSANFDEAVFEDPERFDITRSPNPHLG  
FGGSGAHFCLGANLARLEIEELIFNSIADHLDPDIRKVAAPQRLRSGWINGI  
RQMLVRYR

>CYP245A7 (2518144140) *Salinispora arenicola* CNB458

MPSATLPRFALTGWNRENIVNPYPVYQRYREVAPVHRGEPGGDAPDTFYV  
FSYDEVVQVLSSSCFGRGRSLDAAQASVPVPAEQKALRAIVENWLVFMDP  
PRHTELRSLLNRSFSPRIVTEL RPRIARIAQELLSRLGQQVDVDLVESFA  
APLPILVISELLGIPEERRAWLRANAMALQEASSSRAGRVDVDGYARAEVA  
AQEFTEYFREQVRLRRGSAGGDLITILANAQERGAPVSLDAIVGTCVHLL  
TAGHETTTNSLAKAVLALREHPAVLDELRGADGLTTDAVEEFLRYDPPVQ  
AVTRWAHQD T T LGGCDVPRGSRV VALLGSANRDPARFPLPDVLDVRRPAD  
RHLSFGLGIHYCLGATLARAELEIGLQALLDGVP T LGYGTQHVDYADDLV  
FHGPSRLVLVNLGER

>CYP244A4 (2518144144) *Salinispora arenicola* CNB458

MSTTTNTELTEAPETNMPVDPGLFDCMPDLIAAARVAPVVRIPYLGRHAW  
VVC DRELVKQAL THPKMGKDITL VPEWMRQPGLMVTAQPDPEYARAMIMS  
DGENHARIRRIHAPVLS PRNTERWGERVADKVEGFLDELSQAGSGGSAEV  
NVVTNYTHKIPLAFI SEMLG LPP EAEHRLRGITDIMLYSSDYAARREAIG  
GLFGAVEDWVRNPADLRDGVITGLLAASDGPDAAVTEGEVIVWTLGMIIT  
GYETTGS LISTS LYEAI RRPPHERPKTDEDITAWIEETLRVHPPFPHP T W  
RFPLEDIELGGYLIPKGS PVQVSIAAANRKPGE GADSFEAERRGHGHL SF  
GLGMHYCIGAPLVRLEAQIAVRGFLRRFPQARLSAESAVQWESEWMIRRM  
SVLPAVLS

>CYP1051A4 (2518144489) *Salinispora arenicola* CNB458

MATDAAITRVRTVPAWKALPAAVRDTHRALVDVGNWSDGDVVRVSLGVSR  
PYVVTNPAHVQEVLHERAAIYPRGDDTALWRSVRKLVGDGILAEGDAAWAA  
SRRVLAPMFRFPVRINAMVD TMDAIA GAVDDLHGA AVAGTPIDVGRELSR  
IVCSAIMRVFFADRITVQDALRIMKAQETIVTAMAPRILAPLVPWWIPMP  
GDRRFRTAVRSIDNILLPVLRQAQRQPDDGDDL SRLVVRARADDGQVLSE  
KRMRDDLVSMAVTTETSTVVL TWLWPLL ANHPDVADRLYDEIDRVVGGG  
PVRGDHLAELTYTRMVLD ELLRLYPAGWILPRRAAATDVLGGVRINKGAT  
VILSPYVTQRM TAWWGPTAEAFDPERFAAGQEAADGRHRYA YYPFGVGMH  
RCLGEHLFNLEAILIVATLLSRFRFALTDTSMPGVKVAASTR PARTVEMI  
LKPVAPIPAR

>CYP107FS2 (2518144732) *Salinispora arenicola* CNB458

MPVPQGEQNLTTTEVFADPKALFATLGSRQPLHRISLPDGM PAVLVTGNRE  
ARQALSDPRLVRSITAAAPELHKYHPLASDDYALSRHMLFADPPDHGRMR  
KLVSTAFTRRRVEQMRPRIQQITDDLIDVVAAGKEADLVEALALPLPIAV  
ISEMLGVFPFADRSEFERHA EVL TGINASSGFDAI I AAGRWFDEYLAGLVQ  
QRRREPQDDLISGMLAAQDKGDRLTDVELRSNALLLSAGFETT VNLVAN  
GLLALLRHPEAMAALRSEPNLMTTAVDELLRYDSPVSCVTYHFAQE PVEI  
GGFEIRSGEHVVIAAAAANHDPTVFADPSRLDLRRQGSQILSFSGIHF  
CLGAPLARLEGEIAFGTVLRLLAGLRLAVPTDSLWVKASFVLHRLRLPV  
TFTPDRDPNPIDSVHTV

>CYP105CN1 (2518144733) *Salinispora arenicola* CNB458

MAAPAPQATQSTTPHPPSYPLPRECPYRPSAGTARLRDAGPVSTVRLYDG  
RTAWLVTGAAEARALLADSRVSNRADFPNYPVMDERHLSMRATREMAREE  
EGGFAAALFGMDPPEHTRQRQQLLPRFTVRQVAARRPAIQRIVDEHLDAM  
EANGSPADLVSAFATPVPTMVVCTHLGVFPYQDRTRFEPVAVAGLFEPDRAD  
AAMAELTAYLHQLIETKQSEPGDGVIDHLIANHLRPGAIDRAELVAIASA  
ILVAGTVTTSSAIALGTLALLTAPGQYAALVDNPDLPVPGAVNEILRYLSL  
VEQLARVATEDIEIGGKLIRAGDGIIVSFAAGNLDPNVTTHPDRLDVALP  
PTNHLAFSHGIHHCIGQNLALLELDIAFRALVNRFPTRLRLAVPAEQLPY  
FAGDVPRLACLPTW

>CYP105CP2 (2518144735) *Salinispora arenicola* CNB458

MTKSMPVQDLPAFFIPRECPYRPSAQHVSLRSGGPMKVRLYNGRTAWLV  
TDSAHARAVLSDYRRVSIKPYHGNYPLLNEEFKVVDSGYADVLFGVDP  
EHTRQRQMIMPSFTLRRTAVLRPDIQRIVDDKLDMMRHGAPGDLVTEFA  
QPVPSMVMSFLLGVFWEDHEEFETPAHKLFVPELAEETTELGAYLERLI  
QKKEQPGGTPGGTGLLDDLIRDHLRAGALSDELVHIAMAMLVAGTDTTT  
NVISLGLTALLDNDPQWEALRDNPDDELIPGAVEEILRYTSLIEAFARVAV  
SDIELNGAVIKEGEGILISSAGVNFDPALAPDPGRFDIRRPPRPSFSFSH  
GIHRCPGDNLARLELEIAFRSLVTRMPNLRATAKPIDQIPSNNDGTLQRL  
YELPVVW

>CYP105CT2 (2518144844) *Salinispora arenicola* CNB458

MNSPNHMPADSSSTAPARGCPMALSRGRVGLDVTDEISELRDGGRLGRIT  
TAFGQEATLITRYDEVRAQMADSAVFNVAGVSPPPVLVDGGFDTESVRRR  
RTVGNLIMLDPPEHTRLRRMVAAWFTTRRVERLRPRVVEIINAALDEMER  
SGPPVDLVAMFAKTVPITVICELIGVPEELRERYRRRAERAASASAVSTP  
LDELRLREAGWVSRELIEYHRENPSDDIIGMLLREHGADSHDDGITDDE  
LVGLANALLIAGHETTTQMLSMGTLALLRHPDQLALLRDDPSIVAGAVEE  
LLRYVGVLHGGFVRVATRDTRLGGHRIHAGELVVPALTAANRDPRLTDG  
DRLDITRPPTSHVAFGHGVHFCIGAPLARMELREAFPALLRRFPGLRLAV  
PDSELEFTQGTTVYSLRGLPVTW

>CYP154M5 (2518144860) *Salinispora arenicola* CNB458

VEQSCPYKLDVTGRDIAEGEAI RARGPVAQVELPGGVQGWSVTGYQAAR  
QVLADPRFAKDPQKWPAYTSGAIPPTWPLIGWLLMDNMTTNDGADHQRRL  
KLVSHGFTPRQVERTRPLIVKIVNDLLDGLSTAGPDEVVDLKGRAFATPLP  
ARVICDMFGVPEALRASVLRGAQVNVTSISGEEAEANVEQWHRELELV  
EAKREKPDEDMASLLIAAKEEDGSTLSQEEVVGTLHMLGAGSETLMNAL  
SYAVLGMLSNPGQYEMVRNGTSSWDDVIEETLRAQAPVAQLPLRYATEDV  
AVGGAVIKAGDPVLMGFTAIGRDPVHGETAGDYDITRADKTHLSFGHGV  
HFCLGAPLARLELKIALPALFERFPNMTLAVRPDQLEPQGTIFMNGHREL  
PVRLGQPATVLA

>CYP105BL2 (2518146009) *Salinispora arenicola* CNB458

MSSHAAAAPDPETATPLHTLAPELTFPQFERSTPFDPQAYTELSGRCPV  
APVMSMDGKPSWLITSFEGVRTTSLDPRFSSDMSHPGFNRTGKPVDDL  
KDTLGAMDGERHRYRRLTGELTVRRAKAMRPVITQITDEALDQLAAGV  
PGADLVKHVALVVP SRVAYHLVGIPSSDYELFTGMATTLMESTSSADQFA  
ALQNMVSYFDTLVTDREHHRDRLGMRVRRYLATGELTRDMLITLVWTT  
LAAGQETTAHMIGLGVAALLRHPDQLELLRREPHLLPGAVDELMRYLPMI

QFGIPRVAMDDVKVDGQTVTAGEGVVALPPLANRDPVFERPDELDVRRN  
ARQHLTFGYGPHQCPAHALARLELEVYGRLLERFPTLRLADSDADLKVR  
DEDIMYRVSELAVTW

>CYP105AB35 (2518146224) *Salinispora arenicola* CNB458

MTETASSRLTDETFVQRQCPFAEPVEYEQIREQSSIAMVRLTGGGEAWW  
ISGHEQGRAVLADRRFSSDRKANFPFISTDPATRKRLYAQPLSMISMDG  
AEHAQARRALIGEFTVRRLAALRPRIQQIVDQCIDEMLTDDQHCVDLVKA  
LSLPVPSSLVICELLGVPPYDDHDFQEHATLVRRNAAPEVRQHSIDELNA  
YLGALIDRKLANPDDDLGRQIARQHQDGTFRSSIVSLAFLLLVAGHET  
TANMISLGVVGLLQHPDQLTMIKNDPDKMPLAIEELLRFFTIVDSVTSRV  
ATEDVRFGDTTINAGDGVVVSGLSADWDPTVFADPDRLDLERGARHHIAF  
GFGPHQCIGQNLARLELQIVFDTLFRRIPTLRLAAPLDKIPFKTDAAIYG  
ARELPVAW

>CYP105CH2 (2518146363) *Salinispora arenicola* CNB458

VSSLPLPTYPKLRDPADPLLPPADYLAIQSEKPIAKVLLPSGRPTWLITG  
HALARQVLAEPVSVDRKHNFPPYPVPNPDAVVAQVARWTYILLGDDPPL  
HTERRLLISEFSVRQAQAMRPRIQQLVDFHLDQLIAAGPGADFSKHFAM  
KVPSAVICEMLGVPFADHDYFQERTALQLRRDVAVADQKQAIDELLAYFE  
QLIQRKSSHPGDDLLSRLIVSNRETEAFDHEALVALGLLLLLVGGHETTAN  
TLTLATATMLERPEVAEQLRTDPSLMPSAVEEFLRYFSVAVAVSRIATAD  
LQVGDLVRAGESMLLVLNTIARDGTVFPEPHRLDIHRNARNHLAFSHGI  
HQCMGQNLARVEMQIALDTVLRRPLGLHLVTPFEELPFKYRHLVWGIEEL  
KVAW

>CYP1005A1 (2518146418) *Salinispora arenicola* CNB458

VSAVLFRSWTKTAGTRWPDVTRVADQSGTEHLVVTRHALVRQVLTDAQTY  
RPDNALAEAVTPVPVAALRVLAGHRFRLLPPTLANNGGVSHPAIRALVADAL  
HPTKVAAQRPWLTTELVDRAVATIRTTLDSSGGPVDLYADLTADLPLLVLAR  
LVELPDAPVNAVKKQFARAALFLWAPLDADRQLALADEVGRFHQVLREFA  
DTGGGLAAALRATGHPPDVLVGALFFLLVAGQETTSQFLTLLHRLTDEP  
TIRAALRAGSTSVADVVEEGLRLEPPIVTVRRVAAVDSTLGGTTVAAGTS  
VLLWLARAGRDPVVAAPDEFPRPGQRGSRRHLAFGAGAHRCCLGDQLARME  
AAVVVEQATPLLDGVTVVRPPWYPDNLTFRMPDAFVVRR

>CYP105G7 (2518146502) *Salinispora arenicola* CNB458

LTIETTETPPADDTLRAPLPRQFMQRDDPSKLPPALAALAEQAPVGRSTL  
PDGDPFWMVSGYDEARAVLSDPRFSSDRFRYHPRFKKLSGQLGERLRNDK  
ARAGSFINDPPEHTRYRKLLTGQFTVRRMRQLTVRIEQIVTEQLDVMLA  
KGNSADLVSAFAVPVPSLMICELLGVRYEDRTEFQRRAGLLQTDLPKQ  
AVENLEAQRAFMRQLVTDKRRNPADDMISGLVHHAGADPPLTDDDELVGIA  
TLLLFLAGLDTTASMLGLGMFMLLQRPEQMAVLRGDPFRIGDAVEELLRYL  
TVVSAGLFRFAKEDVVLGDEHIPAGSTVVVSLMAANRDGRHWPEPETLDV  
TRVRSSHLAFGHGVHQCLGQQARIELTVGITELLRRLPNVRLAVPPADV  
PLRNDMITYGVHRLPIRWDTF

>CYP107Q4 (2518146503) *Salinispora arenicola* CNB458

MTTTAETSAETIDLFSPEVVADPFGWYARLREETGPTTGTNLNIGTMMGGP  
EMWLVTRYEDVRQVLTDPFRFLTNPADSPLEDIRAGVFKRLDFPPDLIPW  
MANLLNVSDGEDHTRLRKLVSALTARHIGKLRPRVEKITADLLDKLAED  
GKDGSPVDLVEEYCYPLPVTVICELVGIDEPDRAHWRAWGDSMATMNGER  
IPTTLVKCIELARELIEKRRAPQDDLVLTALVQAQAEQDNRVSDDEIIGI  
LFSLVTAGHQTTTYLIGNSVILLLENPDQLARLKENPSMWPQAVRELQRL  
GPIQFAQPRFPSEDIELGGVTIPRGAPVAPLLLAANTDPRRFPDPNKLI  
DRLAVGSESHLGFGKGIHRCLGQHLAYQEAEEVALQGLFTRFPDLSLAVPR  
EEIPWILRPGFTRTRTLPLKLV

>CYP107EU2 (2518146522) *Salinispora arenicola* CNB458

VTVGQTLPLDLYVSPEFTRDPYAVFARLREQAPVCRVTTTHRGMSAWMVTRY  
ADVRALLADSRLAKDGNRIGELMPRHSLKTGAATGFPPGLTTNMVNSDPP  
DHTRLRHLVGREFTGHRVESLRPRIEEIVDDLLDGVAACGDEADLAEILS  
RRLPIAVIGELLGVPEADRAEFFRWADTLYGGTASPEALGQAYNAIVDYL  
GRLCDAKRDPADDLLTALVQVSADEDRLSREELVSMALLLLVAGHETTS  
KQISNGVLALLLDPEQLKLLKAQPALAAGAVEELLRFEGPSLSASLRFTT  
EPVEVAGVVIPEGEFVLLSLASGNRDPQKFPDPDRLDITRSTQGNLAMGH  
GIHHCVGGAALARLELEIVLSRLVARFPQLQLAVAADDLEWLVNSFFRAPL  
HLPVSLGR

>CYP107AY14 (2518147099) *Salinispora arenicola* CNB458

MTAELTPIPRSGAQLRQEYDQLRKTDGVHQVLLPDASLAWLITNPEVAAR  
ALADPRLALNRRNSRGGWSGFALPPALDANLLNLDAPDHTRLRRLVGPAP  
SPQRVAGLRPGIRRAAEHLDTLVATSRPTDLVTGYCNPLSVQVIADLMG  
VPEAGRTNLRWTDMTLTSYPPDRDAIRQAVTELHGYYVVDLIDLKQQQPG  
DDLSSLVLTIEQDGDRLTRDELTSLAFLILFAGYENTANLIASAVLWLLD  
HGGLNEVPFAEAIEGTLRDEPPAPVAIRRFPTEDIIIRGLTIPAGDTVLL  
SIAAATRGADGNAARLAFNGPHYCLGAALARVEAEEALTVLARRLPGLT  
LAVPPAQVRWRPTFRTHGPAELLVGW

>CYP248A2 (2518147138) *Salinispora arenicola* CNB458

VLADAVTAFDPTAVDVRRDPYPSYHWLLRHDPVHRGAHQVWYVSRAFADVR  
AVLGDERFARTGIRRFWTDLVGPGLLSQIVGDIILFQDEPDHGRRLRGVVG  
PAFSPSALRRLEPTIEATVNDLLRPARALGAMDVVADLAYPLALRAVLGL  
LGLPAGDADAVGRWSRAVGRTLDRGATAEDMRRGHAAIAEFADYVERALA  
ERREDGADLLALMLAAHRSQLMRNEIVSTVVTFIFTGHETVASQLGNGL  
LSLLDHPEQSELVRRQPHLVSQAVEECLRFDPVQSNTRQLAADVELHGR  
RLRRDDVVVVLAGAANRDPGRYDRPDEFDIRRDPVPSMSFGAGMRYCLGS  
YLARLQLRTALGAMVALPDLRLVCSPNELAYQPRTMFRGLTRLPVAFTPA  
G

>CYP105W3 (2518147146) *Salinispora arenicola* CNB458

MTGYQDPPTGDQPGAPVPSGSTDPGLDAFFPLPRRCFFSPPAEYARLRAEH  
PVVRLPMLGGDTAWVVSRAHADVRLGDPRMSADRRRPGFPKFAPTTEGQ  
RQASFANFRPPLNWMPPPEHAICRRQIVDEFSAARRVRLRTLVERVVDTH  
LDALAAAAPGADLVSTFAYPVPSQVICEVLGVYPYGEHGFERRSTLMFRR  
STPADERARCAIREFLDVVVTDKERRPGDDVLSRLLYRQRSAGGVDHE  
AVVSMAFVLLVAGHVTTSNMLALSVLALLTHPARLARLRAEPKRFPAAVE  
ELLRYFTVVEAATARTATAEVTIGGVTTAAGEGVVALGQAANRDPVFEH  
PDEFDPDRDARAHLAFGHGRHICPGQHLARLEMEVALSRLFRRLPGLRLT  
MEVSDLPLKEDSNIFGLYALPVAW

>CYP107AX1 (2518147272) *Salinispora arenicola* CNB458

MTSRPTAVFDQCLLRDPHSRYNALRDQAPVHHVLTDPGAPAWLVTRYNDV  
RAAFTDPRLSVDKRFSGTDEHGSSLPPELDAHLLNRDPPDHTRLRLRLAA  
AAFTPRRVADLHPAVERIVSTLLDGLAGHDRAELIGSLASPLPLQVMHEL  
LGLPTQANIDFRTWTNTLLSADANQPAQSRAAMANMRRFLIEQLAHKRAQ  
PGDDLLTGLLAAREDDRLTDELVAMVFLLMFAGYDNTAALIGTVTHAL  
LTNAELHEAVRGGSLALDELIDEVLRWNPAFPLAVRRFAREPIAIAQGQTI  
PAGDRIWLCLASANRDPAQFTQPDDELGIVGLRRPHLSFGHGIHYCLGAPL  
ARLQTTIAVTSLNRRFPFEMRLAVPAHDIRWRESFRLRGLIALPVYL

>CYP166A4 (2518147641) *Salinispora arenicola* CNB458

MTDAISFELPWARTDKFDPPAVFDALREQRPLARMRYPDGHIGWIVSSYE  
LVREVLGDPRFSHSCAVGHFPVTHQGQVIPTHPQIPGMFIHMDPPEHTRY  
RRLLTREFTVRRTSRLTGHEGVAAEQIEVMREHGAPADLVATFARPLVL  
RVLSGLVGLPYGERDRYLHAVTLLHDAEADPAEAAAAYEQAGAYFAEVIE  
RRRRQPEDDLISTLVGDGELTGEELRNIVTLLLFAGYETTESALAVGMFA  
LLHHEDQLARLRADPTKIDAAIEELLRYLTVNQYHTYRTASEDIELHGEV  
INKGDSVTVSLPAANRDPARFACPADLDIDRETSGHVAFGFGIHCCLGQN  
LARVELRAGLSALLRAFPNRLRLAVPADEVPLRLQGSVFAVKNLPVCW

>CYP107AW7 (2518147760) *Salinispora arenicola* CNB458

VETVTGTSTPPPVPYIADPYPTLARIRANGPVSIHLSDEGIPMWVIARYR  
DVRAALADPRFGQDARRAQALADNRVAGVTLGGDIVHMLNSDPPDHTRLR  
RHVQGAFTARRVAAMRPLVERITTSLLDGLTGRTTVDLVQDFAFPLPMLV  
ICELLGFPAEERNAYRSWSTAILTHDDDPAAAFATALREMTDYIAVQLRIR  
QTQPGDDILTELLAARDAGQLTDDEIIGMVFLLLIGGHETTVNLLGTATL  
ALMRNPQHRWLLANQHALPEAIDEFLRYESPVAMATLRFTTTPVAVDDV  
VIPAGELVLVSLGGANRDPDRFPDADRLILDRDRTGHLLAFGHGLHRCCLGA  
FLGKLEGEVALGALLRRHPRALAAAEVRQLRWRDTIMLRGLESPLVSLHG

>CYP1198B2 (2518147897) *Salinispora arenicola* CNB458

MSGELTDQRAAPDVGGNPLRSLLDHGIRANPYPLFGELREAGPTAVEDGS  
VVLFGHEYEHCSQILRHRDMGSDTSEAPSIKGFVVDDAERAGSSIFFMDQP  
GHGRQRKLVSQSFTPRIVQSFGPQITRIVDGLFEDFQDKGELDVVTDLAY  
PVSIGIICDLFGIPDDERDMLKEWSDDLALSTELPTLGAAIGVLNVFTRD  
EINRFGSVAMAAHAYFADLIHRRRKNPGDDLVSLLATESNGERLTRFEV  
TSVLATLFVAAHESTTNLISGGILALLRNQDQMTVLRENPGVITNVVDES  
LRYDPPVHLAARMARATTIGGYDLDPGSIVVVLMAAGNRDPAYENPDV  
FDVNRKIKNVSLAFGAGAHFCIGSGLAKLEAEIAISAFQRLKNPEVDES  
SLEYRRHIVVRGLEHMRVSFQP

>CYP208A12 (2519863096) *Salinispora arenicola* CNH877

MTLDTITPRVPLGPPTAALRMLLVMKRDLGMLTSAAARYGDASRLPVG  
HKALWFFNHPRYAKHVLADNSANYHKGIGLVHARRALGDGLLTSEGLDWR  
KQRKVIQPAFQSRRIAQQAGMIAEEAFALVERLRARAGAGPVELTAELTG  
LTLGVLGRSLLDADLAGFDSIGDSFATVQDQAMFELETNAVPMWIPLPR  
QIRFRARRRKLQAVVDTLVDGRAGNLADRVDVLSRLILSARGEADPRVGR  
ERLRDELVTLLLAGHETTASTLGTWTLSLIDRHGPVWERLHAEAVEVLGDR  
LPEYDDLRLRLRYTVMVVEEAMRLFPPVWLLPRRALAPDTIGEYRVPANAD  
VVISPYTLHRHPEFWPNPERFDPERFAPGQAADRPRYAYLPFGAGPRFCV  
GNNLGMMEAVFVIALLCRHLRLTGVPGHRLVPEPMLSLRIRGGGLPLVVRP

VS

>CYP211C1 (2519863973) *Salinispora arenicola* CNH877

VVDVEELLTRLYSAQGRQDPFPVYADLHAQGPIAALPPEPERRRVA AVAV  
GYDLVGAVLRDPEWSKAPPPGWTEQEILRTLQTSMMFINPPDHGRMRHVF  
AGTFTPRRLGALEPVVNRVADELLDRMADAGAGGLDFVAEFAYPLPARVM  
AEFIGIPETELDWYRERVDVIDAFLDVAGKTPQRLAAANAAGAE LRAFYG  
ELLARRRRTPGEDLISGLVEAVDAGGVELTEDELVSNLIVLFNASFVTTV  
YMLSNGLPVLLAHPEVAAALATDPVLTAGAVDEILRLQAPVHLLARAAPR  
DTVLGGVPI PQGQNVLLLI AAANRDP AHFPDPDRFDPWRS GPPSLAFGLG  
LHYCLGAAVSRLEGR LALPRLLSRFPRLRIMEQPVYSGSLF LRGIDKLSV  
SPGEGSTRE

>CYP125A41 (2519864123) *Salinispora arenicola* CNH877

MTEPRIPAGFDFTDPEVLAHRVPREEFAELRR TAPVWWNAQPRGSAGFDD  
DGYWVVTRYADVMTVSRSDTYSTRENTAIARLRPDTTREDIEMQ RVIML  
NVDPP EHTKLRAIVSRGFTPRAINALRGSLAERA EHIVRDAAVRGV GDFV  
TDVACELPLQAI AELIGVPQHRRKVFDWSNQLIGYDDPAYGTDPLTASA  
ELLAYAMEMA EERQRSPSDDLVTKL VNAQIDG EHLTTDEF GFFVMLLAVA  
GNETTRNAITHGMVAF LDNPEQWELFKAERP KSAVEEII RWATPVNVFQR  
TALVDTVLGGQ AISAGQRVALFYGSANFDEAVFEDPERFDITRSPNPHLG  
FGGSGAHFCLGANLARLEIELIFNSIADHL PDIRKVAAPQRLRSGWINGI  
RQMPVRYR

>CYP245A7 (2519864463) *Salinispora arenicola* CNH877

MPSATLPRFALTGWSRENIVNPYPVYQRYREVASVHRGEPGGDAPDTFYV  
FSYDEVVQVLSSSCFGRGRSLDAAKASVPVPAEQKALRAIVENWLVFMDP  
PRHTELRSLLNRSFSPRIVTEL RPRIARIAQELL SRLGQQVDVDLVESFA  
APLPILVISELLGIPEERRAWLRANALALQEASSSRAGR DVDGYARA EVA  
AQEFTEYFREQVRLRRGRAGGDLITILANAQERGAPVSLDAIVGTCVHLL  
TAGHETTTNSLAKAVLALREHPAVLDELRGAEGLTTDAVEEFLRYDPPVQ  
AVTRWAHQD TTLGGCDIPRGSRVVALLGSANRDPARFPSPDVL DVRRPAD  
RHLSFGLGIHYCLGATLARAELEIGLQALLDGVPTLGYGTQHVDYADDLV  
FHGPSRLVLVNLGERCT

>CYP244A4 (2519864467) *Salinispora arenicola* CNH877

MSTTTNTELTEAPETNMPVDPGLFDCMPDLIAAARVAPVVRIPYLGRHAW  
VVC DRELVKQAL THPKMGKDIALVPEWMRQPGLMVTAQPDPEYARAMIMS  
DGENHARIRRIHAPVLS PRNTERWGERVADKVEGF LDEL SRAGSGGSTE V  
NVVTNYTHKIPLAFISEMLGLPPEAEHRLRGITDIMLYSSDYAARREAI G  
GLFGAVEDWVRNPADLRDGVITGLLAASDGPDAAVTEGEVIVWTLGMIIT  
GYETTGS LISTS LYEAIRRPPHERPKTDEDITAWIEETLRVHPPFPHP TW  
RFPLEDIELGGYLIPKGAPVQVSI AAANRKPGE GADSFDAERRGHGHLSF  
GLGMHYCIGAPLVRLEAQIAVRGFLRRFPQARLSAETAVQWESEWMIRRM  
SVLPAVLS

>CYP1051A1 (2519864784) *Salinispora arenicola* CNH877

MATDAAITRARTVPAWKALPAAVRDTHRALVDVGNWSDGDVVRVSLGVSR  
PYLVTNPAHVQEVLHERAAIYPRGDDTALWRSVRKLVGDGILAEGDAWAA  
SRRVLAPMFRPARINAMVDTMADA IAGAVDGLHGAATAGTPIDVGRELSR  
IVCSAIMRVFFADRITVRDALRIMKAQETIVTAMAPRILAPLVPWWIPMP  
GDRRFRAAVRSID DILLPVLRQAQRQPDDGDDL LSR LVRARADDGQALSE

KMRDDLVSMVAVTTETSTVVLTWLVPLLANHPDVANRLYDEIDRVVGGG  
PVRGDHLAELTYTRMVLDELLRLYPAGWILPRRAATTDVLGGVRINKGAT  
VILSPYVTQRMATAWWGPTAEAFDPERFAAGREAADGRHRYAYYPFGVGMH  
RCLGEHLFNLEAILIVATLLSRFRFALTDTSMPGVKVAASTRPARTVEMV  
LKPVAPVPPAR

>CYP105G5 (2519864804) *Salinispora arenicola* CNH877

LTIETTETTPPADDSLAPLPRQFMQRDDPSKLPALAAAEQSPVGRSTL  
PDGDPFWMVSGYDEARAVLSDPRFSSDRFRYHPRFKKLSGQLGERLRNDK  
ARAGSFIMNDPPEHTRYRKLLTGQFTVRRMRQLTVRIEQIVTEQVDVMLA  
EGNSADLVSAFAVPVPSLMICELLGVRYEDRTEFQRRRAAGLLQTDLPKQ  
AVENLEAQRAFMQRLVTDKRRTPADDMISGLVHHAGAEPPLTDDELVGIA  
TLLLFAGLDTTASMLGLGMFMLLQRPEQMAVLRDDPSRIGDAVEELLRYL  
TVVSTGLFRFAKEDVVLGDEHIPAGSTVVVSLMAANRDGRHWPEPETLDV  
TRVRSSHLAFGHGVHQCLGQQLARIELTVGITELLRRLPNVRLAVPPADV  
PLRNDMITYGVHRLPILWDTP

>CYP107Q4 (2519864805) *Salinispora arenicola* CNH877

MTTTAETSATIDLFSPEVVADPFGWYARLREETGPTTGTNLNIGTMMGGP  
EMWLVTRYEDVRQVLTDPFRFLTNPADSPLEDIRAGVFKRLDFPPDLIPW  
MANLLNVSDGEDHTRLRKLVSALTARHIGKLRPRVEKITADLLDKLAED  
GKDGSPVDLVEEYCYPLPVTVICELVGIDEPDRPHWRAGDSMATMNGER  
IPTTLVKCIELARELIAKRAEPQDDLVTALVQAQAEQNRVSDDEIIGI  
LFSLVTAGHQTTTYLIGNSVILLLENPDQLARLKENPSMWPQAVRELQRL  
GPIQFAQPRFSEDIELGGVTIPRGAPVAPLLLAANTDPRRFDPNKLII  
DRLAVGSEHGLGFGKGIHRCLGQHLAYQEAEEVALQGLFTRFPDLSLAVPR  
EEIPWILRPGFTRTRTLPLKLV

>CYP105CP2 (2519865122) *Salinispora arenicola* CNH877

MTKSMPVQDLPAFPIPRECPYRPSAQHVSLRSGGPMKVRLYNGRTAWLV  
TDSAHARAVLSDYRRVSIKPYHGNYPILLNEEFKVVDSGYADVLFGVDPP  
EHTRQRQMIMPSFTLRRATAVLRPDIQRIVDDKLDEMRRHGAPGDLVTEFA  
QPVPSPMVISFLLGVPWEDHEEFETPAHKLFVPELAEEATTELGAYLERLI  
QKKEQPGGTPGGTGLLDDLIRDHLRAGALSDELVHIAMAMLVAGTDTT  
NVISLGTALLLDNPQWAAALRDNPDDELIPGAVEEILRYTSLIEAFARVAV  
SDIELNGAVIKEGEGILISSAGVNFDPALAPDPGRFDIRPPRPSFSFSH  
GIHRCPGDNLARLELEIAFRSLVTRMQNLRATAKPIDQIPSNNDGTLQRL  
YELPVVW

>CYP105CN1 (2519865124) *Salinispora arenicola* CNH877

MAAPAPQATPSTTPHPPSYPLPRECPYRPSAGTAHLRDAGPVSTVRLYDG  
RTAWLVTGAAEARALLADSRVSNRADFPNYPVMDEHLSMRATREMAREE  
EGGFAAALFGMDPPEHTRQRQLLLPRFTVRQVAARRPAIQRIVDEHLDAM  
EANGSPADLVSAFATPVPTMVVCTHLGVYPYQDRTRFEPVAGLFEPPDRAD  
AAMAEALTAYLHQLIETKQSEPGDGVIDHLIANHLRPGAIDRAELVAIASA  
ILVAGTVTTSSAIALGTALLLTAPGQYTALVDNPDLPVGAUNEILRYLSL  
VEQLARVATEDIEIGGKLIRAGDGIIVSFAAGNLDPNVTTHPDRLDVALP  
PTNHLAFSHGIIHCIGQNALLLELDIAFRALVSRFPTLRLAVPAEQLPY  
FAGDVPRLACLPTVW

>CYP107FS2 (2519865125) *Salinispora arenicola* CNH877



MPVPQGEQNLTTTEVFADPKALFATLGSRQPLHRISLPDGMFAVLVTGNRE  
ARQALSDPRLVRSITAAAPELHKYHPLASDDYALSRHMLFADPPDHGRMR  
KLVSTAFTRRRVEQMRPRIQQITDDLIDVIAAKGEADLVETLALPLPIAV  
ISEMLGVPFADRSEFERHAEVLGTGINASSGFDIAAAGRWFDEYLAGLVQ  
QRRREPQDDLISGMLAAQDKGDRLLTDVELRSNALLLSAGFETTVNLIAN  
GLLALLRHPEAMAALRSEPNLMTTAVDELRLRYDSPVSCVTYHFAQEPVEI  
GGFEIRSGEHVVIAAAAAANHDPTVFAAPSRLDLRREGSGQILSFSGIHF  
CLGAPLARLEGEIAFGTVLRRLAGLRLAVPTDSLWVKASFVLHRLERLPV  
TFTPDRDPNPIDSVHTV

>CYP125G6 (2519865163) *Salinispora arenicola* CNH877

VPTLLNEHVSYDGAIAIVDSGATSWIRLAERVNRVHLLRAHGLDTGD  
RLACVTGNRRETFEVLLAALHTGVTVPVNWHLTVTEIGHILSDSGSRVV  
ITEELHVKAVAAAADGTAGPVAGLVLGDRVEGFAAVEPLLAASPAEPE  
GQVCGATMLYTSGETGRPKGVVNNLFVTGAPYARVGRLCDYARSVLGVP  
RERMLLDGPWYHSSQLFFALLSLQGSRLVIRPYFDPAATLKTIDHRIT  
VTHLVPTQLVRLLRVDALTRQMFSGASLRRVWHGGGCPPEVKRSMIDWW  
GPVLVEYYGATEGGVVTLIDSAEWLARPGSVGRAVPPSEVVVVDDGGQPV  
AAGQTGQVFFRRRTGNRFHYHNAPEKTQAAYLAPDTFTTYGEVGHVDE  
LFLTGRAQDMIVSGGVNVYPAEVEAALLRHPVVRDAAVIGVADDEFGERV  
VGIVVPETAVDPPDLATHLDAHCRVSLAGFKVPRTYRVVESLPRDET  
RKDALRSKFGWLSGAAMTVPRPATGQPTAHRPDIAHPTTYVSGVPHDE  
FAARRRDEFPVGWVAEPVLTRHTAAGRTATRGSGFWAVTRYEDVVAAS  
RRVTD FSSAAKGAFLLTDPRTPADLQQAQQLLVNMDDPHHARLRKL  
VTSVFTPRAV RGLLASIDAHAAALVAKVVAAGEFDVVTDLAAELPL  
LVLADLLGVPKQDR ALLYGWSNHLVGFDDPDFGGGDIDAYRTAMAE  
AFQYALNLGVERRARPTD DLVSLLANAEVDGTRLTDREFCNFWLL  
LVVAGNETTRHLIAGTMQALTEH PGECARLVEGRVPMESAVEEL  
LRWVTPIMQFRRTATRDTEIGGQAVTAGE KVVLYYTSANRDATV  
FAEPDRLDLGRTPNRQLSFGIGPHYCLGAHLARAE LTALLRVMS  
PHLGSLQLTG PVSRLASNFVNGVKAMPAVIGSR

>CYP154M15 (2519865188) *Salinispora arenicola* CNH877

MNDKCPFAALDVTGQDLHGEEARLREQGPAVLVELPGGVKAWSINRYEVI  
RELLMDRRVTKNARKHWPFIKGEIPPDWEMISWVAMDNMVTAYGKDHVR  
LRKLVGRAFTQRRADALRPQVVALSTKLLDDL GATPPGEVVDLRERFAYP  
LPAMLVASLIGMSEAAALACSKVIDMMVHTNVSPEEAQAVLRGWRAAMAD  
LIESKRRTPGEDITTDLIAAREEDGSRLSEAELADTIFAILGAGSETTIN  
FFDNAITALLSRPGQLQLRTGAVTWDDVIDEVLRVESPLAHLPLRYAVE  
DIELDGVTIPQGDPILVNYAAAGRDPALHGGTADEFDLARGDKTHLSFGY  
GPHYCLGAGIARMVATIGLSMLFERFPDLSLAVPVTELKRLPTFIMNGHQ  
TLPVRLTAHAR

>CYP107AX14P (2519865342) *Salinispora arenicola* CNH877

VTSPPHVAFGHLLRDPHGQYNALRGQAPVHHIRTPDGAPAWLVMRYHDV  
QAALTDLRLSVDKRFSDTDGEHGSSLPPELDAHLLNRDPPDHTRLRLRLAA  
AAFTPRRVADQAPAVATIVDALLDGIADQDQAEILGALASPLPLQVMHEL  
LGLPTQTSVDFRNWTNTLLSADANQPAQSR SAMATMRRFLMGQLARKRAQ  
PGDDLVTGLLAARDDDRFTDDELLAMVFLLMFAGYDNTAALIGNVTHAL  
LTDAGLHDAVRAGSVDDLDSVVDEVLRWNPSFPLAVRRFAREFVTPSRQAI  
ASGSAWPARTATPHSSPNPTN

>CYP166A4 (2519865358) *Salinispora arenicola* CNH877

MTDAISFELPWARTDKFDPPAVFDALREQRPLARMRYPDGHVGVIVSSYE  
LVREVLGDPRFSHSCAVGHFPVTHQGQVIPTHPQIPGMFIHMDPPEHTRY  
RRLLTGEFTVRRTSRLTGHVEGVATEQIEVMREHGAPADLVATFARPLVL  
RVLSGLVGLPYGERDRYLHAVTLLHDAEADPAEAAAAYEQAGAYFDEVIE  
RRRRQPEDDLISTLVGDGELTGEELRNIVTLLLFAGYETTESALAVGMFA  
LLHHEDQLARLRADPTKIDAAIEELLRYLTVNQYHTYRTASEDIELHGEV  
INKGDSVTVSLPAANRDPARFACPAELDIDRETSGHVAFGFGIHCCLGQN  
LARVELRAGLSALLRAFPNLRRLAVPADEVPLRLQGSVFVAVKNLPVCW

>CYP105BL2 (2519865512) *Salinispora arenicola* CNH877

MSSHSAAAPDPETATPLHTLAPELAFFPQFERSAPFDPPQAYTELSGRCPV  
APVSMADGKPSWLITSFEGVRTTSLDPHFSSDMSHPGFPNRTGKPVDDLL  
KDTLGAMDGERHRYRRLMTGELTVRRAKAMRPVITQITDEALDQLAAAG  
PGADLVKHVAFVVPSPRVACHLVGIPLSYELFTGMAATLMDSTSSDDQFA  
ALQNMVSYFDTLVTDREHHRDRLGDMVRRYLATGELTRDMLIRLAWTT  
MAAGQETTAHMIIGLVAALLRHPDQLELLRREPHLLPGAVDELMRYLPLI  
QFGIPRVAMDDVEVDGQTVTAGEGVVALPPLANRDPVFERPDELDVRRN  
ARQHLTFGYGPHQCPAHALARLELEVYGRLLERFPTLRLADSDADLKVQ  
DKDIMYRVSELAVTW

>CYP105J3 (2519865651) *Salinispora arenicola* CNH877

MTDSVAFPPQGRVCPHPAPGYRPLAVQRPLAQVTLYDGRRVWAVTTRDLA  
RRLLVDPRISSDRTPAWPAIVPIVAAAVNDAQQKVLKIATALVGTGPE  
HKAQRKMLIPSFTFRMNALRPMIQEIVDQQLDDEMIKSGAPTDLIPAFAS  
AVPVTVLYRLMGIPDDDHGIFEKLSHQLLAGPNANEAYDQLMGYMSRLIA  
ERRRNPGEGLVDDLLAQHGANDDADHDELVSTLVVQVAGNHGTTGSMIAL  
GLFALLQHPEQLAELRADPSLMPTAVDELLRFLSVPDAVTRLAADDIEVE  
GTVIRKGDGVFFITSLINRDTDVHDAPNSLGWHHASAADHLTFGFGAHQC  
LGQSLARITMEIALGALIDRLPSLRLAVPAEEVPFLPAASLQVIAELPIT  
W

>CYP1005A1 (2519865971) *Salinispora arenicola* CNH877

VSAVLFRSWTKTAGTRWPDVTRVADQSGTEHLVVTRHALVRQVLTDQATY  
RPDNALAEAVTPVPVAALRVLAGHRFRLPPTLANNGGVSHPAIRALVADAL  
HPTKVAAQRPWLTTELVA DRVATIRTTLDSGGPVDLYADLTADLPLLVLAR  
LVELPDAPVNAVKKQFARAALFWAPLDADRQLALADEVGRFHVQLREFA  
DTGGGLAAALRATGHPPDVLVGALFFLLVAGQETTSQFLTLLHRLTDEP  
TIRAALRAGSISVADVVEEGLRLEPPIVTWRRVAAVDSTLGTTVVAGTS  
VLLWLLARAGRDPVVAAPDEFPRPGQRGSRRLAFGAGAHRCCLGDQLARME  
AAVVVEQATPLLDGVTIVRPPWYPDNLTFRMPDAFVVRR

>CYP105CH1 (2519866600) *Salinispora arenicola* CNH877

VSSLPLPTYPKLRDPADPLLPAPAEYLAIQSEKPIAKVLLPSGRPTWLITG  
HALARQVLTEPCVSVDRRHPPNFPYPVPNPDAVVAQVARWTYILLGDDPPL  
HTERRRLLISEFTVRQAQAMRPRIQQLVDFHLEQLIAAGPGADF SKHFAM  
KVPSAVICEMLGVPFADHDYFQERTALQLRRDVPVAAQKQAIDELLAYFE  
QLIQEKSSHPGDDVLSRLIVSNRETEAFDHEALVALGLLLLVGGHETTAN  
TLTLATATMLERPEIAEQLRDPSLMPSAVEEFLRYFSVAVAVSRIATAD  
LQVGGQLVRAGESMLLVNLTARDGTVFPEPHRLDIRRNARNHLAFSHGI  
HQC MGQNLARVEMQIALD TVLRRLPGLHLVTPFEELPFKYRHLVWGIEEL

RVAW

>CYP107FJ2 (2519866684) *Salinispora arenicola* CNH877

MSETLSTSVLLADAAEQRAWRAKLRGAGPVHRITTSGETGWLIVGHEEA  
RNALVDLRLQGRTATVGHGRMPEDLERALNSHMLNVGPPDHTRLRRLVS  
AAFTRRRIEQMRPRIQELTDELLDGLAGADEADLVAGLALPLPMRVLVDL  
FGIPAEDCADFNVTKVLTSAAGVLDRLTTAAGEMVAYLRGLLDRKRQV  
PESDLSALVAVRDGADRLSDDELTSMVYLLLTAGYETTVNLIGNGLLNL  
LANPEQLVAFKADPDLLPQVVEEAMRFDSPVQIAVRHSTEPVEIAGQAIP  
SGALILVSLWANRDPDRFTEPEVFRVDRQDNPQLGFGYGFHHICIGAPLA  
RMEGTVAIGTVIRRFAPALRLAHPASSLTWRASMVMHGLTALPVHLR

>CYP154M20 (2519866691) *Salinispora arenicola* CNH877

MERCPYVLDRAGDLHGEAKALRARGPVTLEVELHGGYTASVTSYEIAKQ  
LLVDPRIKNTKETWPEFREGKVPQDWELYTWVAMDNMQTRDGEHDLRLR  
KLVAQAFTTRQVAKVRPMIEDIVDRLLDDLEKVPAGEVVDIKGRYFYPLS  
TILVCDLLGIPEADRAEALHGTVVNARTTNSAESEANLHQWQSALSKLV  
ETKRREPGNDITTLIIKAREDEQAPLTDDEVIGSLHLLIGGGTETTSNVL  
CNTLIDLTHPDQMAMIRSGAVGWEEAWEVEVRKDGAVGSMPFRCANADI  
EIGGVTIKAGDLVLINYAAAGRDPERYGDTTAEFDITRADKTNLSFGYGR  
HRCGLPALATMEAMISLPALFERFPDLVLAVPRDELKPQGTFFVNGYAEV  
PMLLRS

>CYP248A2 (2519866715) *Salinispora arenicola* CNH877

VLADAVTAFDPTAVDVRRDPYPSYHWLLRHDPVHRGAHQVWYVSRAFADVR  
AVLGDERFARTGIRRFWTDLVGPGLLSQIVGDIILFQDEPDHGRLRGVVG  
PAFSPSALRRLEPTIEATVNDLLRPARALGAMDVVADLAYPLALRAVLEL  
LGLPAGDANAVGRWSRAVGRTLDRGATAEDMRGHAAIAEFADYVERALA  
ERREDGADLLALMLAAHRSQIMSRNEIVSTVVTFTFTGHETVASQLGNGL  
LSLLDHPEQLELVRRQPHLVPQAVEECLRFDPVQSNTRQLAADVELHGR  
RLRRDDVVVVLAGAANRDPGRYDRPDELDIRRDPVPSMSFGAGMRYCLGS  
YLARLQLRTALGAMVALPDLRLVCNPNELAYQPRTMFRGLTRLPAFTPA  
G

>CYP105W2 (2519866723) *Salinispora arenicola* CNH877

MTGYQDRPTGDQPGAPVPSGSTDPGIGAFPLPRRCPFSPPAEYARLRAEH  
PVVRLPMLGGDTAWVVSRHADVRQVLS DPRMSADRRRPFGFPKFAPTTEGQ  
RQASFANFRPPLNWLDPPEHAICRRQIVDEFVRRVRQSRALVERVVDTH  
LDALTAAPGADLVSTFAYPVPSQVICEVLGVYPYGEHEFFERRSTLMFRR  
STPADERARCAREIRDFLDVVVTDKEHRPGDDVLSRLLYRQRRAGGVDHE  
AVVSMAFVLLVAGHVTTSNMLALSVLALLTHPARLARLRAEPPERFPAAVE  
ELLRYFTVVEAATARTATAEVTIGGVTTAAGEGVVAVGQAANRDPRVFEH  
PDEFDPDRDARAHAFGHGRHICPGQHLARLEMEVALSRLFRRLPGLRLT  
MEVSDLPLKEDSNIFGLYALPVAW

>CYP154M13 (2519866736) *Salinispora arenicola* CNH877

MSTGRPVVLDPTGRDIHGEADHLRALGPATLVELPGGVLAWSINSYEVGK  
ALLSAPNVSKSARRHWPAYNGEIPPDWEMISWVAMDNISTTFGGDHRRRL  
RRLTAKAFGSRRAEQVRPMATHMVNTLLDRMADAADAGEVVLDLKAFAFYP  
LPGMLVAELIGMSEEARVAAKVIDMMTATNITPEQAQGVLLGWRDAITD  
LIALKRAQPGDDITSDLIAARDEDGSLLTEQELVDTIFAILGAGSETTIN

FFDNAITQLLTHPEQLELVKSGQVSWDDVIEEVLRLLESPLASLPMRFAVE  
DIQLDGVTIHRGDPILINYAALGRDPALHGESAGVFDVTRQHKEHLSFGH  
GAHYCLGAGIARMVAKTGLSALFERFPRMTLAVSATDLVPYPTFIMNGNR  
QLPVHLSGALTWREGEQSALGRA

>CYP154M21 (2519866737) *Salinispora arenicola* CNH877

MEKCPYVLDRAGSDIHKEASNLARGPVTLVELHGGYTAWSVTSYEVAKQ  
LLMDPRISKKTKAHWPEFRDGNVPQDWELYTWVAMDNMQTRDGKEHDRLR  
KLVAFAFTGRQAVKSRPIIEEIVNRLDDLETA PRGQAVDIKARYFYPLS  
TILVCDLLGIAEEDRDVILHGNVNSKTTNTAESEANLHQWQTALGRLV  
ETKRRDPGDDLTTVIIKAGEDEQTPLTDDEVIGSLHLLIGGGTETTANVL  
CHTVVDMLTHPDQLAMVRSGAVSWESAWEEEVKDGAVGSMPPFRCATDDV  
EIGGVTIAGDLVLINAAAAGRDPERYGDAAAEFDITRADKANLSFGYGR  
HRCLGPALATMEAMVALPALFDRFPNLALAVPPNELKPPQGTFFNGYAEV  
PLLLRS

>CYP211B2 (2519866801) *Salinispora arenicola* CNH877

MDVSEAI AVLISPSGRLDPYPTYEQ LRAHG PVSQTTAGLFVVTGYAEADM  
VLRDPRFVVLDDDLRDDVFPHWQDSPA KSIARSMRLTNPPDHSRIRRLA  
AGAFTPRRVAAMREVVTQADELVD EMIRAGRDGARVDFMDMFAYPLPVA  
VICALLGVPAADRSRFRRWAGDLTGILEPEITPEELAGADAGADELRDYF  
TGLIEQRRRAPADDLTALVQAHDADGDRLSGEELLANLVVLLVAGFETT  
TNLLGNGLVVLLTRPEAAAAALRDEPD LAPGYVDELLRYDSPVQLTTRTVR  
ESVSFAGTELPA GSWLLVLLGAANRDPRRFPDPARFDPGRAQSQPLSFGA  
GPHYCLGAGLARLEAQVAFPLLLRRLPELALAGRPSRRTRLTLRGYETLP  
ITVGAVTADRGT PAGVAPGTP

>CYP105AB8 (2519866881) *Salinispora arenicola* CNH877

MTETASSRLTDTEFPVQRECPFAEPVEYEQIREQSSIAMVRLTGGGEAWW  
ISGHEQGRAVLADRRFSSDRKANFPFVSTDPAIRKRLHAQPLSLISMDG  
AEHTQARRALIGEFTVRRLAALRPRIQQIVDQCIDEMLTDDQHCADLVKT  
LSLPVPSLVICELLGVPYADHDFQEH TATLVRRNTASEVRQHSIDELNA  
YLGALIDRKLASPDDDLGRQIARQHRDGTFRSSMVSLAFLLLVAGHET  
TANMISLGVVGLLQHPEQLAMIKDDPKTPLAIEELLRFFTIVDSVTSRV  
ATEDVRFGDTTINAGDGVVVVSGLSADWDPTVFADPDRLDLERGARHHLAF  
GFGPHQCLGQNLARLELQIVFDTL FHRIPTLRLAAPLDKIPFKTDAAIYG  
ARELPVAW

>CYP107EU1 (2519867088) *Salinispora arenicola* CNH877

VTIGQTL PDLVYSPEFTRDPYAIFARLREQAPVCRVTTHRGMSAWMVTRH  
ADV RALLADNRLAKDGNRIGELMPRHSTLTGAATGFPPGLTNNMVNSDPP  
DHTRLRHLVGREFTGHRVEGLRPRIEEIVDDLLDGVAACGDEADLAETLA  
RRLPIAVIGELLGVPEADRAEFFRWADTLYGGTASPEALGQAYNAIVDYL  
GRLCDAKRDPADDLLTALVQVSADEDRLSREELVSMALLLLLVAGHETTS  
KQISNGVLALLLNPEQLKLLKAQPARTAGAVEELLRFEGPSLSASLRETT  
EPVEVAGVVIPEGEFVLLSLASGNRDPEKFPDPDRLDITRYTQGNLAMGH  
GIHHCVGAALARLELEIVLSRLVARFPQMQLAVEADDLEWLNVNSFFRAPL  
HLPVSLRR

>CYP162P1 (2519867200) *Salinispora arenicola* CNH877

MGLPSEVDLADPDLYAEGDPDAEWAWLRAHRPVYRNPAGATAEFWALTRY  
RDALQVYRDPSTFSSERGMVLGVDPVAGDPAAGRMLVVTDPPRHPKLRR  
VSGIFVPRMTMRLEGRVRSIVDQQLLHRVVDGAGRCDFVNDVAARLPVAII  
CELLGVPADEQDWMYHLTSTAFGGGDPAGSAEVS AVERAEAYGDILLYYG  
ELAAERRRRPGDDLVTLLVHADLDGEPLDVEDVLVNCTNLIIGGNETTRH  
AASGGLLALAQRPELWRRRLRETPTAVPTAVEEVLRWTTPGMHVLRATRD  
TEIGGVPIRAGERVVVWNAANRDEDVFADPQRFIDRSPNRHIAFGQGG  
HHCLGAALARLELTILFEEMAKQVTNVRLTGPVRRVRSCVLRGIRALPVE  
LVT

>CYP107AY2 (2519867417) *Salinispora arenicola* CNH877

MTAEPTPIPRSGARLGQEYDQLRKTDGVHQVLLPDASLAWLVNPEVAAR  
ALADPRLALNRRNSRGGWSGFALPPALDANLLNLDAPDHTRLRRLVGP  
SPQVAALRPGIRRAAEHLDTLVATSGPTDLVTGYCNPLSVQVIADLMG  
VPEAGRTNLRATDTMLTSYPPDRDAIRRAVTELHGYYVDLIDLKQQQPG  
DDLSSALVTIEQDGDRLSRDELTSALFLILFAGYENTANLIASAVLWLLD  
HGGLNVVPISEAIEATLRHEPPAPVAIRRFPTEDIIIGGVTI PAGDTVLL  
SIAAATRGADGNAARLAFNGPHYCLGAALARVEAEALTVLARRLPGLT  
LAVPPSQVRWRPTFRTHGPAELLVGW

>CYP162M2 (2519867834) *Salinispora arenicola* CNH877

VPATVDLADLDLYASGDPVATWARLRATTPVFWNQHPGPGFWSVTTYQP  
ALEVYRNTSAFTSELGMRVDS DPAAVKAAAGKMLIVTDPPSHQRLRQLMN  
AAFVPRVVATLEESMRVIEPLLDQALEKESIDFVSEVAAVLPAAIISDI  
MNVPQTERATMIKLTSAFGASVGASSGCPMDQLQKTEAHSEIFLYYADL  
VEDRRRDPGDDVVSALLRGDL DGRPLTNEEVLLNCDGLVTGANETTRHAS  
AAGLIALVENPDEWHRLKTGEVSI E SAVDEV LRYTSPALHVMRVATRDVE  
IGGQQVSAGESVVVWNSSANRDG SVFPDPDRFDLGRTPNRHLTFGMGP  
CLGAPLARVELKILLQVLVERVSRVEITGPVRRTRSNFMWGIDHLPVALS  
RERR

>CYP163A11 (2519867837) *Salinispora arenicola* CNH877

MPHSTSLDGSPLLHVDLTDP RVHAEQDLRPLFGKLRAGRPVAWHPPRSSD  
GRGFVWVTRHADMKAVCRDADR FVSTGGNVLSTLLARGDSASGRMLAVSD  
GYRHSRLRRLWQALTPAALASLRERVFAATRSLILAALDDGDIDFARDV  
AAHIPLTAICDLGVDPADRPFILRHTSAALS GESAQEANAAGTRLSQGE  
LLLYFARLARIRRSEARNDLISLLARGTV DGERLTDDEVVFNCYSLILGG  
DETRRLTMISSVRALVEHPDQWRALKNGTVSLKSATEEVLRWTS PAIHVG  
RTAMRDSVLRGEQIRAGDVVTAWT L SANFDEAEFDQPLRFDL SRAPNHHL  
AFAYGPHFCIGAH LARIEIAALLAGLREFVGAIDETGPARPVYSTFLRGF  
SSLPVRLHP

>CYP244A7 (2519867849) *Salinispora arenicola* CNH877

VRVTSSNLAEAPEVTMPVDLRPTDCLPELLAAARVAPVVRTRYLDQHAW  
IVCDRELVKQALTHPKLGKDITLAPDWMRKPGQMV TAMPPPEYARMMITS  
DGENHSRIRRLHAPVLS PRNTERWGKRVATLADELLDELDSGDNAE VNVV  
TDYTHKVPLAFTSEMLGLPPGAERRLHDITEVMLYSADYALRQQA VEELF  
EAVQDWVRNPAGLYDG VITGLLASSDEEDVTVTEGEVIVWTL SLVINGYE  
TTGSLISAALYEALRRPVRERPHTDEDIAAWIEEALRVQPPVPHTTWRFA  
LEDLSLGGYLIPKGA PVQVSIAAANRDPNEDTDGFDAERRGRGHLSFGRG  
VHYCIGAPLARLQAQIALHGFLQRFP RARLSADTAPQWESEWMIRMSVL  
PALLA

>CYP1198B1 (2519868026) *Salinispora arenicola* CNH877

MSGELTDQRTAPGAGGNPLRSLMDHGIRANPYPLFGELREAGPTAVEDGS  
VVLFGHEYEHCSQILRHRDMGSDTSEAPSIKGFVVDDAERAGSSIFFMDQP  
GHGRQKRLVSKSFTPRIVKSFGPQIITHIVDGLFEDFRDKGELDVVTDLAY  
PVSIGIICDLFGIPDDERDMLKEWSDDLALSTELPTLGAAIGVLNVFTRD  
EINRFGSVAMAAHAYFADLIHRRRKNP GDDLVSLLATESNGERLTRFEV  
TSVLATLFVAAHESTTNLISGGILALLRNQDQMAVLRENPGITNVVDES  
LRYDPPVHLAARMARARTTIGGYDLDPGTIVVVLMAAGNRDPRAYENPDV  
FDVNRKIRNVSLAFGAGAHFCIGSGLAKLEAEIAISAFQRLKHPEVDES  
SLEYRRHIVVRGLEHMKVSFQP

>CYP105BL2 (2519836560) *Salinispora arenicola* CNS673

MSSHSAAPDPETATPLHTLAPELTFPQFERSTPFDPQAYTELSGRCPV  
APVSMADGKPSWLITSFEGVRTTSLDPRFSSDMSHPGFNRTGKPVDDL  
KDTLGAMDGERHRYRRLTGELTVRRAKAMRPVITQITDEALDQLAAAG  
PGADLVKHVAFVVP SRVACHLVGIPLSYELFTGMAATLMDSTSDDQFA  
ALQNMVSYFDTLVTDREHHDRDDLGHMVRRYLATGELTRDMLIRLAWTT  
MAAGQETTAHMI GLGVAALLRHPDQLELLRREPHLLPGAVDELMRYLPLI  
QFGIPRVAMDDVEVDGQTVTAGEGVVALPPLANRDPVFERPDELDVRRN  
ARQHLTFGYGPHQCPAHALARLELEVYGRLLERFPTLRLADSDADLKVQ  
DKDIMYRVSELAVTW

>CYP208A12 (2519837303) *Salinispora arenicola* CNS673

MTLDTITPRVPLGPRTAALRMLLVMKRDRLGMLTSAAARYGDASRLPVG  
HKALWFFNHPRYAKHVLADNSANYHKGIGLVHARRALGDGLLTSEGD LWR  
KQRKVIQPAFQSRRIAQQAGMIAEEAFALVERLRARAGAGPVELTAE L TG  
LTLGVLGRSLLDADLAGFDSIGDSFATVQDQAMFELET LNAVPMWIPLPR  
QIRFRARRRKLQAVVDTLVDGRAGNLADRVDVLSRLILSARGEADPRVGR  
ERLRDELVTLLLAGHETTASTLGWTL SLIDRHGPVWERLHAEAVEVLGDR  
LPEYDDLRLRLRYTVMVVEEAMRLFPPVWLLPRRALAPDTIGEYRV PANAD  
VVISPYTLHRHPEFWPNPERFDPERFAPGQAADRPRYAYLPFGAGPRFCV  
GNNLGMMEAVFVIALLCRHLRLTGVPGYRLVPEPMLSLRIRGGLPLVVRP  
VS

>CYP154M5 (2519837482) *Salinispora arenicola* CNS673

VEQSCPYKLDVTGRDVHAEGEAIRARGPVAQVELPGGVQGWSVTGYQAAR  
QVLADPRFAKDPKKWPAYTSGAIPPNWPLIGWLLMDNMTTNDGADHQRLR  
KLVSHGFTPRQVERTRPLIVKIVNDLLDGLSSAGPDEVVDLKGRFATPLP  
ARVICDMFGVPEALRASVLRGAQVNVTS SISGEEAEANVEQWHRELLELV  
EAKREKPEDMASLLIAAKEEDGSTLTQEEVVGTLHLMLGAGSETLMNAL  
SYAVLGMLSNPGQYEMVRNGTSSWDDVIEETLRAQAPVAQLPLRYATEDV  
AVGGAVIKAGDPVLMGFTAIGRDPVHGETAGDYDITREDKTHLSFGHGV  
HFCLGAPLARLELKIALPALFERFPNMTLAVRPDQLEPQGT FIMNGHREL  
PVRLGQPATVLA

>CYP105CT1 (2519837499) *Salinispora arenicola* CNS673

MNSPNHMPADRSLTAPTSGCPMALSRGRVGLDVADEISELRDGGRLGRIT  
TAFGQEATLITRYDEVRAQMADSVVFNVAGVPSPPALVDGGFDTESVRRR  
RTVGNLIMLDPPEHTRLRRMVAAWFTTRRVERLRPRVVEIIDAALDEMER  
SGPPVDLVAMFAKTVPITVICELIGVPEELRERYRRRAERAVSASAVSTP

LDELRLREAGWVSRELIEYHRENPSDDIIGMLLREHGTDSDHDDGITDDE  
LVGLANALLIAGHETTTQMLSMGTLALLRHPDQLALLRDDPSIVAGAVEE  
LLRYVGV LHGGFVRVATRDTRLGGHRIHAGELVVPALTAANRDPRLITDG  
DRLDITRPPTSHVAFGHGVHFCIGAPLARMELREAFALLRRFPGLRLAV  
PDSELEFTQGTTVYSLRGLPVTW

>CYP107AY2 (2519837531) *Salinispora arenicola* CNS673

MTAEPTPIPRSGARLGQEYDQLRKTDGVHQVLLPDTSLAWLVTNPEVAAR  
ALADPRLALNRRNSRGGWSGFALPPALDANLLNLDAPDHTRLRRLVGPAF  
SPQ RVAALRPGIRRAAEHLDTLVATSGPTDLVTGYCNPLSVQVIADLMG  
VPEAGRTNLRATDTMLTSYPPDRDAIRQAVTELHGYYVDLIDIKQQQPG  
DDL LSALVTIEQDGRLSRDELTSLAFLILFAGYENTANLIASAVLWLLD  
HGGLNVVPSSEAIEGTLRHEPPAPVAIRRFPTEDIIIGGV TIPAGDTVLL  
SIAAATRGADGNAARLAFGNPHYCLGAALARVEAEEALTVLARRLPGLT  
LAVPPSQVRWRPTFRTHGPAELLVGW

>CYP211C1 (2519837760) *Salinispora arenicola* CNS673

VVDVEELLTRYSAQGRQDPFPVYADLHAQGPIAALPPEPERRRVA AVAV  
GYDLVGAVLRDPEWSKAPPPGWTEQEILRTLQTSMMFINPPDHGRMRHVF  
AGTFTPRRLGALEPVVNRVADELDRMADAGAGGLDFVAEFAYPLPARVM  
AEFIGIPETELDWYRERVDVIDAFLDVAGKTPQRLAAANAAGAE LRAFYG  
ELLARRRRTPGEDLISGLVEAVDAGGVELTEDELVSNLIVLFNASFVTTV  
YMLSNGLPVLLAHPEVAAALATDPVLTAGAVDEILRLQAPVHLLARAAPR  
DTVLGGVPI PQGQNVLLLLIAAANRDP AHFPDPRFDPWRSGPPSLAFGLG  
LHYCLGAAVSRLEGRALPRLLSRFPRLRIMEQPVYSGSLFLRGIDKLSV  
SPGEGSTRE

>CYP125A41 (2519837908) *Salinispora arenicola* CNS673

MTEPRIPAGFDFTDPEVLAHRVPREEFAELRRTAPVWWNAQPRGSAGFDD  
DGYWVVTRYADVMTVSRSDTYSTRENTAIARLRPDTTREDIEMQRVIML  
NVDPPEHTKLRAIVSRGFTPRAINALRGSLAERA EHIVRDAAVRGV GDFV  
SDVACELPLQAI AELIGVPQHRRKVFWDWSNQLIGYDDPAYGTDPLTASA  
ELLAYAMEMAERQ RSPSDDLVTKL VNAQIDGEHLTTDEF GFFVM LLA VA  
GNETTRNAITHGMVAFLDNPEQWELFKAERP KSAVEE IIRWATPVNVFQR  
TALVDTV LGGQAI SAGQ RVALFYGSANFDEAVFEDPERFDITRSPNPHLG  
FGGSGAHFCLGANLARLEIELIFNSIADHL PDIRKVAAPQRLRSGWINGI  
RQMPVRYR

>CYP245A7 (2519838092) *Salinispora arenicola* CNS673

MPSATLPRFALTGWSRENIVNPYPVYQRYREVASVHRGEPGGDAPDTFYV  
FSYDEVVQVLSSNCFGRGRSLDAAKASVPVPAEQKALRAIVENWLVFMDP  
PRHTELRSLLNRSFSPRIVTEL RPRIARIAQELL SRLGQQVDVDLVESFA  
APLPILVISELLGIPEERRAWLRANALALQEASSRAGR DVDGYAQAEVA  
AQEFTEYFREQVRLRRGRAGGDLITILANAQERGAPVSLDAIVGTCVHLL  
TAGHETTTNSLAKAVLALREHPAVLDELRGAEGLTTDAVEEFLRYDPPVQ  
AVTRWAHQDTTLGGCDIPGRSRVVAL LGSANRDPARFPSPDVL D VRRPAD  
RHLSFGLGIHYCLGATLARAEE IGLQALLDGVP TLGYGTQHVDYADDLV  
FHGPSRLVLVNLGERCK

>CYP244A4 (2519838096) *Salinispora arenicola* CNS673

MSTTTNTELTEAPETNMPVDPGLFDCMPDLIAAARVAPVVRIPYLGRRHAW  
VVCDELVKQALHTHPKMGKDIALVPEWMRQPGLMVTAQPDPEYARAMIMS  
DGENHARIRRIHAPVLSRPNTERWGERVADKVEGFLELSQAGSGGSTEV  
NVVTNYTHKIPLAFISEMLGLPPEAEHRLRGITDIMLYSSDYAARREAIG  
GLFGAVEDWVRNPADLRDGVITGLLAASDGPDAAVTEGEVIVWTLGMIIT  
GYETTGSLISTSLYEAIRRPPHERPKTDEDITAWIEETLRVHPPFPHTW  
RFPLEDIELGGYLIPKGAPVQVSI AAANRKPGE GADSFDAERRGHGHL SF  
GLGMHYCIGAPLVRLEAQIAVRGFLRRFPQARLSAETAVQWESEWMIRRM  
SVLPAVLS

>CYP1005A1 (2519838307) *Salinispora arenicola* CNS673

VSAVLFRSWTKTAGTRWPDVTRVADQSGTEHLVVTRHALVRQVLTQATY  
RPDNAL EAVTPIPVAAALRVLAGHRFRLPPTLANNGGVSHPAIRALVADAL  
HPTKVAAQRPWLTGLVADRVASIRTTLD SGGPVDLYADLTADLPLLVLAR  
LVELPDAPVNAV KQFARA ALELFWAPLDADRQLALADEVGRFHQVLR EFA  
DTGGGLAAALRATGHSPDVLVGALFFLLVAGQETTSQFLTLLHRLSGEP  
TIRAALRAGSSSVADVVEEGLRLEPPIV TWRRVA AVDSTLGGTTVAAGTS  
VLLWLARAGRDP AVVAAPDEF RFGQRGSRRLAFA GAGAHRC LGDQLARME  
AAVVVEQATPLLDGVTVVRPPWYPDNL TFRMPDAFVVRR

>CYP105W2 (2519838493) *Salinispora arenicola* CNS673

MTGYQDRPTGDQPGAPVPSGSTDPGIGAFPLPRRCPFSPPAEYARLRAEH  
PVVRLPMLGGDTAWVVS RHADVRQVLS DPRMSADRRRPGFPKFAPTTEGQ  
RQASFANFRPPLNWLDPPEHAICRRQIVDEF SVRRVRQSRALVERVVDTH  
LDALTAAPGADLVSTFAYPVPSQV ICEVLGVPYGEHEFFERRSTLMFRR  
STPADERARCAREIRDFLDMVVT DKEHRPGDDVLSRLLYRQRRAGGVDHE  
AVVSMAFVLLVAGHVTTSNMLALS V LALLTHPARLARLRAE PERFPAAVE  
ELLRYFTVVEAATARTTTAEVTIGGV TIAAGEGVVALGQAANRDP RVFEH  
PDEFDPDRDARAH LAFGHGRHICPGQH LARLEMEVALSRLFRRLPGLKLT  
MEVSDLPLKEDSNIFGLYALPVAW

>CYP248A2 (2519838501) *Salinispora arenicola* CNS673

VLADAVTAFDPTAVDVRRDPYPSYHWLLRHDPVHRGAHQVWYVS RFADVR  
AVLGDERFARTGIRRFWTDLVGPGLLSQIVGDIILFQDEPDHGRLRGVVG  
PAFSPSALRRLEPTIEATVNDLLRPARALGAMDVVADLAYPLALRAVLEL  
LGLPAGDANAVGRWSRAVGRTLDRGATAEDMRRGHAAITEFADYVERALA  
ERREDGADLLALMLAAHRSQ LMSRNEIVSTVVT FIFTGHETVASQLGNGL  
LSLLDHPEQMELMRRQPHLVPQAVEECLRFDP AVQSNTRQLAADVELHGR  
RLRRDDVVVVLAGAANRDPGRYDRPDELDIRRDVPV SMSFGAGMRYCLGS  
YLARLQLRTALGAMVALPDLRLVCSPNELAYQPRTMFRGLTRLPVAFTPA  
G

>CYP107FS2 (2519838561) *Salinispora arenicola* CNS673

MPVPQGEQNLTTTEVFADPKALFATLGS RQPLHRISLPDGMPAVLVTGNRE  
ARQALSDPRLVRSITAAAPELHKYHPLASDDYALSRHMLFADPPDHGRMR  
KL VSTAFTRRRVEQMRPRIQQITDDLIDVIAAKGEADLVETLALPLPIAV  
ISEMLGVPFADRSEFERHAEVLTGINASSGFDAIIAAGRWFDEYLAELVQ  
QRRREPQDDLISGMLAAQDKGDR L TDVELRSNALLLSAGFETT VNLVAN  
GLLALLRHPEAMAALRSEPNLMTTAVDELLRYDSPVSCVTYHFAQEPVEI  
GGFEIRSGEHVVIAAAAANHDPTVFADPSRLDLRREGSGQILSFSGIHF  
CLGAPLARLEGEIAFGTVLRRLAGRLAVPTDSL VWKASFVLHRLERLPV



TFTPDRAPNPIDSVHTV

>CYP105CN1 (2519838562) *Salinispora arenicola* CNS673

MAAPAPQATQSTTPHPPSYPLPRECPYRPSAGTARLRDAGPVSTVRLYDG  
RTAWLVTGAAEARALLADSRVSNRADFPNYPVMDERHLSMRATREMAREE  
EGGFAAALFGMDPFEHTRQRQQLLPRFTVRQVAARRPAIQRIVDEHLDAM  
EANGSPADLVSAFATPVPTMVVCTHLGVFPYQDRTRFEPVAVAGLFEPDRAD  
AAMAELTAYLHQLIETKQSEPGDGVIDHLIANHLRPDAIDRAELVAIASA  
ILVAGTVTTSSAIALGTLALLTAPGQYAALVDNPDLPVGAVNEILRYLSL  
VEQLARVATEDIEIGGKLIRAGDGIIVSFAAGNLDPNVTTHPDRLDVALP  
PTNHLAFSHGIIHHCIGQNLALLELDIAFRALVSRFPTLRLAVPAEQLPY  
FAGDVPRLACLPTW

>CYP105CP2 (2519838564) *Salinispora arenicola* CNS673

MTKSMPVQDLPAFPIPRECPYRPSAQHVSLRSGGPMKVRLYNGRTAWLV  
TDSAHAARAVLSYRRVSIKPYHGNYPLLNEEFKVVDSGYADVLFGVDPP  
EHTRQRQMIMPSFTLRRTAVLRPDIQRIVDDKLDMMRHGAPGDLVTEFA  
QPVPSPMVSFLLGVFWEDHEEFETPAHKLFPVPELAEAEATTELGTYLRLI  
QKKEQPGGTPGGTGLLDDLRDHLRAGALSDELVHIAMAMLVAGTDTT  
NVISLGLTALLDNPQWAALRDNPDDELIPGAVEEILRYTSLIEAFARVAV  
SDIELNGAVIKEGEGILISSAGVNFDPALAPDPGRFDIRRPPRPSFSFSH  
GIHRCPGDNLARLELEIAFRSLVTRMPNLRKAPIDQIPSNNDGTLQRL  
YELPVVW

>CYP211B2 (2519839079) *Salinispora arenicola* CNS673

MDVSEAI AVLISPSGRLDPYPTYEQ LRAHG PVSRTTAGLFVVTGYAEADM  
VLRDPRFVVLDDDLRDDVFPHWQDSPAIXIARSMLRTNPPDHSRIRRLA  
AGAFTPRRVAAMREVVTQADELVDLMIRAGRDGARVDFMDMFAYPLPVA  
VICALLGVPAADRSRFRRWAGDLTGILEPEITPEELAGADAGADELRDYF  
TGLIEQRRRAPADDLTALVQAHDADGDRLSGEELLANLVVLLVAGFETT  
TNLLGNGLVVLTRPEAAAAALRDEPD LAPGYVDELLRYDSPVQLTTRTVR  
ESVSFAGTELPAWSLLVLLGAANRDPRRFPDPARFDPGRAQSQPLSFGA  
GPHYCLGAGLARLEAQVAFPLLLRRLPELALAGRPSRRTRTLRGYETLP  
ITVGAVTADRGTAGVAPGTP

>CYP1051A1 (2519839324) *Salinispora arenicola* CNS673

MATDAAITRARTVPAWKALPAAVRDTHRAFVDVGNWSDGDVVRVSLGVSR  
PYLVTPAHVQEV LHERAAIYPRGDDTALWRSVRKLVGDGILAEGDAAWAA  
SRRVLAPMFRPARINAMVDTMADAIAGAVDDLHGAATAGTPIDVGRELSR  
IVCSAIMRVFFADRITVRDALRIMKAQETIVTAMAPRILAPLVPWWIPMP  
GDRRFRAAVRSIDDILLPVLRQAQRQPDDGDDLLSRLVRARADDGRALSE  
KRMRDDLVSMVAVTTETSTVVLTLWLPLLANHPDVANRLYDEIDRVVGGG  
PVRGDHLAELTYTRMVLDELLRLYPAGWILPRRAATTDVLGGVRINKGAT  
VILSPYVTQRMATAWWGPAAEAFDPERFAAGREAADGRHRYAYYPFGVGMH  
RCLGEHLFNLEAILIVATLLSRFRFALTDTSMPGVKVAASRTPARTVEMI  
LKPVPVPPAR

>CYP105G5 (2519839348) *Salinispora arenicola* CNS673

LTIETTETPPADDSLAPLPRQFMQRDDPSKLPPALAAAEQSPVGRSTL  
PDGDPFWMVSGYDEARAVLSDFRFSDFRYHPRFKKLSGQLGERLRNDK  
ARAGSFINMDPFEHTRYRKLLTGQFTVRRMRQLTVRIEQIVTEQVDVMLA  
EGNSADLVSAFAVPVPSLMICELLGVRYEDRTEFQRRRAAGLLQTDLPKIQ

AVENLEAQRAFMQRLVTDKRRTPADDMISGLVHHAGAEPPLTDDDELVGIA  
TLLLFAGLDTTASMLGLGMFMLLQRPQMAVLRDDPSRIGDAVEELLRYL  
TVVSTGLFRFAKEDVVLGDEHYPAGSTVVVSLMAANRDGRHWPEPETLDV  
TRVRSSHLAFGHGVHQCLGQQARIELTVGITELLRRLPNVRLAVPPADV  
PLRNDMITYGVRHLPILWDTF

>CYP107Q4 (2519839349) *Salinispora arenicola* CNS673

MTTTAETSATIDLFSPEVVADPFGWYARLREETGPTTGTNLNIGTMMGGP  
EMWLVTTRYEDVRQVLTDPRLTNPPADSPLEDIRAGVFKRLDFPPDLIPW  
MANLLNVSDGEDHTRLRKLVSALTAHRIGKLRPRVEKITADLLDKLAED  
GKDGSPVDLVEEYCYPLPVTVICELVGIDEPDRPHWRWAGDSMATMNGER  
IPTTLVKCIELARELIAKRAEPQDDLVLTALVQAQAEQDNRVSDDEIIGI  
LFSLVTAGHQTTTYLIGNSVILLLENPDQLARLKENPSMWPQAVRELQRL  
GPIQFAQPRFPSEDIELGGVTIPRGAPVAPLLLAANTDPRRFPDPNKLI  
DRLAVGSEHGLGFGKGIHRCGLGQHLAYQEAEEVALQGLFTRFPDLSLAVPR  
EEIPWILRPGFTRTRTLPLKLV

>CYP105AB8 (2519839587) *Salinispora arenicola* CNS673

MTETASSRLTDTEFPVQRECPFAEPVEYEQIREQSSIAMVRLTGGGEAWW  
ISGHEQGRAVLADRRFSSDRKANFPFVSTDPAIRKRLHAQPLSLISMDG  
AEHTQARRALIGEFTVRRLAALRPRIQQIVDQCIDEMLTDDQHRADLVKT  
LSLPVPSLVICELLGVPPYADHDFEQEHTATLVRRNTASEVRQHSIDELNA  
YLGALIDRKLASPDDDLGRQIARQHRDGTFRSSMVSLAFLLLVAGHET  
TANMISLGVVGLLQHPEQLAMIKDDDPDKTPLAIEELLRFFITIVDSVTSRV  
ATEDVRLGDTTINAGDGVVVSGLSADWDPTVFADPDRLDLERGARHHLAF  
GFGPHQCLGQNLARLELQIVFDTLFHRIPTLRLAAPLDKIPFKTDAAIYG  
ARELPVAV

>CYP105J3 (2519840085) *Salinispora arenicola* CNS673

MTDSVAFPPQGRVCPHQAPAGYRPLAVQRPLAQVTLYDGRRVWAVTTRDLA  
RRLLVGPRISSDRNTNPAWPAIVPIVAAAVNDAQQKVLKIATALVGTGPE  
HKAQRKMLIPSFTFRMNALRPMIQEIVDQQLDDEMIKSGAPTDLIPAFAS  
AVPVTVLYRLMGIPDDDHGIFEKLSHQLLAGPNANEAYDQLMGYMSRLIA  
ERRRNPGEGLVDDLQAQHGANDDADHDELVSTLVVQVAGNHGTTGSMIAL  
GLFALLQHPEQLAELRADPSLMPTAVDELLRFLSVPDVAVTRLAADDIEVE  
GTIIRKGDGVFFITSLINRDTDVHDAPNSLGWHHASAADHLTFGFGAHQC  
LGQSLARITMEIALGALIDRLPSLRLAVPAEEVPFLPAASLQVIAELPIT  
W

>CYP105CH1 (2519840209) *Salinispora arenicola* CNS673

VSSLPLPTYPKLRDPADPLLPAPAEYLAIQSEKPIAKVLLPSGRPTWLITG  
HALARQVLTEPCVSVDRRHPNFPYPVPNPDAVVAQVARWTYILLGDDPPL  
HTERRRLLISEFTVRQAQAMRPRIQQLVDFHLEQLIAAGPGADFSKHFAM  
KVPSAVICEMLGVPFADHDYFQERTALQLRRDVPVAAQKQAIDELLAYFE  
QLIQEKSSHPGDDVLSRLIVSNRETEAFDHEALVALGLLLLLVGGHETTAN  
TLTLATATMLERPEIAEQLRTPSLMPSAVEEFFLYFVSVAVAVSRIATAD  
LQVGGQLVRAGESMLLVNLTARDGTVFPEPHRLDIRRNARNHLAFSHGI  
HQCMGQNLARVEMQIALDTVLRLPLGLHLVAPFEELPFKYRHLVWGIEEL  
RVAV

>CYP166A4 (2519840259) *Salinispora arenicola* CNS673

MTDAISFELPWARTDKFDPPAVFDALREQRPLARMRYPDGHVGVIVSSYE  
LVREVLGDPRFSHSCAVGHFPVTHQGQVIPTHPQIPGMFIHMDPPEHTRY  
RRLLTGEFTVRRSRLTGHVEGVATEQIEVMRGGHAPADLVATFARPLVL  
RVLSGLVGLPYGERDRYLHAVTLLHDAEADPAEAAAAAYEQAGAYFDEVIE  
RRRRQPEDDLISTLVGGGELTGEELRNIVTLLLFAGYETTESALAVGMFA  
LLHHEDQLARLRADPTKIDAAIEELLRYLTVNQYHTYRTASEDIELHGEV  
INKGDSVTVSLPAANRDPARFACPAELDIDRETSGHVAFGFGIHCCLGQN  
LARVELRAGLSALLRAFPNRLRLAVPADEVPLRLQGSVFAVKNLPVCW

>CYP107EU1 (2519840512) *Salinispora arenicola* CNS673

VTIGQTLPLDVYSPEFTRDPYAI FARLREQAPVCRVTTHRGMSAWMVTRH  
ADVRALLADNRLAKDGNRIGELMPRHSTLTGAATGFPPGLTNNMVNSDPP  
DHTRLRHLVGREFTGHRVEGLRPRIEEIVDDLLDGVAACGDEADLAETLA  
RRLPIAVIGELLGVPEADRAEFFRWADTLYGGTASPEALGQAYNAIVDYL  
GRLCDAKRDPADDLLTALVQVSADEDRLSREELVSMALLLLVAGHETTS  
KQISNGVLALLLNPEQLKLLKAQPARTAGAVEELLRFEGPSLSASLRFTT  
EPVEVAGVVIPEGEFVLLSLASGNRDPEKFPDPDRLDITRSTQGNLAMGH  
GIHHCVGAALARLELEIVLSRLVARFPQMQLAVEADDLEWLNVNSFFRAPL  
HLPVSLRR

>CYP1198B1 (2519841286) *Salinispora arenicola* CNS673

MSGELTDQRTAPGAGGNPLRSLMDHGIRANPYPLFGELREAGPTAVEDGS  
VVLFGEYEHCSQILRHRDMGSDTSEAPSIKGFVVDDAERAGSSIFFMDQP  
GHGRQRKLVSKSFTPRIVKSFGPQITHIVDGLFEDFRDKGELDVVTDLAY  
PVSIGIICDLFGIPDDERDMLKEWSDDLALSTELPTLGAAIGVLNVFTRD  
EINRFGSVAMAAHAYFADLIHRRRNKPNGDDLVSLLATESNGERLTRFEV  
TSVLATLFVAAHESTTNLISGGILALLRNQDQMAVLRENPGITNVVDES  
LRYDPPVHLAARMARARTTIGGYDLDPGTIVVVLMAAGNRDPRAYENPDV  
FDVNRKIRNVSLAFGAGAHFCIGSGLAKLEAEIAISAFQRLKHPEVDES  
SLEYRRHIVVRGLEHMKVSFQP

>CYP1278B4 (2517380076) *Salinispora pacifica* DSM 45548

MPSPVGAVVHPNPYPYAAAMVAERPFFHFDEQLDTWVAASAAAAQAVLTAP  
GCRVRPPHEPVPQGIGTGPAGDVFGNLVRMTDGEPOHRLKAIVTQTLGAV  
DRSTVAATAMRHARQVLNDSVRTPYEQLMFELPAQVVATLCGLDPAAGGE  
ATRLVGHFVQCIPATASPEQQQRAARAAAGLQELLGSKLDDTQHGLLGDL  
VRMATHVGTWDQAPLLANGVGFLSQTYDATAALMGNTLLALSQQECELP  
SEMALQRFVREVIRHDAPIQNTRRFTATPIRHGDVEVPAGQAVLVLLAAA  
NRDPAANPDPHMFRADRTAPNVFTFSAGAHHCGETLAVTIVTTVVEQLL  
RVGFDPAKLSTQVSYPSPNARIPVLT

>CYP107AW9 (2517380421) *Salinispora pacifica* DSM 45548

METVTGTSAPPPVPYIADPYPTLARIRANGPVSIHLSDEGLPMWVIARYQ  
DVRAALADPRFGQDSRRQAALADNRVAGVTLGGDIVHMLNSDPPDHTRLR  
RHVQGAFTARRVAAMRPLVERITTSLLDGLAGRTTVDLVQDFAFPLPMLV  
ICELLGFPAEERNVYRSWSTAILTHDDDPATAFATALREMTDYIAVQLRIR  
QTRPGDDLLELLAARDAGQLTDDEIIGMVFLLLIGGHETTNNLLGTATL  
ALMRNPDQHRWLLANQPALPEAIDEFLRYESPAMATLRFTTTTPVAVDDV  
VIPAGELVLVSLGGANRDPDRFPDADRLILNRHDTGHFAFGHGLHRCLGA  
LLGKLEGEVALGALLRRYPRLALAAEVRQLRWRDTIMLRGLESPLVSLHG

>CYP107AX11 (2517380433) *Salinispora pacifica* DSM 45548

MTSPAPVFDQLLLRDPHRRYNALRDEAPVHHIRTPDGAPAWLVTRYDDV  
RAAFTDPRLSVDKRLSSTDGEHGSSLPPELDAHLLNRDPDPHTRLRRFAA  
AAFTPRRVADLRPAVERIVSTLLDGLAGNDHAELIGSLASPLPLQVMQEL  
LGLPTQTSVDFRTWTNTLLSADANQPAQSRSAMASMRFLIEQLAHKRAR  
PGDDLLTGLLAPHADGDRLSDELVAMLFLLMFAGYDNTAALIGNVAHAL  
LTNAELAEAVRTGSLAVDELVDGVLRWNPSPFLAVRRFAREFVPTIAGQLI  
PAGDRIWLCLASANRDPAQFTEPDTLGTGMRCPHLSFGHGIHYCLGAPL  
ARLQTTVAITSLLDRFPGIRLAVPAQDIRWRESFRLRGLVALPVFLSDGC  
GSGGTYG

>CYP211C4 (2517380642) *Salinispora pacifica* DSM 45548

MPDIEGLLTRLYSAPGRQDPYPVYADLHAQAAIAALAPRPERQRVAAVAV  
GYDLVAAVLRDPEWGKQPPPGWTDQEILRTLQSSMMFINPPDHGRMRHVF  
AGTFTPRRLGALAPVINRVTDDELDRMADAGPGEVDFVTEFAYPLPARVM  
AEFIGIPATELTWYRERVDRIDAFLDVAGKTPERLAAANAAGAELEAFYR  
ELLVHRRRMPGEDLISGLVEAVDAGGVELTEEEELISNLIVLFNASFVTTV  
YLLSNGLPVLLAEPEVAAALADDPETAGAVDEILRLQTPVHLLARAAPR  
DTVLGGVSIPQGGQNVLLLIAAAANRDPAHFPDPDRFDPRRSGPPSLAFGLG  
LHYCLGAAVSRLEGRALPRLLSRFPRLRILEQPVYSGSLFLRGIDRLSV  
SPGGRSIRE

>CYP125A66 (2517380770) *Salinispora pacifica* DSM 45548

MTEPRIPKGFDFTDPAVLERRVPREEFAELRRTPVWVNAQPKGSAGFDD  
DGYWVVTRYADVMAVSRDSEYSTRENTAIAARFQPGTTQADREMQRVIMI  
NVDPPPEHTKLRAIVSRGFTPRAINALRGSLAERAERIVRDAAAARDTGDFV  
TDVACELPLQAI AELIGVPQHRRKVFWDWSNQLIGYDDPAYGVDPMAASA  
ELLAYAMEMAHERQRNPSDDLVTQLVNAQIDGEHLTADEF GFFVMLLAVA  
GNETTRNAITHGMLAFLENPEQWELFKAERPRSAVEEII RWATPVNVFQR  
TALVDTTLAQAI SAGQVALFYGSANFDES VFEEPERFDITRSPNPHLG  
FGGSGVHFCLGANLARLEIELIFNSIADHMPDIRQLADPQRLRSGWINGI  
REL PVQYH

>CYP107AY10 (2517382711) *Salinispora pacifica* DSM 45548

MYQDQPTRAQLAPI PRSGALLGQEYDQLRKTDGVHQVLLPDTSMWLVT  
PELVSRALADPRLALNRKHSRGWSGFALPPALDANLLNLDAPDHTRLRR  
LVGPAFSPQRVAALRPRVQRTAEELADTVLATGSPVDLVTGYCTPLSVQV  
IADLLGVPEAGRTDLRAWTDMLTSYPPDRDAIRRAVVELHGYYVNLIDA  
KQQRPGDDL SALVATEQE GDRLTRDELTSALFLILFAGYENTANLIAS  
TLRLLDHGSRLRGVQASEAVEETLRLEPPAPAAVRRFPTEEMTIGGATIPA  
GDTVLLSIAAATRGADGNSARLAFGNGPHFCLGAALARVEAEAAITVLAR  
RLPSLALAVPGAPVRWRPTFRTHGPAELLVTW

>CYP1223A5 (2517383474) *Salinispora pacifica* DSM 45548

MREVGRAVQALFGPAGCAEPYPHYEALRRAAPVCPLPDNIVLVSRYAEAE  
RVIRDPRFLMEDAAWIGQSHPGWTEHPSFRSLMLEMVNHNPPDHARLRL  
VSRAFTPRRVAELEPVEQLIDDLLDQMAAREGGTADFMADFALPLPVT  
IGELLGIPPADRIWFAPRVEAFTDAIEESMRGPSLAEADQAVKELWARLG  
ELADERRRNPRNDMVSELVSVSDSGDDRLSHDELLANLVLLYAAGYETTS  
NLLGNGLAALLERPALKERLRQNPTQASAFVEEMLRFDPPIQIATRYTAQ  
ATTLGGLNIDAGTQIIVLIGSANRDPDRFADPDEFDPDRADGGSMVFGVG  
AHYCLGAALARMEAEIAFPRLLDRFPAITGHAPGVRRRKSRLRGFTQLPIS

LS

>CYP105AB33 (2517384161) *Salinispora pacifica* DSM 45548

MTETASITTAGASSTATSGPGSGEVTDAEFPVERGCPFSTPAEYEQIREH  
APLAKVRLTTGREAWWIAGHELARAVLADRRFSSDRRDNFPPVSTDPET  
RKQLQDQPI SMLGMDGAEHAQARRALMGFTVRRMAGLRPRIQQIVDQHI  
DEMLSSEQRSADLVEALSLPVPSLVICELLGVYPYADHDFQAHGTGPLVRH  
NTPSQVRVRIQEELNTYLGGLIDRKVADPTDDLRSRQIAKQRAAGTFDRT  
SMVSMAFLLLIAGHETTANMISLGVVGLLQHPDQLAKIKEDPEKTPPAVE  
ELLRYFSITDVTARVATEDVQLGDTTINAGDGVVISGLAADHDPTVFTD  
PTRIDLERGARRHHVAFGFGPHQCIGQTLARLELQIVFDTLFRRIPTLRLA  
APLDDIPFKSDAIIYGAEELPVAW

>CYP211C7 (2525885236) *Salinispora pacifica* CNS237

VPDVEGLLARLYSVQGRQDPYPVYADLHAQGAIAALAPRPERQRVAAVAV  
GYDLVASVLRDPEWFKQPPLDWTEQEILRTLQSSMMFINPPDHGRMRHVF  
AGTFTPRRLGALEPVINRVTDDELLDRMADAGPGEVDFVAEFAYPLPARVM  
AEFIGIPATELAWYRERVDRIDAFLDVAGKTPERLAAANVAGAELEAFY  
ELLAYRRRTPEGDLISGLAQAI DAGGVELTEDELISNLIVLFNASFVTTV  
YLLSNGLPVLLAHPEVATAVADDPELAAGAVDEILRLQTPVHLLARAAPR  
DTVLGGSVIPQGGNVLLIIAAANRDPAHFPDPDRFDPRRSGPSSLAFGLG  
LHYCLGAASVSRLEGRLLPRLLSRFPRLRILEQPVYSGSLFLRGIDKLSV  
SPGGREHP

>CYP125A15 (2525885375) *Salinispora pacifica* CNS237

MTEPRIPVGFDFTDPAVLERRVPREEFAELRRTAPVWWNVQPRGSAGFDD  
DGYWVVTRYADVMAVSRDSEYSTRENTAIARFQPGTTKADLEMQRVIML  
NVDPPPEHTKLRAIVSRGFTPRAINALRGSLAERAHIVRDAAGRGTGDFV  
TDVACELPLQAI AELIGVPQHHRKVFWDWSNQLIGYDDPAYGVDPLTAAA  
ELLAYAMEMADERQRNPSDDLVTCLVNAQIDGHELTDEFGFFVMLLAVA  
GNETTRNAITHGMLAFLEHPEQWELFKAERPRSAVEEII RWATPVNVFQR  
TALVDTTLGGQAI SAGQRFALFYGSANFDES VF AE PERFDITRSPNPHLG  
FGGSGAHFCLGANLARLEIELIFNAIADHMPDIRKAAEPQRLRSGWINGI  
REMPVRYR

>CYP285D2 (2525885465) *Salinispora pacifica* CNS237

MSVSNETVDVRLAEVNLFDPAFHTGDPHPLWRVMRERAPLHRQVLADGR  
MFWNVTRYHDVCRVLGNHRQFTSERGSLISQLGTVDAAAGRMLVSTDPPR  
HLQLRRPLASLFAQPAAEALRGRIQHGVRLINAAPVDESWDLAVDVQQL  
PMVAAAAMVDLPESDWPDLIRWTGMAAAPSDPAFSVGSTATTLAIAHHEL  
FDYFAGQVRDRREHPGDDVISHLLSMHAGDGPLTREEVIFNCYSILLGAN  
ATTPHTVSGTVLALVERPGLLGELTGHPEAAATELVEEGLRWTSAASSFMR  
HAVVDTELSGGVVVRAGDAVAWVGAANRDPVFPDPERFDPARRNNRHVA  
FGHGHPHYCLGAVLARVTLRGFFAEFLQTFVSVQLAGQPQRLASNFIAGLT  
HLPLSVRRRA

>CYP245A12 (2525885547) *Salinispora pacifica* CNS237

MPSATLPRFTLTGWAREDIINPYPVYQRYREVAAVHRGDASGDTPETFYV  
FSYDEVAQVLSSSCFGRGRSLPAAAAASVPVPTDQKALRAIVENWLVFMDP  
PRHTELRSLLNRSFSPRIVTGLRPRIARIAQELLTRLGQQVEADLVEGFA

APLPILVIAELLGIPAERHGWLRANAMALQEASSSRARQDVDGYARAEAA  
AQEFTEYFREEVCLRRGSAGDDLMTILANAQLRGAPVGLAEAVVGTVCVHLL  
TAGHETTTNSLAKAVLALRAHPAALEELQSADGLTADSVAEFLRYDPPVQ  
AVTRWTHQDTTGLGDWDVPRGSRVVALLGSRNDRPARFPLPDALDVRRTAD  
RHLGFGGLGIHYCLGATLARAELEIGLQTLLEDGLPALGYSAYQYVDYADDMV  
FHGPSRLILVNPGERFC

>CYP244A5 (2525885551) *Salinispora pacifica* CNS237

MSATTNAELGEAPETSMPVDPGLFDCLPDLIAAARIAPVVRIPYLGRRHAW  
VVCDELVKQALTHPKMGKDITLVPEWMRQPGMLVTAQPPPEYARAMIMS  
DGENHARIRRIHAPVLSRPNTERWGEQVADKVEGFLDELSHAASGSNAEV  
DVVTNYTHKIPLAFISEMLGLPPEAEHRLRSITDIMLYSSDYAARREAIG  
GLFGAVEEWVRNPAGLRDGVITGLLAASDGPGAAVTEGEVIVWTLGMIIT  
GYETTGSLISTSLYEALRRPPHERPNTDEDITAWIEETLRVHPPFPHTW  
RFPLEDIELGGYLIPKGAQVQVSIAAANRKPGEAGDSFDAERRGHGHLSE  
GLGMHYCIGAPLVRLEAKIAVRGFLRRFPRLRSADTAVQWESEWMIRRM  
SLLPAVLS

>CYP163B17 (2525885770) *Salinispora pacifica* CNS237

LTHAVDLADPATFADHDLTNFWQRLRDEEPIYWNPPKDGRRGFWVLSRHA  
DILEVYRDDVITYTSEGRNVLVTLTAGGDAGAGRLAVTDGPRHAELRKLL  
LRALGPRVLGPVCSAVRNNTRQMIAEAAVNGECDATDIASRIPMITISN  
LLGVPEADRAFLTLTKTALSADDESSETESSEMARSEILLYFQDLVEFR  
RKNPGEDVVSMLVGSSIDGVPLSDDDVVLNCSLIIGGETSRLTMIDSI  
HTLAAYPEQWRRLKSGQCNIDTAVDEVLRWASPSMHFGRTAVREADIHGE  
RIRVDDIVTLWHASGNRDERAFSQPEVFDLGRAPNRHISFGHGPHYCIGS  
YLAKVEISELLMALRDLIQGFVEVIGEPQIRSNLLTGFTMPVRFVSA

>CYP1005A7 (2525885971) *Salinispora pacifica* CNS237

VSAVLFRSWTKTAGTHWPAITRVADQQGTEHLVVTEHALVRQVLTQATF  
RPDNALDAVTPIPVAAALRVLAGHRFRLPPTLANNGGVSHPAIRALVADAL  
HPTKVAAQRPWLAGLVAERVAAIRATLDSGGSADLHADLSADLPLLVLAR  
LVELPDAPVSAVKQFARAALFVWAPLDADRQLALADEVGRFHRVLRFA  
DTGGGLAAALRASGHPPDVLVGLFFLLVAGQETTSQFLTLHLHRLAGEP  
TVRAALRDGGVSVPNVVEEGLRLEPPIVTWRRVAAVDSTLGGTAVPAGTS  
VLLWLARAGRDPITVPAPDEFPRPGQRGSRRLAFGAGAHRCIGDQLARME  
AAVVVEQVTPLLDGITVVRAPWYPDNLTFRMPDAFVIRR

>CYP244A8 (2525886265) *Salinispora pacifica* CNS237

MQDTTHTNLAEAPEVTMPIELRPTDCLPELLAAARVAPVVRTPYLDQHAW  
VVCDELVKQALTHPKLGKDVAAHAPDWMRQPGQMTAMPPEYARMMVMS  
DGEHARIRRIHAPVLSRPNRERWSERVAALVDGFLDNLDSTAGAEVNLI  
TDYTHKIPLAFTAEMGLPPGAERRLHDITEVMLYSADHALRQQAVGELF  
EAVQEWVRNPAGLREGVITGLLASSDGPDATVTEGEAIVWTLSLIINGYE  
TTGSLISAALYEALRRPARERPHTDEAIAAWIEETLRVQPPVPHTTWRFA  
LADLDLGGYLIPKGAQVQISLAAANLDPDEDTSFDAQRRGRGHLSFGLG  
AHYCIGAPLARVQTKIALRGFLRRFPQARLSADTAPQWESEWMIRRMVSVL  
PVLLA

>CYP211B18 (2525887398) *Salinispora pacifica* CNS237

MDASEAVALLMSPPGRLDPYPTYEQ LRAHGFPVVP TAAGYFVVTGYTEADT  
VLRSPRFGVMDDEERADVFPHWQDSPAMMSISRSMIRANPPDHSRMRRLA  
AGVFTPRRVAALREVVAQADELIDEMTRAGRGGAPVDFMGSFAYPLPVT  
VICALLGVPAADWAQFRRWASELTGILEPEITPEELAIADAGASGLRDYF  
TELIAERRRTPADDLTALVQAHDADGDRLSGEELLANLVLLLVAGFETT  
TNLLGNGLVVLNQPE SATALREQPELAPRYVDEV LRYDSPVQLTTRTVR  
ESVPLAGVELPAGSWLLVLLGAANRDPARFTDPARFDPGRAQSPPLSFGA  
GVHYCLGAGLARLEAQVAFPLLLRRLPELALAGEPTRRNRLTLRGYETLP  
VTVG AAPADHGT PAGAALGTP

>CYP107NE1 (2525887682) *Salinispora pacifica* CNS237

MTTAGTRLLFDLRDPALQDDRYGYKRV RDVEPVHRSPLGYWVVTGYDEC  
DTVLRSPGVSTDFTD DPQWARVRGGPDSPVVASARRWMLTRGGADHRRLR  
RMVSRALS PAAMARLRPRIRTLVNGMIDAMGEGEADLISGLALPLPVVVV  
CELVGIPLADADRCRQWTNTIADV DPMVTPRMRRRMNEAVPEFSAYIAG  
KLAERRAEPRD DLLSILLEPDAKGDRLSDEDIAAQILVLFNAGHETSVNV  
IGNGMVSL LQNPDQLRLLREHPELIERSFDELSRHNSAVQIMARQTIAPV  
QVGDTTIPAGASVFIVLGA AHHPAKYDPERFDITRTGTSPLIFGSGPH  
YCIAATLGKMEVVIAFEELLRRYSSIELATTELPWYSHFTFLLGLRSLPL  
RLEYAR

>CYP154M18 (2525887786) *Salinispora pacifica* CNS237

MHETCPVLDTAGRDIHGESDRLRERGA AVKVKLPGGVLA WAVTGHS AVKK  
VLLDPNVTKNARAHWPAFINGEIPMDWELISWVAMDNMVTAYGAHLLQLR  
KLSAKAFTPHR VEMMRPRVVALVNQLLDDLAVAGEEVVDLRERFCYPLPA  
LTVADLIGMSEEHRRQQTAKAMMMVDTTVT PAQAQETLAGWRGAMAELIA  
EKRRNPGEDIASDLIAARD DENGAKLTDTELTD TIFAILGAGSETTINFI  
DNAVTALLSHPDQLAMVRSGQISWAEVIEETLRVECP LGSPLPRYAVTDI  
EIEGVTIPKGDPI LVNYAAAGRDPALHGETAGQFDVTRPDKEHISFGRGP  
HYCLGAGIARMVATVGLSTL FERFPDLALAVPKGELQPLPTFIMNGHRAL  
PVRLGVHRRAAVAG

>CYP208A28 (2525887812) *Salinispora pacifica* CNS237

MTVIVDRGGRVPPGPPVTAGLRLL LALGRDRLGMMTSAATEYGDVARLPV  
GPKRLYFFNHPDHAKHVLADNNANYQKGIGLVHARRALGDGLLTS DGELW  
HKQRRVIQPAFLNRRLAQYAGVVGQEATRLAERLATRV DGPVDVLDEMT  
RLTLGVLGRTL LLD AELTGFRGVGESFAAVQDQAMFELETLSAVPTWIPLR  
RQRRFRARRRHLQEVVDALAAERGQEV EGRDDVLSRLILSTRAEADPQLG  
RQRLRNELVTLLLAGHETTASTLGWSLHL LDQHPQLRERVRHEATSVLGG  
RVPVYEDLHQLRYTAMVVQE AIRLYPPVWILTRKARADDEVGGYRVPAGA  
DLLICPYTLHRHPRFWEEPERFDPERFD PAGLTNRPRYAYIPFGAGPRFC  
VGNNLGMLEATLVLA VLLRDLRLEGLPGRAVIPEPMLS LRVRGGLPMTVR  
RAD

>CYP113B6 (2525888489) *Salinispora pacifica* CNS237

MTQTDNAPAPPIDLPKGADAQGLLDWFAYMRKHWPVSWDDSRQAWHVFN  
RDYLTVTNTNPLIFSSDFSPVFPVPPELALLMGPGTIGGIDPPRHGPMRKL  
VSQAFTPRRIAQMEARIETITADILEQVRDQDQIDIAADLAYPLPVTVIA  
DMLGIPNEDHEKFREWVDIILSNEGLEYPNLPDDFTETVGP AIAEWSEFL  
YAQIAEKRARPD DLM SGLLGVEVEGRKLTDEEVVNIVALLL TAGHISSA  
TLLSNLFLVLEQHPEALAAVRADRS LVPGVVEETLRYS PFNCVFRLLAQ  
DTEIFGQPMRKGQMVIAWIASANRDTEMFS DPDTFDIRRESNKHLAFGYG  
IHHCLGAFLARQEAKVFLNKILDEFSEYTIHHDGVEFYDPDQLTARRLPV

DVIRH

>CYP107LA3 (2525888490) *Salinispora pacifica* CNS237

MECPVSAEYSRSYPFSNHTDLTIDPTYGELRSKEPVARVRMPYGEGBNAWL  
VTRHADARKALSDPRLSIAAGAGRDVPRASPRIQEV DGLMGPPEAHARL  
RRLVATAFTPKRIRDIAPRVAGIVDGLVDDLIHADPPADLVRQVASPVPV  
KTICALMGVPTEDQHIFRVFSEVLMSSTRYTDDQVEKAIQDFTEYLGSL  
AQRRANRTEDLIGAMLEARDNDDRLSEDELIMLTGGLLVGGHETTASQIA  
SHIFVLLRERTRYEKLCAQPELIPAAVEELLRVSPMWASVGPTRVATEDL  
ELNGASIRAGDAVIFSLTSANLDEDAFPDAADVLDREP NPHIAFGHGPH  
FCVGASLARLEMQVTIEALVRRLPGLRLAVKEDELEWHQGMII RSLVSLP  
VMW

>CYP107AX12 (2525888997) *Salinispora pacifica* CNS237

MTSQPAVVFDRLHLLRDPHRRYNALREQAPVHYVRTPDGAPAWLVTRYDDV  
RAAFTDPRLSVDKRFSGTDGEHGSSLPPELDAHLLNRDPPDHTRLRLRLAA  
AAFTPRRVADLRPAVERTVSTLLDDL AGNDHAELIGSLASPLPLQVMHRL  
LGLPTQTSVDFTWTNTLLSADADQPAQSR SAMANMRRFLIEQVAHKRAR  
PGDDLTLGLLSVREDDDGLTDELVAMLFLLMFAGYDNTAALIGNVIHAL  
LTNVELAEAVRIGSLAVDEIVDGVLRWNPSFPIAVRRFAREPVTIAGQTI  
PAGDRIWLCLASANRDPTQFTEPDEIGIAGGWRPHVSFGHGIHYCLGAPL  
ARLQTTVAVTSLLD RFPGIRLAVPAHDIRWRESFRVRGLVALPVFL

>CYP107AW4 (2525889006) *Salinispora pacifica* CNS237

METVTGTSAPPPVPYIADPYPTLARLRANGPVSILHSDEGIPMWVIARYQ  
NVRAALADPRFGQDARRAQTLADNRVTGVTLGGDIVHMLNSDPPDHTRLR  
RQVQGAFTARRVAAMRSLVERITTSLLDGLAGRRTVDLVQDFAFPPLPMLV  
ICELLGFPAEERNAYRCWSTAILTHDDDPAA FATALRDMTDYIAAQLRIR  
RNRPGDDLLELLAARDAGQLTDDEIVGMVFLLLIGGHETT VNLIGTATL  
ALLRNPQHRWLLANPHALPEAIDEFLRYESP VAMATLRFTTAPVT FDDV  
VIPAGELVLVSLGGANRDPDRFPDADRLILD RRDTGHLAFGHGLHRCLGA  
FLGKLEGEVALGALLRRYPRLALAAEVRQLRWRDTIMLRGLES LPVSLHG

>CYP105AB26 (2525889318) *Salinispora pacifica* CNS237

MTETASITTPGISSTTTTTRAASGELTDAEFFPVERGCPFFSTPAEYEQIRAH  
SPIAKVRLTNGGEAWWIAGHELGRAILADRRFSSDRRRDNFPFVSTD PET  
RKQFQDQPTSM LGMDGTEHAQARRALMGEFTVRRMAGLRPRIQQIVDQHI  
DAMLSSGQRSADLVEALSLPVPSLVICELLGV PYADHDFQAHSGPLVRH  
TTPPEVLLRIQGE LN TYLGALIDRKVTDPTDDLLSRQIAKQRAAGTFDRA  
SMVSM AFLLLIAGHETTANMISLGVMGLLQHPDQLAI IKDDPEKTPPAVE  
ELLRYFTIADTVTARVATEEVQLGDTTINAGDGVVVSGLAADRDPTVFTD  
PDQLDLERGARHHVAFGFQPHQCIGQTLARMELQIVFDTLFRRIPTLRLA  
APLDDIPFKSDAIVYGAEELPVAW

>CYP113E2 (2525889498) *Salinispora pacifica* CNS237

MAAVPRLTFADGGKRVLPWFRRMRDDQPVWYDQGTSSWNVFRYADIAQIL  
KDPATFSSDPGRSMPPELAEAEGLVAVDPPRHARLRGLISTAFTPRLV  
EQLAPRVRSIGELLLNRAFVDRRVEGEFDIIGDLAYLLPVYVIGELLGLP  
ESDRGYLVRAADEFYAISADDPFDGAYMASMQSTLDELGSYMLDHAERRR



AKPGDDLISALAHAEIDGERLNDREIRNFAILLTLAGHITTTALLGNTLL  
ALGERQDIMLRWRQGVDTAILLEEVLRHRTPFTEVYRFTTTEVTIGNQV  
VPGDQLRLRWIASGNRDERQFADPDFTFVLGRDSKHLGFGGLGIHYCLGASL  
ARMESVVVLGLLAERTTSLVPAVEALSYDAPGIFCLRSLPVSYRRT

>CYP107EP2 (2525889503) *Salinispora pacifica* CNS237

MTTLPDAGLRARMVGYDILEKAAEQGDLYARLLRGPADPYFPVYEQIRAL  
GPLSRSA LGTWVTTDHQIANKVLRDRRFGVRLADGQKVPEFMNFDNSMLG  
LDPPNHARLRKLTTPALNPRMAGRWRDRADQLCARFIDELPTDGSADFDM  
TEFAQKLPVTVIADLVGIPDDLRPRFSRLSRRIAPLLDGVVSFHKVRGVD  
LAIGELTDMFRGI IKLRQENPGDDLISQMLPAIDEGKLTMDLEPLCMFL  
PLAGSETTVNLI GNGVRALLANPDQWMLRADPAGLAAGVVEETLRFDPP  
VQQYRRVAHQEI ELVGEVLPVDGELAILAAAAANRDPVFD DPHRYDITRR  
SAADTLSFSAGIHYCLGAPLARVEAEAAFRAIATRLPDLRVAGEPRRRDS  
FIIHGMLHFP LSAG

>CYP105AH4 (2525889601) *Salinispora pacifica* CNS237

MTLLQAEEKVLNWPFA RTEWGTPPPILAQLRQAPPCAVIIPAGAASELRA  
WLVT RYPDVRQALMDPRLSADELLPGAPVRIQVPQEERPSSFLRMDDPEH  
GRLRGMIASQFTARRVRQLVPAVQRRTD DDLDAFVAGPCPADLHDAFSRK  
LPTLV IASLLGVPDEDSAFFVEKTRVTL SQEDPEVAFAAYREMTDYL GQL  
AARKAKEPQDDLMSQLAVNNLAVGDITLDELVG IARLVLVAGHETTTNQI  
ALNILSLLLD PGLRAQVLADDGRLLPQYIEEAMRYWSISQDGIVRLVTE  
LVLGEVQMRAGDAVVISIPA ANHDPTVFPEPNRIDVTRSPRDHLQWGNP  
HYCQGAPLARLEMVIALRTL FARLPGLRLATDDVPSLFRRGT VFHGIENL  
PVA

## P450-fragments

*Salinispora arenicola* CNX508

>CYP105J3 (2516016178) *Salinispora arenicola* CNX508

MLIPSFTFRMNALRPMIQEIVDQQLDEMIKSGAPTDLIPAFASAVPVT  
LYRLMGIPDDDHGIF EKL SHQLLAGPNANEAYDQLMGYMSRLIAERRRNP  
GEGVLDDLLAQHGANDDADHDELVSTLVVQVAGNHGTTGSMIALGLFALL  
QHPEQLAELRADPSLMPTAVDELLRFLSV PDAVTRLAADDIEVDGTIIRK  
GDGVFFITSLINRDTDVHDAPNSLGWHHSAADHLTFGFGAHQCLGQSLA  
RITMEIALGALIDRLPSLRLAVPAEEVPFLPAASLQVIAELPITW

*Salinispora arenicola* CNH996B

SPECIES1

>CYP107AX-fragment9 (2571110097) *Salinispora arenicola* CNH996B

VTSPPHVVFGHLLRDPHGQYNAPRGQAPVHHIRTPDGALAWLVMCYDDV  
RAALTDPQLSVEKRCSDAHRWGARVVASA

>CYP105J4 (2571112007) *Salinispora arenicola* CNH996B

MTDSVAFPQGRVCPHQ PAPGYRPLAAQRSLAQVTLYDGRRVWAVTTRDLA  
RRLLVDPRISSDRTNPAWPAIVPIVAAAVNDAQQKVLRIATALVGT DGPE

HKAQRRMLIPSFTRRMNALRPMIQEIVDQ

>CYP105J4 (2571112008) *Salinispora arenicola* CNH996B

MIKSGAPTDLIPAFASAVPVTVLYRLMGIPDDDHGIFEKLSHQLLAGPHA  
NEAYDQLIDYMSTLIAERRRNPGEVGLDDLLAQHGANDDVDHDELVSTLV  
VQVAGNHGTTGSMIALGLFALLQHPEQLAELRANPSLMPTAVDELLRFLS  
VPDAVTRLAADDIEVEGTIIRKGDGVFFITSLINRDTDVHDAPNSLGWHH  
ASAADHLTFGFGAHQCLGQSLARITMEIALGALIDRLPSLRLAVPAEEVP  
FLPAASLQVIAELPITW

## SPECIES2

>CYP107AX-fragmnet9 (2562075228) *Salinispora arenicola* CNH996

VTSPPHVVFGHLLRDPHGQYNAPRGQAPVHHIRTPDGALAWLVMCYDDV  
RAALTDPQLSVEKRCSDAHRWGARVVASA

>CYP105J4 (2562078240) *Salinispora arenicola* CNH996

MIKSGAPTDLIPAFASAVPVTVLYRLMGIPDDDHGIFEKLSHQLLAGPHA  
NEAYDQLIDYMSTLIAERRRNPGEVGLDDLLAQHGANDDVDHDELVSTLV  
VQVAGNHGTTGSMIALGLFALLQHPEQLAELRANPSLMPTAVDELLRFLS  
VPDAVTRLAADDIEVEGTIIRKGDGVFFITSLINRDTDVHDAPNSLGWHH  
ASAADHLTFGFGAHQCLGQSLARITMEIALGALIDRLPSLRLAVPAEEVP  
FLPAASLQVIAELPITW

>CYP105J4 (2562078241) *Salinispora arenicola* CNH996

MTDSVAFPQGRVCPHQAPAGYRPLAAQRSLAQVTLYDGRRVWAVTTRDLA  
RRLLVDPRISSDRTNPAWPAIVPIVAAAVNDAQQKVLRIATALVGTGPE  
HKAQRRMLIPSFTRRMNALRPMIQEIVDQ

*Salinispora pacifica* CNT001

>CYP1278B5 (2515995227) *Salinispora pacifica* CNT001

VCMPsRAQQIILNDPVRTPYEQLMFELPAQVVAMLCGLDPAAGGEASRLVG  
RFVQCIPAAASPEQQQRAARAAAGLQELLGPKLDDTQHGLLGDLVRMATQ  
VNWTDRAPLLANGIGFLSQTYDATAALMGNTLLALSQQERERPAGETTLE  
RFVREVIRHDAPVQNTRRFTTTPIRHGAVEVPAGQAILVLLAAANRDPAA  
NPNPHTFRADRTAPTVFTFSSAGAHRRPGEMLAVTVVTTVVEQLLKVGFEF  
ARLSTQVTTYWSPSTRIPVLTDQAGT

*Salinispora arenicola* CNY685

>CYP107AX10 (2563829605) *Salinispora arenicola* CNY685

VTSPPHVVFGHDLRDPGQYSTLRGRAPVHHIRMPDGVPawLVMRYDDV

RAALTDPRLSVDKRFNHTVHRIR

>CYP244A-fragment2 (2563833405) *Salinispora arenicola* CNY685

VHYCIGAPLARLQAQIALRGFLQRFPRARLSADSARQWESERMIRMSVL  
PALLA

>CYP105J-fragment1 (2563834046) *Salinispora arenicola* CNY685

MTDSVTFPQGRVCPHPAPGYRPLAAQRPLAQVTLYDGRRVCAVTTRDLA  
RRLLVDPRISSDRANPAWPTIVPIVAAAVNDAQQKVLRIATALVGTDGPE  
HKAQRKMLIPSFTRRVNALRPVIQEIVDQQLDEMIKSGAPTDLIPARTP  
TRHMTRSWTI

>CYP105J-fragment6 (2563834047) *Salinispora arenicola* CNY685

VQVAGSHGTTGSMIALGLFALLQHPEQLVELRADPSFFITSLINRDTDVH  
DAPNSLGWRHASAADHLTFGFGAHQCLGQSLARITMEIALGARIDRRPDL  
RPAVPAGTLREDR

>CYP285A9 (2563834233) *Salinispora arenicola* CNY685

MKLTKPAEHEPVDLEKADLVDPVHGEKDPHAIWHAMRERDPVHWQQVDE  
RLGYWSATRYEDVARVLRDHRVFTSEHGTLNLLGKKDPASRKQLPATDP  
PRHTKMRSFPVQALNSKVLERHRE

>CYP285A9 (2563834234) *Salinispora arenicola* CNY685

VPDGEEFDFAEMVGKLPMAVTGTLMGLDREDWPQLTYLTSQAIAPDDPEF  
VLPEGGEATLARAHRELFAAFEQSLSRKKGKNGDLIDVLRTEMDNGRK  
LRPGEIVSNSYSLLLGANVTTPHPVNAAMGELAKDGKYADWASHPELFES  
GINEALRWSSPASHFLRYAKTDVELSGVTIRQGEVPAAWIGSANRDATVF  
PDPEYFDIRRDPRNHAFGVGPHYCVGHAVARLALHELFEGLLDQFSGLE  
PAGEPQHLHSNFIAGMKHLPLVATRRAEERNRG

*Salinispora pacifica* DSM 45547

>CYP208A26 (2516639064) *Salinispora pacifica* DSM 45547

MLTSAATKYGDVARLPVGPKRLYFFNHPDHAKHVLADNHANYAKGIGLVH  
ARRALGDGLLTSDGE

*Salinispora arenicola* CNQ884

>CYP107AY2 (2561693306) *Salinispora arenicola* CNQ884

VAVRLAEYPPAPRWARPVSPLPWRDVSAARPSVVRTHQVRPAVYPPDRDA  
IRRAVTELHGYYVDLIDIKQQQPGGDLSTLVTEIQDGDRLSRDELTSLA  
FLILFAGYENTANLIASAVLWLLDHGGLNVVPISEAIEGTLRHEPPAPVA  
IRRFPTEDIIIGGVTPAGDTVLLSVAAATRGADGNAARLAFNGPHYCL  
GAALARVEAEALTVLARLPGLTLAVPPSQVRWRPTFRTHGPAELLVGW

*Salinispora pacifica* CNH732

>CYP1278B2(2571075021) *Salinispora pacifica* CNH732

VLLAAANRDPAAANPNPHTFRADRTAPTFTFSAGAHLCPGEMLAVTVVTT  
VVEQLLKVGFDPARLSTQVTYRPSNPTRIPVLTDQAGT

*Salinispora tropica* CNH898

>CYP107AX5(2515517766) *Salinispora tropica* CNH898

VRAALTDPRLSVDKRFSGTGGEHGSSLPPELDAHLLNRDPPDHTRLRCLA  
ATAFTPRRIAEHQPAASLLDRFPGIRMAAPTHALRWRDSFRVRGLTALPV  
HL

*Salinispora pacifica* CNY498

>CYP1278B3(2563543478) *Salinispora pacifica* CNY498

VCMPsRAQQIILNDPVRTTYEQSMFELPAQVVAMLCGLDPAAGGEASRLVG  
RFVQCIPAAASPEQQQWAARAAAGLQELLGPKLDDTQHGLLGDLVRMATQ  
VNWTDRAPLLANGIGVLSQTYDATAALMGNTRLALSQQEREREPAGETALE  
RFVREVIRHDAPVQNTTRFTTTPIRHGAVEVPAGQAILVLLAAANRDPAA  
NPNPHTFRADRTAPTFTFAAGAHRCPGEMLAVTVVTTVVEQLLKVGFEF  
ASLSTQVTYRPSNPTRIPVLTDQAGT

*Salinispora arenicola* ATCC BAA-917

>CYP107AX14P(2550290938) *Salinispora arenicola* ATCC BAA-917

GQAPVHHIIRTPDGAPAWLVMRYHDVQAALTDLRLSVDKRFSDTDGEHGSS  
LPPELDAHLLNRDPPDHTRLRLRLAAAFTPRRVADQAPAVATIVDALP

>CYP154M20(2550291869) *Salinispora arenicola* ATCC BAA-917

ETKRREPGNDITTLIIKAREDEQAPLTDDEVIGSLHLLIGGGTETTSNVL  
CNTLIDLTLTHPDQMAMIRSGAVGWEEAWEVEVRKDGAVGSMPFRCANADM  
LEPKGFE

>CYP107AX14P(2550292968) *Salinispora arenicola* ATCC BAA-917

LASPLPLQVMHELLGLPTQTSVDFRNWTNTLLSADANQPAQSRSAMATMR  
RFLMGQLARKRAQPGDDLLTGLLAARDDDRFTDDELLAMVFLMFAGYD  
NTAALIGNVTHALLTDAGLHDAVRAGSVDLDSVVDEVLRWNPSFPLAVRR  
FAREPVTSPRQAIASGSAWPARTATPHSSPNPTN

>CYP154M20(2550292975) *Salinispora arenicola* ATCC BAA-917

MERCPYVLDRAGRDHLHGEAKALRARGPVTLEVELHGGYTAVSVTSYEIAKQ  
LLVDPRISK

>CYP107AY2(2550293291) *Salinispora arenicola* ATCC BAA-917

MTAELTPIPRSSARLGQEYDQLRKTGDVHQVLLPDASLAWLVNPEVAAR  
ALADPRLALNRRNSRGGWSGFALPPALDANLLNLDAPDHTRLRRLVGPAF  
SPQRVAALRPGIRRAAEHLLDTLVATSRPTDLVTGYCNPLSVQVIADLMG  
VPE

>CYP125G6 (2550294932) *Salinispora arenicola* ATCC BAA-917

FKPFRFQHPHHARLRKLVTSVFTPRAVRGLLASIDAHAAALVAKVVAAGE  
FDVVTDLAAELPLLVLADLLGVPKQDRALLYGWSNHLVGFDDPDFGGGDI  
DAYRTAMAEAFQYALNLGVERRARPTDDLVSLLANA EVDGTRLTDREFCN  
FWLLLVVAGNETTRHLVAGTMQALTEHPGECARLVEGRVPMESAVEELLR  
WVTPIMQFRRATRDTEIGGQAVTAGEKVVLYYTSANRDATVFAEPDRLD  
LGRTPNRQLSFGIGPHYCLGAHLARAELTALLR

>CYP107EU1 (2550296198) *Salinispora arenicola* ATCC BAA-917

VTIGQTLPLDVYSPEFTRDPYAIFARLREQAPVCRVTTHRGMSAWMVTRH  
ADVRALLADNRLAKDGNRIGELIPAQHAHGCGRVVPARTDDQHGGQ

>CYP154M13 (2550296521) *Salinispora arenicola* ATCC BAA-917

RGDPILINYAALGRDPALHGESAGVFDVTRQHKEHLSFGHGAHYCLGAGI  
ARMVAKTGLSALFERFPRMTLAVSATDLVPYPTFIMNGNRQLPVHLSGAL  
TWREGEQSALGRA

>CYP107FJ2 (2550296637) *Salinispora arenicola* ATCC BAA-917

CADFNVWTKVLTSAGAVDLDRLLTTAAGEMVAYLRGLLDRKRQVPESDLS  
ALVAVRDGADRLSDDELTSMVYLLLTAGYETT VNLIGNGLNLLANPEQL  
VAFKADPDLLPQVVVEAMRFDSVPQIAVRHSTEPVEIAGQAIPSGALILV  
SLLWANRDPDRFTEPEVFRVDRQDNPQLGFGYGFHHCIGAPLARMEGTVA  
IGTVIRRFPALRLAHPASSLTWR

>CYP107AY13 (2550296922) *Salinispora arenicola* ATCC BAA-917

TSYPPDRDAIRQAVTELHGYVVDLIDLKQQQPGEDLLSVLVTTIEQDGDRL  
TRDELTSALFLILFAGYENTANLIASAVLWLLDHGGLNVVPISEAIEATL  
RHEPPAPVAIRRFPTEDI IIGGV TIPAGDTVLLSIAAATRGADGNAARLA  
FGNGPHYCLGAALARIEAEEALTVLAR

>CYP248A2 (2550297290) *Salinispora arenicola* ATCC BAA-917

EDGADLLALMLAAHRSQLMRNEIVSTVVTFIFTGHETVASQLGNGLLSL  
LDHPEQLELVRRQPHLVPA

>CYP1005A1 (2550297912) *Salinispora arenicola* ATCC BAA-917

VSAVLFRSWTKTAGTRWPDVTRVADQSGTEHLVVTRHALVRQVLTDAQTY  
RPDNAL EAVTPVPVAALRVLAGHRFRLPPTLANNGGASHPAIRALVADAL  
HPTKVAAQRPWLTGLVADRVATIRTTLDSSGGPVDLYADLTADLPLLVLAR  
LVELPDAPVNAVQKFARAAL ELFWAPLDADRQLALADEVGRFHQVLRFA  
DTGGGLAAALRATGHSPDVLVGALFFLLVAGQETTSQFLTLLLRVSGEP  
TIRAALRAGSSSVADVVEEGL

>CYP105J3 (2550297980) *Salinispora arenicola* ATCC BAA-917

LAE LRADPSLMPTAVDELLRFLSV PDAVTRLAADDIEVEGTVIRKGDGVF  
FITS LINRDTDVHDAPNSLGWHHSAADHLTFGFGAHQCLGQSLARITME  
IALGALIDRLPSRLAVPAEEVPFLPAASLQVIAELPITW

*Salinispora pacifica* CNS237

>CYP107AY1(2525886283) *Salinispora pacifica* CNS237

MRAEPAPIPRSGARLGQEYDEFKAGDVHQVLLPDSSLAWLVTDPELV TG  
YCTPLSVQVIADLMGVPEAGRTFLRTWTD TMLTGYPDRAAIRRAVVELH  
GYVVNLIGAKQQQPGDDL SALVTIEQDGDRLTRDEL TSLAFLILFAGYE  
NTANLIAS TVLRLLDQGGIREARILEAIEETLRLEPPAPAAVRRFPTEEM  
TIGGATIPAGDTVLLSIAAATRGADGSVTRLA FGNPGPHFCLGAAPQNSWS  
PGDARRLTWWCQLPAGSRR

*Salinispora pacifica* CNT045

>CYP161T1 (2517965967) *Salinispora pacifica* CNT045

VQWHADGPVLGRCWAGVPYANWEQFRRWSDDAADMYDQERSVGGYQALRD  
YIAELAQVRLRMSGTDLISDLMESHRTEPEGFTLNQVVELGLTLLFAGHE  
TTVTAIDNGAVLLATHPEQRDRLADDP SLLDAAVEEILRGSVPRMNFFAR  
PDDTDPAGALPRWANTDLVIGDVTVRAGELVLLGLAHANVDERFFAESAR  
FDVGRVPNRH LTFGNPGPHFCAGAPLARLELQELSVARLERFPGLRLAVPA  
ERLEPRANLLTGGMTRVPVTW

*Salinispora arenicola* CNH964

>CYP107AX6 (2515698830) *Salinispora arenicola* CNH964

VTSPPHVAFGHLLRDPHGQYNALRGQAPVHHIRTPDGAPAWLVMRYDDV  
RAALTDPRLSVDKRFSDTDGEHGSSLPPELDAHLLNRDPPDHTRLRRLAA  
AAFTPRRVADQAPAVATIVDALLDGIADQDQAE LIGALASPLPLQVMHEL  
LGLPTQTSVDFRNWTRCCPPTPTSRPSRVRRWPRCGGFSWGSWPASGHSP  
ATTC

*Salinispora pacifica* CNT403

>CYP161T2 (2561669980) *Salinispora pacifica* CNT403

MDFFARPDDTDPAGALPRRANTDLVIGDVTVRAGELVLLGLAHANVDERF  
FAESARFDVGRVPNRH LTFGNPGPHFCAGAPLARLELQELFVARLERFPGA  
APGGAGGAVGAARQPAHRWHDPCAGDLVAQGGGMSARRRSRSLICARSAT  
VKRSSSSFWAAS TSVSISRIRAVPASVM

*Salinispora pacifica* CNT-133

>CYP107AX6 (2550581057) *Salinispora pacifica* CNT-133

VFDQLLLCDPHRRYNALRDEAPVHHIRTPDGAPAWLVTRYHDRVRAAFTDP

RLSVDKRLSSTDGEHGSSLPPELDAHLLNRDPPDHTRLRRLAAAAFTPRR  
IADLRPAVERIVSTLLDGLAGHDQAELIGSLASPLPLQVMQELLGLPTQT  
SVDFRTWTNTLLSADANQPAQSRSAMANMRRFLVEQLAHKRAQPGDDLTT  
GLLAAREDGDWLTDDDELVAMLFLLMFAGYDNTAALIGNVAHALLTNAELP  
AA

>CYP107AY9 (2550581202) *Salinispora pacifica* CNT-133

RRYPGVMSQDQPMRAELAPIPRSGARLGPEYDQLRKTGDVHQVLLPDTSM  
AWLVTSPELVSRALADPRLALNRKHSRGGWSGFALPPALDANLLNLDAPD  
HTRLRRLVGPAFSPQRVAALRPRI

>CYP244A12 (2550581480) *Salinispora pacifica* CNT-133

SFGLGAHYCIGAPLARVQTKIALRGFLRRFPQARLSADTAPRWESEWMIR  
RMSVLPVLLA

>CYP163B20 (2550582793) *Salinispora pacifica* CNT-133

DLTNFWQRLRDVEPIYWNPPTSGRRGFWVLSRHADILEVYRDDMTFTSER  
GNVLVTLLAGGDAGAGRMLAVTDGPRHTELKLLLRALGPRVLGPVCRAV  
RANTRQMIGEAAANGCEDFATDIASRIPMITISNLLGVPEADRASLLKMT  
KTALSADDESISDTDSEMARNEILLYFQDFVEFRKKNPGEDVVSMLVNSS  
IDGVPLSDDDIVLNC

>CYP211B11 (2550584249) *Salinispora pacifica* CNT-133

DEMIRAGRGGAAVDFMGSFAYPLPVTVICALLGVPTADWARFRHWASDLT  
GVLEPEIITPQELAIADAGASELRDYFTELIQRRRAPADDLTALVQAHD  
ADGDRLSGEELLANLVLLLVAGFETTTNLLGNGLVVLLTHPDSATALRGQ  
PELAPGYVEEFLRYDSPVQLTSRMVRESVSLAGVELPAGSWLLVLLGAAN  
RDPARFTDPARFDPRR

>CYP105AB37 (2550584764) *Salinispora pacifica* CNT-133

QPTSMIGMDGAEHAQARRALMGFTVRRMAGLRPRIQQIVDQHIDEMLSS  
DQRTADLVEALSLPVPVSLVICELLGVVPYADHDFQARSGP

>CYP113B7 (2550585478) *Salinispora pacifica* CNT-133

KGQMVIAWIASANRDTEVFAPDPTFDIRRKSNKHLAFGYGIHHCLGAFLA  
RQEAKVFLNQVLDEFSEFTIDHDGVEFYDPDQLTARRLPVQVVR

>CYP244A12 (2550585594) *Salinispora pacifica* CNT-133

APDWMRQPGQMVMTAMPPEYARMMVMSDGEHHARIRRIHAPVLSPRNTGR  
WSERVAALIAGFLDNLDSADGTEVNLITDYTQKIPLAFTAEMLGPPGVE  
RRLHDITEVMLYSADYALRQHAVGELFEAVQEWVRDPAELRDGVITGLLA  
STDGPDARVTEGEAIVWTLISLIINGYETTGLISAALYEALRRPAPERPH  
TDEAVAAWIEETLRVQPPVPHTTWRFA

>CYP107AX6 (2550585683) *Salinispora pacifica* CNT-133

PLARLQTTVAVTSLDDRFPGIRLAVPAQDIRWRESFRLRGLVALPVFL

>CYP105AB37 (2550586674) *Salinispora pacifica* CNT-133

TPPAVEELLRYFTTIADTVTARVATEDVQLGDTTINAGDGVVISGLAADHD  
PTVFTDPDRLLDLERGARHHVAFGFGPHQCIGQTLARMELQIVFDTLFRRI  
PTLRLAAPLDDIPFKSDAFVYGAERLPVAW

>CYP107AY8 (2550587028) *Salinispora pacifica* CNT-133

VATGSPVDLVTSYCTPLSVQVIADLLGVPEAGRTDLRAWTDMLTSYPPD  
RDAIRQAVVELHGYVVNLIIEAKRQRPGDDLLSALVATEQEGDRLTRDELT  
SLAFLILFAGYENTANLIAS TVLRLLGHGSLRGVRVPEAIEETLRLEPPA  
PAAIRRFPTTEMTIGGATIPAGDTVLLSIAAATRGADGNPARLAFGNNGPH  
FCLGAALARVEAEEAITVLARRLPGLALAVPG

*Salinispora pacifica* CNQ768

>CYP1278B1 (2517950314) *Salinispora pacifica* CNQ768

MPSRAQQIILNDPVRTPYEQLMFELPAQVVAMLCGLDPAAGGEASRLVGRF  
VQCIPATASPEQQQRAARAAAGLQELLGPKLDDTQQGLLGDLVRMATQVN  
WTDRAPLLANGIGFLSQTYDATAALMGNTLLALSQQERERPADETTLERF  
VREVIRHDAPVQNTRRFTATPIRHGDVEVPAGQAILVLLAAANRDPAANP  
NPHTFRADRTAPTFTFSAGAHRCPGEMLA VTVVTTVVEQLLKVGFDPAS  
LSTQVITYRSPNTRIPVLTDQAGT

>CYP107AY2 (2566059486) *Salinispora arenicola* CNS296

VAVRLAEYPTAPRWARPVSPLPWRDVSAARPSVVRTHQVRPAVYPPDRDA  
IRRAVTELHGYVVDLIDIKQQQPGDDLLSALVTIEQDGDRLSRDELTSLA  
FLILFAGYENTANLIASAVLWLLDHGGLNVVPTSEAIEATLRHEPPAPVA  
IRRFPTEDIIIGGV TIPAGDTVLLSVAAATRGADGNAARLAFGNNGPHYCL  
GAALARVEAEEALTVLARRLPGLTLAVPPSQVRWRPTFRTHGPAELLVGW

*Salinispora pacifica* DSM 45549

>CYP107AX2 (2517460095) *Salinispora pacifica* DSM 45549

MACHPLRRRASGIHRPAPLSVDKRFSSSTDGEHGSSLSPKLDAHLNRPDP  
DHTRLRLRLAAAAFTPRRIADLRPAVETTVSTLLDGLAGNDHAELIGSLAS  
PLPLQVMHEPLGLPTQASVDFRTWTNTLLSADANQPAQSCPAMANMRRFL  
IEQVAHKRARPADLLTGLPPACLPAPFGCGWPCLPATYGGGNRSEYADW  
SPCRCSCRRRA

*Salinispora pacifica* CNT851

>CYP107AX3 (2517988085) *Salinispora pacifica* CNT851

MQSRRGRTGPAAPAPNCKVSLETAHSTVTRPTTLDSDVSQRAPSPLADLR



PAMERIVSTLLDGLVGHDQAELIGSLASPLPLQVMQELLGLPTQTSVD  
FRWNTNTLLSADANQPAQSRSAMANMRRFLVEQLAHERARPGDDLLTGLLAA  
REDDDRLTDDDELVAMLFLLMFAGYDNTAALIGNVVHALLTNTELPAAVRT  
GSLALDELVDGVLRWNPSPFLAVRRFAREPITIAGQTIPAGDRVWLCLAS  
ANRDPAQFTAPDKLGTGIRPHLSFGHGIHYCLGAPLARLQTTVAVTIL  
LDRFPGSGWPCRPTTSGGGNRFDYAGWSPYRCSCRATRWRQGGPASPPRP  
ASADAGAGR

*Salinispora arenicola* CNS342

>CYP107AY2 (2571119390) *Salinispora arenicola* CNS342

VAVRLAEYPPAPRWARPVSPLPWRDVSAARPSVVRTHQVRPAVYPPDRDA  
IRRAVTELHGYYVVDLIDIKQQQPGDDLLSTLVTEIQDGDRLSRDELTS  
LAFLILFAGYENTANLIASAVLWLLDHGGLNVVPISEAIEGTLRHEPPAPVA  
IRRFPTEDIIIGGV TIPAGDTVLLSVAAATRGADGNAARLAFGNGPHYCL  
GAALARVEAEEALTVLARRLPGLTLAVPPSQVRWRPTFRTHGPAELLVGW

*Salinispora pacifica* CNT796

>CYP107AX3 (2515984270) *Salinispora pacifica* CNT796

MQSRRGRTGPAAPAPNCKVSLETAHSTVTRPTTLDSDVSQRAPSPLADLR  
PAMERIVSTLLDGLVGHDQAELIGSLASPLPLQVMQELLGLPTQTSVD  
FRWNTNTLLSADANQPAQSRSAMANMRRFLVEQLAHERARPGDDLLTGLLAA  
REDDDRLTDDDELVAMLFLLMFAGYDNTAALIGNVVHALLTNTELPAAVRT  
GSLALDELVDGVLRWNPSPFLAVRRFAREPITIAGQTIPAGDRVWLCLAS  
ANRDPAQFTAPDKLGTGIRPHLSFGHGIHYCLGAPLARLQTTVAVTIL  
LDRFPGSGWPCRPTTSGGGNRFDYAGWSPYRCSCRATRWRQGGPASPPRP  
ASADAGAGR

*Salinispora pacifica* CNR114

>CYP1278B1 (2515965299) *Salinispora pacifica* CNR114

MPSRAQQIILNDPVRTPYEQIMFELPAQVVAMLCGLDPAAGGEASRLVGRF  
VQCIPATASPEQQQRAARAAAGLQELLGPKLDDTQQGLLGDLVRMATQVN  
WTDRAPLLANGIGFLSQTYDATAALMGNTLLALSQQERERPADETTLERF  
VREVIRHDAPVQNTRRFTATPIRHGAVEVPAGQAILVLLAAANRDPAANP  
NPHTFRADRTAPTFTFSAGAHRCPEGMLAVTVVTTTVEQLLKVGFDPAS  
LSTQVTYRPSNPTRIPVLTDQAGT

*Salinispora pacifica* CNS860

>CYP107CL2 (2518511697) *Salinispora pacifica* CNS860

LQITPEFMHDPYPVYVGMRDSAPVRLSDANAGRTWTFVPRYHDVIDVLRDD  
RFSAAALKAPAFINQFPPEQRVQFQPFNQSIAGWVVLQDPPAHRQLRQLMN  
KGFTRHLVAALRPKVTEIATGLVDTMATRRSGDFMTDFAQFPFPAAVIATM  
FGYRPPT

>CYP107CL2 (2518511699) *Salinispora pacifica* CNS860

VISLLVSVRDNGEQLTDEQVLNCAQLIVAGHETTRNLVANGWLWTLSSH  
DQLAKLWADPSLMTSAIREMMRFESPLQFVRRVARDDFDYLGVRIQAQDS  
VVTMLGSANRDPAFFTEPDRFDITRNPTGHVALSYGPHICLGAALAEETET  
EVALGILLERFPDLRAVDEQPERVMNPMLRGGGGDVAGRRVRRQRHRAE  
PGRVNDPVVVVSATDEVLRDPAAGPHLLTGQERARLGSFGSESARRDFIA  
AHLVLRLCAARLLGTGPAQVSFGQFCPGCHATGHGRPLLTDPRDIHLSTS  
HTAGVVAAGHAPVGVDERHGRQSAALMRRVLASAEFALVTEHPDPR  
HAFLPYREREPGGDLSLGDGGGAVTSPEPSGGASGGAVRDHRAQPGDERQ  
HGATDRQGERDPAEVSHHRRVHQHIQRFGGEGHHEGRQGERGNSAR

*Salinispora arenicola* CNY694

>CYP107AX8 (2562130127) *Salinispora arenicola* CNY694

VTSPPHVVFVGHDLRLDPHGQYSTLRGQAPVHHIRMPDGAPAWLVMRYDDV  
RAALTDPRLSVDKRFNHTVHRTR

>CYP244A2 (2562132285) *Salinispora arenicola* CNY694

VHYCIGAPLARLQAQIALRGFLQRFPRARLSADSTHQWESERMIRRMVSL  
PALLA

>CYP105J4 (2562133988) *Salinispora arenicola* CNY694

MDYMSRLIAERRRNPGEGVLDDLLAQHGANDDADHDELVSTLVVQVAGNH  
GTTGSMIALGLFALLQHPEQLAELRADPSFFITSLINRDTDVHDAPNSLG  
WRHASAADHLTFGFGAHQCLGQSLARITMEIALGALIDRRPDLRPAVPAG  
TLREDR

>CYP105J2 (2562133989) *Salinispora arenicola* CNY694

VPIVAAAVNDAQQKVLRIASALVGTGPEHKAQRKMLIPSFTFRRVNALR  
PVIQEIVDQQLDEMIKSGAPTDLIPARTPTRHMTTSWTI

>CYP285A9 (2562134111) *Salinispora arenicola* CNY694

MKLTKEAEHEPVDLEKADLVDPVHGEHGPDAIWHAMRERDPVHWQQVDE  
RLGYWSATRYEDVARVLRDHRVFTSEHGTLNLLGKKDPASRKQLPATDP  
PRHTKTRSPVQRALNSKVLERHREQIREEAQRLLASVPDGEEDFAEMVG  
KLPMAVTGTLMGLDREDWPQLTYLTSQAIAPDDPEFVLPPEGGEATLARA  
RELFAAFEQSLSRKKGKNGDLIDVLRHHGDGQRSQVAAG

>CYP285A9 (2562134112) *Salinispora arenicola* CNY694

MEMDNGRKLRPGEIVSNSYSLLLGANVTTPHVPNAAMGELTKDGKYADWA  
SHPSELFESGINEALRWSSPASHFLRYAKTDVELSGVTIRQGEPAWIGS  
ANRDATVFPDPYEFDIRRDPRNHLAFGVGPHYCVGHAVARLALHELFEGL  
LDQFSGLEPAGEPQHLHSNFIAGMKHLPLVATRRAEERNRG

*Salinispora arenicola* CNP105

>CYP107AX13 (2518447851) *Salinispora arenicola* CNP105

LWTRSCGGIPPFPLAVRRFAREPVTIAGHTIPAGDRVWLCLASANRDPAQ  
FTEPDELGITPARRPHLAFGHGHIHYCLGAPLARLQTTVAVASLLDRYPGI  
RLAVPAHELRRWRESFRVRGLAALPVRL

>CYP107AX6 (2518447852) *Salinispora arenicola* CNP105

VTSPPHVAFGHLLLRDPHGQYNALRGQAPVHHIRTPDGAPAWLVMRYDDV  
RAALTDPRLSVDKRFSDTDGEHGSSLPELDAHLLNRDPPDHTRLRRLAA  
AAFTPRRVADQAPAVATIVDALLDGIADQDQAEILIGALASPLPLQVMHEL  
LGLPTQTSVDFRNWTRCCPPTPTSRPSRVRRWPRCGGFSWGSWPASGHSP  
ATTC

*Salinispora arenicola* CNX482

>CYP107AY2 (2515757970) *Salinispora arenicola* CNX482

VAVRLAEYPPAPRWARPVSPLPWRDVSAARPSVVRTHQVRPAVYPPDRDA  
IRQAVTELHGYYVVDLIDIKQQQPGDDLSSALVTIEQDGDRLSRDELTSIA  
FLILFAGYENTANLIASAVLWLLDHGGLNVVPISEAIEATLRHEPPAPVA  
IRRFPTEDIIIGGLTIPAGDTVLLSIAAATRGADGNAARLAFGSGPHYCL  
GAALARVEAEEALTVLARRLPGLTLAVPPSQVRWRPTFRTHGPAELLVGW

*Salinispora pacifica* CNY646

>CYP107EP2 (2563510406) *Salinispora pacifica* CNY646

MLGLDPPHHARLRKLTIPALNPRMAGRWRDRADQLCARFIDELPTDGSFAF  
DLMTEFAQKLPVTVIADLVGIPDDLPRFRSRLRRRIAPLLDGVVVSFHKVR  
GGGPGDR

*Salinispora arenicola* CNS299

>CYP107AY2 (2524767206) *Salinispora arenicola* CNS299

VAVRLAEYPPAPRWARPVSPLPWRDVSAARPSVVRTHQVRPAVYPPDRDA  
IRRAVTELHGYYVVDLIDIKQQQPGDDLSSALVTIEQDGDRLSRDELTSIA  
FLILFAGYENTANLIASAVLWLLDHGGLNVVPTSEAIEATLRHEPPAPVA  
IRRFPTEDIIIGGVTTIPAGDTVLLSVAAATRGADGNAARLAFGNPHYCL  
GAALARVEAEEALTVLARRLPGLTLAVPPSQVRWRPTFRTHGPAELLVGW

*Salinispora arenicola* CNY281

>CYP105J3 (2562072978) *Salinispora arenicola* CNY281

MTDSVAFPQGRVCPHQAPGYRPLAARRPLAQVTLCDGRRFAVTTTRDLA  
RRLLDVDPRTSSDRNTNPAWAAIVPIVAAAVNDAQQKVLKIATALVGTGPE  
RKAQRRMLIPSFTFRMNALRPMIQEIVDQQSIVFGARPMFAMS

*Salinispora pacifica* CNT003

>CYP1278B5 (2515705793) *Salinispora pacifica* CNT003

MFELPAQVVAMLCGLDPAAGGEASRLVGRFVQCIPAAASPEQQQRAARAA  
AGLQELLGPKLDDTQHGLLGDLVRMATQVNWTDRAPELLANGIGFLSQTYD  
ATAALMGNTLLALSQQERERPAGETTLERFMREVIRPDAPVQNTRRFTTT  
PIRHGAVEVPAGQAILVLLAAANRDPAANPNPHTFRADRTAPTFTFSAG  
AHRPGEMLAVTVVTTVVEQLLKVGFEFASLSTQVTYRPSNPTRIPVLTD  
QAGT

*Salinispora pacifica* CNT569

>CYP107AX1 (2515693756) *Salinispora pacifica* CNT569

MHELLGLPTQASVDFRTWTNTLLSADANQPAQSRSAMANMRRFLIEQVAR  
KRARPGDDLDRFPGIRLAVPAHDIRWRESFRLRGLIALPVFR

*Salinispora arenicola* CNH643

>CYP244A1 (2561687070) *Salinispora arenicola* CNH643

VRCPDISAATFLRLSSLLPNPRINIHPQGRGHLSTFGRGVHYCIGAPLAR  
LQAQIALRGFLQRFPRARLSADTAPQWESEWMIRMSVLPALLA

*Salinispora arenicola* CNH962

>CYP107AX9 (2519870004) *Salinispora arenicola* CNH962

VTSPPHVVFVGHLLRDPHGQYNAPRGQAPVHHIRTPDGALAWLVMCYDDV  
RAALTDPQLSVEKRCSDAHRWGARVVASA

*Salinispora pacifica* CNR909

>CYP1278B5 (2561690705) *Salinispora pacifica* CNR909

MFELPAQVVAMLCGLDPAAGGEASRLVGRFVQCIPAAASPEQQQRAARAA  
AGLQELLGPKLDDTQHGLLGDLVRMATQVNWTDRAPELLANGIGFLSQTYD  
ATAALMGNTLLALSQQERERPAGETTLERFVREVIRHDAPVQNTRRFTTT  
PIRHGAVEVPAGQAVLVLLAAANRDPAANPNPHTFRADRTAPTFTFSAG  
AHLCPGEMLAVTVVTTVVEQLLKVGFEFARLSTQVTYRPSNPSTRIPVLTD  
QAGT

*Salinispora arenicola* CNX481

>CYP105CH2 (2518473081) *Salinispora arenicola* CNX481

TDFPEPHRLDIRRNARNHLAFSHGIHQCMGQNLARVEMQIALDTVLRRLP  
GLHLVTPFEELPFKYRHLVWGIKELRVAW

>CYP105CH1 (2518473082) *Salinispora arenicola* CNX481

VSSLPLPTYPKLRDPADPLLPPAEYLAIQSEKPIAKVLLPSGRPTWLITG  
HALARQVLTEPCVSVDRRHFNFPYDRTPIRSSRRWLGGHTSCWATTRPC  
TPSGGVC

*Salinispora arenicola* CNH963

>CYP107AX9 (2524589437) *Salinispora arenicola* CNH963

VTSPPHVVFVGHLLRDPHGQYNAPRGQAPVHHIRTPDGALAWLVMCYDDV  
RAALTDPQLSVEKRCSDAHRWGARVVASA

*Salinispora pacifica* CNS863

>CYP107CL2 (2517958783) *Salinispora pacifica* CNS863

VISLLVSVRDNQEQLTDEQVLNCAQLIVAGHETTRNLVANGWLWTLSSH  
DQLAKLWADPSLMTSAIREMMRFESPLQFVRRVARDDFDYLGVRIQAQDG  
VVTMLGSANRDPAFFTEPDRFDITRNPTGHVALSYGPHICLGAALAEMET  
EVALGLLLLERFPDLRAVDEQPERVMNPMLRGGGGDVRAGRVRVRQRHRAE  
PGRVNDPVVVVSATDEVLRDPAAGPHLLTGQERARLGSFGSESARRDFIA  
AHLVRLCAARLLGTGPAQVSFGQFCPGCHATRHGRPLLTDPRDIHLSTS  
HTAGVAAAAGHAPVGVDERHGRQSAALMRRVLAPAEFALVTEHPDPR  
HAFLPYREREPGGLDSLGDGGGAVTSPEPSGGASG

>CYP107CL2 (2517958785) *Salinispora pacifica* CNS863

LQITPEFMHDPYPVYVGMARDSAPVRLSDANAGRTWVPRYHDVIDVLRDD  
RFSALKAPAFINQFPPEQRVQFQPFNQSIAGWVVLQDPPAHRQLRQLMN  
KGFTRHLVAALRPKVTEIATGLVDTMATRRSGDFMTDFAQPFPAAVIATM  
FGYRPPT

*Salinispora tropica* CNB476

>CYP107AX4 (2518150279) *Salinispora tropica* CNB476

VRAALTDPRLSVDKRFSGTGGEHGSSLPPELDAHLLNRDPPDHTRLRRLA  
ATAFTPRRIAELQPAASLLDRFPGIRLAAPTHALRWRDSFRVRGLAALPV  
HL

*Salinispora tropica* CNT261

>CYP107X5 (2524771191) *Salinispora tropica* CNT261

VRAALTDPRLSVDKRFSGTGGEHGSSLPPELDAHLLNRDPPDHTRLRCLA  
ATAFTPRRIAELQPAASLLDRFPGIRMAAPTHALRWRDSFRVRGLTALPV  
HL

*Salinispora tropica* CNT261

>CYP107AY2 (2524773542) *Salinispora tropica* CNT261

MEGDRLTRDELTSIAFLILFAGYENTANLIAS TVLRLLDGGGVLEVRIPE  
AIEETLRLEPPAPAAIRRFPTTEMTNGGATIPVGD TVLLSIAAATRGTG  
HFARLAFGNGPHFCLGAGLARVEAEEAITV LARRLPGLALAVSGAPVRWR  
PTFRTHGPAELLVAW

*Salinispora tropica* CNR699

>CYP107AX5 (2519084399) *Salinispora tropica* CNR699

VRAALTDPRLSVDKRFSGTGGEHGSSLPPELDAHLLNRDPPDHTRLRCLA  
ATAFTPRRIAELQPAASLLDRFPGIRMAAPTHALRWRDSFRVRGLTALPV  
HL

>CYP107AY3 (2519087920) *Salinispora tropica* CNR699

MEGDRLTRDELTSIAFLILFAGYENTANLIAS TVLRLLDGGGVLEVRIPE  
AIEETLRLEPPAPAAIRRFPTTEMTIGGATIPVSD TVLLSIAAATRGTG  
HSARLAFGNGPHFCLGAGLARVEAEEAITV LARRLPGLALAVSGAPVRWR  
PTFRTHGPAELLVAW

*Salinispora tropica* CNY681

>CYP107AX4 (2562098018) *Salinispora tropica* CNY681

VRAALTDPRLSVDKRFSGTGGEHGSSLPPELDAHLLNRDPPDHTRLRRLA  
ATAFTPRRIAELQPAASLLDRFPGIRLAAPTHALRWRDSFRVRGLAALPV  
HL

*Salinispora arenicola* CNH718

>CYP107AY4 (2562081609) *Salinispora arenicola* CNH718

VAVRLAEYPPAPRWARPVSPLPWRDVSAARPSVVRTHQVRPAVYPPDRDA  
IRQAVTELHGYYVDLIDIKQQQPGDDL LSALVTIEQDGDRLSRDELTSIA  
FLILFAGYENTANLIASAVRWLLDHGGLNVVPISEATEGTLRHEPPAPVA  
FPPRTSSSGASRFRPVTPSCSVSPPPGADGNAARLAFGNGPHYCLGAAL  
ARVEAEEALTVLARRLPGLTLAVPPSQVRWRPTFRTHGPAELLVGW

*Salinispora arenicola* CNH646

>CYP244A1 (2515980370) *Salinispora arenicola* CNH646

VRCPTDISAATFLRLSSLLPNPRINIHPQGRGHLSFGRGVHYCIGAPLAR  
LQAQIALRGFLQRFPARLSADTAPQWESEWMIRRM SVLPALLA

*Salinispora pacifica* CNY202

>CYP107AW1(2528443850) *Salinispora pacifica* CNY202

VPAPTATLALMRNPDQHRWLLANQHALPEAIDEFLRYESPVAMATLRFTT  
TPVAVDDVVI PAGELVLVSLGGANRDPDRFPDADRLILDRRDTGHLAFGH  
GLHRCLGAFLGKLEGEVALGALLRQHPRALALAAEVRQLRWRDTIMLRGLE  
SLPVSLHG

*Salinispora pacifica* CNS-143

>CYP107FH3(2550587919) *Salinispora pacifica* CNS-143

ALGNGTLHMLHRDQWTALRADRALLDNAVEEFLRLESPLKHATFRCATE  
SLRIGDAEIAAGDFVLLAIASANRDP RR

>CYP124M3(2550588085) *Salinispora pacifica* CNS-143

PGLPHFASPEFGSAPRGRGCYALTRMDDVLAVSRNPSVFISGKGNVAMEV  
PAEFLDQSLITMDNPRHARLRRIVSRGFTMKAVTALMDNASQMAKQIVDE  
VVERGECDAVVDISAKLPLGIICNMMGIPDSQQQFVFEQTNVMLGVQDPE  
YVGEQNDAMLAMSVASQELADLMHELATLRANKPTDDLISKLLSAEVNGE  
AL

>CYP211B11(2550588578) *Salinispora pacifica* CNS-143

MDASEAVALLMSPPGRLDPYPTYERLRAHGPPVSTAAGFFVVTGYTEADT  
VLRNPRFEVMDDEERDGVFPHWQDSPAM

>CYP124M3(2550588938) *Salinispora pacifica* CNS-143

VISQRRRTVAEDAEPVKLAGQLLGPDKVLMFYGAANRDPNYFVHPEGFDV  
RRSPNPHVGYGGPGPHFCLGAHLARLEISVMFRELLTRIPDIHATGEPAR  
LKSPLINGIKRLPVAFTPGAR

>CYP208A22(2550589306) *Salinispora pacifica* CNS-143

MTVIADRGGRIPPGPPVTAGLRLLLLALGRDRLGMMTSAAA EYGDVARLPV  
GPKKLYFFNHPD

>CYP107AY9(2550589412) *Salinispora pacifica* CNS-143

VATGSPVDLVTGYCTPLSVQVIADLLGVPDAGRDTLRAWTDTMLTSYPPD  
RDAIRQAVVELHGYVVNLI EAKQQRPGDDL SALVATEQEGDRLTRDELT  
SLAFLILFAGYENTANLI ASTVLRLLDHGSLRGVRVSEAIEETLRLEPPA  
PAAIRRFPTTEEMTIGGATIPAGDTVLLSIAAATRGADGNPARLAFGNPH  
YCLGAALARVEAEEA

>CYP105AB37(2550591137) *Salinispora pacifica* CNS-143

PDRDL LERGARHHVAFGF GPHQCIGQTLARMELQIVFDTLFRRIP TLR LA  
APLDDIPFKSDAFVYGAERLPVAW

>CYP105AB28(2550591138) *Salinispora pacifica* CNS-143

RHTTPTEVRLRIQKELNTYL GALIDRKVADPTDDLLSRQIAKHHAAGTFD  
RTSLVSM AFLLLIAGHETTANMISLGVVGLLQHPDQ

>CYP208A22(2550591863) *Salinispora pacifica* CNS-143

TWIPLRRQRRFRRARQHLQEVDVLA AERGQAVEGRDDVLSRLILSTRAE  
ADPQLGRERLRDELVTLLLAGHETTASTLGWSLHLLDQHPELRERVRHEA  
RKVLGDRVPAYEDLHQLRYTAMVVEEAIRLYPPVWILTRKARAEDEIGGY  
RVPAGADILICPYTLHRHPRFWAE

>CYP1278B5(2550591980) *Salinispora pacifica* CNS-143

VCMP SRAQQIILNDPVRTPYEQIMFELPAQVVAMLCGLDPAAGGEASRLVG  
RFVQ CIPAAASPEQQQRAARAAAGLQELLGPKLDDTQHGLLGDLVRMATQ  
VNWTDRAPLLANGIGFLSQTYDATAALMGNTLLALSQQERERPAGE TALE  
RFVREVIRHDAFVQNTRRFTTTPIRHGAVEVPAGQAILVLLAAANRDPAA  
NPNPHTFRPHRVHLQRWG TPLPRRDAGRDRRDDGRRAAAEGWLRAGELVH  
AGDLP AI

>CYP107AX4(2550592098) *Salinispora pacifica* CNS-143

GVGMTSQPAPVFDQ LLLRDPHRRYNALRDEAPVHHIRTPDGAPAWLVTRY  
DDVRAAFTDPRLSVDKRLSSTDGEHGSSLPPSWMRIYSTVTHPTTLDSDV  
SQRPPSPLAASPTCAPRWSGSSARCWTVSSATTRRS

>CYP107AY9(2550592175) *Salinispora pacifica* CNS-143

AWLVTSPDLVSRALADPRLALNRKHSRGGWSGFALPPALDANLLNLDAPD  
HTRLRRLVGPAFSPQRVAALRPRIQR

>CYP107AX4(2550592995) *Salinispora pacifica* CNS-143

AMANMRRFLVEQLAHKRARP GDDLLTGLLAAREDDDRLTDDDELVAMLFLL  
MFAGYDNTAALIGNVVHALLTNTELPAAVRTGSLALDEL

>CYP211B11(2550593268) *Salinispora pacifica* CNS-143

FAYPLPVTVICALLGVPTADWARFRHWASDLTGVLEPEITPQELAIADAG  
ASELRDYFTELIAQRRRAPADDLT TALVQAHDADGDRLSGEELLANLVLL  
LVAGFETTTNLLGNGLVVLLTHPDSATALRGQPELAPGYVEEFLRYDSPV  
QLTSRTVRESVSLAGVELPAGSWLLVLLGAANRDPARFTD PARFDPRRAQ  
SPPLSFGAGAHYCLGAGLA

>CYP105AB28(2550593644) *Salinispora pacifica* CNS-143

LAKVRLTTGREAWWIAGHELGRAVLADRRFSSDRRRDNFPFVSTD PETRK  
QLRDQPTSMIGMDGAEHAQARRALMGFTVRRMAGLRPRIQQIVDQHIDE  
ML

*Salinispora arenicola* CNY679

>CYP107AY13(2562128543) *Salinispora arenicola* CNY679



MTAELTPIPRSSARLGQEYDQLRKTGDVHQVLLPDASLAWLVTNPDVAAR  
ALADPRLALNRRNSRGGWSGFALPPALDANLLNLDAPDHTRLRRLVGPAF  
SPQ RVAALRPGIRRAAEHLLDTLVATSRPTDLVTGYCNPLSVQVIADLMG  
VPEAGR TNLRATDTMLTSYPPDRDAIRQAVTELHG YVVDLIDLKQQQPG  
EDLLSVLV TIEQDGDRLTRDEL TSLAFLILFAGYENTANLIASAVLWLLD  
HGGLNVVPISEAIEATLRHEPPAPVAIRRFPTEDIIIGASRFRPVT PSCS  
VSPPPPGARTATFRGWFSATAPTTASVRPWPGSRPRRHSPCWPVGYPV

*Salinispora arenicola* CNX891

>CYP107AY2(2516009335) *Salinispora arenicola* CNX891

VAVRLAEYPPAPRWARPVSPLPWRDVSAARPSVVRTHQVRPAVYPPDRDA  
IRRAVTELHG YVVDLIDIKQQQPGDDLLSALVTIEQDGDRLSRDEL TSLA  
FLILFAGYENTANLIASAVLWLLDHGGLNVVPISEAIEATLRHEPPAPVA  
IRRFPTEDIIIGGLTIPAGDTVLLSIAAATRGADGNAARLAFGNGPHYCL  
GAALARVEAEALTVLARRLPGLTLAVPPSQVRWRPTFRTHGPAELLVGW

>CYP105CH2(2516011104) *Salinispora arenicola* CNX891

MPSAVEEFLRYFSVAVAVSRIATADLQVGGQLVRAGESMLLVNLT IARDS  
TDFPEPHRLDIRRNARNHLAFSHGIHQCMGQNLARVEMQIALD TVLRRLP  
GLHLVTPFEELPFKYRHLVWGIEELRVAW

>CYP105CH1(2516011105) *Salinispora arenicola* CNX891

VSSLPLPTYPKLRDPADPLLPPAEYLAIQSEKPIAKVLLPSGRPTWLITG  
HALARQVLTEPCVSVDRRHFNFPYDRTPIRSSRRWLGGHTSCWATTCPC  
TPSGGVC

*Salinispora pacifica* CNS996

>CYP161T1(2517961726) *Salinispora pacifica* CNS996

VQWHADGPVLGRCWAGVPYANWEQFRRWSDDAADMYDQERSVGGYQALRD  
YIAELAQVRLRMSGTDLISDLMESHRTEPEGFTLNQVVELGLTLLFAGHE  
TTVTAIDNGAVLLATHPEQRDRLADDP SLLDAAVEEILRAGELVLLGLAH  
ANVDERFFAESARFDVGRV PNRHLTFGNGPHFCAGAPLARLELQELSVAR  
LERFPGLRLAVPAERLEPRANLLTGGMTRVPV TW

*Salinispora arenicola* CNT-088

>CYP107AY2(2550298107) *Salinispora arenicola* CNT-088

YPPDRDAIRRAVTELHG YVVDLIDIKQQQPGDDLLSTLV TIEQDGDRLSR  
DEL TSLAFLILFAGYENTANLIASAVLWLLDHGGLNVVPISEAIEGTLRH  
EPPAPVAIRRFPTEDIIIGGV TIPAGDTVLLSVAAATRGADGNAARLAFG  
NGPHYCLGAALARVEAEALTVLARRLPGLTLAVPPSQVRWRPTFRTHGP  
AELLVGW

*Salinispora arenicola* CNY666

>CYP105AB37(2563515519) *Salinispora arenicola* CNY666

MTETASIEMTGTTSGPLTDADFPVQRGCPFTAPAEYEQIREESPIAKVHL  
KTGGEAWWIAGHELGRAVLADRRFSSDRRRDNFPFVSTD PETREQLQSQP

TSMLGMDGEEHAQARRALMGEFTVRRMAGLRPRIQQIVDQHIDEMLATTR  
RSVDLVEALSLPVPVSLVICELLGVADHDFQGLTGPLLRRHTTPTEVRV  
RIQEELNTYLGNLIDRKLTDPDLDLGRQIAKHHANGTFDRASMVSMAFL  
LLVAGHETTANMISLGVVGLLEHPDQLAMIKNNPDNTPLAVEELLRYFTI  
ADTVTARVATEDVQLGDDTISAGDGVVISGLAADRDPAVFADPDRLDLER  
GARHHVAFGFGPHQCIGQTLARMELQIVFDTLFHRIPTRLRLAAPLDDIPF  
KTDAFVYGIEELPVAW

>CYP125G(2563518214) *Salinispora arenicola* CNY666

VLALVDNPMQRERLVADDTLPSVVEELLRWVSPIMQFR

>CYP133D(2563518744) *Salinispora arenicola* CNY666

MIMIWIYGAANRDPQFDDPDVFDARRQRNAHLGFGRGIHFCLGAPLARME  
GRIALNALFDRFSRLRTVESDPPTFMPGFDTTGVNALTVDTRA

>CYP107EP1(2563519023) *Salinispora arenicola* CNY666

VRGADLAIGELTDMFRGVIMRQENPGDDLISQLLPAIDEGKLTMDLEP  
LCMFLPSAGSETTVNLIGNGVWALLANPDQWDMLCADPEGLAAGVVEETL  
RFDLPVQQYRRVVHQEIELAGEILAVDNELAILAAAANRDPVFDPPHRY  
DITRKSADTLFSFAGIHYCRGAALARVEAAAAFRAIAKRLPDLHAAGEP  
RRRDSFI IHGMLHFPLAAG

>CYP105AC(2563519050) *Salinispora arenicola* CNY666

MDAPEHTRLRLQLAGKFTARRMKDMRPLLERIVDDQLTAMEKHGPPADLV  
SLFALPVPVSLAICELSGVVPYRDRAEFQNSATLFSLEASAEDASRAMDEL  
YALLRQLVVDRDTDTGGLLSMLAAEGTLATEEIVGIGVLLLTAGHESTAG  
SLGLSTFTLLSHPEHLARLQAEPVLIDNAVEELLRYLTIFHFGVPRTPLE  
DVEVEGHLLRAGESITISLPAVNRDPSWFPEPDRLEFGRRTAGHMAFGYG  
IHQCLGQNLVRMEMRVALPAIFQRFPRALALVP

*Salinispora pacifica* CNY239

>CYP1278B5(2524946400) *Salinispora pacifica* CNY239

VCMPsRAQQIILNDPVRTPYEQLMFELPAQVVAMLCGLDPAAGGEASRLVG  
RFVQCIPAAASPEQQQRAARAAAGLQELLGPKLDDTQHGLLGDLVRMATQ  
VNWTDRAPLLANGIGFLSQTIDATAALMGNTLLALSQQERERPAGETTLE  
RFVREVIRHDAPVQNTRRFTTTPIRHGAVEVPAGQAILVLLAAANRDPAA  
NPNPHTFRADRTAPTFTFSAGAHRRPGEMLAVTVVTTVVEQLLKVGFEF  
ARLSTQVTYWSPSTRIPVLTDQAGT

*Salinispora pacifica* CNR942

>CYP107AX1(2518500391) *Salinispora pacifica* CNR942

MHELLGLPTQASVDFTWTNTLLSADANQPAQSRSAMNMRRFLIEQVAR  
KRARPGDDLDRFPGIRLAVPAHDIRWRESFRLRGLIALPVFR

*Salinispora pacifica* CNT029

>CYP105AB34 (2515958479) *Salinispora pacifica* CNT029

MTSSRRAAAPWSGHTPSKVRVRIQEELNTYLGGLIDRKVADPTDDLLSRQ  
IAKQHAAGTFDRTSLVSMALLLIAGHETTANMISLGVVGLLQHPDQLAM  
IKDDPEKTPPAVEELLRYFTITDVTARVATEDVQLGDTTITAGDGVVIS  
GLAADHDPTVFTDPNQIDLERGARHHVAFGFGPHQCIGQTLARLELQIVF  
DTLFRRIPTLRLAAPLDDIPFKSDAIYGAEEELPVAW

*Salinispora arenicola* CNX814

>CYP107AY2 (2517934903) *Salinispora arenicola* CNX814

VAVRLAEYPPAPRWARPVSPLPWRDVSAARPSVVRTHQVRPAVYPPDRDA  
IRRAVTELHGYVVDLIDIKQQQPGDDLSSALVTIEQDGDRLSRDELTSLA  
FLILFAGYENTANLIASAVLWLLDHGGLNVVPISEAIEATLRNEPPAPVA  
IRRFPTEDIIIGGLTIPAGDTVLLSIAAATRGADGNAARLAFGSGPHYCL  
GAALARVEAEEALTVLARRLPGLTLAVPPSQVRWRPTFRTHGPAELLVGW

>CYP107AY2 (2517934903) *Salinispora arenicola* CNX814

VAVRLAEYPPAPRWARPVSPLPWRDVSAARPSVVRTHQVRPAVYPPDRDA  
IRRAVTELHGYVVDLIDIKQQQPGDDLSSALVTIEQDGDRLSRDELTSLA  
FLILFAGYENTANLIASAVLWLLDHGGLNVVPISEAIEATLRNEPPAPVA  
IRRFPTEDIIIGGLTIPAGDTVLLSIAAATRGADGNAARLAFGSGPHYCL  
GAALARVEAEEALTVLARRLPGLTLAVPPSQVRWRPTFRTHGPAELLVGW

*Salinispora pacifica* CNT150

>CYP107AX2 (2515753010) *Salinispora pacifica* CNT150

VDKRFSSTDGEHGSSLSPKLDAHLLNRDPPDHTRLRRLAAAAFTPRRIAD  
LRPAVETTSTLLDGLAGNDHAELIGSLASPLPLQVMHEPLGLPTQASVD  
FRTWTNTLLSADANQPAQSCPAMANMRRFLIEQVAHKRARPADDLLTGLP  
PACLPAPFGCGWPCLPATYGGGNRSEYADWSPCRCSCRRRA  
*Salinispora tropica* CNS197

>CYP107AX5 (2515881744) *Salinispora tropica* CNS197

VRAALTDPRLSVDKRFSGTGGEHGSSLPPELDAHLLNRDPPDHTRLRCLA  
ATAFTPRRIAELQPAASLLDRFPGIRMAAPTHALRWRDSFRVRGLTALPV  
HL

*Salinispora tropica* CNY678

>CYP107AX4 (2562101862) *Salinispora tropica* CNY678

VRAALTDPRLSVDKRFSGTGGEHGSSQPPELDAHLLNRDPPDHTRLRRLA  
ATAFTPRRIAELQPVASLLDRFPGIRLAAPTHALRWRDSFRVRGLAALPV  
HL

*Salinispora arenicola* CNH905

>CYP244A1 (2515990906) *Salinispora arenicola* CNH905

VRCPTDISAATFLRLSSLLPNPRINIHPQGRGHLSTFGRGVHYCIGAPLAR

LQAQIALRGFLQRFPRARLSADTAPQWESEWMIRRM SVLPALLA

*Salinispora arenicola* CNS243

>CYP107AY2 (25246799690) *Salinispora arenicola* CNS243

VAVRLAEYPPAPRWARPVSPLPWRDVSAARPSVVRTHQVRPAVYPPDRDA  
IRRAVTELHGYVVDLIDIKQQQPGDDLLSTLVTIEQDGDRLSRDELTSIA  
FLILFAGYENTANLIASAVLWLLDHGGLNVVPISEAIEGTLRHEPPAPVA  
IRRFPTEDIIIGGV TIPAGDTVLLSVAAATRGADGNAARLAFGNGPHYCL  
GAALARVEAEEALTVLARRLPGLTLAVPPSQVRWRPTFRTHGPAELLVGW

*Salinispora pacifica* DSM 45546

>CYP208A26 (2516876818) *Salinispora pacifica* DSM 45546

MLTSAATKYGDVARLPVGPKRLYFFNHPDHAKHVLADNHANYAKGIGLVH  
ARRALGDGLLTSDGE

*Salinispora tropica* CNY012

>CYP107AX4 (2540881436) *Salinispora tropica* CNY012

VRAALTDPRLSVDKRFSGTGGEHGSSQPPELDAHLLNRDPPDHTRLRRLA  
ATAFTPRRIAELQPVASLSDRFPGIRLAPPTHALRWRDSFRVRGLAALPV  
HL

>CYP107AY3 (2540885071) *Salinispora tropica* CNY012

MEGDRLTRDELTSIAFLILIIAGYENTANLIAS TVLRLLDGGGVLEVRIPE  
AIEETLRLEPPAPAAIRRFPTTEMTIGGATIPVSDTVLLSIAAATRGTDG  
HSARLAFGNGPHFCLGAGLARVEAEEAITVLARRLPGLALAVSGAPVRWR  
PTFRTHGPAELLVAW

*Salinispora arenicola* CNY234

>CYP107AY2 (2519881166) *Salinispora arenicola* CNY234

VAVRLAEYPPAPRWARPVSPLPWRDVSAARPSVVRTHQVRPAVYPPDRDA  
IRRAVTELHGYVVDLIDIKQQQPGDDLLSTLVTIEQDGDRLSRDELTSIA  
FLILFAGYENTANLIASAVLWLLDHGGLNVVPISEAIEGTLRHEPPAPVA  
IRRFPTEDIIIGGV TIPAGDTVLLSVAAATRGADGNAARLAFGNGPHYCL  
GAALARVEAEEALTVLARRLPGLTLAVPPSQVRWRPTFRTHGPAELLVGW

*Salinispora tropica* CNT250

>CYP107AX4 (2540885241) *Salinispora tropica* CNT250

VRAALTDPRLSVDKRFSGTGGEHGSSLPPELDAHLLNRDPPDHTRLRRLA  
ATAFTPRRIAELQPAASLLDRFPGIRLAAPTHALRWRDSFRVRGLAALPV  
HL

*Salinispora arenicola* CNY486

>CYP107AX9 (2562094788) *Salinispora arenicola* CNY486

VTSPPHVVFGHLLLRDPHGQYNAPRGQAPVHHIRTPDGALAWLVMCYDDV  
RAALTDPQLSVEKRCSDAHRWGARVVASA

*Salinispora arenicola* CNB527

>CYP107AX7 (2515511962) *Salinispora arenicola* CNB527

VTSPPHVVFGHDLLRDPPGQYNALRGQAPVHHIRMPDGAPAWLVMRYDDV  
RAALTDPRLSVDKRFNHTVHRIR

>CYP244A2 (2515513914) *Salinispora arenicola* CNB527

VHYCIGAPLARLQAQIALRGFLQRFPRARSSADSARQWESERMIRMSVL  
PALLA

>CYP105J2 (2515514742) *Salinispora arenicola* CNB527

VPIVAAAVNDAQQKVLRIASALVGTGPEHKAQRKMLIPSFTFRRVNALR  
PVIQEIVDQQLDEMIKSGAPTDLIPARTPTRHMTRSWTI

>CYP105J4 (2515514743) *Salinispora arenicola* CNB527

MDYMSRLIAERRRNPGEGVLDDLLAQHGANDDADHDELVSTLVVQVAGNH  
GTTGSMIALGLFALLQHPEQLAELRADPSFFITSLINRDTDVHDAPNSLG  
WRHASAADHLTFGFGAHQCLGQSLARITMEIALGALIDRRPDLRPAVPAG  
TLREDR

*Salinispora arenicola* CNS-205

>CYP107AX13 (641514965) *Salinispora arenicola* CNS-205

VAVASLLDRCPGIRLAVPAHELRWRESFRVRGLAALPVRL

*Salinispora pacifica* CNT131

>CYP1278B5 (2516074202) *Salinispora pacifica* CNT131

VCMPsRAQQIILNDPVRTPYEQLMFELPAQVVAMLCGLDPAAGGEASRLVG  
RFVQCIPAAASPEQQQRAARAAAGLQELLGPKLDDTQHGLLGDLVRMATQ  
VNWTDRAPLLANGIGFLSQTYDATAALMGNTLLALSQQERERPAGETTLE  
RFVREVIRHDAPVQNTRRFTTTPIRHGAVEVPAGQAILVLLAAANRDPAA  
NPNPHTFRADRTAPTFTFSAGAHRRPGEMLAVTVVTTVVEQLLKVGFEF  
ARLSTQVTTYWSPSTRIPVLTDQAGT

*Salinispora pacifica* CNT609

>CYP107CT (2517981003) *Salinispora pacifica* CNT609

MAYARTGLEAWLVTAYEDVEFVLRGPRFRKSIDAMPLFAAQSGGTVAAR  
GSLLYNNMANNDDPPVHTRLRKPLNAMFTSRVVAISGPPAPGDNTPGSSKR  
QGRKVI PRRATEGRRLGTINR

*Salinispora tropica* CNB-440

>CYP107AX4 (640473449) *Salinispora tropica* CNB-440

MRAALTDPRLSVDKRFSGTGGEHGSSLPPELDAHLLNRDPPDHTRLRRLA  
ATAFTPRRIAELQPAASLLDRFPGIRLAAPTHALRWRDSFRVRGLAALPV  
HL

*Salinispora arenicola* CNY690

>CYP107AX8 (2562112655) *Salinispora arenicola* CNY690

VTSPPHVVFVGHDLRLDPHGQYSTLRGQAPVHHIRMPDGAPAWLVMRYDDV  
RAALTDPRLSVDKRFNHTVHRTR

>CYP244A2 (2562114523) *Salinispora arenicola* CNY690

VHYCIGAPLARLQAQIALRGFLQRFPRARLSADSARQWESERMIRMSVL  
PALLA

>CYP105J5 (2562115258) *Salinispora arenicola* CNY690

MDYMSRLIAERRRNPGEGVLDDLLAQHGANDDADHDELVSTLVVQVAGSH  
GTTGSMIALGLFALLQHPEQLAELRADPSFFITSLINRDTDVHDAPNSLG  
WRHASAADHLTFGFGAHQCLGQSLARITMEIALGALIDRRPDLPSPAVPAG  
TLREDR

>CYP105J2 (2562115259) *Salinispora arenicola* CNY690

VPIVAAAVNDAQQKVLRIASALVGTGPEHKAQRKMLIPSFTFRRVNALR  
PVIQEIVDQQLDEMIKSGAPTDLIPARTPTRHMTRSWTI

*Salinispora pacifica* CNT603

>CYP1278B5 (2515998598) *Salinispora pacifica* CNT603

VCMPSTRAQQIILNDPVRTPYEQLMFELPAQVVAMLCGLDPAAGGEASRLVG  
RFVQCIPAAASPEQQQRAARAAAGLQELLGPKLDDTQHGLLGDLVRMATQ  
VNWTDRAPLLANGIGFLSQTYDATAALMGNTLLALSQQERERPAGETTLE  
RFVREVIRHDAPVQNTRRFTTTPIRHGAVEVPAGQAILVLLAAANRDPAA  
NPNPHTFRADRTAPTFTFSAGAHRRPGEMLAVTVVTTVVEQLLKVGFEF  
ARLSTQVTTYWSPSTRIPLVLTQAGT

*Salinispora arenicola* CNB458

>CYP107AX8 (2518144632) *Salinispora arenicola* CNB458

VTSPPHVVFEGHDLRLDPHGQYSTLRGQAPVHHIRMPDGAPAWLVMRYDDV  
RAALTGPRLSVDKRFNHTVHRTR

>CYP244A2 (2518147454) *Salinispora arenicola* CNB458

VHYCIGAPLARLQAQIALRGFLQRFFPRARLSADSARQWESERMIRMSVL  
PALLA

>CYP105J2 (2518147496) *Salinispora arenicola* CNB458

VTLYDGRRVCAVTTHALARLLVDPRISSDRANPAWPTIVPIVAAAVNDA  
QQKVLRIASALVGTGPEHKAQRKMLIPSFTRRVNALRPVIEIVDQQL  
DEMIKSGAPTDLIPARTPTRHMTRSWTI

>CYP105J5 (2518147497) *Salinispora arenicola* CNB458

MDYMSRLIAERRRNPGEGLDDLLAQHGANDDADHDELVSTLVVQVAGSH  
GTTGSMIALGLFALLQHPEQLAELRADPSFFITSLINRDTDVHDAPNSLG  
WRHASAADHLTFGFGAHQCLGQSLARITMEIALGALIDRRPDLPAPVPAG  
TLREDR
