# Supplementary figures and images for: An Unprecedented Number of Cytochrome P450s Are Involved in Secondary Metabolism in Salinispora Species
Source: MDPI journal article supplement (doi:10.3390/microorganisms10050871), 2022-04-21

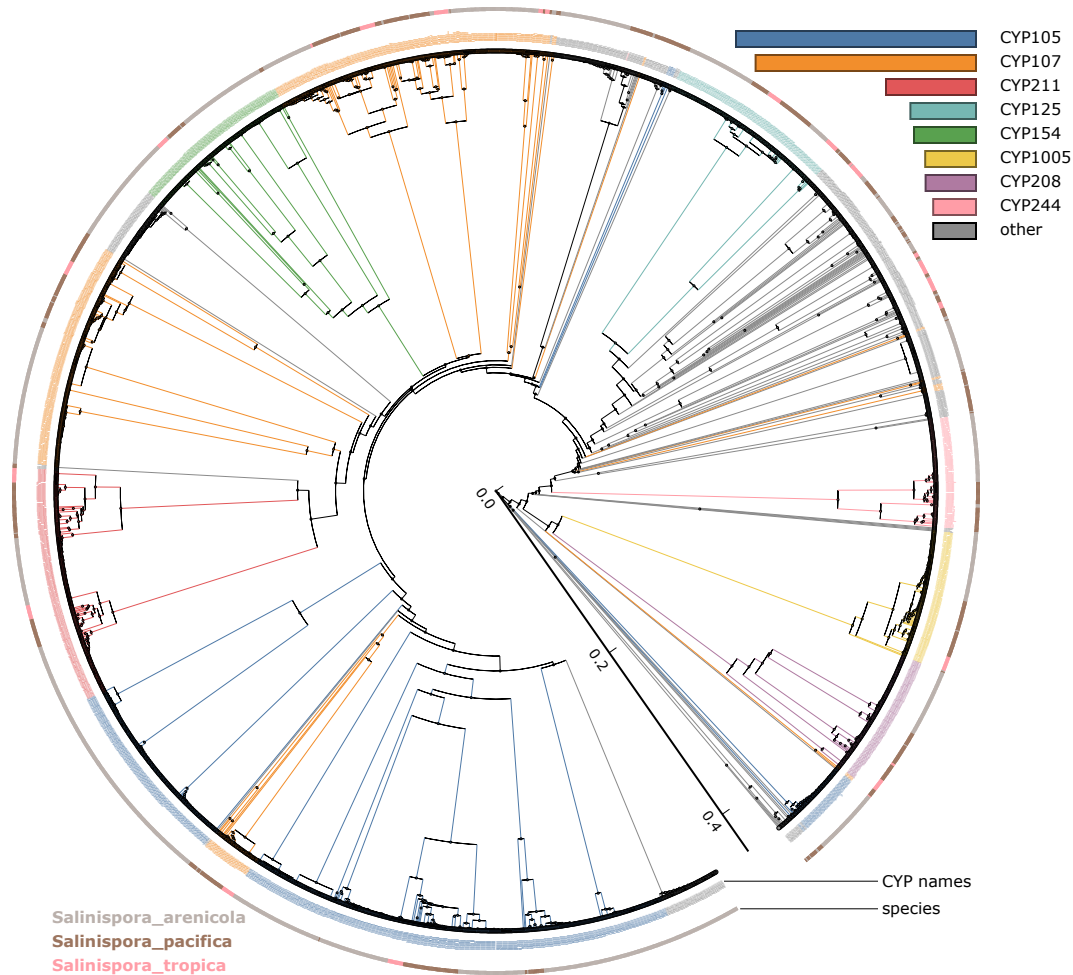

Supplement: s1 [file s1]
